# Supplementary material for: Investigating the effects of arginine methylation inhibitors on microdissected brain tumour biopsies maintained in a miniaturised perfusion system
Source: Royal Society of Chemistry journal article supplement (doi:10.1039/d3lc00204g), 2023-01-01
Supplement: d3lc00204g3.pdf [file d3lc00204g3.pdf]

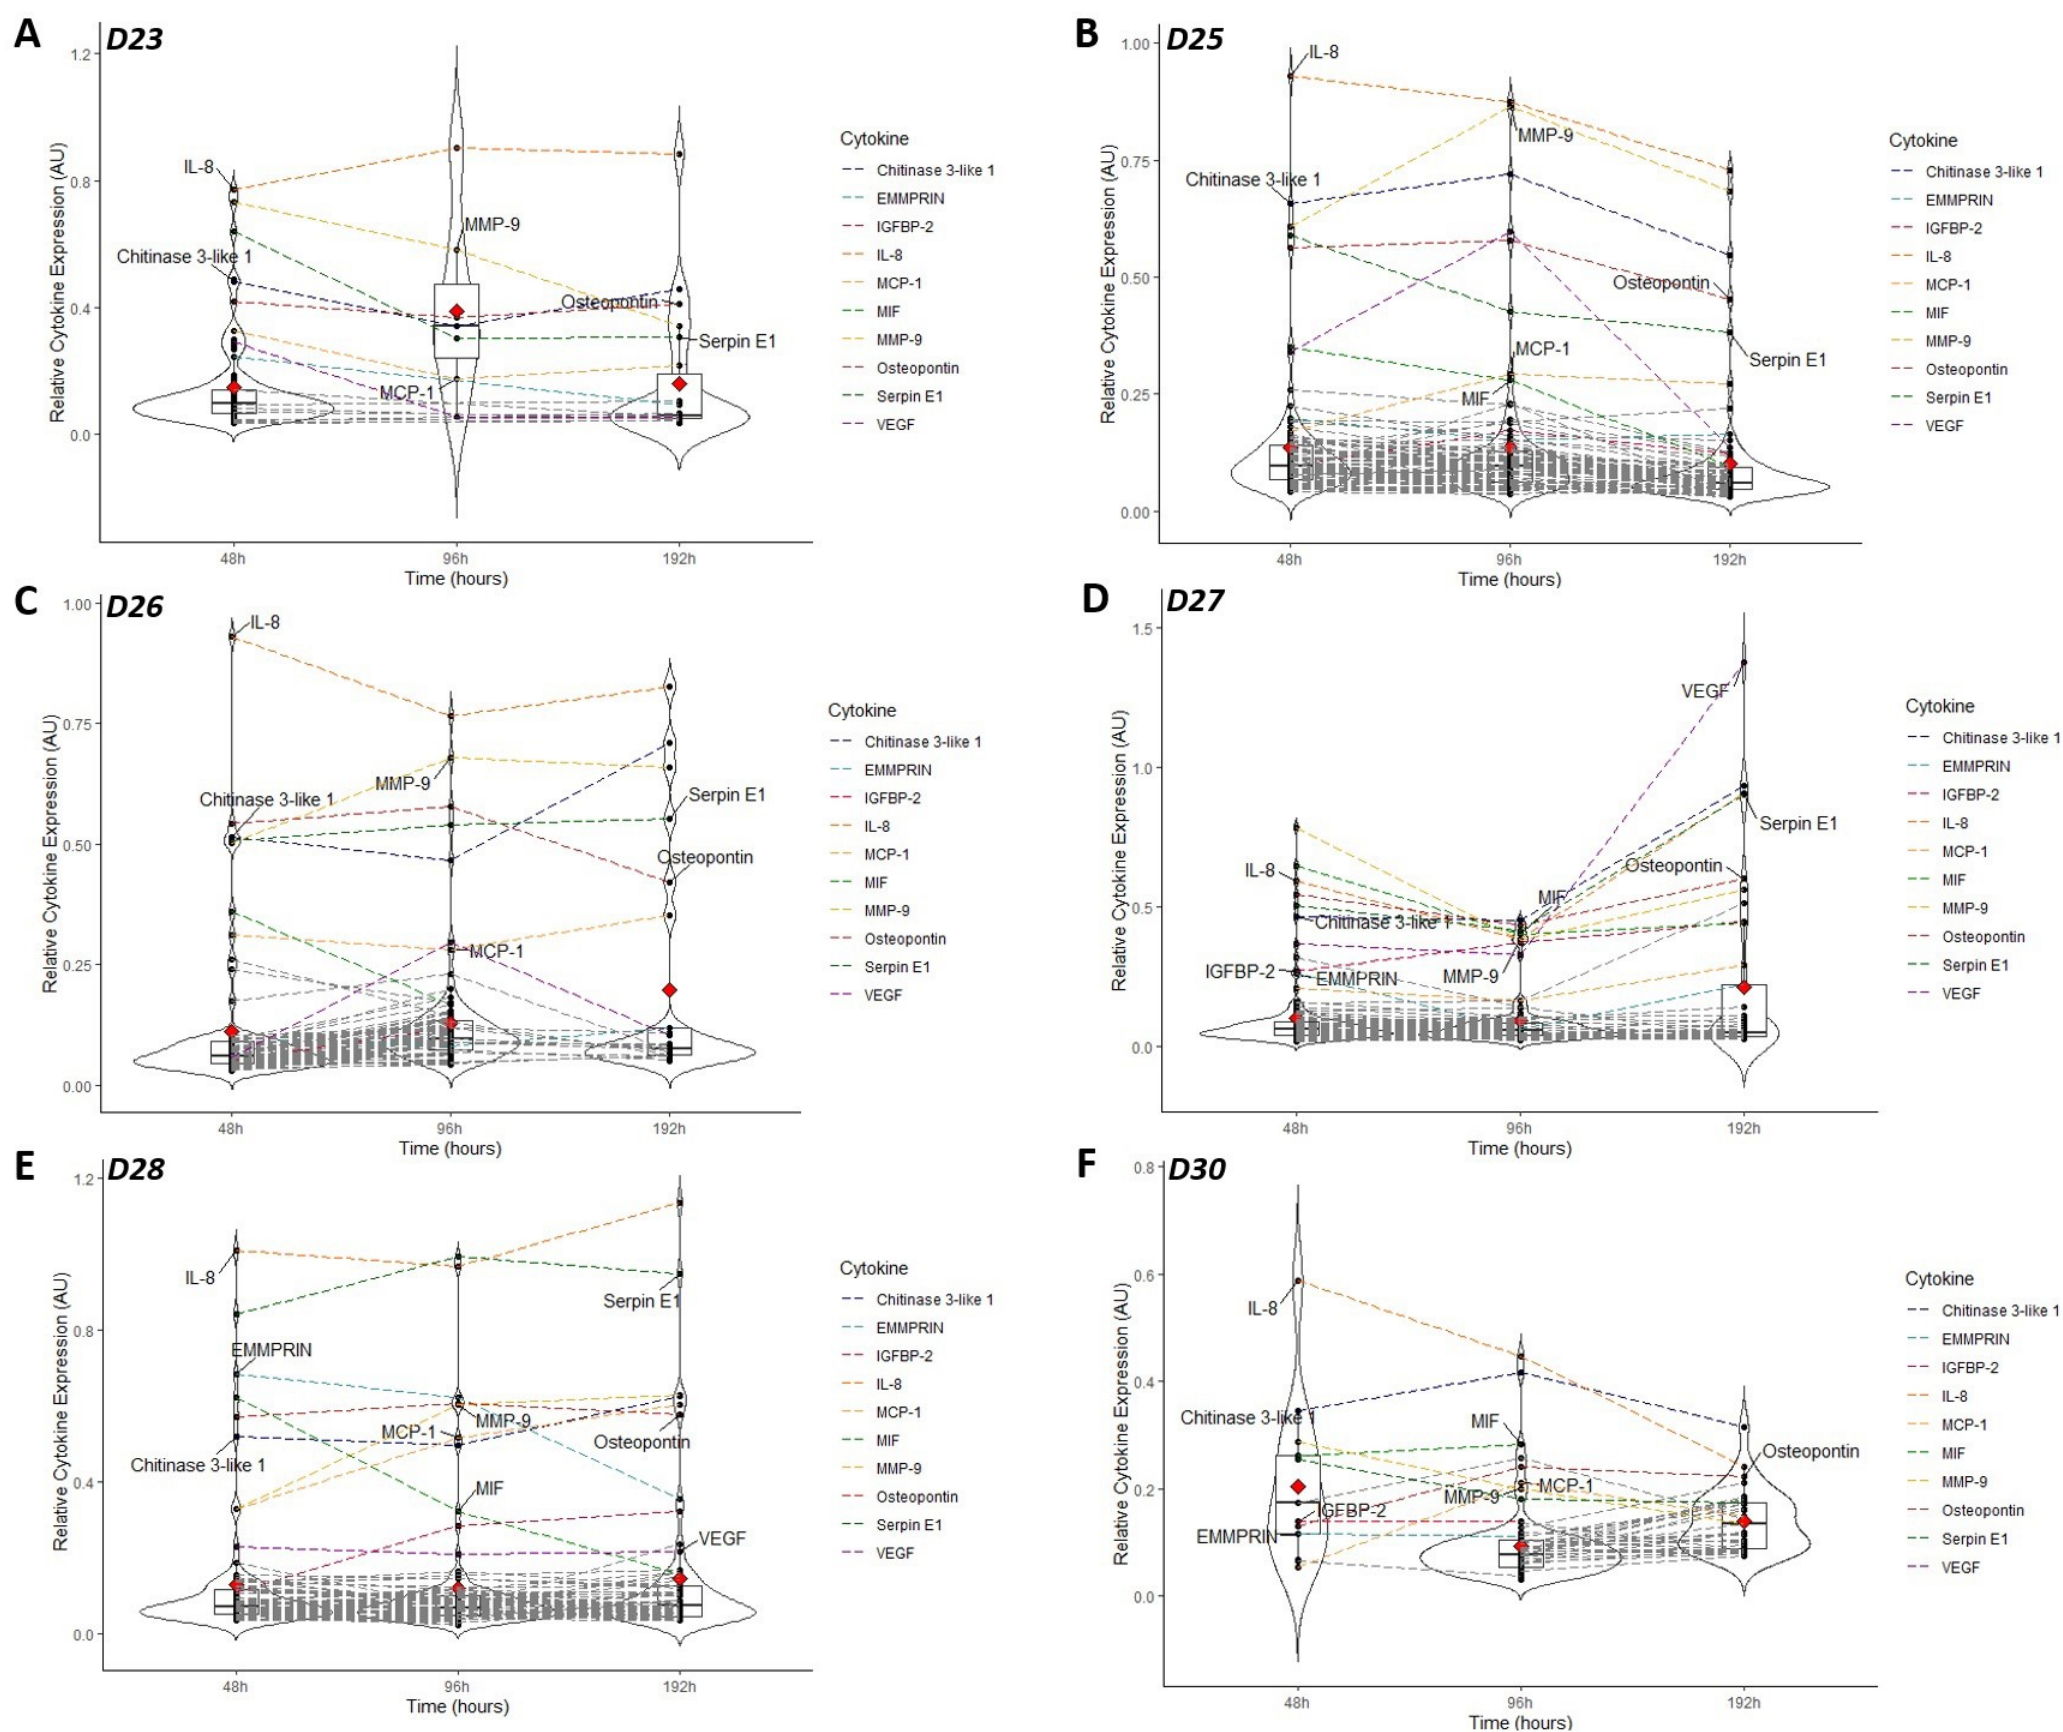

**Supplementary Figure 2: Average cytokine release at 48 hours, 96 hours and 192 hours (10 most highly expressed cytokines labelled and tracked using different coloured dashed lines) across duplicate control (DMSO) micro-dissected GBM biopsies: A) D23 B) D25, C) D26, D) D27, E) D28 and F) D30. Red diamonds indicate mean cytokine expression across all cytokines. Related to Figure 2E.**
