# Supplementary material for: Investigating the effects of arginine methylation inhibitors on microdissected brain tumour biopsies maintained in a miniaturised perfusion system
Source: Royal Society of Chemistry journal article supplement (doi:10.1039/d3lc00204g), 2023-01-01
Supplement: d3lc00204g4.pdf [file d3lc00204g4.pdf]

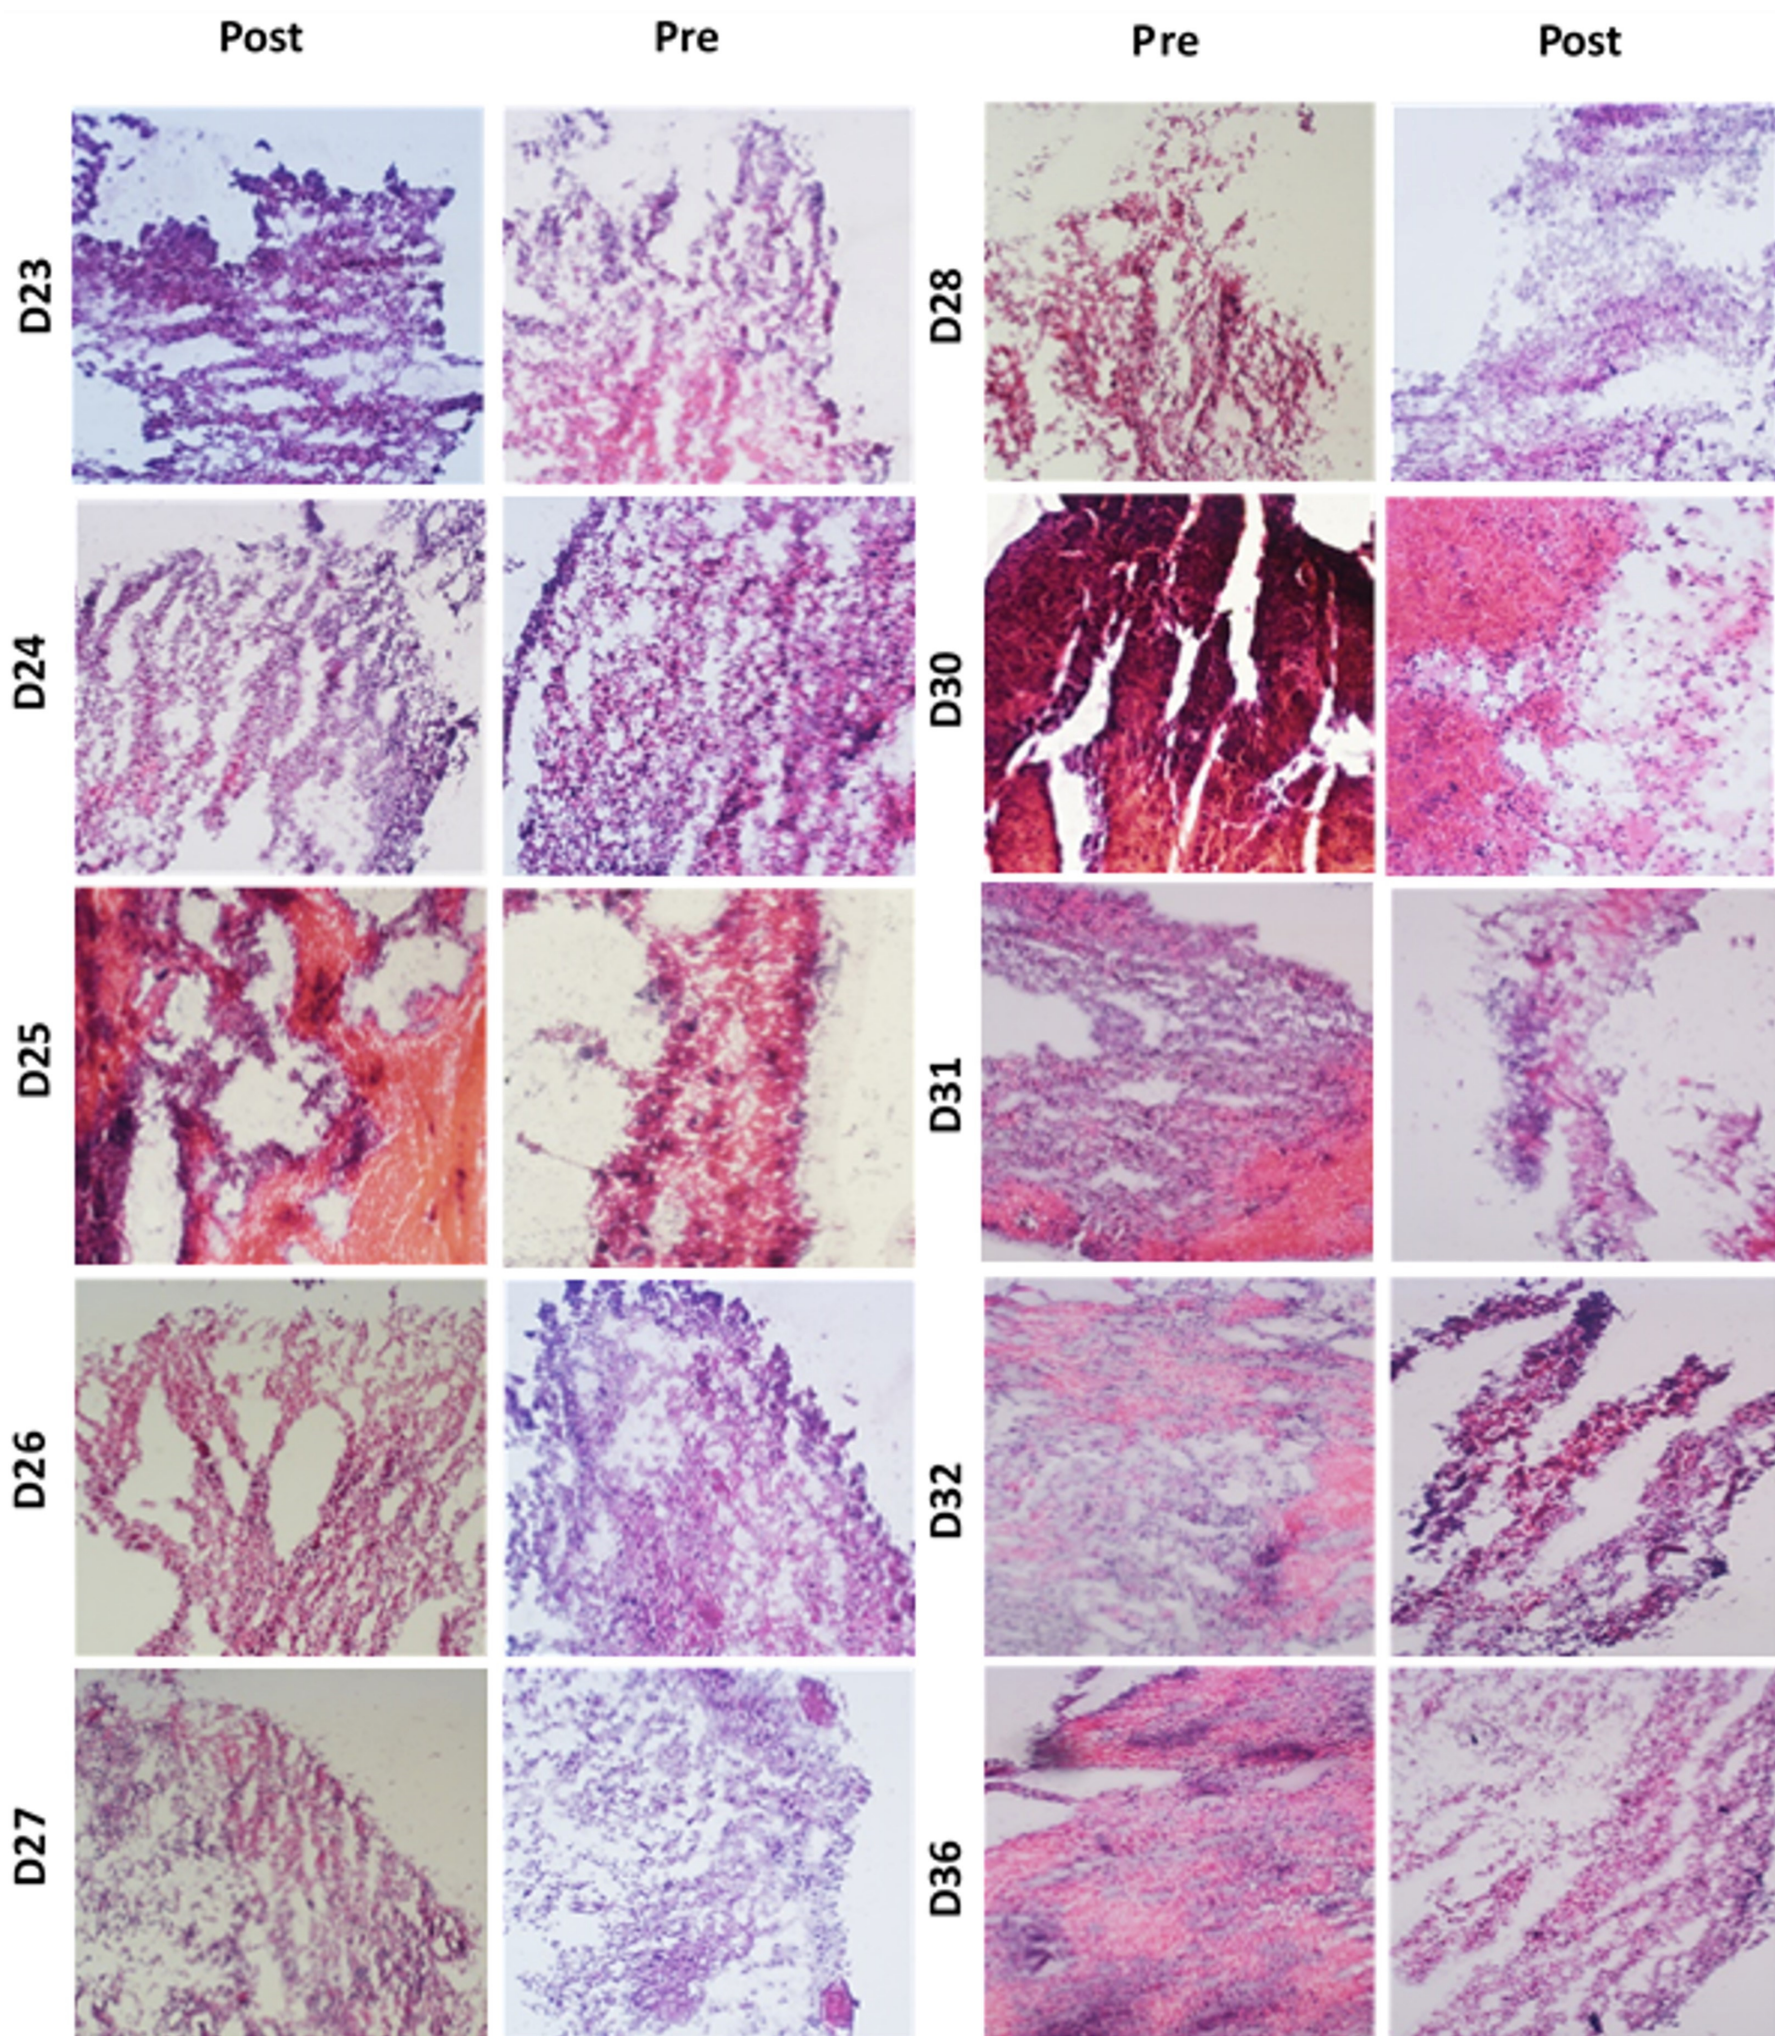

**Supplementary Figure 3** Haematoxylin and eosin stained sections of GBM tissue from 10 patients, pre- and 8 days post-chip (DMSO-treated control). Tissues were immersed in OCT before freezing in methylbutane, pre-chilled in liquid nitrogen. Images taken on Olympus IX71 Inverted fluorescence microscope, using CellSens Entry v1.18, x10 magnification.
