# Supplementary material for: Investigating the effects of arginine methylation inhibitors on microdissected brain tumour biopsies maintained in a miniaturised perfusion system
Source: Royal Society of Chemistry journal article supplement (doi:10.1039/d3lc00204g), 2023-01-01
Supplement: d3lc00204g6.pdf [file d3lc00204g6.pdf]

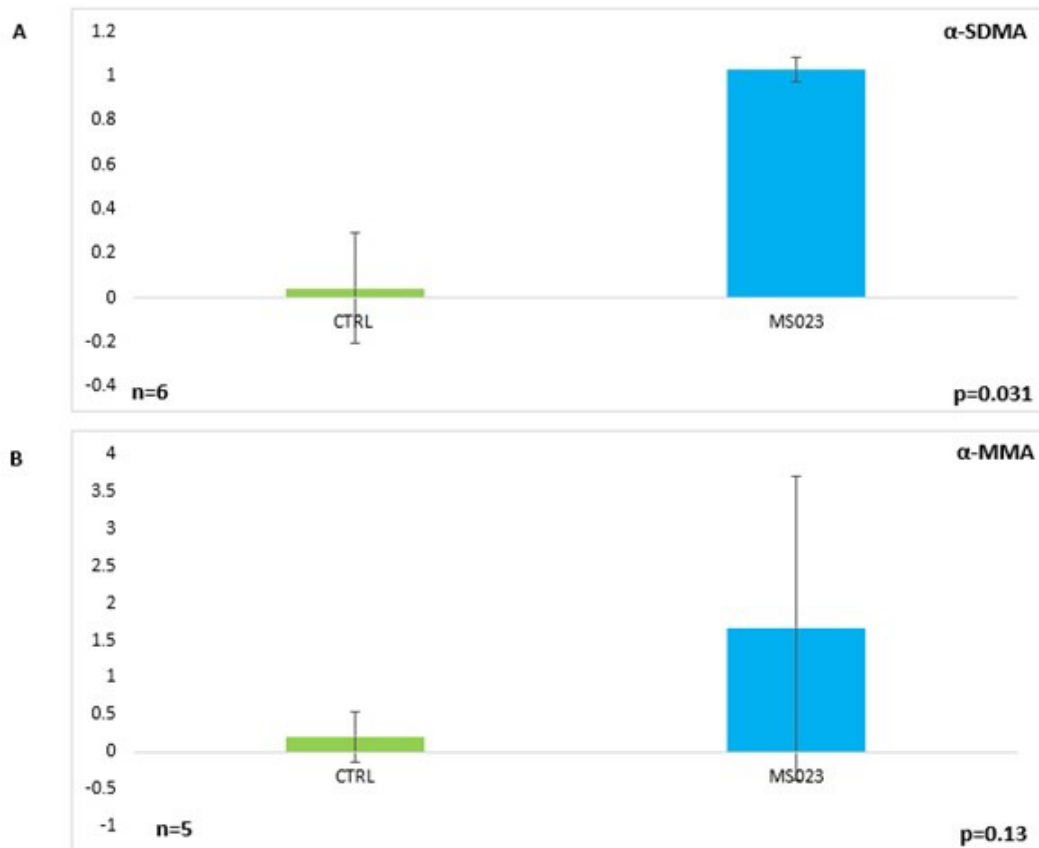

*Supplementary Figure 5: Relative densitometry analysis of the 70kDa band in control (DMSO) micro-dissected GBM biopsies and micro-dissected GBM biopsies treated with 100 nM MS023, shown in Figures 4A and 4B. With MS023 treatment, there was A) a significant increase in SDMA of the 70kDa protein (D8, D12, D14-D17) ( $V = 0$ ,  $p$ -value = 0.03125); and B) a trend towards an increase in MMA of the 70kDa protein, despite greater variability (D12, D14-D17) ( $V = 1$ ,  $p$ -value = 0.125).*
