# Supplementary material for: Investigating the effects of arginine methylation inhibitors on microdissected brain tumour biopsies maintained in a miniaturised perfusion system
Source: Royal Society of Chemistry journal article supplement (doi:10.1039/d3lc00204g), 2023-01-01
Supplement: d3lc00204g7.pdf [file d3lc00204g7.pdf]

## Biological Process

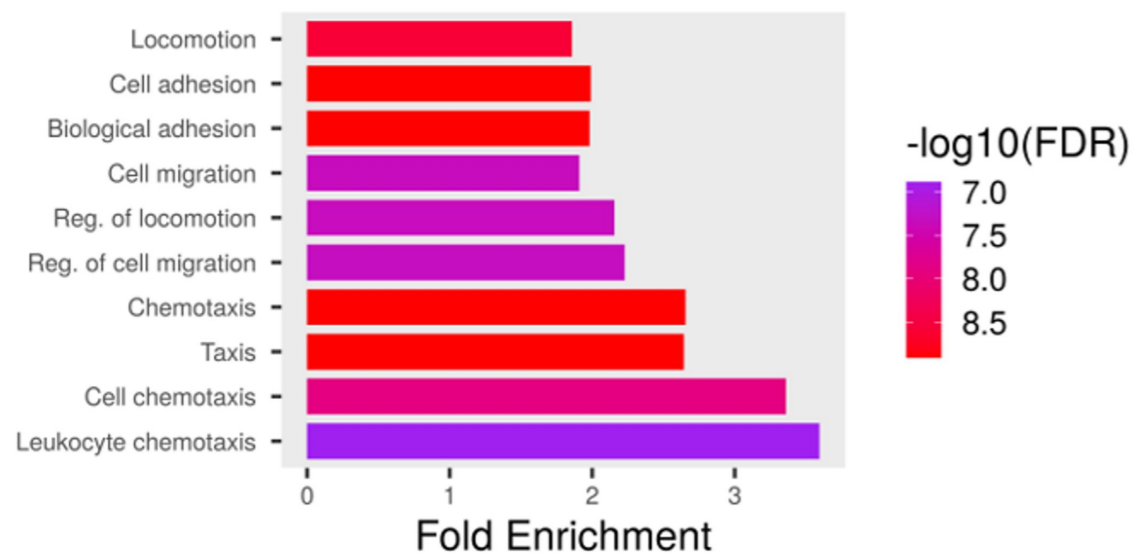

## Cellular Component

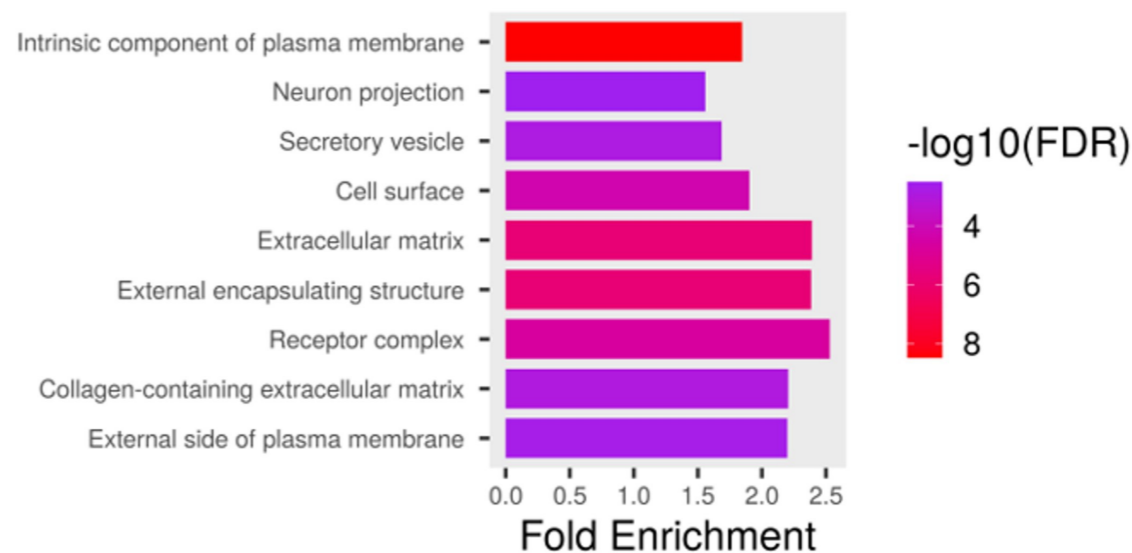

## Molecular Function

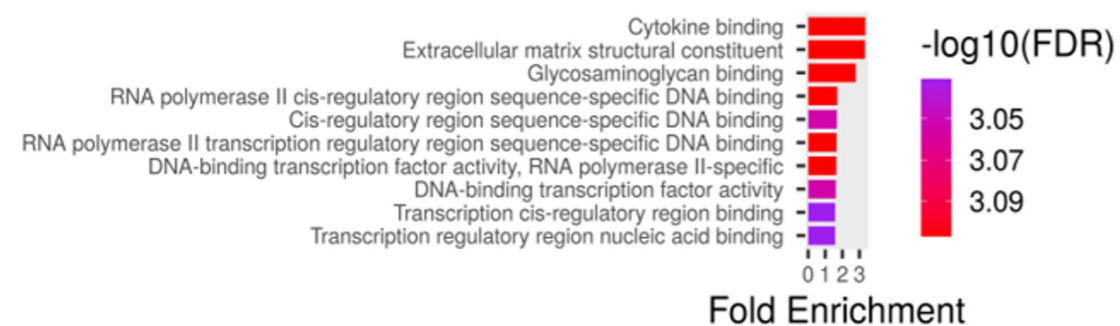

## KEGG

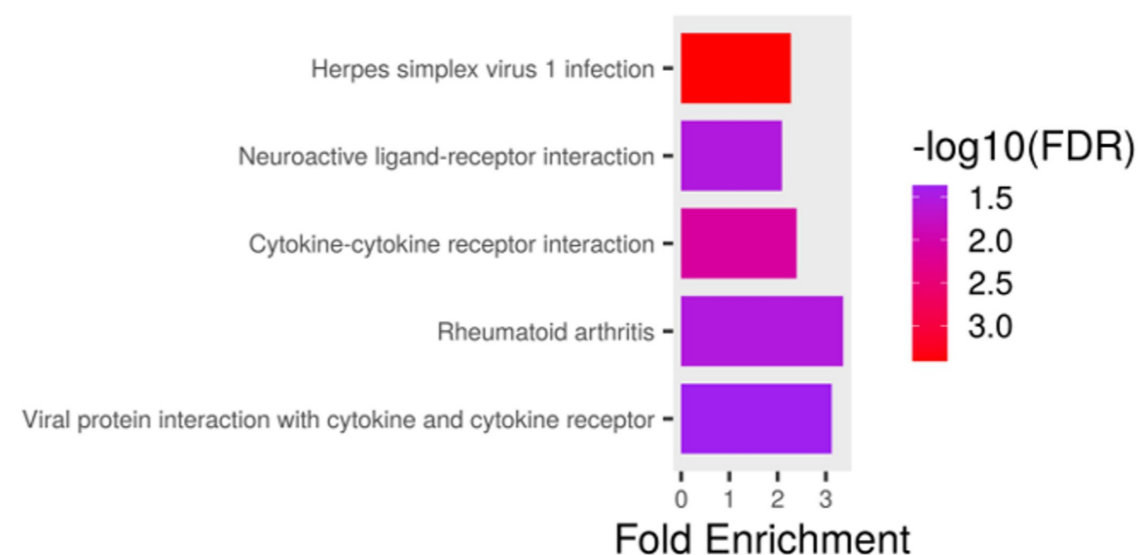

**Supplementary Figure 6 Gene Ontology (GO) analysis (ShinyGO (Ge SX, Jung D & Yao R, *Bioinformatics* 36:2628–2629, 2020; <http://bioinformatics.sdstate.edu/go/>)) of significantly ( $p < 0.05$ ) upregulated differentially expressed genes (DEGs) (fold change  $> 1.5$ ), common to 2 or more patients, in RNA-seq analysis of 4 patient GBM samples (D31-D34), 8-days post-chip and treated with 1  $\mu\text{M}$  GSK715 vs DMSO control.**
