# Supplementary material for: Investigating the effects of arginine methylation inhibitors on microdissected brain tumour biopsies maintained in a miniaturised perfusion system
Source: Royal Society of Chemistry journal article supplement (doi:10.1039/d3lc00204g), 2023-01-01
Supplement: d3lc00204g8.pdf [file d3lc00204g8.pdf]

## Biological Process

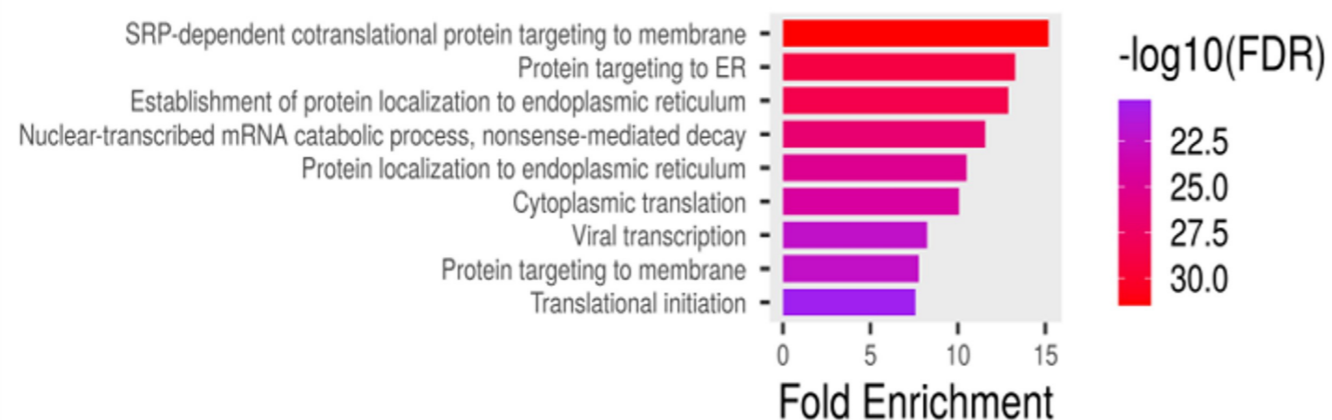

## Cellular Component

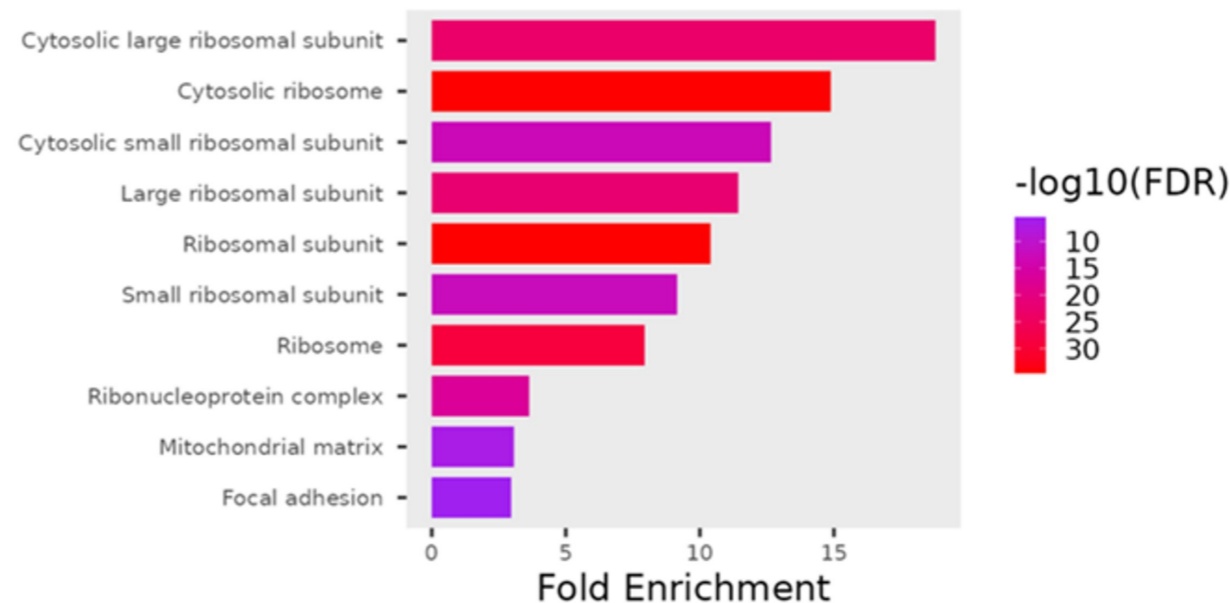

## KEGG

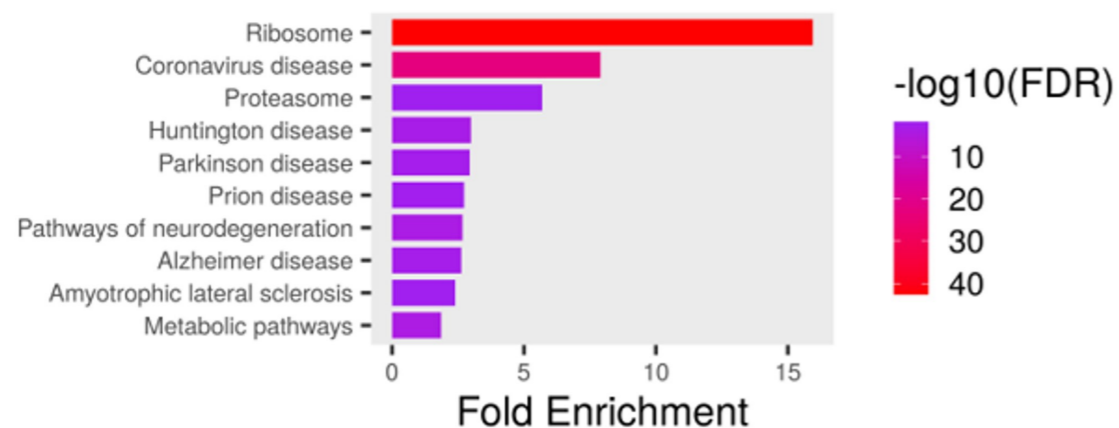

## Molecular Function

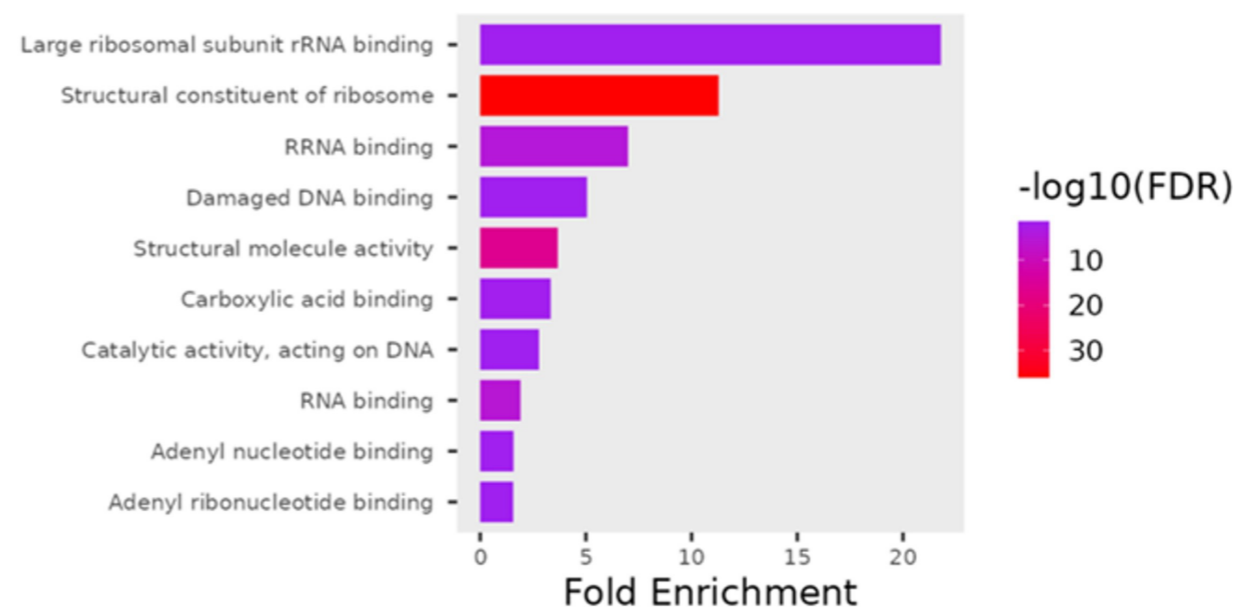

**Supplementary Figure 7** Gene Ontology (GO) analysis (ShinyGO (Ge SX, Jung D & Yao R, *Bioinformatics* 36:2628–2629, 2020; <http://bioinformatics.sdstate.edu/go/>)) of significantly ( $p < 0.05$ ) downregulated differentially expressed genes (DEGs) (fold change  $< -1.5$ ), common to 2 or more patients, in RNA-seq analysis of 4 patient (D31-D34) GBM samples, 8-days post-chip and treated with 1  $\mu\text{M}$  GSK715 vs DMSO control.
