# Supplementary material for: Investigating the effects of arginine methylation inhibitors on microdissected brain tumour biopsies maintained in a miniaturised perfusion system
Source: Royal Society of Chemistry journal article supplement (doi:10.1039/d3lc00204g), 2023-01-01
Supplement: d3lc00204g9.xlsx [file d3lc00204g9.xlsx]

## Sheet: GO Enrichment
Supplementary Table 1: ShinyGO analysis of GBM58 and GBM63 primary cell line spheroids pre- vs 3-days post-perfusion
Relating to Figure 1
		Biological Process			Molecular Function			KEGG
		Pathway name	Fold enrichment	pvalue	Pathway name	Fold enrichment	pvalue	Pathway name	Fold enrichment	pvalue
	GBM58 Upregulated	Defense response to virus	8.04849	3.2e-14	CXCR chemokine receptor binding	33.9659	2.69e-07	IL-17 signaling pathway	15.9656	6.06e-14
		Response to virus	6.90707	1.63e-14	Chemokine activity	13.2335	6.18e-07	TNF signaling pathway	15.5966	4.74e-16
		Cytokine-mediated signaling pathway	5.24951	1.3e-22	Chemokine receptor binding	8.82232	1.82e-05	Viral protein interaction with cytokine and cytokine receptor	14.1157	1.37e-12
		Response to cytokine	5.10111	1.27e-32	Cytokine activity	6.69513	1.99e-09	Rheumatoid arthritis	13.291	9.84e-11
		Cellular response to cytokine stimulus	5.00808	4.7e-29	Cytokine receptor binding	5.34196	3.71e-07	NF-kappa B signaling pathway	11.7574	4.81e-10
		Cell migration	3.35082	1.63e-14	Peptidase regulator activity	4.57836	0.000491249	NOD-like receptor signaling pathway	10.1898	1.74e-13
		Response to biotic stimulus	3.34693	9.51e-18	Receptor ligand activity	3.8922	1.07e-06	Lipid and atherosclerosis	8.97898	4e-13
		Response to other organism	3.32326	3.91e-17	Signaling receptor activator activity	3.80405	1.44e-06	Influenza A	8.17226	3.62e-09
		Cell motility	3.14742	3.2e-14	Signaling receptor binding	2.48531	5.01e-07	Cytokine-cytokine receptor interaction	7.12988	2.65e-12
								Pathways in cancer	4.61424	5.72e-10
	GBM63 Upregulated	Pentose biosynthetic proc.	227.96	3.33e-05	Sulfiredoxin activity	202.631	0.00134288	Ferroptosis	44.48	2.44e-07
		Detoxification	18.609	1.61e-06	Protein-disulfide reductase (NAD(P)) activity	91.184	0.000508675	Glutathione metabolism	37.3268	8.35e-08
		Response to toxic substance	14.9671	8.19e-09	Oxidoreductase activity, acting on a sulfur group of donors, NAD(P) as acceptor	75.9867	0.000556897	Pentose phosphate pathway	30.3947	0.0024969
		Import across plasma membrane	14.3034	2.43e-05	Neutral amino acid transmembrane transporter activity	32.8591	0.000556897	Mineral absorption	20.2631	0.00131762
		Cellular response to oxidative stress	10.2874	5.55e-06	Oxidoreductase activity, acting on a sulfur group of donors	26.662	0.000233162	Cysteine and methionine metabolism	18.2368	0.00862351
		Response to oxidative stress	8.06389	5.47e-06	Antioxidant activity	15.3508	0.000894359	P53 signaling pathway	16.6546	0.00227803
		Reg. of apoptotic proc.	3.89437	1.7e-05	Carboxylic acid transmembrane transporter activity	11.4697	0.000821944	Central carbon metabolism in cancer	13.0263	0.0197581
		Reg. of programmed cell death	3.79031	2.03e-05	Oxidoreductase activity	5.09611	0.00018667	Carbon metabolism	10.5721	0.00862351
								Biosynthesis of cofactors	7.84378	0.0197581
								Metabolic pathways	3.18477	0.00114446
	GBM63 Downregulated	Signal transduction downstream of smoothened	142.031	0.0255896	Extracellular matrix structural constituent conferring tensile strength	18.9375	0.0104032
		Pos. reg. of hh target transcription factor activity	142.031	0.0255896	Extracellular matrix structural constituent	10.3087	8.4e-05
		Collagen fibril organization	10.5643	0.0135507
		Extracellular matrix organization	5.20781	0.00755788
		Extracellular structure organization	5.19626	0.00755788
		External encapsulating structure organization	5.16193	0.00755788
	Both Upregulated	Cysteine metabolic proc.	292.256	4.95339e-05	Stem cell factor receptor binding	316.611	0.0291721	Ferroptosis	123.556	1.13617e-06
		Glutathione biosynthetic proc.	211.074	8.36352e-05	Superoxide dismutase activity	253.289	0.0291721	Cysteine and methionine metabolism	50.6578	0.00961773
		Nonribosomal peptide biosynthetic proc.	189.967	9.72733e-05	Acid-amino acid ligase activity	115.131	0.0128758	Glutathione metabolism	44.4366	0.00961773
		Glutamate metabolic proc.	108.552	0.000332609	Neutral amino acid transmembrane transporter activity	68.4565	0.0142754	P53 signaling pathway	34.6971	0.012575
		Neg. reg. of extrinsic apoptotic signaling pathway	42.2148	0.000292909	Ligase activity, forming carbon-nitrogen bonds	47.7904	0.0193663	Hematopoietic cell lineage	25.5847	0.0191099
		Extrinsic apoptotic signaling pathway	25.8458	0.000164265	Carboxylic acid transmembrane transporter activity	23.8952	0.0128758	Biosynthesis of cofactors	24.5118	0.00490162
		Neg. reg. of cell death	9.0866	0.000160778	Secondary active transmembrane transporter activity	15.4444	0.0193663	HIF-1 signaling pathway	23.2375	0.0197822
		Reg. of apoptotic proc.	7.72693	4.95339e-05	Lipid binding	6.24634	0.0291721	Phagosome	16.7741	0.0326581
		Reg. of programmed cell death	7.52045	4.95339e-05				Hepatocellular carcinoma	15.167	0.0330191
								Pathways in cancer	7.16855	0.0330191
	Both Downregulated	Elastic fiber assembly	155.075	0.0101557	Transforming growth factor beta binding	86.8419	0.00782037
		Collagen fibril organization	26.9138	0.0201186	Extracellular matrix structural constituent conferring tensile strength	48.2455	0.0191417
		Extracellular matrix organization	14.4737	0.000471065	Extracellular matrix structural constituent	23.3446	0.00225786
		Extracellular structure organization	14.4416	0.000471065	Sulfur compound binding	15.5075	0.00554079
		External encapsulating structure organization	14.3461	0.000471065	Glycosaminoglycan binding	12.8718	0.0303738
	GBM58 Upregulated, GBM63 Downregulated	Neg. reg. of response to tumor cell	1424.75	0.0375183	Polyamine oxidase activity	1899.67	0.00631565	Phenylalanine, tyrosine and tryptophan biosynthesis	949.833	0.0105247
		Tyrosine catabolic proc.	949.833	0.0375183	Oxidoreductase activity, acting on the CH-NH group of donors, oxygen as acceptor	1424.75	0.00631565	Phenylalanine metabolism	335.235	0.0124932
		L-phenylalanine catabolic proc.	712.375	0.0375183	Oxidoreductase activity, acting on the CH-NH2 group of donors, oxygen as acceptor	356.188	0.01656	Tyrosine metabolism	158.306	0.0124932
		Reg. of T cell mediated immune response to tumor cell	569.9	0.0375183	Oxidoreductase activity, acting on the CH-NH2 group of donors	271.381	0.01656	Alanine, aspartate and glutamate metabolism	154.027	0.0124932
		L-phenylalanine metabolic proc.	518.091	0.0375183	Oxidoreductase activity, acting on the CH-NH group of donors	183.839	0.0195438	Tryptophan metabolism	135.69	0.0124932
		Tryptophan catabolic proc.	474.917	0.0375183				Valine, leucine and isoleucine degradation	118.729	0.0124932
		Tyrosine metabolic proc.	438.385	0.0375183				Cysteine and methionine metabolism	113.98	0.0124932
		Tryptophan metabolic proc.	407.071	0.0375183				Wnt signaling pathway	34.3313	0.0360165
								Human T-cell leukemia virus 1 infection	25.6712	0.042657
