# Supplementary material for: Investigating the effects of arginine methylation inhibitors on microdissected brain tumour biopsies maintained in a miniaturised perfusion system
Source: Royal Society of Chemistry journal article supplement (doi:10.1039/d3lc00204g), 2023-01-01
Supplement: d3lc00204g10.xlsx [file d3lc00204g10.xlsx]

## Sheet: Legend
Legend to Supp Table 2
The first two tabs show the methylated peptide identifications in each pool. The position of methylation is annotated as either +14.02 (light) or +18.04 (heavy) within the peptide sequence in the left most column. The data in the PTM column are colour-coded red for heavy and green for light to aid visualisation. The -10lgP tab is the metric for peptide identification probability. Please note that…
The second two tabs show all peptide identifications in each pool.
Relating to Figure 4

## Sheet: Pool1_methyl_peptide_ID
Methylated Peptides Identified in 'pool 1'
Peptide	-10lgP	Mass	Length	ppm	m/z	RT	Area	Fraction	Scan	#Feature	Accession	PTM	AScore	Peptide + Accession
EALVEALAAAGR(+18.04)ER	21.17	1472.82	14	2.6	737.42	49.53	0	1	16479	0	A6NC98	Methyl:2H(3)13C(1)	R12:Methyl:2H(3)13C(1):14.63	EALVEALAAAGR(+18.04)ER - A6NC98
DGVRGLTGPIGPPGPAGAPGDKGESGPSGPAGPTGARGAPGDR(+18.04)	23.8	3834.93	43	-0.7	767.992	36.7	246000	1	10149	1	P02452	Methyl:2H(3)13C(1)	R43:Methyl:2H(3)13C(1):3.38	DGVRGLTGPIGPPGPAGAPGDKGESGPSGPAGPTGARGAPGDR(+18.04) - P02452
GGRGR(+18.04)GGPMGR(+18.04)GGYGGGGSGGGGR	24.5	2069.02	24	-0.4	690.681	41.85	46300	1	12944	1	P35637	Methyl:2H(3)13C(1)	R5:Methyl:2H(3)13C(1):0.00;R11:Methyl:2H(3)13C(1):5.09	GGRGR(+18.04)GGPMGR(+18.04)GGYGGGGSGGGGR - P35637
ASPAGTAGGPGAGAAAGGTGPLAARAGEPAER(+18.04)	21.95	2691.36	32	0.1	898.127	49.33	0	1	16395	0	Q12962	Methyl:2H(3)13C(1)	R32:Methyl:2H(3)13C(1):0.00	ASPAGTAGGPGAGAAAGGTGPLAARAGEPAER(+18.04) - Q12962
EAGIQARSGGDER(+18.04)KAR	22.31	1717.91	16	0.9	573.644	32.67	0	1	8140	0	Q5T0F9	Methyl:2H(3)13C(1)	R13:Methyl:2H(3)13C(1):9.27	EAGIQARSGGDER(+18.04)KAR - Q5T0F9
HAAGAANAGPAAGPR(+18.04)	23.29	1305.68	15	-0.4	653.847	37.24	0	1	10483	0	Q8N5H3	Methyl:2H(3)13C(1)	R15:Methyl:2H(3)13C(1):1000.00	HAAGAANAGPAAGPR(+18.04) - Q8N5H3
WVPAGGSTGFSR(+18.04)VHIYHHTGNNTFR	27.4	2815.4	25	-1.3	470.239	33.52	0	1	8551	0	Q8N8S7	Methyl:2H(3)13C(1)	R12:Methyl:2H(3)13C(1):7.62	WVPAGGSTGFSR(+18.04)VHIYHHTGNNTFR - Q8N8S7
R(+18.04)R(+18.04)ESPEGDSFVASAYASGR	20.68	2077.04	19	-0.3	1039.53	51.87	0	1	17737	0	Q969F2	Methyl:2H(3)13C(1)	R1:Methyl:2H(3)13C(1):0.00;R2:Methyl:2H(3)13C(1):0.00	R(+18.04)R(+18.04)ESPEGDSFVASAYASGR - Q969F2
R(+18.04)GFSDSGGGPPAK	22.35	1249.63	13	-0.7	625.823	31.6	10400	1	7617	1	Q9H307	Methyl:2H(3)13C(1)	R1:Methyl:2H(3)13C(1):1000.00	R(+18.04)GFSDSGGGPPAK - Q9H307
AGFLPRPSGAAPPAPPTR(+18.04)	24.1	1776.99	18	-0.5	889.502	49.91	0	1	16653	0	Q9ULI4	Methyl:2H(3)13C(1)	R18:Methyl:2H(3)13C(1):6.83	AGFLPRPSGAAPPAPPTR(+18.04) - Q9ULI4
VC(+57.02)GR(+14.02)GGGGSFGYSYGGGSGGGFSASSLGGGFGGGSR	52.82	3190.39	36	0.5	1064.47	40.31	0	1	12155	0	P35527	Carbamidomethylation; Methylation(R)	C2:Carbamidomethylation:1000.00;R4:Methylation(R):44.14	VC(+57.02)GR(+14.02)GGGGSFGYSYGGGSGGGFSASSLGGGFGGGSR - P35527
C(+57.02)GLVIGR(+14.02)GGENVK	57.79	1371.73	13	0.3	686.872	28.39	539000	1	6000	1	Q92945	Carbamidomethylation; Methylation(R)	C1:Carbamidomethylation:1000.00;R7:Methylation(R):1000.00	C(+57.02)GLVIGR(+14.02)GGENVK - Q92945
EIQDVTIISAC(+57.02)APPGGGR(+14.02)NPVTPRFIR	21.7	2934.55	27	-0.3	979.19	50.39	0	1	16870	0	Q9C0G6	Carbamidomethylation; Methylation(R)	C11:Carbamidomethylation:1000.00;R18:Methylation(R):0.00	EIQDVTIISAC(+57.02)APPGGGR(+14.02)NPVTPRFIR - Q9C0G6
SISLTRPGSSSLSSGPNSILC(+57.02)R(+14.02)	39.75	2289.17	22	2	764.067	38.56	37300	1	11145	1	Q9HB19	Carbamidomethylation; Methylation(R)	C21:Carbamidomethylation:1000.00;R22:Methylation(R):66.02	SISLTRPGSSSLSSGPNSILC(+57.02)R(+14.02) - Q9HB19
FNPGELR(+14.02)	22.83	845.439	7	0.3	423.727	31.89	115000	1	7722	1	O14776	Methylation(R)	R7:Methylation(R):1000.00	FNPGELR(+14.02) - O14776
ASR(+14.02)GGGNHQNNYQPY	33.59	1675.75	15	0.7	559.589	24.81	122000	1	4268	1	O14979	Methylation(R)	R3:Methylation(R):1000.00	ASR(+14.02)GGGNHQNNYQPY - O14979
TQGR(+14.02)GGPASVPSSSPGTSVK	56.89	1869.95	20	1.2	624.326	25.29	7040000	1	4591	1	O43237	Methylation(R)	R4:Methylation(R):1000.00	TQGR(+14.02)GGPASVPSSSPGTSVK - O43237
GR(+14.02)GFTPVVDDPVTER	77.09	1657.84	15	1.5	553.622	34.37	2730000	1	8892	2	O76041	Methylation(R)	R2:Methylation(R):112.98	GR(+14.02)GFTPVVDDPVTER - O76041
GR(+14.02)GAANDSTQFTVAGR	57.2	1620.8	16	0.8	541.273	27.32	258000	1	5492	1	O95425	Methylation(R)	R2:Methylation(R):101.96	GR(+14.02)GAANDSTQFTVAGR - O95425
R(+14.02)PFFPFHSPSR	44.64	1387.71	11	0.9	463.579	35.06	173000	1	9269	1	P02511	Methylation(R)	R1:Methylation(R):80.30	R(+14.02)PFFPFHSPSR - P02511
GR(+14.02)GLSLSR	27.01	858.504	8	0.9	430.259	25.36	794000	1	4648	1	P02686	Methylation(R)	R2:Methylation(R):101.67	GR(+14.02)GLSLSR - P02686
SISISVAR(+14.02)GGGR	34.12	1172.66	12	1.1	587.339	28.06	362000	1	5785	1	P04264	Methylation(R)	R8:Methylation(R):38.03	SISISVAR(+14.02)GGGR - P04264
SISISVARGGGR(+14.02)	31.34	1172.66	12	1.1	587.339	28.06	362000	1	6087	1	P04264	Methylation(R)	R12:Methylation(R):0.00	SISISVARGGGR(+14.02) - P04264
GSGGGSSGGSIGGR(+14.02)GSSSGGVK	24.73	1764.84	22	1.2	589.286	24.5	36300	1	4012	1	P04264	Methylation(R)	R14:Methylation(R):1000.00	GSGGGSSGGSIGGR(+14.02)GSSSGGVK - P04264
GGSGGGGGGSSGGR(+14.02)GSGGGSSGGSIGGR	20.87	2092.92	28	-1	698.648	24.47	155000	1	3986	1	P04264	Methylation(R)	R14:Methylation(R):26.51	GGSGGGGGGSSGGR(+14.02)GSGGGSSGGSIGGR - P04264
YVETPR(+14.02)VHISSVR	23.67	1555.85	13	0.1	389.969	29.79	123000	1	6701	1	P07196	Methylation(R)	R6:Methylation(R):44.44	YVETPR(+14.02)VHISSVR - P07196
SQSWSR(+14.02)GSPSTVSSSYK	63.22	1843.87	17	-0.1	615.631	27.73	486000	1	5687	1	P07197	Methylation(R)	R6:Methylation(R):1000.00	SQSWSR(+14.02)GSPSTVSSSYK - P07197
SSFSRVSGSPSSGFR(+14.02)SQSWSRGSPSTVSSSYK	31.11	3369.6	32	-0.5	843.406	40.38	14600	1	12238	1	P07197	Methylation(R)	R15:Methylation(R):7.40	SSFSRVSGSPSSGFR(+14.02)SQSWSRGSPSTVSSSYK - P07197
SLYASSPGGVYATR(+14.02)	62.07	1441.72	14	0	721.867	34.33	670000	1	8889	1	P08670	Methylation(R)	R14:Methylation(R):1000.00	SLYASSPGGVYATR(+14.02) - P08670
SLYASSPGGVYATR(+14.02)SSAVR	28.44	1941.99	19	0.7	648.338	31.71	732000	1	7632	1	P08670	Methylation(R)	R14:Methylation(R):26.93	SLYASSPGGVYATR(+14.02)SSAVR - P08670
AVQGGGATPVVGAVQGPVPGMPPMTQAPR(+14.02)	27.87	2740.42	29	1.6	914.481	43.85	0	1	14035	0	P09012	Methylation(R)	R29:Methylation(R):1000.00	AVQGGGATPVVGAVQGPVPGMPPMTQAPR(+14.02) - P09012
GGNFGGR(+14.02)SSGPYGGGGQYFAKPR	64.02	2287.09	23	-0.7	572.779	30.87	221000	1	7209	1	P09651	Methylation(R)	R7:Methylation(R):91.80	GGNFGGR(+14.02)SSGPYGGGGQYFAKPR - P09651
SSGPYGGGGQYFAKPR(+14.02)NQGGYGGSSSSSSYGSGR	31.22	3317.47	34	2	830.377	30.18	110000	1	6969	1	P09651	Methylation(R)	R16:Methylation(R):40.70	SSGPYGGGGQYFAKPR(+14.02)NQGGYGGSSSSSSYGSGR - P09651
AGGLLGAGPDPR(+14.02)GGGPMGPGSGPNLR	32.93	2328.18	26	0.6	777.066	37.95	353000	1	10925	1	P0CG12	Methylation(R)	R12:Methylation(R):8.82	AGGLLGAGPDPR(+14.02)GGGPMGPGSGPNLR - P0CG12
FELSGIPPAPR(+14.02)	72.41	1196.66	11	0.7	599.335	40.84	103000000	1	12897	1	P0DMV9:P0DMV8	Methylation(R)	R11:Methylation(R):1000.00	FELSGIPPAPR(+14.02) - P0DMV9:P0DMV8
DNNLLGKFELTGIPPAPR(+14.02)	107.91	1965.07	18	1	656.031	47.09	8020000	1	15518	2	P11142	Methylation(R)	R18:Methylation(R):1000.00	DNNLLGKFELTGIPPAPR(+14.02) - P11142
FELTGIPPAPR(+14.02)	80.96	1210.67	11	0.5	606.343	41.39	77300000	1	13482	3	P11142	Methylation(R)	R11:Methylation(R):1000.00	FELTGIPPAPR(+14.02) - P11142
LSLAR(+14.02)MPPPLPTR	72.26	1461.85	13	1.6	488.291	37.81	19400000	1	10667	1	P14136	Methylation(R)	R5:Methylation(R):131.34	LSLAR(+14.02)MPPPLPTR - P14136
R(+14.02)SYVSSGEMMVGGLAPGR	71.14	1866.91	18	0.6	623.31	37.75	1830000	1	10817	1	P14136	Methylation(R)	R1:Methylation(R):110.48	R(+14.02)SYVSSGEMMVGGLAPGR - P14136
SYVSSGEMMVGGLAPGR(+14.02)R	36.27	1866.91	18	0.6	623.31	37.75	3380000	1	11010	2	P14136	Methylation(R)	R17:Methylation(R):12.28	SYVSSGEMMVGGLAPGR(+14.02)R - P14136
R(+14.02)SYVSSGEMMVGGLAPGRR	35.61	2023.01	19	0.5	675.344	35.46	360000	1	9471	1	P14136	Methylation(R)	R1:Methylation(R):24.85	R(+14.02)SYVSSGEMMVGGLAPGRR - P14136
R(+14.02)GGFNTFR	47.98	967.499	8	1	484.757	27.47	406000	1	5688	1	P17844	Methylation(R)	R1:Methylation(R):89.21	R(+14.02)GGFNTFR - P17844
MGSR(+14.02)AGGPTTPLSPTR	34.17	1598.82	16	-0.5	533.947	27.54	109000	1	5606	1	P20700	Methylation(R)	R4:Methylation(R):100.30	MGSR(+14.02)AGGPTTPLSPTR - P20700
GGNFGFGDSR(+14.02)GGGGNFGPGPGSNFR	75.05	2385.06	25	0.8	796.029	38.23	8900000	1	11121	2	P22626	Methylation(R)	R10:Methylation(R):94.92	GGNFGFGDSR(+14.02)GGGGNFGPGPGSNFR - P22626
SGR(+14.02)GGNFGFGDSR	62.54	1326.61	13	1.4	443.21	28.44	13900000	1	6144	2	P22626	Methylation(R)	R3:Methylation(R):103.28	SGR(+14.02)GGNFGFGDSR - P22626
GGSDGYGSGR(+14.02)GFGDGYNGYGGGPGGGNFGGSPGYGGGR	57.38	3401.41	38	0.4	1134.81	37.3	1500000	1	10440	1	P22626	Methylation(R)	R10:Methylation(R):70.33	GGSDGYGSGR(+14.02)GFGDGYNGYGGGPGGGNFGGSPGYGGGR - P22626
SGRGGNFGFGDSR(+14.02)GGGGNFGPGPGSNFR	52.16	2685.22	28	1.1	672.312	35.55	2170000	1	9541	1	P22626	Methylation(R)	R13:Methylation(R):13.58	SGRGGNFGFGDSR(+14.02)GGGGNFGPGPGSNFR - P22626
SGNFGGSR(+14.02)NMGGPYGGGNYGPGGSGGSGGYGGR	49.27	2965.25	33	0.7	989.426	32.45	172000	1	7994	1	P22626	Methylation(R)	R8:Methylation(R):18.67	SGNFGGSR(+14.02)NMGGPYGGGNYGPGGSGGSGGYGGR - P22626
SGR(+14.02)GGNFGFGDSR(+14.02)GGGGNFGPGPGSNFR	48.66	2699.23	28	1.3	675.817	35.65	1000000	1	9598	1	P22626	Methylation(R)	R3:Methylation(R):51.87;R13:Methylation(R):35.22	SGR(+14.02)GGNFGFGDSR(+14.02)GGGGNFGPGPGSNFR - P22626
SGRGGNFGFGDSRGGGGNFGPGPGSNFR(+14.02)GGSDGYGSGR	37.32	3578.58	38	-0.1	716.723	34.75	11500000	1	9238	1	P22626	Methylation(R)	R28:Methylation(R):1.05	SGRGGNFGFGDSRGGGGNFGPGPGSNFR(+14.02)GGSDGYGSGR - P22626
SGRGGNFGFGDSR(+14.02)GGGGNFGPGPGSNFRGGSDGYGSGR	32.9	3578.58	38	-0.6	895.652	34.76	14900000	1	9432	2	P22626	Methylation(R)	R13:Methylation(R):1.51	SGRGGNFGFGDSR(+14.02)GGGGNFGPGPGSNFRGGSDGYGSGR - P22626
GGGGNFGPGPGSNFR(+14.02)GGSDGYGSGR	32.87	2284	25	-0.4	762.341	31.17	2560000	1	7344	2	P22626	Methylation(R)	R15:Methylation(R):16.78	GGGGNFGPGPGSNFR(+14.02)GGSDGYGSGR - P22626
GGNFGFGDSR(+14.02)GGGGNFGPGPGSNFRGGSDGYGSGR	32.68	3278.43	35	-0.2	820.614	36.27	4160000	1	10286	1	P22626	Methylation(R)	R10:Methylation(R):4.22	GGNFGFGDSR(+14.02)GGGGNFGPGPGSNFRGGSDGYGSGR - P22626
GGGGNFGPGPGSNFR(+14.02)GGSDGYGSGR(+14.02)	30.55	2298.02	25	-0.4	767.012	31.45	19700	1	7573	1	P22626	Methylation(R)	R15:Methylation(R):1000.00;R25:Methylation(R):1000.00	GGGGNFGPGPGSNFR(+14.02)GGSDGYGSGR(+14.02) - P22626
GGNFGFGDSR(+14.02)GGGGNFGPGPGSNFR(+14.02)GGSDGYGSGR	27.12	3292.44	35	-0.2	824.118	36.45	243000	1	10020	1	P22626	Methylation(R)	R10:Methylation(R):13.10;R25:Methylation(R):13.58	GGNFGFGDSR(+14.02)GGGGNFGPGPGSNFR(+14.02)GGSDGYGSGR - P22626
GFGDGYNGYGGGPGGGNFGGSPGYGGGR(+14.02)	24.17	2508.05	28	0.1	837.023	39.91	138000	1	11912	1	P22626	Methylation(R)	R28:Methylation(R):1000.00	GFGDGYNGYGGGPGGGNFGGSPGYGGGR(+14.02) - P22626
NMGGPYGGGNYGPGGSGGSGGYGGR(+14.02)SR	23.08	2446.05	27	0.2	816.356	29.66	437000	1	6613	1	P22626	Methylation(R)	R25:Methylation(R):13.67	NMGGPYGGGNYGPGGSGGSGGYGGR(+14.02)SR - P22626
NMGGPYGGGNYGPGGSGGSGGYGGR(+14.02)	22.61	2202.91	25	-0.1	735.312	33.37	5740	1	8484	1	P22626	Methylation(R)	R25:Methylation(R):1000.00	NMGGPYGGGNYGPGGSGGSGGYGGR(+14.02) - P22626
FGQGGAGPVGGQGPR(+14.02)	59.61	1354.67	15	0	678.344	28.39	189000	1	6007	1	P23246	Methylation(R)	R15:Methylation(R):1000.00	FGQGGAGPVGGQGPR(+14.02) - P23246
GMGPGTPAGYGR(+14.02)GR	40.51	1346.65	14	1.1	449.892	25.92	2680000	1	4887	1	P23246	Methylation(R)	R12:Methylation(R):0.00	GMGPGTPAGYGR(+14.02)GR - P23246
FGQGGAGPVGGQGPR(+14.02)GMGPGTPAGYGR	36.63	2456.18	27	1.1	819.734	32.99	153000	1	8278	1	P23246	Methylation(R)	R15:Methylation(R):19.27	FGQGGAGPVGGQGPR(+14.02)GMGPGTPAGYGR - P23246
GMGPGTPAGYGR(+14.02)GREEYEGPNKKPR	31.05	2674.3	25	0.8	535.868	28.25	3500000	1	6048	1	P23246	Methylation(R)	R12:Methylation(R):0.00	GMGPGTPAGYGR(+14.02)GREEYEGPNKKPR - P23246
GMGPGTPAGYGR(+14.02)	22.18	1133.53	12	1.3	567.772	29.27	271000	1	6430	1	P23246	Methylation(R)	R12:Methylation(R):1000.00	GMGPGTPAGYGR(+14.02) - P23246
RAVLSPGSVFSPGR(+14.02)GASFLFPPAESLSPEEPR	33.67	3354.74	32	-0.2	839.691	47.98	55800	1	15858	1	P27987	Methylation(R)	R14:Methylation(R):0.35	RAVLSPGSVFSPGR(+14.02)GASFLFPPAESLSPEEPR - P27987
R(+14.02)GAYGGGYGGYDDYNGYNDGYGFGSDR	74.45	2886.15	27	0.5	963.059	38.73	1480000	1	11390	1	P31943	Methylation(R)	R1:Methylation(R):112.30	R(+14.02)GAYGGGYGGYDDYNGYNDGYGFGSDR - P31943
GMDTRGPVPGPR(+14.02)GPIPSGMQGPSPINMGAVVPQGSR	50.83	3567.79	36	0.5	892.954	41.24	229000	1	12648	1	P33240	Methylation(R)	R12:Methylation(R):1.34	GMDTRGPVPGPR(+14.02)GPIPSGMQGPSPINMGAVVPQGSR - P33240
GPPLDGRGGR(+14.02)DPRGIDAR	25.16	1874.98	18	0.9	469.753	26.56	1450000	1	5238	1	P33240	Methylation(R)	R10:Methylation(R):0.00	GPPLDGRGGR(+14.02)DPRGIDAR - P33240
GSR(+14.02)GGSGGSYGGGGSGGGYGGGSGSR	83.38	2104.89	26	0.5	702.638	24.56	57100	1	4063	1	P35527	Methylation(R)	R3:Methylation(R):136.25	GSR(+14.02)GGSGGSYGGGGSGGGYGGGSGSR - P35527
GGSGGSYGRGSR(+14.02)GGSGGSYGGGGSGGGYGGGSGSR	32.83	2883.23	35	-0.2	721.814	24.69	12400	1	4187	1	P35527	Methylation(R)	R12:Methylation(R):5.08	GGSGGSYGRGSR(+14.02)GGSGGSYGGGGSGGGYGGGSGSR - P35527
R(+14.02)GGPISFSSSR	27.1	1163.6	11	0.6	582.81	27.6	58100	1	5641	1	P35580	Methylation(R)	R1:Methylation(R):31.03	R(+14.02)GGPISFSSSR - P35580
NVIGLQMGTNR(+14.02)GASQAGMTGYGMPR	36.95	2580.24	25	0.8	861.087	39.13	88700	1	11491	1	P37802	Methylation(R)	R11:Methylation(R):18.18	NVIGLQMGTNR(+14.02)GASQAGMTGYGMPR - P37802
GASQAGMTGYGMPR(+14.02)QIL	36.39	1750.85	17	1	876.433	41.37	105000	1	12686	1	P37802	Methylation(R)	R14:Methylation(R):1000.00	GASQAGMTGYGMPR(+14.02)QIL - P37802
GPPSR(+14.02)GGHMDDGGYSMNFNMSSSR	46.74	2557.05	24	0.5	640.271	33.46	317000	1	8529	1	P38159	Methylation(R)	R5:Methylation(R):70.17	GPPSR(+14.02)GGHMDDGGYSMNFNMSSSR - P38159
SAPPTR(+14.02)GPPPSYGGSSR	40.26	1683.83	17	1	562.285	25	200000	1	4405	1	P38159	Methylation(R)	R6:Methylation(R):55.92	SAPPTR(+14.02)GPPPSYGGSSR - P38159
VGDTSLDPNDFDFTVTGR(+14.02)GSPSR	32.6	2453.15	23	1.1	818.723	42.24	626000	1	13116	1	P51608	Methylation(R)	R18:Methylation(R):6.71	VGDTSLDPNDFDFTVTGR(+14.02)GSPSR - P51608
GGSFGGR(+14.02)SSGSPYGGGYGSGGGSGGYGSR	55.42	2542.09	29	0.5	848.37	29.48	220000	1	6530	1	P51991	Methylation(R)	R7:Methylation(R):50.73	GGSFGGR(+14.02)SSGSPYGGGYGSGGGSGGYGSR - P51991
SSGSPYGGGYGSGGGSGGYGSRR(+14.02)	23.56	2079.9	23	0.1	694.307	26.29	44300	1	5127	1	P51991	Methylation(R)	R23:Methylation(R):0.00	SSGSPYGGGYGSGGGSGGYGSRR(+14.02) - P51991
MGAGMGFGLER(+14.02)	27.6	1138.53	11	1.2	570.271	39.61	142000	1	11744	1	P52272	Methylation(R)	R11:Methylation(R):1000.00	MGAGMGFGLER(+14.02) - P52272
FDLTGIPPAPR(+14.02)	68.95	1196.66	11	0.7	599.335	40.84	103000000	1	13852	1	P54652:P34931	Methylation(R)	R11:Methylation(R):1000.00	FDLTGIPPAPR(+14.02) - P54652:P34931
R(+14.02)GAYGGGYGGYDDYGGYNDGYGFGSDR	66.45	2829.13	27	0.6	944.052	39.13	2480000	1	11636	1	P55795	Methylation(R)	R1:Methylation(R):139.40	R(+14.02)GAYGGGYGGYDDYGGYNDGYGFGSDR - P55795
NLPLPPPPPPR(+14.02)GGDLMAYDR	20.75	2186.13	20	-0.4	729.717	41.07	1450000	1	12655	1	P61978	Methylation(R)	R11:Methylation(R):20.18	NLPLPPPPPPR(+14.02)GGDLMAYDR - P61978
SYR(+14.02)GGGGGGGGWR	35.48	1236.57	13	0.7	413.199	24.81	152000	1	4320	1	P62995	Methylation(R)	R3:Methylation(R):72.22	SYR(+14.02)GGGGGGGGWR - P62995
GMPPPLR(+14.02)GGPGGPGGPGGPMGR	65.75	1968.98	22	1.9	657.334	33.52	16500000	1	8555	1	Q01844	Methylation(R)	R7:Methylation(R):132.31	GMPPPLR(+14.02)GGPGGPGGPGGPMGR - Q01844
RGGPPGPPISR(+14.02)	58.26	1103.62	11	1.5	368.881	25.66	44600	1	4804	1	Q04637	Methylation(R)	R11:Methylation(R):62.68	RGGPPGPPISR(+14.02) - Q04637
GPPR(+14.02)GGPGGELPR	44.19	1259.67	13	-0.1	420.898	25.76	267000	1	4818	1	Q04637	Methylation(R)	R4:Methylation(R):74.48	GPPR(+14.02)GGPGGELPR - Q04637
GGPPGPPISR(+14.02)	41.65	947.519	10	0.2	474.767	28.59	216000	1	6068	1	Q04637	Methylation(R)	R10:Methylation(R):1000.00	GGPPGPPISR(+14.02) - Q04637
TTLSTR(+14.02)GPPRGGPGGELPRGPAGLGPR	30.79	2624.43	27	1.3	525.893	33.07	71900	1	8395	1	Q04637	Methylation(R)	R6:Methylation(R):0.00	TTLSTR(+14.02)GPPRGGPGGELPRGPAGLGPR - Q04637
GATVTR(+14.02)GVPPPPTVR	48.68	1517.87	15	0	506.963	28.98	312000	1	6288	1	Q07666	Methylation(R)	R6:Methylation(R):90.01	GATVTR(+14.02)GVPPPPTVR - Q07666
GVPPPPTVR(+14.02)	36.49	932.544	9	-0.3	467.279	28.72	42300	1	6217	1	Q07666	Methylation(R)	R9:Methylation(R):1000.00	GVPPPPTVR(+14.02) - Q07666
GAAPPPPPVPR(+14.02)	26.37	1068.61	11	0.8	535.312	29.71	22700	1	6668	1	Q07666	Methylation(R)	R11:Methylation(R):1000.00	GAAPPPPPVPR(+14.02) - Q07666
VEFPR(+14.02)SGRGTGRGGGGGGGGGAPR	28.92	2169.09	24	0.3	434.825	25.72	1110000	1	4978	2	Q07955	Methylation(R)	R5:Methylation(R):12.33	VEFPR(+14.02)SGRGTGRGGGGGGGGGAPR - Q07955
VEFPR(+14.02)SGR(+14.02)GTGR(+14.02)GGGGGGGGGAPR	28.5	2197.12	24	0.9	440.432	26.11	164000	1	4963	1	Q07955	Methylation(R)	R5:Methylation(R):47.77;R8:Methylation(R):63.73;R12:Methylation(R):60.67	VEFPR(+14.02)SGR(+14.02)GTGR(+14.02)GGGGGGGGGAPR - Q07955
SGRGTGR(+14.02)GGGGGGGGGAPRGR	26.75	1753.88	21	-0.4	439.477	24.47	54000	1	3959	1	Q07955	Methylation(R)	R7:Methylation(R):0.00	SGRGTGR(+14.02)GGGGGGGGGAPRGR - Q07955
RAPVPVR(+14.02)GGPK	47.31	1146.7	11	0.7	383.24	24.53	148000	1	4029	1	Q12906	Methylation(R)	R7:Methylation(R):86.11	RAPVPVR(+14.02)GGPK - Q12906
GPGGPR(+14.02)GGLGGGMR	42.4	1238.63	14	1.2	413.885	25.35	101000	1	4666	1	Q13283	Methylation(R)	R6:Methylation(R):49.35	GPGGPR(+14.02)GGLGGGMR - Q13283
FWEVISDEHGIDPTGSYHGDSDLQLER(+14.02)	20.53	3115.42	27	-0.1	779.861	43.88	0	1	14045	0	Q13885:Q9BVA1	Methylation(R)	R27:Methylation(R):1000.00	FWEVISDEHGIDPTGSYHGDSDLQLER(+14.02) - Q13885:Q9BVA1
EQYQQQQQWGSR(+14.02)	29.67	1578.72	12	-0.4	790.366	28.79	310000	1	6180	1	Q14103	Methylation(R)	R12:Methylation(R):1000.00	EQYQQQQQWGSR(+14.02) - Q14103
LSEGR(+14.02)GLPPPPR	42.44	1288.73	12	0	430.582	27.65	273000	1	5623	1	Q14151	Methylation(R)	R5:Methylation(R):61.82	LSEGR(+14.02)GLPPPPR - Q14151
EKPPITVVGDVGGR(+14.02)	21.66	1436.8	14	1.2	479.941	34.54	64600	1	8990	1	Q14558	Methylation(R)	R14:Methylation(R):1000.00	EKPPITVVGDVGGR(+14.02) - Q14558
KAPGGPMLLPQTYGAR(+14.02)GK	30.39	1855.01	18	1.3	619.346	32.4	22400	1	8023	1	Q15020	Methylation(R)	R16:Methylation(R):1000.00	KAPGGPMLLPQTYGAR(+14.02)GK - Q15020
MSEGR(+14.02)GLPPPPR	34.58	1306.68	12	0.5	436.568	27.02	166000	1	5381	1	Q15424	Methylation(R)	R5:Methylation(R):71.72	MSEGR(+14.02)GLPPPPR - Q15424
IVAPPGGR(+14.02)ANITSLG	42.62	1435.81	15	-0.3	718.914	36.63	1380000	1	10072	1	Q16555	Methylation(R)	R8:Methylation(R):1000.00	IVAPPGGR(+14.02)ANITSLG - Q16555
KPNAGGSPAPVR(+14.02)	20.56	1163.64	12	-0.5	582.827	27.45	16900	1	5613	1	Q3KQU3	Methylation(R)	R12:Methylation(R):1000.00	KPNAGGSPAPVR(+14.02) - Q3KQU3
STNVTVAAAR(+14.02)GIK	31.13	1300.75	13	0	434.589	27.19	309000	1	5510	2	Q5BKZ1	Methylation(R)	R10:Methylation(R):1000.00	STNVTVAAAR(+14.02)GIK - Q5BKZ1
SR(+14.02)GRVPELPEKGSR	23.03	1580.87	14	0.1	396.226	26.18	103000	1	5071	1	Q5T200	Methylation(R)	R2:Methylation(R):8.22	SR(+14.02)GRVPELPEKGSR - Q5T200
EGTR(+14.02)GSSWSAQNTPR	41.55	1646.78	15	1.3	549.933	25.26	12700	1	4619	1	Q69YN4	Methylation(R)	R4:Methylation(R):71.87	EGTR(+14.02)GSSWSAQNTPR - Q69YN4
GAR(+14.02)PSAAGGGGGGAEPPERAGPGR(+14.02)PR	22.45	2369.21	26	0.9	593.309	40.5	30000	1	12233	1	Q7Z5N4	Methylation(R)	R3:Methylation(R):0.00;R24:Methylation(R):0.00	GAR(+14.02)PSAAGGGGGGAEPPERAGPGR(+14.02)PR - Q7Z5N4
RPAQSVNR(+14.02)GGMTR	33.1	1442.75	13	0.7	481.925	24.48	135000	1	3993	1	Q86V81	Methylation(R)	R8:Methylation(R):23.70	RPAQSVNR(+14.02)GGMTR - Q86V81
SR(+14.02)SISGASSGLSTSPLSSPR	79.62	1947	20	0.1	650.008	31.59	0	1	7626	0	Q8IWQ3	Methylation(R)	R2:Methylation(R):139.39	SR(+14.02)SISGASSGLSTSPLSSPR - Q8IWQ3
AAPAAAAR(+14.02)GAPVAAAALAR	47.69	1659.95	19	1.3	554.326	32.01	79300	1	7791	1	Q8N6I1	Methylation(R)	R8:Methylation(R):73.19	AAPAAAAR(+14.02)GAPVAAAALAR - Q8N6I1
TAR(+14.02)GGGLSLLPPPPGGK	21.29	1587.91	17	0.9	530.311	35.72	66000	1	9744	1	Q8NC96	Methylation(R)	R3:Methylation(R):1000.00	TAR(+14.02)GGGLSLLPPPPGGK - Q8NC96
SSSMSVTGGRGGPR(+14.02)PVSSSIDPSLLSTK	34.94	2760.41	28	1.6	921.144	35.72	0	1	9682	0	Q8NEY1	Methylation(R)	R14:Methylation(R):0.00	SSSMSVTGGRGGPR(+14.02)PVSSSIDPSLLSTK - Q8NEY1
NKR(+14.02)RNFGQIVSDVGR	21.41	1758.96	15	1.1	587.328	48.4	0	1	16039	0	Q8NH94	Methylation(R)	R3:Methylation(R):12.28	NKR(+14.02)RNFGQIVSDVGR - Q8NH94
SR(+14.02)SVSGASTGLSSSPLSSPR	88.89	1932.99	20	-0.1	645.336	30.13	96100	1	6866	1	Q8TDC3	Methylation(R)	R2:Methylation(R):218.75	SR(+14.02)SVSGASTGLSSSPLSSPR - Q8TDC3
GGGAGEQPPPPSAR(+14.02)	23.57	1290.63	14	1.1	646.324	24.81	2150	1	4291	1	Q8TDC3	Methylation(R)	R14:Methylation(R):1000.00	GGGAGEQPPPPSAR(+14.02) - Q8TDC3
TGSETPQAPMSGVGPVSGGPGGFGR(+14.02)GSQGGNFEGPNKR	41.74	3628.71	38	0.3	908.184	35.18	6360000	1	9320	1	Q8WXF1	Methylation(R)	R25:Methylation(R):14.10	TGSETPQAPMSGVGPVSGGPGGFGR(+14.02)GSQGGNFEGPNKR - Q8WXF1
TGSETPQAPMSGVGPVSGGPGGFGR(+14.02)GSQGGNFEGPNK	37.72	3472.61	37	-0.3	1158.54	37.42	616000	1	10533	2	Q8WXF1	Methylation(R)	R25:Methylation(R):1000.00	TGSETPQAPMSGVGPVSGGPGGFGR(+14.02)GSQGGNFEGPNK - Q8WXF1
TGSETPQAPMSGVGPVSGGPGGFGR(+14.02)GSQGGNFEGPNKRR	30.62	3784.81	39	0.9	757.97	34.11	4510000	1	8782	1	Q8WXF1	Methylation(R)	R25:Methylation(R):1.84	TGSETPQAPMSGVGPVSGGPGGFGR(+14.02)GSQGGNFEGPNKRR - Q8WXF1
R(+14.02)GGMIVDPLR	27.17	1126.63	10	1.1	564.322	34.14	198000	1	8842	1	Q92530	Methylation(R)	R1:Methylation(R):45.63	R(+14.02)GGMIVDPLR - Q92530
NR(+14.02)PPFGQGYTQPGPGYR	83.93	1904.93	17	0.4	635.984	31.78	1170000	1	7659	1	Q92734	Methylation(R)	R2:Methylation(R):149.42	NR(+14.02)PPFGQGYTQPGPGYR - Q92734
NR(+14.02)PPFGQGYTQPGPGYR(+14.02)	74.35	1918.94	17	0.9	640.656	32.02	606000	1	7916	1	Q92734	Methylation(R)	R2:Methylation(R):1000.00;R17:Methylation(R):1000.00	NR(+14.02)PPFGQGYTQPGPGYR(+14.02) - Q92734
SSQSSSQQFSGIGR(+14.02)	36.46	1468.69	14	0.6	735.353	29.62	230000	1	6572	1	Q92841	Methylation(R)	R14:Methylation(R):1000.00	SSQSSSQQFSGIGR(+14.02) - Q92841
LGAPQQPGPGPPPSR(+14.02)	25.27	1468.78	15	0.1	735.397	35.55	0	1	9591	0	Q96CX2	Methylation(R)	R15:Methylation(R):1000.00	LGAPQQPGPGPPPSR(+14.02) - Q96CX2
EVMFPPGTR(+14.02)	30.02	1046.52	9	0.7	524.269	35.43	289000	1	9725	1	Q96DH6	Methylation(R)	R9:Methylation(R):1000.00	EVMFPPGTR(+14.02) - Q96DH6
SREVSGFR(+14.02)GGGGGPAYGPPPSLHAR	33.89	2479.25	25	0.4	620.819	31.67	64600	1	7611	1	Q96T58	Methylation(R)	R8:Methylation(R):0.00	SREVSGFR(+14.02)GGGGGPAYGPPPSLHAR - Q96T58
GAPGGR(+14.02)GAQLSVPSPAR	28.7	1590.86	17	0.4	531.294	29.13	49500	1	6372	1	Q99501	Methylation(R)	R6:Methylation(R):44.44	GAPGGR(+14.02)GAQLSVPSPAR - Q99501
VSAGR(+14.02)GSISSGLEFVSHNPPSEAATPPVAR	48.11	2990.52	30	1.1	748.638	37.5	479000	1	10562	1	Q99700	Methylation(R)	R5:Methylation(R):76.36	VSAGR(+14.02)GSISSGLEFVSHNPPSEAATPPVAR - Q99700
STVDAPTAAGR(+14.02)	22.55	1058.54	11	1	530.276	25.51	20900	1	4755	1	Q99832	Methylation(R)	R11:Methylation(R):1000.00	STVDAPTAAGR(+14.02) - Q99832
TASPINSPAR(+14.02)GTPSPK	22.72	1593.85	16	0.4	532.29	25.45	49000	1	4703	1	Q9BTV5	Methylation(R)	R10:Methylation(R):1000.00	TASPINSPAR(+14.02)GTPSPK - Q9BTV5
GR(+14.02)GYFEHR	22.88	1034.5	8	1.7	345.843	24.71	66700	1	4171	1	Q9BUJ2	Methylation(R)	R2:Methylation(R):70.10	GR(+14.02)GYFEHR - Q9BUJ2
LREFEGR(+14.02)GGPLPQEEKWR	25.35	2197.14	18	1.6	550.293	33.9	159000	1	8682	1	Q9C0J8	Methylation(R)	R7:Methylation(R):0.00	LREFEGR(+14.02)GGPLPQEEKWR - Q9C0J8
LREFEGR(+14.02)GGPLPQEEK	22.23	1854.96	16	0.1	619.327	29.6	132000	1	6639	1	Q9C0J8	Methylation(R)	R7:Methylation(R):0.00	LREFEGR(+14.02)GGPLPQEEK - Q9C0J8
NPASRPPASGRGER(+14.02)APPAKNTSPGPVSSPGR	27.65	3065.59	31	-0.2	614.125	25.66	149000	1	4746	1	Q9H6K5	Methylation(R)	R14:Methylation(R):5.16	NPASRPPASGRGER(+14.02)APPAKNTSPGPVSSPGR - Q9H6K5
EELLSFMGAEEAAPDPAGVGR(+14.02)GGGVAGPPSGGGGQPQWQK	31.91	3861.84	40	-1.5	966.465	45.52	8270	1	14789	1	Q9NRF2	Methylation(R)	R21:Methylation(R):1000.00	EELLSFMGAEEAAPDPAGVGR(+14.02)GGGVAGPPSGGGGQPQWQK - Q9NRF2
SR(+14.02)GFAGLHPIPPQGGK	31.16	1631.89	16	0.4	408.98	31.08	494000	1	7480	2	Q9NX05	Methylation(R)	R2:Methylation(R):1000.00	SR(+14.02)GFAGLHPIPPQGGK - Q9NX05
AMGSMPLPPQGR(+14.02)	22.12	1254.62	12	1.1	628.319	35	127000	1	9263	1	Q9NX05	Methylation(R)	R12:Methylation(R):1000.00	AMGSMPLPPQGR(+14.02) - Q9NX05
SGFGGSGGGR(+14.02)GGASGPGSGSGGPGGPAGR	60.95	2272.03	29	0.4	758.352	25.38	54400	1	4676	1	Q9UKZ1	Methylation(R)	R10:Methylation(R):83.07	SGFGGSGGGR(+14.02)GGASGPGSGSGGPGGPAGR - Q9UKZ1
TPQAPASANLVGPR(+14.02)	48.89	1391.75	14	0.2	696.883	32.25	32600	1	7931	1	Q9UQ35	Methylation(R)	R14:Methylation(R):1000.00	TPQAPASANLVGPR(+14.02) - Q9UQ35
TAVAPSAVNLADPR(+14.02)TPTAPAVNLAGAR	25.92	2614.42	27	-0.7	872.48	39.92	16700	1	11984	1	Q9UQ35	Methylation(R)	R14:Methylation(R):8.39	TAVAPSAVNLADPR(+14.02)TPTAPAVNLAGAR - Q9UQ35
GGSAPEGATYAAPR(+14.02)GSSPK	50.31	1773.86	19	0.8	592.296	25.16	11700	1	4553	1	Q9UQB3	Methylation(R)	R14:Methylation(R):1000.00	GGSAPEGATYAAPR(+14.02)GSSPK - Q9UQB3
GGR(+14.02)AVAPRMGLR	24.94	1253.71	12	0.8	418.912	36.12	5700	1	9892	1	Q9Y3Y2	Methylation(R)	R3:Methylation(R):51.63	GGR(+14.02)AVAPRMGLR - Q9Y3Y2
QGGR(+14.02)GAGATLEHQQEISK	54.24	1879.95	18	1.3	627.658	24.97	76200	1	4371	1	Q9Y5S2	Methylation(R)	R4:Methylation(R):1000.00	QGGR(+14.02)GAGATLEHQQEISK - Q9Y5S2
AR(+14.02)GGC(+57.02)PGGEATLSQPPPR	71.24	1820.9	18	0.5	607.973	26.16	104000	1	5024	1	P20290	Methylation(R); Carbamidomethylation	R2:Methylation(R):103.53;C5:Carbamidomethylation:1000.00	AR(+14.02)GGC(+57.02)PGGEATLSQPPPR - P20290

## Sheet: Pool2_methyl_peptide_ID
Methylated Peptides Identified in 'pool 2'
Peptide	-10lgP	Mass	Length	ppm	m/z	RT	Area	Scan	#Feature	Accession	PTM	AScore	Peptide + Accession
AVVGLSGDASKR(+18.04)	35.29	1176.67	12	-0.2	589.344	29.72	57600	6539	1	Q8N3P4	Methyl:2H(3)13C(1)	R12:Methyl:2H(3)13C(1):1000.00	AVVGLSGDASKR(+18.04) - Q8N3P4
GAAAAAAASGAAGGGGGGAGAGAPGGGR(+18.04)LLLSTSLDAK	26.07	3011.57	38	0.7	753.899	45.91	202000	14822	1	Q68E01	Methyl:2H(3)13C(1)	R28:Methyl:2H(3)13C(1):1000.00	GAAAAAAASGAAGGGGGGAGAGAPGGGR(+18.04)LLLSTSLDAK - Q68E01
MAAPVVAPPGVVVSR(+18.04)	24.01	1466.86	15	0.1	734.435	52.01	181000	17669	1	Q13144	Methyl:2H(3)13C(1)	R15:Methyl:2H(3)13C(1):1000.00	MAAPVVAPPGVVVSR(+18.04) - Q13144
SGR(+18.04)GGNFGFGDSR(+18.04)	23.69	1348.67	13	1.4	450.563	24.67	12100	3917	1	P22626	Methyl:2H(3)13C(1)	R3:Methyl:2H(3)13C(1):1000.00;R13:Methyl:2H(3)13C(1):1000.00	SGR(+18.04)GGNFGFGDSR(+18.04) - P22626
SVSDKQSAVTESSEGTVSLLR(+18.04)	21.62	2197.13	21	0.7	733.386	51.62	0	17377	0	P54274	Methyl:2H(3)13C(1)	R21:Methyl:2H(3)13C(1):1000.00	SVSDKQSAVTESSEGTVSLLR(+18.04) - P54274
SSPVGGGPR(+18.04)GPAGPALGR(+18.04)	21.33	1624.92	18	1	813.468	42.4	11200	13234	1	Q00587	Methyl:2H(3)13C(1)	R9:Methyl:2H(3)13C(1):1000.00;R18:Methyl:2H(3)13C(1):1000.00	SSPVGGGPR(+18.04)GPAGPALGR(+18.04) - Q00587
DEAR(+18.04)PGGAEAAPSR	21.08	1400.69	14	-1	701.352	30.38	0	6888	0	Q8TAE7	Methyl:2H(3)13C(1)	R4:Methyl:2H(3)13C(1):29.98	DEAR(+18.04)PGGAEAAPSR - Q8TAE7
GLPGDR(+18.04)GPPGFR	20.55	1242.67	12	1.3	415.233	26.95	290000	5217	1	P08572	Methyl:2H(3)13C(1)	R6:Methyl:2H(3)13C(1):15.57	GLPGDR(+18.04)GPPGFR - P08572
FTVETR(+18.04)GAGTGGLGLAVEGPSEAK	19.85	2321.21	24	1.2	774.746	51.6	0	17364	0	P21333	Methyl:2H(3)13C(1)	R6:Methyl:2H(3)13C(1):1000.00	FTVETR(+18.04)GAGTGGLGLAVEGPSEAK - P21333
DNNLLGKFELTGIPPAPR(+14.02)	94.01	1965.07	18	0.8	656.03	47.14	17800000	15437	2	P11142	Methylation(R)	R18:Methylation(R):1000.00	DNNLLGKFELTGIPPAPR(+14.02) - P11142
SGFGGSGGGR(+14.02)GGASGPGSGSGGPGGPAGR	87.17	2272.03	29	0.4	758.352	25.27	67900	4397	1	Q9UKZ1	Methylation(R)	R10:Methylation(R):117.77	SGFGGSGGGR(+14.02)GGASGPGSGSGGPGGPAGR - Q9UKZ1
AGAGR(+14.02)GAPEGPGPSGGAQGGSIHSGR	84.95	2258.09	26	2	565.531	24.72	1190000	3957	1	Q9BYN0	Methylation(R)	R5:Methylation(R):122.62	AGAGR(+14.02)GAPEGPGPSGGAQGGSIHSGR - Q9BYN0
R(+14.02)GAYGGGYGGYDDYNGYNDGYGFGSDR	80.77	2886.15	27	0.5	963.059	38.48	3260000	11224	1	P31943	Methylation(R)	R1:Methylation(R):175.68	R(+14.02)GAYGGGYGGYDDYNGYNDGYGFGSDR - P31943
GR(+14.02)GFTPVVDDPVTER	78	1657.84	15	1.6	553.622	34.14	5130000	8904	1	O76041	Methylation(R)	R2:Methylation(R):144.36	GR(+14.02)GFTPVVDDPVTER - O76041
AR(+14.02)GGC(+57.02)PGGEATLSQPPPR	75.84	1820.9	18	-0.1	607.972	25.84	235000	4753	1	P20290	Methylation(R); Carbamidomethylation	R2:Methylation(R):195.73;C5:Carbamidomethylation:1000.00	AR(+14.02)GGC(+57.02)PGGEATLSQPPPR - P20290
TQGR(+14.02)GGPASVPSSSPGTSVK	75.7	1869.95	20	0.8	624.326	25.17	11700000	4318	1	O43237	Methylation(R)	R4:Methylation(R):1000.00	TQGR(+14.02)GGPASVPSSSPGTSVK - O43237
GMPPPLR(+14.02)GGPGGPGGPGGPMGR	74.48	1968.98	22	0	657.333	33.31	16200000	8409	1	Q01844	Methylation(R)	R7:Methylation(R):119.59	GMPPPLR(+14.02)GGPGGPGGPGGPMGR - Q01844
R(+14.02)GAYGGGYGGYDDYGGYNDGYGFGSDR	73.09	2829.13	27	0.4	944.052	38.93	4190000	11425	1	P55795	Methylation(R)	R1:Methylation(R):155.06	R(+14.02)GAYGGGYGGYDDYGGYNDGYGFGSDR - P55795
FELTGIPPAPR(+14.02)	71.67	1210.67	11	0.9	606.343	41.59	66000000	12798	1	P11142	Methylation(R)	R11:Methylation(R):1000.00	FELTGIPPAPR(+14.02) - P11142
GGNFGFGDSR(+14.02)GGGGNFGPGPGSNFR	71.02	2385.06	25	0	796.028	38.07	16000000	10913	2	P22626	Methylation(R)	R10:Methylation(R):93.87	GGNFGFGDSR(+14.02)GGGGNFGPGPGSNFR - P22626
GSR(+14.02)GGSGGSYGGGGSGGGYGGGSGSR	70.55	2104.89	26	1.1	702.638	24.57	39500	3832	1	P35527	Methylation(R)	R3:Methylation(R):95.17	GSR(+14.02)GGSGGSYGGGGSGGGYGGGSGSR - P35527
GGSFGGR(+14.02)SSGSPYGGGYGSGGGSGGYGSR	70.19	2542.09	29	-0.6	848.369	29.35	475000	6265	1	P51991	Methylation(R)	R7:Methylation(R):96.55	GGSFGGR(+14.02)SSGSPYGGGYGSGGGSGGYGSR - P51991
R(+14.02)SYVSSGEMMVGGLAPGR	68.82	1866.91	18	0.7	623.31	37.91	2990000	10540	1	P14136	Methylation(R)	R1:Methylation(R):129.75	R(+14.02)SYVSSGEMMVGGLAPGR - P14136
FELSGIPPAPR(+14.02)	68.21	1196.66	11	0.5	599.335	40.96	127000000	12479	2	P0DMV9:P0DMV8	Methylation(R)	R11:Methylation(R):1000.00	FELSGIPPAPR(+14.02) - P0DMV9:P0DMV8
GNMPQR(+14.02)GGGGGGSGGIGYPYPR	68.13	2104.99	22	-0.2	702.669	30.64	413000	6958	1	Q00839	Methylation(R)	R6:Methylation(R):78.13	GNMPQR(+14.02)GGGGGGSGGIGYPYPR - Q00839
LSLAR(+14.02)MPPPLPTR	66.35	1461.85	13	1.4	488.291	37.6	44500000	10482	2	P14136	Methylation(R)	R5:Methylation(R):113.97	LSLAR(+14.02)MPPPLPTR - P14136
STNVTVAAAR(+14.02)GIK	65.95	1300.75	13	0.2	651.38	26.81	117000	5184	1	Q5BKZ1	Methylation(R)	R10:Methylation(R):1000.00	STNVTVAAAR(+14.02)GIK - Q5BKZ1
GPPR(+14.02)GGPGGELPR	64.42	1259.67	13	-0.7	420.898	25.51	597000	4512	1	Q04637	Methylation(R)	R4:Methylation(R):92.08	GPPR(+14.02)GGPGGELPR - Q04637
NRPPFGQGYTQPGPGYR(+14.02)	63.23	1904.93	17	0.2	635.984	31.47	1450000	7481	1	Q92734	Methylation(R)	R17:Methylation(R):63.78	NRPPFGQGYTQPGPGYR(+14.02) - Q92734
SGR(+14.02)GGNFGFGDSR	61.68	1326.61	13	0.4	443.21	28.06	32300000	5954	2	P22626	Methylation(R)	R3:Methylation(R):85.70	SGR(+14.02)GGNFGFGDSR - P22626
FDLTGIPPAPR(+14.02)	61.46	1196.66	11	0.5	599.335	40.96	127000000	13533	1	P34931:P54652	Methylation(R)	R11:Methylation(R):1000.00	FDLTGIPPAPR(+14.02) - P34931:P54652
NR(+14.02)PPFGQGYTQPGPGYR	61.45	1904.93	17	0.2	635.984	31.47	1450000	7308	1	Q92734	Methylation(R)	R2:Methylation(R):133.36	NR(+14.02)PPFGQGYTQPGPGYR - Q92734
SGRGGNFGFGDSR(+14.02)GGGGNFGPGPGSNFR	61.19	2685.22	28	0.8	672.312	35.01	2210000	9401	1	P22626	Methylation(R)	R13:Methylation(R):17.73	SGRGGNFGFGDSR(+14.02)GGGGNFGPGPGSNFR - P22626
RGGPPGPPISR(+14.02)	61.03	1103.62	11	0.2	368.881	25.44	80800	4501	1	Q04637	Methylation(R)	R11:Methylation(R):85.84	RGGPPGPPISR(+14.02) - Q04637
SGSGNFGGGR(+14.02)GGGFGGNDNFGR	60.97	2043.89	22	0.3	682.304	31	15800000	7257	1	P09651	Methylation(R)	R10:Methylation(R):70.54	SGSGNFGGGR(+14.02)GGGFGGNDNFGR - P09651
SR(+14.02)SVSGASTGLSSSPLSSPR	60.81	1932.99	20	0.8	645.337	29.91	70900	6588	1	Q8TDC3	Methylation(R)	R2:Methylation(R):101.66	SR(+14.02)SVSGASTGLSSSPLSSPR - Q8TDC3
NR(+14.02)PPFGQGYTQPGPGYR(+14.02)	60.79	1918.94	17	1.1	640.656	31.72	651000	7661	1	Q92734	Methylation(R)	R2:Methylation(R):1000.00;R17:Methylation(R):1000.00	NR(+14.02)PPFGQGYTQPGPGYR(+14.02) - Q92734
FGQGGAGPVGGQGPR(+14.02)	58.81	1354.67	15	-1.5	678.343	28.15	348000	5801	1	P23246	Methylation(R)	R15:Methylation(R):1000.00	FGQGGAGPVGGQGPR(+14.02) - P23246
GR(+14.02)GAANDSTQFTVAGR	58.74	1620.8	16	-0.6	541.273	26.9	400000	5229	1	O95425	Methylation(R)	R2:Methylation(R):125.77	GR(+14.02)GAANDSTQFTVAGR - O95425
GGSDGYGSGR(+14.02)GFGDGYNGYGGGPGGGNFGGSPGYGGGR	58.7	3401.41	38	-0.2	1134.81	37.14	3760000	10469	2	P22626	Methylation(R)	R10:Methylation(R):110.07	GGSDGYGSGR(+14.02)GFGDGYNGYGGGPGGGNFGGSPGYGGGR - P22626
GGNFGGR(+14.02)GGYGGGGGGSR	58.08	1539.69	18	1.1	514.239	24.72	167000	3960	1	P51991	Methylation(R)	R7:Methylation(R):81.20	GGNFGGR(+14.02)GGYGGGGGGSR - P51991
QGGR(+14.02)GAGATLEHQQEISK	56.48	1879.95	18	1.4	627.658	24.83	107000	4063	1	Q9Y5S2	Methylation(R)	R4:Methylation(R):1000.00	QGGR(+14.02)GAGATLEHQQEISK - Q9Y5S2
SGNFGGSR(+14.02)NMGGPYGGGNYGPGGSGGSGGYGGR	56.18	2965.25	33	1	989.427	32.2	110000	7828	1	P22626	Methylation(R)	R8:Methylation(R):51.69	SGNFGGSR(+14.02)NMGGPYGGGNYGPGGSGGSGGYGGR - P22626
VSAGR(+14.02)GSISSGLEFVSHNPPSEAATPPVAR	54.23	2990.52	30	-0.1	748.638	37.03	527000	10293	1	Q99700	Methylation(R)	R5:Methylation(R):84.39	VSAGR(+14.02)GSISSGLEFVSHNPPSEAATPPVAR - Q99700
GR(+14.02)GVDLTEPTQPTR	53.98	1539.8	14	1.3	514.275	27.96	315000	5761	1	P20339	Methylation(R)	R2:Methylation(R):68.46	GR(+14.02)GVDLTEPTQPTR - P20339
GR(+14.02)GAAPPPPPVPR	53.75	1281.73	13	0.9	641.873	26.3	60900	4940	1	Q07666	Methylation(R)	R2:Methylation(R):96.48	GR(+14.02)GAAPPPPPVPR - Q07666
C(+57.02)GLVIGR(+14.02)GGENVK	53.26	1371.73	13	-0.8	686.871	28.04	6090000	5702	2	Q92945	Carbamidomethylation; Methylation(R)	C1:Carbamidomethylation:1000.00;R7:Methylation(R):1000.00	C(+57.02)GLVIGR(+14.02)GGENVK - Q92945
SR(+14.02)SISGASSGLSTSPLSSPR	51.55	1947	20	1.7	650.009	31.3	128000	7312	1	Q8IWQ3	Methylation(R)	R2:Methylation(R):98.85	SR(+14.02)SISGASSGLSTSPLSSPR - Q8IWQ3
TAR(+14.02)GGGLSLLPPPPGGK	51.49	1587.91	17	1	530.311	35.53	103000	9564	1	Q8NC96	Methylation(R)	R3:Methylation(R):1000.00	TAR(+14.02)GGGLSLLPPPPGGK - Q8NC96
SAPPTR(+14.02)GPPPSYGGSSR	51.23	1683.83	17	0.7	562.285	24.95	249000	4159	1	P38159	Methylation(R)	R6:Methylation(R):55.61	SAPPTR(+14.02)GPPPSYGGSSR - P38159
SSQSSSQQFSGIGR(+14.02)	51.11	1468.69	14	0.1	735.353	29.45	240000	6372	1	Q92841	Methylation(R)	R14:Methylation(R):1000.00	SSQSSSQQFSGIGR(+14.02) - Q92841
RAVLSPGSVFSPGR(+14.02)GASFLFPPAESLSPEEPR	50.9	3354.74	32	-0.3	839.691	47.27	0	15430	0	P27987	Methylation(R)	R14:Methylation(R):4.25	RAVLSPGSVFSPGR(+14.02)GASFLFPPAESLSPEEPR - P27987
SR(+14.02)GFAGLHPIPPQGGK	50.88	1631.89	16	0.2	544.971	30.12	580000	6736	2	Q9NX05	Methylation(R)	R2:Methylation(R):1000.00	SR(+14.02)GFAGLHPIPPQGGK - Q9NX05
MGMGNNYSGGYGTPDGLGGYGR(+14.02)	50.55	2193.92	22	1.4	1097.97	39.96	108000	11954	1	P31942	Methylation(R)	R22:Methylation(R):1000.00	MGMGNNYSGGYGTPDGLGGYGR(+14.02) - P31942
STVDAPTAAGR(+14.02)	50.31	1058.54	11	0.6	530.275	25.43	28600	4513	1	Q99832	Methylation(R)	R11:Methylation(R):1000.00	STVDAPTAAGR(+14.02) - Q99832
GATVTR(+14.02)GVPPPPTVR	50.13	1517.87	15	0.7	506.964	28.74	436000	6016	1	Q07666	Methylation(R)	R6:Methylation(R):66.45	GATVTR(+14.02)GVPPPPTVR - Q07666
GR(+14.02)GSFGMQVVSVGGPGK	49.28	1632.84	17	0.1	545.288	34.3	29500	8925	1	Q9NX05	Methylation(R)	R2:Methylation(R):1000.00	GR(+14.02)GSFGMQVVSVGGPGK - Q9NX05
SGR(+14.02)GGNFGFGDSR(+14.02)GGGGNFGPGPGSNFR	49.24	2699.23	28	0.5	675.816	35.17	2170000	9316	1	P22626	Methylation(R)	R3:Methylation(R):43.77;R13:Methylation(R):36.33	SGR(+14.02)GGNFGFGDSR(+14.02)GGGGNFGPGPGSNFR - P22626
GGNFGGR(+14.02)SSGPYGGGGQYFAKPR	48.96	2287.09	23	1	572.78	30.19	416000	6739	2	P09651	Methylation(R)	R7:Methylation(R):85.10	GGNFGGR(+14.02)SSGPYGGGGQYFAKPR - P09651
FELSGIPPAPR(+14.02)GVPQIEVTFDIDANGILNVTATDK	48.92	3707.94	35	2.1	1236.99	52.04	0	17670	0	P0DMV9:P0DMV8	Methylation(R)	R11:Methylation(R):1000.00	FELSGIPPAPR(+14.02)GVPQIEVTFDIDANGILNVTATDK - P0DMV9:P0DMV8
GPMTGSSGGDR(+14.02)GGFK	48.85	1423.65	15	0	475.558	25.04	209000	4225	1	Q92804	Methylation(R)	R11:Methylation(R):1000.00	GPMTGSSGGDR(+14.02)GGFK - Q92804
GR(+14.02)GGGSGNFMGR	48.7	1165.54	12	-0.6	389.521	24.82	69100	4061	1	P51991	Methylation(R)	R2:Methylation(R):82.30	GR(+14.02)GGGSGNFMGR - P51991
GPPSR(+14.02)GGHMDDGGYSMNFNMSSSR	47.88	2557.05	24	0.7	640.271	33.04	759000	8263	2	P38159	Methylation(R)	R5:Methylation(R):79.67	GPPSR(+14.02)GGHMDDGGYSMNFNMSSSR - P38159
IVAPPGGR(+14.02)ANITSLG	46.86	1435.81	15	0.4	718.915	36.54	1850000	10154	1	Q16555	Methylation(R)	R8:Methylation(R):1000.00	IVAPPGGR(+14.02)ANITSLG - Q16555
GGGGGR(+14.02)GGLHDFR	44.86	1255.62	13	1.2	419.547	24.78	125000	4017	1	P23246	Methylation(R)	R6:Methylation(R):56.15	GGGGGR(+14.02)GGLHDFR - P23246
EVMFPPGTR(+14.02)	44.16	1046.52	9	0	524.268	35.41	490000	9290	1	Q96DH6	Methylation(R)	R9:Methylation(R):1000.00	EVMFPPGTR(+14.02) - Q96DH6
GGFQNR(+14.02)GGGSGGGGNYR	43.89	1610.73	17	0.5	537.918	24.63	26000	3887	1	Q9BUJ2	Methylation(R)	R6:Methylation(R):53.43	GGFQNR(+14.02)GGGSGGGGNYR - Q9BUJ2
VEFPRSGR(+14.02)GTGRGGGGGGGGGAPR	43.62	2169.09	24	1.4	434.826	24.95	387000	4119	1	Q07955	Methylation(R)	R8:Methylation(R):0.00	VEFPRSGR(+14.02)GTGRGGGGGGGGGAPR - Q07955
GGGGNFGPGPGSNFR(+14.02)GGSDGYGSGR	43.06	2284	25	0.9	762.341	31.76	3970000	7536	2	P22626	Methylation(R)	R15:Methylation(R):21.00	GGGGNFGPGPGSNFR(+14.02)GGSDGYGSGR - P22626
FGQGGAGPVGGQGPR(+14.02)GMGPGTPAGYGR	41.81	2456.18	27	1.1	819.734	32.81	104000	8119	1	P23246	Methylation(R)	R15:Methylation(R):29.09	FGQGGAGPVGGQGPR(+14.02)GMGPGTPAGYGR - P23246
NRPAIAR(+14.02)GAAGGGGR	41.72	1393.77	15	1.1	465.596	24.49	185000	3755	1	Q86V81	Methylation(R)	R7:Methylation(R):9.68	NRPAIAR(+14.02)GAAGGGGR - Q86V81
GGSGGGGGGSSGGR(+14.02)GSGGGSSGGSIGGR	41.61	2092.92	28	0.3	698.649	24.47	0	3733	0	P04264	Methylation(R)	R14:Methylation(R):20.30	GGSGGGGGGSSGGR(+14.02)GSGGGSSGGSIGGR - P04264
GIGR(+14.02)GTVQALHATGAR	40.43	1577.88	16	-0.5	395.476	27.87	197000	5672	1	Q7Z4W1	Methylation(R)	R4:Methylation(R):37.25	GIGR(+14.02)GTVQALHATGAR - Q7Z4W1
RAPVPVR(+14.02)GGPK	40.31	1146.7	11	0.6	383.24	24.53	472000	3779	1	Q12906	Methylation(R)	R7:Methylation(R):97.87	RAPVPVR(+14.02)GGPK - Q12906
GFGR(+14.02)GGAESHTFK	40.12	1363.66	13	0.3	455.562	25.01	269000	4211	1	P50238	Methylation(R)	R4:Methylation(R):1000.00	GFGR(+14.02)GGAESHTFK - P50238
R(+14.02)PFFPFHSPSR	40.1	1387.71	11	0.1	463.579	34.11	191000	8779	1	P02511	Methylation(R)	R1:Methylation(R):62.68	R(+14.02)PFFPFHSPSR - P02511
MGMGNNYSGGYGTPDGLGGYGR(+14.02)GGGGSGGYYGQGGMSGGGWR	39.83	3979.65	42	0.3	995.92	40.91	3620000	12638	2	P31942	Methylation(R)	R22:Methylation(R):47.73	MGMGNNYSGGYGTPDGLGGYGR(+14.02)GGGGSGGYYGQGGMSGGGWR - P31942
SQREPGPGAKEEAAGVSGPAGR(+14.02)GR	39.71	2334.18	24	1	467.844	24.8	92300	4025	1	Q15654	Methylation(R)	R22:Methylation(R):7.32	SQREPGPGAKEEAAGVSGPAGR(+14.02)GR - Q15654
AMGSMPLPPQGR(+14.02)	39.57	1254.62	12	1.2	628.319	34.86	268000	9200	1	Q9NX05	Methylation(R)	R12:Methylation(R):1000.00	AMGSMPLPPQGR(+14.02) - Q9NX05
NLPLPPPPPPR(+14.02)GGDLMAYDR	39.45	2186.13	20	0.1	729.717	40.96	1960000	12588	1	P61978	Methylation(R)	R11:Methylation(R):16.96	NLPLPPPPPPR(+14.02)GGDLMAYDR - P61978
GMGPGTPAGYGR(+14.02)GREEYEGPNKKPR	39.42	2674.3	25	0.2	535.868	26.84	3210000	5133	1	P23246	Methylation(R)	R12:Methylation(R):18.53	GMGPGTPAGYGR(+14.02)GREEYEGPNKKPR - P23246
TGSETPQAPMSGVGPVSGGPGGFGR(+14.02)GSQGGNFEGPNKR	39.14	3628.71	38	0.2	908.184	34.88	6220000	9170	1	Q8WXF1	Methylation(R)	R25:Methylation(R):17.22	TGSETPQAPMSGVGPVSGGPGGFGR(+14.02)GSQGGNFEGPNKR - Q8WXF1
GFGDGYNGYGGGPGGGNFGGSPGYGGGR(+14.02)	38.97	2508.05	28	-0.9	837.023	39.84	154000	11952	1	P22626	Methylation(R)	R28:Methylation(R):1000.00	GFGDGYNGYGGGPGGGNFGGSPGYGGGR(+14.02) - P22626
LPSR(+14.02)PPLPGSGGSQSGAK	38.53	1705.91	18	-0.7	569.644	28.77	86400	6118	1	Q9Y570	Methylation(R)	R4:Methylation(R):1000.00	LPSR(+14.02)PPLPGSGGSQSGAK - Q9Y570
EPSAPSIPTPAYQSSPAGGHAPTPPTPAPR(+14.02)	38.1	2949.46	30	1.2	984.163	36.49	44400	10111	1	Q8WUM4	Methylation(R)	R30:Methylation(R):1000.00	EPSAPSIPTPAYQSSPAGGHAPTPPTPAPR(+14.02) - Q8WUM4
GR(+14.02)GAAPPPPPVPR(+14.02)	38.06	1295.75	13	0.1	432.923	26.67	71700	5136	1	Q07666	Methylation(R)	R2:Methylation(R):1000.00;R13:Methylation(R):1000.00	GR(+14.02)GAAPPPPPVPR(+14.02) - Q07666
EQYQQQQQWGSR(+14.02)	38	1578.72	12	-0.9	790.365	28.59	439000	5981	1	Q14103	Methylation(R)	R12:Methylation(R):1000.00	EQYQQQQQWGSR(+14.02) - Q14103
GMGPGTPAGYGR(+14.02)	37.77	1133.53	12	0.8	567.772	29.14	265000	6193	1	P23246	Methylation(R)	R12:Methylation(R):1000.00	GMGPGTPAGYGR(+14.02) - P23246
GPGGPR(+14.02)GGLGGGMR	37.75	1238.63	14	0.9	413.884	25.16	209000	4334	1	Q13283	Methylation(R)	R6:Methylation(R):63.44	GPGGPR(+14.02)GGLGGGMR - Q13283
RGNMPQR(+14.02)GGGGGGSGGIGYPYPR	37.73	2261.09	23	1.7	566.28	29.01	83000	6172	1	Q00839	Methylation(R)	R7:Methylation(R):0.00	RGNMPQR(+14.02)GGGGGGSGGIGYPYPR - Q00839
R(+14.02)GGFDRPSYDR	36.52	1338.64	11	1.2	447.222	25.01	95200	4200	1	P49750	Methylation(R)	R1:Methylation(R):45.16	R(+14.02)GGFDRPSYDR - P49750
RGASQASGPLPGPHFPLPGR(+14.02)GEVWGPGYR	36.51	3013.54	29	1	754.394	40.6	198000	12311	2	Q15654	Methylation(R)	R20:Methylation(R):8.95	RGASQASGPLPGPHFPLPGR(+14.02)GEVWGPGYR - Q15654
R(+14.02)GGFNTFR	36.26	967.499	8	0.7	484.757	26.74	693000	5127	1	P17844	Methylation(R)	R1:Methylation(R):80.73	R(+14.02)GGFNTFR - P17844
SSSMSVTGGRGGPR(+14.02)PVSSSIDPSLLSTK	35.95	2760.41	28	0	691.109	35.46	0	9515	0	Q8NEY1	Methylation(R)	R14:Methylation(R):11.12	SSSMSVTGGRGGPR(+14.02)PVSSSIDPSLLSTK - Q8NEY1
HSAYSYC(+57.02)GR(+14.02)GFYPQYGALETR	35.09	2496.13	21	0.6	625.04	36.36	104000	10021	1	Q63ZY3	Carbamidomethylation; Methylation(R)	C7:Carbamidomethylation:1000.00;R9:Methylation(R):57.87	HSAYSYC(+57.02)GR(+14.02)GFYPQYGALETR - Q63ZY3
GGYGGGGSGGGGR(+14.02)GGFPSGGGGGGGQQR	34.93	2265	28	-0.5	756.008	25.19	13600	4375	1	P35637	Methylation(R)	R13:Methylation(R):19.24	GGYGGGGSGGGGR(+14.02)GGFPSGGGGGGGQQR - P35637
GGVAGR(+14.02)GGFAQGGHSQGHVVPGGGLEGGGVASQDR	34.61	3185.55	35	0.1	797.394	30.17	233000	6836	2	Q14151	Methylation(R)	R6:Methylation(R):39.75	GGVAGR(+14.02)GGFAQGGHSQGHVVPGGGLEGGGVASQDR - Q14151
MSGR(+14.02)GVGSVSQFK	34.32	1352.69	13	0.8	451.903	27.48	208000	5472	1	Q5T5U3	Methylation(R)	R4:Methylation(R):1000.00	MSGR(+14.02)GVGSVSQFK - Q5T5U3
EELLSFMGAEEAAPDPAGVGR(+14.02)GGGVAGPPSGGGGQPQWQK	34.14	3861.84	40	-0.4	1288.29	45.29	0	14593	0	Q9NRF2	Methylation(R)	R21:Methylation(R):1000.00	EELLSFMGAEEAAPDPAGVGR(+14.02)GGGVAGPPSGGGGQPQWQK - Q9NRF2
GSGGGSSGGSIGGR(+14.02)GSSSGGVK	34.12	1764.84	22	1	589.286	24.5	22700	3766	1	P04264	Methylation(R)	R14:Methylation(R):1000.00	GSGGGSSGGSIGGR(+14.02)GSSSGGVK - P04264
GR(+14.02)GAPPPPPSR	33.8	1101.6	11	0.7	368.209	24.52	90400	3794	1	O00401	Methylation(R)	R2:Methylation(R):48.96	GR(+14.02)GAPPPPPSR - O00401
GGFGAR(+14.02)GGGGLPPKK	33.68	1368.76	15	0.9	457.262	24.7	242000	3950	1	Q92841	Methylation(R)	R6:Methylation(R):1000.00	GGFGAR(+14.02)GGGGLPPKK - Q92841
STVDAPTAAGR(+14.02)GR(+14.02)	33.57	1285.67	13	1.1	429.566	24.75	20700	3996	1	Q99832	Methylation(R)	R11:Methylation(R):1000.00;R13:Methylation(R):1000.00	STVDAPTAAGR(+14.02)GR(+14.02) - Q99832
KPLYHYGR(+14.02)	32.44	1046.57	8	1.5	349.863	24.77	41500	4024	1	Q8N4C8	Methylation(R)	R8:Methylation(R):1000.00	KPLYHYGR(+14.02) - Q8N4C8
GMGPGTPAGYGR(+14.02)GR	31.49	1346.65	14	2	449.892	25.67	4290000	4751	1	P23246	Methylation(R)	R12:Methylation(R):7.32	GMGPGTPAGYGR(+14.02)GR - P23246
STNVTVAAAR(+14.02)	31.48	1002.55	10	0.3	502.28	25.58	112000	4589	1	Q5BKZ1	Methylation(R)	R10:Methylation(R):1000.00	STNVTVAAAR(+14.02) - Q5BKZ1
SGRGTGR(+14.02)GGGGGGGGGAPRGR	31.24	1753.88	21	-0.2	439.477	24.33	132000	3639	1	Q07955	Methylation(R)	R7:Methylation(R):0.00	SGRGTGR(+14.02)GGGGGGGGGAPRGR - Q07955
IVAPPGGR(+14.02)SNITSLS	31.16	1481.82	15	1.8	741.919	35.13	126000	9308	1	Q14195	Methylation(R)	R8:Methylation(R):1000.00	IVAPPGGR(+14.02)SNITSLS - Q14195
RPAQSVNR(+14.02)GGMTR	30.98	1442.75	13	0.3	481.925	24.47	412000	3737	1	Q86V81	Methylation(R)	R8:Methylation(R):25.58	RPAQSVNR(+14.02)GGMTR - Q86V81
GGNFGFGDSR(+14.02)GGGGNFGPGPGSNFRGGSDGYGSGR	30.84	3278.43	35	-0.6	820.613	35.99	3930000	9917	1	P22626	Methylation(R)	R10:Methylation(R):0.00	GGNFGFGDSR(+14.02)GGGGNFGPGPGSNFRGGSDGYGSGR - P22626
IGLGGR(+14.02)GGSGGSYGR	30.41	1363.7	15	0.2	455.572	25.89	95100	4776	1	P35527	Methylation(R)	R6:Methylation(R):36.38	IGLGGR(+14.02)GGSGGSYGR - P35527
VGDTSLDPNDFDFTVTGR(+14.02)GSPSR	30.23	2453.15	23	0.2	818.723	42.07	738000	13019	1	P51608	Methylation(R)	R18:Methylation(R):17.91	VGDTSLDPNDFDFTVTGR(+14.02)GSPSR - P51608
R(+14.02)GGHQNSYKPY	30.16	1319.64	11	0.2	440.886	24.55	0	3807	0	Q14103	Methylation(R)	R1:Methylation(R):1000.00	R(+14.02)GGHQNSYKPY - Q14103
SGRGGNFGFGDSR(+14.02)GGGGNFGPGPGSNFRGGSDGYGSGR	30.02	3578.58	38	0.5	716.724	34.14	14200000	9096	2	P22626	Methylation(R)	R13:Methylation(R):1.05	SGRGGNFGFGDSR(+14.02)GGGGNFGPGPGSNFRGGSDGYGSGR - P22626
GR(+14.02)GLSLSR	30	858.504	8	0.7	430.259	25.14	2430000	4304	1	P02686	Methylation(R)	R2:Methylation(R):131.63	GR(+14.02)GLSLSR - P02686
SYVSSGEMMVGGLAPGR(+14.02)R	29.94	1866.91	18	0.7	623.31	37.91	2990000	11131	1	P14136	Methylation(R)	R17:Methylation(R):14.02	SYVSSGEMMVGGLAPGR(+14.02)R - P14136
LSEGR(+14.02)GLPPPPR	29.87	1288.73	12	0.3	430.582	27.27	355000	5374	1	Q14151	Methylation(R)	R5:Methylation(R):83.89	LSEGR(+14.02)GLPPPPR - Q14151
SSGPYGGGGQYFAKPR(+14.02)	29.69	1641.79	16	0.4	548.271	29.67	56700	6593	1	P09651	Methylation(R)	R16:Methylation(R):1000.00	SSGPYGGGGQYFAKPR(+14.02) - P09651
GGMSGR(+14.02)GSFAPGGASR	29.52	1464.69	16	0.8	489.237	25.58	58900	4592	1	Q15424	Methylation(R)	R6:Methylation(R):59.20	GGMSGR(+14.02)GSFAPGGASR - Q15424
R(+14.02)GGHQNNYKPY	29.35	1346.65	11	0.9	449.89	24.53	296000	3793	1	Q99729	Methylation(R)	R1:Methylation(R):1000.00	R(+14.02)GGHQNNYKPY - Q99729
GGYGGDR(+14.02)GGGYGGDR	29.01	1413.6	15	0.5	472.208	24.68	195000	3931	1	Q92804	Methylation(R)	R7:Methylation(R):78.57	GGYGGDR(+14.02)GGGYGGDR - Q92804
VEFPR(+14.02)SGR(+14.02)GTGR(+14.02)GGGGGGGGGAPR	28.75	2197.12	24	0.1	550.288	25.14	342000	4307	2	Q07955	Methylation(R)	R5:Methylation(R):28.18;R8:Methylation(R):26.83;R12:Methylation(R):26.38	VEFPR(+14.02)SGR(+14.02)GTGR(+14.02)GGGGGGGGGAPR - Q07955
GSYGGGDGGYNGFGGDGGNYGGGPGYSSR(+14.02)	28.69	2659.06	29	-0.2	887.36	37.02	180000	10292	1	P51991	Methylation(R)	R29:Methylation(R):1000.00	GSYGGGDGGYNGFGGDGGNYGGGPGYSSR(+14.02) - P51991
TASPINSPAR(+14.02)GTPSPK	28.64	1593.85	16	1.1	532.29	25.33	74800	4434	1	Q9BTV5	Methylation(R)	R10:Methylation(R):1000.00	TASPINSPAR(+14.02)GTPSPK - Q9BTV5
MSEGR(+14.02)GLPPPPR	28.52	1306.68	12	-0.2	436.568	26.74	257000	5111	1	Q15424	Methylation(R)	R5:Methylation(R):72.07	MSEGR(+14.02)GLPPPPR - Q15424
FGQGGAGPVGGQGPR(+14.02)GMGPGTPAGYGR(+14.02)GR	27.91	2683.31	29	0.9	671.837	30.51	358000	6975	1	P23246	Methylation(R)	R15:Methylation(R):4.48;R27:Methylation(R):0.00	FGQGGAGPVGGQGPR(+14.02)GMGPGTPAGYGR(+14.02)GR - P23246
LRASGAGKAIGVLTSGGDAQGMNAAVR(+14.02)AVTR	27.6	2968.6	31	1.2	743.158	50.34	439000	16678	1	P17858	Methylation(R)	R27:Methylation(R):0.00	LRASGAGKAIGVLTSGGDAQGMNAAVR(+14.02)AVTR - P17858
APVPVR(+14.02)GGPK	27.59	990.597	10	-0.3	331.206	24.62	41000	3873	1	Q12906	Methylation(R)	R6:Methylation(R):1000.00	APVPVR(+14.02)GGPK - Q12906
GGNFSGR(+14.02)GGFGGSR	27.52	1325.62	14	-0.4	442.881	25.47	2130000	4499	1	P09651	Methylation(R)	R7:Methylation(R):66.44	GGNFSGR(+14.02)GGFGGSR - P09651
ASR(+14.02)GGGNHQNNYQPY	27.42	1675.75	15	1.3	559.59	24.75	298000	3990	1	O14979	Methylation(R)	R3:Methylation(R):1000.00	ASR(+14.02)GGGNHQNNYQPY - O14979
SSGSGAGGGGR(+14.02)GGKASGDPGASGMSPR	27.39	2275.04	27	0.9	569.767	24.55	18300	3816	1	Q8NDT2	Methylation(R)	R11:Methylation(R):44.20	SSGSGAGGGGR(+14.02)GGKASGDPGASGMSPR - Q8NDT2
GGNFGGGGGNFGR(+14.02)GGNFGGR	27.36	1811.82	20	0.8	604.948	30.22	276000	6738	1	P51991	Methylation(R)	R13:Methylation(R):17.70	GGNFGGGGGNFGR(+14.02)GGNFGGR - P51991
TGSETPQAPMSGVGPVSGGPGGFGR(+14.02)GSQGGNFEGPNKRR	27.19	3784.81	39	0.1	947.21	33.55	338000	8539	1	Q8WXF1	Methylation(R)	R25:Methylation(R):3.89	TGSETPQAPMSGVGPVSGGPGGFGR(+14.02)GSQGGNFEGPNKRR - Q8WXF1
ASESPARGPSGSPRTQGR(+14.02)GGPASVPSSSPGTSVK	27.11	3206.6	34	0.3	642.328	25.42	126000	4550	1	O43237	Methylation(R)	R18:Methylation(R):0.45	ASESPARGPSGSPRTQGR(+14.02)GGPASVPSSSPGTSVK - O43237
FFGGDR(+14.02)GAPK	27.09	1064.54	10	0.1	533.278	26.22	79600	4938	1	P02686	Methylation(R)	R6:Methylation(R):1000.00	FFGGDR(+14.02)GAPK - P02686
TGSETPQAPMSGVGPVSGGPGGFGR(+14.02)GSQGGNFEGPNK	27.08	3472.61	37	0	1158.54	37.26	461000	10426	1	Q8WXF1	Methylation(R)	R25:Methylation(R):1000.00	TGSETPQAPMSGVGPVSGGPGGFGR(+14.02)GSQGGNFEGPNK - Q8WXF1
GPPPPGR(+14.02)GGPPPPPPPATGR	27.07	1869	20	0.8	624.008	26.37	62900	4997	1	P42768	Methylation(R)	R7:Methylation(R):28.31	GPPPPGR(+14.02)GGPPPPPPPATGR - P42768
GPANGFR(+14.02)GGYDGYRPSFSNTPNSGYTQSQFSAPR	26.85	3653.67	34	1.1	914.425	37.18	0	10405	0	Q14444	Methylation(R)	R7:Methylation(R):8.82	GPANGFR(+14.02)GGYDGYRPSFSNTPNSGYTQSQFSAPR - Q14444
GGYGGDR(+14.02)GGGSGYGGDR	26.61	1557.66	17	1.3	520.226	24.68	108000	3927	1	Q92804	Methylation(R)	R7:Methylation(R):41.01	GGYGGDR(+14.02)GGGSGYGGDR - Q92804
NMGGPYGGGNYGPGGSGGSGGYGGR(+14.02)SR	26.55	2446.05	27	0.6	816.357	29.55	669000	6361	1	P22626	Methylation(R)	R25:Methylation(R):15.73	NMGGPYGGGNYGPGGSGGSGGYGGR(+14.02)SR - P22626
GGSDGYGSGR(+14.02)GFGDGYNGYGGGPGGGNFGGSPGYGGGR(+14.02)	26.49	3415.43	38	-1.1	1139.48	37.29	11800	10465	1	P22626	Methylation(R)	R10:Methylation(R):1000.00;R38:Methylation(R):1000.00	GGSDGYGSGR(+14.02)GFGDGYNGYGGGPGGGNFGGSPGYGGGR(+14.02) - P22626
QSPLSSSSPFSNR(+14.02)PPLPPTPSR	26.43	2349.21	22	0.7	784.077	38.11	446000	10929	1	O43516	Methylation(R)	R13:Methylation(R):22.90	QSPLSSSSPFSNR(+14.02)PPLPPTPSR - O43516
GGNFGFGDSR(+14.02)GGGGNFGPGPGSNFR(+14.02)GGSDGYGSGR	26.34	3292.44	35	0.2	824.118	36.16	227000	9885	1	P22626	Methylation(R)	R10:Methylation(R):12.50;R25:Methylation(R):13.58	GGNFGFGDSR(+14.02)GGGGNFGPGPGSNFR(+14.02)GGSDGYGSGR - P22626
LGPGTR(+14.02)LSLAR	26.11	1153.69	11	0.6	577.854	30.9	251000	7266	1	P14136	Methylation(R)	R6:Methylation(R):41.96	LGPGTR(+14.02)LSLAR - P14136
AGPTERGAQGSPAR(+14.02)	25.83	1367.69	14	1.1	456.905	24.75	14600	3950	1	Q9UJ96	Methylation(R)	R14:Methylation(R):0.00	AGPTERGAQGSPAR(+14.02) - Q9UJ96
GLGR(+14.02)GGGGPEGGGFPNGAGPAER	25.43	2036.98	23	1.1	680	29.86	0	6609	0	Q9H074	Methylation(R)	R4:Methylation(R):16.89	GLGR(+14.02)GGGGPEGGGFPNGAGPAER - Q9H074
GAAPPPPPVPR(+14.02)	25.4	1068.61	11	0.8	535.312	29.58	51000	6473	1	Q07666	Methylation(R)	R11:Methylation(R):1000.00	GAAPPPPPVPR(+14.02) - Q07666
GRGR(+14.02)GR(+14.02)PPSGGSGLGGDGGGC(+57.02)GGGGSGGGGAPRR(+14.02)	25.37	2935.4	34	-0.1	979.475	48.47	0	15881	0	Q9UBB5	Methylation(R); Carbamidomethylation	R4:Methylation(R):0.00;R6:Methylation(R):5.55;C21:Carbamidomethylation:1000.00;R34:Methylation(R):7.65	GRGR(+14.02)GR(+14.02)PPSGGSGLGGDGGGC(+57.02)GGGGSGGGGAPRR(+14.02) - Q9UBB5
SGGYGGDRSGGGYGGDR(+14.02)GGGYGGDR(+14.02)GGYGGK	25.36	2840.22	31	0.4	711.064	25.27	185000	4392	1	Q92804	Methylation(R)	R17:Methylation(R):23.02;R25:Methylation(R):19.66	SGGYGGDRSGGGYGGDR(+14.02)GGGYGGDR(+14.02)GGYGGK - Q92804
SAGGRPGSGPQLGTGR(+14.02)GTLR	25.11	1895.01	20	0	474.759	25.58	61900	4584	1	O14908	Methylation(R)	R16:Methylation(R):14.54	SAGGRPGSGPQLGTGR(+14.02)GTLR - O14908
SLYASSPGGVYATR(+14.02)SSAVR	24.88	1941.99	19	0.5	648.338	31.47	1350000	7510	1	P08670	Methylation(R)	R14:Methylation(R):17.07	SLYASSPGGVYATR(+14.02)SSAVR - P08670
EVMSPTGSAR(+14.02)	24.61	1047.5	10	0.4	524.758	25.75	11600	4712	1	O43347	Methylation(R)	R10:Methylation(R):1000.00	EVMSPTGSAR(+14.02) - O43347
RGKPASGAGAGAGAGKR(+14.02)	24.56	1481.82	17	0	494.946	26.53	0	5075	0	O43818	Methylation(R)	R17:Methylation(R):11.57	RGKPASGAGAGAGAGKR(+14.02) - O43818
GGPMGR(+14.02)GGYGGGGSGGGGR(+14.02)	24.35	1577.71	19	1.1	789.864	25.51	0	4557	0	P35637	Methylation(R)	R6:Methylation(R):1000.00;R19:Methylation(R):1000.00	GGPMGR(+14.02)GGYGGGGSGGGGR(+14.02) - P35637
SGRGTGR(+14.02)GGGGGGGGGAPR	24.35	1540.76	19	0.8	386.197	24.26	55800	3618	1	Q07955	Methylation(R)	R7:Methylation(R):6.65	SGRGTGR(+14.02)GGGGGGGGGAPR - Q07955
RDVQQQIAQAQQGEGGLPDR(+14.02)GHEELR	24.13	2928.46	26	-0.2	977.159	45.53	0	14705	0	Q8NF91	Methylation(R)	R20:Methylation(R):2.36	RDVQQQIAQAQQGEGGLPDR(+14.02)GHEELR - Q8NF91
VANTSTQTMGPR(+14.02)PAAAAAAATPAVR(+14.02)	23.97	2408.26	25	0.3	803.761	30.92	27700	7132	1	P11940	Methylation(R)	R12:Methylation(R):1000.00;R25:Methylation(R):1000.00	VANTSTQTMGPR(+14.02)PAAAAAAATPAVR(+14.02) - P11940
LAAAEETAVSPR(+14.02)K	23.95	1355.74	13	0.6	452.921	27.18	307000	5308	1	Q9BUH6	Methylation(R)	R12:Methylation(R):1000.00	LAAAEETAVSPR(+14.02)K - Q9BUH6
SGGGYGGDR(+14.02)GGGYGGDR(+14.02)GGYGGK	23.75	2090.92	23	0.2	523.736	24.88	163000	4089	1	Q92804	Methylation(R)	R9:Methylation(R):1000.00;R17:Methylation(R):1000.00	SGGGYGGDR(+14.02)GGGYGGDR(+14.02)GGYGGK - Q92804
AGDRVM(+4.02)VLNR(+14.02)	23.52	1147.64	10	0.6	574.828	32.3	102000	7913	1	Q99536	13C(1) 2H(3) Silac label; Methylation(R)	M6:13C(1) 2H(3) Silac label:1000.00;R10:Methylation(R):9.27	AGDRVM(+4.02)VLNR(+14.02) - Q99536
NQGGYGGSSSSSSYGSGR(+14.02)R	23.49	1863.81	19	1	622.278	24.6	36500	3872	1	P09651	Methylation(R)	R18:Methylation(R):8.69	NQGGYGGSSSSSSYGSGR(+14.02)R - P09651
GGNFGGGGGNFGR(+14.02)	23.38	1166.52	13	1.9	584.269	29.35	26300	6378	1	P51991	Methylation(R)	R13:Methylation(R):1000.00	GGNFGGGGGNFGR(+14.02) - P51991
EAADR(+14.02)ADGAAPGVASR	23.07	1526.74	16	0.5	509.922	27.74	309000	5681	1	Q8N3D4	Methylation(R)	R5:Methylation(R):10.20	EAADR(+14.02)ADGAAPGVASR - Q8N3D4
EGR(+14.02)GMPPPLR	22.88	1122.6	10	-1.1	375.206	27.27	32300	5406	1	Q01844	Methylation(R)	R3:Methylation(R):53.63	EGR(+14.02)GMPPPLR - Q01844
SGRGTGR(+14.02)GGGGGGGGGAPR(+14.02)GR(+14.02)	22.62	1781.91	21	-0.6	446.485	24.44	340000	3661	1	Q07955	Methylation(R)	R7:Methylation(R):0.00;R19:Methylation(R):0.65;R21:Methylation(R):0.00	SGRGTGR(+14.02)GGGGGGGGGAPR(+14.02)GR(+14.02) - Q07955
FGQGGAGPVGGQGPR(+14.02)GMGPGTPAGYGR(+14.02)	22.51	2470.19	27	-0.8	824.404	33.16	0	8352	0	P23246	Methylation(R)	R15:Methylation(R):1000.00;R27:Methylation(R):1000.00	FGQGGAGPVGGQGPR(+14.02)GMGPGTPAGYGR(+14.02) - P23246
GPPLDGR(+14.02)GGRDPRGIDAR	22.48	1874.98	18	0.9	469.753	25.7	1590000	4561	1	P33240	Methylation(R)	R7:Methylation(R):5.08	GPPLDGR(+14.02)GGRDPRGIDAR - P33240
VNAGTLAVLQR(+14.02)	22.25	1154.68	11	1.1	578.346	36.11	1490000	10063	1	A3KMH1	Methylation(R)	R11:Methylation(R):1000.00	VNAGTLAVLQR(+14.02) - A3KMH1
EDAAAR(+14.02)KPLTPKPK	21.88	1534.88	14	1.1	384.728	28.27	0	5870	0	O14686	Methylation(R)	R6:Methylation(R):1000.00	EDAAAR(+14.02)KPLTPKPK - O14686
NPQPQPVDGVFVYPLAEAEVVSGFEAEAAGR(+14.02)R	21.82	3412.71	32	0.6	854.184	51.24	0	17155	0	Q8N398	Methylation(R)	R31:Methylation(R):0.00	NPQPQPVDGVFVYPLAEAEVVSGFEAEAAGR(+14.02)R - Q8N398
GIPGFAGADGGPGPRGLPGDAGR(+14.02)	21.72	2062.03	23	-0.9	1032.02	49.78	0	16452	0	P08572	Methylation(R)	R23:Methylation(R):2.02	GIPGFAGADGGPGPRGLPGDAGR(+14.02) - P08572
GIGVFSTGTGASGIQSLSR(+14.02)	21.72	1807.94	19	1.2	904.98	46.56	680000	14900	1	Q53TQ3	Methylation(R)	R19:Methylation(R):1000.00	GIGVFSTGTGASGIQSLSR(+14.02) - Q53TQ3
R(+14.02)LGLGAGPGARR(+14.02)C(+57.02)AR	21.71	1594.89	15	0.9	532.639	38.25	49600	10996	1	Q8NG06	Methylation(R); Carbamidomethylation	R1:Methylation(R):16.78;R12:Methylation(R):0.00;C13:Carbamidomethylation:1000.00	R(+14.02)LGLGAGPGARR(+14.02)C(+57.02)AR - Q8NG06
R(+14.02)EGAGDAEADPLEPPPPQQQLGLSLR	21.55	2754.39	26	-1.8	919.137	50.97	0	17011	0	Q9BTC0	Methylation(R)	R1:Methylation(R):7.26	R(+14.02)EGAGDAEADPLEPPPPQQQLGLSLR - Q9BTC0
HTQPAGPGR(+14.02)AQR	21.45	1288.67	12	1.7	430.566	24.67	169000	3911	1	Q8NC74	Methylation(R)	R9:Methylation(R):10.22	HTQPAGPGR(+14.02)AQR - Q8NC74
WPGAQVLWGLSDPVAYITLDPR(+14.02)	21.37	2467.29	22	-1	1234.65	51.83	47500	17536	1	A2VEC9	Methylation(R)	R22:Methylation(R):1000.00	WPGAQVLWGLSDPVAYITLDPR(+14.02) - A2VEC9
SPVEGLGR(+14.02)AHR	21.34	1191.65	11	0.8	398.223	24.74	143000	3972	1	Q9Y5U2	Methylation(R)	R8:Methylation(R):29.32	SPVEGLGR(+14.02)AHR - Q9Y5U2
R(+14.02)SYVSSGEMMVGGLAPGRR	21.26	2023.01	19	-0.4	675.343	34.76	1040000	9103	1	P14136	Methylation(R)	R1:Methylation(R):42.74	R(+14.02)SYVSSGEMMVGGLAPGRR - P14136
RITSAAR(+14.02)R	21.08	943.567	8	-0.1	315.53	24.44	277000	3670	1	P14136	Methylation(R)	R7:Methylation(R):17.01	RITSAAR(+14.02)R - P14136
MGAGMGFGLER(+14.02)	21.08	1138.53	11	1.2	570.271	39.58	149000	11628	1	P52272	Methylation(R)	R11:Methylation(R):1000.00	MGAGMGFGLER(+14.02) - P52272
AGGLLGAGPDPR(+14.02)GGGPMGPGSGPNLR	20.97	2328.18	26	0.6	777.066	37.68	346000	10650	1	P0CG12	Methylation(R)	R12:Methylation(R):20.81	AGGLLGAGPDPR(+14.02)GGGPMGPGSGPNLR - P0CG12
GVPPPPTVR(+14.02)	20.95	932.544	9	1.3	467.28	28.52	51900	5966	1	Q07666	Methylation(R)	R9:Methylation(R):1000.00	GVPPPPTVR(+14.02) - Q07666
GPPLDGRGGR(+14.02)DPRGIDAR	20.78	1874.98	18	0.9	469.753	25.7	1590000	4771	1	P33240	Methylation(R)	R10:Methylation(R):0.00	GPPLDGRGGR(+14.02)DPRGIDAR - P33240
SGATAGAAGGR(+14.02)GKGAYQDRDKPAQIR	20.75	2572.32	26	0.3	644.088	24.82	146000	4027	1	P50991	Methylation(R)	R11:Methylation(R):6.04	SGATAGAAGGR(+14.02)GKGAYQDRDKPAQIR - P50991
AAAAAAAVAVPLAGGQEGSPGGGR(+14.02)R	20.72	2175.15	25	1.5	726.059	44.46	0	14199	0	Q92541	Methylation(R)	R24:Methylation(R):8.14	AAAAAAAVAVPLAGGQEGSPGGGR(+14.02)R - Q92541
LLGGADLAQGNHSGAR(+14.02)	20.65	1549.8	16	1.6	775.907	50.48	275000	16746	1	Q5W5X9	Methylation(R)	R16:Methylation(R):1000.00	LLGGADLAQGNHSGAR(+14.02) - Q5W5X9
APGFLQPPPLR(+14.02)QPR	20.56	1586.9	14	0.4	529.976	36.99	0	10296	0	Q9H074	Methylation(R)	R11:Methylation(R):12.33	APGFLQPPPLR(+14.02)QPR - Q9H074
AKNWAATSAGGSGANTR(+14.02)K	20.39	1760.89	18	1.6	587.972	30.54	62100	7040	1	Q92502	Methylation(R)	R17:Methylation(R):1000.00	AKNWAATSAGGSGANTR(+14.02)K - Q92502
TPQTVAGYTIPPGHQVC(+57.02)VSPTVNQR(+14.02)	20.01	2720.37	25	0.3	907.798	44.51	0	14214	0	Q16850	Carbamidomethylation; Methylation(R)	C17:Carbamidomethylation:1000.00;R25:Methylation(R):1000.00	TPQTVAGYTIPPGHQVC(+57.02)VSPTVNQR(+14.02) - Q16850
GR(+14.02)GYFEHR	19.97	1034.5	8	-0.7	345.842	24.58	92600	3847	1	Q9BUJ2	Methylation(R)	R2:Methylation(R):69.64	GR(+14.02)GYFEHR - Q9BUJ2
R(+14.02)SSPSARPPDVPGQQPQAAK	19.94	2087.09	20	0.3	696.703	44.97	25000	14450	1	Q96JP5	Methylation(R)	R1:Methylation(R):0.00	R(+14.02)SSPSARPPDVPGQQPQAAK - Q96JP5
GGPPGPPISR(+14.02)GLPLVDDGGWNTVPISK	19.87	2696.43	27	0.9	899.818	45.38	54000	14669	1	Q04637	Methylation(R)	R10:Methylation(R):1000.00	GGPPGPPISR(+14.02)GLPLVDDGGWNTVPISK - Q04637

## Sheet: Pool1_peptide_ID
Peptide	-10lgP	Mass	Length	ppm	m/z	RT	Area D133_AF	Fraction	Scan	Source File	#Feature	#Feature D133_AF	Accession	PTM	AScore
DNNLLGKFELTGIPPAPR(+14.02)	107.91	1965.07	18	1	656.031	47.09	8020000	1	15518	D133_AF.raw	2	2	P11142	Methylation(R)	R18:Methylation(R):1000.00
VIHDNFGIVEGLMTTVHAITATQK	99.22	2594.35	24	-0.9	865.791	51.6	614000	1	17547	D133_AF.raw	1	1	P04406
RHPYFYAPELLYYANK	98.46	2044.02	16	0.7	682.348	44.83	4900000	1	14536	D133_AF.raw	3	3
AHQNTLEVYPPFLFFLAVGGVYHPR	94	2871.49	25	1.6	718.88	52.07	735000	1	17920	D133_AF.raw	1	1	O14880
THINIVVIGHVDSGK	93.28	1587.87	15	0.6	530.299	33.91	1190000	1	8664	D133_AF.raw	3	3	P68104
HPYFYAPELLYYANK	92.49	1887.92	15	1.2	630.315	45.77	2040000	1	14970	D133_AF.raw	1	1
LLSHC(+57.02)LLVTLAAHLPAEFTPAVHASLDK	92.09	3023.63	28	0.6	756.914	50.87	49200000	1	17183	D133_AF.raw	4	4	P69905	Carbamidomethylation	C5:Carbamidomethylation:1000.00
ALVLIAFAQYLQQC(+57.02)PFEDHVK	91.94	2489.28	21	0.6	830.767	52.04	2900000	1	17876	D133_AF.raw	1	1	P02768	Carbamidomethylation	C14:Carbamidomethylation:1000.00
TFHIFYYLLSGAGEHLK	91.01	1995.03	17	1.1	666.016	50.86	4740000	1	16882	D133_AF.raw	2	2	P35579
LLGNVLVC(+57.02)VLAHHFGK	90.94	1775.99	16	-0.5	889	48.49	359000000	1	16214	D133_AF.raw	3	3	P68871	Carbamidomethylation	C8:Carbamidomethylation:1000.00
C(+57.02)PLLKPWALTFSYGR	90.08	1807.94	15	0.2	603.655	46.9	10300000	1	15333	D133_AF.raw	2	2	P04075	Carbamidomethylation	C1:Carbamidomethylation:1000.00
SR(+14.02)SVSGASTGLSSSPLSSPR	88.89	1932.99	20	-0.1	645.336	30.13	96100	1	6866	D133_AF.raw	1	1	Q8TDC3	Methylation(R)	R2:Methylation(R):218.75
YSLLPFWYTLLYQAHR	88.87	2070.07	16	1.3	691.032	52.07	363000	1	17930	D133_AF.raw	1	1	Q14697
LHFFMPGFAPLTSR	87.72	1619.83	14	0.7	540.95	48.13	2440000	1	15980	D133_AF.raw	1	1	P07437:Q13885:Q9BVA1:P68371:Q9BUF5
RHPDYSVVLLLR	87.43	1466.84	12	0	489.952	41.7	8350000	1	12969	D133_AF.raw	3	3	P02768
RHPEYAVSVLLR	87.31	1438.8	12	0.4	480.609	37.79	8350000	1	10809	D133_AF.raw	2	2
GSRGGSGGSYGGGGSGGGYGGGSGSR	86.79	2090.88	26	0.3	697.966	24.53	176000	1	4042	D133_AF.raw	1	1	P35527
KLPPLPLTLALGAFLNHR	85.59	1970.18	18	1.1	657.736	51.86	163000	1	17721	D133_AF.raw	1	1	O96008
HIADLAGNSEVILPVPAFNVINGGSHAGNK	84.98	3010.56	30	-0.6	753.648	46.24	629000	1	15048	D133_AF.raw	1	1	P06733
NR(+14.02)PPFGQGYTQPGPGYR	83.93	1904.93	17	0.4	635.984	31.78	1170000	1	7659	D133_AF.raw	1	1	Q92734	Methylation(R)	R2:Methylation(R):149.42
GSR(+14.02)GGSGGSYGGGGSGGGYGGGSGSR	83.38	2104.89	26	0.5	702.638	24.56	57100	1	4063	D133_AF.raw	1	1	P35527	Methylation(R)	R3:Methylation(R):136.25
AAVPSGASTGIYEALELR	82.45	1803.94	18	0.1	902.976	45.69	240000	1	14838	D133_AF.raw	2	2	P06733:P13929
KVADALTNAVAHVDDMPNALSALSDLHAHK	82.29	3123.58	30	0.3	625.723	46.46	944000	1	15185	D133_AF.raw	2	2	P69905
RPFFPFHSPSR	81.79	1373.7	11	1.4	458.908	34.92	24100000	1	9176	D133_AF.raw	1	1	P02511
RPPSAFFLFC(+57.02)SEYRPK	81.75	2000.99	16	0.1	501.256	42.38	1090000	1	13276	D133_AF.raw	2	2	P09429	Carbamidomethylation	C10:Carbamidomethylation:1000.00
HEQNIDC(+57.02)GGGYVK	81.62	1475.65	13	0.2	738.831	25.43	20200	1	4724	D133_AF.raw	1	1	P27797	Carbamidomethylation	C7:Carbamidomethylation:1000.00
KDLYANTVLSGGTTMYPGIADR	81.27	2342.16	22	-0.4	781.726	41.85	209000	1	12939	D133_AF.raw	1	1	P60709:P63261
LFTFHADIC(+57.02)TLPDTEK	81.23	1906.91	16	0.8	636.646	42.29	3770000	1	13314	D133_AF.raw	1	1		Carbamidomethylation	C9:Carbamidomethylation:1000.00
HWPFMVVNDAGRPK	81.16	1652.82	14	1	551.949	38	2730000	1	10901	D133_AF.raw	1	1	P11142
HTIIISWGGVNVPK	81.03	1519.85	14	0.6	507.625	41.02	651000	1	12642	D133_AF.raw	1	1	Q14315
FELTGIPPAPR(+14.02)	80.96	1210.67	11	0.5	606.343	41.39	77300000	1	13482	D133_AF.raw	3	3	P11142	Methylation(R)	R11:Methylation(R):1000.00
LC(+57.02)YVALDFEQEMATAASSSSLEK	80.07	2549.17	23	1.1	1275.59	51.76	6650000	1	17638	D133_AF.raw	2	2	P60709:P63261	Carbamidomethylation	C2:Carbamidomethylation:1000.00
HFC(+57.02)PNVPIILVGNKK	79.95	1734.96	15	1	579.328	37.88	1130000	1	10917	D133_AF.raw	1	1	P61586:P08134	Carbamidomethylation	C3:Carbamidomethylation:1000.00
SR(+14.02)SISGASSGLSTSPLSSPR	79.62	1947	20	0.1	650.008	31.59	0	1	7626	D133_AF.raw	0	0	Q8IWQ3	Methylation(R)	R2:Methylation(R):139.39
LTPFMLGALVAMYEHK	79.08	1819.94	16	0.8	607.653	51.97	36400	1	17829	D133_AF.raw	1	1	P06744
LLSHC(+57.02)LLVTLAAHLPAEFTPAVHASLDKFLASVSTVLTSK	78.97	4257.32	40	0.6	852.472	56.94	12900000	1	20419	D133_AF.raw	3	3	P69905	Carbamidomethylation	C5:Carbamidomethylation:1000.00
LIGLTTIFSATALGFLAHKR	78.64	2129.24	20	0.9	533.317	51.83	171000	1	17711	D133_AF.raw	1	1	P27338
KLADQC(+57.02)TGLQGFLVFHSFGGGTGSGFTSLLMER	78.41	3517.71	33	0.4	880.436	51.57	484000	1	17529	D133_AF.raw	1	1	Q71U36:P68363:Q9BQE3	Carbamidomethylation	C6:Carbamidomethylation:1000.00
HLQEYQDLLNVK	77.61	1498.78	12	0.8	500.6	37.75	5850000	1	10810	D133_AF.raw	2	2	P14136
GR(+14.02)GFTPVVDDPVTER	77.09	1657.84	15	1.5	553.622	34.37	2730000	1	8892	D133_AF.raw	2	2	O76041	Methylation(R)	R2:Methylation(R):112.98
HTAMVSWGGVSIPNSPFR	76.66	1941.95	18	0	648.325	44.71	233000	1	14422	D133_AF.raw	1	1	P21333
HPYFYAPELLFFAK	76.35	1741.89	14	1.7	581.637	51.48	1160000	1	17423	D133_AF.raw	1	1	P02768
LVQDVANNTNEEAGDGTTTATVLAR	76.18	2559.24	25	0.4	854.088	36.82	74600	1	10248	D133_AF.raw	1	1	P10809
SYELPDGQVITIGNER	76.03	1789.88	16	0.4	895.95	44.44	1170000	1	14221	D133_AF.raw	1	1	P60709:P63261
C(+57.02)PLPRPWALTFSYGR	75.84	1819.92	15	0.3	607.647	44.94	2780000	1	14573	D133_AF.raw	1	1	P09972	Carbamidomethylation	C1:Carbamidomethylation:1000.00
HLVDEPQNLIK	75.59	1304.71	11	0	653.362	33.42	1090000	1	8574	D133_AF.raw	1	1
KPLVIIAEDVDGEALSTLVLNR	75.49	2364.33	22	1.1	789.117	51.32	76400	1	17396	D133_AF.raw	1	1	P10809
MAVTFIGNSTAIQELFK	75.3	1868.97	17	0.1	935.493	51.94	91400	1	17800	D133_AF.raw	1	1	P07437
EQQHVMEELFQSSFR	75.28	1893.87	15	1.2	632.297	43.81	300000	1	13978	D133_AF.raw	1	1	P78527
GGNFGFGDSR(+14.02)GGGGNFGPGPGSNFR	75.05	2385.06	25	0.8	796.029	38.23	8900000	1	11121	D133_AF.raw	2	2	P22626	Methylation(R)	R10:Methylation(R):94.92
LLGNVLVC(+57.02)VLAR	75.03	1325.79	12	0.7	663.9	50.13	855000	1	16817	D133_AF.raw	1	1	P02042	Carbamidomethylation	C8:Carbamidomethylation:1000.00
HSQFIGYPITLFVEK	74.73	1777.94	15	0.4	593.654	47.74	583000	1	15710	D133_AF.raw	1	1	P07900
DLYANTVLSGGTTMYPGIADR	74.51	2214.06	21	-0.5	1108.04	48.67	1020000	1	16087	D133_AF.raw	1	1	P60709:P63261
R(+14.02)GAYGGGYGGYDDYNGYNDGYGFGSDR	74.45	2886.15	27	0.5	963.059	38.73	1480000	1	11390	D133_AF.raw	1	1	P31943	Methylation(R)	R1:Methylation(R):112.30
NR(+14.02)PPFGQGYTQPGPGYR(+14.02)	74.35	1918.94	17	0.9	640.656	32.02	606000	1	7916	D133_AF.raw	1	1	Q92734	Methylation(R)	R2:Methylation(R):1000.00;R17:Methylation(R):1000.00
FLASVSTVLTSK	73.61	1251.71	12	0.6	626.861	41.48	5710000	1	13008	D133_AF.raw	5	5	P69905
HLYPNTPYAYTFWTYMMNAR	73.45	2539.15	20	0	847.389	51.8	196000	1	17689	D133_AF.raw	1	1	P27695
KVPQVSTPTLVEVSR	72.84	1638.93	15	0.3	547.318	35.09	504000	1	9287	D133_AF.raw	1	1	P02768
VGAHAGEYGAEALER	72.73	1528.73	15	0.4	510.583	29.23	986000	1	6403	D133_AF.raw	2	2	P69905
HHAAYVNNLNVTEEK	72.69	1737.84	15	1.3	580.289	29.39	930000	1	6578	D133_AF.raw	1	1	P04179
TPC(+57.02)TVSC(+57.02)NIPVVSGK	72.51	1617.79	15	0.1	809.9	35.09	164000	1	9306	D133_AF.raw	1	1	P02675	Carbamidomethylation	C3:Carbamidomethylation:1000.00;C7:Carbamidomethylation:1000.00
VNNSSLIGLGYTQTLKPGIK	72.49	2102.17	20	0.9	701.732	39.86	217000	1	11876	D133_AF.raw	1	1	P21796
FELSGIPPAPR(+14.02)	72.41	1196.66	11	0.7	599.335	40.84	103000000	1	12897	D133_AF.raw	1	1	P0DMV9:P0DMV8	Methylation(R)	R11:Methylation(R):1000.00
LLVVYPWTQR	72.34	1273.72	10	0.7	637.867	45.91	23900000	1	15009	D133_AF.raw	1	1	P68871:P02042
SLYASSPGGVYATR	72.31	1427.7	14	-0.5	714.859	33.75	922000	1	8609	D133_AF.raw	1	1	P08670
LSLAR(+14.02)MPPPLPTR	72.26	1461.85	13	1.6	488.291	37.81	19400000	1	10667	D133_AF.raw	1	1	P14136	Methylation(R)	R5:Methylation(R):131.34
HPYFYAPELLFFAKR	72.09	1897.99	15	0.5	633.67	48.26	68400	1	15983	D133_AF.raw	1	1	P02768
SIITYVVTYYHYFSK	71.79	1882.95	15	0.9	628.658	51.81	723000	1	17694	D133_AF.raw	1	1	Q01082
VSAKNALESYAFNMK	71.63	1671.83	15	0.4	558.284	38.73	451000	1	11303	D133_AF.raw	1	1	P0DMV9:P0DMV8
AMVALIDVFHQYSGR	71.37	1705.86	15	1.2	569.628	47.65	328000	1	15717	D133_AF.raw	2	2	P04271
HGGTIPIVPTAEFQDR	71.34	1736.88	16	0.6	579.969	38.43	209000	1	11082	D133_AF.raw	1	1	P00367
RHPYFYAPELLFFAK	71.34	1897.99	15	-0.2	633.67	51.06	2410000	1	17193	D133_AF.raw	1	1	P02768
AR(+14.02)GGC(+57.02)PGGEATLSQPPPR	71.24	1820.9	18	0.5	607.973	26.16	104000	1	5024	D133_AF.raw	1	1	P20290	Methylation(R); Carbamidomethylation	R2:Methylation(R):103.53;C5:Carbamidomethylation:1000.00
GLVLIAFSQYLQQC(+57.02)PFDEHVK	71.17	2491.26	21	0.2	831.426	51.77	7040000	1	17643	D133_AF.raw	1	1		Carbamidomethylation	C14:Carbamidomethylation:1000.00
R(+14.02)SYVSSGEMMVGGLAPGR	71.14	1866.91	18	0.6	623.31	37.75	1830000	1	10817	D133_AF.raw	1	1	P14136	Methylation(R)	R1:Methylation(R):110.48
VSHVSTGGGASLELLEGK	70.94	1739.91	18	0	580.976	35.86	218000	1	9658	D133_AF.raw	1	1	P00558
TIQFVDWC(+57.02)PTGFK	70.9	1597.76	13	0.4	799.888	47.91	3090000	1	15905	D133_AF.raw	1	1	Q71U36:Q9BQE3:Q9NY65	Carbamidomethylation	C8:Carbamidomethylation:1000.00
AVC(+57.02)MLSNTTAIAEAWAR	70.63	1863.9	17	1	932.957	47.61	161000	1	15688	D133_AF.raw	1	1	Q71U36:P68363:Q9NY65	Carbamidomethylation	C3:Carbamidomethylation:1000.00
HWGGNVLGPK	70.4	1063.56	10	0.9	532.786	29.91	311000	1	6766	D133_AF.raw	1	1	P62424
HQGVMVGMGQK	70.34	1170.56	11	1.2	586.29	25.99	874000	1	5082	D133_AF.raw	1	1	P60709:P63261
GPAVGIDLGTTYSC(+57.02)VGVFQHGK	70.2	2262.11	22	0.2	755.044	42.65	194000	1	13370	D133_AF.raw	1	1	P11142	Carbamidomethylation	C14:Carbamidomethylation:1000.00
LAQANGWGVMVSHR	70.04	1524.76	14	1.3	509.262	34.81	922000	1	9077	D133_AF.raw	1	1	P06733
DAFVAIVQSVK	69.71	1175.65	11	0.7	588.835	45.26	203000	1	14653	D133_AF.raw	1	1	P08133
VPTANVSVVDLTC(+57.02)R	69.43	1529.79	14	0.2	765.901	39.74	195000	1	11807	D133_AF.raw	1	1	P04406	Carbamidomethylation	C13:Carbamidomethylation:1000.00
TFHIFYQLLSGAGEHLK	69.27	1960.02	17	0.3	491.013	47.68	809000	1	15772	D133_AF.raw	1	1	P35580
FFESFGDLSTPDAVMGNPK	69.21	2057.94	19	-0.2	1029.98	48.89	818000	1	16188	D133_AF.raw	1	1	P68871
HAQAQYAYPGAR	69.08	1331.64	12	0	666.826	25.55	14600	1	4772	D133_AF.raw	1	1	Q14112
FDLTGIPPAPR(+14.02)	68.95	1196.66	11	0.7	599.335	40.84	103000000	1	13852	D133_AF.raw	1	1	P54652:P34931	Methylation(R)	R11:Methylation(R):1000.00
TYFPHFDLSHGSAQVK	68.61	1832.88	16	0.1	611.969	37.32	91600000	1	10375	D133_AF.raw	2	2	P69905
EIVHIQAGQC(+57.02)GNQIGAK	68.5	1821.92	17	0.3	608.313	30.12	407000	1	6846	D133_AF.raw	1	1	P07437:Q13885:Q9BVA1:Q13509	Carbamidomethylation	C10:Carbamidomethylation:1000.00
EIVHLQAGQC(+57.02)GNQIGAK	68.5	1821.92	17	0.3	608.313	30.12	407000	1	6846	D133_AF.raw	1	1	P68371	Carbamidomethylation	C10:Carbamidomethylation:1000.00
HIYYITGETK	68.5	1223.62	10	0.5	612.817	29.51	910000	1	6674	D133_AF.raw	1	1	P07900
VYAILTHGIFSGPAISR	68.35	1800.99	17	2.1	601.338	43.87	497000	1	13953	D133_AF.raw	1	1	P60891:P11908:P21108
FNHFSLTLNTNHGHILVDYSK	68.31	2456.22	21	0.6	615.063	40.37	446000	1	12186	D133_AF.raw	1	1	P06744
HNQLPLVIEFTEQTAPK	68.28	1964.04	17	1.1	655.687	44.62	145000	1	14323	D133_AF.raw	1	1	P07237
LISQIVSSITASLR	68.02	1486.87	14	0	744.443	51.97	165000	1	17820	D133_AF.raw	1	1	P68363:Q9BQE3:Q9NY65
SAVTALWGK	68.02	931.513	9	1.2	466.764	38.59	8090000	1	11183	D133_AF.raw	1	1	P68871
ALSDHHIYLEGTLLKPNMVTPGHAC(+57.02)TQK	67.85	3130.57	28	0.6	627.121	38.51	541000	1	11148	D133_AF.raw	1	1	P04075	Carbamidomethylation	C25:Carbamidomethylation:1000.00
TTGIVMDSGDGVTHTVPIYEGYALPHAILR	67.72	3182.61	30	0.5	796.659	45.14	4650000	1	14537	D133_AF.raw	3	3	P60709:P63261
AAVEEGIVLGGGC(+57.02)ALLR	67.67	1683.9	17	-0.3	842.956	44.93	76100	1	14506	D133_AF.raw	1	1	P10809	Carbamidomethylation	C13:Carbamidomethylation:1000.00
SYVSSGEMMVGGLAPGR	67.64	1696.79	17	0.1	849.403	41.68	426000	1	12830	D133_AF.raw	1	1	P14136
VLGAFSDGLAHLDNLK	67.35	1668.88	16	-0.7	835.448	43.57	1640000	1	13863	D133_AF.raw	2	2	P68871:P02042
IWHHTFYNELR	67.1	1514.74	11	1.2	505.922	35.24	7540000	1	9487	D133_AF.raw	1	1	P60709:P63261
HTGPGILSMANAGPNTNGSQFFIC(+57.02)TAK	67.01	2790.32	27	0.9	931.115	43.74	1260000	1	13919	D133_AF.raw	1	1	P62937	Carbamidomethylation	C24:Carbamidomethylation:1000.00
HLIPAANTGESK	66.84	1236.65	12	0.4	619.331	25.62	113000	1	4778	D133_AF.raw	1	1	P62258
HYQFASGAFLHIK	66.56	1517.78	13	0.4	506.933	38.33	116000	1	11035	D133_AF.raw	1	1	Q8WUM4
R(+14.02)GAYGGGYGGYDDYGGYNDGYGFGSDR	66.45	2829.13	27	0.6	944.052	39.13	2480000	1	11636	D133_AF.raw	1	1	P55795	Methylation(R)	R1:Methylation(R):139.40
SALSGHLETVILGLLK	66.2	1649.97	16	1.5	550.999	51.83	161000	1	17712	D133_AF.raw	1	1	P07355:A6NMY6
LGEYGFQNALIVR	66.11	1478.79	13	0.6	740.402	44.58	199000	1	14405	D133_AF.raw	1	1
HPDYSVVLLLR	65.85	1310.73	11	0.1	656.375	43.35	267000	1	13818	D133_AF.raw	1	1	P02768
HWPFQVINDGDKPK	65.84	1679.84	14	0.4	560.955	36.63	1910000	1	10226	D133_AF.raw	1	1	P0DMV9:P0DMV8
HFSPEELK	65.77	985.487	8	1.2	493.751	28.05	10400000	1	5920	D133_AF.raw	1	1	P02511
GMPPPLR(+14.02)GGPGGPGGPGGPMGR	65.75	1968.98	22	1.9	657.334	33.52	16500000	1	8555	D133_AF.raw	1	1	Q01844	Methylation(R)	R7:Methylation(R):132.31
HFYWYLTNEGIQYLR	65.75	2001.97	15	0.5	668.332	48.25	539000	1	15876	D133_AF.raw	1	1	P46783
HQAQIDHYLGLANK	65.72	1606.82	14	0.1	536.615	33.35	442000	1	8432	D133_AF.raw	1	1	Q9NQC3
EAASYQEALAR	65.67	1207.58	11	0.7	604.799	30.66	154000	1	7170	D133_AF.raw	1	1	P14136
ITIPVQTFSNLQIR	65.63	1628.92	14	-0.8	815.469	46.9	3000000	1	15356	D133_AF.raw	1	1	P14136
RGGPNYQEGLR	65.55	1245.62	11	1.2	416.215	25.3	74300	1	4638	D133_AF.raw	1	1	P53396
HYGPGWVSMANAGK	65.1	1473.68	14	1.7	492.236	34.23	471000	1	8835	D133_AF.raw	1	1	P23284
SSGPYGGGGQYFAKPR	64.82	1627.77	16	0.8	543.599	29.64	243000	1	6618	D133_AF.raw	1	1	P09651
VADALTNAVAHVDDMPNALSALSDLHAHK	64.81	2995.48	29	1.7	600.105	46.81	2000000	1	15312	D133_AF.raw	2	2	P69905
QQVHVELDVAKPDLTAALK	64.76	2074.14	19	1	519.543	39.32	1870000	1	11757	D133_AF.raw	2	2	P14136
TFVVQGFGNVGLHSMR	64.71	1747.88	16	0.2	583.635	41.08	322000	1	12540	D133_AF.raw	1	1	P00367
SGPFGQIFRPDNFVFGQSGAGNNWAK	64.71	2797.34	26	1	933.453	49.22	1460000	1	16402	D133_AF.raw	1	1	P07437:Q13885:Q9BVA1:P68371
ISLPLPNFSSLNLR	64.36	1569.89	14	-0.8	785.951	51.8	463000	1	17633	D133_AF.raw	1	1	P08670
HIGISFTPK	64.33	998.555	9	1.1	500.285	32.32	365000	1	8028	D133_AF.raw	1	1	Q14315
DHGVNSFLVYMAFK	64.25	1626.79	14	0.9	543.27	49.23	709000	1	16464	D133_AF.raw	4	4	Q16555
VLGDVIEVHGK	64.24	1164.65	11	2	389.225	31.89	239000	1	7747	D133_AF.raw	1	1	P02511
GGNFGGR(+14.02)SSGPYGGGGQYFAKPR	64.02	2287.09	23	-0.7	572.779	30.87	221000	1	7209	D133_AF.raw	1	1	P09651	Methylation(R)	R7:Methylation(R):91.80
THILLFLPK	63.98	1080.67	9	0.9	541.342	41.58	104000	1	12763	D133_AF.raw	1	1	P07237
HSSLAGC(+57.02)QIINYR	63.9	1517.74	13	0.4	506.921	32.54	242000	1	8062	D133_AF.raw	1	1	Q00610	Carbamidomethylation	C7:Carbamidomethylation:1000.00
TC(+57.02)LLIVFSK	63.81	1079.6	9	0.9	540.81	45.46	977000	1	14817	D133_AF.raw	1	1	P61586:P08134	Carbamidomethylation	C2:Carbamidomethylation:1000.00
FLFVLLGPEAPHIDYTQLGR	63.44	2285.22	20	-0.1	762.747	51.89	209000	1	17754	D133_AF.raw	1	1	P02730
TQYEAMASSNMHEAEEWYR	63.44	2331.95	19	-0.2	778.325	39.21	1350000	1	11678	D133_AF.raw	1	1	P14136
MFLSFPTTK	63.32	1070.55	9	0	536.281	43.57	4010000	1	13932	D133_AF.raw	1	1	P69905
LIQFHFHWGSLDGQGSEHTVDK	63.26	2537.21	22	1.1	635.31	41.55	2740000	1	12753	D133_AF.raw	2	2	P00918
SQSWSR(+14.02)GSPSTVSSSYK	63.22	1843.87	17	-0.1	615.631	27.73	486000	1	5687	D133_AF.raw	1	1	P07197	Methylation(R)	R6:Methylation(R):1000.00
WSVHIAMHPQVNIYSVTR	63.12	2137.09	18	-0.4	535.279	41.83	237000	1	12891	D133_AF.raw	1	1	Q16658
ALSDHHVYLEGTLLKPNMVTPGHAC(+57.02)PIK	62.87	3097.58	28	0	620.524	39.5	225000	1	11729	D133_AF.raw	1	1	P09972	Carbamidomethylation	C25:Carbamidomethylation:1000.00
HWILPQDYDHAQAEAR	62.56	1948.92	16	0.5	650.647	34.84	260000	1	9189	D133_AF.raw	1	1	Q15293
SGR(+14.02)GGNFGFGDSR	62.54	1326.61	13	1.4	443.21	28.44	13900000	1	6144	D133_AF.raw	2	2	P22626	Methylation(R)	R3:Methylation(R):103.28
MSATFIGNSTAIQELFKR	62.5	2013.04	18	1.7	672.02	46.95	433000	1	15383	D133_AF.raw	1	1	Q13885:Q9BVA1:P68371
YGFIEGHVVIPR	62.2	1385.75	12	0.4	462.923	38.76	364000	1	11341	D133_AF.raw	1	1	P16070
HGVVPLATYMR	62.13	1242.65	11	1.3	622.335	35.73	76600	1	9656	D133_AF.raw	1	1	P46778
HFVALSTNTTK	62.11	1217.64	11	0.8	609.828	27.45	385000	1	5539	D133_AF.raw	1	1	P06744
SLYASSPGGVYATR(+14.02)	62.07	1441.72	14	0	721.867	34.33	670000	1	8889	D133_AF.raw	1	1	P08670	Methylation(R)	R14:Methylation(R):1000.00
VTMLFLGLHNVR	62	1398.78	12	1	467.268	42.61	399000	1	13368	D133_AF.raw	1	1	P14868
TVTAMDVVYALK	61.95	1309.7	12	0.3	655.855	46.4	1290000	1	15291	D133_AF.raw	1	1	P62805
FNGGGHINHSIFWTNLSPNGGGEPK	61.89	2636.25	25	-0.4	879.758	39.31	326000	1	11524	D133_AF.raw	1	1	P04179
TLTIVDTGIGMTK	61.87	1348.73	13	0.7	675.371	42.23	240000	1	13166	D133_AF.raw	2	2	P07900
TLTLVDTGIGMTK	61.87	1348.73	13	0.7	675.371	42.23	240000	1	13166	D133_AF.raw	2	2	P08238
HVLFGTVGVPEHTYR	61.86	1710.88	15	0	571.302	35.42	321000	1	9434	D133_AF.raw	1	1	P04216
HALIIYDDLSK	61.83	1286.69	11	0.3	644.351	37.03	178000	1	10342	D133_AF.raw	1	1	P25705
MLVVLLQGTR	61.41	1128.67	10	1.3	565.342	43.43	491000	1	13890	D133_AF.raw	1	1	P08133
VVAGVANALAHK	61.34	1148.67	12	2	383.897	28.91	3650000	1	6248	D133_AF.raw	2	2	P68871:P02042
STTTGHLIYK	61.24	1119.59	10	0.7	560.804	25.61	171000	1	4769	D133_AF.raw	1	1	P68104
LRGGSPLNTGK	61.19	1098.61	11	1.2	367.213	24.72	119000	1	4197	D133_AF.raw	1	1	P12111
TAVNALWGK	61.05	958.524	9	0.1	480.269	36.07	586000	1	9806	D133_AF.raw	1	1	P02042
TKPSDEEMLFIYGHYK	60.99	1956.93	16	0.6	653.317	39.21	466000	1	11499	D133_AF.raw	1	1	P07108
VTHAVVTVPAYFNDAQR	60.97	1886.96	17	-0.4	629.995	37.36	109000	1	10541	D133_AF.raw	1	1	P11021
SGFGGSGGGR(+14.02)GGASGPGSGSGGPGGPAGR	60.95	2272.03	29	0.4	758.352	25.38	54400	1	4676	D133_AF.raw	1	1	Q9UKZ1	Methylation(R)	R10:Methylation(R):83.07
LLHDSGLNVVVLEAR	60.87	1633.92	15	0.1	545.646	40.42	51800	1	12240	D133_AF.raw	1	1	P27338
TVIIEQSWGSPK	60.84	1343.71	12	1	672.862	37.76	136000	1	10753	D133_AF.raw	1	1	P10809
HYC(+57.02)TVANPVSR	60.67	1302.61	11	1.8	652.315	26.05	70700	1	4981	D133_AF.raw	1	1	Q14764	Carbamidomethylation	C3:Carbamidomethylation:1000.00
C(+57.02)C(+57.02)TESLVNR	60.59	1137.49	9	0.9	569.753	26.71	79400	1	5271	D133_AF.raw	1	1	P02768	Carbamidomethylation	C1:Carbamidomethylation:1000.00;C2:Carbamidomethylation:1000.00
LRLDQLTANSAR	60.48	1356.75	12	0.5	453.257	33.78	293000	1	8591	D133_AF.raw	1	1	P14136
FATLAELVQYYMEHHGQLK	60.47	2277.13	19	1.1	570.289	51.43	87300	1	17468	D133_AF.raw	1	1	Q06124
SNVSDAVAQSTR	60.36	1233.6	12	0.7	617.805	27.19	101000	1	5447	D133_AF.raw	1	1	P60174
IGLFGGAGVGK	60.27	974.555	11	1	488.285	39.21	151000	1	11552	D133_AF.raw	1	1	P06576
VETGVLKPGMVVTFAPVNVTTEVK	60.18	2514.38	24	-0.2	839.133	45.09	174000	1	14588	D133_AF.raw	1	1	P68104
RVIISAPSADAPMFVMGVNHEK	60.13	2368.2	22	0.8	790.409	40.51	15200	1	12299	D133_AF.raw	1	1	P04406
WKPPMIDNPSYQGIWKPR	60.12	2212.12	18	0.4	554.039	41.4	169000	1	12733	D133_AF.raw	1	1	P27824
HTGPNSPDTANDGFVR	60.04	1683.76	16	-0.7	562.26	27.21	62800	1	5473	D133_AF.raw	1	1	P31943:P55795
SIQFVDWC(+57.02)PTGFK	60.01	1583.74	13	0.4	792.88	47.72	185000	1	15734	D133_AF.raw	1	1	P68363	Carbamidomethylation	C8:Carbamidomethylation:1000.00
YLTVAAVFR	59.75	1038.59	9	0.3	520.301	43.6	2570000	1	13917	D133_AF.raw	1	1	P07437:P68371
YSTSLSWIHLLKPLVHLQLPR	59.74	2500.43	21	0.6	626.116	51.52	86000	1	17526	D133_AF.raw	1	1	Q9NUY8
FGQGGAGPVGGQGPR(+14.02)	59.61	1354.67	15	0	678.344	28.39	189000	1	6007	D133_AF.raw	1	1	P23246	Methylation(R)	R15:Methylation(R):1000.00
LALDIEIATYR	59.58	1276.7	11	0.6	639.359	50.56	222000	1	16898	D133_AF.raw	2	2	P14136
LALDLEIATYR	59.58	1276.7	11	0.6	639.359	50.56	222000	1	16898	D133_AF.raw	2	2	P04264
AILVDLEPGTMDSVR	59.55	1614.83	15	0	808.422	45.09	87000	1	14618	D133_AF.raw	1	1	P07437:Q13885:Q9BVA1:Q13509
IISNASC(+57.02)TTNC(+57.02)LAPLAK	58.96	1832.91	17	0.5	917.464	36.3	133000	1	9966	D133_AF.raw	1	1	P04406	Carbamidomethylation	C7:Carbamidomethylation:1000.00;C11:Carbamidomethylation:1000.00
LIGDAAKNQVALNPQNTVFDAK	58.95	2326.23	22	-0.1	776.417	39.13	767000	1	11429	D133_AF.raw	1	1	P0DMV9:P0DMV8
TFAPEEISAMVLTK	58.73	1535.79	14	0.9	768.903	47.81	289000	1	15821	D133_AF.raw	1	1	P11021
TGQATVASGIPAGWMGLDC(+57.02)GPESSKK	58.65	2604.23	26	-1.4	869.083	41.81	47300	1	12916	D133_AF.raw	1	1	P00558	Carbamidomethylation	C19:Carbamidomethylation:1000.00
LISWYDNEFGYSNR	58.4	1762.8	14	0.5	882.405	45.89	247000	1	14953	D133_AF.raw	1	1	P04406
RGGPPGPPISR(+14.02)	58.26	1103.62	11	1.5	368.881	25.66	44600	1	4804	D133_AF.raw	1	1	Q04637	Methylation(R)	R11:Methylation(R):62.68
VNVDEVGGEALGR	58.11	1313.66	13	0.5	657.836	35.32	390000	1	9406	D133_AF.raw	1	1	P68871
ATFYLLIGNANAAKPDLDK	58.08	2034.08	19	1.5	679.034	43.45	146000	1	13821	D133_AF.raw	1	1	O94826
TTPSYVAFTDTER	57.99	1486.69	13	1	744.355	37.18	496000	1	10416	D133_AF.raw	1	1	P11142:P0DMV9:P0DMV8:P54652:P34931
HHC(+57.02)PNTPIILVGTK	57.81	1585.84	14	1.6	529.621	33.26	256000	1	8374	D133_AF.raw	1	1	P63000	Carbamidomethylation	C3:Carbamidomethylation:1000.00
TSASIGSLC(+57.02)ADAR	57.8	1307.61	13	0.6	654.815	32.16	211000	1	7861	D133_AF.raw	1	1	P60201	Carbamidomethylation	C9:Carbamidomethylation:1000.00
C(+57.02)GLVIGR(+14.02)GGENVK	57.79	1371.73	13	0.3	686.872	28.39	539000	1	6000	D133_AF.raw	1	1	Q92945	Carbamidomethylation; Methylation(R)	C1:Carbamidomethylation:1000.00;R7:Methylation(R):1000.00
SQIFSTASDNQPTVTIK	57.78	1835.93	17	-0.5	918.97	37.82	64000	1	10776	D133_AF.raw	1	1	P11021
DNIQGITKPAIR	57.75	1324.75	12	1.1	442.59	30.56	157000	1	7081	D133_AF.raw	1	1	P62805
FIVLSNNYLQIR	57.7	1478.82	12	-0.2	740.419	46.57	119000	1	15258	D133_AF.raw	1	1	P13591
GYSFTTTAER	57.65	1131.52	10	1.3	566.768	31.09	1680000	1	7334	D133_AF.raw	1	1	P60709:P63261
ILFIFIDSDHTDNQR	57.64	1832.91	15	0.6	611.976	46.2	731000	1	15059	D133_AF.raw	1	1	P07237
HGIPMSHVAR	57.62	1103.57	10	0.2	368.863	25.83	21100	1	4882	D133_AF.raw	1	1	P24666
SVLFVC(+57.02)LGNIC(+57.02)R	57.5	1436.73	12	0.5	719.371	46.76	50600	1	15367	D133_AF.raw	1	1	P24666	Carbamidomethylation	C6:Carbamidomethylation:1000.00;C11:Carbamidomethylation:1000.00
GGSDGYGSGR(+14.02)GFGDGYNGYGGGPGGGNFGGSPGYGGGR	57.38	3401.41	38	0.4	1134.81	37.3	1500000	1	10440	D133_AF.raw	1	1	P22626	Methylation(R)	R10:Methylation(R):70.33
GHYTEGAELVDSVLDVVRK	57.35	2086.07	19	0.6	696.364	46.61	92000	1	15242	D133_AF.raw	1	1	P07437:Q13885:Q9BVA1:P68371:Q13509
GR(+14.02)GAANDSTQFTVAGR	57.2	1620.8	16	0.8	541.273	27.32	258000	1	5492	D133_AF.raw	1	1	O95425	Methylation(R)	R2:Methylation(R):101.96
RGGPPGPPISR	57.19	1089.6	11	-0.2	364.209	25.24	63800	1	4535	D133_AF.raw	1	1	Q04637
HFVGMLPEKDC(+57.02)R	57.11	1487.7	12	0.5	496.908	30.12	114000	1	6833	D133_AF.raw	1	1	P60981	Carbamidomethylation	C11:Carbamidomethylation:1000.00
TKPYIQVDIGGGQTK	57.07	1603.86	15	1.4	535.627	32.68	386000	1	8102	D133_AF.raw	1	1	P11021
TQGR(+14.02)GGPASVPSSSPGTSVK	56.89	1869.95	20	1.2	624.326	25.29	7040000	1	4591	D133_AF.raw	1	1	O43237	Methylation(R)	R4:Methylation(R):1000.00
TIGGGDDSFNTFFSETGAGK	56.43	2006.89	20	-0.1	1004.45	46.48	687000	1	15186	D133_AF.raw	1	1	Q71U36:P68363:Q9BQE3
ALAAELNQLR	56.24	1097.62	10	0.2	549.817	37.17	233000	1	10390	D133_AF.raw	1	1	P14136
DFLAGGVAAAISK	56.22	1218.66	13	2.4	610.339	45.11	79900	1	14580	D133_AF.raw	1	1	P05141
LIGQIVSSITASLR	56.08	1456.86	14	0.3	729.438	51.78	1380000	1	17644	D133_AF.raw	1	1	Q71U36
RGGIPASPIDPFQSR	56.07	1596.84	15	1	533.287	38.53	231000	1	11114	D133_AF.raw	1	1	Q96LD4
GDVTAQIALQPALK	56.04	1423.8	14	0.8	712.91	39.98	324000	1	11937	D133_AF.raw	1	1	P04179
SGRGGNFGFGDSRGGGGNFGPGPGSNFR	55.73	2671.2	28	0.7	668.808	35.45	1210000	1	9483	D133_AF.raw	1	1	P22626
TVLIMELINNVAK	55.72	1456.83	13	0.8	729.424	52.07	0	1	17913	D133_AF.raw	0	0	P06576
HYQINQQWER	55.7	1400.66	10	1	701.337	29.77	122000	1	6682	D133_AF.raw	1	1	P02751
SILFVPTSAPR	55.69	1186.67	11	1.3	594.344	41.46	146000	1	12745	D133_AF.raw	1	1	P14625
TFVNITPAEVGVLVGK	55.65	1642.93	16	-0.2	822.472	48.84	122000	1	16193	D133_AF.raw	1	1	P07737
THNSSLEYNIFEGMEC(+57.02)R	55.44	2085.89	17	0.4	696.304	42.4	177000	1	13205	D133_AF.raw	1	1	Q16555	Carbamidomethylation	C16:Carbamidomethylation:1000.00
GGSFGGR(+14.02)SSGSPYGGGYGSGGGSGGYGSR	55.42	2542.09	29	0.5	848.37	29.48	220000	1	6530	D133_AF.raw	1	1	P51991	Methylation(R)	R7:Methylation(R):50.73
VAVLGASGGIGQPLSLLLK	55.3	1792.08	19	0.1	897.048	51.91	50100	1	17785	D133_AF.raw	1	1	P40926
FADLTDAAAR	55.29	1049.51	10	0.6	525.765	33.86	162000	1	8667	D133_AF.raw	1	1	P14136
DVNAAIATIK	55.2	1014.57	10	0.1	508.293	36.63	109000	1	10151	D133_AF.raw	1	1	Q71U36:P68363:Q9BQE3
KVHVIFNYK	55.16	1146.65	9	0.1	383.226	31.99	1680000	1	7753	D133_AF.raw	1	1	P27797
KEDLVFIFWAPESAPLK	54.94	1989.06	17	2.8	664.029	51.57	132000	1	17542	D133_AF.raw	1	1	P23528
EHALLAYTLGVK	54.92	1313.73	12	1.5	657.875	39.17	169000	1	11448	D133_AF.raw	1	1	P68104
TAVC(+57.02)DIPPR	54.92	1027.51	9	0.1	514.763	28.96	1470000	1	6454	D133_AF.raw	1	1	P07437:Q13885:Q9BVA1:P68371	Carbamidomethylation	C4:Carbamidomethylation:1000.00
TVDNFVALATGEK	54.86	1363.7	13	-0.1	682.856	42.91	68100	1	13525	D133_AF.raw	1	1	P23284
HELQANC(+57.02)YEEVKDR	54.74	1789.81	14	1	597.61	26.24	62600	1	5091	D133_AF.raw	1	1	P23528	Carbamidomethylation	C7:Carbamidomethylation:1000.00
ILGGSVLHLVLALR	54.69	1459.92	14	0.8	730.97	51.69	54200	1	17611	D133_AF.raw	1	1	Q15843
VLYLSAFTSK	54.66	1127.62	10	0.4	564.819	42.89	303000	1	13492	D133_AF.raw	1	1	P04216
GGSGGSYGRGSRGGSGGSYGGGGSGGGYGGGSGSR	54.63	2869.21	35	0.3	718.31	24.66	33400	1	4143	D133_AF.raw	1	1	P35527
VLNNMEIGTSLFDEEGAK	54.62	1965.94	18	0.4	983.975	46.16	23400	1	15068	D133_AF.raw	1	1	P00558
HVTNSPFK	54.59	928.477	8	1	465.246	24.74	33400	1	4211	D133_AF.raw	1	1	Q14315
DC(+57.02)GATWVVLGHSER	54.58	1585.73	14	1	529.585	37.9	95900	1	10886	D133_AF.raw	1	1	P60174	Carbamidomethylation	C2:Carbamidomethylation:1000.00
TSIAIDTIINQK	54.51	1315.73	12	0.9	658.875	40.96	135000	1	12491	D133_AF.raw	1	1	P25705
TITLEVEPSDTIENVK	54.51	1786.92	16	0.6	894.468	41.48	112000	1	12739	D133_AF.raw	1	1	P62987:P62979:P0CG47:P0CG48
HVVFIAQR	54.44	968.556	8	0.5	485.285	28.55	396000	1	6110	D133_AF.raw	1	1	P62081
GFAFVQYVNER	54.38	1328.65	11	0.3	665.333	42.92	123000	1	13578	D133_AF.raw	1	1	P07910
YSAELHVAHWNSAK	54.38	1611.78	14	0.5	538.267	30.84	164000	1	7211	D133_AF.raw	1	1	P00915
LKNLYFLYLIELR	54.34	1696.99	13	1.6	566.672	51.78	45800	1	17674	D133_AF.raw	1	1	Q86YB8:Q96HE7
HVSAYGPGLSHGMVNKPATFTIVTK	54.32	2611.36	25	-0.5	653.846	37.32	195000	1	10507	D133_AF.raw	1	1	Q14315
HEALLYTWLAEHKPLVLC(+57.02)GPPGSGK	54.3	2772.44	25	2.4	694.12	47.18	123000	1	15521	D133_AF.raw	1	1	Q14204	Carbamidomethylation	C18:Carbamidomethylation:1000.00
QGGR(+14.02)GAGATLEHQQEISK	54.24	1879.95	18	1.3	627.658	24.97	76200	1	4371	D133_AF.raw	1	1	Q9Y5S2	Methylation(R)	R4:Methylation(R):1000.00
EITALAPSTMK	54.23	1160.61	11	0.4	581.313	34.83	88800	1	9191	D133_AF.raw	1	1	P60709:P63261
TWNDPSVQQDIK	54.02	1429.68	12	0.4	715.849	34.16	363000	1	8806	D133_AF.raw	1	1	P11021
TVMENFVAFVDK	53.98	1398.69	12	-0.2	700.35	48.78	586000	1	16136	D133_AF.raw	1	1
GRGGPPGQFHDNANGGQNGTVQEIMIPAGK	53.94	3003.44	30	-0.1	751.866	34.62	241000	1	9083	D133_AF.raw	1	1	Q92945
SLYYYIQQDTK	53.93	1420.69	11	1.3	711.352	39.52	224000	1	11689	D133_AF.raw	1	1	P07355:A6NMY6
FQNALLVR	53.88	959.555	8	0.7	480.785	35.78	195000	1	9663	D133_AF.raw	1	1	P02768
GSPLVVISQGK	53.87	1083.63	11	1	542.822	35.37	103000	1	9505	D133_AF.raw	1	1	Q16555
YLTVAAIFR	53.85	1052.6	9	0.2	527.308	46.35	3420000	1	15126	D133_AF.raw	1	1	Q13885:Q9BVA1
IHVC(+57.02)LYFITPTGHSLK	53.63	1884.99	16	0	629.338	41.68	349000	1	12829	D133_AF.raw	1	1	Q92599	Carbamidomethylation	C4:Carbamidomethylation:1000.00
SYQLRPGTMIEWGNYWAR	53.6	2227.06	18	0.8	743.362	46.56	79500	1	15289	D133_AF.raw	1	1	O75323
VLSPADKTNVK	53.42	1170.66	11	1	391.228	24.76	108000	1	4224	D133_AF.raw	1	1	P69905
PPYTVVYFPVR	53.33	1336.72	11	0.7	669.367	44.66	101000	1	14342	D133_AF.raw	1	1	P09211
LIGDAAKNQVALNPQNTVFDAKR	53.24	2482.33	23	0.9	621.59	36.4	1920000	1	10142	D133_AF.raw	2	2	P0DMV9:P0DMV8
GIRPAINVGLSVSR	53.12	1437.84	14	0.9	480.288	35.93	138000	1	10048	D133_AF.raw	1	1	P25705
DAFLGSFLYEYSR	53.09	1566.74	13	0.8	784.375	52.05	0	1	17895	D133_AF.raw	0	0
TVTNAVVTVPAYFNDSQR	53.08	1980.99	18	-0.4	661.337	42.68	84700	1	13402	D133_AF.raw	2	2	P11142
TGLIDYNQLALTAR	52.98	1547.83	14	-0.2	774.923	44.76	43800	1	14424	D133_AF.raw	1	1	P34897
TVTAMDVVYALKR	52.95	1465.8	13	1.1	489.607	42.28	884000	1	13299	D133_AF.raw	2	2	P62805
VGINYQPPTVVPGGDLAK	52.88	1823.98	18	0.8	912.997	41.82	75900	1	13003	D133_AF.raw	1	1	Q71U36:P68363:Q9BQE3:Q9NY65
SVVLMSHLGRPDGVPMPDKYSLEPVAVELK	52.84	3262.71	30	0	816.685	44.83	92100	1	14482	D133_AF.raw	1	1	P00558
VC(+57.02)GR(+14.02)GGGGSFGYSYGGGSGGGFSASSLGGGFGGGSR	52.82	3190.39	36	0.5	1064.47	40.31	0	1	12155	D133_AF.raw	0	0	P35527	Carbamidomethylation; Methylation(R)	C2:Carbamidomethylation:1000.00;R4:Methylation(R):44.14
IHFPLATYAPVISAEK	52.73	1755.96	16	0.4	586.326	43.84	556000	1	13927	D133_AF.raw	1	1	Q71U36:P68363:Q9BQE3
GIYTGLSAGLLR	52.62	1219.69	12	1.8	610.855	43.75	0	1	13989	D133_AF.raw	0	0	Q02978
VAPEEHPVLLTEAPLNPK	52.62	1953.06	18	0.9	652.027	37.65	188000	1	10651	D133_AF.raw	1	1	P60709:P63261
C(+57.02)PEALFQPSFLGMESC(+57.02)GIHETTFNSIMK	52.31	3230.45	28	0.6	1077.83	50.07	0	1	16718	D133_AF.raw	0	0	P60709:P63261	Carbamidomethylation	C1:Carbamidomethylation:1000.00;C16:Carbamidomethylation:1000.00
VFSGLVSTGLK	52.27	1106.63	11	0.7	554.324	39.11	43700	1	11498	D133_AF.raw	1	1	P13639
GC(+57.02)ITIIGGGDTATC(+57.02)C(+57.02)AK	52.16	1753.78	17	0.1	877.897	35.32	134000	1	9451	D133_AF.raw	1	1	P00558	Carbamidomethylation	C2:Carbamidomethylation:1000.00;C14:Carbamidomethylation:1000.00;C15:Carbamidomethylation:1000.00
SGRGGNFGFGDSR(+14.02)GGGGNFGPGPGSNFR	52.16	2685.22	28	1.1	672.312	35.55	2170000	1	9541	D133_AF.raw	1	1	P22626	Methylation(R)	R13:Methylation(R):13.58
YIC(+57.02)DNQDTISSK	51.88	1442.63	12	-0.3	722.324	27.99	80200	1	5813	D133_AF.raw	1	1		Carbamidomethylation	C3:Carbamidomethylation:1000.00
LLGNVLVC(+57.02)VLAHHFGKEFTPPVQAAYQK	51.84	3135.67	28	0.8	628.142	51.08	4330000	1	17201	D133_AF.raw	1	1	P68871	Carbamidomethylation	C8:Carbamidomethylation:1000.00
FQSLGVAFYR	51.73	1186.61	10	0.6	594.314	42.16	262000	1	13094	D133_AF.raw	1	1	P51149
LPHVLLLQLGTTFFK	51.71	1726.02	15	0.3	576.347	51.8	67100	1	17696	D133_AF.raw	1	1	O43809
FSVNLDVK	51.67	920.497	8	1.4	461.256	38.24	3460000	1	11054	D133_AF.raw	1	1	P02511
QYASLTGTQALPPLFSLGYHQSR	51.63	2534.29	23	-1.1	845.77	47.09	145000	1	15508	D133_AF.raw	1	1	Q14697
MLITILGTVKPNANR	51.59	1639.94	15	0.7	547.656	40.95	153000	1	12453	D133_AF.raw	1	1	P17931
QLQSLTC(+57.02)DLESLR	51.57	1561.78	13	-1.2	781.895	44.11	209000	1	14110	D133_AF.raw	1	1	P14136	Carbamidomethylation	C7:Carbamidomethylation:1000.00
FALVFPLMYHTWNGIR	51.41	1964.01	16	0.4	655.679	51.7	89900	1	17626	D133_AF.raw	1	1	Q99643
TNEKVELQELNDR	51.37	1586.79	13	-0.6	794.402	30.03	25100	1	6822	D133_AF.raw	1	1	P08670
VNQPASFAVQLNGAR	51.28	1570.82	15	-0.7	786.418	37.87	34700	1	10811	D133_AF.raw	1	1	Q14315
SKDYEFMWNPHLGYILTC(+57.02)PSNLGTGLR	51.24	3168.52	27	-0.5	793.136	49.23	269000	1	16316	D133_AF.raw	1	1	P12277	Carbamidomethylation	C18:Carbamidomethylation:1000.00
LKPGAPLRPK	51.23	1075.69	10	1.1	359.57	25	24000	1	4394	D133_AF.raw	1	1	P21333
TLAQLNPESSLFIIASK	51.12	1831.01	17	-0.7	916.511	50	32400	1	16697	D133_AF.raw	1	1	P06744
ILALC(+57.02)MGNHELYMR	51.06	1719.83	14	0.2	574.283	41.16	149000	1	12557	D133_AF.raw	1	1	P26038:P35241	Carbamidomethylation	C5:Carbamidomethylation:1000.00
VNQIGSVTESLQAC(+57.02)K	50.96	1632.81	15	0.3	817.415	35.97	81100	1	9780	D133_AF.raw	1	1	P06733	Carbamidomethylation	C14:Carbamidomethylation:1000.00
VNQIGSVTESIQAC(+57.02)K	50.96	1632.81	15	0.3	817.415	35.97	81100	1	9780	D133_AF.raw	1	1	P13929	Carbamidomethylation	C14:Carbamidomethylation:1000.00
VLIAAHGNSLR	50.91	1149.66	11	0.5	384.228	27.59	71900	1	5638	D133_AF.raw	2	2	P15259:P18669
GMDTRGPVPGPR(+14.02)GPIPSGMQGPSPINMGAVVPQGSR	50.83	3567.79	36	0.5	892.954	41.24	229000	1	12648	D133_AF.raw	1	1	P33240	Methylation(R)	R12:Methylation(R):1.34
GLYQGFSVSVQGIIIYR	50.73	1899.03	17	1.1	950.521	51.59	80100	1	17561	D133_AF.raw	1	1	P12236
HVMQPYYK	50.65	1064.51	8	1.4	533.264	26.21	11900	1	5060	D133_AF.raw	1	1	P78527
SGVSLAALKK	50.58	972.597	10	1.4	487.306	28.75	179000	1	6179	D133_AF.raw	1	1	P16403:P10412:P16402
FSVLLLHGIR	50.53	1153.7	10	0.4	577.856	41.88	0	1	12980	D133_AF.raw	0	0	Q96IU4
HGSIIYHPSLLPR	50.46	1488.82	13	1.2	497.281	35.75	128000	1	9670	D133_AF.raw	1	1	O75891
HGSIIYHPSILPR	50.46	1488.82	13	1.2	497.281	35.75	128000	1	9670	D133_AF.raw	1	1	Q3SY69
TPAQFDADELR	50.43	1261.59	11	-0.6	631.804	35.24	117000	1	9405	D133_AF.raw	1	1	P04083
GGSGGSYGGGGSGGGYGGGSGSR	50.38	1790.72	23	0.1	896.367	24.79	21300	1	4255	D133_AF.raw	1	1	P35527
KESYSVYVYK	50.32	1264.63	10	0.6	633.325	30.26	146000	1	6995	D133_AF.raw	1	1	P58876:Q99877:Q99880:Q93079:P62807:O60814:Q5QNW6:Q99879:P57053
GGSAPEGATYAAPR(+14.02)GSSPK	50.31	1773.86	19	0.8	592.296	25.16	11700	1	4553	D133_AF.raw	1	1	Q9UQB3	Methylation(R)	R14:Methylation(R):1000.00
HGEVC(+57.02)PAGWKPGSDTIKPDVQK	50.28	2405.18	22	1.3	602.303	31.28	158000	1	7448	D133_AF.raw	1	1	Q06830	Carbamidomethylation	C5:Carbamidomethylation:1000.00
GNPTVEVDLFTSK	50.23	1405.71	13	-0.6	703.861	42.02	176000	1	13022	D133_AF.raw	1	1	P06733
YMAC(+57.02)C(+57.02)LLYR	50.14	1248.55	9	-0.1	625.28	38.92	642000	1	11327	D133_AF.raw	1	1	Q71U36:P68363:Q9BQE3	Carbamidomethylation	C4:Carbamidomethylation:1000.00;C5:Carbamidomethylation:1000.00
FVTVQTISGTGALR	50.06	1448.8	14	0.4	725.407	39.55	0	1	11741	D133_AF.raw	0	0	P00505
GTFATLSELHC(+57.02)DK	49.99	1477.69	13	0.1	493.57	34.33	1900000	1	8887	D133_AF.raw	2	2	P68871	Carbamidomethylation	C11:Carbamidomethylation:1000.00
TFIAIKPDGVQR	49.87	1343.76	12	0.2	448.926	33.18	160000	1	8353	D133_AF.raw	1	1	P22392:P15531
YLTVATVFR	49.7	1068.6	9	0.8	535.306	42.56	412000	1	13289	D133_AF.raw	1	1	Q13509:Q9BUF5
LHVDPENFR	49.67	1125.56	9	1.1	563.786	31.41	981000	1	7592	D133_AF.raw	2	2	P68871:P02042
HPEYAVSVLLR	49.34	1282.7	11	1.1	642.36	38.33	236000	1	11203	D133_AF.raw	1	1
SGNFGGSR(+14.02)NMGGPYGGGNYGPGGSGGSGGYGGR	49.27	2965.25	33	0.7	989.426	32.45	172000	1	7994	D133_AF.raw	1	1	P22626	Methylation(R)	R8:Methylation(R):18.67
AATPYTVSIYGVIQGYR	49.25	1857.96	17	0.5	929.989	47.82	0	1	15798	D133_AF.raw	0	0	P24821
THTC(+57.02)PPC(+57.02)PAPELLGGPSVFLFPPKPK	49.13	2843.45	26	1.3	711.871	45.6	56900	1	14834	D133_AF.raw	2	2	P01857:P0DOX5	Carbamidomethylation	C4:Carbamidomethylation:1000.00;C7:Carbamidomethylation:1000.00
KGDVVIVLTGWRPGSGFTNTMR	49.07	2390.25	22	0.2	598.571	44	2790000	1	14019	D133_AF.raw	2	2	P14618
TLAYLLPAIVHINHQPYLER	48.99	2360.3	20	-0.5	591.082	46.23	415000	1	15091	D133_AF.raw	2	2	Q92841
LEAENNLAAYR	48.96	1262.63	11	0.2	632.32	32.68	145000	1	8122	D133_AF.raw	1	1	P14136
YYVTIIDAPGHR	48.93	1403.72	12	0.2	468.914	35.9	514000	1	9704	D133_AF.raw	1	1	P68104
TPQAPASANLVGPR(+14.02)	48.89	1391.75	14	0.2	696.883	32.25	32600	1	7931	D133_AF.raw	1	1	Q9UQ35	Methylation(R)	R14:Methylation(R):1000.00
GATVTR(+14.02)GVPPPPTVR	48.68	1517.87	15	0	506.963	28.98	312000	1	6288	D133_AF.raw	1	1	Q07666	Methylation(R)	R6:Methylation(R):90.01
SGR(+14.02)GGNFGFGDSR(+14.02)GGGGNFGPGPGSNFR	48.66	2699.23	28	1.3	675.817	35.65	1000000	1	9598	D133_AF.raw	1	1	P22626	Methylation(R)	R3:Methylation(R):51.87;R13:Methylation(R):35.22
YSQFINFPIYVWSSK	48.54	1877.94	15	0.4	939.975	51.99	185000	1	17843	D133_AF.raw	1	1	P14625
RPC(+57.02)FSALEVDETYVPK	48.4	1909.92	16	0.1	637.649	39.79	59500	1	11867	D133_AF.raw	1	1	P02768	Carbamidomethylation	C3:Carbamidomethylation:1000.00
SYSPYDMLESIR	48.38	1459.67	12	-0.5	730.84	47.73	43100	1	15747	D133_AF.raw	1	1	P07355:A6NMY6
IIKPC(+57.02)NHVLSLSFPIR	48.19	1893.07	16	0.5	632.029	41.19	210000	1	12559	D133_AF.raw	1	1	P00367	Carbamidomethylation	C5:Carbamidomethylation:1000.00
VSAGR(+14.02)GSISSGLEFVSHNPPSEAATPPVAR	48.11	2990.52	30	1.1	748.638	37.5	479000	1	10562	D133_AF.raw	1	1	Q99700	Methylation(R)	R5:Methylation(R):76.36
RPC(+57.02)FSALTPDETYVPK	48.05	1879.91	16	0.5	627.645	37.81	223000	1	10743	D133_AF.raw	1	1		Carbamidomethylation	C3:Carbamidomethylation:1000.00
MC(+57.02)LFAGFQR	48	1128.52	9	1	565.268	43.96	104000	1	14030	D133_AF.raw	1	1	Q00839	Carbamidomethylation	C2:Carbamidomethylation:1000.00
R(+14.02)GGFNTFR	47.98	967.499	8	1	484.757	27.47	406000	1	5688	D133_AF.raw	1	1	P17844	Methylation(R)	R1:Methylation(R):89.21
RSYVSSGEMMVGGLAPGR	47.86	1852.89	18	0.2	618.638	37.51	645000	1	10574	D133_AF.raw	2	2	P14136
AAPAAAAR(+14.02)GAPVAAAALAR	47.69	1659.95	19	1.3	554.326	32.01	79300	1	7791	D133_AF.raw	1	1	Q8N6I1	Methylation(R)	R8:Methylation(R):73.19
ALGVLAQLIWSR	47.46	1325.78	12	1.2	663.899	52.01	0	1	17844	D133_AF.raw	0	0	O75390
TPC(+57.02)EEVYVK	47.42	1123.52	9	0.7	562.769	28.75	43100	1	6219	D133_AF.raw	1	1	Q14315	Carbamidomethylation	C3:Carbamidomethylation:1000.00
GHYTEGAELVDSVLDVVR	47.32	1957.97	18	0.9	653.666	49.46	96800	1	16502	D133_AF.raw	1	1	P07437:Q13885:Q9BVA1:P68371:Q13509
RAPVPVR(+14.02)GGPK	47.31	1146.7	11	0.7	383.24	24.53	148000	1	4029	D133_AF.raw	1	1	Q12906	Methylation(R)	R7:Methylation(R):86.11
HTNYTMEHIR	47.24	1300.6	10	0.5	434.54	25.92	187000	1	4978	D133_AF.raw	1	1	P12814
EAESC(+57.02)DC(+57.02)LQGFQLTHSLGGGTGSGMGTLLISK	47.24	3310.53	32	0.8	1104.52	46.59	280000	1	15256	D133_AF.raw	1	1	P07437:P68371	Carbamidomethylation	C5:Carbamidomethylation:1000.00;C7:Carbamidomethylation:1000.00
EAESC(+57.02)DC(+57.02)LQGFQLTHSLGGGTGSGMGTLLLSK	47.24	3310.53	32	0.8	1104.52	46.59	280000	1	15256	D133_AF.raw	1	1		Carbamidomethylation	C5:Carbamidomethylation:1000.00;C7:Carbamidomethylation:1000.00
LADQC(+57.02)TGLQGFLVFHSFGGGTGSGFTSLLMER	47.21	3389.62	32	0.4	1130.88	52.04	0	1	17877	D133_AF.raw	0	0	Q71U36:P68363:Q9BQE3	Carbamidomethylation	C5:Carbamidomethylation:1000.00
ALANSLAC(+57.02)QGK	47.03	1131.57	11	0	566.793	27.68	31100	1	5643	D133_AF.raw	1	1	P04075	Carbamidomethylation	C8:Carbamidomethylation:1000.00
TYLGNALVC(+57.02)TC(+57.02)YGGSR	46.94	1790.81	16	0.5	896.412	39.81	44800	1	11869	D133_AF.raw	1	1	P02751	Carbamidomethylation	C9:Carbamidomethylation:1000.00;C11:Carbamidomethylation:1000.00
GPPSR(+14.02)GGHMDDGGYSMNFNMSSSR	46.74	2557.05	24	0.5	640.271	33.46	317000	1	8529	D133_AF.raw	1	1	P38159	Methylation(R)	R5:Methylation(R):70.17
VTQSNFAVGYK	46.68	1212.61	11	0.5	607.314	31.72	40200	1	7664	D133_AF.raw	1	1	P21796
MIAGQVLDINLAAEPK	46.52	1681.91	16	0.5	841.961	45.73	16000	1	14919	D133_AF.raw	1	1	P07910
SVTEQGAELSNEER	46.51	1547.71	14	-0.1	774.86	28.1	27400	1	5902	D133_AF.raw	1	1	P63104
NFILDQTNVSAAAQR	46.46	1646.84	15	1.1	824.427	39.72	9620	1	11835	D133_AF.raw	1	1	Q00839
LDQLTANSAR	46.43	1087.56	10	0.7	544.789	26.94	21500	1	5358	D133_AF.raw	1	1	P14136
FPGQLNADLR	46.42	1129.59	10	1.2	565.802	37	58800	1	10363	D133_AF.raw	1	1	P07437:Q13885:Q9BVA1:P68371:Q13509:Q9BUF5
LAVNMVPFPR	46.2	1142.63	10	1.2	572.321	43.29	326000	1	13703	D133_AF.raw	1	1	P07437:Q13885:Q9BVA1:P68371:Q13509:Q9BUF5
HLEINPDHSIIETLR	46.18	1785.94	15	-0.2	596.32	38.66	53300	1	11245	D133_AF.raw	1	1	P07900
TGAIVDVPVGEELLGR	46.14	1623.88	16	1.4	812.95	46.93	35500	1	15409	D133_AF.raw	1	1	P25705
VTFVNFTVTR	45.86	1182.64	10	0.4	592.327	42.35	139000	1	13247	D133_AF.raw	1	1	Q14204
TTPSVVAFTADGER	45.85	1449.71	14	-0.6	725.862	37.53	37500	1	10590	D133_AF.raw	1	1	P38646
SGRGGNFGFGDSRGGGGNFGPGPGSNFRGGSDGYGSGR	45.55	3564.57	38	0.5	892.149	34.64	28300000	1	9219	D133_AF.raw	2	2	P22626
GTFATLSELHC(+57.02)DKLHVDPENFR	45.48	2585.23	22	0.4	647.316	40.3	1100000	1	12107	D133_AF.raw	1	1	P68871	Carbamidomethylation	C11:Carbamidomethylation:1000.00
HDVVFLITK	45.43	1070.61	9	1.3	536.314	37	120000	1	10357	D133_AF.raw	1	1	Q00610
EFTPPVQAAYQK	45.32	1377.69	12	0.7	689.854	35.23	691000	1	9352	D133_AF.raw	1	1	P68871
VTIAQGGVLPNIQAVLLPK	45.31	1930.16	19	0	966.088	51.62	286000	1	17530	D133_AF.raw	1	1	Q99878:Q96KK5:Q16777:Q9BTM1:P20671:P0C0S8:Q6FI13:Q93077:P04908:Q7L7L0
LLLPGELAK	45.29	952.596	9	0.6	477.305	40.13	201000	1	12047	D133_AF.raw	1	1	P58876:Q99877:Q99880:Q93079:P62807:O60814:Q5QNW6:Q99879:P57053:Q16778:P23527:Q8N257:P33778:P06899
SGAFGHLFRPDNFIFGQSGAGNNWAK	45.23	2794.34	26	2.5	699.593	47.34	191000	1	15553	D133_AF.raw	1	1	Q13509
VLTPELYAELR	45.09	1302.72	11	0.6	652.367	43.04	63300	1	13614	D133_AF.raw	1	1	P12277
VPLAGAAGGPGIGR	44.99	1191.67	14	1.4	596.844	31.55	0	1	7610	D133_AF.raw	0	0	P14678
LNC(+57.02)QVIGASVDSHFC(+57.02)HLAWVNTPK	44.96	2752.32	24	1.9	689.089	41.96	302000	1	12998	D133_AF.raw	1	1	Q06830	Carbamidomethylation	C3:Carbamidomethylation:1000.00;C15:Carbamidomethylation:1000.00
NSSYFVEWIPNNVK	44.92	1695.83	14	-0.8	848.919	46.72	523000	1	15293	D133_AF.raw	1	1	P07437:Q13885:Q9BVA1:P68371:Q13509:Q9BUF5
LVINGNPITIFQER	44.79	1612.89	14	0.3	807.454	47.86	25400	1	15823	D133_AF.raw	1	1	P04406
TIAPALVSK	44.71	898.549	9	1.2	450.282	31.41	670000	1	7496	D133_AF.raw	1	1	P06733
GGSGGSHGGGSGFGGESGGSYGGGEEASGSGGGYGGGSGKSSHS	44.7	3620.43	44	-0.4	906.114	25.54	61600	1	4776	D133_AF.raw	1	1	P35527
R(+14.02)PFFPFHSPSR	44.64	1387.71	11	0.9	463.579	35.06	173000	1	9269	D133_AF.raw	1	1	P02511	Methylation(R)	R1:Methylation(R):80.30
TIQVDNTDAEGR	44.49	1317.62	12	0.3	659.816	27.11	19500	1	5423	D133_AF.raw	1	1	P28838
IYFMAGSSR	44.38	1030.49	9	0.7	516.253	35.81	151000	1	9650	D133_AF.raw	1	1	P14625
MPPPLPTR	44.34	907.495	8	0.9	454.755	31.57	243000	1	7669	D133_AF.raw	1	1	P14136
GPPR(+14.02)GGPGGELPR	44.19	1259.67	13	-0.1	420.898	25.76	267000	1	4818	D133_AF.raw	1	1	Q04637	Methylation(R)	R4:Methylation(R):74.48
TLSGGIQVNGPR	44.15	1197.65	12	0	599.831	31.03	12100	1	7367	D133_AF.raw	1	1	P32455
LTTPTYGDLNHLVSATMSGVTTC(+57.02)LR	44.09	2707.33	25	-0.8	903.45	51.2	196000	1	17343	D133_AF.raw	1	1	P07437:Q13885:Q9BVA1:P68371	Carbamidomethylation	C23:Carbamidomethylation:1000.00
FTASAGIQVVGDDLTVTNPK	44.06	2032.05	20	0	1017.03	44.34	0	1	14250	D133_AF.raw	0	0	P06733
GSLGGGFSSGGFSGGSFSR	44.03	1706.76	19	-0.2	854.389	39.96	15100	1	11985	D133_AF.raw	1	1	P13645
YIC(+57.02)ENQDSISSK	44.02	1442.63	12	-0.4	722.324	27.47	36500	1	5553	D133_AF.raw	1	1	P02768	Carbamidomethylation	C3:Carbamidomethylation:1000.00
LC(+57.02)TVATLR	43.99	932.511	8	0.8	467.263	30.66	368000	1	7082	D133_AF.raw	1	1	P02768	Carbamidomethylation	C2:Carbamidomethylation:1000.00
WQALLVQIR	43.92	1125.67	9	0.7	563.841	44.85	79400	1	14413	D133_AF.raw	1	1	Q14204
RGGPPFAFVEFEDPRDAEDAVYGR	43.86	2696.26	24	1.5	675.074	45.71	184000	1	14862	D133_AF.raw	1	1	Q07955
FAC(+57.02)HSASLTVR	43.69	1247.61	11	0.1	416.877	27.3	160000	1	5488	D133_AF.raw	1	1	Q15233	Carbamidomethylation	C3:Carbamidomethylation:1000.00
HDLGHFMLR	43.49	1124.55	9	1.7	375.86	33.52	209000	1	8515	D133_AF.raw	1	1	P30043
GLSATVTGGQK	43.45	1017.55	11	0.9	509.781	26.05	25700	1	4992	D133_AF.raw	1	1	P60201
ALSIGFETC(+57.02)R	43.4	1152.56	10	-0.7	577.287	38.51	136000	1	11136	D133_AF.raw	1	1	P16070	Carbamidomethylation	C9:Carbamidomethylation:1000.00
TQPVQGEPSAPK	43.35	1237.63	12	0.2	619.822	25.18	9090	1	4557	D133_AF.raw	1	1	P13591
YREWHHFLVVNMK	42.95	1757.88	13	0.5	440.478	40.66	3540000	1	12628	D133_AF.raw	1	1	P30086
APSWFDTGLSEMR	42.95	1495.68	13	-0.2	748.845	47.02	206000	1	15520	D133_AF.raw	1	1	P02511
TIAMDGTEGLVR	42.9	1261.63	12	0.4	631.824	36.97	86900	1	10356	D133_AF.raw	1	1	P06576
TQIDHYVGIAR	42.84	1271.66	11	1.9	424.896	31.34	627000	1	7486	D133_AF.raw	1	1	O95197
AGAGLSSLC(+57.02)LVLSTRPHS	42.78	1824.95	18	1.1	609.325	42.68	216000	1	13391	D133_AF.raw	1	1	O95865	Carbamidomethylation	C9:Carbamidomethylation:1000.00
LAQSNGWGVMVSHR	42.76	1540.76	14	0	514.593	31.03	138000	1	7468	D133_AF.raw	1	1	P13929
FNNWGGSLSLGHPFGATGC(+57.02)R	42.76	2133.98	20	1.5	712.335	41.79	201000	1	12909	D133_AF.raw	1	1	P55084	Carbamidomethylation	C19:Carbamidomethylation:1000.00
LFDQFFGEHLLESDLFPTSTSLSPFYLRPPSFLR	42.74	4003.02	34	1.1	1001.76	52.13	0	1	17978	D133_AF.raw	0	0	P02511
IVAPPGGR(+14.02)ANITSLG	42.62	1435.81	15	-0.3	718.914	36.63	1380000	1	10072	D133_AF.raw	1	1	Q16555	Methylation(R)	R8:Methylation(R):1000.00
SHC(+57.02)IAEVEKDAIPENLPPLTADFAEDKDVC(+57.02)K	42.61	3510.66	31	0.6	703.141	42.57	0	1	13355	D133_AF.raw	0	0		Carbamidomethylation	C3:Carbamidomethylation:1000.00;C30:Carbamidomethylation:1000.00
C(+57.02)C(+57.02)SGAIIVLTK	42.51	1220.63	11	0.4	611.32	36.56	183000	1	10082	D133_AF.raw	1	1	P14618	Carbamidomethylation	C1:Carbamidomethylation:1000.00;C2:Carbamidomethylation:1000.00
LSEGR(+14.02)GLPPPPR	42.44	1288.73	12	0	430.582	27.65	273000	1	5623	D133_AF.raw	1	1	Q14151	Methylation(R)	R5:Methylation(R):61.82
DSTLIMQLLR	42.43	1188.65	10	0.9	595.335	52.02	0	1	17863	D133_AF.raw	0	0	P62258:P63104:P61981
GPGGPR(+14.02)GGLGGGMR	42.4	1238.63	14	1.2	413.885	25.35	101000	1	4666	D133_AF.raw	1	1	Q13283	Methylation(R)	R6:Methylation(R):49.35
SSFYVNGLTLGGQK	42.01	1469.75	14	1.6	735.884	41.53	121000	1	12817	D133_AF.raw	1	1	P07737
GAPTTSLISVAVTK	41.86	1343.77	14	0.9	672.891	39.39	91700	1	11659	D133_AF.raw	1	1	P49419
FYALSASFEPFSNK	41.78	1606.77	14	-1.1	804.39	47.46	376000	1	15598	D133_AF.raw	1	1	P27797
TGSETPQAPMSGVGPVSGGPGGFGR(+14.02)GSQGGNFEGPNKR	41.74	3628.71	38	0.3	908.184	35.18	6360000	1	9320	D133_AF.raw	1	1	Q8WXF1	Methylation(R)	R25:Methylation(R):14.10
TALLSLFGIPLWYHSQSPR	41.72	2185.17	19	1.3	729.398	52	35100	1	17854	D133_AF.raw	1	1	Q9UH99
GLDVDSLVIEHIQVNK	41.71	1777.96	16	1.5	593.661	44.44	27200	1	14299	D133_AF.raw	1	1	P18621
GGPPGPPISR(+14.02)	41.65	947.519	10	0.2	474.767	28.59	216000	1	6068	D133_AF.raw	1	1	Q04637	Methylation(R)	R10:Methylation(R):1000.00
TGTITTFEHAHNMR	41.62	1614.76	14	0.1	539.26	28.62	54100	1	6170	D133_AF.raw	1	1	P13639
EGTR(+14.02)GSSWSAQNTPR	41.55	1646.78	15	1.3	549.933	25.26	12700	1	4619	D133_AF.raw	1	1	Q69YN4	Methylation(R)	R4:Methylation(R):71.87
TGVHHYSGNNIELGTAC(+57.02)GK	41.37	2013.93	19	0	672.318	27.88	34300	1	5753	D133_AF.raw	1	1	P62888	Carbamidomethylation	C17:Carbamidomethylation:1000.00
ILISLATGHR	41.26	1079.65	10	1.1	540.83	33.86	105000	1	8679	D133_AF.raw	1	1	P08133
GYISPYFINTSK	41.12	1388.7	12	0.5	695.356	41.31	41000	1	12726	D133_AF.raw	1	1	P10809
SAADLISQAR	41.1	1030.54	10	0.9	516.278	33.18	32200	1	8362	D133_AF.raw	1	1	Q14195
TSATWLALSR	41.07	1104.59	10	1	553.304	40.35	46000	1	12123	D133_AF.raw	1	1	P05023
SSGPTSLFAVTVAPPGAR	41.04	1713.9	18	-1.7	857.958	44.84	19300	1	14488	D133_AF.raw	1	1	Q00839
TFTAWC(+57.02)NSHLR	41.04	1391.64	11	1.1	464.888	33.13	101000	1	8357	D133_AF.raw	1	1	P12814	Carbamidomethylation	C6:Carbamidomethylation:1000.00
HVPVVYVDYPGPASLTQIYGTFNR	41	2692.36	24	1	898.463	49.35	0	1	16407	D133_AF.raw	0	0	Q14204
IAVAAQNC(+57.02)YK	40.98	1136.56	10	0.2	569.29	27.15	36300	1	5446	D133_AF.raw	1	1	P60174	Carbamidomethylation	C8:Carbamidomethylation:1000.00
VVNVSSIMSVR	40.98	1189.65	11	0.7	595.832	40.3	220000	1	12118	D133_AF.raw	1	1	P16152
YLYEIAR	40.84	926.486	7	0.3	464.25	35.32	329000	1	9414	D133_AF.raw	1	1	P02768
TVIDYNGER	40.82	1065.51	9	-0.7	533.761	29.13	88900	1	6385	D133_AF.raw	1	1	P07237
QKLQDETNLR	40.67	1243.65	10	0.5	415.558	25.22	13300	1	4598	D133_AF.raw	1	1	P14136
GMGPGTPAGYGR(+14.02)GR	40.51	1346.65	14	1.1	449.892	25.92	2680000	1	4887	D133_AF.raw	1	1	P23246	Methylation(R)	R12:Methylation(R):0.00
AITIANQTNC(+57.02)PLYITK	40.5	1819.95	16	-0.1	910.982	39.78	40200	1	11851	D133_AF.raw	1	1	Q16555	Carbamidomethylation	C10:Carbamidomethylation:1000.00
LGGSAVISLEGKPL	40.41	1339.77	14	-0.4	670.893	42.15	29000	1	13171	D133_AF.raw	1	1	P23528
IGGIGTVPVGR	40.39	1024.6	11	1.5	513.309	34.36	0	1	8954	D133_AF.raw	0	0	P68104
HLQLAIR	40.31	849.518	7	0.6	425.767	29.93	9990000	1	6843	D133_AF.raw	1	1	Q99878:Q96KK5:Q16777:Q9BTM1:P20671:P0C0S8:Q6FI13:Q93077:P04908:Q7L7L0
SAPPTR(+14.02)GPPPSYGGSSR	40.26	1683.83	17	1	562.285	25	200000	1	4405	D133_AF.raw	1	1	P38159	Methylation(R)	R6:Methylation(R):55.92
HVVPNEVVVQR	39.96	1274.71	11	0.7	638.362	28.2	41900	1	5939	D133_AF.raw	1	1	P06396
DYFFALAHTVR	39.96	1338.67	11	-0.2	670.343	43.68	31000	1	13984	D133_AF.raw	1	1	P11216
TFSVWYVPEVTGTHK	39.94	1749.87	15	2	584.299	43.44	114000	1	13787	D133_AF.raw	1	1	P21333
TPEVTC(+57.02)VVVDVSHEDPEVK	39.93	2138.02	19	0.4	713.681	39	98600	1	11424	D133_AF.raw	1	1	P01857:P0DOX5	Carbamidomethylation	C6:Carbamidomethylation:1000.00
TPVLSAEASTAK	39.91	1173.62	12	1.4	587.82	28.52	8370	1	6122	D133_AF.raw	1	1	P24821
TQTVC(+57.02)NFTDGALVQHQEWDGK	39.86	2433.1	21	-0.2	812.041	38.86	123000	1	11291	D133_AF.raw	1	1	Q01469	Carbamidomethylation	C5:Carbamidomethylation:1000.00
SISLTRPGSSSLSSGPNSILC(+57.02)R(+14.02)	39.75	2289.17	22	2	764.067	38.56	37300	1	11145	D133_AF.raw	1	1	Q9HB19	Carbamidomethylation; Methylation(R)	C21:Carbamidomethylation:1000.00;R22:Methylation(R):66.02
HRPELIDYGK	39.64	1226.64	10	0.8	409.888	29.26	53900	1	6492	D133_AF.raw	1	1	P12814
VFIGNLNTLVVK	39.59	1315.79	12	0.5	658.901	44.81	83100	1	14457	D133_AF.raw	1	1	P07910
ISEQFTAMFR	39.57	1228.59	10	1.4	615.304	43.06	63200	1	13605	D133_AF.raw	1	1	P07437:Q13885:Q9BVA1:P68371:Q13509
TTPSYVAFTDTERLIGDAAKNQVALNPQNTVFDAKR	39.56	3951.01	36	0.4	791.21	47.59	1310000	1	15593	D133_AF.raw	2	2	P0DMV9:P0DMV8
LGLALNYSVFYYEIQNAPEQAC(+57.02)HLAK	39.49	3011.49	26	-1	1004.83	51.35	84500	1	17435	D133_AF.raw	1	1	P61981	Carbamidomethylation	C22:Carbamidomethylation:1000.00
SLHTLFGDELC(+57.02)K	39.4	1418.69	12	-1.6	710.349	38.64	84900	1	11263	D133_AF.raw	1	1		Carbamidomethylation	C11:Carbamidomethylation:1000.00
TTQFSC(+57.02)TLGEK	39.34	1270.59	11	1	636.301	30.75	342000	1	7126	D133_AF.raw	1	1	Q01469	Carbamidomethylation	C6:Carbamidomethylation:1000.00
ILYHGYSLLYVQGNER	39.3	1923.98	16	2.9	642.337	39.83	123000	1	11879	D133_AF.raw	1	1	P02462
VDFSLAGALNAGFK	39.2	1408.73	14	1.5	705.376	49.98	84900	1	16675	D133_AF.raw	2	2	P14136
SSAEVIAQAR	39.06	1030.54	10	0.3	516.278	26.51	35700	1	5192	D133_AF.raw	1	1	Q16555
LFQFHFHWGSTNEHGSEHTVDGVK	39.02	2795.28	24	0.4	560.064	41.49	8760000	1	12887	D133_AF.raw	3	3	P00915
ESESC(+57.02)DC(+57.02)LQGFQLTHSLGGGTGSGMGTLLISK	38.94	3326.52	32	-1.6	1109.85	46.53	164000	1	15244	D133_AF.raw	1	1	Q13885:Q9BVA1	Carbamidomethylation	C5:Carbamidomethylation:1000.00;C7:Carbamidomethylation:1000.00
GALQNIIPASTGAAK	38.93	1410.78	15	0	706.399	38.11	369000	1	11059	D133_AF.raw	1	1	P04406
ELGVGIALR	38.85	926.555	9	0.7	464.285	39.73	220000	1	11782	D133_AF.raw	1	1	Q01469
VPGLYYFTYHASSR	38.79	1659.8	14	1.5	554.276	40.55	65600	1	12301	D133_AF.raw	1	1	P02746
IAVVGAGIGGSAVAHFLQQHFGPR	38.69	2388.28	24	-0.1	598.078	48.06	42600	1	15922	D133_AF.raw	1	1	Q8NBM8
QLIVGVNK	38.66	869.533	8	1.2	435.774	30.69	128000	1	7096	D133_AF.raw	1	1	P68104
TC(+57.02)VADESAENC(+57.02)DK	38.6	1497.57	13	-0.5	749.793	24.81	21500	1	4283	D133_AF.raw	1	1	P02768	Carbamidomethylation	C2:Carbamidomethylation:1000.00;C11:Carbamidomethylation:1000.00
IVVVTAGVR	38.53	912.576	9	0.3	457.295	32.01	173000	1	7792	D133_AF.raw	1	1	P07195
HLQLAVR	38.29	835.503	7	0	418.759	27.53	266000	1	5587	D133_AF.raw	1	1	Q8IUE6
LHVDPENFRLLGNVLVC(+57.02)VLAHHFGKEFTPPVQAAYQK	38.06	4243.22	37	1	708.211	51.89	0	1	17750	D133_AF.raw	0	0	P68871	Carbamidomethylation	C17:Carbamidomethylation:1000.00
TLSDYNIQK	37.91	1080.55	9	0.4	541.28	30.12	413000	1	6821	D133_AF.raw	1	1	P62987:P62979:P0CG47:P0CG48
TLGLYGK	37.86	750.428	7	1.4	376.222	31.17	70100	1	7443	D133_AF.raw	1	1	P09211
TGSETPQAPMSGVGPVSGGPGGFGR(+14.02)GSQGGNFEGPNK	37.72	3472.61	37	-0.3	1158.54	37.42	616000	1	10533	D133_AF.raw	2	2	Q8WXF1	Methylation(R)	R25:Methylation(R):1000.00
GHLQIAAC(+57.02)PNQDPLQGTTGLIPLLGIDVWEHAYYLQYK	37.69	4292.17	38	-0.4	1074.05	52.11	0	1	17953	D133_AF.raw	0	0	P04179	Carbamidomethylation	C8:Carbamidomethylation:1000.00
C(+57.02)C(+57.02)AADDKEAC(+57.02)FAVEGPK	37.66	1926.79	17	0.7	643.271	30.52	70500	1	7078	D133_AF.raw	1	1		Carbamidomethylation	C1:Carbamidomethylation:1000.00;C2:Carbamidomethylation:1000.00;C10:Carbamidomethylation:1000.00
HFNAPSHIR	37.58	1077.55	9	-0.1	360.19	25.22	55600	1	4574	D133_AF.raw	1	1	P61254
TDDYLDQPC(+57.02)LETVNR	37.57	1837.82	15	-0.2	919.915	39.88	11200	1	11953	D133_AF.raw	1	1	P31150	Carbamidomethylation	C9:Carbamidomethylation:1000.00
GGGGNFGPGPGSNFR	37.5	1376.62	15	0.1	689.318	31.97	37500	1	7793	D133_AF.raw	1	1	P22626
HAFC(+57.02)TDYATGFC(+57.02)C(+57.02)HC(+57.02)QSK	37.4	2248.85	18	0	750.625	31.22	13900	1	7462	D133_AF.raw	1	1	Q14112	Carbamidomethylation	C4:Carbamidomethylation:1000.00;C12:Carbamidomethylation:1000.00;C13:Carbamidomethylation:1000.00;C15:Carbamidomethylation:1000.00
GTLSGWILSK	37.4	1060.59	10	0	531.303	43.1	145000	1	13635	D133_AF.raw	1	1	P27824
AIGGGLSSVGGGSSTIK	37.39	1446.77	17	-0.1	724.391	33.15	62400	1	8380	D133_AF.raw	1	1	P48668:P02538
TFEINPR	37.38	875.45	7	-0.3	438.732	31.51	197000	1	7513	D133_AF.raw	1	1	P14625
TLVLLMGK	37.35	873.536	8	1.4	437.776	41.29	354000	1	12635	D133_AF.raw	1	1	P07737
HLLPVETQR	37.34	1091.61	9	0.1	546.812	29.18	57300	1	6431	D133_AF.raw	1	1	Q14204
SGRGGNFGFGDSRGGGGNFGPGPGSNFR(+14.02)GGSDGYGSGR	37.32	3578.58	38	-0.1	716.723	34.75	11500000	1	9238	D133_AF.raw	1	1	P22626	Methylation(R)	R28:Methylation(R):1.05
TVFDEAIR	37.16	949.487	8	0.3	475.751	36.16	149000	1	9919	D133_AF.raw	1	1	P63000
YLLVEFYAPWC(+57.02)GHC(+57.02)K	37.04	1941.89	15	1.7	648.305	47.85	368000	1	15830	D133_AF.raw	1	1	P07237	Carbamidomethylation	C11:Carbamidomethylation:1000.00;C14:Carbamidomethylation:1000.00
NLDIERPTYTNLNR	36.99	1717.87	14	-0.5	573.632	34.48	243000	1	8968	D133_AF.raw	1	1	Q71U36:P68363:Q9BQE3:Q9NY65
YNPTWHC(+57.02)IVGR	36.95	1401.66	11	0.6	468.228	34.3	126000	1	8899	D133_AF.raw	1	1	P63167:Q96FJ2	Carbamidomethylation	C7:Carbamidomethylation:1000.00
NVIGLQMGTNR(+14.02)GASQAGMTGYGMPR	36.95	2580.24	25	0.8	861.087	39.13	88700	1	11491	D133_AF.raw	1	1	P37802	Methylation(R)	R11:Methylation(R):18.18
TFYSC(+57.02)TTEGR	36.93	1220.51	10	0.1	611.264	28.57	155000	1	6083	D133_AF.raw	1	1	P02751	Carbamidomethylation	C5:Carbamidomethylation:1000.00
MREIVHIQAGQC(+57.02)GNQIGAK	36.68	2109.06	19	0.4	528.272	31.01	46500	1	7351	D133_AF.raw	1	1	P07437:Q13885:Q9BVA1:Q13509	Carbamidomethylation	C12:Carbamidomethylation:1000.00
MREIVHLQAGQC(+57.02)GNQIGAK	36.68	2109.06	19	0.4	528.272	31.01	46500	1	7351	D133_AF.raw	1	1	P68371	Carbamidomethylation	C12:Carbamidomethylation:1000.00
TYETTLEK	36.68	983.481	8	0.4	492.748	26.82	343000	1	5293	D133_AF.raw	1	1	P02768
FGQGGAGPVGGQGPR(+14.02)GMGPGTPAGYGR	36.63	2456.18	27	1.1	819.734	32.99	153000	1	8278	D133_AF.raw	1	1	P23246	Methylation(R)	R15:Methylation(R):19.27
TNEQMHQLVAAYK	36.61	1531.75	13	0.5	511.589	31.42	110000	1	7500	D133_AF.raw	1	1	P08133
GVPPPPTVR(+14.02)	36.49	932.544	9	-0.3	467.279	28.72	42300	1	6217	D133_AF.raw	1	1	Q07666	Methylation(R)	R9:Methylation(R):1000.00
SSQSSSQQFSGIGR(+14.02)	36.46	1468.69	14	0.6	735.353	29.62	230000	1	6572	D133_AF.raw	1	1	Q92841	Methylation(R)	R14:Methylation(R):1000.00
GASQAGMTGYGMPR(+14.02)QIL	36.39	1750.85	17	1	876.433	41.37	105000	1	12686	D133_AF.raw	1	1	P37802	Methylation(R)	R14:Methylation(R):1000.00
LEEEGQSLKDEMAR	36.37	1633.76	14	1.3	545.595	29.8	61600	1	6725	D133_AF.raw	1	1	P14136
SYVSSGEMMVGGLAPGR(+14.02)R	36.27	1866.91	18	0.6	623.31	37.75	3380000	1	11010	D133_AF.raw	2	2	P14136	Methylation(R)	R17:Methylation(R):12.28
NDPPMEAAGFTAQVIILNHPGQISAGYAPVLDC(+57.02)HTAHIAC(+57.02)K	36.21	4384.12	41	1.4	877.832	46.27	0	1	15144	D133_AF.raw	0	0	P68104	Carbamidomethylation	C33:Carbamidomethylation:1000.00;C40:Carbamidomethylation:1000.00
TQAYQDQKPGTSGLR	36.06	1648.82	15	1.1	550.614	25.15	11300	1	4533	D133_AF.raw	1	1	P36871
GYAFITFC(+57.02)GK	35.95	1162.55	10	0.1	582.281	42.82	97600	1	13486	D133_AF.raw	1	1	O43390	Carbamidomethylation	C8:Carbamidomethylation:1000.00
TPFLLSGTSYK	35.9	1212.64	11	2	607.328	40.29	76800	1	12122	D133_AF.raw	1	1	P55084
HPYYNSISK	35.68	1107.53	9	1	554.775	25.02	18100	1	4445	D133_AF.raw	1	1	P15259
R(+14.02)SYVSSGEMMVGGLAPGRR	35.61	2023.01	19	0.5	675.344	35.46	360000	1	9471	D133_AF.raw	1	1	P14136	Methylation(R)	R1:Methylation(R):24.85
SYR(+14.02)GGGGGGGGWR	35.48	1236.57	13	0.7	413.199	24.81	152000	1	4320	D133_AF.raw	1	1	P62995	Methylation(R)	R3:Methylation(R):72.22
VHLTPEEK	35.36	951.503	8	1.6	476.759	24.69	26500	1	4182	D133_AF.raw	1	1	P68871:P02042
ELQEQLAR	35.32	985.519	8	0.5	493.767	27.87	44100	1	5740	D133_AF.raw	1	1	P14136
VNNSSLIGVGYTQTLRPGVK	35.3	2102.15	20	-0.5	701.723	37.42	44800	1	10529	D133_AF.raw	1	1	P45880
GGNFGFGDSRGGGGNFGPGPGSNFRGGSDGYGSGR	35.26	3264.41	35	0	817.11	36.14	2390000	1	9843	D133_AF.raw	1	1	P22626
VSGHLHVGHTPVHFTDVDLHAYIVGNDGR	35.21	3148.56	29	1	630.72	43.02	0	1	13616	D133_AF.raw	0	0	Q14112
RPPSAFFLFC(+57.02)SEHRPK	35.21	1974.99	16	-0.1	494.754	39.26	115000	1	11560	D133_AF.raw	1	1	P26583	Carbamidomethylation	C10:Carbamidomethylation:1000.00
LIALLEVLSQK	35.18	1225.76	11	0.9	613.89	51.96	0	1	17812	D133_AF.raw	0	0	Q14315:P21333
HNFTPLAR	35.11	954.504	8	0.4	478.259	27.45	80100	1	5569	D133_AF.raw	1	1	P42765
AVFPSIVGRPR	35.1	1197.7	11	0.2	599.856	34.87	175000	1	9192	D133_AF.raw	1	1	P60709:P63261
YHTSQSGDEMTSLSEYVSR	35.05	2175.94	19	0	726.32	37.52	32200	1	10590	D133_AF.raw	1	1	P08238
LVVEC(+57.02)VMNNVTC(+57.02)TR	34.97	1693.8	14	0.8	847.905	40.55	32700	1	12267	D133_AF.raw	1	1	Q01469	Carbamidomethylation	C5:Carbamidomethylation:1000.00;C12:Carbamidomethylation:1000.00
SSSMSVTGGRGGPR(+14.02)PVSSSIDPSLLSTK	34.94	2760.41	28	1.6	921.144	35.72	0	1	9682	D133_AF.raw	0	0	Q8NEY1	Methylation(R)	R14:Methylation(R):0.00
TFHETLDC(+57.02)C(+57.02)GSSTLTALTTSVLK	34.93	2541.21	23	-0.3	848.077	45.74	164000	1	14884	D133_AF.raw	1	1	P60033	Carbamidomethylation	C8:Carbamidomethylation:1000.00;C9:Carbamidomethylation:1000.00
MSEGR(+14.02)GLPPPPR	34.58	1306.68	12	0.5	436.568	27.02	166000	1	5381	D133_AF.raw	1	1	Q15424	Methylation(R)	R5:Methylation(R):71.72
HSVGVVIGR	34.55	922.535	9	0.8	462.275	26.64	130000	1	5253	D133_AF.raw	1	1	Q92945
ESYSVYVYK	34.31	1136.54	9	0.6	569.277	35.09	316000	1	9290	D133_AF.raw	1	1	P58876:Q99877:Q99880:Q93079:P62807:O60814:Q5QNW6:Q99879:P57053
MLLYTEVTR	34.24	1124.59	9	-1	563.302	38.97	62200	1	11383	D133_AF.raw	1	1	P31150
MGSR(+14.02)AGGPTTPLSPTR	34.17	1598.82	16	-0.5	533.947	27.54	109000	1	5606	D133_AF.raw	1	1	P20700	Methylation(R)	R4:Methylation(R):100.30
AIGVLTSGGDAQGM(+4.02)NAAVR(+14.02)	34.17	1804.94	19	2.6	903.478	45.84	0	1	14954	D133_AF.raw	0	0	P17858	13C(1) 2H(3) Silac label; Methylation(R)	M14:13C(1) 2H(3) Silac label:1000.00;R19:Methylation(R):1000.00
SISISVAR(+14.02)GGGR	34.12	1172.66	12	1.1	587.339	28.06	362000	1	5785	D133_AF.raw	1	1	P04264	Methylation(R)	R8:Methylation(R):38.03
TLHPDLGTDKDKEQWK	34	1909.95	16	1.6	637.659	28.94	47500	1	6312	D133_AF.raw	1	1	P00338
TIIPLISQC(+57.02)TPK	33.97	1369.76	12	-0.2	685.889	41.67	440000	1	12874	D133_AF.raw	1	1	P40926	Carbamidomethylation	C9:Carbamidomethylation:1000.00
KIESLEEEIR	33.92	1244.66	10	0	623.338	31.93	30800	1	7751	D133_AF.raw	1	1	P14136
SREVSGFR(+14.02)GGGGGPAYGPPPSLHAR	33.89	2479.25	25	0.4	620.819	31.67	64600	1	7611	D133_AF.raw	1	1	Q96T58	Methylation(R)	R8:Methylation(R):0.00
LAPITSDPTEATAVGAVEASFK	33.83	2174.11	22	1.7	1088.06	47.85	235000	1	15763	D133_AF.raw	2	2	P14618
VNPC(+57.02)IGGVILFHETLYQK	33.8	2087.09	18	0.9	696.704	44.66	78700	1	14345	D133_AF.raw	1	1	P04075	Carbamidomethylation	C4:Carbamidomethylation:1000.00
SPFSVAVSPSLDLSK	33.77	1532.81	15	-1.3	767.411	44.77	18500	1	14446	D133_AF.raw	1	1	P21333
YRPGTVALR	33.76	1031.59	9	0.1	516.801	26.99	313000	1	5353	D133_AF.raw	1	1	Q6NXT2:P68431:P84243:Q71DI3:Q16695
TTTAAAVASTGPSSR	33.69	1376.69	15	1.5	689.353	25.58	3480	1	4791	D133_AF.raw	1	1	P27816
RAVLSPGSVFSPGR(+14.02)GASFLFPPAESLSPEEPR	33.67	3354.74	32	-0.2	839.691	47.98	55800	1	15858	D133_AF.raw	1	1	P27987	Methylation(R)	R14:Methylation(R):0.35
ASR(+14.02)GGGNHQNNYQPY	33.59	1675.75	15	0.7	559.589	24.81	122000	1	4268	D133_AF.raw	1	1	O14979	Methylation(R)	R3:Methylation(R):1000.00
ISVIVETVYTHVLHPYPTQITQSEK	33.53	2881.52	25	0.4	721.388	45.42	146000	1	14739	D133_AF.raw	1	1	P04843
KESYSIYVYK	33.37	1278.65	10	0.9	640.333	32.16	92100	1	8025	D133_AF.raw	1	1	Q16778:P23527:Q8N257:P33778:P06899
LVAASQAALGL	33.36	1012.59	11	1.6	507.304	44.94	99100	1	14570	D133_AF.raw	1	1	P02768
SYTITGLQPGTDYK	33.29	1542.76	14	0.1	772.386	37.96	22100	1	10880	D133_AF.raw	1	1	P02751
VFLENVIR	33.16	988.571	8	0.7	495.293	41.1	200000	1	12577	D133_AF.raw	1	1	P62805
HHGPQTLYLPVTLSSIPVFQR	33.16	2389.29	21	-1.2	797.437	49.68	26900	1	16541	D133_AF.raw	1	1	Q14697
LATFWYYAK	33.12	1161.59	9	1.4	581.801	44.2	93000	1	14258	D133_AF.raw	1	1	O75964
RPAQSVNR(+14.02)GGMTR	33.1	1442.75	13	0.7	481.925	24.48	135000	1	3993	D133_AF.raw	1	1	Q86V81	Methylation(R)	R8:Methylation(R):23.70
MSSTFIGNSTAIQELFKR	33.04	2029.03	18	0.6	677.351	45.34	17800	1	14769	D133_AF.raw	1	1	Q13509
VDPVNFK	32.97	817.433	7	0.6	409.724	30.85	94600	1	7199	D133_AF.raw	1	1	P69905
AGGLLGAGPDPR(+14.02)GGGPMGPGSGPNLR	32.93	2328.18	26	0.6	777.066	37.95	353000	1	10925	D133_AF.raw	1	1	P0CG12	Methylation(R)	R12:Methylation(R):8.82
SGRGGNFGFGDSR(+14.02)GGGGNFGPGPGSNFRGGSDGYGSGR	32.9	3578.58	38	-0.6	895.652	34.76	14900000	1	9432	D133_AF.raw	2	2	P22626	Methylation(R)	R13:Methylation(R):1.51
GGGGNFGPGPGSNFR(+14.02)GGSDGYGSGR	32.87	2284	25	-0.4	762.341	31.17	2560000	1	7344	D133_AF.raw	2	2	P22626	Methylation(R)	R15:Methylation(R):16.78
YHTINGHNAEVR	32.84	1409.68	12	0.8	470.901	24.65	8330	1	4131	D133_AF.raw	1	1	P22626
GGSGGSYGRGSR(+14.02)GGSGGSYGGGGSGGGYGGGSGSR	32.83	2883.23	35	-0.2	721.814	24.69	12400	1	4187	D133_AF.raw	1	1	P35527	Methylation(R)	R12:Methylation(R):5.08
SRNTDEMVELRILLQSKNAGAVIGK	32.75	2741.49	25	0.3	686.379	43.95	158000	1	14028	D133_AF.raw	1	1	P61978
ILQLC(+57.02)MGNHELYMR	32.75	1776.85	14	0.6	593.29	40.64	27700	1	12365	D133_AF.raw	1	1	P15311	Carbamidomethylation	C5:Carbamidomethylation:1000.00
MVVNEGSDGGQSVYHVHLHVLGGR	32.71	2546.24	24	0.6	510.257	36.47	100000	1	10083	D133_AF.raw	1	1	P49773
GGNFGFGDSR(+14.02)GGGGNFGPGPGSNFRGGSDGYGSGR	32.68	3278.43	35	-0.2	820.614	36.27	4160000	1	10286	D133_AF.raw	1	1	P22626	Methylation(R)	R10:Methylation(R):4.22
TGTLTTNQMSVC(+57.02)R	32.65	1467.68	13	1.2	734.849	30.2	22000	1	6913	D133_AF.raw	1	1	Q93084:P16615	Carbamidomethylation	C12:Carbamidomethylation:1000.00
VGDTSLDPNDFDFTVTGR(+14.02)GSPSR	32.6	2453.15	23	1.1	818.723	42.24	626000	1	13116	D133_AF.raw	1	1	P51608	Methylation(R)	R18:Methylation(R):6.71
LLLQVQHASK	32.6	1135.67	10	1.5	379.565	28.6	400000	1	6116	D133_AF.raw	2	2	P05141:P12236
AALQVPEHTAFGTR	32.5	1496.77	14	0.1	499.932	26.61	16900	1	5251	D133_AF.raw	1	1	Q96JQ0
NQVALNPQNTVFDAK	32.29	1657.84	15	-1.2	829.928	38.05	36700	1	10861	D133_AF.raw	1	1	P0DMV9:P0DMV8
RPHFFFPK	32.25	1074.58	8	1	359.2	35.69	618000	1	9686	D133_AF.raw	1	1	P10909
TLHNLVIQYASQGR	32.18	1598.85	14	1	533.959	36.68	0	1	10183	D133_AF.raw	0	0	Q9H0B6:Q07866
LFYADHPFIFLVR	32.15	1636.88	13	1.5	546.634	49.72	172000	1	16517	D133_AF.raw	1	1	P50454
TNQELQEINR	32.15	1243.62	10	1.3	622.816	28.17	146000	1	5862	D133_AF.raw	1	1	P07355:A6NMY6
GGALLTSTSGPGFHLMLPFITSYK	32.12	2494.29	24	0.3	832.438	51.72	0	1	17634	D133_AF.raw	0	0	O94905
EELLSFMGAEEAAPDPAGVGR(+14.02)GGGVAGPPSGGGGQPQWQK	31.91	3861.84	40	-1.5	966.465	45.52	8270	1	14789	D133_AF.raw	1	1	Q9NRF2	Methylation(R)	R21:Methylation(R):1000.00
VVSVLTVVHQDWLNGK	31.85	1792.98	16	0.8	598.669	45.23	158000	1	14670	D133_AF.raw	1	1	P01859
HVLVTLGEK	31.74	994.581	9	1.7	498.299	29.17	139000	1	6398	D133_AF.raw	1	1	P60660
SGVSLAALK	31.48	844.502	9	1.4	423.259	34.11	47100	1	8823	D133_AF.raw	1	1	P16403:P10412:P16402
LFFLQVK	31.38	893.537	7	0.2	447.776	45.14	1400000	1	14574	D133_AF.raw	1	1	P26038:P35241:P15311
LLC(+57.02)GLLAER	31.36	1043.58	9	1.4	522.798	40.89	29100	1	12476	D133_AF.raw	1	1	P14174	Carbamidomethylation	C3:Carbamidomethylation:1000.00
SISISVARGGGR(+14.02)	31.34	1172.66	12	1.1	587.339	28.06	362000	1	6087	D133_AF.raw	1	1	P04264	Methylation(R)	R12:Methylation(R):0.00
LYSVSYLLK	31.32	1084.62	9	1	543.316	42.96	0	1	13582	D133_AF.raw	0	0	P21333
VLPGIAAAFHPGLAAAASAR	31.31	1860.04	20	-0.4	931.025	45.89	0	1	14971	D133_AF.raw	0	0	P00505
SSGPYGGGGQYFAKPR(+14.02)NQGGYGGSSSSSSYGSGR	31.22	3317.47	34	2	830.377	30.18	110000	1	6969	D133_AF.raw	1	1	P09651	Methylation(R)	R16:Methylation(R):40.70
SR(+14.02)GFAGLHPIPPQGGK	31.16	1631.89	16	0.4	408.98	31.08	494000	1	7480	D133_AF.raw	2	2	Q9NX05	Methylation(R)	R2:Methylation(R):1000.00
LVNELTEFAK	31.14	1162.62	10	2.2	582.32	39.82	89200	1	11843	D133_AF.raw	1	1
STNVTVAAAR(+14.02)GIK	31.13	1300.75	13	0	434.589	27.19	309000	1	5510	D133_AF.raw	2	2	Q5BKZ1	Methylation(R)	R10:Methylation(R):1000.00
TVPFC(+57.02)STFAAFFTR	31.11	1650.79	14	0.4	826.401	52	83400	1	17860	D133_AF.raw	1	1	P29401	Carbamidomethylation	C5:Carbamidomethylation:1000.00
SSFSRVSGSPSSGFR(+14.02)SQSWSRGSPSTVSSSYK	31.11	3369.6	32	-0.5	843.406	40.38	14600	1	12238	D133_AF.raw	1	1	P07197	Methylation(R)	R15:Methylation(R):7.40
GMGPGTPAGYGR(+14.02)GREEYEGPNKKPR	31.05	2674.3	25	0.8	535.868	28.25	3500000	1	6048	D133_AF.raw	1	1	P23246	Methylation(R)	R12:Methylation(R):0.00
GAPLVVIC(+57.02)QGK	31.04	1140.63	11	0.3	571.324	35.2	41800	1	9407	D133_AF.raw	1	1	Q14195	Carbamidomethylation	C8:Carbamidomethylation:1000.00
TNVNGGAIALGHPLGGSGSR	31.01	1833.94	20	-0.2	612.322	32.34	22400	1	7950	D133_AF.raw	1	1	P42765
TNVLGHLQQGGAPTPFDR	31	1906.96	18	1.2	636.663	37.55	30400	1	10639	D133_AF.raw	1	1	P17858
TIPIDGDFFSYTR	30.94	1530.74	13	-0.3	766.375	47.8	21600	1	15805	D133_AF.raw	1	1	P05091
SADTLWGIQK	30.91	1117.58	10	-1	559.795	38.65	52400	1	11243	D133_AF.raw	1	1	P00338
PMFIVNTNVPR	30.87	1286.68	11	1.6	644.349	40.48	467000	1	12157	D133_AF.raw	1	1	P14174
LNFAVASR	30.86	876.482	8	0.1	439.248	33.53	0	1	8553	D133_AF.raw	0	0	P30101
AGEAPTENPAPPTQQSSAE	30.84	1880.84	19	0.4	941.427	30.48	27900	1	7018	D133_AF.raw	1	1	P16989
TTLSTR(+14.02)GPPRGGPGGELPRGPAGLGPR	30.79	2624.43	27	1.3	525.893	33.07	71900	1	8395	D133_AF.raw	1	1	Q04637	Methylation(R)	R6:Methylation(R):0.00
HSTIFENLANK	30.68	1272.65	11	0.5	637.331	33.12	0	1	8358	D133_AF.raw	0	0	P02787
ARGGC(+57.02)PGGEATLSQPPPR	30.67	1806.88	18	1.4	603.301	25.94	9840	1	4942	D133_AF.raw	1	1	P20290	Carbamidomethylation	C5:Carbamidomethylation:1000.00
FFVGGNWK	30.63	953.476	8	1.6	477.746	39.71	199000	1	11793	D133_AF.raw	1	1	P60174
TGSETPQAPMSGVGPVSGGPGGFGR(+14.02)GSQGGNFEGPNKRR	30.62	3784.81	39	0.9	757.97	34.11	4510000	1	8782	D133_AF.raw	1	1	Q8WXF1	Methylation(R)	R25:Methylation(R):1.84
IHAC(+57.02)LYFIAPTGHSLK	30.6	1826.95	16	-1.4	609.99	38.63	73700	1	11212	D133_AF.raw	1	1	Q9NVA2	Carbamidomethylation	C4:Carbamidomethylation:1000.00
LVIITAGAR	30.6	912.576	9	0.6	457.295	34.56	515000	1	8969	D133_AF.raw	1	1	P00338
SYVSSGEMMVGGLAPGRR	30.6	1852.89	18	0.6	618.638	37.93	574000	1	10950	D133_AF.raw	1	1	P14136
GGGGNFGPGPGSNFR(+14.02)GGSDGYGSGR(+14.02)	30.55	2298.02	25	-0.4	767.012	31.45	19700	1	7573	D133_AF.raw	1	1	P22626	Methylation(R)	R15:Methylation(R):1000.00;R25:Methylation(R):1000.00
HLGVC(+57.02)ISVANNR	30.52	1338.68	12	0.4	447.235	31.21	69800	1	7299	D133_AF.raw	2	2	O43390	Carbamidomethylation	C5:Carbamidomethylation:1000.00
HIGVC(+57.02)ISVANNR	30.52	1338.68	12	0.4	447.235	31.21	69800	1	7299	D133_AF.raw	2	2		Carbamidomethylation	C5:Carbamidomethylation:1000.00
HTFGLVQSK	30.46	1015.54	9	0.8	508.78	27.83	89800	1	5723	D133_AF.raw	1	1	Q6UW68
KAPGGPMLLPQTYGAR(+14.02)GK	30.39	1855.01	18	1.3	619.346	32.4	22400	1	8023	D133_AF.raw	1	1	Q15020	Methylation(R)	R16:Methylation(R):1000.00
VNFAMNVGK	30.36	978.496	9	1	490.256	34.54	209000	1	8996	D133_AF.raw	1	1	P14618
HLIVLINK	30.3	948.612	8	1.3	475.314	33.42	122000	1	8499	D133_AF.raw	1	1	P15170:Q8IYD1
SLHTLFGDKLC(+57.02)TVATLR	30.16	1931.03	17	1.4	644.685	41.51	43100	1	12699	D133_AF.raw	1	1	P02768	Carbamidomethylation	C11:Carbamidomethylation:1000.00
FLTWILNR	30.13	1061.6	8	1	531.809	48.04	37700	1	15868	D133_AF.raw	1	1	O43776
NLQEAEEWYK	30.11	1308.6	10	1.8	655.308	37.62	10600	1	10682	D133_AF.raw	1	1	P08670
EVMFPPGTR(+14.02)	30.02	1046.52	9	0.7	524.269	35.43	289000	1	9725	D133_AF.raw	1	1	Q96DH6	Methylation(R)	R9:Methylation(R):1000.00
MLVVLLQANR	29.95	1155.68	10	0.3	578.847	43.16	112000	1	13682	D133_AF.raw	1	1	P08758
IFNLYPR	29.92	921.507	7	-0.1	461.761	39.81	108000	1	11833	D133_AF.raw	1	1	Q14195
HVTFNQVK	29.84	971.519	8	0.9	486.767	25.08	39100	1	4495	D133_AF.raw	1	1	P23381
TTPSYVAFTDTERLIGDAAKNQVALNPQNTVFDAK	29.8	3794.91	35	0.8	949.736	49.26	305000	1	16457	D133_AF.raw	1	1	P0DMV9:P0DMV8
SRFWYFVSQLKK	29.74	1587.86	12	1.9	530.294	43.16	165000	1	13707	D133_AF.raw	1	1	Q02543
SGYLLPDTK	29.71	992.518	9	1.2	497.267	34.5	39600	1	9023	D133_AF.raw	1	1	P14625
NLHQSGFSLSGAQIDDNIPR	29.71	2168.06	20	2.3	723.696	39.14	0	1	11510	D133_AF.raw	0	0	Q16555
EQYQQQQQWGSR(+14.02)	29.67	1578.72	12	-0.4	790.366	28.79	310000	1	6180	D133_AF.raw	1	1	Q14103	Methylation(R)	R12:Methylation(R):1000.00
KQTALVELLK	29.61	1141.71	10	0.5	571.861	36.39	39700	1	10057	D133_AF.raw	1	1
HILANFK	29.43	841.481	7	1.3	421.748	29.12	132000	1	6583	D133_AF.raw	1	1	Q56UQ5:P13693
WLLLTGISAQQNR	29.33	1498.83	13	0.6	750.42	46.84	258000	1	15464	D133_AF.raw	1	1	Q00610
SC(+57.02)C(+57.02)DYALHVDITHWNDSVK	29.24	2319	19	0.5	580.759	40.19	224000	1	12104	D133_AF.raw	1	1	Q14195	Carbamidomethylation	C2:Carbamidomethylation:1000.00;C3:Carbamidomethylation:1000.00
VATVSLPR	29.13	841.502	8	1.5	421.759	31.18	1460000	1	7485	D133_AF.raw	1	1
VHVIFNYK	29.12	1018.56	8	0.5	510.288	32.42	145000	1	7959	D133_AF.raw	1	1	P27797
LRVDPVNFK	29.11	1086.62	9	1.8	544.317	33.01	159000	1	8260	D133_AF.raw	1	1	P69905
YNGVFQEC(+57.02)C(+57.02)QAEDK	29.1	1746.7	14	0.8	874.357	32.23	0	1	7925	D133_AF.raw	0	0		Carbamidomethylation	C8:Carbamidomethylation:1000.00;C9:Carbamidomethylation:1000.00
TPVEVPVGGFK	29.06	1128.62	11	0.8	565.317	37.34	7060	1	10508	D133_AF.raw	1	1	Q15149
VEFPR(+14.02)SGRGTGRGGGGGGGGGAPR	28.92	2169.09	24	0.3	434.825	25.72	1110000	1	4978	D133_AF.raw	2	2	Q07955	Methylation(R)	R5:Methylation(R):12.33
QGLGPSGTSGAR	28.91	1086.54	12	0.7	544.279	40.71	863000	1	12457	D133_AF.raw	1	1	Q9Y5Q8
YVATLGVEVHPLVFHTNR	28.86	2051.1	18	-0.1	513.781	39.72	108000	1	11808	D133_AF.raw	1	1	P62826
TYGFHFTTPALVVEK	28.83	1708.88	15	-0.2	570.635	42.64	60300	1	13347	D133_AF.raw	1	1	O43237
SFVLNLGK	28.78	876.507	8	1.7	439.262	40.01	300000	1	11993	D133_AF.raw	1	1	P09382
AAFTEC(+57.02)C(+57.02)QAADK	28.77	1370.56	12	0.2	686.287	26.71	11200	1	5280	D133_AF.raw	1	1	P02768	Carbamidomethylation	C6:Carbamidomethylation:1000.00;C7:Carbamidomethylation:1000.00
GAPGGR(+14.02)GAQLSVPSPAR	28.7	1590.86	17	0.4	531.294	29.13	49500	1	6372	D133_AF.raw	1	1	Q99501	Methylation(R)	R6:Methylation(R):44.44
HYYEVSC(+57.02)HDQGLC(+57.02)R	28.65	1822.75	14	-1	608.591	27.74	32400	1	5720	D133_AF.raw	1	1	Q92499	Carbamidomethylation	C7:Carbamidomethylation:1000.00;C13:Carbamidomethylation:1000.00
HMYHSLYLK	28.62	1190.59	9	-0.3	397.871	31.14	224000	1	7432	D133_AF.raw	1	1	P84098
TATESFASDPILYRPVAVALDTK	28.54	2464.28	23	-0.1	822.436	45.93	376000	1	15050	D133_AF.raw	1	1	P14618
VEFPR(+14.02)SGR(+14.02)GTGR(+14.02)GGGGGGGGGAPR	28.5	2197.12	24	0.9	440.432	26.11	164000	1	4963	D133_AF.raw	1	1	Q07955	Methylation(R)	R5:Methylation(R):47.77;R8:Methylation(R):63.73;R12:Methylation(R):60.67
SLYASSPGGVYATR(+14.02)SSAVR	28.44	1941.99	19	0.7	648.338	31.71	732000	1	7632	D133_AF.raw	1	1	P08670	Methylation(R)	R14:Methylation(R):26.93
HQLYIDETVNSNIPTNLR	28.39	2126.08	18	0.9	709.7	39.17	97900	1	11493	D133_AF.raw	1	1	P02675
YTLNNWLATVTLGQAGMHATYYHK	28.37	2752.34	24	-0.8	689.092	47.75	160000	1	15668	D133_AF.raw	1	1	O96008
LFDQAFGLPR	28.33	1162.61	10	0.6	582.314	45.12	23900	1	14599	D133_AF.raw	1	1	P04792
TIAQDYGVLK	28.2	1106.6	10	-0.1	554.306	35.78	261000	1	9654	D133_AF.raw	1	1	Q06830
SVSIGYLLVK	28.19	1077.64	10	-0.1	539.829	43.79	37000	1	14013	D133_AF.raw	1	1	P08572
VLQLYQITQINHGLMMVGPSGSGK	28.07	2570.34	24	-0.2	857.785	46.87	5750	1	15403	D133_AF.raw	1	1	Q14204
ESYSIYVYK	28.06	1150.55	9	0.4	576.285	37.22	348000	1	10403	D133_AF.raw	1	1	Q16778:P23527:Q8N257:P33778:P06899
HLILVVNYSC(+57.02)PNHYEDYVHR	27.88	2527.21	20	0.7	632.809	38.66	0	1	11248	D133_AF.raw	0	0	Q7L014	Carbamidomethylation	C10:Carbamidomethylation:1000.00
AVQGGGATPVVGAVQGPVPGMPPMTQAPR(+14.02)	27.87	2740.42	29	1.6	914.481	43.85	0	1	14035	D133_AF.raw	0	0	P09012	Methylation(R)	R29:Methylation(R):1000.00
GFGFVLFK	27.79	913.506	8	-0.2	457.76	48.76	271000	1	16127	D133_AF.raw	1	1	O14979:Q14103
ESTLHLVLR	27.72	1066.61	9	0.1	534.314	34.36	181000	1	9033	D133_AF.raw	1	1	P62987:P62979:P0CG47:P0CG48
HAEMVHTGLK	27.72	1121.57	10	0.6	374.863	24.89	20500	1	4338	D133_AF.raw	1	1	Q01518
HGTDDGVVWMNWK	27.67	1543.69	13	1.1	515.57	41.55	14900	1	12826	D133_AF.raw	1	1	P02675
NPASRPPASGRGER(+14.02)APPAKNTSPGPVSSPGR	27.65	3065.59	31	-0.2	614.125	25.66	149000	1	4746	D133_AF.raw	1	1	Q9H6K5	Methylation(R)	R14:Methylation(R):5.16
MGAGMGFGLER(+14.02)	27.6	1138.53	11	1.2	570.271	39.61	142000	1	11744	D133_AF.raw	1	1	P52272	Methylation(R)	R11:Methylation(R):1000.00
DKGVNSFMVYMAYK	27.51	1651.77	14	0.6	551.599	43.51	21700	1	13849	D133_AF.raw	1	1	Q14195
TYGVSFFLVK	27.47	1159.63	10	2.2	580.822	47.31	104000	1	15546	D133_AF.raw	1	1	Q9Y4G6:Q9Y490
LGALLGPGADHPQDLR	27.41	1628.86	16	-0.1	543.962	31.23	48900	1	7479	D133_AF.raw	1	1	A6NHZ5
WVPAGGSTGFSR(+18.04)VHIYHHTGNNTFR	27.4	2815.4	25	-1.3	470.239	33.52	0	1	8551	D133_AF.raw	0	0	Q8N8S7	Methyl:2H(3)13C(1)	R12:Methyl:2H(3)13C(1):7.62
AIGGGLSSVGGGSSTIKYTTTSSSSRK	27.39	2545.3	27	0.7	637.332	30.6	41200	1	7079	D133_AF.raw	1	1	P48668:P02538
RILISLATGHR	27.39	1235.75	11	1	412.923	32.65	91500	1	8213	D133_AF.raw	1	1	P08133
TIITYPWFQNSSVILFLNKK	27.38	2411.33	20	-0.8	804.782	51.78	279000	1	17701	D133_AF.raw	1	1	P29992:P50148
HNNLYLVATSK	27.27	1258.67	11	-1.1	630.34	30.64	17300	1	7109	D133_AF.raw	1	1	Q9BXS5
AGAGSATLSMAYAGAR	27.26	1453.7	16	1.2	727.857	35.28	48800	1	9473	D133_AF.raw	1	1	P40926
AYHEQLSVAEITNAC(+57.02)FEPANQMVK	27.2	2749.28	24	-0.7	917.435	42.67	0	1	13413	D133_AF.raw	0	0	Q71U36:P68363	Carbamidomethylation	C15:Carbamidomethylation:1000.00
R(+14.02)GGMIVDPLR	27.17	1126.63	10	1.1	564.322	34.14	198000	1	8842	D133_AF.raw	1	1	Q92530	Methylation(R)	R1:Methylation(R):45.63
GGNFGFGDSR(+14.02)GGGGNFGPGPGSNFR(+14.02)GGSDGYGSGR	27.12	3292.44	35	-0.2	824.118	36.45	243000	1	10020	D133_AF.raw	1	1	P22626	Methylation(R)	R10:Methylation(R):13.10;R25:Methylation(R):13.58
R(+14.02)GGPISFSSSR	27.1	1163.6	11	0.6	582.81	27.6	58100	1	5641	D133_AF.raw	1	1	P35580	Methylation(R)	R1:Methylation(R):31.03
GR(+14.02)GLSLSR	27.01	858.504	8	0.9	430.259	25.36	794000	1	4648	D133_AF.raw	1	1	P02686	Methylation(R)	R2:Methylation(R):101.67
TNFFGTR	26.91	841.408	7	-0.5	421.711	33.37	186000	1	8472	D133_AF.raw	1	1	P16152
SGRGGNFGFGDSR	26.8	1312.59	13	1.2	438.538	28.04	63900	1	5779	D133_AF.raw	1	1	P22626
SGRGTGR(+14.02)GGGGGGGGGAPRGR	26.75	1753.88	21	-0.4	439.477	24.47	54000	1	3959	D133_AF.raw	1	1	Q07955	Methylation(R)	R7:Methylation(R):0.00
LLALYNQGHIKPHIDSVWPFEK	26.73	2604.39	22	1.4	652.105	45.25	109000	1	14678	D133_AF.raw	1	1	Q99536
TIFQGIAAK	26.73	947.544	9	0.8	474.78	35.65	44700	1	9657	D133_AF.raw	1	1	P52209
FGQGGAGPVGGQGPR	26.69	1340.66	15	0.3	671.337	27.93	12400	1	5814	D133_AF.raw	1	1	P23246
WFYIASAFR	26.63	1159.58	9	-0.1	580.798	48.5	253000	1	15996	D133_AF.raw	1	1	P19652:P02763
AGNNMLLVGVHGPR	26.59	1433.76	14	-0.7	478.926	34.45	47300	1	9020	D133_AF.raw	1	1	P21333
ALSLSQASHAVAALPSGDR	26.55	1849.96	19	-0.7	617.662	32.54	76600	1	8077	D133_AF.raw	1	1	Q9BRZ2
HNIQALLK	26.45	935.555	8	0.9	468.785	29.68	58800	1	6658	D133_AF.raw	1	1	P10644
C(+57.02)SVPVDQASESLLK	26.42	1531.76	14	-0.9	766.884	36.14	12200	1	9912	D133_AF.raw	1	1	Q9NVN8	Carbamidomethylation	C1:Carbamidomethylation:1000.00
HFTILDAPGHK	26.41	1234.65	11	0.6	412.556	30.87	37900	1	7180	D133_AF.raw	1	1	P15170:Q8IYD1
YFPTQALNFAFK	26.4	1445.73	12	-1.5	723.873	48.77	0	1	16178	D133_AF.raw	0	0	P05141:P12236
AITIASQTNC(+57.02)PLYVTK	26.38	1778.92	16	0.3	890.469	38.65	32200	1	11242	D133_AF.raw	1	1	Q14195	Carbamidomethylation	C10:Carbamidomethylation:1000.00
GAAPPPPPVPR(+14.02)	26.37	1068.61	11	0.8	535.312	29.71	22700	1	6668	D133_AF.raw	1	1	Q07666	Methylation(R)	R11:Methylation(R):1000.00
SNYNFEKPFLWLAR	26.29	1783.9	14	-0.7	595.642	47.3	99700	1	15559	D133_AF.raw	1	1	P62826
RTSSM(+4.02)DSPGGPLPLPLLKGGVGGAGATPR	26.28	2749.48	29	-0.9	688.377	46.43	0	1	15217	D133_AF.raw	0	0	O95704	13C(1) 2H(3) Silac label	M5:13C(1) 2H(3) Silac label:1000.00
GPKGTEEPVK	26.13	1040.55	10	1.1	521.283	29.96	12200	1	6804	D133_AF.raw	1	1	Q14315
IGVTVLSR	26.07	843.518	8	0.7	422.766	33.84	99200	1	8636	D133_AF.raw	1	1	P16152
LGVTVLSR	26.07	843.518	8	0.7	422.766	33.84	99200	1	8636	D133_AF.raw	1	1
YSFC(+57.02)TDHTVLVQTR	26.07	1725.81	14	0.9	576.279	35.29	51700	1	9452	D133_AF.raw	1	1	P02751	Carbamidomethylation	C4:Carbamidomethylation:1000.00
RGGPISFSSSR	25.93	1149.59	11	0.5	575.802	27.38	156000	1	5634	D133_AF.raw	1	1	P35580
TAVAPSAVNLADPR(+14.02)TPTAPAVNLAGAR	25.92	2614.42	27	-0.7	872.48	39.92	16700	1	11984	D133_AF.raw	1	1	Q9UQ35	Methylation(R)	R14:Methylation(R):8.39
GTVRPANDFNPDADAK	25.88	1686.8	16	2.6	563.274	27.65	9230	1	5668	D133_AF.raw	1	1	P08133
TFVSGAC(+57.02)DASIK	25.78	1254.59	12	0.9	628.303	31.53	142000	1	7558	D133_AF.raw	1	1	P62879	Carbamidomethylation	C7:Carbamidomethylation:1000.00
LALDIEIATYRK	25.74	1404.8	12	1.9	469.274	40.12	158000	1	12232	D133_AF.raw	2	2	P14136
IVYFILSR	25.46	1009.6	8	0.3	505.805	44.94	137000	1	14494	D133_AF.raw	1	1	Q4KMQ2
TIFAYFTGSK	25.41	1133.58	10	1.5	567.796	44.92	94500	1	14496	D133_AF.raw	1	1	Q9BRA2
LREFEGR(+14.02)GGPLPQEEKWR	25.35	2197.14	18	1.6	550.293	33.9	159000	1	8682	D133_AF.raw	1	1	Q9C0J8	Methylation(R)	R7:Methylation(R):0.00
SAGLAFSLYQAMAK	25.34	1456.74	14	-2.7	729.375	48	65600	1	15877	D133_AF.raw	1	1	P50454
LGAPQQPGPGPPPSR(+14.02)	25.27	1468.78	15	0.1	735.397	35.55	0	1	9591	D133_AF.raw	0	0	Q96CX2	Methylation(R)	R15:Methylation(R):1000.00
HGESAWNLENR	25.23	1311.6	11	0.3	438.206	29.61	29000	1	6603	D133_AF.raw	1	1	P18669
GPPLDGRGGR(+14.02)DPRGIDAR	25.16	1874.98	18	0.9	469.753	26.56	1450000	1	5238	D133_AF.raw	1	1	P33240	Methylation(R)	R10:Methylation(R):0.00
MTMITDSLAVVLQRR	25.15	1732.93	15	0.8	578.652	48.66	76400	1	16145	D133_AF.raw	1	1
GGR(+14.02)AVAPRMGLR	24.94	1253.71	12	0.8	418.912	36.12	5700	1	9892	D133_AF.raw	1	1	Q9Y3Y2	Methylation(R)	R3:Methylation(R):51.63
GESGPSGAAGPPGPK	24.82	1264.6	15	1.2	633.31	28.71	0	1	6202	D133_AF.raw	0	0	P20908
LVTDLTK	24.74	788.464	7	1.1	395.24	29.49	60200	1	6638	D133_AF.raw	1	1	P02768
REPLGVC(+57.02)VGIGAWNYPFQIASWK	24.73	2647.34	23	-2	883.451	51.56	74500	1	17548	D133_AF.raw	1	1	P49189	Carbamidomethylation	C7:Carbamidomethylation:1000.00
GSGGGSSGGSIGGR(+14.02)GSSSGGVK	24.73	1764.84	22	1.2	589.286	24.5	36300	1	4012	D133_AF.raw	1	1	P04264	Methylation(R)	R14:Methylation(R):1000.00
HAIPIIK	24.72	790.506	7	0.7	396.261	28.42	28600	1	6037	D133_AF.raw	1	1	O00571
HGNQYIQVNEPWKR	24.51	1767.88	14	0.8	590.301	32.67	44800	1	8202	D133_AF.raw	1	1	P56192
GGRGR(+18.04)GGPMGR(+18.04)GGYGGGGSGGGGR	24.5	2069.02	24	-0.4	690.681	41.85	46300	1	12944	D133_AF.raw	1	1	P35637	Methyl:2H(3)13C(1)	R5:Methyl:2H(3)13C(1):0.00;R11:Methyl:2H(3)13C(1):5.09
YAAELHLVHWNTK	24.37	1580.81	13	0.9	527.944	35.92	189000	1	9742	D133_AF.raw	1	1	P00918
VIPELNGK	24.35	868.502	8	-0.2	435.258	30.59	9260	1	7096	D133_AF.raw	1	1	P04406
HGILQFLHIYHAVK	24.35	1674.94	14	-0.2	419.741	45.37	150000	1	14662	D133_AF.raw	1	1	P48506
VSWEGAAAAAAGPGAGGSALRC(+57.02)R	24.3	2142.04	23	-0.5	1072.03	52.08	0	1	17922	D133_AF.raw	0	0	P15863	Carbamidomethylation	C22:Carbamidomethylation:1000.00
SFYPEEVSSMVLTK	24.21	1615.78	14	-0.5	808.897	45.39	72100	1	14748	D133_AF.raw	1	1	P11142
TEYLSNADER	24.17	1196.53	10	1.6	599.274	27.67	14800	1	5654	D133_AF.raw	1	1	Q14204
GFGDGYNGYGGGPGGGNFGGSPGYGGGR(+14.02)	24.17	2508.05	28	0.1	837.023	39.91	138000	1	11912	D133_AF.raw	1	1	P22626	Methylation(R)	R28:Methylation(R):1000.00
AGFLPRPSGAAPPAPPTR(+18.04)	24.1	1776.99	18	-0.5	889.502	49.91	0	1	16653	D133_AF.raw	0	0	Q9ULI4	Methyl:2H(3)13C(1)	R18:Methyl:2H(3)13C(1):6.83
ALQASALNAWR	24.04	1199.64	11	2.2	600.829	38.62	23800	1	11219	D133_AF.raw	1	1	P09972
KVAPAPAVVK	23.99	978.623	10	0.9	490.319	34.39	10700	1	8982	D133_AF.raw	1	1	P62424
ALSRQEMQEVQSSR	23.93	1647.8	14	2.9	550.275	26.64	3500	1	5267	D133_AF.raw	1	1	P22626
QTVAVGVIK	23.92	913.56	9	0.8	457.788	30.79	81900	1	7128	D133_AF.raw	1	1	P68104
GGAGGDTKGGAAGPGPGRLR	23.84	1707.88	20	1	570.3	50.14	0	1	16756	D133_AF.raw	0	0	Q9P2C4
DGVRGLTGPIGPPGPAGAPGDKGESGPSGPAGPTGARGAPGDR(+18.04)	23.8	3834.93	43	-0.7	767.992	36.7	246000	1	10149	D133_AF.raw	1	1	P02452	Methyl:2H(3)13C(1)	R43:Methyl:2H(3)13C(1):3.38
SAAQAAAQTNSNAAGKQLR	23.79	1856.95	19	0.5	619.989	24.84	7410	1	4308	D133_AF.raw	1	1	Q8NC51
ATGGGLSSVGGGSSTIKYTTTSSSSRK	23.77	2533.26	27	0.6	634.323	28.05	23800	1	5844	D133_AF.raw	1	1	P04259
HTHLAVSFGR	23.69	1123.59	10	-0.7	375.537	30.12	14500	1	6861	D133_AF.raw	1	1	Q969P0
YVETPR(+14.02)VHISSVR	23.67	1555.85	13	0.1	389.969	29.79	123000	1	6701	D133_AF.raw	1	1	P07196	Methylation(R)	R6:Methylation(R):44.44
STPEYFAER	23.6	1098.5	9	0.3	550.256	31.57	37400	1	7596	D133_AF.raw	1	1	P08133
GGGAGEQPPPPSAR(+14.02)	23.57	1290.63	14	1.1	646.324	24.81	2150	1	4291	D133_AF.raw	1	1	Q8TDC3	Methylation(R)	R14:Methylation(R):1000.00
SSGSPYGGGYGSGGGSGGYGSRR(+14.02)	23.56	2079.9	23	0.1	694.307	26.29	44300	1	5127	D133_AF.raw	1	1	P51991	Methylation(R)	R23:Methylation(R):0.00
TNRPPLSLSR	23.55	1139.64	10	-0.1	380.888	27.63	66000	1	5633	D133_AF.raw	1	1	Q07020
QLFHPEQLITGK	23.4	1409.77	12	1.5	470.93	38.85	103000	1	11418	D133_AF.raw	1	1	Q71U36:P68363:Q9BQE3:Q9NY65
QIFHPEQLITGK	23.4	1409.77	12	1.5	470.93	38.85	103000	1	11418	D133_AF.raw	1	1
HAAGAANAGPAAGPR(+18.04)	23.29	1305.68	15	-0.4	653.847	37.24	0	1	10483	D133_AF.raw	0	0	Q8N5H3	Methyl:2H(3)13C(1)	R15:Methyl:2H(3)13C(1):1000.00
TIAQGNLSNTDVQAAK	23.23	1629.83	16	0.1	815.923	29.96	9370	1	6795	D133_AF.raw	1	1	P22695
RWNFIYVFHTLGQYFQK	23.23	2246.14	17	-0.2	749.721	51.9	112000	1	17766	D133_AF.raw	1	1	Q14956
AKHHAISAK	23.18	961.546	9	1.3	321.523	24.44	18200	1	3948	D133_AF.raw	1	1	P27824
TITTAYYR	23.17	987.503	8	1.6	494.759	29.82	72100	1	6675	D133_AF.raw	1	1	Q92930
MASGVAVSDGVIK	23.17	1232.64	13	0	617.329	49.79	0	1	16597	D133_AF.raw	0	0	P23528
IGFPWSEIR	23.16	1103.58	9	1.1	552.796	46.79	0	1	15371	D133_AF.raw	0	0	P26038:P35241:P15311
NMGGPYGGGNYGPGGSGGSGGYGGR(+14.02)SR	23.08	2446.05	27	0.2	816.356	29.66	437000	1	6613	D133_AF.raw	1	1	P22626	Methylation(R)	R25:Methylation(R):13.67
DGQVINETSQHHDDLE	23.08	1835.79	16	2.3	612.939	28.85	19400	1	6274	D133_AF.raw	1	1	P08670
SR(+14.02)GRVPELPEKGSR	23.03	1580.87	14	0.1	396.226	26.18	103000	1	5071	D133_AF.raw	1	1	Q5T200	Methylation(R)	R2:Methylation(R):8.22
VFESWMHHWLLFEMSR	22.92	2133.99	16	2	712.339	51.46	60700	1	17490	D133_AF.raw	1	1	P04233
VQAVVAVAR	22.89	911.555	9	1	456.785	28.75	11200	1	6242	D133_AF.raw	1	1	Q01082
GR(+14.02)GYFEHR	22.88	1034.5	8	1.7	345.843	24.71	66700	1	4171	D133_AF.raw	1	1	Q9BUJ2	Methylation(R)	R2:Methylation(R):70.10
FNPGELR(+14.02)	22.83	845.439	7	0.3	423.727	31.89	115000	1	7722	D133_AF.raw	1	1	O14776	Methylation(R)	R7:Methylation(R):1000.00
TYSLGSALRPSTSR	22.81	1494.78	14	0.6	499.267	32	3000000	1	7840	D133_AF.raw	1	1	P08670
RGILTLK	22.78	799.528	7	-0.3	400.771	29.91	305000	1	6779	D133_AF.raw	1	1	P60709:P63261
TASPINSPAR(+14.02)GTPSPK	22.72	1593.85	16	0.4	532.29	25.45	49000	1	4703	D133_AF.raw	1	1	Q9BTV5	Methylation(R)	R10:Methylation(R):1000.00
NMGGPYGGGNYGPGGSGGSGGYGGR(+14.02)	22.61	2202.91	25	-0.1	735.312	33.37	5740	1	8484	D133_AF.raw	1	1	P22626	Methylation(R)	R25:Methylation(R):1000.00
STVDAPTAAGR(+14.02)	22.55	1058.54	11	1	530.276	25.51	20900	1	4755	D133_AF.raw	1	1	Q99832	Methylation(R)	R11:Methylation(R):1000.00
GAR(+14.02)PSAAGGGGGGAEPPERAGPGR(+14.02)PR	22.45	2369.21	26	0.9	593.309	40.5	30000	1	12233	D133_AF.raw	1	1	Q7Z5N4	Methylation(R)	R3:Methylation(R):0.00;R24:Methylation(R):0.00
EAEPNASVVPPPLPATWMRPPR	22.42	2411.24	22	0.4	804.755	52	171000	1	17861	D133_AF.raw	1	1	Q7RTP6
R(+18.04)GFSDSGGGPPAK	22.35	1249.63	13	-0.7	625.823	31.6	10400	1	7617	D133_AF.raw	1	1	Q9H307	Methyl:2H(3)13C(1)	R1:Methyl:2H(3)13C(1):1000.00
LLIHQSLAGGIIGVK	22.33	1517.93	15	0.5	506.984	40.06	165000	1	12135	D133_AF.raw	1	1	P61978
EAGIQARSGGDER(+18.04)KAR	22.31	1717.91	16	0.9	573.644	32.67	0	1	8140	D133_AF.raw	0	0	Q5T0F9	Methyl:2H(3)13C(1)	R13:Methyl:2H(3)13C(1):9.27
RAVAATGVRGGQVR	22.26	1396.8	14	-2.4	699.406	37.42	0	1	10558	D133_AF.raw	0	0	Q9BX68
LREFEGR(+14.02)GGPLPQEEK	22.23	1854.96	16	0.1	619.327	29.6	132000	1	6639	D133_AF.raw	1	1	Q9C0J8	Methylation(R)	R7:Methylation(R):0.00
AGSVSVTVQR	22.18	1002.55	10	1.1	502.281	25.66	59800	1	4841	D133_AF.raw	1	1	Q86XX4
GMGPGTPAGYGR(+14.02)	22.18	1133.53	12	1.3	567.772	29.27	271000	1	6430	D133_AF.raw	1	1	P23246	Methylation(R)	R12:Methylation(R):1000.00
AMGSMPLPPQGR(+14.02)	22.12	1254.62	12	1.1	628.319	35	127000	1	9263	D133_AF.raw	1	1	Q9NX05	Methylation(R)	R12:Methylation(R):1000.00
EADIDGDGQVNYEEFVQMMTAK	22.12	2489.07	22	0	1245.54	51.98	0	1	17822	D133_AF.raw	0	0	P0DP24
SIYGEKFEDENFILK	22.07	1830.9	15	1	611.309	41.68	72300	1	12908	D133_AF.raw	1	1	P62937
GNMPQR(+14.02)GGGGGGSGGIGYPYPR(+18.04)	22	2123.02	22	1.7	1062.52	51.23	0	1	17334	D133_AF.raw	0	0	Q00839	Methylation(R); Methyl:2H(3)13C(1)	R6:Methylation(R):31.53;R22:Methyl:2H(3)13C(1):31.53
NMMAAC(+57.02)DPR	21.95	1064.42	9	-0.3	533.217	27.39	34100	1	5549	D133_AF.raw	1	1	P07437:Q13885:Q9BVA1:P68371:Q13509:Q9BUF5	Carbamidomethylation	C6:Carbamidomethylation:1000.00
ASPAGTAGGPGAGAAAGGTGPLAARAGEPAER(+18.04)	21.95	2691.36	32	0.1	898.127	49.33	0	1	16395	D133_AF.raw	0	0	Q12962	Methyl:2H(3)13C(1)	R32:Methyl:2H(3)13C(1):0.00
SRFWYFVSQLK	21.83	1459.76	11	0.3	487.594	46.83	28900	1	15373	D133_AF.raw	1	1	Q02543
KPADIPNR	21.82	909.503	8	1.2	455.759	28.59	51200	1	6229	D133_AF.raw	1	1	Q96PU5
GLYDGPVC(+57.02)EVSVTPK	21.82	1619.79	15	0.4	810.901	39.5	13200	1	11739	D133_AF.raw	1	1	Q16555	Carbamidomethylation	C8:Carbamidomethylation:1000.00
AASAVGATAVETSR	21.8	1289.66	14	1.1	430.894	25.1	24500	1	4517	D133_AF.raw	1	1	A6NJG2
LKVGLQVVAVK	21.76	1152.76	11	0.8	577.388	35.15	13300	1	9371	D133_AF.raw	1	1	P10809
QEYDESGPSIVHR	21.76	1515.7	13	1.1	506.24	28.44	208000	1	5977	D133_AF.raw	1	1	P60709:P63261
DIEGM(+4.02)GVPEIK	21.74	1190.61	11	-0.1	596.313	36.26	0	1	9971	D133_AF.raw	0	0	Q15413	13C(1) 2H(3) Silac label	M5:13C(1) 2H(3) Silac label:1000.00
EIQDVTIISAC(+57.02)APPGGGR(+14.02)NPVTPRFIR	21.7	2934.55	27	-0.3	979.19	50.39	0	1	16870	D133_AF.raw	0	0	Q9C0G6	Carbamidomethylation; Methylation(R)	C11:Carbamidomethylation:1000.00;R18:Methylation(R):0.00
EKPPITVVGDVGGR(+14.02)	21.66	1436.8	14	1.2	479.941	34.54	64600	1	8990	D133_AF.raw	1	1	Q14558	Methylation(R)	R14:Methylation(R):1000.00
VM(+4.02)IPVPAGVEDGQTVRM(+4.02)PVGK	21.62	2187.19	21	0.2	730.072	52.06	0	1	17906	D133_AF.raw	0	0	Q96EY1	13C(1) 2H(3) Silac label	M2:13C(1) 2H(3) Silac label:1000.00;M17:13C(1) 2H(3) Silac label:1000.00
VTLTSEEEAR	21.57	1133.56	10	0.3	567.786	27.26	0	1	5496	D133_AF.raw	0	0	P00338
LGIEDAAGLGGPDGKSGR	21.52	1668.84	18	1.2	835.43	50.3	64600	1	16837	D133_AF.raw	1	1	Q96PR1
VIQYLAYVASSHK	21.47	1477.79	13	1.2	493.606	37.84	90700	1	10747	D133_AF.raw	1	1	P35579
NKR(+14.02)RNFGQIVSDVGR	21.41	1758.96	15	1.1	587.328	48.4	0	1	16039	D133_AF.raw	0	0	Q8NH94	Methylation(R)	R3:Methylation(R):12.28
YYWGGQYTWDMAK	21.4	1667.71	13	0.2	834.861	45.76	34900	1	14879	D133_AF.raw	1	1	P02675
VNNASLIGLGYTQTLRPGVK	21.35	2100.17	20	0.8	701.064	39.86	35300	1	11876	D133_AF.raw	1	1	Q9Y277
TAR(+14.02)GGGLSLLPPPPGGK	21.29	1587.91	17	0.9	530.311	35.72	66000	1	9744	D133_AF.raw	1	1	Q8NC96	Methylation(R)	R3:Methylation(R):1000.00
IGHPAPNFK	21.26	979.524	9	-0.2	327.515	25.26	9780	1	4618	D133_AF.raw	1	1	Q06830
C(+57.02)SPHLVLSALTSDNHGATYAFSGTHYWR	21.22	3147.46	28	0.8	630.5	43.29	52500	1	13733	D133_AF.raw	1	1	P02790	Carbamidomethylation	C1:Carbamidomethylation:1000.00
HVLHVQLNRPNK	21.22	1453.83	12	0.6	485.616	28.54	230000	1	6058	D133_AF.raw	2	2	Q13011
RTIQFVDWC(+57.02)PTGFK	21.21	1753.86	14	-0.1	585.628	43.15	26000	1	13637	D133_AF.raw	1	1	Q71U36:Q9BQE3:Q9NY65	Carbamidomethylation	C9:Carbamidomethylation:1000.00
KGEPGEPGPK	21.21	994.508	10	0.9	498.262	29.71	28700	1	6633	D133_AF.raw	1	1	P12111
ENIR(+14.02)AAVAAGC(+57.02)R(+18.04)	21.18	1318.7	12	0.9	440.576	24.66	31400	1	4144	D133_AF.raw	1	1	P28838	Methylation(R); Carbamidomethylation; Methyl:2H(3)13C(1)	R4:Methylation(R):24.17;C11:Carbamidomethylation:1000.00;R12:Methyl:2H(3)13C(1):24.17
EALVEALAAAGR(+18.04)ER	21.17	1472.82	14	2.6	737.42	49.53	0	1	16479	D133_AF.raw	0	0	A6NC98	Methyl:2H(3)13C(1)	R12:Methyl:2H(3)13C(1):14.63
TSFFQALGITTK	21.13	1312.7	12	1.5	657.36	48.72	0	1	16159	D133_AF.raw	0	0	P05388
HQAQIDQYLGLVR	20.98	1539.82	13	2	514.28	40.17	0	1	12087	D133_AF.raw	0	0	Q16799
IMNTFSVVPSPK	20.93	1318.7	12	0.5	660.355	39.92	101000	1	11936	D133_AF.raw	1	1	P07437:P68371:Q13509
GGSGGGGGGSSGGR(+14.02)GSGGGSSGGSIGGR	20.87	2092.92	28	-1	698.648	24.47	155000	1	3986	D133_AF.raw	1	1	P04264	Methylation(R)	R14:Methylation(R):26.51
LLSGYPSSSSLASAAAAAM(+4.02)AC(+57.02)HM(+4.02)HIPTSGAPGSPGTLALR	20.86	3873.94	40	-1.2	1292.32	51.54	23400	1	17541	D133_AF.raw	1	1	Q96F45	13C(1) 2H(3) Silac label; Carbamidomethylation	M19:13C(1) 2H(3) Silac label:1000.00;C21:Carbamidomethylation:1000.00;M23:13C(1) 2H(3) Silac label:1000.00
AFVHWYVGEGMEEGEFSEAR	20.79	2329.01	20	0.9	777.345	43.77	67100	1	13995	D133_AF.raw	1	1	Q71U36:P68363:Q9BQE3:Q9NY65
HEHQVMLMR	20.77	1179.56	9	0.3	394.195	28.25	18500	1	5972	D133_AF.raw	1	1	Q15233
LLAAGC(+57.02)GPGLLADAK	20.75	1425.76	15	-0.8	713.889	43.37	0	1	13801	D133_AF.raw	0	0	Q9BSU1	Carbamidomethylation	C6:Carbamidomethylation:1000.00
NLPLPPPPPPR(+14.02)GGDLMAYDR	20.75	2186.13	20	-0.4	729.717	41.07	1450000	1	12655	D133_AF.raw	1	1	P61978	Methylation(R)	R11:Methylation(R):20.18
LPAYLTIQMVR	20.73	1303.73	11	0.8	652.874	45.33	14900	1	14755	D133_AF.raw	1	1	P54578
HNLQDFINIK	20.69	1240.66	10	1	621.336	39.22	45000	1	11569	D133_AF.raw	1	1	P46821
R(+18.04)R(+18.04)ESPEGDSFVASAYASGR	20.68	2077.04	19	-0.3	1039.53	51.87	0	1	17737	D133_AF.raw	0	0	Q969F2	Methyl:2H(3)13C(1)	R1:Methyl:2H(3)13C(1):0.00;R2:Methyl:2H(3)13C(1):0.00
SVPLAATSMLITQGLISK	20.67	1829.03	18	2.5	915.526	50.99	0	1	17202	D133_AF.raw	0	0	Q9NX40
TFVSGAC(+57.02)DASSK	20.66	1228.54	12	0.4	615.277	26.65	18400	1	5272	D133_AF.raw	1	1	Q9HAV0	Carbamidomethylation	C7:Carbamidomethylation:1000.00
DQGSASPVSVSSDDSFEQSIRAEIEQFLNEK	20.64	3398.57	31	0.3	1133.87	52.01	0	1	17849	D133_AF.raw	0	0	Q5T8A7
KAAGGATPKK	20.61	927.55	10	0.4	464.783	36.97	0	1	10331	D133_AF.raw	0	0	P16403
VLQATVVAVGSGSK	20.61	1314.75	14	0.7	658.383	33.35	208000	1	8389	D133_AF.raw	1	1	P61604
KPNAGGSPAPVR(+14.02)	20.56	1163.64	12	-0.5	582.827	27.45	16900	1	5613	D133_AF.raw	1	1	Q3KQU3	Methylation(R)	R12:Methylation(R):1000.00
VRAVPTGDASK	20.54	1099.6	11	1.2	367.541	24.69	29900	1	4170	D133_AF.raw	1	1	P21333
GSDKRRGGPPGPPISR	20.54	1632.88	16	1.4	545.302	25.03	14800	1	4480	D133_AF.raw	1	1	Q04637
FWEVISDEHGIDPTGSYHGDSDLQLER(+14.02)	20.53	3115.42	27	-0.1	779.861	43.88	0	1	14045	D133_AF.raw	0	0	Q13885:Q9BVA1	Methylation(R)	R27:Methylation(R):1000.00
QALVAIFTHLR	20.52	1267.74	11	-0.3	423.587	43.56	43700	1	13873	D133_AF.raw	1	1	Q14204
LEKEGAAGSPGGPR	20.5	1324.67	14	-2.3	663.342	37.79	0	1	10761	D133_AF.raw	0	0	P53814

## Sheet: Pool2_peptide_ID
Peptide	-10lgP	Mass	Length	ppm	m/z	RT	Area D113_BE	Fraction	Scan	Source File	#Feature	#Feature D113_BE	Accession	PTM	AScore
DNNLLGKFELTGIPPAPR(+14.02)	94.01	1965.07	18	0.8	656.03	47.14	17800000	1	15437	D113_BE.raw	2	2	P11142	Methylation(R)	R18:Methylation(R):1000.00
LLSHC(+57.02)LLVTLAAHLPAEFTPAVHASLDK	91.16	3023.63	28	0.1	756.914	50.68	30300000	1	16471	D113_BE.raw	4	4	P69905	Carbamidomethylation	C5:Carbamidomethylation:1000.00
RHPYFYAPELLYYANK	91.05	2044.02	16	0.2	682.348	43.74	9710000	1	14066	D113_BE.raw	2	2
C(+57.02)PLLKPWALTFSYGR	89.57	1807.94	15	0.4	603.656	46.66	10300000	1	15044	D113_BE.raw	2	2	P04075	Carbamidomethylation	C1:Carbamidomethylation:1000.00
LLGNVLVC(+57.02)VLAHHFGK	87.61	1775.99	16	1.1	593.004	47.91	508000000	1	16200	D113_BE.raw	4	4	P68871	Carbamidomethylation	C8:Carbamidomethylation:1000.00
ALVLIAFAQYLQQC(+57.02)PFEDHVK	87.18	2489.28	21	0.2	830.767	52.02	2860000	1	17658	D113_BE.raw	2	2	P02768	Carbamidomethylation	C14:Carbamidomethylation:1000.00
SGFGGSGGGR(+14.02)GGASGPGSGSGGPGGPAGR	87.17	2272.03	29	0.4	758.352	25.27	67900	1	4397	D113_BE.raw	1	1	Q9UKZ1	Methylation(R)	R10:Methylation(R):117.77
TFHIFYYLLSGAGEHLK	87.1	1995.03	17	0.3	666.016	49.62	5440000	1	16249	D113_BE.raw	2	2	P35579
VGAHAGEYGAEALER	85.29	1528.73	15	1.2	510.584	28.94	6260000	1	6210	D113_BE.raw	2	2	P69905
HPYFYAPELLYYANK	85.27	1887.92	15	1.3	630.315	45.4	3400000	1	14689	D113_BE.raw	2	2
AGAGR(+14.02)GAPEGPGPSGGAQGGSIHSGR	84.95	2258.09	26	2	565.531	24.72	1190000	1	3957	D113_BE.raw	1	1	Q9BYN0	Methylation(R)	R5:Methylation(R):122.62
HTGPGILSMANAGPNTNGSQFFIC(+57.02)TAK	83.5	2790.32	27	0	931.115	43.62	2200000	1	13846	D113_BE.raw	1	1	P62937	Carbamidomethylation	C24:Carbamidomethylation:1000.00
LC(+57.02)YVALDFEQEMATAASSSSLEK	82.56	2549.17	23	0.8	1275.59	51.74	1400000	1	17442	D113_BE.raw	1	1	P60709:P63261	Carbamidomethylation	C2:Carbamidomethylation:1000.00
TTGIVMDSGDGVTHTVPIYEGYALPHAILR	81.87	3182.61	30	0.5	1061.88	44.75	7700000	1	14302	D113_BE.raw	2	2	P60709:P63261
IPADVDPLTITSSLSSDGVLTVNGPR	81.83	2623.37	26	0.2	875.464	51.93	219000	1	17578	D113_BE.raw	1	1	P02511
HWPFMVVNDAGRPK	81.73	1652.82	14	1.1	551.949	37.38	3250000	1	10445	D113_BE.raw	1	1	P11142
KVPQVSTPTLVEVSR	81.21	1638.93	15	0.2	547.317	34.88	3610000	1	9307	D113_BE.raw	2	2	P02768
ITIPVQTFSNLQIR	81.2	1628.92	14	0.6	815.47	46.8	9440000	1	15243	D113_BE.raw	1	1	P14136
HLVDEPQNLIK	80.98	1304.71	11	0.5	653.362	33.12	2120000	1	8396	D113_BE.raw	1	1
R(+14.02)GAYGGGYGGYDDYNGYNDGYGFGSDR	80.77	2886.15	27	0.5	963.059	38.48	3260000	1	11224	D113_BE.raw	1	1	P31943	Methylation(R)	R1:Methylation(R):175.68
IHFPLATYAPVISAEK	80.53	1755.96	16	0.2	586.326	43.54	1470000	1	13827	D113_BE.raw	1	1	Q71U36:P68363:Q9BQE3
C(+57.02)PLPRPWALTFSYGR	80.53	1819.92	15	0.8	607.648	44.75	2740000	1	14437	D113_BE.raw	1	1	P09972	Carbamidomethylation	C1:Carbamidomethylation:1000.00
VIHDNFGIVEGLMTTVHAITATQK	79.81	2594.35	24	1	649.596	51.56	1040000	1	17328	D113_BE.raw	1	1	P04406
GLVLIAFSQYLQQC(+57.02)PFDEHVK	79.79	2491.26	21	0.6	831.427	51.75	9340000	1	17458	D113_BE.raw	1	1		Carbamidomethylation	C14:Carbamidomethylation:1000.00
RHPEYAVSVLLR	79.34	1438.8	12	1.7	480.61	36.58	11900000	1	10535	D113_BE.raw	3	3
VPTANVSVVDLTC(+57.02)R	78.91	1529.79	14	0.1	765.901	39.6	561000	1	11690	D113_BE.raw	1	1	P04406	Carbamidomethylation	C13:Carbamidomethylation:1000.00
RHPYFYAPELLFFAK	78.63	1897.99	15	0.4	633.67	49.9	2810000	1	16603	D113_BE.raw	1	1	P02768
AAVPSGASTGIYEALELR	78.51	1803.94	18	0.8	902.976	45.58	95600	1	14698	D113_BE.raw	1	1	P06733
HEQNIDC(+57.02)GGGYVK	78.44	1475.65	13	0.6	738.831	25.28	108000	1	4403	D113_BE.raw	2	2	P27797	Carbamidomethylation	C7:Carbamidomethylation:1000.00
FFESFGDLSTPDAVMGNPK	78.18	2057.94	19	0.4	1029.98	48.83	3770000	1	15950	D113_BE.raw	2	2	P68871
HIADLAGNSEVILPVPAFNVINGGSHAGNK	78.14	3010.56	30	0.1	753.648	46.04	562000	1	14865	D113_BE.raw	2	2	P06733
LFTFHADIC(+57.02)TLPDTEK	78.13	1906.91	16	0.7	636.646	42.25	2860000	1	13142	D113_BE.raw	1	1		Carbamidomethylation	C9:Carbamidomethylation:1000.00
GR(+14.02)GFTPVVDDPVTER	78	1657.84	15	1.6	553.622	34.14	5130000	1	8904	D113_BE.raw	1	1	O76041	Methylation(R)	R2:Methylation(R):144.36
RHPDYSVVLLLR	77.7	1466.84	12	0.6	489.953	40.69	7300000	1	12462	D113_BE.raw	1	1	P02768
LHFFMPGFAPLTSR	77.3	1619.83	14	1.7	540.951	47.62	2970000	1	15755	D113_BE.raw	3	3	P07437:Q13885:Q9BVA1:P68371:Q9BUF5
GSRGGSGGSYGGGGSGGGYGGGSGSR	76.65	2090.88	26	-0.6	697.965	24.53	54700	1	3808	D113_BE.raw	1	1	P35527
AR(+14.02)GGC(+57.02)PGGEATLSQPPPR	75.84	1820.9	18	-0.1	607.972	25.84	235000	1	4753	D113_BE.raw	1	1	P20290	Methylation(R); Carbamidomethylation	R2:Methylation(R):195.73;C5:Carbamidomethylation:1000.00
TQGR(+14.02)GGPASVPSSSPGTSVK	75.7	1869.95	20	0.8	624.326	25.17	11700000	1	4318	D113_BE.raw	1	1	O43237	Methylation(R)	R4:Methylation(R):1000.00
TPAQYDASELK	75.64	1221.59	11	0.8	611.802	29.49	380000	1	6417	D113_BE.raw	1	1	P07355
HSQFIGYPITLFVEK	75.56	1777.94	15	0.5	889.978	47.33	663000	1	15470	D113_BE.raw	2	2	P07900
KLPPLPLTLALGAFLNHR	75.5	1970.18	18	0.4	657.735	51.84	80500	1	17533	D113_BE.raw	1	1	O96008
GALQNIIPASTGAAK	75.36	1410.78	15	0.7	706.399	37.97	2330000	1	10882	D113_BE.raw	1	1	P04406
VADALTNAVAHVDDMPNALSALSDLHAHK	75.32	2995.48	29	0.5	749.878	46.13	7930000	1	15051	D113_BE.raw	3	3	P69905
HDTSLKPISVSYNPATAK	75.01	1928	18	0.3	643.674	31.64	463000	1	7449	D113_BE.raw	1	1	P00915
IGEHTPSALAIMENANVLAR	74.79	2106.09	20	0.7	703.038	45.05	134000	1	14398	D113_BE.raw	1	1	P04075
HLQEYQDLLNVK	74.54	1498.78	12	0.7	500.6	37.47	15500000	1	10606	D113_BE.raw	2	2	P14136
GMPPPLR(+14.02)GGPGGPGGPGGPMGR	74.48	1968.98	22	0	657.333	33.31	16200000	1	8409	D113_BE.raw	1	1	Q01844	Methylation(R)	R7:Methylation(R):119.59
RPFFPFHSPSR	74.46	1373.7	11	1.1	458.908	33.93	47800000	1	9203	D113_BE.raw	1	1	P02511
HFYWYLTNEGIQYLR	74.22	2001.97	15	0.8	668.332	48	370000	1	15689	D113_BE.raw	2	2	P46783
HLYPNTPYAYTFWTYMMNAR	74.2	2539.15	20	0.4	847.389	51.78	284000	1	17494	D113_BE.raw	1	1	P27695
LADQC(+57.02)TGLQGFLVFHSFGGGTGSGFTSLLMER	74.19	3389.62	32	0.4	1130.88	52.02	391000	1	17657	D113_BE.raw	1	1	Q71U36:P68363:Q9BQE3	Carbamidomethylation	C5:Carbamidomethylation:1000.00
SYVSSGEMMVGGLAPGR	74.02	1696.79	17	0.6	849.403	41.58	859000	1	12914	D113_BE.raw	2	2	P14136
GEPAAAAAPEAGASPVEK	73.15	1621.79	18	0	811.905	28.65	20600	1	6046	D113_BE.raw	1	1	P29966
R(+14.02)GAYGGGYGGYDDYGGYNDGYGFGSDR	73.09	2829.13	27	0.4	944.052	38.93	4190000	1	11425	D113_BE.raw	1	1	P55795	Methylation(R)	R1:Methylation(R):155.06
LLSHC(+57.02)LLVTLAAHLPAEFTPAVHASLDKFLASVSTVLTSK	73.02	4257.32	40	-0.4	852.472	56.93	48800000	1	21243	D113_BE.raw	4	4	P69905	Carbamidomethylation	C5:Carbamidomethylation:1000.00
YSQFINFPIYVWSSK	72.83	1877.94	15	0.7	939.976	51.99	97400	1	17637	D113_BE.raw	1	1	P14625
HYGPGWVSMANAGK	72.83	1473.68	14	0	737.848	33.89	277000	1	8640	D113_BE.raw	1	1	P23284
SIITYVVTYYHYFSK	72.66	1882.95	15	0.2	942.483	51.81	301000	1	17504	D113_BE.raw	1	1	Q01082
MAVTFIGNSTAIQELFKR	72.59	2025.07	18	0.1	676.031	48.22	209000	1	15811	D113_BE.raw	2	2	P07437
HFVALSTNTTK	72.37	1217.64	11	0.8	609.828	26.95	649000	1	5227	D113_BE.raw	1	1	P06744
SYELPDGQVITIGNER	72.28	1789.88	16	-0.1	895.949	44.32	2310000	1	14202	D113_BE.raw	3	3	P60709:P63261:P68032:P68133
HPYFYAPELLFFAK	72.17	1741.89	14	-0.4	581.636	51.08	1090000	1	16995	D113_BE.raw	2	2	P02768
LLGNVLVC(+57.02)VLAR	71.81	1325.79	12	1.5	663.901	49.94	1400000	1	16493	D113_BE.raw	1	1	P02042	Carbamidomethylation	C8:Carbamidomethylation:1000.00
FELTGIPPAPR(+14.02)	71.67	1210.67	11	0.9	606.343	41.59	66000000	1	12798	D113_BE.raw	1	1	P11142	Methylation(R)	R11:Methylation(R):1000.00
LAQANGWGVMVSHR	71.44	1524.76	14	0.5	509.262	34.69	2180000	1	9095	D113_BE.raw	1	1	P06733
GGNFGFGDSR(+14.02)GGGGNFGPGPGSNFR	71.02	2385.06	25	0	796.028	38.07	16000000	1	10913	D113_BE.raw	2	2	P22626	Methylation(R)	R10:Methylation(R):93.87
KLADQC(+57.02)TGLQGFLVFHSFGGGTGSGFTSLLMER	70.93	3517.71	33	0.8	880.436	51.55	754000	1	17335	D113_BE.raw	1	1	Q71U36:P68363:Q9BQE3	Carbamidomethylation	C6:Carbamidomethylation:1000.00
GTFATLSELHC(+57.02)DK	70.92	1477.69	13	0.4	739.851	34.16	5010000	1	8711	D113_BE.raw	2	2	P68871	Carbamidomethylation	C11:Carbamidomethylation:1000.00
LIGDAAKNQVALNPQNTVFDAKR	70.88	2482.33	23	-0.2	828.45	36.22	0	1	9927	D113_BE.raw	0	0	P0DMV9:P0DMV8
AITIANQTNC(+57.02)PLYITK	70.84	1819.95	16	0.8	910.983	39.64	360000	1	11721	D113_BE.raw	1	1	Q16555	Carbamidomethylation	C10:Carbamidomethylation:1000.00
HWPFQVINDGDKPK	70.7	1679.84	14	0.6	560.955	35.99	3040000	1	9852	D113_BE.raw	1	1	P0DMV9:P0DMV8
HQGVMVGMGQK	70.65	1170.56	11	0.3	586.289	25.63	1680000	1	4570	D113_BE.raw	1	1	P60709:P63261:P68032:P68133
GSR(+14.02)GGSGGSYGGGGSGGGYGGGSGSR	70.55	2104.89	26	1.1	702.638	24.57	39500	1	3832	D113_BE.raw	1	1	P35527	Methylation(R)	R3:Methylation(R):95.17
VLGAFSDGLAHLDNLK	70.4	1668.88	16	1.3	557.303	43.35	8710000	1	13867	D113_BE.raw	3	3	P68871:P02042
EMEENFAVEAANYQDTIGR	70.19	2185.96	19	-0.4	1093.99	44.11	167000	1	14020	D113_BE.raw	2	2	P08670
GGSFGGR(+14.02)SSGSPYGGGYGSGGGSGGYGSR	70.19	2542.09	29	-0.6	848.369	29.35	475000	1	6265	D113_BE.raw	1	1	P51991	Methylation(R)	R7:Methylation(R):96.55
HIYYITGETK	70	1223.62	10	1.1	612.817	29.15	1910000	1	6315	D113_BE.raw	1	1	P07900
AC(+57.02)ANPAAGSVILLENLR	69.92	1767.93	17	-0.2	884.972	46.94	93900	1	15254	D113_BE.raw	1	1	P00558	Carbamidomethylation	C2:Carbamidomethylation:1000.00
HTGPNSPDTANDGFVR	69.89	1683.76	16	0.2	562.261	26.92	106000	1	5203	D113_BE.raw	1	1	P31943:P55795
TNEKVELQELNDR	69.72	1586.79	13	1.1	529.938	29.84	1160000	1	6704	D113_BE.raw	1	1	P08670
HNQLPLVIEFTEQTAPK	69.61	1964.04	17	0.9	655.687	44.19	174000	1	14088	D113_BE.raw	2	2	P07237
STTTGHLIYK	69.5	1119.59	10	0.8	560.804	25.36	526000	1	4435	D113_BE.raw	1	1	P68104:Q5VTE0
LAVNMVPFPR	69.47	1142.63	10	0.3	572.321	43.14	2450000	1	13685	D113_BE.raw	1	1	P07437:Q13885:Q9BVA1:P68371:Q13509:Q9BUF5
HSQFIGYPITLFVEKER	69.26	2063.08	17	0.2	688.702	44.34	250000	1	14177	D113_BE.raw	3	3	P07900
R(+14.02)SYVSSGEMMVGGLAPGR	68.82	1866.91	18	0.7	623.31	37.91	2990000	1	10540	D113_BE.raw	1	1	P14136	Methylation(R)	R1:Methylation(R):129.75
LPHVLLLQLGTTFFK	68.81	1726.02	15	0.6	576.347	51.79	28300	1	17498	D113_BE.raw	1	1	O43809
HALIIYDDLSK	68.74	1286.69	11	0.6	644.351	36.9	251000	1	10211	D113_BE.raw	1	1	P25705
HLIPAANTGESK	68.71	1236.65	12	0.3	619.331	25.42	147000	1	4487	D113_BE.raw	1	1	P62258
HFC(+57.02)PNVPIILVGNKK	68.68	1734.96	15	0.6	579.328	37.19	1880000	1	10519	D113_BE.raw	1	1	P61586:P08134	Carbamidomethylation	C3:Carbamidomethylation:1000.00
RSYVSSGEMMVGGLAPGR	68.5	1852.89	18	0.7	618.639	37.68	2760000	1	10492	D113_BE.raw	1	1	P14136
LLVVYPWTQR	68.29	1273.72	10	0.5	637.867	45.78	105000000	1	14759	D113_BE.raw	2	2	P68871:P02042
FELSGIPPAPR(+14.02)	68.21	1196.66	11	0.5	599.335	40.96	127000000	1	12479	D113_BE.raw	2	2	P0DMV9:P0DMV8	Methylation(R)	R11:Methylation(R):1000.00
QQVHVELDVAKPDLTAALK	68.19	2074.14	19	0.7	692.388	38.9	1940000	1	11337	D113_BE.raw	2	2	P14136
GNMPQR(+14.02)GGGGGGSGGIGYPYPR	68.13	2104.99	22	-0.2	702.669	30.64	413000	1	6958	D113_BE.raw	1	1	Q00839	Methylation(R)	R6:Methylation(R):78.13
GEAAAERPGEAAVASSPSK	67.95	1783.87	19	0.9	595.631	24.99	32300	1	4199	D113_BE.raw	1	1	P29966
RPPSAFFLFC(+57.02)SEYRPK	67.76	2000.99	16	1.1	668.006	41.53	755000	1	12769	D113_BE.raw	2	2	P09429	Carbamidomethylation	C10:Carbamidomethylation:1000.00
RGGPPGPPISR	67.73	1089.6	11	-0.3	364.209	25.09	118000	1	4223	D113_BE.raw	1	1	Q04637
HGSIIYHPSLLPR	67.62	1488.82	13	0.1	497.281	34.92	177000	1	9215	D113_BE.raw	1	1	O75891
HGSIIYHPSILPR	67.62	1488.82	13	0.1	497.281	34.92	177000	1	9215	D113_BE.raw	1	1	Q3SY69
SALSGHLETVILGLLK	67.61	1649.97	16	1.1	550.998	51.83	141000	1	17516	D113_BE.raw	1	1	P07355
HTNYTMEHIR	67.61	1300.6	10	1.4	434.541	25.19	272000	1	4348	D113_BE.raw	1	1	P12814
IISNASC(+57.02)TTNC(+57.02)LAPLAK	67.51	1832.91	17	-0.1	917.463	36.16	1600000	1	9806	D113_BE.raw	1	1	P04406	Carbamidomethylation	C7:Carbamidomethylation:1000.00;C11:Carbamidomethylation:1000.00
AVC(+57.02)MLSNTTAIAEAWAR	67.35	1863.9	17	0.6	932.956	47.58	58700	1	15518	D113_BE.raw	1	1	Q71U36:P68363:Q9NY65	Carbamidomethylation	C3:Carbamidomethylation:1000.00
VGINYQPPTVVPGGDLAK	67.28	1823.98	18	-0.3	912.996	41.71	609000	1	12804	D113_BE.raw	1	1	Q71U36:P68363:Q9BQE3:Q9NY65
YSLLPFWYTLLYQAHR	67.15	2070.07	16	0.8	691.032	52.09	0	1	17714	D113_BE.raw	0	0	Q14697
SHC(+57.02)IAEVEKDAIPENLPPLTADFAEDKDVC(+57.02)K	67.05	3510.66	31	-0.8	878.673	42.24	85500	1	13100	D113_BE.raw	1	1		Carbamidomethylation	C3:Carbamidomethylation:1000.00;C30:Carbamidomethylation:1000.00
SLYASSPGGVYATR	66.97	1427.7	14	0.6	714.86	33.62	3430000	1	8622	D113_BE.raw	1	1	P08670
QLQSLTC(+57.02)DLESLR	66.83	1561.78	13	-0.2	781.896	44.02	1070000	1	14050	D113_BE.raw	1	1	P14136	Carbamidomethylation	C7:Carbamidomethylation:1000.00
RGGIPASPIDPFQSR	66.82	1596.84	15	0.9	533.287	38.25	394000	1	10996	D113_BE.raw	1	1	Q96LD4
ISLPLPNFSSLNLR	66.56	1569.89	14	0.3	785.951	51.77	3090000	1	17327	D113_BE.raw	1	1	P08670
LSLAR(+14.02)MPPPLPTR	66.35	1461.85	13	1.4	488.291	37.6	44500000	1	10482	D113_BE.raw	2	2	P14136	Methylation(R)	R5:Methylation(R):113.97
HFSPEELK	66.34	985.487	8	0.7	493.751	27.56	15600000	1	5419	D113_BE.raw	1	1	P02511
SAVTALWGK	66.2	931.513	9	0.4	466.764	38.48	29700000	1	11326	D113_BE.raw	1	1	P68871
SGPFGQIFRPDNFVFGQSGAGNNWAK	66.19	2797.34	26	0.7	933.453	48.93	2940000	1	16206	D113_BE.raw	1	1	P07437:Q13885:Q9BVA1:P68371
HTIIISWGGVNVPK	66.11	1519.85	14	0.3	507.625	40.9	469000	1	12482	D113_BE.raw	2	2	Q14315
NSSYFVEWIPNNVK	66.06	1695.83	14	0	848.92	46.65	974000	1	15202	D113_BE.raw	1	1	P07437:Q13885:Q9BVA1:P68371:Q13509:Q9BUF5
LRLDQLTANSAR	66.06	1356.75	12	1.9	453.257	33.46	4590000	1	8505	D113_BE.raw	1	1	P14136
STNVTVAAAR(+14.02)GIK	65.95	1300.75	13	0.2	651.38	26.81	117000	1	5184	D113_BE.raw	1	1	Q5BKZ1	Methylation(R)	R10:Methylation(R):1000.00
MSATFIGNSTAIQELFKR	65.76	2013.04	18	0.6	672.019	46.72	663000	1	15245	D113_BE.raw	1	1	Q13885:Q9BVA1:P68371
YYVTIIDAPGHR	65.71	1403.72	12	0.6	468.914	35.71	1040000	1	9747	D113_BE.raw	1	1	P68104:Q5VTE0
KDLYANTVLSGGTTMYPGIADR	65.37	2342.16	22	0.8	781.727	41.62	235000	1	12853	D113_BE.raw	1	1	P60709:P63261
KVADALTNAVAHVDDMPNALSALSDLHAHK	65.32	3123.58	30	2.8	625.724	45.97	673000	1	14962	D113_BE.raw	2	2	P69905
LISQIVSSITASLR	64.65	1486.87	14	0.4	744.443	51.96	208000	1	17623	D113_BE.raw	1	1	P68363:Q9BQE3:Q9NY65
TPAQFDADELR	64.51	1261.59	11	0.8	631.805	35.13	187000	1	9359	D113_BE.raw	1	1	P04083
KVESLQEEIAFLKK	64.45	1660.94	14	1.1	554.654	38.03	496000	1	10770	D113_BE.raw	1	1	P08670
GPPR(+14.02)GGPGGELPR	64.42	1259.67	13	-0.7	420.898	25.51	597000	1	4512	D113_BE.raw	1	1	Q04637	Methylation(R)	R4:Methylation(R):92.08
IWHHTFYNELR	64.4	1514.74	11	0.7	505.922	34.3	13000000	1	9182	D113_BE.raw	1	1	P60709:P63261:P68032:P68133
FGQGGAGPVGGQGPR	64.35	1340.66	15	1.2	671.337	27.71	73200	1	5606	D113_BE.raw	1	1	P23246
SSGPYGGGGQYFAKPR	64.31	1627.77	16	1.2	543.599	29.39	894000	1	6440	D113_BE.raw	1	1	P09651
MDENQFVAVTSTNAAK	64.28	1724.8	16	-0.1	863.409	37.07	41100	1	10341	D113_BE.raw	1	1	Q16555:Q14195
KESYSVYVYK	64.2	1264.63	10	0.3	633.324	29.93	612000	1	6732	D113_BE.raw	1	1	Q99879:P62807:Q99877:Q99880:Q93079:Q5QNW6:P58876:O60814
MLITILGTVKPNANR	64.06	1639.94	15	0.8	547.656	40.82	227000	1	12510	D113_BE.raw	1	1	P17931
TITLEVEPSDTIENVK	63.99	1786.92	16	0.5	894.468	41.37	176000	1	12686	D113_BE.raw	1	1	P62987:P62979:P0CG47:P0CG48
HHC(+57.02)PNTPIILVGTK	63.97	1585.84	14	1	529.621	32.03	490000	1	7738	D113_BE.raw	1	1	P63000	Carbamidomethylation	C3:Carbamidomethylation:1000.00
APSWFDTGLSEMR	63.96	1495.68	13	0.6	748.846	46.9	824000	1	15281	D113_BE.raw	1	1	P02511
IINEPTAAAIAYGLDKR	63.94	1814.99	17	2.2	606.005	39.83	120000	1	11888	D113_BE.raw	1	1	P11021
GHYTEGAELVDSVLDVVRK	63.92	2086.07	19	-0.6	696.363	46.03	87600	1	14869	D113_BE.raw	2	2	P07437:Q13885:Q9BVA1:P68371:Q13509
HLEINPDHPIVETLR	63.86	1781.94	15	1.2	594.989	35.87	122000	1	9726	D113_BE.raw	1	1	P08238
TLTIVDTGIGMTK	63.72	1348.73	13	0.5	675.371	41.57	407000	1	12768	D113_BE.raw	2	2	P07900
TLTLVDTGIGMTK	63.72	1348.73	13	0.5	675.371	41.57	407000	1	12768	D113_BE.raw	2	2	P08238
VYAILTHGIFSGPAISR	63.68	1800.99	17	0.4	601.337	43.58	443000	1	13900	D113_BE.raw	1	1	P60891:P21108:P11908
VVAGVANALAHKYH	63.51	1448.79	14	0.1	483.937	30.2	1100000	1	6776	D113_BE.raw	1	1	P68871:P02042
VTHAVVTVPAYFNDAQR	63.45	1886.96	17	1.8	629.996	37.18	178000	1	10427	D113_BE.raw	1	1	P11021
GDVTAQIALQPALK	63.38	1423.8	14	-0.1	712.909	39.81	188000	1	11846	D113_BE.raw	1	1	P04179
MFLSFPTTK	63.36	1070.55	9	-0.1	536.281	43.42	25200000	1	13818	D113_BE.raw	1	1	P69905
HLNATVNNLQAK	63.35	1321.71	12	0.2	661.862	25.83	23000	1	4745	D113_BE.raw	1	1	Q7L099
NRPPFGQGYTQPGPGYR(+14.02)	63.23	1904.93	17	0.2	635.984	31.47	1450000	1	7481	D113_BE.raw	1	1	Q92734	Methylation(R)	R17:Methylation(R):63.78
PPYTVVYFPVR	63.23	1336.72	11	1.1	669.367	44.5	516000	1	14175	D113_BE.raw	1	1	P09211
TPSALAILENANVLAR	63.13	1651.93	16	-0.2	826.97	50.67	179000	1	16848	D113_BE.raw	1	1	P09972
SQIFSTASDNQPTVTIK	63.09	1835.93	17	-0.5	918.97	37.76	105000	1	10726	D113_BE.raw	1	1	P11021
TIIPLISQC(+57.02)TPK	63.04	1369.76	12	0.8	685.89	41.62	391000	1	12801	D113_BE.raw	1	1	P40926	Carbamidomethylation	C9:Carbamidomethylation:1000.00
TYFPHFDLSHGSAQVK	62.9	1832.88	16	0.1	611.969	36.79	222000000	1	10114	D113_BE.raw	2	2	P69905
LIGDAAKNQVALNPQNTVFDAK	62.74	2326.23	22	-0.5	776.416	38.91	999000	1	11319	D113_BE.raw	1	1	P0DMV9:P0DMV8
ALAAELNQLR	62.69	1097.62	10	1.1	549.817	37.11	2190000	1	10423	D113_BE.raw	1	1	P14136
GSPLVVISQGK	62.53	1083.63	11	-0.2	542.822	35.19	453000	1	9447	D113_BE.raw	1	1	Q16555
HGGTIPIVPTAEFQDR	62.53	1736.88	16	0.8	579.969	38.14	230000	1	10897	D113_BE.raw	1	1	P00367
VWTSGQVEEYDLDADDINSR	62.41	2311.02	20	1.5	1156.52	42.4	37200	1	13198	D113_BE.raw	1	1	P29972
HVSAYGPGLSHGMVNKPATFTIVTK	62.34	2611.36	25	1	653.847	36.38	365000	1	9969	D113_BE.raw	1	1	Q14315
HSSLAGC(+57.02)QIINYR	62.33	1517.74	13	0.4	506.921	32.14	382000	1	7751	D113_BE.raw	1	1	Q00610	Carbamidomethylation	C7:Carbamidomethylation:1000.00
HGNRGETGPSGPVGPAGAVGPR	62.31	2026.01	22	0.2	507.51	26.63	86500	1	5098	D113_BE.raw	1	1	P08123
LADVYQAELR	62.3	1176.61	10	1.7	589.315	35.64	1480000	1	9585	D113_BE.raw	1	1	P14136
VVAGVANALAHK	62.15	1148.67	12	2.2	383.897	28.59	48700000	1	5901	D113_BE.raw	1	1	P68871:P02042
ALQASALNAWR	62.15	1199.64	11	0	600.828	38.5	439000	1	11103	D113_BE.raw	1	1	P09972
VHLTPEEK	61.92	951.503	8	1.4	476.759	24.68	145000	1	3928	D113_BE.raw	1	1	P68871:P02042
SGDAAIVDMVPGKPMC(+57.02)VESFSDYPPLGR	61.87	2994.39	28	-0.3	999.138	47.62	0	1	15560	D113_BE.raw	0	0	P68104:Q5VTE0	Carbamidomethylation	C16:Carbamidomethylation:1000.00
GC(+57.02)ITIIGGGDTATC(+57.02)C(+57.02)AK	61.85	1753.78	17	0.5	877.898	35.14	181000	1	9332	D113_BE.raw	1	1	P00558	Carbamidomethylation	C2:Carbamidomethylation:1000.00;C14:Carbamidomethylation:1000.00;C15:Carbamidomethylation:1000.00
VSHVSTGGGASLELLEGK	61.76	1739.91	18	0.4	580.976	35.69	36600	1	9650	D113_BE.raw	1	1	P00558
HVVPNEVVVQR	61.7	1274.71	11	0.5	638.362	27.76	95200	1	5608	D113_BE.raw	1	1	P06396
SGR(+14.02)GGNFGFGDSR	61.68	1326.61	13	0.4	443.21	28.06	32300000	1	5954	D113_BE.raw	2	2	P22626	Methylation(R)	R3:Methylation(R):85.70
HYC(+57.02)TVANPVSR	61.64	1302.61	11	1.9	652.315	25.73	97100	1	4652	D113_BE.raw	1	1	Q14764	Carbamidomethylation	C3:Carbamidomethylation:1000.00
FDLTGIPPAPR(+14.02)	61.46	1196.66	11	0.5	599.335	40.96	127000000	1	13533	D113_BE.raw	1	1	P34931:P54652	Methylation(R)	R11:Methylation(R):1000.00
NR(+14.02)PPFGQGYTQPGPGYR	61.45	1904.93	17	0.2	635.984	31.47	1450000	1	7308	D113_BE.raw	1	1	Q92734	Methylation(R)	R2:Methylation(R):133.36
HELQANC(+57.02)YEEVKDR	61.36	1789.81	14	0.8	597.61	25.78	156000	1	4694	D113_BE.raw	1	1	P23528	Carbamidomethylation	C7:Carbamidomethylation:1000.00
VTIAQGGVLPNIQAVLLPK	61.3	1930.16	19	-0.3	966.088	51.49	947000	1	17218	D113_BE.raw	1	1	Q99878:Q96KK5:Q16777:Q9BTM1:P20671:P0C0S8:Q6FI13:Q93077:P04908:Q7L7L0
SGRGGNFGFGDSR(+14.02)GGGGNFGPGPGSNFR	61.19	2685.22	28	0.8	672.312	35.01	2210000	1	9401	D113_BE.raw	1	1	P22626	Methylation(R)	R13:Methylation(R):17.73
EAPAEGEAAEPGSPTAAEGEAASAASSTSSPK	61.17	2914.3	32	-0.5	972.438	33.94	0	1	8738	D113_BE.raw	0	0	P29966
RGGPNYQEGLR	61.16	1245.62	11	1.5	416.215	25.11	122000	1	4276	D113_BE.raw	1	1	P53396
GGGGNFGPGPGSNFR	61.16	1376.62	15	0.2	689.318	31.89	228000	1	7598	D113_BE.raw	1	1	P22626
LLGNVLVC(+57.02)VLAHHFGKEFTPPVQAAYQK	61.13	3135.67	28	0.3	784.925	50.5	0	1	16783	D113_BE.raw	0	0	P68871	Carbamidomethylation	C8:Carbamidomethylation:1000.00
RGGPPGPPISR(+14.02)	61.03	1103.62	11	0.2	368.881	25.44	80800	1	4501	D113_BE.raw	1	1	Q04637	Methylation(R)	R11:Methylation(R):85.84
AGFAGDDAPR	60.99	975.441	10	0.9	488.728	26.71	279000	1	5110	D113_BE.raw	1	1	P60709:P63261:P68032:P68133
VSAKNALESYAFNMK	60.99	1671.83	15	0.8	558.284	38.63	591000	1	11217	D113_BE.raw	1	1	P0DMV9:P0DMV8
SGSGNFGGGR(+14.02)GGGFGGNDNFGR	60.97	2043.89	22	0.3	682.304	31	15800000	1	7257	D113_BE.raw	1	1	P09651	Methylation(R)	R10:Methylation(R):70.54
THINIVVIGHVDSGK	60.88	1587.87	15	2.1	530.299	33.17	858000	1	8434	D113_BE.raw	2	2	P68104:Q5VTE0
SR(+14.02)SVSGASTGLSSSPLSSPR	60.81	1932.99	20	0.8	645.337	29.91	70900	1	6588	D113_BE.raw	1	1	Q8TDC3	Methylation(R)	R2:Methylation(R):101.66
NR(+14.02)PPFGQGYTQPGPGYR(+14.02)	60.79	1918.94	17	1.1	640.656	31.72	651000	1	7661	D113_BE.raw	1	1	Q92734	Methylation(R)	R2:Methylation(R):1000.00;R17:Methylation(R):1000.00
TVTAMDVVYALK	60.69	1309.7	12	0.2	655.855	46.31	1260000	1	15036	D113_BE.raw	1	1	P62805
TFHIFYQLLSGAGEHLK	60.69	1960.02	17	0.4	491.013	46.94	436000	1	15370	D113_BE.raw	2	2	P35580
HHAAYVNNLNVTEEK	60.67	1737.84	15	-0.7	580.288	28.09	1460000	1	5783	D113_BE.raw	1	1	P04179
VEIIANDQGNR	60.65	1227.62	11	0.5	614.818	28.62	207000	1	5999	D113_BE.raw	1	1	P0DMV9:P0DMV8:P11142:P11021:P34931:P54652
VEILANDQGNR	60.65	1227.62	11	0.5	614.818	28.62	207000	1	5999	D113_BE.raw	1	1
HQNVQLPR	60.48	990.536	8	0.6	496.276	24.97	61200	1	4213	D113_BE.raw	1	1	P26599
VNVDEVGGEALGR	60.29	1313.66	13	1.2	657.837	35.17	4720000	1	9478	D113_BE.raw	1	1	P68871
LEVERDNLAQDLATVR	60.28	1840.96	16	0.9	614.663	38.92	839000	1	11285	D113_BE.raw	1	1	P14136
SILFVPTSAPR	60.23	1186.67	11	1.3	594.344	41.38	369000	1	12671	D113_BE.raw	1	1	P14625
TTPSYVAFTDTER	60.15	1486.69	13	1.1	744.355	37.11	843000	1	10310	D113_BE.raw	1	1	P0DMV9:P0DMV8:P11142:P34931:P54652
YMAC(+57.02)C(+57.02)LLYR	60.14	1248.55	9	1.1	625.281	38.85	2790000	1	11381	D113_BE.raw	1	1	Q71U36:P68363:Q9BQE3	Carbamidomethylation	C4:Carbamidomethylation:1000.00;C5:Carbamidomethylation:1000.00
TIQFVDWC(+57.02)PTGFK	60.11	1597.76	13	0	799.887	47.88	4950000	1	15672	D113_BE.raw	1	1	Q71U36:Q9BQE3:Q9NY65	Carbamidomethylation	C8:Carbamidomethylation:1000.00
ITLPVDFVTADKFDENAK	59.93	2022.03	18	0.2	675.018	45.36	64700	1	14667	D113_BE.raw	1	1	P00558
YRIPADVDPLTITSSLSSDGVLTVNGPR	59.93	2942.53	28	0.2	981.852	50.21	0	1	16638	D113_BE.raw	0	0	P02511
HGEVC(+57.02)PAGWKPGSDTIKPDVQK	59.91	2405.18	22	1.7	602.303	30.35	319000	1	6832	D113_BE.raw	1	1	Q06830	Carbamidomethylation	C5:Carbamidomethylation:1000.00
HVLFGTVGVPEHTYR	59.88	1710.88	15	0.5	571.302	34.77	414000	1	9092	D113_BE.raw	1	1	P04216
KGDVVIVLTGWRPGSGFTNTMR	59.79	2390.25	22	0.8	598.571	43.27	2120000	1	13834	D113_BE.raw	2	2	P14618
MLVVLLQGTR	59.76	1128.67	10	0.3	565.342	43.26	340000	1	13777	D113_BE.raw	1	1	P08133
TC(+57.02)VADESAENC(+57.02)DK	59.62	1497.57	13	-0.1	749.793	24.8	62200	1	4031	D113_BE.raw	1	1	P02768	Carbamidomethylation	C2:Carbamidomethylation:1000.00;C11:Carbamidomethylation:1000.00
LIALLEVLSQK	59.6	1225.76	11	1.2	613.89	51.91	76600	1	17583	D113_BE.raw	1	1	Q14315:P21333
AMVALIDVFHQYSGR	59.39	1705.86	15	1.6	569.629	47.38	238000	1	15553	D113_BE.raw	1	1	P04271
FLASVSTVLTSK	59.27	1251.71	12	0.7	626.861	41.4	5550000	1	12871	D113_BE.raw	1	1	P69905
EFTPPVQAAYQK	59.17	1377.69	12	0.2	689.854	35.11	6270000	1	9413	D113_BE.raw	1	1	P68871
ALANSLAC(+57.02)QGK	59.14	1131.57	11	0.4	566.793	27.47	550000	1	5429	D113_BE.raw	1	1	P04075	Carbamidomethylation	C8:Carbamidomethylation:1000.00
SNVSDAVAQSTR	59.14	1233.6	12	0.1	617.805	27.01	207000	1	5234	D113_BE.raw	1	1	P60174
LALDIEIATYR	59.06	1276.7	11	-0.4	639.358	47.55	177000	1	15581	D113_BE.raw	2	2	P14136
LALDLEIATYR	59.06	1276.7	11	-0.4	639.358	47.55	177000	1	15581	D113_BE.raw	2	2	P04264
HYGGLTGLNK	59.06	1058.55	10	-0.3	530.283	26.8	783000	1	5171	D113_BE.raw	1	1	P18669
ARGGC(+57.02)PGGEATLSQPPPR	59.01	1806.88	18	0	603.301	25.66	29000	1	4690	D113_BE.raw	1	1	P20290	Carbamidomethylation	C5:Carbamidomethylation:1000.00
GFAFVQYVNER	58.99	1328.65	11	0.3	665.333	42.8	165000	1	13404	D113_BE.raw	1	1	P07910
VAVLGASGGIGQPLSLLLK	58.98	1792.08	19	-1.2	897.047	51.91	67500	1	17568	D113_BE.raw	1	1	P40926
KVLGAFSDGLAHLDNLK	58.93	1796.98	17	1.1	450.252	40.83	272000	1	12403	D113_BE.raw	1	1	P68871:P02042
AVFVDLEPTVIDEVR	58.93	1700.9	15	0.6	851.457	48.73	223000	1	15978	D113_BE.raw	1	1	Q71U36:P68363:Q9BQE3
EAASYQEALAR	58.88	1207.58	11	1.5	604.8	30.54	1170000	1	6934	D113_BE.raw	1	1	P14136
FGQGGAGPVGGQGPR(+14.02)	58.81	1354.67	15	-1.5	678.343	28.15	348000	1	5801	D113_BE.raw	1	1	P23246	Methylation(R)	R15:Methylation(R):1000.00
GR(+14.02)GAANDSTQFTVAGR	58.74	1620.8	16	-0.6	541.273	26.9	400000	1	5229	D113_BE.raw	1	1	O95425	Methylation(R)	R2:Methylation(R):125.77
RPC(+57.02)FSALTPDETYVPK	58.72	1879.91	16	1	627.646	37.53	834000	1	10541	D113_BE.raw	1	1		Carbamidomethylation	C3:Carbamidomethylation:1000.00
GGSDGYGSGR(+14.02)GFGDGYNGYGGGPGGGNFGGSPGYGGGR	58.7	3401.41	38	-0.2	1134.81	37.14	3760000	1	10469	D113_BE.raw	2	2	P22626	Methylation(R)	R10:Methylation(R):110.07
ILFIFIDSDHTDNQR	58.57	1832.91	15	1.2	611.977	46.05	581000	1	14853	D113_BE.raw	1	1	P07237
SAAQAAAQTNSNAAGKQLR	58.42	1856.95	19	0.6	619.989	24.83	27600	1	4068	D113_BE.raw	1	1	Q8NC51
LGEYGFQNALIVR	58.19	1478.79	13	0.5	740.402	44.44	267000	1	14137	D113_BE.raw	1	1
IAVQPGTVGPQGR	58.18	1278.7	13	1.6	640.361	29.62	39900	1	6503	D113_BE.raw	1	1	P08572
GGNFGGR(+14.02)GGYGGGGGGSR	58.08	1539.69	18	1.1	514.239	24.72	167000	1	3960	D113_BE.raw	1	1	P51991	Methylation(R)	R7:Methylation(R):81.20
MPPPLPTR	58.03	907.495	8	0.4	454.755	31.42	2880000	1	7328	D113_BE.raw	1	1	P14136
TDDYLDQPC(+57.02)LETVNR	57.97	1837.82	15	1	919.916	39.76	53100	1	11821	D113_BE.raw	1	1	P31150	Carbamidomethylation	C9:Carbamidomethylation:1000.00
TQYEAMASSNMHEAEEWYR	57.91	2331.95	19	-0.5	778.324	39.08	3060000	1	11442	D113_BE.raw	1	1	P14136
TIITYPWFQNSSVILFLNKK	57.87	2411.33	20	-0.4	804.782	51.78	206000	1	17495	D113_BE.raw	1	1	P29992:P50148
LTPFMLGALVAMYEHK	57.78	1819.94	16	1.3	607.654	51.98	85700	1	17633	D113_BE.raw	1	1	P06744
AMGIMNSFVNDIFER	57.76	1742.81	15	-0.9	872.413	52.03	0	1	17659	D113_BE.raw	0	0	Q99879:P62807:Q99877:Q99880:Q93079:Q5QNW6:P58876:O60814:Q16778:P23527:P33778:Q8N257:P06899
LQTSSVLVSGLR	57.68	1258.72	12	0.6	630.37	38.1	68800	1	10909	D113_BE.raw	1	1	P22314
KQTALVELLK	57.51	1141.71	10	0.4	571.861	36.06	489000	1	9883	D113_BE.raw	1	1
RKPDTIEVQQMK	57.5	1471.78	12	0.3	491.601	25.69	75400	1	4640	D113_BE.raw	1	1	P15311
EITALAPSTMK	57.4	1160.61	11	0.7	581.313	34.71	825000	1	9074	D113_BE.raw	1	1	P60709:P63261:P68032:P68133
SLHTLFGDELC(+57.02)K	57.38	1418.69	12	0.2	473.903	38.25	217000	1	11022	D113_BE.raw	2	2		Carbamidomethylation	C11:Carbamidomethylation:1000.00
TVMENFVAFVDK	57.33	1398.69	12	0.2	700.35	48.68	762000	1	16008	D113_BE.raw	1	1
DVNAAIATIK	57.25	1014.57	10	0.8	508.293	36.55	363000	1	10054	D113_BE.raw	1	1	Q71U36:P68363:Q9BQE3
MSSYAFFVQTC(+57.02)R	57.17	1495.66	12	1.3	748.838	42.59	147000	1	13272	D113_BE.raw	1	1	P09429	Carbamidomethylation	C11:Carbamidomethylation:1000.00
TVTNAVVTVPAYFNDSQR	57.17	1980.99	18	1.1	661.338	42.58	151000	1	13281	D113_BE.raw	2	2	P11142
EEAENTLQSFR	57.07	1322.61	11	1.2	662.313	33.92	272000	1	8710	D113_BE.raw	1	1	P08670
TFVNITPAEVGVLVGK	57.05	1642.93	16	-1.4	822.471	48.76	150000	1	15979	D113_BE.raw	1	1	P07737
TAVNALWGK	57.02	958.524	9	-0.1	480.269	35.93	1640000	1	9875	D113_BE.raw	1	1	P02042
LKPGAPLRPK	56.96	1075.69	10	1.7	359.57	24.72	112000	1	3963	D113_BE.raw	1	1	P21333
HFVGMLPEKDC(+57.02)R	56.87	1487.7	12	0.5	496.908	29.36	182000	1	6385	D113_BE.raw	1	1	P60981	Carbamidomethylation	C11:Carbamidomethylation:1000.00
LRGGSPLNTGK	56.77	1098.61	11	1.2	550.315	24.7	280000	1	3958	D113_BE.raw	2	2	P12111
NGLSLAALKK	56.72	1013.62	10	0.6	507.819	31.21	218000	1	7338	D113_BE.raw	1	1	P16401
DNIQGITKPAIR	56.7	1324.75	12	0.7	442.59	30.4	2050000	1	6798	D113_BE.raw	1	1	P62805
QGGR(+14.02)GAGATLEHQQEISK	56.48	1879.95	18	1.4	627.658	24.83	107000	1	4063	D113_BE.raw	1	1	Q9Y5S2	Methylation(R)	R4:Methylation(R):1000.00
EIVHIQAGQC(+57.02)GNQIGAK	56.43	1821.92	17	0.7	608.313	30.05	626000	1	6649	D113_BE.raw	1	1	P07437:Q13885:Q9BVA1:Q13509	Carbamidomethylation	C10:Carbamidomethylation:1000.00
EIVHLQAGQC(+57.02)GNQIGAK	56.43	1821.92	17	0.7	608.313	30.05	626000	1	6649	D113_BE.raw	1	1	P68371	Carbamidomethylation	C10:Carbamidomethylation:1000.00
QDVDNASLAR	56.41	1087.53	10	1.4	544.771	26.14	118000	1	4887	D113_BE.raw	1	1	P08670
FADLTDAAAR	56.36	1049.51	10	0	525.764	33.71	864000	1	8565	D113_BE.raw	1	1	P14136
VNFAMNVGK	56.27	978.496	9	0.8	490.255	34.41	242000	1	9040	D113_BE.raw	1	1	P14618
HAQAQYAYPGAR	56.25	1331.64	12	0.8	666.826	25.32	28300	1	4407	D113_BE.raw	1	1	Q14112
SGNFGGSR(+14.02)NMGGPYGGGNYGPGGSGGSGGYGGR	56.18	2965.25	33	1	989.427	32.2	110000	1	7828	D113_BE.raw	1	1	P22626	Methylation(R)	R8:Methylation(R):51.69
TVTAMDVVYALKR	55.99	1465.8	13	-1	733.905	42.01	216000	1	13160	D113_BE.raw	1	1	P62805
IAVAAQNC(+57.02)YK	55.93	1136.56	10	0.1	569.29	26.95	401000	1	5205	D113_BE.raw	1	1	P60174	Carbamidomethylation	C8:Carbamidomethylation:1000.00
LIGQIVSSITASLR	55.93	1456.86	14	0.4	729.438	51.78	1510000	1	17369	D113_BE.raw	1	1	Q71U36
VIISAPSADAPMFVMGVNHEK	55.92	2212.1	21	0.5	738.375	43.06	410000	1	13484	D113_BE.raw	1	1	P04406
TFAPEEISAMVLTK	55.83	1535.79	14	-0.7	768.902	47.73	337000	1	15528	D113_BE.raw	1	1	P11021
SGVSLAALKK	55.81	972.597	10	-0.2	487.305	28.32	1080000	1	5998	D113_BE.raw	1	1	P16403:P10412:P16402
TYLGNALVC(+57.02)TC(+57.02)YGGSR	55.8	1790.81	16	-0.9	896.41	39.7	67200	1	11808	D113_BE.raw	1	1	P02751	Carbamidomethylation	C9:Carbamidomethylation:1000.00;C11:Carbamidomethylation:1000.00
TC(+57.02)LLIVFSK	55.79	1079.6	9	0.3	540.81	45.37	900000	1	14633	D113_BE.raw	1	1	P61586:P08134:P62745	Carbamidomethylation	C2:Carbamidomethylation:1000.00
LDHKFDLMYAK	55.76	1379.69	11	0.8	460.904	33.54	357000	1	8513	D113_BE.raw	1	1	Q71U36:P68363:Q9BQE3:Q9NY65
LTTPTYGDLNHLVSATMSGVTTC(+57.02)LR	55.62	2707.33	25	-0.2	903.451	51.18	807000	1	17108	D113_BE.raw	2	2	P07437:Q13885:Q9BVA1:P68371	Carbamidomethylation	C23:Carbamidomethylation:1000.00
ILIRPMYSNPPLNGAR	55.61	1810.99	16	-0.1	604.67	36.93	283000	1	10230	D113_BE.raw	1	1	P00505
TKPYIQVDIGGGQTK	55.53	1603.86	15	1.1	535.627	32.51	481000	1	7883	D113_BE.raw	1	1	P11021
GAPLVVIC(+57.02)QGK	55.47	1140.63	11	0.4	571.324	35.1	288000	1	9336	D113_BE.raw	1	1	Q14195	Carbamidomethylation	C8:Carbamidomethylation:1000.00
AHSSMVGVNLPQK	55.45	1366.7	13	0	456.575	29.33	385000	1	6292	D113_BE.raw	1	1	P00558
LGDLYEEEMR	55.45	1253.56	10	-0.3	627.787	36.9	462000	1	10197	D113_BE.raw	1	1	P08670
QVQSLTC(+57.02)EVDALKGTNESLER	55.4	2376.16	21	0.3	793.061	38.77	395000	1	11230	D113_BE.raw	1	1	P08670	Carbamidomethylation	C7:Carbamidomethylation:1000.00
IIYGGSVTGATC(+57.02)K	55.18	1325.66	13	0.7	663.84	30.96	688000	1	7249	D113_BE.raw	1	1	P60174	Carbamidomethylation	C12:Carbamidomethylation:1000.00
VLSPADKTNVK	55.12	1170.66	11	1.3	391.228	24.75	3580000	1	3971	D113_BE.raw	1	1	P69905
AGAGSATLSMAYAGAR	55.08	1453.7	16	0.3	727.857	35.1	100000	1	9384	D113_BE.raw	1	1	P40926
SPYTVTVGQAC(+57.02)NPSAC(+57.02)R	55.07	1866.84	17	0.1	934.425	32.88	22400	1	8198	D113_BE.raw	1	1	P21333	Carbamidomethylation	C11:Carbamidomethylation:1000.00;C16:Carbamidomethylation:1000.00
RSYVSSGEMMVGGLAPGRR	55.06	2008.99	19	1.6	670.673	34.63	493000	1	9059	D113_BE.raw	1	1	P14136
TPFLLSGTSYK	54.99	1212.64	11	0.2	607.327	40.16	59300	1	12094	D113_BE.raw	1	1	P55084
DSYVGDEAQSK	54.97	1197.51	11	0.7	599.765	25.89	37000	1	4790	D113_BE.raw	1	1	P60709:P63261:P68032:P68133
YHTINGHNAEVR	54.83	1409.68	12	1	470.901	24.62	48500	1	3875	D113_BE.raw	1	1	P22626
IITLAGPTNAIFK	54.78	1357.8	13	-0.3	679.905	44.86	76600	1	14346	D113_BE.raw	1	1	Q15366
LEEEGQSLKDEMAR	54.73	1633.76	14	0.5	817.889	29.65	1230000	1	6574	D113_BE.raw	2	2	P14136
HC(+57.02)LPEGAPHR	54.64	1172.55	10	1	391.858	24.57	73200	1	3839	D113_BE.raw	1	1	Q14112	Carbamidomethylation	C2:Carbamidomethylation:1000.00
LGVRPSQGGEAPR	54.62	1322.71	13	0.8	441.909	24.83	49500	1	4075	D113_BE.raw	1	1	P02751
ATIAGGGVIPHIHK	54.47	1369.78	14	0.9	457.602	30.2	481000	1	6766	D113_BE.raw	1	1	Q71UI9:P0C0S5
QEYDESGPSIVHR	54.43	1515.7	13	-0.1	506.239	28.23	984000	1	5791	D113_BE.raw	1	1	P60709:P63261
LDQLTANSAR	54.29	1087.56	10	0.3	544.788	26.81	297000	1	5161	D113_BE.raw	1	1	P14136
WSRPQAPITGYR	54.23	1430.74	12	1.2	477.922	31.46	521000	1	7374	D113_BE.raw	1	1	P02751
VSAGR(+14.02)GSISSGLEFVSHNPPSEAATPPVAR	54.23	2990.52	30	-0.1	748.638	37.03	527000	1	10293	D113_BE.raw	1	1	Q99700	Methylation(R)	R5:Methylation(R):84.39
YISPDQLADLYK	54.17	1424.72	12	0.4	713.367	44.86	208000	1	14350	D113_BE.raw	1	1	P06733
GYSFTTTAER	54.01	1131.52	10	-0.2	566.767	31.01	3030000	1	7184	D113_BE.raw	1	1	P60709:P63261
GR(+14.02)GVDLTEPTQPTR	53.98	1539.8	14	1.3	514.275	27.96	315000	1	5761	D113_BE.raw	1	1	P20339	Methylation(R)	R2:Methylation(R):68.46
HVTNSPFK	53.94	928.477	8	1.4	465.246	24.7	54800	1	3962	D113_BE.raw	1	1	Q14315
HFC(+57.02)PNVPIILVANKK	53.9	1748.98	15	0.5	584	37.47	180000	1	10564	D113_BE.raw	1	1	P62745	Carbamidomethylation	C3:Carbamidomethylation:1000.00
HQPTAIIAK	53.9	977.566	9	0.3	489.79	24.82	83300	1	4047	D113_BE.raw	1	1	P29401
RPPGVLHC(+57.02)TTK	53.84	1264.67	11	0.5	422.565	24.58	207000	1	3869	D113_BE.raw	1	1	P09543	Carbamidomethylation	C8:Carbamidomethylation:1000.00
SIQFVDWC(+57.02)PTGFK	53.79	1583.74	13	0.1	792.88	47.65	238000	1	15525	D113_BE.raw	1	1	P68363	Carbamidomethylation	C8:Carbamidomethylation:1000.00
VIGSGC(+57.02)NLDSAR	53.78	1247.59	12	1.3	624.804	27.99	96800	1	5763	D113_BE.raw	1	1	P00338:P07195	Carbamidomethylation	C6:Carbamidomethylation:1000.00
GR(+14.02)GAAPPPPPVPR	53.75	1281.73	13	0.9	641.873	26.3	60900	1	4940	D113_BE.raw	1	1	Q07666	Methylation(R)	R2:Methylation(R):96.48
GTFATLSELHC(+57.02)DKLHVDPENFR	53.68	2585.23	22	1.2	647.316	39.67	6960000	1	11918	D113_BE.raw	1	1	P68871	Carbamidomethylation	C11:Carbamidomethylation:1000.00
C(+57.02)C(+57.02)TESLVNR	53.6	1137.49	9	0.4	569.753	26.54	300000	1	5040	D113_BE.raw	1	1	P02768	Carbamidomethylation	C1:Carbamidomethylation:1000.00;C2:Carbamidomethylation:1000.00
ALESPERPFLAILGGAK	53.59	1767.99	17	1.2	590.337	45.35	0	1	14620	D113_BE.raw	0	0	P00558
DGQVINETSQHHDDLE	53.58	1835.79	16	-0.3	612.938	28.65	432000	1	6014	D113_BE.raw	1	1	P08670
YGGPQHIVGSPFK	53.58	1385.71	13	0.8	462.911	32.41	183000	1	7846	D113_BE.raw	1	1	Q14315
QYKPVVYSNTIQSLAAIVR	53.48	2149.19	19	-2.7	717.402	45.37	75800	1	14641	D113_BE.raw	1	1	P09471
TGTITTFEHAHNMR	53.3	1614.76	14	0.3	539.26	27.71	87800	1	5603	D113_BE.raw	1	1	P13639
C(+57.02)GLVIGR(+14.02)GGENVK	53.26	1371.73	13	-0.8	686.871	28.04	6090000	1	5702	D113_BE.raw	2	2	Q92945	Carbamidomethylation; Methylation(R)	C1:Carbamidomethylation:1000.00;R7:Methylation(R):1000.00
LIVALMKPSR	53.16	1126.69	10	0.3	564.352	34.5	590000	1	9069	D113_BE.raw	2	2	P08758
TC(+57.02)LLISYTTNK	53.15	1312.67	11	0.8	657.343	38.33	381000	1	11026	D113_BE.raw	1	1	P60953	Carbamidomethylation	C2:Carbamidomethylation:1000.00
QAPPPPPPSRGGPPPPPPPPHNSGPPPPPAR	53.12	3040.58	31	-0.1	761.152	28.44	115000	1	5950	D113_BE.raw	1	1	O00401
HSHAGELEALGGVKPAVLTR	52.68	2041.11	20	-0.3	511.284	36.14	88200	1	9844	D113_BE.raw	1	1	P02730
SNYNFEKPFLWLAR	52.46	1783.9	14	1.6	595.643	46.92	210000	1	15230	D113_BE.raw	1	1	P62826
IGGIGTVPVGR	52.42	1024.6	11	1.4	513.309	34.29	891000	1	8891	D113_BE.raw	1	1	P68104:Q5VTE0
NAGAVIGKGGKNIK	52.35	1325.78	14	1	442.934	24.55	21000	1	3797	D113_BE.raw	1	1	P61978
LLIHQSLAGGIIGVK	52.31	1517.93	15	0.9	506.984	39.75	203000	1	11859	D113_BE.raw	1	1	P61978
LEAENNLAAYR	52.29	1262.63	11	0.7	632.32	32.61	749000	1	7954	D113_BE.raw	1	1	P14136
LRVDPVNFK	52.27	1086.62	9	0.4	544.317	32.72	5860000	1	8215	D113_BE.raw	2	2	P69905
ALIAAQYSGAQVR	52.14	1346.73	13	0	674.373	34.16	92100	1	8834	D113_BE.raw	1	1	P26641
SIRPGLSPYR	51.98	1144.64	10	0.7	382.553	28.25	306000	1	5825	D113_BE.raw	1	1	Q14697
AFVHWYVGEGMEEGEFSEAR	51.94	2329.01	20	-0.4	777.344	43.5	46300	1	13849	D113_BE.raw	1	1	Q71U36:P68363:Q9BQE3:Q9NY65
YRGQHVPGSPFQFTVGPLGEGGAHK	51.84	2622.31	25	0.6	656.585	39.06	55600	1	11454	D113_BE.raw	1	1	Q14315
QITVNDLPVGR	51.64	1210.67	11	0.9	606.341	37.51	129000	1	10576	D113_BE.raw	1	1	Q06830:P32119
KLAVNMVPFPR	51.56	1270.72	11	0.2	636.368	38.48	321000	1	11084	D113_BE.raw	1	1	P07437:Q13885:Q9BVA1:P68371:Q13509:Q9BUF5
SR(+14.02)SISGASSGLSTSPLSSPR	51.55	1947	20	1.7	650.009	31.3	128000	1	7312	D113_BE.raw	1	1	Q8IWQ3	Methylation(R)	R2:Methylation(R):98.85
TFVNITPAEVGVLVGKDR	51.5	1914.06	18	1.3	639.027	45.16	73200	1	14448	D113_BE.raw	1	1	P07737
TAR(+14.02)GGGLSLLPPPPGGK	51.49	1587.91	17	1	530.311	35.53	103000	1	9564	D113_BE.raw	1	1	Q8NC96	Methylation(R)	R3:Methylation(R):1000.00
C(+57.02)C(+57.02)AADDKEAC(+57.02)FAVEGPK	51.42	1926.79	17	0.6	643.271	30.35	347000	1	6795	D113_BE.raw	1	1		Carbamidomethylation	C1:Carbamidomethylation:1000.00;C2:Carbamidomethylation:1000.00;C10:Carbamidomethylation:1000.00
LQSRPAAPPAPGPGQLTLR	51.38	1926.08	19	0.5	643.034	33.71	90700	1	8560	D113_BE.raw	1	1	Q99536
TIAPALVSK	51.3	898.549	9	1.5	450.282	31.28	1250000	1	7302	D113_BE.raw	1	1	P06733
SAPPTR(+14.02)GPPPSYGGSSR	51.23	1683.83	17	0.7	562.285	24.95	249000	1	4159	D113_BE.raw	1	1	P38159	Methylation(R)	R6:Methylation(R):55.61
LKEC(+57.02)C(+57.02)DKPLLEK	51.12	1531.77	12	0.2	511.599	25.4	126000	1	4474	D113_BE.raw	1	1		Carbamidomethylation	C4:Carbamidomethylation:1000.00;C5:Carbamidomethylation:1000.00
SSQSSSQQFSGIGR(+14.02)	51.11	1468.69	14	0.1	735.353	29.45	240000	1	6372	D113_BE.raw	1	1	Q92841	Methylation(R)	R14:Methylation(R):1000.00
LFYADHPFIFLVR	50.97	1636.88	13	0.8	546.633	49.54	179000	1	16335	D113_BE.raw	1	1	P50454
LHVDPENFR	50.94	1125.56	9	0.7	376.193	31.15	1090000	1	7379	D113_BE.raw	1	1	P68871:P02042
HQLYIDETVNSNIPTNLR	50.91	2126.08	18	1.2	709.7	38.9	129000	1	11338	D113_BE.raw	1	1	P02675
RAVLSPGSVFSPGR(+14.02)GASFLFPPAESLSPEEPR	50.9	3354.74	32	-0.3	839.691	47.27	0	1	15430	D113_BE.raw	0	0	P27987	Methylation(R)	R14:Methylation(R):4.25
SR(+14.02)GFAGLHPIPPQGGK	50.88	1631.89	16	0.2	544.971	30.12	580000	1	6736	D113_BE.raw	2	2	Q9NX05	Methylation(R)	R2:Methylation(R):1000.00
YGFIEGHVVIPR	50.84	1385.75	12	1.9	462.923	38.54	446000	1	11277	D113_BE.raw	1	1	P16070
SSGPTSLFAVTVAPPGAR	50.83	1713.9	18	0.4	857.96	44.8	22300	1	14358	D113_BE.raw	1	1	Q00839
RGGPPFAFVEFEDPRDAEDAVYGR	50.8	2696.26	24	1.2	675.073	45.28	1100000	1	14500	D113_BE.raw	2	2	Q07955
KIESLEEEIR	50.78	1244.66	10	0.7	623.338	31.64	339000	1	7588	D113_BE.raw	1	1	P14136
LSGSHSQGVAYPVR	50.76	1456.74	14	0.5	486.588	25.95	43900	1	4822	D113_BE.raw	1	1	P98160
VANVSLLALYK	50.74	1189.71	11	0.5	595.861	43.71	26800	1	13912	D113_BE.raw	1	1	P62266
HRPELIDYGK	50.73	1226.64	10	0.2	409.888	28.06	116000	1	5810	D113_BE.raw	1	1	P12814
VFSGLVSTGLK	50.56	1106.63	11	0	554.324	39.03	178000	1	11370	D113_BE.raw	1	1	P13639
MGMGNNYSGGYGTPDGLGGYGR(+14.02)	50.55	2193.92	22	1.4	1097.97	39.96	108000	1	11954	D113_BE.raw	1	1	P31942	Methylation(R)	R22:Methylation(R):1000.00
LQKPNAAIR	50.42	1009.6	9	1.3	337.542	24.75	37500	1	3998	D113_BE.raw	1	1	Q8IZP2:P50502
GRGGPPGQFHDNANGGQNGTVQEIMIPAGK	50.42	3003.44	30	0.7	751.867	34.04	429000	1	8756	D113_BE.raw	1	1	Q92945
TPALVNAAVTYSKPR	50.34	1586.88	15	0.1	529.967	34.71	248000	1	9143	D113_BE.raw	1	1	O75964
QEADEATLAR	50.33	1102.53	10	0.4	552.27	25.91	178000	1	4788	D113_BE.raw	1	1	P14136
STVDAPTAAGR(+14.02)	50.31	1058.54	11	0.6	530.275	25.43	28600	1	4513	D113_BE.raw	1	1	Q99832	Methylation(R)	R11:Methylation(R):1000.00
TIAQDYGVLK	50.3	1106.6	10	1.3	554.307	35.67	486000	1	9537	D113_BE.raw	1	1	Q06830
SIYYITGESK	50.25	1159.58	10	0.3	580.795	34.5	185000	1	9023	D113_BE.raw	1	1	P08238
LISWYDNEFGYSNR	50.19	1762.8	14	0.1	882.405	45.81	560000	1	14778	D113_BE.raw	1	1	P04406
GATVTR(+14.02)GVPPPPTVR	50.13	1517.87	15	0.7	506.964	28.74	436000	1	6016	D113_BE.raw	1	1	Q07666	Methylation(R)	R6:Methylation(R):66.45
AGLQFPVGR	50.1	943.524	9	0.7	472.77	37.55	4060000	1	10517	D113_BE.raw	1	1	Q99878:Q96KK5:Q16777:Q9BTM1:P20671:P0C0S8:Q6FI13:Q93077:P04908:Q7L7L0:Q71UI9:P0C0S5:Q8IUE6
QIGENLIVPGGVK	50	1322.76	13	0.3	662.385	39.34	54500	1	11576	D113_BE.raw	1	1	Q16555
DATNVGDEGGFAPNILENK	49.95	1959.92	19	0.9	980.967	44.12	33800	1	14044	D113_BE.raw	1	1	P06733
NQVALNPQNTVFDAK	49.83	1657.84	15	0.3	829.929	37.89	175000	1	10752	D113_BE.raw	1	1	P0DMV9:P0DMV8
TGLIDYNQLALTAR	49.76	1547.83	14	0.1	774.923	44.61	87700	1	14232	D113_BE.raw	1	1	P34897
EHALLAYTLGVK	49.61	1313.73	12	1.3	657.875	38.96	159000	1	11346	D113_BE.raw	1	1	P68104:Q5VTE0
VNQPASFAVQLNGAR	49.61	1570.82	15	-0.1	786.418	37.76	91500	1	10637	D113_BE.raw	1	1	Q14315
GDLGIEIPAEK	49.6	1140.6	11	1.9	571.31	39.08	80100	1	11461	D113_BE.raw	1	1	P14618
TTQFSC(+57.02)TLGEK	49.52	1270.59	11	0.6	636.301	30.62	559000	1	6937	D113_BE.raw	1	1	Q01469	Carbamidomethylation	C6:Carbamidomethylation:1000.00
HYQINQQWER	49.47	1400.66	10	-0.2	701.336	29.48	248000	1	6344	D113_BE.raw	1	1	P02751
SKDYEFMWNPHLGYILTC(+57.02)PSNLGTGLR	49.31	3168.52	27	-1.2	793.135	48.46	434000	1	15878	D113_BE.raw	1	1	P12277	Carbamidomethylation	C18:Carbamidomethylation:1000.00
GR(+14.02)GSFGMQVVSVGGPGK	49.28	1632.84	17	0.1	545.288	34.3	29500	1	8925	D113_BE.raw	1	1	Q9NX05	Methylation(R)	R2:Methylation(R):1000.00
SGR(+14.02)GGNFGFGDSR(+14.02)GGGGNFGPGPGSNFR	49.24	2699.23	28	0.5	675.816	35.17	2170000	1	9316	D113_BE.raw	1	1	P22626	Methylation(R)	R3:Methylation(R):43.77;R13:Methylation(R):36.33
VHAIPLR	49.23	804.497	7	0.2	403.256	26.06	78300	1	4873	D113_BE.raw	1	1	P62879
KATGPPVSELITK	49.15	1339.77	13	1.8	447.598	31.44	135000	1	7425	D113_BE.raw	1	1	P16401
GVVDSEDLPLNISR	49.05	1512.78	14	0.4	757.397	42.31	82900	1	13172	D113_BE.raw	1	1	P07900:P08238
GVVDSEDIPLNLSR	49.05	1512.78	14	0.4	757.397	42.31	82900	1	13172	D113_BE.raw	1	1
GGNFGGR(+14.02)SSGPYGGGGQYFAKPR	48.96	2287.09	23	1	572.78	30.19	416000	1	6739	D113_BE.raw	2	2	P09651	Methylation(R)	R7:Methylation(R):85.10
RGGPISFSSSR	48.95	1149.59	11	0	575.802	26.86	273000	1	5168	D113_BE.raw	1	1	P35580
FELSGIPPAPR(+14.02)GVPQIEVTFDIDANGILNVTATDK	48.92	3707.94	35	2.1	1236.99	52.04	0	1	17670	D113_BE.raw	0	0	P0DMV9:P0DMV8	Methylation(R)	R11:Methylation(R):1000.00
GVVPLAGTNGETTTQGLDGLSER	48.87	2271.13	23	1.3	1136.58	41.38	20100	1	12722	D113_BE.raw	1	1	P04075
GPMTGSSGGDR(+14.02)GGFK	48.85	1423.65	15	0	475.558	25.04	209000	1	4225	D113_BE.raw	1	1	Q92804	Methylation(R)	R11:Methylation(R):1000.00
PMFIVNTNVPR	48.74	1286.68	11	1.5	644.348	40.39	1230000	1	12245	D113_BE.raw	1	1	P14174
GR(+14.02)GGGSGNFMGR	48.7	1165.54	12	-0.6	389.521	24.82	69100	1	4061	D113_BE.raw	1	1	P51991	Methylation(R)	R2:Methylation(R):82.30
IQTQPGYANTLR	48.67	1360.71	12	-0.6	681.362	30.46	48100	1	6898	D113_BE.raw	1	1	Q00325
QSGLYFIKPLK	48.64	1292.75	11	0.9	647.383	37.83	94900	1	10771	D113_BE.raw	1	1	P02679
FVTVQTISGTGALR	48.6	1448.8	14	1.7	725.408	39.43	0	1	11663	D113_BE.raw	0	0	P00505
LALDIEIATYRK	48.59	1404.8	12	0.4	469.273	40.34	664000	1	12133	D113_BE.raw	1	1	P14136
FIIPNVVK	48.53	928.575	8	1.2	465.295	41.48	394000	1	12734	D113_BE.raw	1	1	P00338
VNPC(+57.02)IGGVILFHETLYQK	48.48	2087.09	18	-0.3	696.703	44.25	84700	1	14099	D113_BE.raw	2	2	P04075	Carbamidomethylation	C4:Carbamidomethylation:1000.00
TLSDNVNLPQGVR	48.33	1411.74	13	-0.3	706.878	35.7	62800	1	9640	D113_BE.raw	1	1	O15075
ILYHGYSLLYVQGNER	48.32	1923.98	16	2.8	642.337	39.67	190000	1	11845	D113_BE.raw	1	1	P02462
ILLAELEQLKGQGK	48.09	1538.9	14	1.4	513.976	40.26	467000	1	12216	D113_BE.raw	1	1	P08670
ALSDHHVYLEGTLLKPNMVTPGHAC(+57.02)PIK	48.08	3097.58	28	1	620.525	38.45	135000	1	11137	D113_BE.raw	1	1	P09972	Carbamidomethylation	C25:Carbamidomethylation:1000.00
TAHYGSLPQK	48.08	1100.56	10	0.8	367.861	24.77	68700	1	4005	D113_BE.raw	1	1	P02686
APDFVFYAPR	48.06	1181.59	10	0.9	591.801	43.65	78200	1	13823	D113_BE.raw	1	1	P15311
AGNNMLLVGVHGPR	48.05	1433.76	14	1.4	478.927	34.18	206000	1	8759	D113_BE.raw	1	1	P21333
TAVC(+57.02)DIPPR	47.97	1027.51	9	-0.4	514.763	28.13	2410000	1	6178	D113_BE.raw	1	1	P07437:Q13885:Q9BVA1:P68371	Carbamidomethylation	C4:Carbamidomethylation:1000.00
SYVSSGEMMVGGLAPGRR	47.95	1852.89	18	0.7	618.639	37.68	2760000	1	10691	D113_BE.raw	1	1	P14136
SGRGGNFGFGDSRGGGGNFGPGPGSNFR	47.94	2671.2	28	0.5	668.808	34.92	947000	1	9169	D113_BE.raw	1	1	P22626
TFEGVDPQTTSMR	47.92	1467.67	13	0.8	734.841	34.16	43600	1	8842	D113_BE.raw	1	1	P31150
MREIVHIQAGQC(+57.02)GNQIGAK	47.9	2109.06	19	1.5	528.272	30.56	272000	1	6800	D113_BE.raw	1	1	P07437:Q13885:Q9BVA1:Q13509	Carbamidomethylation	C12:Carbamidomethylation:1000.00
MREIVHLQAGQC(+57.02)GNQIGAK	47.9	2109.06	19	1.5	528.272	30.56	272000	1	6800	D113_BE.raw	1	1	P68371	Carbamidomethylation	C12:Carbamidomethylation:1000.00
GPPSR(+14.02)GGHMDDGGYSMNFNMSSSR	47.88	2557.05	24	0.7	640.271	33.04	759000	1	8263	D113_BE.raw	2	2	P38159	Methylation(R)	R5:Methylation(R):79.67
LSSPATLNSR	47.84	1044.56	10	0.7	523.286	27.57	161000	1	5536	D113_BE.raw	1	1
NQVALNPQNTVFDAKR	47.81	1813.94	16	0.8	605.656	33.92	370000	1	8638	D113_BE.raw	1	1	P0DMV9:P0DMV8
ADLINNLGTIAK	47.78	1241.7	12	1	621.857	41.09	90100	1	12562	D113_BE.raw	1	1	P07900:P08238
THILLFLPK	47.77	1080.67	9	2.5	541.343	41.2	149000	1	12539	D113_BE.raw	1	1	P07237
GLSATVTGGQK	47.68	1017.55	11	-0.1	509.78	25.91	143000	1	4789	D113_BE.raw	1	1	P60201
AATPYTVSIYGVIQGYR	47.68	1857.96	17	-0.5	929.988	47.64	19200	1	15573	D113_BE.raw	1	1	P24821
LDIDSPPITAR	47.64	1196.64	11	1.6	599.328	37.64	61800	1	10688	D113_BE.raw	1	1	P14618
HGIPMSHVAR	47.6	1103.57	10	1.2	368.863	25.02	37900	1	4226	D113_BE.raw	1	1	P24666
FKDLGEEHFK	47.59	1248.61	10	1.4	417.212	27.65	214000	1	5566	D113_BE.raw	1	1
HFNAPSHIR	47.4	1077.55	9	0	360.19	24.82	79200	1	4046	D113_BE.raw	1	1	P61254
FNAHGDANTIVC(+57.02)NSK	47.36	1646.75	15	-0.8	549.923	26.8	77200	1	5179	D113_BE.raw	1	1	P09382	Carbamidomethylation	C12:Carbamidomethylation:1000.00
IMNTFSVMPSPK	47.28	1350.67	12	0.3	676.341	40.34	547000	1	12112	D113_BE.raw	1	1	Q13885:Q9BVA1:Q9BUF5
HLEINPDHSIIETLR	47.24	1785.94	15	1.4	596.321	38.17	203000	1	11006	D113_BE.raw	1	1	P07900
TTGKPIEASIR	47.16	1171.66	11	0.9	391.56	25.12	66700	1	4306	D113_BE.raw	1	1	P08133
YLTVAAIFR	46.97	1052.6	9	-1.2	527.308	46.29	3060000	1	15037	D113_BE.raw	1	1	Q13885:Q9BVA1
EQQHVMEELFQSSFR	46.87	1893.87	15	0.7	632.297	43.54	277000	1	13925	D113_BE.raw	1	1	P78527
IVAPPGGR(+14.02)ANITSLG	46.86	1435.81	15	0.4	718.915	36.54	1850000	1	10154	D113_BE.raw	1	1	Q16555	Methylation(R)	R8:Methylation(R):1000.00
VLTEIIASR	46.7	1000.59	9	1.4	501.304	36.09	62400	1	9829	D113_BE.raw	1	1	P08758
HVVFIAQR	46.7	968.556	8	1.6	485.286	27.99	799000	1	5755	D113_BE.raw	1	1	P62081
ILISLATGHR	46.43	1079.65	10	0.2	540.83	33.64	42800	1	8654	D113_BE.raw	1	1	P08133
HQAQIDQYLGLVR	46.42	1539.82	13	1.6	514.28	39.89	155000	1	11947	D113_BE.raw	1	1	Q16799
FITIFGTR	46.39	953.533	8	1.3	477.775	44.18	159000	1	14067	D113_BE.raw	1	1	P08758
SGAFGHLFRPDNFIFGQSGAGNNWAK	46.33	2794.34	26	0.4	699.592	46.56	443000	1	15296	D113_BE.raw	2	2	Q13509
DAGTIAGLNVMR	46.32	1216.62	12	2.3	609.32	41.65	0	1	12846	D113_BE.raw	0	0	P11021
RPC(+57.02)FSALEVDETYVPK	46.08	1909.92	16	-1	637.648	39.6	97200	1	11719	D113_BE.raw	1	1	P02768	Carbamidomethylation	C3:Carbamidomethylation:1000.00
AYHEQLSVAEITNAC(+57.02)FEPANQMVK	46.05	2749.28	24	-0.3	917.435	42.51	143000	1	13213	D113_BE.raw	1	1	Q71U36:P68363	Carbamidomethylation	C15:Carbamidomethylation:1000.00
IMNTFSVVPSPK	46.04	1318.7	12	1.3	660.356	39.83	1010000	1	11998	D113_BE.raw	1	1	P07437:P68371:Q13509
AGEAPTENPAPPTQQSSAE	46	1880.84	19	0	941.427	30.38	73100	1	6870	D113_BE.raw	1	1	P16989
HVFGESDELIGQK	45.94	1457.71	13	0.7	486.913	33.41	142000	1	8486	D113_BE.raw	1	1	P60174
IGAEVYHNLK	45.88	1142.61	10	1	381.877	27.87	361000	1	5680	D113_BE.raw	2	2	P06733
RVPFSLLR	45.85	986.602	8	1.2	494.309	37.12	788000	1	10476	D113_BE.raw	1	1	P04792
TSASIGSLC(+57.02)ADAR	45.84	1307.61	13	0.3	654.814	32.03	561000	1	7686	D113_BE.raw	1	1	P60201	Carbamidomethylation	C9:Carbamidomethylation:1000.00
LLYNNVSNFGR	45.84	1295.66	11	2.1	648.84	37.99	190000	1	10808	D113_BE.raw	1	1	Q00610
GC(+57.02)DVVVIPAGVPR	45.71	1337.71	13	0.9	669.864	39.99	26800	1	11980	D113_BE.raw	1	1	P40926	Carbamidomethylation	C2:Carbamidomethylation:1000.00
DLYANTVLSGGTTMYPGIADR	45.68	2214.06	21	-0.9	1108.04	48.47	636000	1	15866	D113_BE.raw	2	2	P60709:P63261
APIIAVTR	45.67	839.523	8	0.7	420.769	31.55	315000	1	7491	D113_BE.raw	1	1	P14618
VHVIFNYK	45.65	1018.56	8	0.8	510.288	31.92	149000	1	7699	D113_BE.raw	1	1	P27797
QDEHGFISR	45.64	1087.5	9	0.1	544.76	25.59	38100	1	4591	D113_BE.raw	1	1	P02511
MYGVLPWNAFPGK	45.63	1478.74	13	1.1	740.377	49.17	627000	1	16099	D113_BE.raw	1	1	P60201
TFVVQGFGNVGLHSMR	45.59	1747.88	16	0.5	583.635	40.83	183000	1	12515	D113_BE.raw	1	1	P00367
VETGVLKPGMVVTFAPVNVTTEVK	45.58	2514.38	24	1.1	839.134	44.97	280000	1	14395	D113_BE.raw	1	1	P68104:Q5VTE0
SYTITGLQPGTDYK	45.45	1542.76	14	0.7	772.386	37.79	60100	1	10759	D113_BE.raw	1	1	P02751
SSGSPYGGGYGSGGGSGGYGSR	45.36	1909.78	22	0.4	955.899	28.78	0	1	6087	D113_BE.raw	0	0	P51991
IGHPAPNFK	45.19	979.524	9	-0.7	327.515	25.09	116000	1	4282	D113_BE.raw	1	1	Q06830
TIGGGDDSFNTFFSETGAGK	45.18	2006.89	20	0	1004.45	46.34	1120000	1	15125	D113_BE.raw	1	1	Q71U36:P68363:Q9BQE3
LIQFHFHWGSLDGQGSEHTVDK	45.14	2537.21	22	1.3	635.31	40.68	2070000	1	12632	D113_BE.raw	2	2	P00918
MSSTFIGNSTAIQELFKR	45.13	2029.03	18	0.6	677.351	45.18	32100	1	14511	D113_BE.raw	1	1	Q13509
QVQSLTC(+57.02)EVDALK	45.08	1489.74	13	-0.8	745.879	38.42	122000	1	11086	D113_BE.raw	1	1	P08670	Carbamidomethylation	C7:Carbamidomethylation:1000.00
GNPTVEVDLFTSK	45.07	1405.71	13	1.7	703.863	41.93	139000	1	12940	D113_BE.raw	1	1	P06733
GIYAYGFEKPSAIQQR	45.05	1826.93	16	0.4	609.985	35.84	205000	1	9692	D113_BE.raw	1	1	P60842
LSILYPATTGR	44.98	1190.67	11	1.3	596.341	39.42	166000	1	11616	D113_BE.raw	1	1	P30041
LIINSLYK	44.91	962.58	8	0.8	482.298	38.66	261000	1	11216	D113_BE.raw	1	1	P14625
GGGGGR(+14.02)GGLHDFR	44.86	1255.62	13	1.2	419.547	24.78	125000	1	4017	D113_BE.raw	1	1	P23246	Methylation(R)	R6:Methylation(R):56.15
LIIWDSYTTNK	44.85	1352.7	11	0.8	677.357	42.7	113000	1	13391	D113_BE.raw	1	1	P62879
SC(+57.02)NC(+57.02)LLLK	44.75	1006.49	8	1	504.255	32.23	1100000	1	7831	D113_BE.raw	1	1	P06733	Carbamidomethylation	C2:Carbamidomethylation:1000.00;C4:Carbamidomethylation:1000.00
ETYGEMADC(+57.02)C(+57.02)AK	44.71	1433.53	12	-0.1	717.77	28.83	44900	1	6094	D113_BE.raw	1	1	P02768	Carbamidomethylation	C9:Carbamidomethylation:1000.00;C10:Carbamidomethylation:1000.00
WKPPMIDNPSYQGIWKPR	44.67	2212.12	18	1.9	738.384	41	185000	1	12472	D113_BE.raw	3	3	P27824
SVTEQGAELSNEER	44.65	1547.71	14	-0.5	774.86	27.93	79800	1	5743	D113_BE.raw	1	1	P63104
SGPKPFSAPKPQTSPSPK	44.55	1836.97	18	0.6	460.251	25.67	61700	1	4633	D113_BE.raw	1	1	Q01518
TGAIVDVPVGEELLGR	44.51	1623.88	16	0	812.949	46.82	44200	1	15235	D113_BE.raw	1	1	P25705
VFNLYPR	44.4	907.492	7	1.5	454.754	37.79	567000	1	10831	D113_BE.raw	1	1	Q16555
C(+57.02)C(+57.02)SGAIIVLTK	44.36	1220.63	11	-0.3	611.32	36.46	209000	1	10012	D113_BE.raw	1	1	P14618	Carbamidomethylation	C1:Carbamidomethylation:1000.00;C2:Carbamidomethylation:1000.00
VPQLPITNFNR	44.35	1297.71	11	1.1	649.865	41.26	108000	1	12611	D113_BE.raw	1	1	Q14315
HHAAYVNNLNVTEEKYQEALAK	44.33	2541.26	22	-0.3	636.322	36.02	41200	1	9828	D113_BE.raw	1	1	P04179
WQALLVQIR	44.32	1125.67	9	0.4	563.841	44.59	34200	1	14268	D113_BE.raw	1	1	Q14204
VAHSDKPGSTSTASFR	44.32	1646.8	16	1.1	549.942	24.62	12200	1	3880	D113_BE.raw	1	1	Q9P0L0
VC(+57.02)GSNLLSIC(+57.02)K	44.29	1249.62	11	1	625.816	36.77	328000	1	10196	D113_BE.raw	1	1	P60201	Carbamidomethylation	C2:Carbamidomethylation:1000.00;C10:Carbamidomethylation:1000.00
LNC(+57.02)QVIGASVDSHFC(+57.02)HLAWVNTPK	44.25	2752.32	24	-0.6	689.087	41.5	0	1	12772	D113_BE.raw	0	0	Q06830	Carbamidomethylation	C3:Carbamidomethylation:1000.00;C15:Carbamidomethylation:1000.00
EVMFPPGTR(+14.02)	44.16	1046.52	9	0	524.268	35.41	490000	1	9290	D113_BE.raw	1	1	Q96DH6	Methylation(R)	R9:Methylation(R):1000.00
THTC(+57.02)PPC(+57.02)PAPELLGGPSVFLFPPKPK	44.1	2843.45	26	1.1	711.871	44.86	116000	1	14495	D113_BE.raw	2	2	P01857:P0DOX5	Carbamidomethylation	C4:Carbamidomethylation:1000.00;C7:Carbamidomethylation:1000.00
YREWHHFLVVNMK	44.02	1757.88	13	0.8	440.478	39.34	3060000	1	11741	D113_BE.raw	1	1	P30086
TIAMDGTEGLVR	43.91	1261.63	12	0.4	631.824	36.86	142000	1	10221	D113_BE.raw	1	1	P06576
ELGVGIALR	43.9	926.555	9	0.9	464.285	39.62	247000	1	11836	D113_BE.raw	1	1	Q01469
GGFQNR(+14.02)GGGSGGGGNYR	43.89	1610.73	17	0.5	537.918	24.63	26000	1	3887	D113_BE.raw	1	1	Q9BUJ2	Methylation(R)	R6:Methylation(R):53.43
GGPGSAVSPYPTFNPSSDVAALHK	43.86	2355.15	24	0.7	786.058	39.73	96600	1	11861	D113_BE.raw	1	1	P04083
YLTVATVFR	43.77	1068.6	9	0.3	535.306	42.42	451000	1	13177	D113_BE.raw	1	1	Q13509:Q9BUF5
FYALSASFEPFSNK	43.63	1606.77	14	0.4	804.391	47.41	254000	1	15405	D113_BE.raw	1	1	P27797
FANYIDKVR	43.63	1124.6	9	0.2	375.873	30.8	558000	1	7125	D113_BE.raw	1	1	P08670
VEFPRSGR(+14.02)GTGRGGGGGGGGGAPR	43.62	2169.09	24	1.4	434.826	24.95	387000	1	4119	D113_BE.raw	1	1	Q07955	Methylation(R)	R8:Methylation(R):0.00
DNFTAIPEGTNGVEER	43.58	1747.8	16	-0.6	874.907	38.02	0	1	10878	D113_BE.raw	0	0	Q14195
LFDQAFGLPR	43.38	1162.61	10	0.6	582.314	45.09	117000	1	14438	D113_BE.raw	1	1	P04792
NFILDQTNVSAAAQR	43.27	1646.84	15	-0.1	824.426	39.6	0	1	11769	D113_BE.raw	0	0	Q00839
C(+57.02)DSSPDSAEDVR	43.07	1336.52	12	1.4	669.268	25.12	9750	1	4312	D113_BE.raw	1	1	P02765	Carbamidomethylation	C1:Carbamidomethylation:1000.00
GGGGNFGPGPGSNFR(+14.02)GGSDGYGSGR	43.06	2284	25	0.9	762.341	31.76	3970000	1	7536	D113_BE.raw	2	2	P22626	Methylation(R)	R15:Methylation(R):21.00
LLC(+57.02)GLLAER	42.89	1043.58	9	0.7	522.798	40.77	156000	1	12377	D113_BE.raw	1	1	P14174	Carbamidomethylation	C3:Carbamidomethylation:1000.00
FADLSEAANR	42.87	1092.52	10	1.5	547.268	31.66	393000	1	7471	D113_BE.raw	1	1	P08670
SAADLISQAR	42.84	1030.54	10	0.2	516.278	33.07	82400	1	8324	D113_BE.raw	1	1	Q14195
RVHPVSTMIK	42.75	1166.66	10	0.2	389.894	26.71	289000	1	5128	D113_BE.raw	1	1	P00338
LFQFHFHWGSTNEHGSEHTVDGVK	42.72	2795.28	24	1	699.829	39.94	10400000	1	12664	D113_BE.raw	2	2	P00915
LGGSAVISLEGKPL	42.7	1339.77	14	0.6	670.893	42.1	37300	1	13072	D113_BE.raw	1	1	P23528
AVFPSIVGRPR	42.62	1197.7	11	0	400.24	34.6	8670000	1	8951	D113_BE.raw	1	1	P60709:P63261:P68032:P68133
TFDEIASGFR	42.61	1141.54	10	0.3	571.778	40.45	181000	1	12202	D113_BE.raw	1	1	P11166
TNQELQEINR	42.57	1243.62	10	0.3	622.815	27.95	239000	1	5663	D113_BE.raw	1	1	P07355
SSFYVNGLTLGGQK	42.55	1469.75	14	-0.4	735.883	41.45	328000	1	12688	D113_BE.raw	1	1	P07737
GIRPAINVGLSVSR	42.53	1437.84	14	0.5	480.288	36.21	114000	1	9943	D113_BE.raw	2	2	P25705
AEMMELNDR	42.52	1107.47	9	1	554.742	31.98	433000	1	7813	D113_BE.raw	1	1	P14136
EYEATLEEC(+57.02)C(+57.02)AK	42.45	1501.61	12	0.1	751.811	30.64	206000	1	6982	D113_BE.raw	1	1		Carbamidomethylation	C9:Carbamidomethylation:1000.00;C10:Carbamidomethylation:1000.00
IHVC(+57.02)LYFITPTGHSLK	42.41	1884.99	16	1.7	629.339	41.17	251000	1	12616	D113_BE.raw	2	2	Q92599	Carbamidomethylation	C4:Carbamidomethylation:1000.00
FQNALLVR	42.25	959.555	8	0.4	480.785	35.62	866000	1	9499	D113_BE.raw	1	1	P02768
QLFHPEQLITGK	42.13	1409.77	12	1.4	470.93	38.69	368000	1	11276	D113_BE.raw	1	1	Q71U36:P68363:Q9BQE3:Q9NY65
QIFHPEQLITGK	42.13	1409.77	12	1.4	470.93	38.69	368000	1	11276	D113_BE.raw	1	1
TYSLGSALRPSTSR	42.11	1494.78	14	1.1	499.267	31.66	11600000	1	7577	D113_BE.raw	1	1	P08670
KPFPDFVYK	42.02	1139.6	9	-0.2	570.808	36.77	176000	1	10084	D113_BE.raw	1	1	Q16555
TLAQLNPESSLFIIASK	41.93	1831.01	17	-0.5	916.511	49.96	37200	1	16543	D113_BE.raw	1	1	P06744
GAC(+57.02)LLPK	41.89	757.416	7	0.9	379.715	29.13	277000	1	6197	D113_BE.raw	1	1		Carbamidomethylation	C3:Carbamidomethylation:1000.00
VLDSGAPIKIPVGPETLGR	41.83	1918.09	19	-0.7	640.37	41.69	0	1	12875	D113_BE.raw	0	0	P06576
MC(+57.02)LFAGFQR	41.83	1128.52	9	0	565.268	43.77	0	1	13911	D113_BE.raw	0	0	Q00839	Carbamidomethylation	C2:Carbamidomethylation:1000.00
FGQGGAGPVGGQGPR(+14.02)GMGPGTPAGYGR	41.81	2456.18	27	1.1	819.734	32.81	104000	1	8119	D113_BE.raw	1	1	P23246	Methylation(R)	R15:Methylation(R):29.09
VLYLSAFTSK	41.79	1127.62	10	0.3	564.819	42.84	278000	1	13327	D113_BE.raw	1	1	P04216
NRPAIAR(+14.02)GAAGGGGR	41.72	1393.77	15	1.1	465.596	24.49	185000	1	3755	D113_BE.raw	1	1	Q86V81	Methylation(R)	R7:Methylation(R):9.68
HQAQIDHYLGLANK	41.71	1606.82	14	1	536.615	32.49	567000	1	8140	D113_BE.raw	1	1	Q9NQC3
IIAPPER	41.68	794.465	7	-0.2	398.24	27.11	223000	1	5329	D113_BE.raw	1	1	P60709:P63261:P68032:P68133
FIVLSNNYLQIR	41.65	1478.82	12	0.1	740.42	46.33	118000	1	15019	D113_BE.raw	1	1	P13591
AVVYSNTIQSIMAIVK	41.63	1735.95	16	-1.1	868.984	51.86	0	1	17538	D113_BE.raw	0	0	P04899
TDYNASVSVPDSSGPER	41.62	1779.79	17	-0.8	890.902	32.92	54500	1	8218	D113_BE.raw	1	1	P61978
HPDYSVVLLLR	41.62	1310.73	11	1.8	656.376	42.86	142000	1	13648	D113_BE.raw	1	1	P02768
DC(+57.02)GATWVVLGHSER	41.62	1585.73	14	0.1	529.584	37.81	151000	1	10697	D113_BE.raw	1	1	P60174	Carbamidomethylation	C2:Carbamidomethylation:1000.00
GGSGGGGGGSSGGR(+14.02)GSGGGSSGGSIGGR	41.61	2092.92	28	0.3	698.649	24.47	0	1	3733	D113_BE.raw	0	0	P04264	Methylation(R)	R14:Methylation(R):20.30
TFEINPR	41.53	875.45	7	1.1	438.733	31.4	259000	1	7318	D113_BE.raw	1	1	P14625
TSTADYAMFK	41.5	1133.51	10	0.2	567.761	35.42	147000	1	9480	D113_BE.raw	1	1	P02679
GTLSGWILSK	41.44	1060.59	10	-0.6	531.303	43.02	357000	1	13642	D113_BE.raw	1	1	P27824
TQTVC(+57.02)NFTDGALVQHQEWDGKESTITR	41.43	3120.46	27	0.7	781.122	37.52	113000	1	10486	D113_BE.raw	1	1	Q01469	Carbamidomethylation	C5:Carbamidomethylation:1000.00
VFLENVIR	41.42	988.571	8	0.3	495.293	41.05	666000	1	12463	D113_BE.raw	1	1	P62805
QKLQDETNLR	41.35	1243.65	10	0.4	415.558	25.11	138000	1	4305	D113_BE.raw	1	1	P14136
RSPPIPLAK	41.26	977.602	9	0.6	489.809	27.37	126000	1	5444	D113_BE.raw	1	1	P13667
ALSDHHIYLEGTLLKPNMVTPGHAC(+57.02)TQK	41.18	3130.57	28	-0.4	627.121	37.48	393000	1	10520	D113_BE.raw	1	1	P04075	Carbamidomethylation	C25:Carbamidomethylation:1000.00
SSYYVVSGNDPAAEEPSR	41.07	1926.86	18	1.4	964.438	34.45	0	1	9008	D113_BE.raw	0	0	P46821
AIMTYVSSFYHAFSGAQK	40.94	2006.96	18	0.1	669.993	48.16	156000	1	15779	D113_BE.raw	1	1	P12814
SYVTTSTR	40.81	913.451	8	0.4	457.733	24.82	44100	1	4060	D113_BE.raw	1	1	P08670
RTIQFVDWC(+57.02)PTGFK	40.78	1753.86	14	1.2	585.628	42.68	185000	1	13324	D113_BE.raw	1	1	Q71U36:Q9BQE3:Q9NY65	Carbamidomethylation	C9:Carbamidomethylation:1000.00
LVNELTEFAK	40.77	1162.62	10	0.5	582.319	39.7	444000	1	11745	D113_BE.raw	1	1
TKPSDEEMLFIYGHYK	40.66	1956.93	16	1.2	653.318	38.7	637000	1	11420	D113_BE.raw	1	1	P07108
TPEVTC(+57.02)VVVDVSHEDPEVK	40.65	2138.02	19	0.6	713.681	38.83	57700	1	11302	D113_BE.raw	1	1	P01857:P0DOX5	Carbamidomethylation	C6:Carbamidomethylation:1000.00
TVTATFGYPFR	40.62	1258.63	11	-0.4	630.324	42.29	230000	1	13148	D113_BE.raw	1	1	Q16563
TLMAQSIYGGR	40.62	1195.6	11	2.4	598.81	35.57	89800	1	9588	D113_BE.raw	1	1	Q14204
TVDNFVALATGEK	40.47	1363.7	13	1.8	682.858	42.81	114000	1	13450	D113_BE.raw	1	1	P23284
GIGR(+14.02)GTVQALHATGAR	40.43	1577.88	16	-0.5	395.476	27.87	197000	1	5672	D113_BE.raw	1	1	Q7Z4W1	Methylation(R)	R4:Methylation(R):37.25
SFVLNLGK	40.41	876.507	8	0.8	439.261	39.89	539000	1	11987	D113_BE.raw	1	1	P09382
THNSSLEYNIFEGMEC(+57.02)R	40.38	2085.89	17	1.8	696.305	42.16	193000	1	13002	D113_BE.raw	1	1	Q16555	Carbamidomethylation	C16:Carbamidomethylation:1000.00
VVNVSSIMSVR	40.33	1189.65	11	1.5	595.833	40.22	343000	1	12033	D113_BE.raw	1	1	P16152
RAPVPVR(+14.02)GGPK	40.31	1146.7	11	0.6	383.24	24.53	472000	1	3779	D113_BE.raw	1	1	Q12906	Methylation(R)	R7:Methylation(R):97.87
QATKDAGVIAGLNVLR	40.24	1624.93	16	0.7	542.65	38.96	93600	1	11365	D113_BE.raw	1	1	P0DMV9:P0DMV8:P34931
VDPVNFK	40.22	817.433	7	1.2	409.724	30.8	1310000	1	7138	D113_BE.raw	1	1	P69905
DSNNLC(+57.02)LHFNPR	40.18	1485.68	12	1.1	496.234	34.96	259000	1	9222	D113_BE.raw	1	1	P09382	Carbamidomethylation	C6:Carbamidomethylation:1000.00
GFGR(+14.02)GGAESHTFK	40.12	1363.66	13	0.3	455.562	25.01	269000	1	4211	D113_BE.raw	1	1	P50238	Methylation(R)	R4:Methylation(R):1000.00
YASIC(+57.02)QQNGIVPIVEPEILPDGDHDLKR	40.1	3175.6	28	0.2	794.907	43.51	146000	1	13854	D113_BE.raw	1	1	P04075:P09972	Carbamidomethylation	C5:Carbamidomethylation:1000.00
R(+14.02)PFFPFHSPSR	40.1	1387.71	11	0.1	463.579	34.11	191000	1	8779	D113_BE.raw	1	1	P02511	Methylation(R)	R1:Methylation(R):62.68
SPFSVAVSPSLDLSK	40.07	1532.81	15	-0.4	767.411	44.61	37900	1	14309	D113_BE.raw	1	1	P21333
MGMGNNYSGGYGTPDGLGGYGR(+14.02)GGGGSGGYYGQGGMSGGGWR	39.83	3979.65	42	0.3	995.92	40.91	3620000	1	12638	D113_BE.raw	2	2	P31942	Methylation(R)	R22:Methylation(R):47.73
LQDETNLR	39.83	987.499	8	1.4	494.757	25.81	202000	1	4722	D113_BE.raw	1	1	P14136
FNGGGHINHSIFWTNLSPNGGGEPK	39.78	2636.25	25	0.6	660.071	38.62	855000	1	11181	D113_BE.raw	2	2	P04179
SGRGGNFGFGDSRGGGGNFGPGPGSNFRGGSDGYGSGR	39.76	3564.57	38	1	713.921	34.04	18400000	1	8855	D113_BE.raw	1	1	P22626
HPSFPTTQQLNVDR	39.73	1638.81	14	2.2	547.279	32.62	38000	1	8063	D113_BE.raw	1	1	Q14112
SQREPGPGAKEEAAGVSGPAGR(+14.02)GR	39.71	2334.18	24	1	467.844	24.8	92300	1	4025	D113_BE.raw	1	1	Q15654	Methylation(R)	R22:Methylation(R):7.32
IIKPC(+57.02)NHVLSLSFPIR	39.64	1893.07	16	-0.1	632.029	40.53	140000	1	12192	D113_BE.raw	1	1	P00367	Carbamidomethylation	C5:Carbamidomethylation:1000.00
AMGSMPLPPQGR(+14.02)	39.57	1254.62	12	1.2	628.319	34.86	268000	1	9200	D113_BE.raw	1	1	Q9NX05	Methylation(R)	R12:Methylation(R):1000.00
DTHKSEIAHR	39.52	1192.59	10	-0.2	398.539	24.14	14800	1	3611	D113_BE.raw	1	1
VDFSLAGALNAGFK	39.47	1408.73	14	-0.4	705.375	49.85	0	1	16478	D113_BE.raw	0	0	P14136
VIQYLAYVASSHK	39.47	1477.79	13	0.7	493.605	37.72	275000	1	10731	D113_BE.raw	1	1	P35579
NLPLPPPPPPR(+14.02)GGDLMAYDR	39.45	2186.13	20	0.1	729.717	40.96	1960000	1	12588	D113_BE.raw	1	1	P61978	Methylation(R)	R11:Methylation(R):16.96
GMGPGTPAGYGR(+14.02)GREEYEGPNKKPR	39.42	2674.3	25	0.2	535.868	26.84	3210000	1	5133	D113_BE.raw	1	1	P23246	Methylation(R)	R12:Methylation(R):18.53
FAC(+57.02)HSASLTVR	39.25	1247.61	11	0.2	416.877	26.8	127000	1	5195	D113_BE.raw	1	1	Q15233	Carbamidomethylation	C3:Carbamidomethylation:1000.00
HWGGNVLGPK	39.25	1063.56	10	0.4	532.786	29.42	393000	1	6348	D113_BE.raw	1	1	P62424
AVTEQGAELSNEER	39.24	1531.71	14	1.5	766.864	27.43	14500	1	5479	D113_BE.raw	1	1	P27348
LKNLYFLYLIELR	39.22	1696.99	13	1	566.672	51.77	39300	1	17485	D113_BE.raw	1	1	Q86YB8:Q96HE7
ISVYYNEASSHK	39.2	1396.66	12	1.4	466.562	27.31	141000	1	5376	D113_BE.raw	1	1	Q13509
TGSETPQAPMSGVGPVSGGPGGFGR(+14.02)GSQGGNFEGPNKR	39.14	3628.71	38	0.2	908.184	34.88	6220000	1	9170	D113_BE.raw	1	1	Q8WXF1	Methylation(R)	R25:Methylation(R):17.22
MAVTFIGNSTAIQELFK	39.11	1868.97	17	0.1	935.493	51.94	84100	1	17603	D113_BE.raw	1	1	P07437
LGDVYVNDAFGTAHR	39.03	1633.78	15	2.5	545.604	36.8	52300	1	10199	D113_BE.raw	1	1	P00558
TFSVWYVPEVTGTHK	39.02	1749.87	15	1.3	584.299	43.05	227000	1	13515	D113_BE.raw	1	1	P21333
VNPTVFFDIAVDGEPLGRVSFELFADKVPKTAENFR	39	4024.07	36	0.7	805.822	51.95	1390000	1	17600	D113_BE.raw	1	1	P62937
TVPFC(+57.02)STFAAFFTR	38.97	1650.79	14	0.4	826.401	51.99	152000	1	17642	D113_BE.raw	1	1	P29401	Carbamidomethylation	C5:Carbamidomethylation:1000.00
GFGDGYNGYGGGPGGGNFGGSPGYGGGR(+14.02)	38.97	2508.05	28	-0.9	837.023	39.84	154000	1	11952	D113_BE.raw	1	1	P22626	Methylation(R)	R28:Methylation(R):1000.00
TPAFAESVTEGDVR	38.95	1477.7	14	0.6	739.86	36.03	0	1	9819	D113_BE.raw	0	0	P36957
SYSPYDMLESIR	38.88	1459.67	12	-0.5	730.84	47.67	33100	1	15580	D113_BE.raw	1	1	P07355
LQDEIQNMKEEMAR	38.84	1733.81	14	0.8	578.944	34.6	263000	1	9110	D113_BE.raw	1	1	P08670
LVNEVTEFAK	38.81	1148.61	10	1.5	575.312	35.82	153000	1	9682	D113_BE.raw	1	1	P02768
NNPSKPLHVIK	38.79	1245.72	11	0.8	416.247	24.85	74100	1	4076	D113_BE.raw	1	1	O75083
SVLFVC(+57.02)LGNIC(+57.02)R	38.73	1436.73	12	0.7	719.371	46.63	28500	1	15146	D113_BE.raw	1	1	P24666	Carbamidomethylation	C6:Carbamidomethylation:1000.00;C11:Carbamidomethylation:1000.00
QINWTVLYR	38.71	1191.64	9	1.4	596.828	44.18	0	1	14068	D113_BE.raw	0	0	P83731
YALYDATYETK	38.7	1336.62	11	-0.7	669.316	36.4	90100	1	9978	D113_BE.raw	1	1	P23528
QLPLVKPYLR	38.6	1225.75	10	1.5	409.593	36.05	127000	1	9836	D113_BE.raw	1	1	Q00610
LPSR(+14.02)PPLPGSGGSQSGAK	38.53	1705.91	18	-0.7	569.644	28.77	86400	1	6118	D113_BE.raw	1	1	Q9Y570	Methylation(R)	R4:Methylation(R):1000.00
VTVLFAGQHIAK	38.45	1282.74	12	0.5	428.587	33.66	48200	1	8580	D113_BE.raw	1	1	P21333
HEERQDEHGFISR	38.43	1638.75	13	1.8	410.695	24.72	115000	1	3966	D113_BE.raw	1	1	P02511
TGQATVASGIPAGWMGLDC(+57.02)GPESSKK	38.42	2604.23	26	0.1	869.085	41.54	156000	1	12825	D113_BE.raw	1	1	P00558	Carbamidomethylation	C19:Carbamidomethylation:1000.00
VATVSLPR	38.39	841.502	8	-0.2	421.758	31.11	14800000	1	7054	D113_BE.raw	1	1
TNFFGTR	38.31	841.408	7	1.1	421.712	33.2	300000	1	8290	D113_BE.raw	1	1	P16152
FALPSPQHILGLPVGQHIYLSAR	38.28	2513.39	23	-1.3	629.354	46.58	0	1	15142	D113_BE.raw	0	0	P00387
VELQELNDR	38.25	1114.56	9	0.4	558.288	32.18	222000	1	7789	D113_BE.raw	1	1	P08670
HVLVTLGEK	38.15	994.581	9	-0.3	498.298	28.72	263000	1	6187	D113_BE.raw	1	1	P60660
EPSAPSIPTPAYQSSPAGGHAPTPPTPAPR(+14.02)	38.1	2949.46	30	1.2	984.163	36.49	44400	1	10111	D113_BE.raw	1	1	Q8WUM4	Methylation(R)	R30:Methylation(R):1000.00
HLQLAIR	38.08	849.518	7	0.3	425.767	29.41	9410000	1	6614	D113_BE.raw	1	1	Q99878:Q96KK5:Q16777:Q9BTM1:P20671:P0C0S8:Q6FI13:Q93077:P04908:Q7L7L0:Q71UI9:P0C0S5
GR(+14.02)GAAPPPPPVPR(+14.02)	38.06	1295.75	13	0.1	432.923	26.67	71700	1	5136	D113_BE.raw	1	1	Q07666	Methylation(R)	R2:Methylation(R):1000.00;R13:Methylation(R):1000.00
EQYQQQQQWGSR(+14.02)	38	1578.72	12	-0.9	790.365	28.59	439000	1	5981	D113_BE.raw	1	1	Q14103	Methylation(R)	R12:Methylation(R):1000.00
YIC(+57.02)ENQDSISSK	37.83	1442.63	12	0	722.325	27.23	105000	1	5332	D113_BE.raw	1	1	P02768	Carbamidomethylation	C3:Carbamidomethylation:1000.00
SAITPGGLR	37.77	870.492	9	0.1	436.253	28.81	101000	1	6113	D113_BE.raw	1	1	P34897
GMGPGTPAGYGR(+14.02)	37.77	1133.53	12	0.8	567.772	29.14	265000	1	6193	D113_BE.raw	1	1	P23246	Methylation(R)	R12:Methylation(R):1000.00
GPGGPR(+14.02)GGLGGGMR	37.75	1238.63	14	0.9	413.884	25.16	209000	1	4334	D113_BE.raw	1	1	Q13283	Methylation(R)	R6:Methylation(R):63.44
RGNMPQR(+14.02)GGGGGGSGGIGYPYPR	37.73	2261.09	23	1.7	566.28	29.01	83000	1	6172	D113_BE.raw	1	1	Q00839	Methylation(R)	R7:Methylation(R):0.00
WQNVHFHR	37.71	1122.55	8	1.4	375.19	26.49	81800	1	5023	D113_BE.raw	1	1	Q13557
TFIAIKPDGVQR	37.65	1343.76	12	0	448.926	32.97	214000	1	8205	D113_BE.raw	1	1	P22392
TAAYVNAIEK	37.56	1078.57	10	0.2	540.29	30.25	110000	1	6842	D113_BE.raw	1	1	P00367
TARPNITDNKDGTITVR	37.45	1870.99	17	1	624.67	27.36	23400	1	5424	D113_BE.raw	1	1	Q14315
LC(+57.02)TVATLR	37.37	932.511	8	0.4	467.263	30.58	577000	1	6944	D113_BE.raw	1	1	P02768	Carbamidomethylation	C2:Carbamidomethylation:1000.00
GPSGLLVYQGK	37.26	1117.61	11	0.3	559.814	35.53	144000	1	9488	D113_BE.raw	1	1	P00387
QDIAFAYQR	37.23	1110.55	9	0.3	556.28	35.19	39800	1	9436	D113_BE.raw	1	1	P07355
QYASLTGTQALPPLFSLGYHQSR	37.19	2534.29	23	-2.5	845.769	46.84	180000	1	15345	D113_BE.raw	1	1	Q14697
TSETKHDTSLKPISVSYNPATAK	37.16	2474.27	23	1	619.574	30.01	48700	1	6687	D113_BE.raw	1	1	P00915
LSVDYGKK	36.76	908.497	8	0.5	303.84	24.97	111000	1	4198	D113_BE.raw	2	2	Q71U36:P68363:Q9BQE3
VFIGNLNTLVVK	36.66	1315.79	12	0.5	658.901	44.72	216000	1	14242	D113_BE.raw	1	1	P07910
FPGQLNADLR	36.63	1129.59	10	1.3	565.802	36.92	299000	1	10321	D113_BE.raw	1	1	P07437:Q13885:Q9BVA1:P68371:Q13509:Q9BUF5
HVTFNQVK	36.61	971.519	8	0.9	486.767	24.93	54600	1	4147	D113_BE.raw	1	1	P23381
HYGGLTGLNKAETAAK	36.55	1629.85	16	1.4	544.29	27.97	0	1	5750	D113_BE.raw	0	0	P18669
SLYYYIQQDTK	36.52	1420.69	11	0.7	711.351	39.47	351000	1	11536	D113_BE.raw	1	1	P07355
R(+14.02)GGFDRPSYDR	36.52	1338.64	11	1.2	447.222	25.01	95200	1	4200	D113_BE.raw	1	1	P49750	Methylation(R)	R1:Methylation(R):45.16
RGASQASGPLPGPHFPLPGR(+14.02)GEVWGPGYR	36.51	3013.54	29	1	754.394	40.6	198000	1	12311	D113_BE.raw	2	2	Q15654	Methylation(R)	R20:Methylation(R):8.95
NMGGPYGGGNYGPGGSGGSGGYGGR	36.5	2188.9	25	1.4	1095.46	32.8	13500	1	8163	D113_BE.raw	1	1	P22626
VQVSYKGETK	36.49	1137.6	10	0.4	380.208	24.68	33500	1	3929	D113_BE.raw	1	1	P0DMV9:P0DMV8
TYGFHFTTPALVVEK	36.43	1708.88	15	0.1	570.635	42.34	29300	1	13205	D113_BE.raw	1	1	O43237
LEKPAKYDDIKK	36.35	1446.81	12	0	362.709	24.68	117000	1	3915	D113_BE.raw	1	1	P04406
R(+14.02)GGFNTFR	36.26	967.499	8	0.7	484.757	26.74	693000	1	5127	D113_BE.raw	1	1	P17844	Methylation(R)	R1:Methylation(R):80.73
WLPSSSPVTGYR	36.15	1348.68	12	0.1	675.346	38.05	67000	1	10919	D113_BE.raw	1	1	P02751
SGYLLPDTK	36.12	992.518	9	0	497.266	34.38	67500	1	8999	D113_BE.raw	1	1	P14625
LVILANNC(+57.02)PALR	36.12	1352.76	12	-1.3	677.386	39.32	31300	1	11609	D113_BE.raw	1	1	P62888	Carbamidomethylation	C8:Carbamidomethylation:1000.00
LFFLQVK	36.11	893.537	7	0.2	447.776	45.11	1130000	1	14556	D113_BE.raw	1	1	P15311
VLANPGNSQVAR	36.02	1224.66	12	1.1	613.337	26.06	23700	1	4857	D113_BE.raw	1	1	Q14974
SPYLYPLYGLGELPQGFAR	36.02	2140.1	19	0.7	1071.06	52	0	1	17635	D113_BE.raw	0	0	P31150
TALLSLFGIPLWYHSQSPR	36.02	2185.17	19	0.4	729.397	52.01	0	1	17645	D113_BE.raw	0	0	Q9UH99
GVNSFMVYMAYK	35.97	1408.65	12	2.1	705.335	45.59	0	1	14735	D113_BE.raw	0	0	Q14195
SSSMSVTGGRGGPR(+14.02)PVSSSIDPSLLSTK	35.95	2760.41	28	0	691.109	35.46	0	1	9515	D113_BE.raw	0	0	Q8NEY1	Methylation(R)	R14:Methylation(R):11.12
SKFADLTDAAAR	35.92	1264.64	12	-0.3	633.328	31.13	60400	1	7243	D113_BE.raw	1	1	P14136
DHGVNSFLVYMAFK	35.9	1626.79	14	-1.1	814.399	49.08	18500	1	16140	D113_BE.raw	1	1	Q16555
ASGPPVSELITK	35.77	1197.66	12	0.3	599.838	36.09	48500	1	9821	D113_BE.raw	1	1	P16403:P10412:P16402
IGKPAPDFK	35.66	971.544	9	1.4	324.856	25.35	50000	1	4461	D113_BE.raw	1	1	P32119
AVLHVHGGGGPR	35.6	1155.63	12	1.5	386.217	24.57	29000	1	3862	D113_BE.raw	1	1	P98160
TNRPPLSLSR	35.46	1139.64	10	1.1	380.888	27.23	181000	1	5318	D113_BE.raw	1	1	Q07020
KESYSIYVYK	35.42	1278.65	10	1.3	640.333	31.82	268000	1	7624	D113_BE.raw	1	1	Q16778:P23527:P33778:Q8N257:P06899
HAVGPVVVHC(+57.02)SAGVGR	35.33	1600.83	16	1.5	534.617	26.59	23500	1	5097	D113_BE.raw	1	1	P23471	Carbamidomethylation	C10:Carbamidomethylation:1000.00
WFYIASAFR	35.32	1159.58	9	0.3	580.798	48.29	153000	1	15799	D113_BE.raw	1	1	P19652:P02763
AVVGLSGDASKR(+18.04)	35.29	1176.67	12	-0.2	589.344	29.72	57600	1	6539	D113_BE.raw	1	1	Q8N3P4	Methyl:2H(3)13C(1)	R12:Methyl:2H(3)13C(1):1000.00
GLYDGPVC(+57.02)EVSVTPK	35.25	1619.79	15	1	810.901	39.34	66600	1	11626	D113_BE.raw	1	1	Q16555	Carbamidomethylation	C8:Carbamidomethylation:1000.00
TLVLLMGK	35.23	873.536	8	0	437.775	41.22	544000	1	12584	D113_BE.raw	1	1	P07737
HSAYSYC(+57.02)GR(+14.02)GFYPQYGALETR	35.09	2496.13	21	0.6	625.04	36.36	104000	1	10021	D113_BE.raw	1	1	Q63ZY3	Carbamidomethylation; Methylation(R)	C7:Carbamidomethylation:1000.00;R9:Methylation(R):57.87
GGYGGGGSGGGGR(+14.02)GGFPSGGGGGGGQQR	34.93	2265	28	-0.5	756.008	25.19	13600	1	4375	D113_BE.raw	1	1	P35637	Methylation(R)	R13:Methylation(R):19.24
VGVNGFGR	34.83	804.424	8	0.6	403.22	29.49	891000	1	6525	D113_BE.raw	1	1	P04406
VHPVSTMIK	34.82	1010.56	9	0.6	506.287	26.19	83100	1	4916	D113_BE.raw	1	1	P00338
TPC(+57.02)TVSC(+57.02)NIPVVSGK	34.79	1617.79	15	-0.1	809.9	34.97	259000	1	9201	D113_BE.raw	1	1	P02675	Carbamidomethylation	C3:Carbamidomethylation:1000.00;C7:Carbamidomethylation:1000.00
VEVERDNLAEDIMR	34.79	1687.82	14	0.4	563.614	37.47	283000	1	10609	D113_BE.raw	1	1	P08670
TATESFASDPILYRPVAVALDTK	34.77	2464.28	23	-0.8	822.435	45.66	157000	1	14771	D113_BE.raw	2	2	P14618
LHPFHVIR	34.75	1017.59	8	-0.5	340.203	30.54	57300	1	6989	D113_BE.raw	1	1	Q96L21:P27635
YSAELHVAHWNSAK	34.72	1611.78	14	0.5	538.267	30.04	200000	1	6693	D113_BE.raw	1	1	P00915
DQVANSAFVER	34.68	1234.59	11	1.9	618.306	32.08	58100	1	7815	D113_BE.raw	1	1	P07900
GGVAGR(+14.02)GGFAQGGHSQGHVVPGGGLEGGGVASQDR	34.61	3185.55	35	0.1	797.394	30.17	233000	1	6836	D113_BE.raw	2	2	Q14151	Methylation(R)	R6:Methylation(R):39.75
QTVAVGVIK	34.51	913.56	9	1.6	457.788	30.61	321000	1	6964	D113_BE.raw	1	1	P68104:Q5VTE0
KKGTVVYGEPITASLGTDGSHYWSK	34.5	2680.35	25	-1.4	671.094	37.44	87800	1	10568	D113_BE.raw	1	1	Q16555
IEVIEIMTDR	34.41	1217.63	10	1.1	609.824	44.26	8000	1	14120	D113_BE.raw	1	1	P09651
KVESLQEEIAFLK	34.39	1532.85	13	0.7	767.43	41.93	0	1	12994	D113_BE.raw	0	0	P08670
MSGR(+14.02)GVGSVSQFK	34.32	1352.69	13	0.8	451.903	27.48	208000	1	5472	D113_BE.raw	1	1	Q5T5U3	Methylation(R)	R4:Methylation(R):1000.00
HPEYAVSVLLR	34.25	1282.7	11	1	642.36	37.94	191000	1	10887	D113_BE.raw	1	1
FVIKPIDKK	34.23	1086.68	9	0.8	363.234	26.86	457000	1	5222	D113_BE.raw	1	1	P15311
EELLSFMGAEEAAPDPAGVGR(+14.02)GGGVAGPPSGGGGQPQWQK	34.14	3861.84	40	-0.4	1288.29	45.29	0	1	14593	D113_BE.raw	0	0	Q9NRF2	Methylation(R)	R21:Methylation(R):1000.00
GSGGGSSGGSIGGR(+14.02)GSSSGGVK	34.12	1764.84	22	1	589.286	24.5	22700	1	3766	D113_BE.raw	1	1	P04264	Methylation(R)	R14:Methylation(R):1000.00
DAFVAIVQSVK	34.1	1175.65	11	1.1	588.835	45.22	228000	1	14473	D113_BE.raw	1	1	P08133
VNVDAVGGEALGR	34.08	1255.65	13	1	628.834	34.71	108000	1	9200	D113_BE.raw	1	1	P02042
VAVVNQIAR	34.01	968.577	9	0.5	485.296	29.65	43800	1	6553	D113_BE.raw	1	1	Q01082
LNFAVASR	33.94	876.482	8	0.9	439.248	33.44	74400	1	8470	D113_BE.raw	1	1	P30101
GR(+14.02)GAPPPPPSR	33.8	1101.6	11	0.7	368.209	24.52	90400	1	3794	D113_BE.raw	1	1	O00401	Methylation(R)	R2:Methylation(R):48.96
GGFGAR(+14.02)GGGGLPPKK	33.68	1368.76	15	0.9	457.262	24.7	242000	1	3950	D113_BE.raw	1	1	Q92841	Methylation(R)	R6:Methylation(R):1000.00
STVDAPTAAGR(+14.02)GR(+14.02)	33.57	1285.67	13	1.1	429.566	24.75	20700	1	3996	D113_BE.raw	1	1	Q99832	Methylation(R)	R11:Methylation(R):1000.00;R13:Methylation(R):1000.00
ALSRQEMQEVQSSR	33.48	1647.8	14	1	550.274	26.3	15700	1	4971	D113_BE.raw	1	1	P22626
TNVNGGAIALGHPLGGSGSR	33.28	1833.94	20	-0.1	612.322	32.09	54800	1	7712	D113_BE.raw	1	1	P42765
QLIVGVNK	33.26	869.533	8	1.1	435.774	30.6	329000	1	6935	D113_BE.raw	1	1	P68104:Q5VTE0
LLLPGELAK	33.22	952.596	9	0.4	477.305	40.01	987000	1	11944	D113_BE.raw	1	1	Q99879:P62807:Q99877:Q99880:Q93079:Q5QNW6:P58876:O60814:Q16778:P23527:P33778:Q8N257:P06899
IDIIPNPQER	33.16	1193.64	10	-0.7	597.827	37.8	32900	1	10786	D113_BE.raw	1	1	P08238
FNHFSLTLNTNHGHILVDYSK	33.15	2456.22	21	1.3	615.064	39.83	173000	1	11876	D113_BE.raw	1	1	P06744
IVATKPLYVALAQR	33.11	1541.93	14	1.8	514.985	37.13	63100	1	10378	D113_BE.raw	1	1	P11940:Q9H361
FRC(+57.02)PEALFQPSFLGMESC(+57.02)GIHETTFNSIMK	33.1	3533.62	30	-0.9	884.413	48.64	0	1	15954	D113_BE.raw	0	0	P60709:P63261	Carbamidomethylation	C3:Carbamidomethylation:1000.00;C18:Carbamidomethylation:1000.00
ALLFVPR	33.05	814.506	7	1.5	408.261	40.61	210000	1	12247	D113_BE.raw	1	1	P07900
AILFVPR	33.05	814.506	7	1.5	408.261	40.61	210000	1	12247	D113_BE.raw	1	1
HNFTPLAR	33.03	954.504	8	0.2	478.259	26.9	108000	1	5228	D113_BE.raw	1	1	P42765
SGVLSVSSGAAAHR	32.88	1297.67	14	0.8	433.566	26.45	18200	1	4995	D113_BE.raw	1	1	Q16363
SGRGGNFGFGDSR	32.74	1312.59	13	0.8	438.538	27.66	145000	1	5525	D113_BE.raw	1	1	P22626
LSNRPAFMPSEGR	32.74	1460.72	13	0.1	487.914	30.2	83800	1	6799	D113_BE.raw	1	1	P12814
TDEGIAYR	32.72	923.435	8	0	462.725	27.11	83500	1	5309	D113_BE.raw	1	1	P32119
TQTVC(+57.02)NFTDGALVQHQEWDGK	32.67	2433.1	21	0.7	812.042	38.66	225000	1	11160	D113_BE.raw	1	1	Q01469	Carbamidomethylation	C5:Carbamidomethylation:1000.00
TLSDYNIQK	32.66	1080.55	9	0.8	541.28	29.98	605000	1	6600	D113_BE.raw	1	1	P62987:P62979:P0CG47:P0CG48
VVIIGAGKPAAVVLQTK	32.63	1663.04	17	0.2	555.354	37.03	348000	1	10255	D113_BE.raw	1	1	Q14697
AITIASQTNC(+57.02)PLYVTK	32.57	1778.92	16	-0.8	890.468	38.54	210000	1	11100	D113_BE.raw	1	1	Q14195	Carbamidomethylation	C10:Carbamidomethylation:1000.00
TFVSGAC(+57.02)DASIK	32.52	1254.59	12	0.4	628.303	31.37	164000	1	7389	D113_BE.raw	1	1	P62879	Carbamidomethylation	C7:Carbamidomethylation:1000.00
TVFDEAIR	32.49	949.487	8	1.3	475.751	36.02	211000	1	9789	D113_BE.raw	1	1	P63000
KPLYHYGR(+14.02)	32.44	1046.57	8	1.5	349.863	24.77	41500	1	4024	D113_BE.raw	1	1	Q8N4C8	Methylation(R)	R8:Methylation(R):1000.00
TIFAYFTGSK	32.42	1133.58	10	1.3	567.796	44.68	121000	1	14420	D113_BE.raw	1	1	Q9BRA2
LVVPATQC(+57.02)GSLIGK	32.36	1441.8	14	-0.7	721.905	37.93	56100	1	10822	D113_BE.raw	1	1	Q15365	Carbamidomethylation	C8:Carbamidomethylation:1000.00
LLGWIQNK	32.31	970.56	8	1	486.288	39.67	577000	1	11904	D113_BE.raw	1	1	Q14315:P21333
SIVNYKPK	32.29	947.544	8	-0.1	474.779	25.23	34700	1	4394	D113_BE.raw	1	1	P12814
ISEQFTAMFR	32.26	1228.59	10	1	615.303	42.89	232000	1	13612	D113_BE.raw	1	1	P07437:Q13885:Q9BVA1:P68371:Q13509
MSVIWDK	32.17	877.437	7	1.4	439.726	37.11	37000	1	10368	D113_BE.raw	1	1	Q16555:Q14195
LVVPASQC(+57.02)GSLIGK	32.13	1427.78	14	-0.2	714.898	37.06	59800	1	10346	D113_BE.raw	1	1	Q15366	Carbamidomethylation	C8:Carbamidomethylation:1000.00
VLIAAHGNSLR	32.08	1149.66	11	1.4	575.839	27.13	301000	1	5378	D113_BE.raw	2	2	P18669
YRPGTVALR	32.01	1031.59	9	1.5	516.802	26.48	2450000	1	5013	D113_BE.raw	1	1	Q6NXT2:P68431:P84243:Q71DI3:Q16695
LLIGTLYHR	31.93	1084.64	9	0.7	543.327	36.12	90500	1	9818	D113_BE.raw	1	1	Q15165
QVVESAYEVIK	31.9	1263.67	11	1.3	632.844	36.2	42100	1	9837	D113_BE.raw	1	1	P00338
KAVLFC(+57.02)LSEDKK	31.9	1436.77	12	1.8	479.931	30.73	82800	1	7075	D113_BE.raw	1	1	P23528	Carbamidomethylation	C6:Carbamidomethylation:1000.00
YLYEIAR	31.89	926.486	7	0.8	464.251	35.21	929000	1	9486	D113_BE.raw	1	1	P02768
VVTYGMANLLTGPK	31.83	1462.79	14	1.9	732.401	43.96	0	1	13988	D113_BE.raw	0	0	Q99536
SIAFPSIGSGR	31.75	1090.58	11	0.8	546.296	39.41	22800	1	11650	D113_BE.raw	1	1	O75367
ALTVPELTQQVFDAK	31.64	1658.89	15	1.2	830.452	47.58	0	1	15542	D113_BE.raw	0	0	P07437
GMGPGTPAGYGR(+14.02)GR	31.49	1346.65	14	2	449.892	25.67	4290000	1	4751	D113_BE.raw	1	1	P23246	Methylation(R)	R12:Methylation(R):7.32
STNVTVAAAR(+14.02)	31.48	1002.55	10	0.3	502.28	25.58	112000	1	4589	D113_BE.raw	1	1	Q5BKZ1	Methylation(R)	R10:Methylation(R):1000.00
HLPSTEPDPHVVR	31.47	1482.76	13	0.6	495.26	26.54	12800	1	5075	D113_BE.raw	1	1	Q9BUJ2
SGRGTGR(+14.02)GGGGGGGGGAPRGR	31.24	1753.88	21	-0.2	439.477	24.33	132000	1	3639	D113_BE.raw	1	1	Q07955	Methylation(R)	R7:Methylation(R):0.00
AQAAAPASVPAQAPK	31.19	1376.74	15	-1	689.377	27.12	11900	1	5311	D113_BE.raw	1	1	P47914
IVAPPGGR(+14.02)SNITSLS	31.16	1481.82	15	1.8	741.919	35.13	126000	1	9308	D113_BE.raw	1	1	Q14195	Methylation(R)	R8:Methylation(R):1000.00
TAGYPNVNIHNFTTSWR	31.09	1976.95	17	-0.6	659.99	40.8	83700	1	12448	D113_BE.raw	1	1	Q01082
SVVLMSHLGRPDGVPMPDKYSLEPVAVELK	31.08	3262.71	30	0.6	816.685	44.19	90500	1	14108	D113_BE.raw	1	1	P00558
RPAQSVNR(+14.02)GGMTR	30.98	1442.75	13	0.3	481.925	24.47	412000	1	3737	D113_BE.raw	1	1	Q86V81	Methylation(R)	R8:Methylation(R):25.58
HLAGLGLTEAIDKNK	30.98	1578.87	15	1.1	527.299	33.52	65400	1	8507	D113_BE.raw	1	1	P50454
EAAENSLVAYK	30.88	1193.59	11	2.1	597.805	31.42	29900	1	7420	D113_BE.raw	1	1	P62258
GGNFGFGDSR(+14.02)GGGGNFGPGPGSNFRGGSDGYGSGR	30.84	3278.43	35	-0.6	820.613	35.99	3930000	1	9917	D113_BE.raw	1	1	P22626	Methylation(R)	R10:Methylation(R):0.00
IVVVTAGVR	30.73	912.576	9	0.3	457.295	31.93	206000	1	7709	D113_BE.raw	1	1	P07195
GNLANVIR	30.62	855.493	8	0.6	428.754	31.07	120000	1	7180	D113_BE.raw	1	1	P12235:P05141:P12236:Q9H0C2
GGSGSGPTIEEVD	30.61	1203.53	13	0.6	602.77	34.91	46400	1	9192	D113_BE.raw	1	1	P0DMV9:P0DMV8
TVIDYNGER	30.6	1065.51	9	0.1	533.762	29.01	145000	1	6169	D113_BE.raw	1	1	P07237
YIC(+57.02)DNQDTISSK	30.54	1442.63	12	-0.2	722.324	27.79	336000	1	5588	D113_BE.raw	1	1		Carbamidomethylation	C3:Carbamidomethylation:1000.00
LVVEC(+57.02)VMNNVTC(+57.02)TR	30.48	1693.8	14	0.3	847.905	40.39	356000	1	12337	D113_BE.raw	1	1	Q01469	Carbamidomethylation	C5:Carbamidomethylation:1000.00;C12:Carbamidomethylation:1000.00
LYC(+57.02)IYVAIGQK	30.47	1326.7	11	-1.3	664.357	42.27	63400	1	13167	D113_BE.raw	1	1	P25705	Carbamidomethylation	C3:Carbamidomethylation:1000.00
GGPFSDSYR	30.43	984.43	9	1.4	493.223	30.92	53300	1	7108	D113_BE.raw	1	1	P00915
RGGSLPPHTQVHGSR	30.43	1584.82	15	0	397.213	24.47	248000	1	3783	D113_BE.raw	1	1	P98160
IGLGGR(+14.02)GGSGGSYGR	30.41	1363.7	15	0.2	455.572	25.89	95100	1	4776	D113_BE.raw	1	1	P35527	Methylation(R)	R6:Methylation(R):36.38
VIFGLFGK	30.39	879.522	8	0	440.768	46.68	253000	1	15144	D113_BE.raw	1	1	P23284
LSGFSFK	30.38	784.412	7	0.5	393.213	36.66	119000	1	10087	D113_BE.raw	1	1	P29966
GRPYDYNGPR	30.36	1193.56	10	2.2	398.861	25.43	17900	1	4514	D113_BE.raw	1	1	P13667
LLVTAGASPMALDR	30.34	1413.76	14	0	707.89	57.17	32600	1	20457	D113_BE.raw	1	1	P20749
RVLIAAHGNSLR	30.28	1305.76	12	-0.3	436.261	26.41	0	1	5025	D113_BE.raw	0	0	P18669
VGDTSLDPNDFDFTVTGR(+14.02)GSPSR	30.23	2453.15	23	0.2	818.723	42.07	738000	1	13019	D113_BE.raw	1	1	P51608	Methylation(R)	R18:Methylation(R):17.91
YPIEHGIITNWDDMEK	30.23	1959.9	16	0.8	654.309	40.21	495000	1	12017	D113_BE.raw	1	1	P68032:P68133
R(+14.02)GGHQNSYKPY	30.16	1319.64	11	0.2	440.886	24.55	0	1	3807	D113_BE.raw	0	0	Q14103	Methylation(R)	R1:Methylation(R):1000.00
SGRGGNFGFGDSR(+14.02)GGGGNFGPGPGSNFRGGSDGYGSGR	30.02	3578.58	38	0.5	716.724	34.14	14200000	1	9096	D113_BE.raw	2	2	P22626	Methylation(R)	R13:Methylation(R):1.05
TINEVENQILTR	30.02	1428.76	12	1	715.387	38.4	49700	1	11068	D113_BE.raw	1	1	P12814
VWYVSNIDGTHIAK	30.02	1601.82	14	1.6	534.948	37.59	0	1	10636	D113_BE.raw	0	0	P06744
ATQALVLAPTR	30.01	1139.67	11	-0.6	570.84	34.07	59900	1	8875	D113_BE.raw	1	1	P60842
LLIEMEQR	30	1030.55	8	-0.4	516.281	37.02	0	1	10313	D113_BE.raw	0	0	P12277
GR(+14.02)GLSLSR	30	858.504	8	0.7	430.259	25.14	2430000	1	4304	D113_BE.raw	1	1	P02686	Methylation(R)	R2:Methylation(R):131.63
VLSAPPHFHFGQTNR	29.97	1706.86	15	1.3	427.724	32.67	145000	1	8096	D113_BE.raw	1	1	P26641
THINAVVAK	29.96	951.55	9	0.4	476.783	24.7	21300	1	3928	D113_BE.raw	1	1	Q16799
SYVSSGEMMVGGLAPGR(+14.02)R	29.94	1866.91	18	0.7	623.31	37.91	2990000	1	11131	D113_BE.raw	1	1	P14136	Methylation(R)	R17:Methylation(R):14.02
TVIIEQSWGSPK	29.91	1343.71	12	0.6	672.862	37.64	115000	1	10684	D113_BE.raw	1	1	P10809
AKHHAISAK	29.88	961.546	9	1.3	321.523	24.25	92200	1	3609	D113_BE.raw	1	1	P27824
LSEGR(+14.02)GLPPPPR	29.87	1288.73	12	0.3	430.582	27.27	355000	1	5374	D113_BE.raw	1	1	Q14151	Methylation(R)	R5:Methylation(R):83.89
GHYNNVSC(+57.02)AVFHPR	29.86	1656.76	14	0.8	553.26	29.04	47700	1	6283	D113_BE.raw	1	1	P53621	Carbamidomethylation	C8:Carbamidomethylation:1000.00
EIEDPEDRKPEDWDERPK	29.74	2282.04	18	0	571.519	28.53	279000	1	5951	D113_BE.raw	1	1	P27824
GGGQIIPTAR	29.74	968.54	10	-0.8	485.277	29.25	69200	1	6306	D113_BE.raw	1	1	P13639
SSGPYGGGGQYFAKPR(+14.02)	29.69	1641.79	16	0.4	548.271	29.67	56700	1	6593	D113_BE.raw	1	1	P09651	Methylation(R)	R16:Methylation(R):1000.00
LILVGDPK	29.67	853.527	8	1.3	427.772	29.39	34900	1	6349	D113_BE.raw	1	1	Q86YA3:Q7Z333
STSGGTAALGC(+57.02)LVK	29.63	1320.67	14	0.4	661.343	35.18	125000	1	9383	D113_BE.raw	1	1	P01857:P0DOX5	Carbamidomethylation	C11:Carbamidomethylation:1000.00
LC(+57.02)VLHEK	29.63	897.474	7	1.3	449.745	25.16	64300	1	4335	D113_BE.raw	1	1		Carbamidomethylation	C2:Carbamidomethylation:1000.00
FPGQLNADLRK	29.62	1257.68	11	1.1	420.235	31.47	820000	1	7491	D113_BE.raw	1	1	P07437:Q13885:Q9BVA1:P68371:Q13509:Q9BUF5
SLHTLFGDK	29.56	1016.53	9	0.5	509.272	32.14	84600	1	7827	D113_BE.raw	1	1	P02768
GGMSGR(+14.02)GSFAPGGASR	29.52	1464.69	16	0.8	489.237	25.58	58900	1	4592	D113_BE.raw	1	1	Q15424	Methylation(R)	R6:Methylation(R):59.20
ALTTMGFR	29.48	895.459	8	0	448.736	35.11	59700	1	9358	D113_BE.raw	1	1	P30626
GGGGPGGGGPGGGSAGGPSQPPGGGGPGIRK	29.35	2397.15	31	0.9	800.059	25.66	16300	1	4626	D113_BE.raw	1	1	Q92945
LVAASQAALGL	29.35	1012.59	11	0.7	507.303	44.86	67900	1	14363	D113_BE.raw	1	1	P02768
R(+14.02)GGHQNNYKPY	29.35	1346.65	11	0.9	449.89	24.53	296000	1	3793	D113_BE.raw	1	1	Q99729	Methylation(R)	R1:Methylation(R):1000.00
FFVGGNWK	29.33	953.476	8	1.4	477.746	39.62	469000	1	11706	D113_BE.raw	1	1	P60174
AFGYYGPLR	29.24	1042.52	9	-0.3	522.269	39.02	74300	1	11411	D113_BE.raw	1	1	P84103
YSNSALGHVNC(+57.02)TIK	29.22	1562.75	14	0	521.924	28.34	75800	1	5896	D113_BE.raw	1	1	Q9NQC3	Carbamidomethylation	C11:Carbamidomethylation:1000.00
SVLVSAGNVKR	29.16	1128.66	11	1.4	565.339	25.69	0	1	4654	D113_BE.raw	0	0	Q14204
TEWLDGK	29.15	847.408	7	0.9	424.712	32.06	377000	1	7851	D113_BE.raw	1	1	P62937
LYRPGSVAYVSR	29.06	1366.74	12	1.3	456.586	29.81	106000	1	6537	D113_BE.raw	1	1	P53396
NMSVIAHVDHGK	29.06	1306.65	12	0.5	436.556	25.81	43400	1	4823	D113_BE.raw	1	1	P13639
GGYGGDR(+14.02)GGGYGGDR	29.01	1413.6	15	0.5	472.208	24.68	195000	1	3931	D113_BE.raw	1	1	Q92804	Methylation(R)	R7:Methylation(R):78.57
ITC(+57.02)LC(+57.02)QVPQNAANR	28.99	1643.79	14	1.2	822.902	31.34	0	1	7382	D113_BE.raw	0	0	P49588	Carbamidomethylation	C3:Carbamidomethylation:1000.00;C5:Carbamidomethylation:1000.00
EYQDLLNVK	28.98	1120.58	9	1.5	561.296	38.28	386000	1	10970	D113_BE.raw	1	1	P08670
HLTYENVER	28.86	1159.56	9	0.4	580.789	25.78	66500	1	4708	D113_BE.raw	1	1	Q15907
GFC(+57.02)LPPHC(+57.02)SR	28.83	1229.54	10	1.2	410.856	28.57	514000	1	6720	D113_BE.raw	1	1	P12277	Carbamidomethylation	C3:Carbamidomethylation:1000.00;C8:Carbamidomethylation:1000.00
FQSLGVAFYR	28.8	1186.61	10	1.6	594.315	42.04	267000	1	13018	D113_BE.raw	1	1	P51149
WTAFVKTENSHAAQSARIPSDVK	28.79	2542.29	23	1.8	848.44	43.92	18800	1	13969	D113_BE.raw	1	1	Q9H3W5
FWEVISDEHGIDPTGTYHGDSDLQLDR	28.79	3101.4	27	-1	776.357	43.74	127000	1	13942	D113_BE.raw	1	1	P07437
VEFPR(+14.02)SGR(+14.02)GTGR(+14.02)GGGGGGGGGAPR	28.75	2197.12	24	0.1	550.288	25.14	342000	1	4307	D113_BE.raw	2	2	Q07955	Methylation(R)	R5:Methylation(R):28.18;R8:Methylation(R):26.83;R12:Methylation(R):26.38
GSYGGGDGGYNGFGGDGGNYGGGPGYSSR(+14.02)	28.69	2659.06	29	-0.2	887.36	37.02	180000	1	10292	D113_BE.raw	1	1	P51991	Methylation(R)	R29:Methylation(R):1000.00
ESTLHLVLR	28.66	1066.61	9	0.8	534.314	34.02	119000	1	8731	D113_BE.raw	1	1	P62987:P62979:P0CG47:P0CG48
TASPINSPAR(+14.02)GTPSPK	28.64	1593.85	16	1.1	532.29	25.33	74800	1	4434	D113_BE.raw	1	1	Q9BTV5	Methylation(R)	R10:Methylation(R):1000.00
TTTAAAVASTGPSSR	28.63	1376.69	15	-0.3	689.352	25.53	0	1	4563	D113_BE.raw	0	0	P27816
INFAVFPSLQGGPHNHAIAAVAVALK	28.61	2641.45	26	-0.7	661.369	46.53	0	1	15118	D113_BE.raw	0	0	P34897
YNPTWHC(+57.02)IVGR	28.57	1401.66	11	0.3	468.228	34.04	446000	1	8916	D113_BE.raw	1	1	P63167:Q96FJ2	Carbamidomethylation	C7:Carbamidomethylation:1000.00
MSEGR(+14.02)GLPPPPR	28.52	1306.68	12	-0.2	436.568	26.74	257000	1	5111	D113_BE.raw	1	1	Q15424	Methylation(R)	R5:Methylation(R):72.07
ILFRPVASQLPR	28.49	1395.84	12	0.1	466.286	36.93	224000	1	10223	D113_BE.raw	1	1	P35232
ETNLDSLPLVDTHSK	28.48	1667.84	15	0.6	556.953	37.7	234000	1	10600	D113_BE.raw	1	1	P08670
GFPTIYFSPANK	28.4	1340.68	12	0.1	671.346	43.82	0	1	13930	D113_BE.raw	0	0	P30101
GILAADESTGSIAKR	28.3	1487.79	15	1.7	496.94	29.9	24700	1	6706	D113_BE.raw	1	1	P04075
GYISPYFINTSK	28.25	1388.7	12	0.3	695.356	41.26	240000	1	12599	D113_BE.raw	1	1	P10809
TYGVSFFLVK	28.14	1159.63	10	2.7	580.823	47.19	134000	1	15378	D113_BE.raw	1	1	Q9Y490:Q9Y4G6
MLLYTEVTR	28.1	1124.59	9	0.2	563.302	38.91	90900	1	11385	D113_BE.raw	1	1	P31150
SGGGYGGDRSSGGGYSGDR	28.08	1747.71	19	0.2	583.579	24.6	38800	1	3870	D113_BE.raw	1	1	Q92804
TIEAEAAHGTVTR	28.01	1354.68	13	1.8	452.569	25.27	18100	1	4401	D113_BE.raw	1	1	P48735
KMADLHAVPR	28.01	1136.61	10	0.2	379.878	25.91	31800	1	4851	D113_BE.raw	1	1	Q14195
QVHPDTGISSK	27.96	1167.59	11	0.6	390.204	24.58	38000	1	3856	D113_BE.raw	1	1	Q99879:P62807:Q99877:Q99880:Q93079:Q5QNW6:P58876:O60814:Q16778:P23527:P33778:Q8N257:P06899
FGQGGAGPVGGQGPR(+14.02)GMGPGTPAGYGR(+14.02)GR	27.91	2683.31	29	0.9	671.837	30.51	358000	1	6975	D113_BE.raw	1	1	P23246	Methylation(R)	R15:Methylation(R):4.48;R27:Methylation(R):0.00
IIAPPERK	27.88	922.56	8	0.9	308.527	24.73	110000	1	3977	D113_BE.raw	1	1	P60709:P63261:P68032:P68133
VSFELFADKVPK	27.88	1378.75	12	2.7	690.384	41.25	24200	1	12668	D113_BE.raw	1	1	P62937
KGRPYDYNGPR	27.82	1321.65	11	1.2	441.559	24.82	36000	1	4040	D113_BE.raw	1	1	P13667
TKPIWTR	27.81	900.518	7	0	451.266	26.78	634000	1	5287	D113_BE.raw	1	1	P07900:P08238
ILLNAC(+57.02)C(+57.02)PGWVR	27.79	1457.73	12	-0.4	729.871	41.52	230000	1	12852	D113_BE.raw	1	1	P16152	Carbamidomethylation	C6:Carbamidomethylation:1000.00;C7:Carbamidomethylation:1000.00
LQEEMLQR	27.77	1045.52	8	0.1	523.769	29.9	122000	1	6584	D113_BE.raw	1	1	P08670
EDGGTVGVFSPK	27.76	1191.58	12	0.1	596.796	28.72	22400	1	6076	D113_BE.raw	1	1	O43896
PYQYPALTPEQKK	27.72	1561.81	13	0.7	521.612	30.56	87600	1	6886	D113_BE.raw	1	1	P04075
VNQIGSVTESLQAC(+57.02)K	27.7	1632.81	15	0.3	817.415	35.79	195000	1	9646	D113_BE.raw	1	1	P06733	Carbamidomethylation	C14:Carbamidomethylation:1000.00
VNQIGSVTESIQAC(+57.02)K	27.7	1632.81	15	0.3	817.415	35.79	195000	1	9646	D113_BE.raw	1	1		Carbamidomethylation	C14:Carbamidomethylation:1000.00
DAIPENLPPLTADFAEDKDVC(+57.02)K	27.68	2457.17	22	1.4	820.066	45.09	64000	1	14508	D113_BE.raw	1	1		Carbamidomethylation	C21:Carbamidomethylation:1000.00
NSIGPMGAQR	27.64	1029.5	10	0.3	515.759	27.25	0	1	5379	D113_BE.raw	0	0	Q7RTR2
HDVVFLITK	27.63	1070.61	9	0.7	536.314	36.8	77600	1	10322	D113_BE.raw	1	1	Q00610
C(+57.02)C(+57.02)AAADPHEC(+57.02)YAK	27.62	1551.59	13	0.5	518.204	24.72	26800	1	3975	D113_BE.raw	1	1	P02768	Carbamidomethylation	C1:Carbamidomethylation:1000.00;C2:Carbamidomethylation:1000.00;C10:Carbamidomethylation:1000.00
VTVAGLAGKDPVQC(+57.02)SR	27.61	1656.86	16	0.1	553.295	31.29	87200	1	7342	D113_BE.raw	1	1	Q99497	Carbamidomethylation	C14:Carbamidomethylation:1000.00
LRASGAGKAIGVLTSGGDAQGMNAAVR(+14.02)AVTR	27.6	2968.6	31	1.2	743.158	50.34	439000	1	16678	D113_BE.raw	1	1	P17858	Methylation(R)	R27:Methylation(R):0.00
APVPVR(+14.02)GGPK	27.59	990.597	10	-0.3	331.206	24.62	41000	1	3873	D113_BE.raw	1	1	Q12906	Methylation(R)	R6:Methylation(R):1000.00
GGNFSGR(+14.02)GGFGGSR	27.52	1325.62	14	-0.4	442.881	25.47	2130000	1	4499	D113_BE.raw	1	1	P09651	Methylation(R)	R7:Methylation(R):66.44
HGLYLPTR	27.52	955.524	8	-0.3	478.769	29.28	80900	1	6386	D113_BE.raw	1	1	P49327
KGHVSFKPSLDQQR	27.47	1625.86	14	0.6	407.474	27.48	0	1	5498	D113_BE.raw	0	0	Q06033
ASR(+14.02)GGGNHQNNYQPY	27.42	1675.75	15	1.3	559.59	24.75	298000	1	3990	D113_BE.raw	1	1	O14979	Methylation(R)	R3:Methylation(R):1000.00
GAPTTSLISVAVTK	27.4	1343.77	14	0.8	672.891	39.26	87100	1	11510	D113_BE.raw	1	1	P49419
SSGSGAGGGGR(+14.02)GGKASGDPGASGMSPR	27.39	2275.04	27	0.9	569.767	24.55	18300	1	3816	D113_BE.raw	1	1	Q8NDT2	Methylation(R)	R11:Methylation(R):44.20
GGNFGGGGGNFGR(+14.02)GGNFGGR	27.36	1811.82	20	0.8	604.948	30.22	276000	1	6738	D113_BE.raw	1	1	P51991	Methylation(R)	R13:Methylation(R):17.70
TQIDHYVGIAR	27.26	1271.66	11	-0.7	424.894	31.11	493000	1	7202	D113_BE.raw	2	2	O95197
TGVAVNKPAEFTVDAK	27.25	1645.87	16	1.3	549.63	31.59	46000	1	7561	D113_BE.raw	1	1	P21333
TFDSIVMDPK	27.25	1151.55	10	1	576.784	38.85	68700	1	11310	D113_BE.raw	1	1	P13667
VVNIVPVIAK	27.2	1050.68	10	1	526.348	39.84	0	1	11909	D113_BE.raw	0	0	Q9UHD8
TGSETPQAPMSGVGPVSGGPGGFGR(+14.02)GSQGGNFEGPNKRR	27.19	3784.81	39	0.1	947.21	33.55	338000	1	8539	D113_BE.raw	1	1	Q8WXF1	Methylation(R)	R25:Methylation(R):3.89
SHGLEPAAPSPR	27.18	1217.62	12	1.1	609.816	32.57	214000	1	7995	D113_BE.raw	1	1	Q9ULL5
C(+57.02)PEALFQPSFLGMESC(+57.02)GIHETTFNSIMK	27.17	3230.45	28	0	1077.83	49.76	0	1	16439	D113_BE.raw	0	0	P60709:P63261	Carbamidomethylation	C1:Carbamidomethylation:1000.00;C16:Carbamidomethylation:1000.00
LVSIGAEEIVDGNVK	27.11	1541.83	15	1.4	771.923	41.18	0	1	12624	D113_BE.raw	0	0	P12814
ASESPARGPSGSPRTQGR(+14.02)GGPASVPSSSPGTSVK	27.11	3206.6	34	0.3	642.328	25.42	126000	1	4550	D113_BE.raw	1	1	O43237	Methylation(R)	R18:Methylation(R):0.45
FFGGDR(+14.02)GAPK	27.09	1064.54	10	0.1	533.278	26.22	79600	1	4938	D113_BE.raw	1	1	P02686	Methylation(R)	R6:Methylation(R):1000.00
TGSETPQAPMSGVGPVSGGPGGFGR(+14.02)GSQGGNFEGPNK	27.08	3472.61	37	0	1158.54	37.26	461000	1	10426	D113_BE.raw	1	1	Q8WXF1	Methylation(R)	R25:Methylation(R):1000.00
TPGTPGTPSYPR	27.08	1229.6	12	0.7	615.81	28.42	0	1	5935	D113_BE.raw	0	0	P11137
GPPPPGR(+14.02)GGPPPPPPPATGR	27.07	1869	20	0.8	624.008	26.37	62900	1	4997	D113_BE.raw	1	1	P42768	Methylation(R)	R7:Methylation(R):28.31
ALPAPIEK	27.04	837.496	8	1.1	419.756	29.73	67000	1	6545	D113_BE.raw	1	1	P01857:P0DOX5
LPNLGKHEK	27.03	1034.59	9	1.4	345.87	24.6	31300	1	3847	D113_BE.raw	1	1	P12277
FASYIEK	27.03	856.433	7	0	429.224	29.84	1110000	1	6472	D113_BE.raw	1	1	P14136
FATHAAALSVR	27.01	1142.62	11	0.5	381.881	28.13	43300	1	5825	D113_BE.raw	1	1	P23246
MMVAGFKK	26.93	910.477	8	1.3	456.246	27.31	29400	1	5377	D113_BE.raw	1	1	Q00839
GPANGFR(+14.02)GGYDGYRPSFSNTPNSGYTQSQFSAPR	26.85	3653.67	34	1.1	914.425	37.18	0	1	10405	D113_BE.raw	0	0	Q14444	Methylation(R)	R7:Methylation(R):8.82
EEKPAVTAAPK	26.85	1139.62	11	1.3	380.881	24.58	14000	1	3857	D113_BE.raw	1	1	P02511
ESESC(+57.02)DC(+57.02)LQGFQLTHSLGGGTGSGMGTLLISK	26.8	3326.52	32	0.7	1109.85	46.19	0	1	14974	D113_BE.raw	0	0	Q13885:Q9BVA1	Carbamidomethylation	C5:Carbamidomethylation:1000.00;C7:Carbamidomethylation:1000.00
FANYIDK	26.78	869.428	7	-0.3	435.721	30.3	318000	1	6851	D113_BE.raw	1	1	P08670
LTFDSSFSPNTGKK	26.78	1527.76	14	0.8	510.26	33.44	0	1	8489	D113_BE.raw	0	0	P21796
GGNFGFGDSRGGGGNFGPGPGSNFRGGSDGYGSGR	26.75	3264.41	35	-0.8	817.109	35.87	1890000	1	9834	D113_BE.raw	1	1	P22626
R(+14.02)PATAETGGGAAAVAR(+18.04)RNER(+14.02)	26.65	2056.12	20	0.1	686.379	43.01	10600	1	13574	D113_BE.raw	1	1	Q99929	Methylation(R); Methyl:2H(3)13C(1)	R1:Methylation(R):7.81;R16:Methyl:2H(3)13C(1):0.00;R20:Methylation(R):0.00
LVIVGDGAC(+57.02)GK	26.62	1087.57	11	1.5	544.793	31.89	8890	1	7643	D113_BE.raw	1	1	P61586:P08134	Carbamidomethylation	C9:Carbamidomethylation:1000.00
TLHPDLGTDKDKEQWK	26.61	1909.95	16	0.5	478.496	27.9	274000	1	5714	D113_BE.raw	1	1	P00338
GGYGGDR(+14.02)GGGSGYGGDR	26.61	1557.66	17	1.3	520.226	24.68	108000	1	3927	D113_BE.raw	1	1	Q92804	Methylation(R)	R7:Methylation(R):41.01
NMGGPYGGGNYGPGGSGGSGGYGGR(+14.02)SR	26.55	2446.05	27	0.6	816.357	29.55	669000	1	6361	D113_BE.raw	1	1	P22626	Methylation(R)	R25:Methylation(R):15.73
TTPSYVAFTDTERLIGDAAKNQVALNPQNTVFDAKR	26.5	3951.01	36	-0.2	791.21	46.76	1010000	1	15185	D113_BE.raw	1	1	P0DMV9:P0DMV8
GGSDGYGSGR(+14.02)GFGDGYNGYGGGPGGGNFGGSPGYGGGR(+14.02)	26.49	3415.43	38	-1.1	1139.48	37.29	11800	1	10465	D113_BE.raw	1	1	P22626	Methylation(R)	R10:Methylation(R):1000.00;R38:Methylation(R):1000.00
HLQLAVR	26.48	835.503	7	-0.5	418.759	26.9	267000	1	5216	D113_BE.raw	1	1	Q8IUE6
QSPLSSSSPFSNR(+14.02)PPLPPTPSR	26.43	2349.21	22	0.7	784.077	38.11	446000	1	10929	D113_BE.raw	1	1	O43516	Methylation(R)	R13:Methylation(R):22.90
EVWYFGLHYVDNK	26.4	1668.79	13	1.3	557.273	44.19	103000	1	14106	D113_BE.raw	1	1	P15311
IQVWHAEHR	26.38	1174.6	9	-0.3	392.54	25.59	54200	1	4669	D113_BE.raw	1	1	P15311
GGNFGFGDSR(+14.02)GGGGNFGPGPGSNFR(+14.02)GGSDGYGSGR	26.34	3292.44	35	0.2	824.118	36.16	227000	1	9885	D113_BE.raw	1	1	P22626	Methylation(R)	R10:Methylation(R):12.50;R25:Methylation(R):13.58
TTPSVVAFTADGER	26.23	1449.71	14	0.9	725.863	37.39	44900	1	10543	D113_BE.raw	1	1	P38646
MQHLIAR	26.19	867.475	7	-0.2	290.166	25.01	30200	1	4217	D113_BE.raw	1	1	P14618
HGESAWNLENR	26.12	1311.6	11	1	656.806	29.17	101000	1	6275	D113_BE.raw	2	2	P18669
LGPGTR(+14.02)LSLAR	26.11	1153.69	11	0.6	577.854	30.9	251000	1	7266	D113_BE.raw	1	1	P14136	Methylation(R)	R6:Methylation(R):41.96
ESYSVYVYK	26.1	1136.54	9	0.4	569.277	34.98	423000	1	9213	D113_BE.raw	1	1	Q99879:P62807:Q99877:Q99880:Q93079:Q5QNW6:P58876:O60814
LTPITYPQGLAMAK	26.1	1502.82	14	-0.8	752.415	41.75	0	1	12906	D113_BE.raw	0	0	P63000
FSEVLKR	26.08	877.502	7	1.4	293.508	25.66	20200	1	4621	D113_BE.raw	1	1	P12277
GAAAAAAASGAAGGGGGGAGAGAPGGGR(+18.04)LLLSTSLDAK	26.07	3011.57	38	0.7	753.899	45.91	202000	1	14822	D113_BE.raw	1	1	Q68E01	Methyl:2H(3)13C(1)	R28:Methyl:2H(3)13C(1):1000.00
IYFMAGSSR	26.07	1030.49	9	0.6	516.253	35.67	227000	1	9550	D113_BE.raw	1	1	P14625
SVLQAVQK	26.02	871.513	8	0.4	436.764	26.58	40800	1	5080	D113_BE.raw	1	1	Q16799
SVIQAVQK	26.02	871.513	8	0.4	436.764	26.58	40800	1	5080	D113_BE.raw	1	1	O95197
ALSIGFETC(+57.02)R	25.97	1152.56	10	1.2	577.288	38.33	0	1	11058	D113_BE.raw	0	0	P16070	Carbamidomethylation	C9:Carbamidomethylation:1000.00
VTFVNFTVTR	25.92	1182.64	10	1.5	592.328	42.25	108000	1	13124	D113_BE.raw	1	1	Q14204
LSPQAVNSIAK	25.84	1126.63	11	0.4	564.325	30.5	121000	1	6928	D113_BE.raw	1	1	P30626
AGPTERGAQGSPAR(+14.02)	25.83	1367.69	14	1.1	456.905	24.75	14600	1	3950	D113_BE.raw	1	1	Q9UJ96	Methylation(R)	R14:Methylation(R):0.00
LAHYNKR	25.82	900.493	7	0.6	301.172	24.24	106000	1	3627	D113_BE.raw	1	1	Q99879:P62807:Q99877:Q99880:Q93079:Q5QNW6:P58876:O60814:Q16778:P23527:P33778:Q8N257:P06899
TIFMWYR	25.82	1015.49	7	1.2	508.755	45.33	306000	1	14530	D113_BE.raw	1	1	P80404
STAGDTHLGGEDFDNR	25.77	1690.72	16	-0.1	564.58	28.44	94000	1	5988	D113_BE.raw	1	1	P11142:P54652
TTQFSC(+57.02)TLGEKFEETTADGR	25.75	2277.02	20	0.4	760.015	37.53	24800	1	10623	D113_BE.raw	1	1	Q01469	Carbamidomethylation	C6:Carbamidomethylation:1000.00
M(+4.02)VPAGM(+4.02)GAGLER	25.74	1195.62	12	0.8	598.819	39.15	67100	1	11494	D113_BE.raw	1	1	P52272	13C(1) 2H(3) Silac label	M1:13C(1) 2H(3) Silac label:1000.00;M6:13C(1) 2H(3) Silac label:1000.00
GTSTYTTTASPFLEGTVSLAPK	25.53	2228.12	22	0.4	558.038	39.34	73700	1	11630	D113_BE.raw	1	1	E9PAV3
NLNHVSYGR	25.52	1058.53	9	1.1	530.271	24.8	0	1	4026	D113_BE.raw	0	0	P00367
RAPQITTPVK	25.49	1109.66	10	1.1	555.836	25.58	10600	1	4594	D113_BE.raw	1	1	Q16799
VC(+57.02)AYGPGLK	25.48	963.485	9	0.7	482.75	28.93	70700	1	6170	D113_BE.raw	1	1	Q14315	Carbamidomethylation	C2:Carbamidomethylation:1000.00
AGGLGGGSVPARARGAPAAAR	25.45	1818.99	21	0.7	607.338	51.67	49500	1	17437	D113_BE.raw	1	1	Q9P0K9
GLGR(+14.02)GGGGPEGGGFPNGAGPAER	25.43	2036.98	23	1.1	680	29.86	0	1	6609	D113_BE.raw	0	0	Q9H074	Methylation(R)	R4:Methylation(R):16.89
GAAPPPPPVPR(+14.02)	25.4	1068.61	11	0.8	535.312	29.58	51000	1	6473	D113_BE.raw	1	1	Q07666	Methylation(R)	R11:Methylation(R):1000.00
LEAENNLAAYRQEADEATLAR	25.39	2347.14	21	0.1	783.388	37.88	379000	1	10908	D113_BE.raw	1	1	P14136
GRGR(+14.02)GR(+14.02)PPSGGSGLGGDGGGC(+57.02)GGGGSGGGGAPRR(+14.02)	25.37	2935.4	34	-0.1	979.475	48.47	0	1	15881	D113_BE.raw	0	0	Q9UBB5	Methylation(R); Carbamidomethylation	R4:Methylation(R):0.00;R6:Methylation(R):5.55;C21:Carbamidomethylation:1000.00;R34:Methylation(R):7.65
SGGYGGDRSGGGYGGDR(+14.02)GGGYGGDR(+14.02)GGYGGK	25.36	2840.22	31	0.4	711.064	25.27	185000	1	4392	D113_BE.raw	1	1	Q92804	Methylation(R)	R17:Methylation(R):23.02;R25:Methylation(R):19.66
HAIVIC(+57.02)NR	25.32	981.518	8	1.5	491.767	24.88	6050	1	4081	D113_BE.raw	1	1	P53621	Carbamidomethylation	C6:Carbamidomethylation:1000.00
LGVHPLSC(+57.02)HGWVLGEHGDSSVPVWSGMNVAGVSLK	25.25	3667.8	35	0.2	734.568	46.71	0	1	15206	D113_BE.raw	0	0	P00338	Carbamidomethylation	C8:Carbamidomethylation:1000.00
IKIIAPPERK	25.19	1163.74	10	1.4	388.921	26.47	473000	1	5002	D113_BE.raw	2	2	P60709:P63261:P68032:P68133
ILALC(+57.02)MGNHELYMR	25.16	1719.83	14	2.8	574.284	41.09	178000	1	12467	D113_BE.raw	1	1		Carbamidomethylation	C5:Carbamidomethylation:1000.00
YPIQTPR	25.16	873.471	7	0.3	437.743	28.44	48200	1	5923	D113_BE.raw	1	1	Q96GW7
LKATVTPSPVK	25.16	1139.69	11	1.4	380.905	25.55	12100	1	4603	D113_BE.raw	1	1	Q9H1E3
EQVANSAFVER	25.13	1248.61	11	1.4	625.313	30.31	0	1	6857	D113_BE.raw	0	0	P08238
SAGGRPGSGPQLGTGR(+14.02)GTLR	25.11	1895.01	20	0	474.759	25.58	61900	1	4584	D113_BE.raw	1	1	O14908	Methylation(R)	R16:Methylation(R):14.54
VGLNAQAAC(+57.02)APR	25.08	1226.62	12	0.8	614.317	28.5	0	1	5968	D113_BE.raw	0	0	P48681	Carbamidomethylation	C9:Carbamidomethylation:1000.00
STPEYFAER	24.94	1098.5	9	-0.1	550.256	31.4	46200	1	7486	D113_BE.raw	1	1	P08133
SLYASSPGGVYATR(+14.02)SSAVR	24.88	1941.99	19	0.5	648.338	31.47	1350000	1	7510	D113_BE.raw	1	1	P08670	Methylation(R)	R14:Methylation(R):17.07
STTPDITGYR	24.88	1109.54	10	1.1	555.775	31.21	36400	1	7319	D113_BE.raw	1	1	P02751
LNGSITSPGWPK	24.87	1255.66	12	0.5	628.836	32.28	122000	1	7926	D113_BE.raw	1	1	P13497
MPGAPETAPGDGAGASR(+14.02)QR(+18.04)KLEALIR(+14.02)	24.69	2694.45	26	1.3	899.159	45.62	38800	1	14747	D113_BE.raw	1	1	O75116	Methylation(R); Methyl:2H(3)13C(1)	R17:Methylation(R):5.47;R19:Methyl:2H(3)13C(1):5.47;R26:Methylation(R):8.82
GPSVFPLAPSSK	24.62	1185.64	12	1.3	593.828	38.95	128000	1	11354	D113_BE.raw	1	1	P01857:P0DOX5
EVMSPTGSAR(+14.02)	24.61	1047.5	10	0.4	524.758	25.75	11600	1	4712	D113_BE.raw	1	1	O43347	Methylation(R)	R10:Methylation(R):1000.00
ITQSNAILR	24.58	1014.58	9	1.2	508.299	28.56	71100	1	5965	D113_BE.raw	1	1	P46439
RGKPASGAGAGAGAGKR(+14.02)	24.56	1481.82	17	0	494.946	26.53	0	1	5075	D113_BE.raw	0	0	O43818	Methylation(R)	R17:Methylation(R):11.57
HYQFASGAFLHIK	24.37	1517.78	13	0.6	506.933	37.55	108000	1	10630	D113_BE.raw	1	1	Q8WUM4
DAQHYGGWEHR	24.36	1354.58	11	0.3	452.534	25.22	10100	1	4401	D113_BE.raw	1	1	Q14697
SGRGTGR(+14.02)GGGGGGGGGAPR	24.35	1540.76	19	0.8	386.197	24.26	55800	1	3618	D113_BE.raw	1	1	Q07955	Methylation(R)	R7:Methylation(R):6.65
GGPMGR(+14.02)GGYGGGGSGGGGR(+14.02)	24.35	1577.71	19	1.1	789.864	25.51	0	1	4557	D113_BE.raw	0	0	P35637	Methylation(R)	R6:Methylation(R):1000.00;R19:Methylation(R):1000.00
MFGGPGTASRPSSSR	24.26	1493.7	15	-0.1	498.909	25.51	2690000	1	4516	D113_BE.raw	1	1	P08670
VTQSNFAVGYK	24.26	1212.61	11	-1.1	607.313	31.56	131000	1	7498	D113_BE.raw	1	1	P21796
LNKPFLFDTKPLIVQYEVNFQNGIEC(+57.02)GGAYVK	24.23	3700.9	32	-0.7	926.231	50.69	0	1	16875	D113_BE.raw	0	0	P27824	Carbamidomethylation	C26:Carbamidomethylation:1000.00
SSAAAGAPSR(+14.02)ASPGVPSERTR(+18.04)	24.15	2043.07	21	1.5	682.033	35.86	73000	1	9707	D113_BE.raw	1	1	Q14766	Methylation(R); Methyl:2H(3)13C(1)	R10:Methylation(R):0.00;R21:Methyl:2H(3)13C(1):0.00
RDVQQQIAQAQQGEGGLPDR(+14.02)GHEELR	24.13	2928.46	26	-0.2	977.159	45.53	0	1	14705	D113_BE.raw	0	0	Q8NF91	Methylation(R)	R20:Methylation(R):2.36
TPGPGAQSALR	24.12	1053.56	11	1	527.786	26	37400	1	4812	D113_BE.raw	1	1	P62263
HIVLSGGSTMYPGLPSR	24.07	1770.91	17	-0.8	591.31	37.6	82800	1	10613	D113_BE.raw	1	1	P61160
TTPSYVAFTDTERLIGDAAKNQVALNPQNTVFDAK	24.03	3794.91	35	-0.3	949.735	49.11	0	1	16139	D113_BE.raw	0	0	P0DMV9:P0DMV8
MAAPVVAPPGVVVSR(+18.04)	24.01	1466.86	15	0.1	734.435	52.01	181000	1	17669	D113_BE.raw	1	1	Q13144	Methyl:2H(3)13C(1)	R15:Methyl:2H(3)13C(1):1000.00
EAESC(+57.02)DC(+57.02)LQGFQLTHSLGGGTGSGMGTLLISK	24	3310.53	32	-0.3	1104.52	46.51	135000	1	15017	D113_BE.raw	1	1	P07437:P68371	Carbamidomethylation	C5:Carbamidomethylation:1000.00;C7:Carbamidomethylation:1000.00
EAESC(+57.02)DC(+57.02)LQGFQLTHSLGGGTGSGMGTLLLSK	24	3310.53	32	-0.3	1104.52	46.51	135000	1	15017	D113_BE.raw	1	1		Carbamidomethylation	C5:Carbamidomethylation:1000.00;C7:Carbamidomethylation:1000.00
ITPSYVAFTPEGER	23.98	1565.77	14	-1.2	783.893	39.55	31400	1	11635	D113_BE.raw	1	1	P11021
VANTSTQTMGPR(+14.02)PAAAAAAATPAVR(+14.02)	23.97	2408.26	25	0.3	803.761	30.92	27700	1	7132	D113_BE.raw	1	1	P11940	Methylation(R)	R12:Methylation(R):1000.00;R25:Methylation(R):1000.00
LAAAEETAVSPR(+14.02)K	23.95	1355.74	13	0.6	452.921	27.18	307000	1	5308	D113_BE.raw	1	1	Q9BUH6	Methylation(R)	R12:Methylation(R):1000.00
GFGFVLFK	23.88	913.506	8	0.8	457.761	48.5	347000	1	15892	D113_BE.raw	1	1	Q14103:O14979
DVQTGMSADNLQPK	23.88	1502.7	14	0.1	752.359	35.8	302000	1	9797	D113_BE.raw	1	1	Q8WUY3
DSPSVWAAVPGK	23.86	1212.61	12	1.9	607.315	40	0	1	11994	D113_BE.raw	0	0	P07737
EGGGRGAGDPGAPAVVPAPVSAPR(+18.04)PASSPAR(+14.02)SESR	23.84	3298.7	35	-0.4	1100.57	49.89	0	1	16497	D113_BE.raw	0	0	Q6ZS46	Methyl:2H(3)13C(1); Methylation(R)	R24:Methyl:2H(3)13C(1):0.00;R31:Methylation(R):0.00
VILHPTPNSPK	23.78	1201.68	11	1.3	401.568	25.36	6170	1	4525	D113_BE.raw	1	1	Q9ULU8
LGEEAAC(+57.02)RLPLDC(+57.02)GLALR	23.78	2013.01	18	0.6	672.012	43.75	84500	1	13897	D113_BE.raw	1	1	Q86VY4	Carbamidomethylation	C7:Carbamidomethylation:1000.00;C13:Carbamidomethylation:1000.00
SGGGYGGDR(+14.02)GGGYGGDR(+14.02)GGYGGK	23.75	2090.92	23	0.2	523.736	24.88	163000	1	4089	D113_BE.raw	1	1	Q92804	Methylation(R)	R9:Methylation(R):1000.00;R17:Methylation(R):1000.00
HYLFDVQR	23.73	1076.54	8	2.6	539.279	34.25	98800	1	8877	D113_BE.raw	1	1	P24539
SGR(+18.04)GGNFGFGDSR(+18.04)	23.69	1348.67	13	1.4	450.563	24.67	12100	1	3917	D113_BE.raw	1	1	P22626	Methyl:2H(3)13C(1)	R3:Methyl:2H(3)13C(1):1000.00;R13:Methyl:2H(3)13C(1):1000.00
NLQEAEEWYK	23.69	1308.6	10	0.3	655.307	37.49	224000	1	10670	D113_BE.raw	1	1	P08670
TFYSC(+57.02)TTEGR	23.66	1220.51	10	0.6	611.264	28.38	346000	1	5861	D113_BE.raw	1	1	P02751	Carbamidomethylation	C5:Carbamidomethylation:1000.00
TIPITREEKPAVTAAPK	23.58	1821.04	17	1.4	608.02	27.57	17500	1	5559	D113_BE.raw	1	1	P02511
AGDRVM(+4.02)VLNR(+14.02)	23.52	1147.64	10	0.6	574.828	32.3	102000	1	7913	D113_BE.raw	1	1	Q99536	13C(1) 2H(3) Silac label; Methylation(R)	M6:13C(1) 2H(3) Silac label:1000.00;R10:Methylation(R):9.27
GNRPVILTYHDIGMNHK	23.5	1964.01	17	1	492.009	32.4	218000	1	7935	D113_BE.raw	1	1	Q92597
NQGGYGGSSSSSSYGSGR(+14.02)R	23.49	1863.81	19	1	622.278	24.6	36500	1	3872	D113_BE.raw	1	1	P09651	Methylation(R)	R18:Methylation(R):8.69
NGPGMLVLTPTR	23.48	1254.68	12	0.6	628.345	37.24	304000	1	10446	D113_BE.raw	1	1	Q86TM3
FWEVISDEHGIDPTGSYHGDSDLQLER	23.47	3101.4	27	-1.3	776.356	43.3	101000	1	13705	D113_BE.raw	1	1	Q13885:Q9BVA1
ASVPDGFLSELTQQLAQATGKPPQYIAVHVVPDQLMAFGGSSEPC(+57.02)ALC(+57.02)SLHSIGK	23.46	5806.88	55	-1.2	1162.38	52.07	0	1	17697	D113_BE.raw	0	0	P14174	Carbamidomethylation	C45:Carbamidomethylation:1000.00;C48:Carbamidomethylation:1000.00
GLTSVINQK	23.45	958.545	9	-0.1	480.28	30.6	100000	1	6978	D113_BE.raw	1	1	P07195
GGNFGGGGGNFGR(+14.02)	23.38	1166.52	13	1.9	584.269	29.35	26300	1	6378	D113_BE.raw	1	1	P51991	Methylation(R)	R13:Methylation(R):1000.00
GVPEAQVAQTAGSGLAR	23.35	1610.84	17	1.5	537.954	29.48	63100	1	6479	D113_BE.raw	1	1	Q8IZY2
ASC(+57.02)LYGQLPK	23.35	1135.57	10	0	568.792	33.62	123000	1	8556	D113_BE.raw	1	1	P09211	Carbamidomethylation	C3:Carbamidomethylation:1000.00
HAEMVHTGLK	23.34	1121.57	10	1	374.863	24.7	50900	1	3948	D113_BE.raw	1	1	Q01518
EAVSMLVNC(+57.02)PAYYSVSAPKAELLNK	23.22	2753.38	25	-0.6	918.799	45.4	31800	1	14658	D113_BE.raw	1	1	Q8TF72	Carbamidomethylation	C9:Carbamidomethylation:1000.00
AGAGLSSLC(+57.02)LVLSTRPHS	23.21	1824.95	18	-0.6	609.324	42.55	144000	1	13280	D113_BE.raw	1	1	O95865	Carbamidomethylation	C9:Carbamidomethylation:1000.00
VPGLYYFTYHASSR	23.18	1659.8	14	0.8	554.276	40.39	44300	1	12255	D113_BE.raw	1	1	P02746
LVTDLTK	23.18	788.464	7	0.6	395.24	29.4	356000	1	6329	D113_BE.raw	1	1	P02768
YFPTQALNFAFK	23.17	1445.73	12	0	723.874	48.55	137000	1	15857	D113_BE.raw	1	1	P12235:P05141:P12236:Q9H0C2
HYC(+57.02)YPHFTC(+57.02)AVDTENIR	23.16	2181.94	17	1.9	728.321	35.22	40200	1	9384	D113_BE.raw	1	1	P38405	Carbamidomethylation	C3:Carbamidomethylation:1000.00;C9:Carbamidomethylation:1000.00
EAADR(+14.02)ADGAAPGVASR	23.07	1526.74	16	0.5	509.922	27.74	309000	1	5681	D113_BE.raw	1	1	Q8N3D4	Methylation(R)	R5:Methylation(R):10.20
EDMAALEK	23	905.416	8	0.5	453.716	28.69	46900	1	6029	D113_BE.raw	1	1	Q71U36:P68363:Q9BQE3
GSSASLVLKR	22.96	1016.6	10	0.2	509.306	25.75	13400	1	4676	D113_BE.raw	1	1	Q00325
QKQPEIGPASVMVGNLVSGK	22.95	2038.09	20	0	680.37	46.45	0	1	15081	D113_BE.raw	0	0	Q9Y2E4
HQIVEVAGDDKYGR	22.92	1585.78	14	0.4	529.602	26.69	7620	1	5134	D113_BE.raw	1	1	Q07960
EGR(+14.02)GMPPPLR	22.88	1122.6	10	-1.1	375.206	27.27	32300	1	5406	D113_BE.raw	1	1	Q01844	Methylation(R)	R3:Methylation(R):53.63
GRSISFPALLPIPGSNR	22.81	1780.99	17	-0.4	594.672	47.76	3970000	1	15552	D113_BE.raw	1	1	O60296
FHPRPNFR	22.72	1069.56	8	1.3	357.527	26	20000	1	4901	D113_BE.raw	1	1	Q14315
GGGGNFGPGPGSNFRGGSDGYGSGR	22.69	2269.98	25	-0.1	757.669	30.72	332000	1	7173	D113_BE.raw	1	1	P22626
SGRGTGR(+14.02)GGGGGGGGGAPR(+14.02)GR(+14.02)	22.62	1781.91	21	-0.6	446.485	24.44	340000	1	3661	D113_BE.raw	1	1	Q07955	Methylation(R)	R7:Methylation(R):0.00;R19:Methylation(R):0.65;R21:Methylation(R):0.00
IGNNSVSSLK	22.62	1017.55	10	0.8	509.78	37.68	318000	1	10561	D113_BE.raw	1	1	Q86YW9
RGILTLK	22.58	799.528	7	-0.2	400.771	29.32	2690000	1	6314	D113_BE.raw	1	1	P60709:P63261:P68032:P68133
FGQGGAGPVGGQGPR(+14.02)GMGPGTPAGYGR(+14.02)	22.51	2470.19	27	-0.8	824.404	33.16	0	1	8352	D113_BE.raw	0	0	P23246	Methylation(R)	R15:Methylation(R):1000.00;R27:Methylation(R):1000.00
GPPLDGR(+14.02)GGRDPRGIDAR	22.48	1874.98	18	0.9	469.753	25.7	1590000	1	4561	D113_BE.raw	1	1	P33240	Methylation(R)	R7:Methylation(R):5.08
ANNSTYGLAAAVFTK	22.44	1526.77	15	-0.7	764.393	42.24	0	1	13138	D113_BE.raw	0	0	P05091
KLFVGGIK	22.39	860.548	8	1	431.282	30.05	90500	1	6688	D113_BE.raw	1	1	P22626
KIFVGGIK	22.39	860.548	8	1	431.282	30.05	90500	1	6688	D113_BE.raw	1	1	P51991:P09651
KLFVGGLK	22.39	860.548	8	1	431.282	30.05	90500	1	6688	D113_BE.raw	1	1	Q13151
KTLDMIKK	22.37	975.579	8	-0.5	326.2	24.73	16300	1	3984	D113_BE.raw	1	1	P14625
VRGGVPLVK	22.35	923.592	9	1.3	462.804	26.09	31200	1	4875	D113_BE.raw	1	1	Q99613
VIPELNGK	22.35	868.502	8	0	435.258	30.53	84200	1	6935	D113_BE.raw	1	1	P04406
VAESC(+57.02)KPGAGLLLVETLLDEEK	22.29	2370.24	22	-0.3	791.085	51.72	0	1	17445	D113_BE.raw	0	0	O95671	Carbamidomethylation	C5:Carbamidomethylation:1000.00
VNAGTLAVLQR(+14.02)	22.25	1154.68	11	1.1	578.346	36.11	1490000	1	10063	D113_BE.raw	1	1	A3KMH1	Methylation(R)	R11:Methylation(R):1000.00
TPDTSTYC(+57.02)YETAEK	22.22	1664.69	14	1.5	833.352	29.98	0	1	6680	D113_BE.raw	0	0	P46821	Carbamidomethylation	C8:Carbamidomethylation:1000.00
TGTLTTNQMSVC(+57.02)R	22.2	1467.68	13	0	734.848	30.09	27500	1	6723	D113_BE.raw	1	1	P16615	Carbamidomethylation	C12:Carbamidomethylation:1000.00
SQVVAGTNYFIK	22.19	1325.7	12	0.5	663.857	37.77	103000	1	10678	D113_BE.raw	1	1	P04080
GEIGEPGQK	22.19	913.45	9	0.5	457.733	24.82	44100	1	4094	D113_BE.raw	1	1	P20908
HNIQALLK	22.15	935.555	8	0.3	468.785	29.15	77600	1	6256	D113_BE.raw	1	1	P10644
YAAELHLVHWNTK	22.05	1580.81	13	1.3	527.945	35.38	141000	1	9425	D113_BE.raw	1	1	P00918
ILQLC(+57.02)MGNHELYMR	22.05	1776.85	14	-0.1	593.29	40.53	26200	1	12270	D113_BE.raw	1	1	P15311	Carbamidomethylation	C5:Carbamidomethylation:1000.00
IVGGSAAGR	22.05	786.435	9	0.8	394.225	31.61	23400	1	7447	D113_BE.raw	1	1	Q7Z410
GDPGSSAAGIK	22.05	958.472	11	1.1	480.244	25.53	20100	1	4602	D113_BE.raw	1	1	Q9BXS0
AAGVPSATITWR	22.04	1228.66	12	-0.3	615.335	37.96	11000	1	10859	D113_BE.raw	1	1	P98160
HILANFK	21.96	841.481	7	1.1	421.748	28.53	207000	1	5937	D113_BE.raw	1	1	Q56UQ5
RPPSAFFLFC(+57.02)SEHRPK	21.94	1974.99	16	-0.6	494.754	37.73	106000	1	10937	D113_BE.raw	1	1		Carbamidomethylation	C10:Carbamidomethylation:1000.00
NALESYAFNMK	21.9	1286.6	11	0.8	644.306	40.58	80400	1	12321	D113_BE.raw	1	1	P0DMV9:P0DMV8:P34931
EDAAAR(+14.02)KPLTPKPK	21.88	1534.88	14	1.1	384.728	28.27	0	1	5870	D113_BE.raw	0	0	O14686	Methylation(R)	R6:Methylation(R):1000.00
GDLDIAGPNLEGDFK	21.85	1559.75	15	2.5	780.883	37.88	123000	1	10768	D113_BE.raw	1	1	Q09666
TLMNLGGLAVAR	21.85	1214.68	12	1.6	608.348	43.03	1000000	1	13752	D113_BE.raw	1	1	P37802
NPQPQPVDGVFVYPLAEAEVVSGFEAEAAGR(+14.02)R	21.82	3412.71	32	0.6	854.184	51.24	0	1	17155	D113_BE.raw	0	0	Q8N398	Methylation(R)	R31:Methylation(R):0.00
QLFHPEQLITGKEDAANNYAR	21.81	2414.2	21	0	604.557	37.45	79100	1	10429	D113_BE.raw	1	1	Q71U36:P68363:Q9BQE3:Q9NY65
TPLRPLDPTR	21.79	1164.66	10	0.1	389.228	25.52	242000	1	4559	D113_BE.raw	1	1	Q04637
MAAEAAGGK	21.78	804.38	9	1.2	403.198	28.59	3640000	1	5890	D113_BE.raw	1	1	Q96A65
LVINGNPITIFQER	21.75	1612.89	14	0.7	807.455	47.68	0	1	15589	D113_BE.raw	0	0	P04406
GIGVFSTGTGASGIQSLSR(+14.02)	21.72	1807.94	19	1.2	904.98	46.56	680000	1	14900	D113_BE.raw	1	1	Q53TQ3	Methylation(R)	R19:Methylation(R):1000.00
GIPGFAGADGGPGPRGLPGDAGR(+14.02)	21.72	2062.03	23	-0.9	1032.02	49.78	0	1	16452	D113_BE.raw	0	0	P08572	Methylation(R)	R23:Methylation(R):2.02
R(+14.02)LGLGAGPGARR(+14.02)C(+57.02)AR	21.71	1594.89	15	0.9	532.639	38.25	49600	1	10996	D113_BE.raw	1	1	Q8NG06	Methylation(R); Carbamidomethylation	R1:Methylation(R):16.78;R12:Methylation(R):0.00;C13:Carbamidomethylation:1000.00
TDLLLEPYNK	21.71	1204.63	10	1.6	603.325	39.85	28300	1	11965	D113_BE.raw	1	1	P35579
TYHVGEQWQK	21.68	1274.6	10	0.6	425.876	27.38	93600	1	5432	D113_BE.raw	1	1	P02751
TDKSSASAPDVDDPEAFPALA	21.65	2102.96	21	0.6	1052.49	44.25	34200	1	14092	D113_BE.raw	1	1	Q8NC51
NRSR(+18.04)AASGGAALASPGPGTGSGAPAGSGGKER(+14.02)	21.63	2840.45	32	1.4	711.121	34.97	0	1	9264	D113_BE.raw	0	0	Q5U651	Methyl:2H(3)13C(1); Methylation(R)	R4:Methyl:2H(3)13C(1):0.00;R32:Methylation(R):0.00
SVSDKQSAVTESSEGTVSLLR(+18.04)	21.62	2197.13	21	0.7	733.386	51.62	0	1	17377	D113_BE.raw	0	0	P54274	Methyl:2H(3)13C(1)	R21:Methyl:2H(3)13C(1):1000.00
FSAVALC(+57.02)K	21.61	894.463	8	0.9	448.239	32.31	156000	1	7888	D113_BE.raw	1	1	P09936	Carbamidomethylation	C7:Carbamidomethylation:1000.00
TFTAWC(+57.02)NSHLR	21.6	1391.64	11	1.4	464.888	32.77	157000	1	8141	D113_BE.raw	1	1	P12814	Carbamidomethylation	C6:Carbamidomethylation:1000.00
SKGGVVGIK	21.57	843.518	9	1.1	422.767	33.72	777000	1	8557	D113_BE.raw	1	1	P04075
R(+14.02)EGAGDAEADPLEPPPPQQQLGLSLR	21.55	2754.39	26	-1.8	919.137	50.97	0	1	17011	D113_BE.raw	0	0	Q9BTC0	Methylation(R)	R1:Methylation(R):7.26
YGTC(+57.02)IYQGR	21.52	1116.5	9	1.2	559.259	29.21	271000	1	6221	D113_BE.raw	1	1	P59666	Carbamidomethylation	C4:Carbamidomethylation:1000.00
VLGDVIEVHGK	21.49	1164.65	11	2.4	389.225	31.66	857000	1	7633	D113_BE.raw	1	1	P02511
SLTNDWEDHLAVK	21.46	1526.74	13	0.9	509.92	37.93	108000	1	10780	D113_BE.raw	1	1	P07900:P08238
SIYGEKFEDENFILK	21.46	1830.9	15	0.9	611.309	41.48	184000	1	12814	D113_BE.raw	1	1	P62937
HTQPAGPGR(+14.02)AQR	21.45	1288.67	12	1.7	430.566	24.67	169000	1	3911	D113_BE.raw	1	1	Q8NC74	Methylation(R)	R9:Methylation(R):10.22
DDPHAC(+57.02)YSTVFDK	21.41	1553.65	13	1.2	777.831	34.03	0	1	8775	D113_BE.raw	0	0		Carbamidomethylation	C6:Carbamidomethylation:1000.00
WPGAQVLWGLSDPVAYITLDPR(+14.02)	21.37	2467.29	22	-1	1234.65	51.83	47500	1	17536	D113_BE.raw	1	1	A2VEC9	Methylation(R)	R22:Methylation(R):1000.00
SPVEGLGR(+14.02)AHR	21.34	1191.65	11	0.8	398.223	24.74	143000	1	3972	D113_BE.raw	1	1	Q9Y5U2	Methylation(R)	R8:Methylation(R):29.32
SSPVGGGPR(+18.04)GPAGPALGR(+18.04)	21.33	1624.92	18	1	813.468	42.4	11200	1	13234	D113_BE.raw	1	1	Q00587	Methyl:2H(3)13C(1)	R9:Methyl:2H(3)13C(1):1000.00;R18:Methyl:2H(3)13C(1):1000.00
R(+14.02)SYVSSGEMMVGGLAPGRR	21.26	2023.01	19	-0.4	675.343	34.76	1040000	1	9103	D113_BE.raw	1	1	P14136	Methylation(R)	R1:Methylation(R):42.74
HLIVAIGVK	21.23	948.612	9	1	475.314	32.99	99400	1	8186	D113_BE.raw	1	1	Q2TBE0
LSQRFPK	21.2	874.502	7	0.8	438.259	24.77	31900	1	4023	D113_BE.raw	1	1	P02768
FYNQVSTPLLR	21.14	1336.71	11	1.2	669.365	39.63	63800	1	11767	D113_BE.raw	1	1	P19823
MGAGMGFGLER(+14.02)	21.08	1138.53	11	1.2	570.271	39.58	149000	1	11628	D113_BE.raw	1	1	P52272	Methylation(R)	R11:Methylation(R):1000.00
DEAR(+18.04)PGGAEAAPSR	21.08	1400.69	14	-1	701.352	30.38	0	1	6888	D113_BE.raw	0	0	Q8TAE7	Methyl:2H(3)13C(1)	R4:Methyl:2H(3)13C(1):29.98
RITSAAR(+14.02)R	21.08	943.567	8	-0.1	315.53	24.44	277000	1	3670	D113_BE.raw	1	1	P14136	Methylation(R)	R7:Methylation(R):17.01
FMTILC(+57.02)TR	21.05	1040.51	8	1.3	521.265	39.93	0	1	11967	D113_BE.raw	0	0	P08133	Carbamidomethylation	C6:Carbamidomethylation:1000.00
AGGLLGAGPDPR(+14.02)GGGPMGPGSGPNLR	20.97	2328.18	26	0.6	777.066	37.68	346000	1	10650	D113_BE.raw	1	1	P0CG12	Methylation(R)	R12:Methylation(R):20.81
GVPPPPTVR(+14.02)	20.95	932.544	9	1.3	467.28	28.52	51900	1	5966	D113_BE.raw	1	1	Q07666	Methylation(R)	R9:Methylation(R):1000.00
GYAFITFC(+57.02)GK	20.94	1162.55	10	2.2	582.283	42.75	108000	1	13333	D113_BE.raw	1	1	O43390	Carbamidomethylation	C8:Carbamidomethylation:1000.00
TEYLSNADER	20.93	1196.53	10	2	599.274	27.48	22900	1	5478	D113_BE.raw	1	1	Q14204
NGHLAVVAPR	20.9	1032.58	10	1.6	345.202	24.68	20600	1	3951	D113_BE.raw	1	1	O00159
SLGVPAGEASPGC(+57.02)TP	20.9	1398.64	15	0.1	700.33	42.57	0	1	13298	D113_BE.raw	0	0	Q9UBL6	Carbamidomethylation	C13:Carbamidomethylation:1000.00
IEEFLAQFQSLDETK	20.87	1796.88	15	0.9	899.45	51.04	0	1	17044	D113_BE.raw	0	0	Q9UBD5
VAAEPPDGPAR	20.84	1078.54	11	0.4	540.278	26.14	67100	1	4881	D113_BE.raw	1	1	Q9NYP3
ILSGNLPK	20.82	840.507	8	1.3	421.261	28.47	25800	1	6015	D113_BE.raw	1	1	Q5VIR6
SWEEAETQC(+57.02)R	20.78	1294.52	10	0.9	648.27	28.46	6050	1	5973	D113_BE.raw	1	1	Q96GW7	Carbamidomethylation	C9:Carbamidomethylation:1000.00
GPPLDGRGGR(+14.02)DPRGIDAR	20.78	1874.98	18	0.9	469.753	25.7	1590000	1	4771	D113_BE.raw	1	1	P33240	Methylation(R)	R10:Methylation(R):0.00
GTC(+57.02)HAVPDTPQILLAK	20.76	1719.9	16	0.5	574.307	46.32	0	1	15018	D113_BE.raw	0	0	P20929	Carbamidomethylation	C3:Carbamidomethylation:1000.00
LVRPEVDVMC(+57.02)TAFHDNEETFLKK	20.76	2777.35	23	1.4	556.478	40.61	38800	1	12364	D113_BE.raw	1	1	P02768	Carbamidomethylation	C10:Carbamidomethylation:1000.00
SGATAGAAGGR(+14.02)GKGAYQDRDKPAQIR	20.75	2572.32	26	0.3	644.088	24.82	146000	1	4027	D113_BE.raw	1	1	P50991	Methylation(R)	R11:Methylation(R):6.04
AAAAAAAVAVPLAGGQEGSPGGGR(+14.02)R	20.72	2175.15	25	1.5	726.059	44.46	0	1	14199	D113_BE.raw	0	0	Q92541	Methylation(R)	R24:Methylation(R):8.14
VLPGSNGKPNGQR	20.72	1322.71	13	-0.5	662.36	49.61	0	1	16362	D113_BE.raw	0	0	Q4ZHG4
TFTTQETITNAETAK	20.68	1654.8	15	-1.3	828.409	32.61	0	1	8055	D113_BE.raw	0	0	P06744
LLGGADLAQGNHSGAR(+14.02)	20.65	1549.8	16	1.6	775.907	50.48	275000	1	16746	D113_BE.raw	1	1	Q5W5X9	Methylation(R)	R16:Methylation(R):1000.00
MKETAEAYLGKK	20.62	1367.71	12	0.1	456.911	25.63	35800	1	4620	D113_BE.raw	1	1	P11021
APGFLQPPPLR(+14.02)QPR	20.56	1586.9	14	0.4	529.976	36.99	0	1	10296	D113_BE.raw	0	0	Q9H074	Methylation(R)	R11:Methylation(R):12.33
GLPGDR(+18.04)GPPGFR	20.55	1242.67	12	1.3	415.233	26.95	290000	1	5217	D113_BE.raw	1	1	P08572	Methyl:2H(3)13C(1)	R6:Methyl:2H(3)13C(1):15.57
YNGVFQEC(+57.02)C(+57.02)QAEDKGAC(+57.02)LLPK	20.53	2486.1	21	-0.2	829.708	37.97	131000	1	10990	D113_BE.raw	1	1		Carbamidomethylation	C8:Carbamidomethylation:1000.00;C9:Carbamidomethylation:1000.00;C17:Carbamidomethylation:1000.00
GGPPGPPISR	20.49	933.503	10	1	467.759	28.57	169000	1	5966	D113_BE.raw	1	1	Q04637
SVLVSAGNVK	20.45	972.56	10	0.9	487.288	28.8	10900	1	6109	D113_BE.raw	1	1	Q14204
IVYFILSR	20.4	1009.6	8	1.4	505.806	44.93	0	1	14412	D113_BE.raw	0	0	Q4KMQ2
AKNWAATSAGGSGANTR(+14.02)K	20.39	1760.89	18	1.6	587.972	30.54	62100	1	7040	D113_BE.raw	1	1	Q92502	Methylation(R)	R17:Methylation(R):1000.00
GAWSNVLR	20.37	901.477	8	1.2	451.746	36.16	95900	1	9872	D113_BE.raw	1	1	P12235:P05141:P12236
LQSIGTENTEENRR	20.23	1645.8	14	1.6	549.609	24.97	38600	1	4176	D113_BE.raw	1	1	P04075
QGIVHLDLKPENIMC(+57.02)VNK	20.17	2107.09	18	1.7	703.372	44.87	0	1	14384	D113_BE.raw	0	0	Q15746	Carbamidomethylation	C15:Carbamidomethylation:1000.00
NFDIGPK	20.14	789.402	7	0.4	395.709	31.74	52800	1	7447	D113_BE.raw	1	1	Q96P44
GVSSR(+14.02)SAAAGLGGGGSR(+18.04)	20.11	1477.79	17	1.3	739.902	40.02	349000	1	12203	D113_BE.raw	1	1	Q9BXB5	Methylation(R); Methyl:2H(3)13C(1)	R5:Methylation(R):0.00;R17:Methyl:2H(3)13C(1):0.00
RVTIMPK	20.08	843.5	7	0.1	422.757	25.54	1810000	1	4538	D113_BE.raw	1	1	Q6NXT2:P68431:P84243:Q71DI3:Q16695
VNIIPVIGK	20.07	951.612	9	0.2	476.813	37.77	41400	1	10733	D113_BE.raw	1	1	Q8WYJ6
TPQTVAGYTIPPGHQVC(+57.02)VSPTVNQR(+14.02)	20.01	2720.37	25	0.3	907.798	44.51	0	1	14214	D113_BE.raw	0	0	Q16850	Carbamidomethylation; Methylation(R)	C17:Carbamidomethylation:1000.00;R25:Methylation(R):1000.00
KLVINSGNGAVEDR	20.01	1470.78	14	-2.6	736.395	44.97	49100	1	14426	D113_BE.raw	1	1	P16070
TLSGGIQVNGPR	19.98	1197.65	12	1.6	599.832	30.99	0	1	7204	D113_BE.raw	0	0	P32455
GR(+14.02)GYFEHR	19.97	1034.5	8	-0.7	345.842	24.58	92600	1	3847	D113_BE.raw	1	1	Q9BUJ2	Methylation(R)	R2:Methylation(R):69.64
C(+57.02)SGPGLGAGVR	19.95	1029.5	11	0.2	515.759	27.18	18100	1	5372	D113_BE.raw	1	1	Q14315	Carbamidomethylation	C1:Carbamidomethylation:1000.00
R(+14.02)SSPSARPPDVPGQQPQAAK	19.94	2087.09	20	0.3	696.703	44.97	25000	1	14450	D113_BE.raw	1	1	Q96JP5	Methylation(R)	R1:Methylation(R):0.00
DSYSSSSR(+14.02)GAPRGAGPGGSR	19.91	1921.9	20	-0.1	641.64	24.58	15100	1	3863	D113_BE.raw	1	1		Methylation(R)	R8:Methylation(R):0.00
RRPQPYPYPSK	19.89	1387.74	11	1.2	463.587	25.16	86800	1	4296	D113_BE.raw	1	1	Q9H3N1
ESYSIYVYK	19.87	1150.55	9	1.9	576.286	37.2	399000	1	10494	D113_BE.raw	1	1	Q16778:P23527:P33778:Q8N257:P06899
GGPPGPPISR(+14.02)GLPLVDDGGWNTVPISK	19.87	2696.43	27	0.9	899.818	45.38	54000	1	14669	D113_BE.raw	1	1	Q04637	Methylation(R)	R10:Methylation(R):1000.00
FTVETR(+18.04)GAGTGGLGLAVEGPSEAK	19.85	2321.21	24	1.2	774.746	51.6	0	1	17364	D113_BE.raw	0	0	P21333	Methyl:2H(3)13C(1)	R6:Methyl:2H(3)13C(1):1000.00
GVLFGVPGAFTPGC(+57.02)SK	19.75	1592.8	16	1.4	797.409	46.29	0	1	15009	D113_BE.raw	0	0	P30044	Carbamidomethylation	C14:Carbamidomethylation:1000.00
VIQYLAHVASSHK	19.7	1451.79	13	1.2	484.937	29.65	48500	1	6553	D113_BE.raw	1	1	P35580
