# Supplementary material for: Investigating the effects of arginine methylation inhibitors on microdissected brain tumour biopsies maintained in a miniaturised perfusion system
Source: Royal Society of Chemistry journal article supplement (doi:10.1039/d3lc00204g), 2023-01-01
Supplement: d3lc00204g11.xlsx [file d3lc00204g11.xlsx]

## Sheet: Supplementary Tables Plenary
Gene Ontology (GO) analysis (ShinyGO (Ge SX, Jung D & Yao R, Bioinformatics 36:2628–2629, 2020; http://bioinformatics.sdstate.edu/go/)) of significantly (p<0.05) differentially expressed genes (DEGs) (FC >1.5/<-1.5), common to 2 or more patients, in RNA-seq analysis of 4 patient GBM samples, 8-days post-perfusion and treated with 1 µM GSK3368715 vs DMSO control.
Related to Figure 5
Related to Supplementary Figures 4 and 5
1: Upregulated DEGs Biological Process
2: Upregulated DEGs Cellular Component
3: Upregulated DEGs Molecular Function
4: Upregulated DEGs KEGG
5: Downregulated DEGs Biological Process
6: Downregulated DEGs Cellular Component
7: Downregulated DEGs Molecular Function
8: Downregulated DEGs KEGG

## Sheet: 1 Upreg Biological Process
Gene Ontology showing enrichment of biological processes of upregulated differentially expressed genes (DEGs) common to 2 or more patients after 8-day in the perfusion device, treated with 1 µM GSK3368715 vs the DMSO control
Enrichment FDR	nGenes	Pathway Genes	Fold Enrichment	Pathway	URL	Genes
1.2385e-09	66	699	2.65402	Chemotaxis	http://amigo.geneontology.org/amigo/term/GO:0006935	ANOS1 HGF ADGRA2 TRIO NTN1 SPI1 EDN1 SEMA5B PIK3CG HOXA2 CXCL12 CCL7 CCL2 CCL8 BST1 BIN2 VEGFA LOX FGF1 CSF3R CCRL2 EGR2 PREX1 LBP DOCK2 PLXNC1 EDNRB GPNMB CH25H FGF2 LYST GDF7 ACKR3 SLIT2 PIK3R1 CXCL14 PLA2G7 PTPRO KIF5A CXCL13 SLAMF8 FCER1G CCR5 CCR1 VEGFD MAPK7 GBX2 GFRA2 CXCL8 GPR183 S1PR1 FPR1 C3AR1 SCG2 GAP43 PTPRM CDK5R1 ADAMTSL1 CSF1R FPR3 EVL C5AR1 DPP4 PLXNB3 SUCNR1 TUBB3
1.2385e-09	116	1639	1.98938	Cell adhesion	http://amigo.geneontology.org/amigo/term/GO:0007155	PKD1 CD4 ANOS1 CNTN1 SLAMF7 IBSP VCAN VMP1 NTN1 CD84 SPI1 FCGR2B APBB1IP FAP PCDHB4 CD200 CORO2B APLP1 CD33 CADM4 PIK3CG ECM2 CXCL12 MAP3K8 CCL2 ALOX12 BST1 LPXN CD83 VEGFA CDH6 CD86 ITGA4 LOXL3 PLEK RND3 GBP1 CNN3 CSF3R PCDHB8 PCDHB10 PCDHB14 SASH3 TNFAIP6 PREX1 FGL2 LIF POSTN DUSP26 ADAMDEC1 PTPN22 APC HAVCR2 CD36 SERPINE2 STAB2 PLXNC1 PCDH8 GPNMB SMAD6 CYP1B1 ITGB7 CDH11 TMEFF2 ACKR3 NFKBIZ PI…
1.2385e-09	116	1646	1.98092	Biological adhesion	http://amigo.geneontology.org/amigo/term/GO:0022610	PKD1 CD4 ANOS1 CNTN1 SLAMF7 IBSP VCAN VMP1 NTN1 CD84 SPI1 FCGR2B APBB1IP FAP PCDHB4 CD200 CORO2B APLP1 CD33 CADM4 PIK3CG ECM2 CXCL12 MAP3K8 CCL2 ALOX12 BST1 LPXN CD83 VEGFA CDH6 CD86 ITGA4 LOXL3 PLEK RND3 GBP1 CNN3 CSF3R PCDHB8 PCDHB10 PCDHB14 SASH3 TNFAIP6 PREX1 FGL2 LIF POSTN DUSP26 ADAMDEC1 PTPN22 APC HAVCR2 CD36 SERPINE2 STAB2 PLXNC1 PCDH8 GPNMB SMAD6 CYP1B1 ITGB7 CDH11 TMEFF2 ACKR3 NFKBIZ PI…
1.2385e-09	66	702	2.64268	Taxis	http://amigo.geneontology.org/amigo/term/GO:0042330	ANOS1 HGF ADGRA2 TRIO NTN1 SPI1 EDN1 SEMA5B PIK3CG HOXA2 CXCL12 CCL7 CCL2 CCL8 BST1 BIN2 VEGFA LOX FGF1 CSF3R CCRL2 EGR2 PREX1 LBP DOCK2 PLXNC1 EDNRB GPNMB CH25H FGF2 LYST GDF7 ACKR3 SLIT2 PIK3R1 CXCL14 PLA2G7 PTPRO KIF5A CXCL13 SLAMF8 FCER1G CCR5 CCR1 VEGFD MAPK7 GBX2 GFRA2 CXCL8 GPR183 S1PR1 FPR1 C3AR1 SCG2 GAP43 PTPRM CDK5R1 ADAMTSL1 CSF1R FPR3 EVL C5AR1 DPP4 PLXNB3 SUCNR1 TUBB3
2.64545e-09	131	1982	1.85783	Locomotion	http://amigo.geneontology.org/amigo/term/GO:0040011	FGR SOX8 ANOS1 DCN HGF ADGRA2 TRIO VCAN NTN1 CD84 SPI1 CAMK2A FAP EDN1 SEMA5B CD200 HMOX1 BEX4 CADM4 PIK3CG HOXA2 CXCL12 CCL7 CCL2 CCL8 ALOX12 BST1 LPXN BIN2 SOD2 PHACTR1 NR2E1 VEGFA LOX SPARC FGF1 ITGA4 APC2 RND3 MARK1 GADD45A CD48 CSF3R CCRL2 EGR2 TNFAIP6 PREX1 SNAI1 LBP PLVAP RGN AKAP12 POSTN PTPN22 DOCK2 APC DOCK10 HTR2B SERPINE2 PLXNC1 SPRY2 EDNRB GPNMB CYP1B1 CH25H FGF2 ITGB7 NLRP12 LYST GD…
1.24549e-08	41	343	3.35991	Cell chemotaxis	http://amigo.geneontology.org/amigo/term/GO:0060326	HGF SPI1 EDN1 PIK3CG CXCL12 CCL7 CCL2 CCL8 BST1 BIN2 VEGFA LOX FGF1 CSF3R CCRL2 PREX1 LBP EDNRB CH25H FGF2 LYST ACKR3 SLIT2 CXCL14 PLA2G7 PTPRO CXCL13 SLAMF8 FCER1G CCR5 CCR1 VEGFD CXCL8 GPR183 S1PR1 C3AR1 SCG2 CSF1R C5AR1 DPP4 PLXNB3
4.53042e-08	108	1590	1.90926	Cell migration	http://amigo.geneontology.org/amigo/term/GO:0016477	FGR SOX8 DCN HGF ADGRA2 VCAN NTN1 CD84 SPI1 CAMK2A FAP EDN1 SEMA5B CD200 HMOX1 BEX4 PIK3CG CXCL12 CCL7 CCL2 CCL8 ALOX12 BST1 LPXN BIN2 SOD2 PHACTR1 NR2E1 VEGFA LOX SPARC FGF1 ITGA4 APC2 RND3 MARK1 GADD45A CD48 CSF3R CCRL2 TNFAIP6 PREX1 SNAI1 LBP PLVAP AKAP12 POSTN PTPN22 APC DOCK10 HTR2B SERPINE2 PLXNC1 SPRY2 EDNRB GPNMB CYP1B1 CH25H FGF2 ITGB7 NLRP12 LYST TMEFF2 ACKR3 SLIT2 PIK3R1 MEGF10 CXCL14 …
4.61857e-08	81	1056	2.15605	Regulation of locomotion	http://amigo.geneontology.org/amigo/term/GO:0040012	FGR DCN HGF ADGRA2 NTN1 SPI1 CAMK2A EDN1 SEMA5B CD200 HMOX1 BEX4 CADM4 PIK3CG CXCL12 CCL7 CCL2 CCL8 ALOX12 BST1 SOD2 PHACTR1 NR2E1 VEGFA SPARC FGF1 ITGA4 GADD45A TNFAIP6 PREX1 SNAI1 LBP PLVAP RGN AKAP12 POSTN PTPN22 APC DOCK10 SERPINE2 PLXNC1 SPRY2 GPNMB CYP1B1 FGF2 TMEFF2 ACKR3 SLIT2 PIK3R1 CXCL14 PLA2G7 ADRA2A PTPRO DAB2 CXCL13 SLAMF8 PLPP3 CCR1 VEGFD MAPRE2 COL3A1 CXCL8 GPR183 LDB2 S1PR1 C3AR1…
4.88659e-08	75	946	2.22848	Regulation of cell migration	http://amigo.geneontology.org/amigo/term/GO:0030334	FGR DCN HGF ADGRA2 NTN1 SPI1 CAMK2A EDN1 SEMA5B CD200 HMOX1 BEX4 PIK3CG CXCL12 CCL7 CCL2 CCL8 ALOX12 BST1 SOD2 PHACTR1 NR2E1 VEGFA SPARC FGF1 ITGA4 GADD45A TNFAIP6 PREX1 SNAI1 LBP PLVAP AKAP12 POSTN PTPN22 APC DOCK10 SERPINE2 PLXNC1 SPRY2 GPNMB CYP1B1 FGF2 TMEFF2 ACKR3 SLIT2 PIK3R1 CXCL14 PLA2G7 ADRA2A DAB2 CXCL13 SLAMF8 PLPP3 CCR1 VEGFD MAPRE2 COL3A1 CXCL8 GPR183 LDB2 S1PR1 C3AR1 FRMD5 CLEC7A PT…
1.29837e-07	33	258	3.59527	Leukocyte chemotaxis	http://amigo.geneontology.org/amigo/term/GO:0030595	SPI1 EDN1 PIK3CG CXCL12 CCL7 CCL2 CCL8 BST1 VEGFA CSF3R PREX1 LBP EDNRB CH25H LYST SLIT2 CXCL14 PLA2G7 PTPRO CXCL13 SLAMF8 FCER1G CCR5 CCR1 VEGFD CXCL8 GPR183 S1PR1 C3AR1 SCG2 CSF1R C5AR1 DPP4
1.37536e-07	77	1010	2.14293	Regulation of cell motility	http://amigo.geneontology.org/amigo/term/GO:2000145	FGR DCN HGF ADGRA2 NTN1 SPI1 CAMK2A EDN1 SEMA5B CD200 HMOX1 BEX4 CADM4 PIK3CG CXCL12 CCL7 CCL2 CCL8 ALOX12 BST1 SOD2 PHACTR1 NR2E1 VEGFA SPARC FGF1 ITGA4 GADD45A TNFAIP6 PREX1 SNAI1 LBP PLVAP RGN AKAP12 POSTN PTPN22 APC DOCK10 SERPINE2 PLXNC1 SPRY2 GPNMB CYP1B1 FGF2 TMEFF2 ACKR3 SLIT2 PIK3R1 CXCL14 PLA2G7 ADRA2A DAB2 CXCL13 SLAMF8 PLPP3 CCR1 VEGFD MAPRE2 COL3A1 CXCL8 GPR183 LDB2 S1PR1 C3AR1 FRMD5…
2.03337e-07	114	1776	1.80426	Cell motility	http://amigo.geneontology.org/amigo/term/GO:0048870	FGR SOX8 DCN HGF ADGRA2 VCAN NTN1 CD84 SPI1 CAMK2A FAP EDN1 SEMA5B CD200 HMOX1 BEX4 CADM4 PIK3CG CXCL12 CCL7 CCL2 CCL8 ALOX12 BST1 LPXN BIN2 SOD2 PHACTR1 NR2E1 VEGFA LOX SPARC FGF1 ITGA4 APC2 RND3 MARK1 GADD45A CD48 CSF3R CCRL2 TNFAIP6 PREX1 SNAI1 LBP PLVAP RGN AKAP12 POSTN PTPN22 APC DOCK10 HTR2B SERPINE2 PLXNC1 SPRY2 EDNRB GPNMB CYP1B1 CH25H FGF2 ITGB7 NLRP12 LYST TMEFF2 ACKR3 SLIT2 PIK3R1 MEGF…
2.03337e-07	114	1776	1.80426	Localization of cell	http://amigo.geneontology.org/amigo/term/GO:0051674	FGR SOX8 DCN HGF ADGRA2 VCAN NTN1 CD84 SPI1 CAMK2A FAP EDN1 SEMA5B CD200 HMOX1 BEX4 CADM4 PIK3CG CXCL12 CCL7 CCL2 CCL8 ALOX12 BST1 LPXN BIN2 SOD2 PHACTR1 NR2E1 VEGFA LOX SPARC FGF1 ITGA4 APC2 RND3 MARK1 GADD45A CD48 CSF3R CCRL2 TNFAIP6 PREX1 SNAI1 LBP PLVAP RGN AKAP12 POSTN PTPN22 APC DOCK10 HTR2B SERPINE2 PLXNC1 SPRY2 EDNRB GPNMB CYP1B1 CH25H FGF2 ITGB7 NLRP12 LYST TMEFF2 ACKR3 SLIT2 PIK3R1 MEGF…
7.06805e-07	79	1092	2.03349	Regulation of cellular component movement	http://amigo.geneontology.org/amigo/term/GO:0051270	FGR DCN HGF ADGRA2 NTN1 SPI1 CAMK2A EDN1 SEMA5B CD200 HMOX1 BEX4 CADM4 PIK3CG CXCL12 CCL7 CCL2 CCL8 ALOX12 BST1 SOD2 PHACTR1 NR2E1 VEGFA SPARC FGF1 ITGA4 GADD45A TNFAIP6 PREX1 SNAI1 LBP PLVAP RGN AKAP12 POSTN PTPN22 APC DOCK10 SERPINE2 PLXNC1 SPRY2 GPNMB CYP1B1 FGF2 TMEFF2 ACKR3 SLIT2 PIK3R1 CXCL14 PLA2G7 ADRA2A PTPRO DAB2 CXCL13 SLAMF8 PLPP3 CCR1 VEGFD MAPRE2 COL3A1 CXCL8 GPR183 LDB2 S1PR1 C3AR1…
2.50495e-06	54	646	2.34963	Regulation of MAPK cascade	http://amigo.geneontology.org/amigo/term/GO:0043408	CD4 HGF SPI1 FCGR2B EDN1 MT3 P2RX7 PIK3CG CDK5RAP3 CCL7 CCL2 CCL8 VEGFA FGF1 GADD45A GBP1 MMP8 RAMP3 LIF AKAP12 EDA2R CHI3L1 DUSP26 PTPN22 HAVCR2 CD36 GPR55 HTR2B SPRY2 GPNMB TLR4 FGF2 PELI2 PIK3R5 NLRP12 ACKR3 FGD2 ADRA2A FZD7 NEK10 CCR1 GRIK2 DACT1 NPNT GPR183 CLEC7A CHRNA9 NPPA SOX2 CSF1R C1QL4 ZDHHC17 C5AR1 LBH
3.40075e-06	29	239	3.41066	Regulation of chemotaxis	http://amigo.geneontology.org/amigo/term/GO:0050920	ADGRA2 SPI1 EDN1 SEMA5B CXCL12 CCL7 CCL2 BST1 VEGFA FGF1 LBP FGF2 SLIT2 CXCL14 PLA2G7 PTPRO CXCL13 SLAMF8 CCR1 VEGFD CXCL8 GPR183 S1PR1 C3AR1 SCG2 CSF1R C5AR1 DPP4 SUCNR1
5.31013e-06	45	502	2.51969	Leukocyte migration	http://amigo.geneontology.org/amigo/term/GO:0050900	CD84 SPI1 EDN1 CD200 HMOX1 PIK3CG CXCL12 CCL7 CCL2 CCL8 BST1 VEGFA ITGA4 CD48 CSF3R PREX1 LBP PLVAP PTPN22 EDNRB CH25H ITGB7 NLRP12 LYST SLIT2 PIK3R1 CXCL14 PLA2G7 PTPRO MERTK CXCL13 SLAMF8 FCER1G CCR5 CCR1 VEGFD CXCL8 GPR183 S1PR1 C3AR1 SCG2 CSF1R APOD C5AR1 DPP4
8.61103e-06	85	1286	1.85787	Cation transport	http://amigo.geneontology.org/amigo/term/GO:0006812	PKD1 CD4 CNTN1 CP VMP1 CD84 ABCC9 CAMK2A ASIC4 EDN1 ADCYAP1R1 LRP2 MT3 P2RX7 CAPN3 KCND1 CD33 CACNG7 PIK3CG KCNT1 CXCL12 CCL2 CCL8 P2RX3 HPX KCNQ4 RGS4 KCNIP2 GRIA2 RAMP3 RGN SYT6 PTPN22 APLNR HTR2B SERPINE2 FXYD6 SLC5A6 SLC40A1 FGF2 SLC15A4 STAC2 SYT2 UNC80 ATP6V1B2 ATP6V0D2 ADRA2A KCNE4 TMEM163 KCNK13 SLC25A27 SLC24A2 MICU3 STEAP2 RNF207 KCNB1 CHRNB2 CCR5 CTSS SLC15A2 CCR1 GRM2 SLC13A4 GEM TMC1…
8.73564e-06	68	944	2.02477	MAPK cascade	http://amigo.geneontology.org/amigo/term/GO:0000165	CD4 HGF SPI1 CAMK2A FCGR2B EDN1 MT3 P2RX7 CSF2RB PIK3CG MAP3K8 CDK5RAP3 CCL7 CCL2 CCL8 VEGFA FGF1 GADD45A GBP1 MMP8 RAMP3 LIF ARHGEF6 PLVAP AKAP12 EDA2R CHI3L1 DUSP26 PTPN22 HAVCR2 CD36 GPR55 HTR2B SPRY2 GPNMB TLR4 FGF2 PELI2 PIK3R5 NLRP12 RGL1 ACKR3 PIK3R1 FGD2 ADRA2A RASGRP3 FZD7 CCR5 NEK10 CCR1 GRIK2 DACT1 MAPK7 GFRA2 NPNT GPR183 SCG2 CLEC7A CHRNA9 NPPA SOX2 CSF1R C1QL4 ZDHHC17 C5AR1 LBH SULT1…
8.73564e-06	70	984	1.99959	Metal ion transport	http://amigo.geneontology.org/amigo/term/GO:0030001	PKD1 CD4 CNTN1 CP VMP1 CD84 ABCC9 CAMK2A ASIC4 ADCYAP1R1 LRP2 MT3 P2RX7 CAPN3 KCND1 CD33 CACNG7 PIK3CG KCNT1 CXCL12 CCL2 CCL8 P2RX3 HPX KCNQ4 RGS4 KCNIP2 RAMP3 RGN PTPN22 APLNR HTR2B SERPINE2 FXYD6 SLC5A6 SLC40A1 FGF2 STAC2 ATP6V1B2 ATP6V0D2 ADRA2A KCNE4 TMEM163 KCNK13 SLC24A2 MICU3 STEAP2 RNF207 KCNB1 CHRNB2 CCR5 CCR1 SLC13A4 GEM TMC1 BEST1 FTH1 KCNAB3 SLN ATP6V0E2 GLRX CHRNA9 NPPA KCNE3 KCNA2 K…
1.61811e-05	49	597	2.30706	Positive regulation of locomotion	http://amigo.geneontology.org/amigo/term/GO:0040017	FGR HGF ADGRA2 NTN1 SPI1 EDN1 SEMA5B HMOX1 PIK3CG CXCL12 CCL7 CCL8 ALOX12 SOD2 VEGFA SPARC FGF1 ITGA4 TNFAIP6 PREX1 SNAI1 LBP PLVAP AKAP12 POSTN APC SPRY2 GPNMB FGF2 ACKR3 SLIT2 PIK3R1 CXCL14 PLA2G7 ADRA2A DAB2 CXCL13 PLPP3 CCR1 VEGFD MAPRE2 CXCL8 S1PR1 C3AR1 SCG2 CLEC7A CSF1R C5AR1 SUCNR1
1.66072e-05	91	1438	1.77877	Regulation of multicellular organismal development	http://amigo.geneontology.org/amigo/term/GO:2000026	SOX8 SCIN CD4 DCN HGF ADGRA2 KMT2C NTN1 SPI1 FCGR2B GPR137B EDN1 LRP2 SEMA5B MT3 P2RX7 CAPN3 HMOX1 CXCL12 ASPA NKX3-2 MGP CD83 NR2E1 VEGFA LOX SPARC FGF1 CD86 KAT2B LOXL3 DLX2 GADD45A RGS4 CSF3R ACVR2A SASH3 EGR2 FGL2 LIF RGN CHI3L1 SOX5 APLNR GPR55 SERPINE2 PLXNC1 SPRY2 GPNMB TLR4 IRF4 CYP1B1 RBP4 FGF2 PROK1 CTSK NFKBIZ TCTA SLIT2 PIK3R1 TTBK1 TMEM178A CXCL13 SLAMF8 C1QC PKDCC DISC1 FRZB CCR1 VE…
1.67132e-05	74	1085	1.91708	Cell morphogenesis	http://amigo.geneontology.org/amigo/term/GO:0000902	FGR SARM1 GAS7 ANOS1 HGF TRIO MYO16 NTN1 SPI1 ARHGAP15 LRP2 EPB41L3 SEMA5B MT3 CACNG7 HOXA2 CXCL12 CCL7 CCL2 LPXN PHACTR1 NR2E1 VEGFA SPARC CDH6 ITGA4 RND3 GBP1 EGR2 PREX1 UNC13A CASP9 POSTN KIDINS220 DOCK10 PLXNC1 ITGB7 CDH11 SYT2 GDF7 TMEFF2 SLIT2 PIK3R1 FGD2 CDHR1 PTPRO MERTK FZD7 KIF5A FMNL2 CHRNB2 DISC1 DCHS1 MAPK7 GBX2 GFRA2 SHOX2 CTNND2 NPTX1 GAP43 PTPRM PEAK1 CDK5R1 ADAMTSL1 RGMA CSF1R SL…
1.70273e-05	20	135	4.16422	Regulation of leukocyte chemotaxis	http://amigo.geneontology.org/amigo/term/GO:0002688	SPI1 EDN1 CXCL12 CCL7 CCL2 BST1 VEGFA LBP SLIT2 CXCL14 PLA2G7 CXCL13 SLAMF8 CCR1 VEGFD CXCL8 C3AR1 CSF1R C5AR1 DPP4
1.88544e-05	75	1111	1.89751	Negative regulation of multicellular organismal process	http://amigo.geneontology.org/amigo/term/GO:0051241	SOX8 DCN HGF NTN1 CD84 SPI1 FCGR2B GPR137B FAP EDN1 SEMA5B MT3 P2RX7 CD200 HMOX1 TLR8 CD33 PIK3CG ALOX12 NKX3-2 CD83 NR2E1 SPARC LOXL3 IL1R2 DLX2 PLCL1 GADD45A RGS4 GBP1 MMP8 FGL2 LBP RGN CHRM3 PTPN22 HAVCR2 GPR55 SERPINE2 SPRY2 GPNMB TLR4 SMAD6 RBP4 FGF2 NLRP12 CTSK TCTA SLIT2 PIK3R1 PTPRO TMEM178A MERTK ABI3BP VSIG4 FZD7 CXCL13 SLAMF8 C1QC FRZB CCR1 TNFRSF11B ALDH1A1 FBN1 COL4A3 APLN PTPRM NPPA…
2.05632e-05	74	1094	1.90131	Tube development	http://amigo.geneontology.org/amigo/term/GO:0035295	SOX8 PKD1 DCN HGF ADGRA2 NTN1 SPI1 FAP EDN1 LRP2 HMOX1 PIK3CG CCL2 ALOX12 NKX3-2 NR2E1 VEGFA LOX SPARC FGF1 LOXL3 GADD45A HSD11B1 GORAB RDH10 RAMP3 LIF HOXD11 CHI3L1 APLNR SERPINE2 STAB2 SPRY2 EDNRB GPNMB SMAD6 CYP1B1 RBP4 FGF2 PROK1 GDF7 ACKR3 SLIT2 CXCL13 RNF207 SIM2 PKDCC BBS5 ESM1 VEGFD DACT1 SALL2 DCHS1 MAPK7 GBX2 NPNT SHOX2 COL4A3 CXCL8 S1PR1 APLN COL8A2 C3AR1 SCG2 PTPRM JUN AQP11 RGMA CSF1…
2.22581e-05	41	465	2.47838	Positive regulation of MAPK cascade	http://amigo.geneontology.org/amigo/term/GO:0043410	CD4 SPI1 FCGR2B EDN1 MT3 PIK3CG CCL7 CCL2 CCL8 VEGFA FGF1 GADD45A MMP8 RAMP3 LIF AKAP12 EDA2R CHI3L1 PTPN22 HAVCR2 CD36 GPR55 HTR2B SPRY2 GPNMB TLR4 FGF2 PELI2 PIK3R5 ACKR3 FGD2 ADRA2A FZD7 NEK10 CCR1 NPNT GPR183 CLEC7A SOX2 CSF1R C5AR1
2.22581e-05	42	482	2.44929	Calcium ion homeostasis	http://amigo.geneontology.org/amigo/term/GO:0055074	PKD1 EDN1 ADCYAP1R1 SNX10 P2RX7 CAPN3 PIK3CG CXCL12 CCL7 CCL8 P2RX3 CCRL2 RAMP3 RGN APLNR CD36 GPR55 HTR2B EDNRB FGF2 LPAR6 GPR65 SYPL2 ACKR3 TMEM178A SLC25A27 SLC24A2 MICU3 CXCL13 CCR5 DISC1 CCR1 GRIK2 S1PR1 FPR1 C3AR1 CHRNA9 FPR3 CLN3 C5AR1 LIME1 GSTM2
2.2259e-05	54	704	2.15605	Cellular cation homeostasis	http://amigo.geneontology.org/amigo/term/GO:0030003	PKD1 CP EDN1 ADCYAP1R1 MT3 P2RX7 CAPN3 HMOX1 PIK3CG CXCL12 CCL7 CCL8 P2RX3 HPX CCRL2 RAMP3 RGN APLNR CD36 GPR55 HTR2B EDNRB SLC40A1 FGF2 LPAR6 GPR65 SYPL2 ACKR3 ATP6V1B2 ATP6V0D2 TMEM178A SLC25A27 SLC24A2 MICU3 CXCL13 STEAP2 SLAMF8 CCR5 DISC1 CCR1 GRIK2 FTH1 S1PR1 FPR1 ATP6V0E2 C3AR1 CHRNA9 AQP11 FPR3 CLN3 C5AR1 LIME1 GSTM2 KCTD7
2.2259e-05	61	839	2.04365	Ion homeostasis	http://amigo.geneontology.org/amigo/term/GO:0050801	PDK4 PKD1 DCN CP EDN1 ADCYAP1R1 SNX10 MT3 P2RX7 CAPN3 HMOX1 PIK3CG CXCL12 CCL7 CCL8 ALOX12 P2RX3 HPX CCRL2 RAMP3 RGN APLNR CD36 GPR55 HTR2B EDNRB SLC40A1 FGF2 LPAR6 GPR65 SYPL2 UNC80 ACKR3 ATP6V1B2 ATP6V0D2 TMEM178A SLC25A27 SLC24A2 MICU3 CXCL13 STEAP2 SLAMF8 CCR5 DISC1 CCR1 GRM2 GRIK2 FTH1 S1PR1 FPR1 ATP6V0E2 C3AR1 CHRNA9 AQP11 FPR3 CLN3 C5AR1 LIME1 MLLT11 GSTM2 KCTD7
2.24811e-05	27	238	3.18878	Regulation of leukocyte migration	http://amigo.geneontology.org/amigo/term/GO:0002685	SPI1 EDN1 CD200 HMOX1 CXCL12 CCL7 CCL2 CCL8 BST1 VEGFA ITGA4 LBP PLVAP PTPN22 SLIT2 CXCL14 PLA2G7 CXCL13 SLAMF8 CCR1 VEGFD CXCL8 C3AR1 CSF1R APOD C5AR1 DPP4
2.24811e-05	28	253	3.11082	Myeloid leukocyte migration	http://amigo.geneontology.org/amigo/term/GO:0097529	SPI1 EDN1 CD200 PIK3CG CXCL12 CCL7 CCL2 CCL8 BST1 VEGFA CSF3R PREX1 LBP EDNRB SLIT2 PLA2G7 PTPRO CXCL13 SLAMF8 FCER1G CCR1 VEGFD CXCL8 C3AR1 SCG2 CSF1R C5AR1 DPP4
2.52262e-05	41	470	2.45202	Cellular calcium ion homeostasis	http://amigo.geneontology.org/amigo/term/GO:0006874	PKD1 EDN1 ADCYAP1R1 P2RX7 CAPN3 PIK3CG CXCL12 CCL7 CCL8 P2RX3 CCRL2 RAMP3 RGN APLNR CD36 GPR55 HTR2B EDNRB FGF2 LPAR6 GPR65 SYPL2 ACKR3 TMEM178A SLC25A27 SLC24A2 MICU3 CXCL13 CCR5 DISC1 CCR1 GRIK2 S1PR1 FPR1 C3AR1 CHRNA9 FPR3 CLN3 C5AR1 LIME1 GSTM2
2.60349e-05	49	616	2.2359	Cellular metal ion homeostasis	http://amigo.geneontology.org/amigo/term/GO:0006875	PKD1 CP EDN1 ADCYAP1R1 MT3 P2RX7 CAPN3 HMOX1 PIK3CG CXCL12 CCL7 CCL8 P2RX3 HPX CCRL2 RAMP3 RGN APLNR CD36 GPR55 HTR2B EDNRB SLC40A1 FGF2 LPAR6 GPR65 SYPL2 ACKR3 TMEM178A SLC25A27 SLC24A2 MICU3 CXCL13 STEAP2 CCR5 DISC1 CCR1 GRIK2 FTH1 S1PR1 FPR1 C3AR1 CHRNA9 FPR3 CLN3 C5AR1 LIME1 GSTM2 KCTD7
3.55795e-05	102	1720	1.6669	Ion transport	http://amigo.geneontology.org/amigo/term/GO:0006811	PKD1 CD4 CNTN1 CP MPC1 VMP1 CD84 ABCC9 CAMK2A ASIC4 ANO8 EDN1 ADCYAP1R1 LRP2 NCOA1 MT3 P2RX7 CAPN3 MLC1 KCND1 CLCN7 AQP9 CD33 CACNG7 PIK3CG KCNT1 CXCL12 CCL2 CCL8 GLRB P2RX3 HPX KCNQ4 RGS4 KCNIP2 GRIA2 RAMP3 RGN CHRM3 SYT6 PTPN22 APLNR CD36 HTR2B SERPINE2 FXYD6 SLC5A6 SLC40A1 FGF2 SLC15A4 STAC2 SYT2 UNC80 SLC26A1 ATP6V1B2 ATP6V0D2 GRIK4 ADRA2A KCNE4 TMEM163 KCNK13 SLC25A27 SLC24A2 MICU3 STEAP2 RN…
3.55795e-05	54	719	2.11107	Cellular ion homeostasis	http://amigo.geneontology.org/amigo/term/GO:0006873	PKD1 CP EDN1 ADCYAP1R1 MT3 P2RX7 CAPN3 HMOX1 PIK3CG CXCL12 CCL7 CCL8 P2RX3 HPX CCRL2 RAMP3 RGN APLNR CD36 GPR55 HTR2B EDNRB SLC40A1 FGF2 LPAR6 GPR65 SYPL2 ACKR3 ATP6V1B2 ATP6V0D2 TMEM178A SLC25A27 SLC24A2 MICU3 CXCL13 STEAP2 SLAMF8 CCR5 DISC1 CCR1 GRIK2 FTH1 S1PR1 FPR1 ATP6V0E2 C3AR1 CHRNA9 AQP11 FPR3 CLN3 C5AR1 LIME1 GSTM2 KCTD7
3.55795e-05	110	1896	1.63077	Regulation of intracellular signal transduction	http://amigo.geneontology.org/amigo/term/GO:1902531	FGR CD4 DCN HGF FAM13B TRIO SPI1 PPP2R5B FCGR2B ARHGAP15 GPR137B EDN1 ADCYAP1R1 LRP2 MT3 P2RX7 CAPN3 HMOX1 CADM4 PIK3CG CXCL12 CDK5RAP3 CCL7 CCL2 CCL8 BST1 P2RX3 SOD2 VEGFA FGF1 CD86 PLEK GADD45A GBP1 MMP8 RAMP3 PREX1 SNAI1 LIF ARHGEF6 STARD8 RGN AKAP12 EDA2R CHI3L1 DUSP26 PTPN22 APLNR HAVCR2 CD36 GPR55 HTR2B SERPINE2 SPRY2 GPNMB RALGPS1 TLR4 ARHGAP20 FGF2 SLC15A4 LPAR6 PELI2 GPR65 PIK3R5 NLRP12 …
3.8589e-05	107	1835	1.63902	Positive regulation of cell communication	http://amigo.geneontology.org/amigo/term/GO:0010647	FGR CD4 DCN HGF ADGRA2 SPI1 PPP2R5B FCGR2B GPR137B EDN1 ADCYAP1R1 LRP2 MT3 STX1B HMOX1 CACNG7 PIK3CG CDK5RAP3 CCL7 CCL2 CCL8 P2RX3 HPX NR2E1 VEGFA GHR FGF1 CD86 KAT2B LOXL3 GADD45A RGS4 MMP8 GORAB ACVR2A RWDD3 RAMP3 LIF TMOD2 KLK14 LBP AKAP12 EDA2R CHI3L1 CD180 PTPN22 HAVCR2 CD36 GPR55 HTR2B SERPINE2 SPRY2 GPNMB TLR4 CYP1B1 RBP4 FGF2 SLC15A4 LPAR6 PELI2 GPR65 PIK3R5 NLRP12 GDF7 ACKR3 PIK3R1 FGD2 …
3.97853e-05	57	781	2.05145	Cation homeostasis	http://amigo.geneontology.org/amigo/term/GO:0055080	PDK4 PKD1 CP EDN1 ADCYAP1R1 SNX10 MT3 P2RX7 CAPN3 HMOX1 PIK3CG CXCL12 CCL7 CCL8 P2RX3 HPX CCRL2 RAMP3 RGN APLNR CD36 GPR55 HTR2B EDNRB SLC40A1 FGF2 LPAR6 GPR65 SYPL2 UNC80 ACKR3 ATP6V1B2 ATP6V0D2 TMEM178A SLC25A27 SLC24A2 MICU3 CXCL13 STEAP2 SLAMF8 CCR5 DISC1 CCR1 GRIK2 FTH1 S1PR1 FPR1 ATP6V0E2 C3AR1 CHRNA9 AQP11 FPR3 CLN3 C5AR1 LIME1 GSTM2 KCTD7
4.16317e-05	52	686	2.13067	Neuron projection morphogenesis	http://amigo.geneontology.org/amigo/term/GO:0048812	SARM1 GAS7 ANOS1 TRIO MYO16 NTN1 LRP2 EPB41L3 SEMA5B MT3 CACNG7 HOXA2 CXCL12 PHACTR1 NR2E1 VEGFA ITGA4 EGR2 UNC13A POSTN KIDINS220 DOCK10 PLXNC1 CDH11 SYT2 GDF7 SLIT2 PIK3R1 PTPRO KIF5A CHRNB2 DISC1 MAPK7 GBX2 GFRA2 SHOX2 CTNND2 NPTX1 GAP43 PTPRM CDK5R1 ADAMTSL1 RGMA CSF1R SLITRK2 ZDHHC17 EVL KIF13B ATL1 PLXNB3 TUBB3 NEFL
4.19968e-05	107	1842	1.6328	Positive regulation of signaling	http://amigo.geneontology.org/amigo/term/GO:0023056	FGR CD4 DCN HGF ADGRA2 SPI1 PPP2R5B FCGR2B GPR137B EDN1 ADCYAP1R1 LRP2 MT3 STX1B HMOX1 CACNG7 PIK3CG CDK5RAP3 CCL7 CCL2 CCL8 P2RX3 HPX NR2E1 VEGFA GHR FGF1 CD86 KAT2B LOXL3 GADD45A RGS4 MMP8 GORAB ACVR2A RWDD3 RAMP3 LIF TMOD2 KLK14 LBP AKAP12 EDA2R CHI3L1 CD180 PTPN22 HAVCR2 CD36 GPR55 HTR2B SERPINE2 SPRY2 GPNMB TLR4 CYP1B1 RBP4 FGF2 SLC15A4 LPAR6 PELI2 GPR65 PIK3R5 NLRP12 GDF7 ACKR3 PIK3R1 FGD2 …
4.19968e-05	45	556	2.27497	Positive regulation of cell migration	http://amigo.geneontology.org/amigo/term/GO:0030335	FGR HGF ADGRA2 SPI1 EDN1 SEMA5B HMOX1 PIK3CG CXCL12 CCL7 CCL8 ALOX12 SOD2 VEGFA SPARC FGF1 ITGA4 TNFAIP6 PREX1 SNAI1 LBP PLVAP AKAP12 POSTN APC SPRY2 GPNMB FGF2 ACKR3 PIK3R1 CXCL14 PLA2G7 ADRA2A DAB2 CXCL13 PLPP3 CCR1 VEGFD MAPRE2 CXCL8 S1PR1 C3AR1 CLEC7A CSF1R C5AR1
4.19968e-05	110	1911	1.61797	Homeostatic process	http://amigo.geneontology.org/amigo/term/GO:0042592	PDK4 PKD1 DCN NCDN GRAMD1B CP SPI1 GPR137B EDN1 ADCYAP1R1 SNX10 CETP MT3 P2RX7 LYZ CAPN3 HMOX1 AQP9 PIK3CG CXCL12 CDK5RAP3 CCL7 CCL2 CCL8 ALOX12 P2RX3 HPX SOD2 VEGFA LOX PLCL1 NCF2 CCRL2 ACVR2A SASH3 RAMP3 ARMCX1 ORMDL1 RGN APLNR APC CD36 GPR55 DOCK10 HTR2B EDNRB TLR4 IRF4 RBP4 SLC40A1 FGF2 SLC15A4 LPAR6 GPR65 SYPL2 CTSK UNC80 ACKR3 PIK3R1 ATP6V1B2 ATP6V0D2 CDHR1 ADRA2A TMEM178A MERTK SLC25A27 SL…
4.19968e-05	32	329	2.73396	Regulation of ERK1 and ERK2 cascade	http://amigo.geneontology.org/amigo/term/GO:0070372	CD4 MT3 CCL7 CCL2 CCL8 VEGFA GBP1 RAMP3 LIF AKAP12 CHI3L1 DUSP26 PTPN22 HAVCR2 CD36 GPR55 HTR2B SPRY2 GPNMB TLR4 FGF2 NLRP12 ACKR3 NEK10 CCR1 NPNT GPR183 CHRNA9 CSF1R C1QL4 ZDHHC17 C5AR1
5.03816e-05	65	950	1.92321	Inflammatory response	http://amigo.geneontology.org/amigo/term/GO:0006954	FGR HGF FCGR2B ADCYAP1R1 LYZ CD200 HMOX1 TLR8 PIK3CG CCL7 CCL2 CCL8 BST1 LOXL3 IL1R2 MMP8 CCRL2 RAMP3 TNFAIP6 CDO1 LBP CHI3L1 CD180 TSPAN2 DAGLA HAVCR2 CD36 EDNRB TLR4 NLRP12 FCGR2A NFKBIZ PLA2G7 TTBK1 ABI3BP GBP5 CXCL13 SLAMF8 CCR5 PTX3 CCR1 FOLR2 MAPK7 GPRC5B CXCL8 GPR27 FPR1 C3AR1 SCG2 CLEC7A NRROS TLR1 CHST2 NPPA CD163 CSF1R SOCS3 FPR3 APOD TLR7 C5AR1 SUCNR1 ACKR1 TRIL ADORA3
5.19759e-05	33	350	2.65023	ERK1 and ERK2 cascade	http://amigo.geneontology.org/amigo/term/GO:0070371	CD4 MT3 CCL7 CCL2 CCL8 VEGFA GBP1 RAMP3 LIF AKAP12 CHI3L1 DUSP26 PTPN22 HAVCR2 CD36 GPR55 HTR2B SPRY2 GPNMB TLR4 FGF2 NLRP12 ACKR3 NEK10 CCR1 NPNT GPR183 CHRNA9 CSF1R C1QL4 ZDHHC17 C5AR1 SULT1A3
5.19759e-05	46	581	2.22546	Positive regulation of cell motility	http://amigo.geneontology.org/amigo/term/GO:2000147	FGR HGF ADGRA2 NTN1 SPI1 EDN1 SEMA5B HMOX1 PIK3CG CXCL12 CCL7 CCL8 ALOX12 SOD2 VEGFA SPARC FGF1 ITGA4 TNFAIP6 PREX1 SNAI1 LBP PLVAP AKAP12 POSTN APC SPRY2 GPNMB FGF2 ACKR3 PIK3R1 CXCL14 PLA2G7 ADRA2A DAB2 CXCL13 PLPP3 CCR1 VEGFD MAPRE2 CXCL8 S1PR1 C3AR1 CLEC7A CSF1R C5AR1
5.68676e-05	56	775	2.03107	Cell morphogenesis involved in differentiation	http://amigo.geneontology.org/amigo/term/GO:0000904	SARM1 ANOS1 TRIO NTN1 SPI1 SEMA5B MT3 HOXA2 CXCL12 LPXN PHACTR1 NR2E1 VEGFA ITGA4 GBP1 EGR2 PREX1 CASP9 POSTN KIDINS220 DOCK10 PLXNC1 ITGB7 CDH11 GDF7 TMEFF2 SLIT2 PIK3R1 CDHR1 PTPRO MERTK FZD7 KIF5A CHRNB2 DISC1 MAPK7 GBX2 GFRA2 SHOX2 CTNND2 NPTX1 GAP43 PTPRM PEAK1 CDK5R1 ADAMTSL1 RGMA CSF1R SLITRK2 ZDHHC17 EVL KIF13B ATL1 PLXNB3 TUBB3 NEFL
6.18411e-05	42	512	2.30578	Cellular divalent inorganic cation homeostasis	http://amigo.geneontology.org/amigo/term/GO:0072503	PKD1 EDN1 ADCYAP1R1 MT3 P2RX7 CAPN3 PIK3CG CXCL12 CCL7 CCL8 P2RX3 CCRL2 RAMP3 RGN APLNR CD36 GPR55 HTR2B EDNRB FGF2 LPAR6 GPR65 SYPL2 ACKR3 TMEM178A SLC25A27 SLC24A2 MICU3 CXCL13 CCR5 DISC1 CCR1 GRIK2 S1PR1 FPR1 C3AR1 CHRNA9 FPR3 CLN3 C5AR1 LIME1 GSTM2
6.18411e-05	52	700	2.08806	Plasma membrane bounded cell projection morphogenesis	http://amigo.geneontology.org/amigo/term/GO:0120039	SARM1 GAS7 ANOS1 TRIO MYO16 NTN1 LRP2 EPB41L3 SEMA5B MT3 CACNG7 HOXA2 CXCL12 PHACTR1 NR2E1 VEGFA ITGA4 EGR2 UNC13A POSTN KIDINS220 DOCK10 PLXNC1 CDH11 SYT2 GDF7 SLIT2 PIK3R1 PTPRO KIF5A CHRNB2 DISC1 MAPK7 GBX2 GFRA2 SHOX2 CTNND2 NPTX1 GAP43 PTPRM CDK5R1 ADAMTSL1 RGMA CSF1R SLITRK2 ZDHHC17 EVL KIF13B ATL1 PLXNB3 TUBB3 NEFL
6.28461e-05	43	531	2.27621	Divalent inorganic cation homeostasis	http://amigo.geneontology.org/amigo/term/GO:0072507	PKD1 EDN1 ADCYAP1R1 SNX10 MT3 P2RX7 CAPN3 PIK3CG CXCL12 CCL7 CCL8 P2RX3 CCRL2 RAMP3 RGN APLNR CD36 GPR55 HTR2B EDNRB FGF2 LPAR6 GPR65 SYPL2 ACKR3 TMEM178A SLC25A27 SLC24A2 MICU3 CXCL13 CCR5 DISC1 CCR1 GRIK2 S1PR1 FPR1 C3AR1 CHRNA9 FPR3 CLN3 C5AR1 LIME1 GSTM2
6.53685e-05	97	1644	1.65847	Positive regulation of signal transduction	http://amigo.geneontology.org/amigo/term/GO:0009967	FGR CD4 DCN HGF ADGRA2 SPI1 PPP2R5B FCGR2B GPR137B EDN1 ADCYAP1R1 LRP2 MT3 STX1B HMOX1 PIK3CG CDK5RAP3 CCL7 CCL2 CCL8 P2RX3 HPX VEGFA GHR FGF1 CD86 KAT2B LOXL3 GADD45A RGS4 MMP8 GORAB ACVR2A RWDD3 RAMP3 LIF TMOD2 KLK14 LBP AKAP12 EDA2R CHI3L1 CD180 PTPN22 HAVCR2 CD36 GPR55 HTR2B SPRY2 GPNMB TLR4 CYP1B1 FGF2 SLC15A4 LPAR6 PELI2 GPR65 PIK3R5 NLRP12 GDF7 ACKR3 PIK3R1 FGD2 ADRA2A NR3C2 DAB2 LURAP1L F…
6.55645e-05	102	1757	1.6318	Neurogenesis	http://amigo.geneontology.org/amigo/term/GO:0022008	SARM1 SOX8 GAS7 ANOS1 CNTN1 HGF NCDN TRIO VCAN MYO16 PRDM6 NTN1 PPP2R5B CAMK2A ACTL6B LRP2 EPB41L3 SEMA5B NCOA1 MT3 STX1B CACNG7 HOXA2 CXCL12 ASPA CDK5RAP3 CCL2 PHACTR1 NR2E1 VEGFA ITGA4 DLX2 MARK1 KCNIP2 EGR2 PREX1 LIF UNC13A POSTN CAMK1 TSPAN2 KIDINS220 SOX5 DAGLA DOCK10 SERPINE2 PLXNC1 EDNRB TLR4 FGF2 RTN1 CDH11 SYT2 GDF7 SLIT2 PIK3R1 TTBK1 NLGN4X CDHR1 PTPRO FZD7 KIF5A FZD1 CHRNB2 DISC1 KLF15…
6.55645e-05	52	704	2.0762	Cell projection morphogenesis	http://amigo.geneontology.org/amigo/term/GO:0048858	SARM1 GAS7 ANOS1 TRIO MYO16 NTN1 LRP2 EPB41L3 SEMA5B MT3 CACNG7 HOXA2 CXCL12 PHACTR1 NR2E1 VEGFA ITGA4 EGR2 UNC13A POSTN KIDINS220 DOCK10 PLXNC1 CDH11 SYT2 GDF7 SLIT2 PIK3R1 PTPRO KIF5A CHRNB2 DISC1 MAPK7 GBX2 GFRA2 SHOX2 CTNND2 NPTX1 GAP43 PTPRM CDK5R1 ADAMTSL1 RGMA CSF1R SLITRK2 ZDHHC17 EVL KIF13B ATL1 PLXNB3 TUBB3 NEFL
6.55645e-05	20	154	3.65046	Positive regulation of chemotaxis	http://amigo.geneontology.org/amigo/term/GO:0050921	SPI1 EDN1 CXCL12 CCL7 VEGFA LBP FGF2 SLIT2 CXCL14 PLA2G7 CXCL13 CCR1 VEGFD CXCL8 S1PR1 C3AR1 SCG2 CSF1R C5AR1 SUCNR1
6.55645e-05	19	140	3.81473	Granulocyte chemotaxis	http://amigo.geneontology.org/amigo/term/GO:0071621	EDN1 PIK3CG CCL7 CCL2 CCL8 BST1 VEGFA CSF3R PREX1 LBP SLIT2 CXCL13 FCER1G CXCL8 C3AR1 SCG2 CSF1R C5AR1 DPP4
6.83875e-05	101	1738	1.63346	Regulation of cell differentiation	http://amigo.geneontology.org/amigo/term/GO:0045595	SOX8 SCIN CD4 HGF ADGRA2 TRIO KMT2C PRDM6 NTN1 SPI1 FCGR2B GPR137B EDN1 LRP2 SEMA5B NCOA1 CETP MT3 CAPN3 OLFM2 HOXA2 CXCL12 ASPA CDK5RAP3 NKX3-2 SOD2 CD83 NR2E1 VEGFA GHR LOX CD86 KAT2B APC2 LOXL3 DLX2 RGS4 GBP1 CSF3R ACVR2A SASH3 EGR2 PREX1 SNAI1 FGL2 LIF POSTN CAMK1 SOX5 APC CD36 LMO2 GPR55 SERPINE2 PLXNC1 SPRY2 EDNRB TLR4 IRF4 SMAD6 FGF2 CTSK GDF7 NFKBIZ TCTA SLIT2 PIK3R1 MEGF10 CXCL14 TTBK1 T…
7.07721e-05	68	1028	1.85932	Positive regulation of intracellular signal transduction	http://amigo.geneontology.org/amigo/term/GO:1902533	FGR CD4 DCN HGF SPI1 FCGR2B GPR137B EDN1 ADCYAP1R1 LRP2 MT3 HMOX1 PIK3CG CDK5RAP3 CCL7 CCL2 CCL8 P2RX3 VEGFA FGF1 CD86 GADD45A MMP8 RAMP3 LIF AKAP12 EDA2R CHI3L1 PTPN22 HAVCR2 CD36 GPR55 HTR2B SPRY2 GPNMB TLR4 FGF2 SLC15A4 LPAR6 PELI2 GPR65 PIK3R5 NLRP12 ACKR3 PIK3R1 FGD2 ADRA2A NR3C2 LURAP1L FZD7 NPR2 NEK10 CCR1 MAPRE2 GPRC5B COL3A1 NPNT GPR183 CLEC7A NPPA C18orf32 TSPYL5 SOX2 CSF1R TRIM52 ZDHHC…
8.06202e-05	46	595	2.17309	Positive regulation of cellular component movement	http://amigo.geneontology.org/amigo/term/GO:0051272	FGR HGF ADGRA2 NTN1 SPI1 EDN1 SEMA5B HMOX1 PIK3CG CXCL12 CCL7 CCL8 ALOX12 SOD2 VEGFA SPARC FGF1 ITGA4 TNFAIP6 PREX1 SNAI1 LBP PLVAP AKAP12 POSTN APC SPRY2 GPNMB FGF2 ACKR3 PIK3R1 CXCL14 PLA2G7 ADRA2A DAB2 CXCL13 PLPP3 CCR1 VEGFD MAPRE2 CXCL8 S1PR1 C3AR1 CLEC7A CSF1R C5AR1
8.88405e-05	28	279	2.82093	Regulation of calcium ion transport	http://amigo.geneontology.org/amigo/term/GO:0051924	CD4 VMP1 CD84 CAMK2A ADCYAP1R1 P2RX7 CAPN3 CD33 PIK3CG CXCL12 CCL2 P2RX3 RGS4 RAMP3 RGN PTPN22 APLNR STAC2 ADRA2A CCR1 GEM TMC1 BEST1 SLN NPPA KCNE3 LIME1 GSTM2
9.2397e-05	56	793	1.98496	Inorganic ion homeostasis	http://amigo.geneontology.org/amigo/term/GO:0098771	PDK4 PKD1 CP EDN1 ADCYAP1R1 SNX10 MT3 P2RX7 CAPN3 HMOX1 PIK3CG CXCL12 CCL7 CCL8 P2RX3 HPX CCRL2 RAMP3 RGN APLNR CD36 GPR55 HTR2B EDNRB SLC40A1 FGF2 LPAR6 GPR65 SYPL2 ACKR3 ATP6V1B2 ATP6V0D2 TMEM178A SLC25A27 SLC24A2 MICU3 CXCL13 STEAP2 SLAMF8 CCR5 DISC1 CCR1 GRIK2 FTH1 S1PR1 FPR1 ATP6V0E2 C3AR1 CHRNA9 AQP11 FPR3 CLN3 C5AR1 LIME1 GSTM2 KCTD7
9.96271e-05	78	1251	1.75257	Ion transmembrane transport	http://amigo.geneontology.org/amigo/term/GO:0034220	PKD1 MPC1 VMP1 ABCC9 CAMK2A ASIC4 ANO8 LRP2 P2RX7 CAPN3 KCND1 CLCN7 CACNG7 PIK3CG KCNT1 CCL2 GLRB P2RX3 KCNQ4 RGS4 KCNIP2 GRIA2 RAMP3 RGN CHRM3 PTPN22 APLNR HTR2B FXYD6 SLC5A6 SLC40A1 FGF2 SLC15A4 STAC2 UNC80 SLC26A1 ATP6V1B2 ATP6V0D2 GRIK4 ADRA2A KCNE4 TMEM163 KCNK13 SLC25A27 SLC24A2 MICU3 STEAP2 RNF207 KCNB1 CHRNB2 CCR5 CTSS SLC15A2 GRIK2 SLC13A4 GEM TMC1 FOLR2 BEST1 KCNAB3 SLN ATP6V0E2 GLRX CH…
0.000102203	65	979	1.86624	Cellular homeostasis	http://amigo.geneontology.org/amigo/term/GO:0019725	PKD1 CP EDN1 ADCYAP1R1 MT3 P2RX7 CAPN3 HMOX1 PIK3CG CXCL12 CCL7 CCL2 CCL8 P2RX3 HPX LOX NCF2 CCRL2 RAMP3 ORMDL1 RGN APLNR CD36 GPR55 HTR2B EDNRB SLC40A1 FGF2 LPAR6 GPR65 SYPL2 ACKR3 PIK3R1 ATP6V1B2 ATP6V0D2 ADRA2A TMEM178A SLC25A27 SLC24A2 MICU3 CXCL13 STEAP2 KCNB1 SLAMF8 CCR5 DISC1 CCR1 KLF15 GRIK2 FTH1 GPR27 S1PR1 FPR1 ATP6V0E2 C3AR1 CHRNA9 AQP11 NELL2 FPR3 CLN3 C5AR1 LIME1 GSTM2 KCTD7 EGLN2
0.000102793	58	837	1.94778	Regulation of cell adhesion	http://amigo.geneontology.org/amigo/term/GO:0030155	PKD1 CD4 IBSP SPI1 FCGR2B APBB1IP CORO2B PIK3CG ECM2 CXCL12 MAP3K8 CCL2 ALOX12 BST1 LPXN CD83 VEGFA CD86 ITGA4 LOXL3 GBP1 SASH3 PREX1 FGL2 LIF POSTN DUSP26 ADAMDEC1 PTPN22 HAVCR2 CD36 SERPINE2 PLXNC1 PCDH8 GPNMB CYP1B1 NFKBIZ PIK3R1 MEGF10 PTPRO ABI3BP VSIG4 FZD7 CXCL13 PLPP3 DISC1 MAPK7 NPNT CXCL8 S1PR1 FRMD5 PEAK1 SOX2 ABAT APOD DPP4 PLXNB3 MMP12
0.000115231	52	721	2.02724	Cell part morphogenesis	http://amigo.geneontology.org/amigo/term/GO:0032990	SARM1 GAS7 ANOS1 TRIO MYO16 NTN1 LRP2 EPB41L3 SEMA5B MT3 CACNG7 HOXA2 CXCL12 PHACTR1 NR2E1 VEGFA ITGA4 EGR2 UNC13A POSTN KIDINS220 DOCK10 PLXNC1 CDH11 SYT2 GDF7 SLIT2 PIK3R1 PTPRO KIF5A CHRNB2 DISC1 MAPK7 GBX2 GFRA2 SHOX2 CTNND2 NPTX1 GAP43 PTPRM CDK5R1 ADAMTSL1 RGMA CSF1R SLITRK2 ZDHHC17 EVL KIF13B ATL1 PLXNB3 TUBB3 NEFL
0.000118186	60	882	1.91214	Cellular chemical homeostasis	http://amigo.geneontology.org/amigo/term/GO:0055082	PKD1 CP EDN1 ADCYAP1R1 MT3 P2RX7 CAPN3 HMOX1 PIK3CG CXCL12 CCL7 CCL8 P2RX3 HPX CCRL2 RAMP3 ORMDL1 RGN APLNR CD36 GPR55 HTR2B EDNRB SLC40A1 FGF2 LPAR6 GPR65 SYPL2 ACKR3 PIK3R1 ATP6V1B2 ATP6V0D2 ADRA2A TMEM178A SLC25A27 SLC24A2 MICU3 CXCL13 STEAP2 KCNB1 SLAMF8 CCR5 DISC1 CCR1 KLF15 GRIK2 FTH1 GPR27 S1PR1 FPR1 ATP6V0E2 C3AR1 CHRNA9 AQP11 FPR3 CLN3 C5AR1 LIME1 GSTM2 KCTD7
0.000123618	54	763	1.98933	Regulation of ion transport	http://amigo.geneontology.org/amigo/term/GO:0043269	CD4 CNTN1 VMP1 CD84 CAMK2A EDN1 ADCYAP1R1 P2RX7 CAPN3 KCND1 CD33 CACNG7 PIK3CG CXCL12 CCL2 P2RX3 KCNQ4 RGS4 KCNIP2 GRIA2 RAMP3 RGN CHRM3 SYT6 PTPN22 APLNR SERPINE2 FXYD6 STAC2 SYT2 ADRA2A KCNE4 KCNK13 RNF207 KCNB1 CHRNB2 CTSS CCR1 GRM2 GEM TMC1 BEST1 KCNAB3 SLN GLRX NPPA KCNE3 KCNA2 ABAT KCNQ3 DAPK1 LIME1 GSTM2 NEFL
0.000128933	55	785	1.96939	Myeloid leukocyte activation	http://amigo.geneontology.org/amigo/term/GO:0002274	FGR LCP2 CTSA CD84 SPI1 FCGR2B GPR137B LYZ CD200 HMOX1 ATP8B4 CD33 NAMPT PIK3CG BST1 BIN2 QPCT MMP8 A1BG RAB9B TNFAIP6 PREX1 CFP FGL2 LBP CHI3L1 DOCK2 HAVCR2 CD36 TLR4 IRF4 GLIPR1 SLC15A4 CD53 FCGR2A IQGAP2 DOK3 TTBK1 VSIG4 FCER1G CTSS PTX3 RAB4B FTH1 CXCL8 FPR1 C3AR1 CLEC12A HSPA6 TLR1 NPPA FUCA1 C5AR1 SUCNR1 CLEC5A
0.000128933	60	886	1.90351	Tube morphogenesis	http://amigo.geneontology.org/amigo/term/GO:0035239	SOX8 PKD1 DCN HGF ADGRA2 NTN1 SPI1 FAP EDN1 LRP2 HMOX1 PIK3CG CCL2 ALOX12 NR2E1 VEGFA LOX SPARC FGF1 GADD45A RDH10 RAMP3 HOXD11 CHI3L1 APLNR STAB2 SPRY2 GPNMB CYP1B1 FGF2 PROK1 GDF7 ACKR3 SLIT2 CXCL13 RNF207 BBS5 ESM1 VEGFD DACT1 DCHS1 MAPK7 GBX2 NPNT SHOX2 COL4A3 CXCL8 S1PR1 APLN COL8A2 C3AR1 SCG2 PTPRM JUN RGMA CSF1R APOD C5AR1 SOX18 CCDC39
0.000128933	25	238	2.95257	Mononuclear cell migration	http://amigo.geneontology.org/amigo/term/GO:0071674	SPI1 CD200 PIK3CG CXCL12 CCL7 CCL2 CCL8 ITGA4 CH25H ITGB7 NLRP12 SLIT2 CXCL14 PLA2G7 PTPRO CXCL13 SLAMF8 CCR5 CCR1 GPR183 S1PR1 C3AR1 CSF1R APOD C5AR1
0.000148027	50	690	2.03685	Metal ion homeostasis	http://amigo.geneontology.org/amigo/term/GO:0055065	PKD1 CP EDN1 ADCYAP1R1 SNX10 MT3 P2RX7 CAPN3 HMOX1 PIK3CG CXCL12 CCL7 CCL8 P2RX3 HPX CCRL2 RAMP3 RGN APLNR CD36 GPR55 HTR2B EDNRB SLC40A1 FGF2 LPAR6 GPR65 SYPL2 ACKR3 TMEM178A SLC25A27 SLC24A2 MICU3 CXCL13 STEAP2 CCR5 DISC1 CCR1 GRIK2 FTH1 S1PR1 FPR1 C3AR1 CHRNA9 FPR3 CLN3 C5AR1 LIME1 GSTM2 KCTD7
0.000152708	20	165	3.40709	Granulocyte migration	http://amigo.geneontology.org/amigo/term/GO:0097530	EDN1 PIK3CG CCL7 CCL2 CCL8 BST1 VEGFA CSF3R PREX1 LBP SLIT2 CXCL13 SLAMF8 FCER1G CXCL8 C3AR1 SCG2 CSF1R C5AR1 DPP4
0.000161488	38	465	2.29704	Calcium ion transport	http://amigo.geneontology.org/amigo/term/GO:0006816	PKD1 CD4 VMP1 CD84 CAMK2A ADCYAP1R1 P2RX7 CAPN3 CD33 CACNG7 PIK3CG CXCL12 CCL2 CCL8 P2RX3 RGS4 RAMP3 RGN PTPN22 APLNR HTR2B FGF2 STAC2 ADRA2A SLC24A2 MICU3 CHRNB2 CCR5 CCR1 GEM TMC1 BEST1 SLN CHRNA9 NPPA KCNE3 LIME1 GSTM2
0.000170808	30	325	2.59463	Positive regulation of cytosolic calcium ion concentration	http://amigo.geneontology.org/amigo/term/GO:0007204	PKD1 EDN1 ADCYAP1R1 P2RX7 CAPN3 PIK3CG P2RX3 CCRL2 RAMP3 APLNR CD36 GPR55 HTR2B EDNRB FGF2 LPAR6 GPR65 ACKR3 SLC24A2 CXCL13 CCR5 CCR1 S1PR1 FPR1 C3AR1 CHRNA9 FPR3 C5AR1 LIME1 GSTM2
0.000174777	56	815	1.93138	Cellular component morphogenesis	http://amigo.geneontology.org/amigo/term/GO:0032989	SARM1 GAS7 ANOS1 TRIO MYO16 NTN1 EDN1 LRP2 EPB41L3 SEMA5B MT3 CAPN3 CACNG7 HOXA2 CXCL12 PHACTR1 NR2E1 VEGFA ITGA4 EGR2 TMOD2 UNC13A POSTN KIDINS220 DOCK10 PLXNC1 CDH11 SYT2 GDF7 SLIT2 PIK3R1 PTPRO KIF5A CHRNB2 DISC1 MAPK7 GBX2 GFRA2 SHOX2 CTNND2 NPTX1 GAP43 PTPRM CDK5R1 ADAMTSL1 RGMA CSF1R NEB SLITRK2 ZDHHC17 EVL KIF13B ATL1 PLXNB3 TUBB3 NEFL
0.000183438	32	361	2.49161	Regulation of cytosolic calcium ion concentration	http://amigo.geneontology.org/amigo/term/GO:0051480	PKD1 EDN1 ADCYAP1R1 P2RX7 CAPN3 PIK3CG P2RX3 CCRL2 RAMP3 APLNR CD36 GPR55 HTR2B EDNRB FGF2 LPAR6 GPR65 ACKR3 TMEM178A SLC24A2 CXCL13 CCR5 CCR1 S1PR1 FPR1 C3AR1 CHRNA9 FPR3 CLN3 C5AR1 LIME1 GSTM2
0.000197644	100	1769	1.58895	Response to endogenous stimulus	http://amigo.geneontology.org/amigo/term/GO:0009719	PDK4 ANOS1 CALCOCO1 LTBP1 SPI1 PLPP1 CAMK2A FCGR2B EDN1 LRP2 NCOA1 MT3 P2RX7 HMOX1 SRSF5 AQP9 APLP1 NAMPT PIK3CG CXCL12 ALDH3A1 CCL2 P2RX3 LPXN NR2E1 GHR LOX SPARC FGF1 KAT2B ITGA4 RGS4 ACVR2A RAMP3 EGR2 CDO1 CASP9 CHRM3 POSTN PTPN22 KIDINS220 SOX5 APC CD36 LMO2 HTR2B SPRY2 EDNRB TLR4 CPEB2 SMAD6 FGF2 GDF7 SLIT2 PIK3R1 PAM ATP6V1B2 ATP6V0D2 ADRA2A NR3C2 DAB2 CXCL13 STEAP2 FCER1G CTSS KLF15 TNFRSF…
0.000203597	95	1658	1.61056	Cell activation	http://amigo.geneontology.org/amigo/term/GO:0001775	FGR CD4 SLAMF7 BTN3A1 LCP2 CTSA CD84 SPI1 FCGR2B APBB1IP GPR137B EDN1 LYZ CD200 CAPN3 HMOX1 ATP8B4 CD33 NAMPT PIK3CG MAP3K8 CCL2 ALOX12 BST1 BIN2 CD83 CD86 ITGA4 LOXL3 QPCT PLEK MMP8 A1BG SASH3 RAB9B TNFAIP6 PREX1 CFP FGL2 WDFY4 LBP AKAP12 CHI3L1 CD180 PTPN22 DOCK2 HAVCR2 CD36 DOCK10 SERPINE2 GPNMB TLR4 IRF4 GLIPR1 SLC15A4 PIK3R5 CD53 FCGR2A NFKBIZ PIK3R1 IQGAP2 MEGF10 DOK3 TTBK1 ADRA2A MERTK SAM…
0.000207933	39	490	2.23721	Axonogenesis	http://amigo.geneontology.org/amigo/term/GO:0007409	ANOS1 TRIO NTN1 SEMA5B MT3 HOXA2 CXCL12 NR2E1 VEGFA ITGA4 EGR2 PLXNC1 CDH11 GDF7 SLIT2 PIK3R1 PTPRO KIF5A CHRNB2 DISC1 MAPK7 GBX2 GFRA2 SHOX2 NPTX1 GAP43 PTPRM CDK5R1 ADAMTSL1 RGMA CSF1R SLITRK2 ZDHHC17 EVL KIF13B ATL1 PLXNB3 TUBB3 NEFL
0.000240153	20	171	3.28754	Homophilic cell adhesion via plasma membrane adhesion molecules	http://amigo.geneontology.org/amigo/term/GO:0007156	PKD1 CD84 PCDHB4 CDH6 PCDHB8 PCDHB10 PCDHB14 PCDH8 CDH11 CDHR1 DCHS1 PTPRM PCDH18 PLXNB3 PCDHGC3 PCDHGC5 PCDHGC4 PCDHGA5 PCDHGA8 PCDHGA10
0.000251365	60	909	1.85535	Inorganic ion transmembrane transport	http://amigo.geneontology.org/amigo/term/GO:0098660	PKD1 VMP1 ABCC9 ASIC4 P2RX7 CAPN3 KCND1 CLCN7 CACNG7 PIK3CG KCNT1 GLRB P2RX3 KCNQ4 RGS4 KCNIP2 RAMP3 RGN PTPN22 APLNR HTR2B FXYD6 SLC5A6 SLC40A1 FGF2 SLC15A4 STAC2 SLC26A1 ATP6V1B2 ATP6V0D2 ADRA2A KCNE4 TMEM163 KCNK13 SLC25A27 SLC24A2 MICU3 STEAP2 RNF207 KCNB1 CCR5 SLC15A2 SLC13A4 GEM TMC1 BEST1 KCNAB3 SLN ATP6V0E2 GLRX CHRNA9 NPPA KCNE3 UCP3 KCNA2 SLC26A11 KCNQ3 ZDHHC17 LIME1 GSTM2
0.000261034	41	533	2.16219	Axon development	http://amigo.geneontology.org/amigo/term/GO:0061564	ANOS1 TRIO NTN1 SEMA5B MT3 HOXA2 CXCL12 NR2E1 VEGFA ITGA4 EGR2 TSPAN2 PLXNC1 CDH11 GDF7 SLIT2 PIK3R1 PTPRO KIF5A CHRNB2 DISC1 MAPK7 GBX2 GFRA2 SHOX2 NPTX1 GAP43 PTPRM CDK5R1 ADAMTSL1 RGMA CSF1R SLITRK2 ZDHHC17 APOD EVL KIF13B ATL1 PLXNB3 TUBB3 NEFL
0.00028014	102	1832	1.56499	Response to oxygen-containing compound	http://amigo.geneontology.org/amigo/term/GO:1901700	SARM1 PDK4 DCN HGF GRAMD1B SPI1 ABCC9 CAMK2A FCGR2B EDN1 ADCYAP1R1 NCOA1 MT3 P2RX7 HMOX1 CSF2RB MLC1 SRSF5 AQP9 APLP1 NAMPT PIK3CG HOXA2 CXCL12 ALDH3A1 CCL7 CCL2 GLRB P2RX3 MAN1A1 SOD2 GHR SPARC CD86 KAT2B PLSCR4 ITGA4 RGS4 RAMP3 EGR2 CDO1 LBP AKAP12 CASP9 CHRM3 POSTN CD180 PTPN22 APC HAVCR2 CD36 HTR2B EDNRB TLR4 CPEB2 IL18BP SMAD6 CYP1B1 RBP4 SLIT2 PIK3R1 PAM ATP6V1B2 ATP6V0D2 ADRA2A FZD7 CXCL13…
0.000290123	16	117	3.8439	Neutrophil chemotaxis	http://amigo.geneontology.org/amigo/term/GO:0030593	EDN1 PIK3CG CCL7 CCL2 CCL8 BST1 CSF3R PREX1 LBP SLIT2 CXCL13 FCER1G CXCL8 C3AR1 C5AR1 DPP4
0.000306137	70	1127	1.74587	Circulatory system development	http://amigo.geneontology.org/amigo/term/GO:0072359	PKD1 DCN HGF ADGRA2 SPI1 FAP EDN1 LRP2 HMOX1 PIK3CG CCL2 SOD2 NR2E1 VEGFA LOX SPARC FGF1 KAT2B GADD45A RGS4 RAMP3 SNAI1 LIF CHI3L1 APLNR HTR2B STAB2 SPRY2 GPNMB ALPK3 SMAD6 CYP1B1 RBP4 FGF2 SYPL2 PROK1 ACKR3 SLIT2 PAM ABI3BP FZD7 CXCL13 ACAN RNF207 BBS5 ESM1 VEGFD FBN1 DCHS1 MAPK7 GBX2 COL3A1 SHOX2 COL4A3 CXCL8 S1PR1 APLN COL8A2 C3AR1 SCG2 PTPRM NPPA JUN NEB SOCS3 APOD C5AR1 MDM4 SOX18 CCDC39
0.000326097	15	105	4.0155	Positive regulation of leukocyte chemotaxis	http://amigo.geneontology.org/amigo/term/GO:0002690	SPI1 EDN1 CXCL12 CCL7 VEGFA LBP CXCL14 PLA2G7 CXCL13 CCR1 VEGFD CXCL8 C3AR1 CSF1R C5AR1
0.00032981	66	1045	1.77527	Neuron projection development	http://amigo.geneontology.org/amigo/term/GO:0031175	SARM1 GAS7 ANOS1 CNTN1 HGF NCDN TRIO MYO16 NTN1 PPP2R5B CAMK2A ACTL6B LRP2 EPB41L3 SEMA5B MT3 STX1B CACNG7 HOXA2 CXCL12 PHACTR1 NR2E1 VEGFA ITGA4 MARK1 EGR2 PREX1 UNC13A POSTN CAMK1 TSPAN2 KIDINS220 DOCK10 PLXNC1 CDH11 SYT2 GDF7 SLIT2 PIK3R1 PTPRO KIF5A FZD1 CHRNB2 DISC1 MAPK7 GBX2 GFRA2 SHOX2 CTNND2 NPTX1 GAP43 PTPRM CDK5R1 ADAMTSL1 RGMA CSF1R GPRIN3 SLITRK2 ZDHHC17 APOD EVL KIF13B ATL1 PLXNB3 T…
0.000362974	36	448	2.25872	Regulation of metal ion transport	http://amigo.geneontology.org/amigo/term/GO:0010959	CD4 CNTN1 VMP1 CD84 CAMK2A ADCYAP1R1 P2RX7 CAPN3 CD33 PIK3CG CXCL12 CCL2 P2RX3 RGS4 KCNIP2 RAMP3 RGN PTPN22 APLNR SERPINE2 FXYD6 STAC2 ADRA2A KCNE4 RNF207 CCR1 GEM TMC1 BEST1 KCNAB3 SLN GLRX NPPA KCNE3 LIME1 GSTM2
0.000373794	45	620	2.04013	Cell morphogenesis involved in neuron differentiation	http://amigo.geneontology.org/amigo/term/GO:0048667	SARM1 ANOS1 TRIO NTN1 SEMA5B MT3 HOXA2 CXCL12 PHACTR1 NR2E1 VEGFA ITGA4 EGR2 KIDINS220 DOCK10 PLXNC1 CDH11 GDF7 SLIT2 PIK3R1 CDHR1 PTPRO KIF5A CHRNB2 DISC1 MAPK7 GBX2 GFRA2 SHOX2 CTNND2 NPTX1 GAP43 PTPRM CDK5R1 ADAMTSL1 RGMA CSF1R SLITRK2 ZDHHC17 EVL KIF13B ATL1 PLXNB3 TUBB3 NEFL
0.000391631	41	544	2.11847	Angiogenesis	http://amigo.geneontology.org/amigo/term/GO:0001525	DCN HGF ADGRA2 FAP EDN1 HMOX1 PIK3CG CCL2 NR2E1 VEGFA SPARC FGF1 GADD45A RAMP3 CHI3L1 APLNR STAB2 SPRY2 GPNMB CYP1B1 FGF2 PROK1 ACKR3 SLIT2 CXCL13 ESM1 VEGFD MAPK7 GBX2 COL4A3 CXCL8 S1PR1 APLN COL8A2 C3AR1 SCG2 PTPRM JUN APOD C5AR1 SOX18
0.000398342	24	241	2.79919	Positive regulation of ERK1 and ERK2 cascade	http://amigo.geneontology.org/amigo/term/GO:0070374	CD4 MT3 CCL7 CCL2 CCL8 VEGFA RAMP3 AKAP12 CHI3L1 PTPN22 HAVCR2 CD36 GPR55 HTR2B SPRY2 GPNMB TLR4 FGF2 ACKR3 CCR1 NPNT GPR183 CSF1R C5AR1
0.000489908	85	1475	1.61981	Leukocyte activation	http://amigo.geneontology.org/amigo/term/GO:0045321	FGR CD4 SLAMF7 BTN3A1 LCP2 CTSA CD84 SPI1 FCGR2B APBB1IP GPR137B EDN1 LYZ CD200 HMOX1 ATP8B4 CD33 NAMPT PIK3CG MAP3K8 CCL2 BST1 BIN2 CD83 CD86 ITGA4 LOXL3 QPCT MMP8 A1BG SASH3 RAB9B TNFAIP6 PREX1 CFP FGL2 WDFY4 LBP CHI3L1 CD180 PTPN22 DOCK2 HAVCR2 CD36 DOCK10 GPNMB TLR4 IRF4 GLIPR1 SLC15A4 CD53 FCGR2A NFKBIZ PIK3R1 IQGAP2 DOK3 TTBK1 MERTK SAMSN1 VSIG4 FZD7 SLAMF8 FCER1G CHRNB2 CTSS PTX3 RAB4B FTH…
0.000519963	88	1545	1.601	Export from cell	http://amigo.geneontology.org/amigo/term/GO:0140352	FGR SCIN HGF ANK1 CTSA CD84 SPI1 CAMK2A FCGR2B EDN1 LYZ CD200 STX1B HMOX1 ATP8B4 SCG3 OLFM2 CD33 PIK3CG CXCL12 CCL8 BST1 BIN2 STX2 VEGFA SPARC QPCT PLEK MMP8 KCNIP2 A1BG RAB9B TNFAIP6 F13A1 CFP FGL2 LIF UNC13A CHI3L1 SYT6 DOCK2 CD36 SERPINE2 TLR4 SYTL2 RBP4 SLC40A1 GLIPR1 SLC15A4 CD53 FCGR2A SYT2 LHFPL2 IQGAP2 PAM DOK3 ADRA2A KCNE4 MERTK STEAP2 KCNB1 FCER1G CHRNB2 CTSS SLC15A2 PTX3 CCR1 GRM2 VEGF…
0.000539413	24	246	2.74229	Myeloid leukocyte differentiation	http://amigo.geneontology.org/amigo/term/GO:0002573	CD4 SPI1 GPR137B SNX10 VEGFA PDE1B LIF TSPAN2 GPR55 TLR4 IRF4 TCTA PIK3R1 TMEM178A C1QC CCR1 FBN1 GPR183 NRROS JUN CSF1R EVI2B MAFB BGLAP
0.000539413	63	1000	1.77084	Cell-cell adhesion	http://amigo.geneontology.org/amigo/term/GO:0098609	PKD1 CD4 VMP1 NTN1 CD84 SPI1 FCGR2B PCDHB4 CD200 CD33 PIK3CG CXCL12 MAP3K8 CCL2 ALOX12 CD83 VEGFA CDH6 CD86 ITGA4 LOXL3 PLEK CNN3 PCDHB8 PCDHB10 PCDHB14 SASH3 FGL2 PTPN22 HAVCR2 SERPINE2 PCDH8 GPNMB CYP1B1 ITGB7 CDH11 NFKBIZ PIK3R1 MEGF10 NLGN4X CDHR1 VSIG4 CXCL13 PLPP3 DCHS1 MAPK7 NPNT CTNND2 COL8A2 PTPRM CDK5R1 SOX2 ABAT SLITRK2 PCDH18 DPP4 PLXNB3 PCDHGC3 PCDHGC5 PCDHGC4 PCDHGA5 PCDHGA8 PCDHGA10
0.000539413	17	138	3.46264	Neutrophil migration	http://amigo.geneontology.org/amigo/term/GO:1990266	EDN1 PIK3CG CCL7 CCL2 CCL8 BST1 CSF3R PREX1 LBP SLIT2 CXCL13 SLAMF8 FCER1G CXCL8 C3AR1 C5AR1 DPP4
0.000593473	8	31	7.25381	Regulation of neutrophil chemotaxis	http://amigo.geneontology.org/amigo/term/GO:0090022	EDN1 BST1 LBP SLIT2 CXCL8 C3AR1 C5AR1 DPP4
0.000649654	91	1624	1.57505	Generation of neurons	http://amigo.geneontology.org/amigo/term/GO:0048699	SARM1 SOX8 GAS7 ANOS1 CNTN1 HGF NCDN TRIO MYO16 NTN1 PPP2R5B CAMK2A ACTL6B LRP2 EPB41L3 SEMA5B NCOA1 MT3 STX1B CACNG7 HOXA2 CXCL12 ASPA CDK5RAP3 PHACTR1 NR2E1 VEGFA ITGA4 DLX2 MARK1 KCNIP2 EGR2 PREX1 LIF UNC13A POSTN CAMK1 TSPAN2 KIDINS220 SOX5 DAGLA DOCK10 SERPINE2 PLXNC1 EDNRB RTN1 CDH11 SYT2 GDF7 SLIT2 PIK3R1 TTBK1 NLGN4X CDHR1 PTPRO FZD7 KIF5A FZD1 CHRNB2 DISC1 TMC1 VEGFD MAPK7 GPRC5B GBX2 CO…
0.000671308	58	903	1.80542	Regulated exocytosis	http://amigo.geneontology.org/amigo/term/GO:0045055	FGR SCIN HGF CTSA CD84 SPI1 FCGR2B LYZ STX1B HMOX1 ATP8B4 SCG3 CD33 PIK3CG BST1 BIN2 STX2 VEGFA SPARC QPCT PLEK MMP8 A1BG RAB9B TNFAIP6 F13A1 CFP FGL2 UNC13A CHI3L1 SYT6 DOCK2 CD36 GLIPR1 SLC15A4 CD53 FCGR2A SYT2 LHFPL2 IQGAP2 DOK3 ADRA2A STEAP2 KCNB1 FCER1G CTSS PTX3 VEGFD RAB4B FTH1 FPR1 C3AR1 CLEC12A HSPA6 NPPA FUCA1 C5AR1 CLEC5A
0.000671308	9	41	6.17016	Regulation of neutrophil migration	http://amigo.geneontology.org/amigo/term/GO:1902622	EDN1 BST1 LBP SLIT2 SLAMF8 CXCL8 C3AR1 C5AR1 DPP4
0.000724056	55	843	1.83389	Leukocyte activation involved in immune response	http://amigo.geneontology.org/amigo/term/GO:0002366	FGR CTSA CD84 SPI1 FCGR2B APBB1IP LYZ HMOX1 ATP8B4 CD33 PIK3CG BST1 BIN2 CD86 LOXL3 QPCT MMP8 A1BG RAB9B TNFAIP6 CFP FGL2 LBP CHI3L1 CD180 DOCK2 HAVCR2 CD36 DOCK10 TLR4 IRF4 GLIPR1 SLC15A4 CD53 FCGR2A NFKBIZ IQGAP2 DOK3 FCER1G CTSS PTX3 RAB4B FTH1 GPR183 FPR1 C3AR1 CLEC7A CLEC12A HSPA6 NPPA CLCF1 FUCA1 C5AR1 SUCNR1 CLEC5A
0.000735896	64	1034	1.73979	Regulation of anatomical structure morphogenesis	http://amigo.geneontology.org/amigo/term/GO:0022603	FGR SARM1 SOX8 DCN HGF ADGRA2 NTN1 ARHGAP15 EDN1 EPB41L3 SEMA5B MT3 HMOX1 CACNG7 CXCL12 CCL7 CCL2 ALOX12 NR2E1 VEGFA SPARC FGF1 RND3 GADD45A GBP1 PREX1 LIF UNC13A CHI3L1 POSTN APLNR PLXNC1 SPRY2 GPNMB CYP1B1 FGF2 PROK1 SYT2 SLIT2 FGD2 DAB2 FZD7 CXCL13 FZD1 FMNL2 RNF207 CHRNB2 DISC1 TNFRSF11B VEGFD DACT1 MAPK7 SHOX2 COL4A3 CXCL8 C3AR1 PTPRM CDK5R1 RGMA CSF1R C5AR1 KIF13B PLXNB3 NEFL
0.000735896	84	1473	1.60293	Neuron differentiation	http://amigo.geneontology.org/amigo/term/GO:0030182	SARM1 SOX8 GAS7 ANOS1 CNTN1 HGF NCDN TRIO MYO16 NTN1 PPP2R5B CAMK2A ACTL6B LRP2 EPB41L3 SEMA5B NCOA1 MT3 STX1B CACNG7 HOXA2 CXCL12 CDK5RAP3 PHACTR1 NR2E1 VEGFA ITGA4 DLX2 MARK1 KCNIP2 EGR2 PREX1 LIF UNC13A POSTN CAMK1 TSPAN2 KIDINS220 DOCK10 PLXNC1 EDNRB RTN1 CDH11 SYT2 GDF7 SLIT2 PIK3R1 NLGN4X CDHR1 PTPRO FZD7 KIF5A FZD1 CHRNB2 DISC1 TMC1 VEGFD MAPK7 GPRC5B GBX2 GFRA2 SHOX2 CTNND2 S1PR1 NPTX1 GA…
0.000803858	55	847	1.82523	Cell activation involved in immune response	http://amigo.geneontology.org/amigo/term/GO:0002263	FGR CTSA CD84 SPI1 FCGR2B APBB1IP LYZ HMOX1 ATP8B4 CD33 PIK3CG BST1 BIN2 CD86 LOXL3 QPCT MMP8 A1BG RAB9B TNFAIP6 CFP FGL2 LBP CHI3L1 CD180 DOCK2 HAVCR2 CD36 DOCK10 TLR4 IRF4 GLIPR1 SLC15A4 CD53 FCGR2A NFKBIZ IQGAP2 DOK3 FCER1G CTSS PTX3 RAB4B FTH1 GPR183 FPR1 C3AR1 CLEC7A CLEC12A HSPA6 NPPA CLCF1 FUCA1 C5AR1 SUCNR1 CLEC5A
0.000820753	90	1614	1.56739	Positive regulation of multicellular organismal process	http://amigo.geneontology.org/amigo/term/GO:0051240	FGR SOX8 CD4 HGF BTN3A1 NTN1 EDN1 LRP2 P2RX7 CD200 HMOX1 TLR8 PIK3CG CXCL12 ASPA ALOX12 P2RX3 CD83 NR2E1 VEGFA GHR FGF1 CD86 RGS4 MMP8 ACVR2A SASH3 EGR2 SNAI1 LIF LBP AKAP12 CHRM3 CHI3L1 POSTN PTPN22 SOX5 APLNR APC HAVCR2 CD36 HILPDA HTR2B SERPINE2 PLXNC1 EDNRB TLR4 IRF4 CYP1B1 FGF2 LUM NLRP12 NFKBIZ SLIT2 PIK3R1 TTBK1 ADRA2A DAB2 ABI3BP GBP5 FCER1G PKDCC DISC1 CCR1 VEGFD GPRC5B NPNT SHOX2 CXCL8 …
0.000900497	85	1505	1.58752	Cellular response to endogenous stimulus	http://amigo.geneontology.org/amigo/term/GO:0071495	PDK4 ANOS1 CALCOCO1 LTBP1 SPI1 PLPP1 CAMK2A FCGR2B EDN1 LRP2 NCOA1 MT3 P2RX7 SRSF5 AQP9 APLP1 NAMPT PIK3CG CCL2 P2RX3 LPXN NR2E1 GHR LOX FGF1 KAT2B ITGA4 RGS4 ACVR2A RAMP3 CASP9 CHRM3 POSTN PTPN22 KIDINS220 SOX5 APC CD36 LMO2 HTR2B SPRY2 TLR4 CPEB2 SMAD6 FGF2 GDF7 SLIT2 PIK3R1 ATP6V1B2 ATP6V0D2 ADRA2A NR3C2 DAB2 CXCL13 CTSS KLF15 FOLR2 FBN1 MAPK7 GPD1 COL3A1 NPNT CXCL8 HTRA4 NSG2 SERPINB9 ATP6V0E…
0.000934123	28	325	2.42166	Negative regulation of cell adhesion	http://amigo.geneontology.org/amigo/term/GO:0007162	SPI1 FCGR2B CORO2B CXCL12 ALOX12 LPXN VEGFA CD86 LOXL3 GBP1 FGL2 POSTN ADAMDEC1 PTPN22 HAVCR2 SERPINE2 PLXNC1 GPNMB CYP1B1 PIK3R1 PTPRO VSIG4 FZD7 MAPK7 ABAT APOD PLXNB3 MMP12
0.00099554	74	1264	1.64559	Chemical homeostasis	http://amigo.geneontology.org/amigo/term/GO:0048878	PDK4 PKD1 DCN GRAMD1B CP EDN1 ADCYAP1R1 SNX10 CETP MT3 P2RX7 CAPN3 HMOX1 AQP9 PIK3CG CXCL12 CCL7 CCL8 ALOX12 P2RX3 HPX SOD2 VEGFA CCRL2 RAMP3 ORMDL1 RGN APLNR CD36 GPR55 HTR2B EDNRB RBP4 SLC40A1 FGF2 LPAR6 GPR65 SYPL2 UNC80 ACKR3 PIK3R1 ATP6V1B2 ATP6V0D2 ADRA2A TMEM178A SLC25A27 SLC24A2 MICU3 CXCL13 STEAP2 KCNB1 SLAMF8 CCR5 DISC1 CCR1 KLF15 GRM2 GRIK2 FTH1 GPR27 S1PR1 FPR1 ATP6V0E2 C3AR1 CHRNA9 A…
0.0010839	44	632	1.95692	Circulatory system process	http://amigo.geneontology.org/amigo/term/GO:0003013	CELF2 ABCC9 EDN1 LRP2 HMOX1 KCND1 CORO2B CACNG7 NAMPT PIK3CG CXCL12 SOD2 VEGFA ASB3 RGS4 KCNIP2 RAMP3 AKAP12 CHRM3 POSTN CD36 HTR2B EDNRB FXYD6 SLC5A6 GRIP2 SLIT2 ADRA2A PTPRO KCNE4 RNF207 NPR2 SLC15A2 SHOX2 COL4A3 APLN C3AR1 FGFBP3 NPPA KCNE3 ABAT SUCNR1 GSTM2 ADORA3
0.00108958	18	162	3.12317	Positive regulation of leukocyte migration	http://amigo.geneontology.org/amigo/term/GO:0002687	SPI1 EDN1 CXCL12 CCL7 CCL8 VEGFA ITGA4 LBP PLVAP CXCL14 PLA2G7 CXCL13 CCR1 VEGFD CXCL8 C3AR1 CSF1R C5AR1
0.00110118	71	1203	1.65894	Neuron development	http://amigo.geneontology.org/amigo/term/GO:0048666	SARM1 GAS7 ANOS1 CNTN1 HGF NCDN TRIO MYO16 NTN1 PPP2R5B CAMK2A ACTL6B LRP2 EPB41L3 SEMA5B MT3 STX1B CACNG7 HOXA2 CXCL12 PHACTR1 NR2E1 VEGFA ITGA4 MARK1 KCNIP2 EGR2 PREX1 LIF UNC13A POSTN CAMK1 TSPAN2 KIDINS220 DOCK10 PLXNC1 EDNRB CDH11 SYT2 GDF7 SLIT2 PIK3R1 CDHR1 PTPRO KIF5A FZD1 CHRNB2 DISC1 TMC1 MAPK7 GBX2 GFRA2 SHOX2 CTNND2 NPTX1 GAP43 PTPRM CDK5R1 ADAMTSL1 RGMA CSF1R GPRIN3 SLITRK2 ZDHHC17 A…
0.00110118	61	986	1.73896	Cation transmembrane transport	http://amigo.geneontology.org/amigo/term/GO:0098655	PKD1 VMP1 ABCC9 CAMK2A ASIC4 P2RX7 CAPN3 KCND1 CACNG7 PIK3CG KCNT1 CCL2 P2RX3 KCNQ4 RGS4 KCNIP2 GRIA2 RAMP3 RGN PTPN22 APLNR HTR2B FXYD6 SLC40A1 FGF2 SLC15A4 STAC2 UNC80 ATP6V1B2 ATP6V0D2 ADRA2A KCNE4 TMEM163 KCNK13 SLC25A27 SLC24A2 MICU3 STEAP2 RNF207 KCNB1 CCR5 CTSS SLC15A2 GEM TMC1 KCNAB3 SLN ATP6V0E2 GLRX CHRNA9 NPPA KCNE3 UCP3 KCNA2 KCNQ3 ZDHHC17 DAPK1 SLC22A4 LIME1 GSTM2 NEFL
0.0011723	44	635	1.94768	Blood vessel morphogenesis	http://amigo.geneontology.org/amigo/term/GO:0048514	DCN HGF ADGRA2 SPI1 FAP EDN1 LRP2 HMOX1 PIK3CG CCL2 NR2E1 VEGFA LOX SPARC FGF1 GADD45A RAMP3 CHI3L1 APLNR STAB2 SPRY2 GPNMB CYP1B1 FGF2 PROK1 ACKR3 SLIT2 CXCL13 ESM1 VEGFD MAPK7 GBX2 COL4A3 CXCL8 S1PR1 APLN COL8A2 C3AR1 SCG2 PTPRM JUN APOD C5AR1 SOX18
0.00126109	90	1636	1.54631	Secretion	http://amigo.geneontology.org/amigo/term/GO:0046903	FGR SCIN HGF ANK1 CTSA CD84 SPI1 CAMK2A FCGR2B EDN1 NCOA1 SNX10 LYZ CD200 STX1B HMOX1 AQP9 ATP8B4 SCG3 OLFM2 CD33 PIK3CG CXCL12 CCL8 BST1 BIN2 STX2 VEGFA SPARC QPCT PLEK MMP8 A1BG RAB9B TNFAIP6 F13A1 CFP FGL2 LIF CDO1 UNC13A CHRM3 CHI3L1 SYT6 DOCK2 CD36 SERPINE2 EDNRB TLR4 SYTL2 RBP4 GLIPR1 SLC15A4 CD53 FCGR2A SYT2 LHFPL2 IQGAP2 PAM DOK3 ADRA2A MERTK STEAP2 KCNB1 FCER1G CHRNB2 CTSS PTX3 CCR1 GRM2…
0.0013166	8	35	6.4248	Negative regulation of osteoclast differentiation	http://amigo.geneontology.org/amigo/term/GO:0045671	GPR137B GPR55 TLR4 TCTA PIK3R1 TMEM178A FBN1 MAFB
0.00148247	74	1282	1.62249	Regulation of response to external stimulus	http://amigo.geneontology.org/amigo/term/GO:0032101	FGR HGF ADGRA2 SPI1 FCGR2B FAP EDN1 ADCYAP1R1 SEMA5B MT3 CD200 CAPN3 TLR8 PIK3CG CXCL12 CCL7 CCL2 ALOX12 BST1 HPX VEGFA FGF1 MMP8 RAMP3 TNFAIP6 FGL2 LBP CLEC10A CD180 PTPN22 DAGLA HAVCR2 CD36 SERPINE2 EDNRB TLR4 FGF2 SLC15A4 NLRP12 FCGR2A NFKBIZ SLIT2 CXCL14 PLA2G7 TTBK1 PTPRO GBP5 VSIG4 CXCL13 SLAMF8 FCER1G CCR1 VEGFD MAPK7 GPRC5B CXCL8 GPR183 SERPINB9 GPR27 S1PR1 C3AR1 SCG2 NPPA CD163 RGMA CSF1…
0.00160139	22	232	2.66546	Endothelial cell migration	http://amigo.geneontology.org/amigo/term/GO:0043542	DCN ADGRA2 FAP EDN1 HMOX1 PIK3CG ALOX12 LPXN NR2E1 VEGFA SPARC FGF1 GADD45A CYP1B1 FGF2 SLIT2 CXCL13 PLPP3 SCG2 PTPRM DPP4 SOX18
0.00161795	39	545	2.01143	Blood circulation	http://amigo.geneontology.org/amigo/term/GO:0008015	CELF2 ABCC9 EDN1 HMOX1 KCND1 CORO2B CACNG7 NAMPT PIK3CG CXCL12 SOD2 VEGFA ASB3 RGS4 KCNIP2 AKAP12 CHRM3 POSTN HTR2B EDNRB FXYD6 GRIP2 SLIT2 ADRA2A PTPRO KCNE4 RNF207 NPR2 SHOX2 COL4A3 APLN C3AR1 FGFBP3 NPPA KCNE3 ABAT SUCNR1 GSTM2 ADORA3
0.00161886	83	1489	1.56683	Secretion by cell	http://amigo.geneontology.org/amigo/term/GO:0032940	FGR SCIN HGF ANK1 CTSA CD84 SPI1 CAMK2A FCGR2B EDN1 LYZ CD200 STX1B HMOX1 ATP8B4 SCG3 OLFM2 CD33 PIK3CG CXCL12 CCL8 BST1 BIN2 STX2 VEGFA SPARC QPCT PLEK MMP8 A1BG RAB9B TNFAIP6 F13A1 CFP FGL2 LIF UNC13A CHI3L1 SYT6 DOCK2 CD36 SERPINE2 TLR4 SYTL2 RBP4 GLIPR1 SLC15A4 CD53 FCGR2A SYT2 LHFPL2 IQGAP2 PAM DOK3 ADRA2A MERTK STEAP2 KCNB1 FCER1G CHRNB2 CTSS PTX3 CCR1 GRM2 VEGFD RAB4B FTH1 MYRIP GPR27 FPR1…
0.0016434	49	748	1.84133	Vasculature development	http://amigo.geneontology.org/amigo/term/GO:0001944	PKD1 DCN HGF ADGRA2 SPI1 FAP EDN1 LRP2 HMOX1 PIK3CG CCL2 SOD2 NR2E1 VEGFA LOX SPARC FGF1 GADD45A RAMP3 LIF CHI3L1 APLNR STAB2 SPRY2 GPNMB SMAD6 CYP1B1 FGF2 PROK1 ACKR3 SLIT2 CXCL13 ESM1 VEGFD MAPK7 GBX2 COL4A3 CXCL8 S1PR1 APLN COL8A2 C3AR1 SCG2 PTPRM JUN SOCS3 APOD C5AR1 SOX18
0.00165023	77	1355	1.59731	Regulation of phosphorylation	http://amigo.geneontology.org/amigo/term/GO:0042325	FGR PKD1 CD4 CNTN1 HGF LCP2 PPP2R5B EDN1 MT3 P2RX7 TLR8 CADM4 PIK3CG CDK5RAP3 BST1 HPX VEGFA GHR LOX FGF1 CD86 KAT2B PLCL1 GADD45A ACVR2A RAMP3 LIF RGN CHI3L1 DUSP26 CAMK1 PTPN22 APLNR APC CD36 HTR2B SPRY2 EDNRB GPNMB SMAD6 FGF2 PELI2 PIK3R5 NLRP12 GDF7 SLIT2 PIK3R1 FGD2 TTBK1 ADRA2A PTPRO DAB2 MERTK SAMSN1 FZD7 SLAMF8 SQSTM1 PLPP3 NEK10 FBP1 VEGFD GPRC5B GPD1 GFRA2 LDB2 APLN CLEC7A NPPA CLCF1 CD…
0.00169753	34	450	2.12375	Extracellular matrix organization	http://amigo.geneontology.org/amigo/term/GO:0030198	DCN IBSP VCAN FAP HAS3 APLP1 ECM2 NR2E1 LOX SPARC ITGA4 LOXL3 MMP8 POSTN CYP1B1 FGF2 LUM ITGB7 CTSK ABI3BP ACAN CTSS PTX3 TNFRSF11B FBN1 MFAP4 COL3A1 NPNT COL4A3 COL8A2 ADAMTSL1 COL25A1 DPP4 MMP12
0.0017562	62	1027	1.69691	Exocytosis	http://amigo.geneontology.org/amigo/term/GO:0006887	FGR SCIN HGF ANK1 CTSA CD84 SPI1 FCGR2B LYZ STX1B HMOX1 ATP8B4 SCG3 CD33 PIK3CG CCL8 BST1 BIN2 STX2 VEGFA SPARC QPCT PLEK MMP8 A1BG RAB9B TNFAIP6 F13A1 CFP FGL2 UNC13A CHI3L1 SYT6 DOCK2 CD36 SYTL2 GLIPR1 SLC15A4 CD53 FCGR2A SYT2 LHFPL2 IQGAP2 DOK3 ADRA2A STEAP2 KCNB1 FCER1G CTSS PTX3 CCR1 VEGFD RAB4B FTH1 FPR1 C3AR1 CLEC12A HSPA6 NPPA FUCA1 C5AR1 CLEC5A
0.0017562	34	451	2.11904	Extracellular structure organization	http://amigo.geneontology.org/amigo/term/GO:0043062	DCN IBSP VCAN FAP HAS3 APLP1 ECM2 NR2E1 LOX SPARC ITGA4 LOXL3 MMP8 POSTN CYP1B1 FGF2 LUM ITGB7 CTSK ABI3BP ACAN CTSS PTX3 TNFRSF11B FBN1 MFAP4 COL3A1 NPNT COL4A3 COL8A2 ADAMTSL1 COL25A1 DPP4 MMP12
0.00176231	91	1678	1.52436	Protein phosphorylation	http://amigo.geneontology.org/amigo/term/GO:0006468	FGR PDK4 CDK11A PKD1 CD4 CNTN1 HGF TRIO LCP2 PPP2R5B CAMK2A EDN1 MT3 TLR8 CADM4 PIK3CG MAP3K8 CDK5RAP3 CCL2 CCL8 BST1 HPX VEGFA GHR LOX FGF1 CD86 KAT2B PLCL1 MARK1 GADD45A ACVR2A RAMP3 LIF RGN CHI3L1 DUSP26 CAMK1 PTPN22 APLNR APC CD36 HTR2B SPRY2 EDNRB GPNMB ALPK3 TLR4 SMAD6 FGF2 PELI2 PIK3R5 NLRP12 GDF7 SLIT2 PIK3R1 FGD2 TTBK1 ADRA2A PTPRO DAB2 MERTK SAMSN1 SLA NPR2 SQSTM1 PLPP3 PKDCC NEK10 VEGF…
0.00188456	33	434	2.13728	Ameboidal-type cell migration	http://amigo.geneontology.org/amigo/term/GO:0001667	SOX8 DCN ADGRA2 FAP EDN1 SEMA5B HMOX1 PIK3CG ALOX12 LPXN NR2E1 VEGFA SPARC FGF1 ITGA4 GADD45A AKAP12 HTR2B EDNRB CYP1B1 FGF2 ITGB7 SLIT2 CXCL13 PLPP3 MAPRE2 GBX2 SCG2 PTPRM CLN3 EVL DPP4 SOX18
0.00189104	11	71	4.35484	Bone resorption	http://amigo.geneontology.org/amigo/term/GO:0045453	PDK4 NCDN GPR137B SNX10 P2RX7 GPR55 CTSK TNFRSF11B S1PR1 CSF1R BGLAP
0.00192895	28	342	2.30128	Second-messenger-mediated signaling	http://amigo.geneontology.org/amigo/term/GO:0019932	CD4 EDN1 ADCYAP1R1 P2RX7 RASD1 BST1 P2RX3 VEGFA PLEK GBP1 CCRL2 RGN CHRM3 APLNR CD36 HTR2B EDNRB ACKR3 NPR2 CCR5 CCR1 MAPK7 CXCL8 FPR1 KSR2 NPPA GSTM2 SULT1A3
0.00192895	34	454	2.10504	External encapsulating structure organization	http://amigo.geneontology.org/amigo/term/GO:0045229	DCN IBSP VCAN FAP HAS3 APLP1 ECM2 NR2E1 LOX SPARC ITGA4 LOXL3 MMP8 POSTN CYP1B1 FGF2 LUM ITGB7 CTSK ABI3BP ACAN CTSS PTX3 TNFRSF11B FBN1 MFAP4 COL3A1 NPNT COL4A3 COL8A2 ADAMTSL1 COL25A1 DPP4 MMP12
0.00192895	50	776	1.81112	Trans-synaptic signaling	http://amigo.geneontology.org/amigo/term/GO:0099537	NCDN CAMK2A EDN1 PCDHB4 P2RX7 STX1B CACNG7 CCL2 GLRB P2RX3 STX2 NR2E1 PLCL1 RGS4 KCNIP2 GRIA2 PCDHB10 PCDHB14 EGR2 TMOD2 UNC13A AKAP12 CHRM3 CAMK1 SYT6 DTNA DAGLA HTR2B SERPINE2 PCDH8 CDH11 SYT2 NLGN4X GRIK4 ADRA2A SLC24A2 KIF5A KCNB1 CHRNB2 SQSTM1 DISC1 GRM2 GRIK2 NPTX1 CHRNA9 CHRM4 ABAT KCNQ3 CLN3 OMP
0.00198724	38	533	2.00398	Regulation of ion transmembrane transport	http://amigo.geneontology.org/amigo/term/GO:0034765	VMP1 CAMK2A P2RX7 CAPN3 KCND1 CACNG7 PIK3CG CCL2 KCNQ4 RGS4 KCNIP2 GRIA2 RAMP3 RGN CHRM3 PTPN22 APLNR FXYD6 STAC2 ADRA2A KCNE4 KCNK13 RNF207 KCNB1 CTSS GEM TMC1 KCNAB3 SLN GLRX NPPA KCNE3 KCNA2 KCNQ3 DAPK1 LIME1 GSTM2 NEFL
0.00204811	68	1167	1.63786	Regulation of protein phosphorylation	http://amigo.geneontology.org/amigo/term/GO:0001932	FGR PKD1 CD4 CNTN1 HGF LCP2 PPP2R5B EDN1 MT3 TLR8 CADM4 PIK3CG CDK5RAP3 BST1 HPX VEGFA GHR LOX FGF1 CD86 KAT2B PLCL1 GADD45A ACVR2A RAMP3 LIF RGN CHI3L1 DUSP26 CAMK1 PTPN22 APLNR APC CD36 HTR2B SPRY2 EDNRB GPNMB SMAD6 FGF2 PELI2 PIK3R5 NLRP12 GDF7 SLIT2 FGD2 TTBK1 ADRA2A PTPRO DAB2 SAMSN1 SQSTM1 PLPP3 NEK10 VEGFD GPRC5B GFRA2 CLEC7A NPPA CLCF1 CDK5R1 CSF1R SOCS3 CLN3 TLR7 C5AR1 LIME1 STRADA
0.00204811	25	290	2.42315	Axon guidance	http://amigo.geneontology.org/amigo/term/GO:0007411	ANOS1 TRIO NTN1 SEMA5B HOXA2 CXCL12 VEGFA EGR2 PLXNC1 GDF7 SLIT2 PIK3R1 PTPRO KIF5A MAPK7 GBX2 GFRA2 GAP43 PTPRM CDK5R1 ADAMTSL1 CSF1R EVL PLXNB3 TUBB3
0.00204811	3	3	28.1085	Central nervous system segmentation	http://amigo.geneontology.org/amigo/term/GO:0035283	HOXA2 EGR2 MAFB
0.00204811	3	3	28.1085	Brain segmentation	http://amigo.geneontology.org/amigo/term/GO:0035284	HOXA2 EGR2 MAFB
0.00205327	47	717	1.84254	Blood vessel development	http://amigo.geneontology.org/amigo/term/GO:0001568	PKD1 DCN HGF ADGRA2 SPI1 FAP EDN1 LRP2 HMOX1 PIK3CG CCL2 NR2E1 VEGFA LOX SPARC FGF1 GADD45A RAMP3 CHI3L1 APLNR STAB2 SPRY2 GPNMB SMAD6 CYP1B1 FGF2 PROK1 ACKR3 SLIT2 CXCL13 ESM1 VEGFD MAPK7 GBX2 COL4A3 CXCL8 S1PR1 APLN COL8A2 C3AR1 SCG2 PTPRM JUN SOCS3 APOD C5AR1 SOX18
0.00205327	69	1190	1.62982	Positive regulation of immune system process	http://amigo.geneontology.org/amigo/term/GO:0002684	FGR CD4 BTN3A1 LCP2 CD84 SPI1 FCGR2B EDN1 FYB1 HMOX1 TLR8 CXCL12 MAP3K8 CCL7 CCL2 CCL8 BST1 LPXN HPX BTN3A3 CD83 VEGFA CD86 ITGA4 GBP1 MMP8 SASH3 CFP LIF LBP PLVAP CLEC10A PTPN22 HAVCR2 CD36 TLR4 RBP4 SLC15A4 FCGR2A NFKBIZ PIK3R1 CXCL14 PLA2G7 TTBK1 GBP5 VSIG4 CXCL13 FCER1G C1QC CHRNB2 CCR1 VEGFD MFAP4 GPRC5B CXCL8 GPR183 FPR1 C3AR1 CLEC7A NPPA CLCF1 JUN CSF1R EVI2B FPR3 C5AR1 DPP4 LIME1 MMP12
0.00205786	53	843	1.7672	Inorganic cation transmembrane transport	http://amigo.geneontology.org/amigo/term/GO:0098662	PKD1 VMP1 ABCC9 ASIC4 P2RX7 CAPN3 KCND1 CACNG7 PIK3CG KCNT1 P2RX3 KCNQ4 RGS4 KCNIP2 RAMP3 RGN PTPN22 APLNR HTR2B FXYD6 SLC40A1 FGF2 SLC15A4 STAC2 ATP6V1B2 ATP6V0D2 ADRA2A KCNE4 TMEM163 KCNK13 SLC25A27 SLC24A2 MICU3 STEAP2 RNF207 KCNB1 CCR5 SLC15A2 GEM TMC1 KCNAB3 SLN ATP6V0E2 GLRX CHRNA9 NPPA KCNE3 UCP3 KCNA2 KCNQ3 ZDHHC17 LIME1 GSTM2
0.00207307	16	142	3.16716	Regulation of mononuclear cell migration	http://amigo.geneontology.org/amigo/term/GO:0071675	SPI1 CD200 CXCL12 CCL7 CCL2 ITGA4 SLIT2 CXCL14 PLA2G7 CXCL13 SLAMF8 CCR1 C3AR1 CSF1R APOD C5AR1
0.00208949	25	291	2.41482	Neuron projection guidance	http://amigo.geneontology.org/amigo/term/GO:0097485	ANOS1 TRIO NTN1 SEMA5B HOXA2 CXCL12 VEGFA EGR2 PLXNC1 GDF7 SLIT2 PIK3R1 PTPRO KIF5A MAPK7 GBX2 GFRA2 GAP43 PTPRM CDK5R1 ADAMTSL1 CSF1R EVL PLXNB3 TUBB3
0.00220752	4	7	16.062	Rhombomere development	http://amigo.geneontology.org/amigo/term/GO:0021546	HOXA2 EGR2 GBX2 MAFB
0.00229838	14	114	3.45192	Response to chemokine	http://amigo.geneontology.org/amigo/term/GO:1990868	EDN1 CXCL12 CCL7 CCL2 CCL8 LOX CCRL2 ACKR3 SLIT2 CXCL13 CCR5 CCR1 CXCL8 ACKR1
0.00229838	14	114	3.45192	Cellular response to chemokine	http://amigo.geneontology.org/amigo/term/GO:1990869	EDN1 CXCL12 CCL7 CCL2 CCL8 LOX CCRL2 ACKR3 SLIT2 CXCL13 CCR5 CCR1 CXCL8 ACKR1
0.00247141	11	74	4.17829	Cell adhesion mediated by integrin	http://amigo.geneontology.org/amigo/term/GO:0033627	PIK3CG LPXN ITGA4 LIF CYP1B1 ITGB7 CXCL13 PLPP3 FBN1 NPNT DPP4
0.00249602	71	1245	1.60298	Immune effector process	http://amigo.geneontology.org/amigo/term/GO:0002252	FGR SLAMF7 CTSA CD84 SPI1 FCGR2B APBB1IP LYZ HMOX1 TLR8 ATP8B4 CD33 PIK3CG BST1 HPX BIN2 BTN3A3 CD86 LOXL3 QPCT MMP8 A1BG SASH3 RAB9B TNFAIP6 CFP FGL2 LBP CHI3L1 CD180 PTPN22 DOCK2 HAVCR2 CD36 DOCK10 TLR4 IRF4 RBP4 GLIPR1 SLC15A4 CD53 FCGR2A LYST NFKBIZ PIK3R1 IQGAP2 DOK3 VSIG4 SLAMF8 FCER1G C1QC CTSS PTX3 MFAP4 GPRC5B RAB4B FTH1 GPR183 SERPINB9 FPR1 C3AR1 CLEC7A CLEC12A HSPA6 NPPA CLCF1 FUCA1 C5…
0.00249602	49	767	1.79572	Chemical synaptic transmission	http://amigo.geneontology.org/amigo/term/GO:0007268	NCDN CAMK2A EDN1 PCDHB4 P2RX7 STX1B CACNG7 CCL2 GLRB P2RX3 STX2 NR2E1 PLCL1 RGS4 KCNIP2 GRIA2 PCDHB10 PCDHB14 EGR2 TMOD2 UNC13A AKAP12 CHRM3 CAMK1 SYT6 DTNA HTR2B SERPINE2 PCDH8 CDH11 SYT2 NLGN4X GRIK4 ADRA2A SLC24A2 KIF5A KCNB1 CHRNB2 SQSTM1 DISC1 GRM2 GRIK2 NPTX1 CHRNA9 CHRM4 ABAT KCNQ3 CLN3 OMP
0.00249602	42	622	1.898	Regulation of transmembrane transport	http://amigo.geneontology.org/amigo/term/GO:0034762	VMP1 CAMK2A EDN1 P2RX7 CAPN3 KCND1 CACNG7 PIK3CG CCL2 KCNQ4 RGS4 KCNIP2 GRIA2 RAMP3 RGN CHRM3 PTPN22 APLNR FXYD6 STAC2 PIK3R1 ADRA2A KCNE4 KCNK13 SLC25A27 RNF207 KCNB1 CTSS KLF15 GEM TMC1 KCNAB3 SLN GLRX NPPA KCNE3 KCNA2 KCNQ3 DAPK1 LIME1 GSTM2 NEFL
0.00249602	49	767	1.79572	Anterograde trans-synaptic signaling	http://amigo.geneontology.org/amigo/term/GO:0098916	NCDN CAMK2A EDN1 PCDHB4 P2RX7 STX1B CACNG7 CCL2 GLRB P2RX3 STX2 NR2E1 PLCL1 RGS4 KCNIP2 GRIA2 PCDHB10 PCDHB14 EGR2 TMOD2 UNC13A AKAP12 CHRM3 CAMK1 SYT6 DTNA HTR2B SERPINE2 PCDH8 CDH11 SYT2 NLGN4X GRIK4 ADRA2A SLC24A2 KIF5A KCNB1 CHRNB2 SQSTM1 DISC1 GRM2 GRIK2 NPTX1 CHRNA9 CHRM4 ABAT KCNQ3 CLN3 OMP
0.00268646	101	1940	1.46338	Negative regulation of response to stimulus	http://amigo.geneontology.org/amigo/term/GO:0048585	FGR SARM1 DCN HGF ADGRA2 LTBP1 NTN1 CD84 SPI1 PPP2R5B FCGR2B FAP EDN1 ADCYAP1R1 LRP2 SEMA5B P2RX7 RGS1 RGS17 CD200 HMOX1 APLP1 CADM4 NAMPT CXCL12 CDK5RAP3 CCL2 ALOX12 LPXN SOD2 EYA4 APC2 LOXL3 IL1R2 DLX2 PLEK RGS4 GBP1 ACVR2A RAMP3 TNFAIP6 SNAI1 FGL2 LIF KLK14 DUSP26 PTPN22 APLNR APC HAVCR2 HTR2B SERPINE2 SPRY2 TLR4 IRF4 SMAD6 FGF2 NLRP12 FCGR2A ACKR3 SLIT2 DDIT4L NLGN4X ADRA2A PTPRO DAB2 SAMSN1 …
0.00277084	68	1183	1.6157	Anatomical structure formation involved in morphogenesis	http://amigo.geneontology.org/amigo/term/GO:0048646	SOX8 DCN HGF ADGRA2 FAP EDN1 LRP2 EPB41L3 CAPN3 HMOX1 PIK3CG CCL2 NKX3-2 NR2E1 VEGFA SPARC FGF1 ITGA4 GADD45A MMP8 CSF3R RDH10 RAMP3 EGR2 SNAI1 TMOD2 CASP9 CHI3L1 CAMK1 APLNR CD36 STAB2 PCDH8 SPRY2 GPNMB CYP1B1 RBP4 FGF2 CD53 PROK1 GDF7 ACKR3 TCTA SLIT2 FZD7 CXCL13 ESM1 VEGFD DCHS1 MAPK7 GBX2 COL4A3 CXCL8 S1PR1 APLN COL8A2 C3AR1 SCG2 PTPRM CDK5R1 JUN SOX2 RGMA NEB APOD C5AR1 SOX18 MAFB
0.00280312	9	51	4.96032	Regulation of granulocyte chemotaxis	http://amigo.geneontology.org/amigo/term/GO:0071622	EDN1 BST1 LBP SLIT2 CXCL8 C3AR1 CSF1R C5AR1 DPP4
0.00291666	51	815	1.75894	Synaptic signaling	http://amigo.geneontology.org/amigo/term/GO:0099536	NCDN CAMK2A EDN1 PCDHB4 P2RX7 STX1B CACNG7 CCL2 GLRB P2RX3 STX2 NR2E1 PLCL1 RGS4 KCNIP2 GRIA2 PCDHB10 PCDHB14 EGR2 TMOD2 UNC13A AKAP12 CHRM3 CAMK1 SYT6 DTNA DAGLA HTR2B SERPINE2 PCDH8 CDH11 SYT2 NLGN4X GRIK4 ADRA2A SLC24A2 KIF5A KCNB1 CHRNB2 SQSTM1 DISC1 GRM2 GRIK2 NPTX1 CHRNA9 CDK5R1 CHRM4 ABAT KCNQ3 CLN3 OMP
0.00293801	37	527	1.97346	Skeletal system development	http://amigo.geneontology.org/amigo/term/GO:0001501	FGR SCIN PKD1 VCAN EDN1 SNX10 HOXA2 NKX3-2 MGP GHR LOX DLX2 RDH10 ACVR2A SNAI1 RGN CHI3L1 SOX5 RBP4 FGF2 LUM CDH11 CTSK ACAN NPR2 PKDCC FRZB RANBP3L TNFRSF11B FBN1 DCHS1 COL3A1 SHOX2 CYTL1 HOXB4 PRELP BGLAP
0.00325119	13	104	3.51356	Chemokine-mediated signaling pathway	http://amigo.geneontology.org/amigo/term/GO:0070098	EDN1 CXCL12 CCL7 CCL2 CCL8 CCRL2 ACKR3 SLIT2 CXCL13 CCR5 CCR1 CXCL8 ACKR1
0.00329639	43	652	1.85378	Myeloid cell activation involved in immune response	http://amigo.geneontology.org/amigo/term/GO:0002275	FGR CTSA CD84 SPI1 LYZ HMOX1 ATP8B4 CD33 PIK3CG BST1 BIN2 QPCT MMP8 A1BG RAB9B TNFAIP6 CFP FGL2 LBP CHI3L1 DOCK2 HAVCR2 CD36 GLIPR1 SLC15A4 CD53 FCGR2A IQGAP2 DOK3 FCER1G CTSS PTX3 RAB4B FTH1 FPR1 C3AR1 CLEC12A HSPA6 NPPA FUCA1 C5AR1 SUCNR1 CLEC5A
0.0034032	15	134	3.14647	Regulation of myeloid leukocyte differentiation	http://amigo.geneontology.org/amigo/term/GO:0002761	CD4 GPR137B LIF GPR55 TLR4 TCTA PIK3R1 TMEM178A C1QC CCR1 FBN1 JUN EVI2B MAFB BGLAP
0.00360088	38	553	1.93151	Small GTPase mediated signal transduction	http://amigo.geneontology.org/amigo/term/GO:0007264	FAM13B TRIO NTN1 ARHGAP15 ADCYAP1R1 HMOX1 CADM4 PIK3CG RND3 RAB9B PREX1 ARHGEF6 STARD8 DOCK2 GPR55 DOCK10 SPRY2 RALGPS1 ARHGAP20 FGF2 LPAR6 GPR65 RGL1 SLIT2 DOK3 FGD2 ADRA2A RASGRP3 SQSTM1 ARHGAP25 FBP1 MAPRE2 RAB4B COL3A1 CAVIN4 KSR2 JUN ERAS
0.00369734	31	416	2.09462	Ossification	http://amigo.geneontology.org/amigo/term/GO:0001503	FGR SOX8 HGF IBSP VCAN SNX10 P2RX7 HOXA2 MGP LOX SPARC ACVR2A EGR2 SNAI1 GPNMB SMAD6 FGF2 CDH11 CTSK FZD1 NPR2 PKDCC CCR1 RANBP3L DCHS1 NPNT SHOX2 S1PR1 SOX2 BGLAP CLEC5A
0.00370169	41	615	1.8739	Leukocyte differentiation	http://amigo.geneontology.org/amigo/term/GO:0002521	CD4 SPI1 FCGR2B GPR137B SNX10 CD83 VEGFA CD86 ITGA4 LOXL3 SASH3 PDE1B PREX1 FGL2 LIF TSPAN2 PTPN22 DOCK2 GPR55 DOCK10 TLR4 IRF4 NFKBIZ TCTA PIK3R1 TMEM178A MERTK FZD7 SLAMF8 FCER1G C1QC CCR1 FBN1 GPR183 NRROS CLCF1 JUN CSF1R EVI2B MAFB BGLAP
0.00379844	13	106	3.44727	Phospholipase C-activating G protein-coupled receptor signaling pathway	http://amigo.geneontology.org/amigo/term/GO:0007200	EDN1 GPR55 HTR2B EDNRB LPAR6 GPR65 ADRA2A GPR27 S1PR1 FPR1 C3AR1 FPR3 C5AR1
0.00379844	44	678	1.82415	Regulation of cell activation	http://amigo.geneontology.org/amigo/term/GO:0050865	FGR CD4 CD84 SPI1 FCGR2B GPR137B CD200 CAPN3 HMOX1 CD33 MAP3K8 CCL2 ALOX12 BST1 CD83 CD86 LOXL3 PLEK MMP8 SASH3 FGL2 LBP PTPN22 HAVCR2 SERPINE2 GPNMB TLR4 IRF4 SLC15A4 NFKBIZ PIK3R1 TTBK1 MERTK SAMSN1 VSIG4 SLAMF8 FCER1G CHRNB2 GPR183 CLEC7A NPPA CLCF1 ABAT DPP4
0.00382361	42	637	1.85331	Endocytosis	http://amigo.geneontology.org/amigo/term/GO:0006897	FCGR2B LRP2 SNX10 STX1B MLC1 APLP1 CACNG7 PIK3CG HPX BIN2 VEGFA GHR SPARC ITGA4 LOXL3 RAMP3 HEATR5A LBP CLEC10A DOCK2 CD36 HTR2B STAB2 SYT2 ACKR3 MEGF10 NLGN4X DAB2 STEAP2 COLEC12 FCER1G ARHGAP25 PTX3 RAB4B CXCL8 APLN CLEC7A CD163 CD163L1 TMPRSS2 CLN3 FCGR1B
0.00385699	15	136	3.1002	Positive regulation of calcium ion transport	http://amigo.geneontology.org/amigo/term/GO:0051928	VMP1 CAMK2A ADCYAP1R1 P2RX7 CAPN3 CXCL12 CCL2 P2RX3 RAMP3 RGN APLNR STAC2 CCR1 KCNE3 GSTM2
0.00391886	30	399	2.11342	Regulation of cation transmembrane transport	http://amigo.geneontology.org/amigo/term/GO:1904062	VMP1 CAMK2A CAPN3 CACNG7 PIK3CG CCL2 RGS4 KCNIP2 GRIA2 RAMP3 RGN PTPN22 APLNR FXYD6 STAC2 ADRA2A KCNE4 RNF207 CTSS GEM TMC1 KCNAB3 SLN GLRX NPPA KCNE3 DAPK1 LIME1 GSTM2 NEFL
0.00405503	20	218	2.57876	Calcium-mediated signaling	http://amigo.geneontology.org/amigo/term/GO:0019722	CD4 EDN1 P2RX7 BST1 P2RX3 PLEK GBP1 CCRL2 RGN CHRM3 HTR2B EDNRB ACKR3 CCR5 CCR1 MAPK7 CXCL8 KSR2 GSTM2 SULT1A3
0.0044688	15	138	3.05527	Regulation of endothelial cell proliferation	http://amigo.geneontology.org/amigo/term/GO:0001936	HMOX1 CXCL12 CCL2 VEGFA SPARC ITGA4 APLNR HTR2B FGF2 VEGFD COL4A3 APLN SCG2 PTPRM PLXNB3
0.00458478	25	309	2.27415	Regulation of cellular response to growth factor stimulus	http://amigo.geneontology.org/amigo/term/GO:0090287	DCN ADGRA2 LTBP1 PPP2R5B LRP2 MT3 CADM4 LOX FGF1 ACVR2A SPRY2 SMAD6 FGF2 SLIT2 DAB2 CXCL13 FBN1 NPNT HTRA4 APLN NRROS FGFBP3 RGMA LRIT3 ZDHHC17
0.00461076	9	55	4.59957	Negative regulation of myeloid leukocyte differentiation	http://amigo.geneontology.org/amigo/term/GO:0002762	GPR137B GPR55 TLR4 TCTA PIK3R1 TMEM178A C1QC FBN1 MAFB
0.00461076	9	55	4.59957	Glutamate receptor signaling pathway	http://amigo.geneontology.org/amigo/term/GO:0007215	GRIA2 DAGLA GRIK4 KCNB1 GRM2 GRIK2 CDK5R1 CLN3 SULT1A3
0.00480557	47	750	1.76147	Response to growth factor	http://amigo.geneontology.org/amigo/term/GO:0070848	ANOS1 DCN HGF ADGRA2 IBSP LTBP1 SPI1 PPP2R5B EDN1 LRP2 MT3 CADM4 CCL2 LPXN VEGFA LOX FGF1 ACVR2A POSTN KIDINS220 SOX5 SPRY2 SMAD6 FGF2 LUM GDF7 SLIT2 DAB2 CXCL13 VEGFD FBN1 MAPK7 COL3A1 NPNT CXCL8 HTRA4 APLN NRROS RGMB FGFBP3 JUN GAS1 SOX2 RGMA LRIT3 ZDHHC17 BGLAP
0.00514269	40	606	1.85535	Morphogenesis of an epithelium	http://amigo.geneontology.org/amigo/term/GO:0002009	SOX8 PKD1 HGF NTN1 EDN1 LRP2 ALOX12 VEGFA FGF1 GORAB RDH10 SNAI1 LIF HOXD11 KLK14 APLNR PCDH8 SPRY2 FGF2 GDF7 TMEFF2 SLIT2 DAB2 FZD7 FZD1 RNF207 FRZB BBS5 DACT1 DCHS1 GBX2 NPNT RGMA CSF1R HOXB4 SOCS3 SOX18 CRYGS MMP12 CCDC39
0.00521811	94	1816	1.45496	Positive regulation of molecular function	http://amigo.geneontology.org/amigo/term/GO:0044093	FGR PKD1 CD4 FAM13B LCP2 VMP1 PPP2R5B CAMK2A ARHGAP15 EDN1 ADCYAP1R1 MT3 RGS1 RGS17 CD200 CAPN3 CD33 PIK3CG CCL7 CCL2 CCL8 ALOX12 VEGFA GHR FGF1 CD86 APC2 PLCL1 PLEK RGS4 MMP8 KCNIP2 PREX1 USP6 ARHGEF6 STARD8 RGN EDA2R CASP9 CHI3L1 CAMK1 DOCK2 CD36 GPR55 DOCK10 HTR2B SPRY2 TLR4 IRF4 ARHGAP20 FGF2 GPR65 PIK3R5 STAC2 NLRP12 IQGAP2 FGD2 TTBK1 HMBOX1 ADRA2A RASGRP3 MERTK CXCL13 FZD1 RNF207 PLPP3 CTSS…
0.0055493	72	1308	1.54726	Cellular response to cytokine stimulus	http://amigo.geneontology.org/amigo/term/GO:0071345	CD4 HGF TNFRSF9 IL17RB SPI1 CAMK2A EDN1 SNX10 MT3 HMOX1 CSF2RB CXCL12 MAP3K8 CCL7 CCL2 CCL8 HPX SOD2 VEGFA GHR LOX LIFR CD86 ITGA4 IL1R2 GBP1 CSF3R CCRL2 PDE1B F13A1 LIF LBP PLVAP AKAP12 EDA2R XAF1 CHI3L1 POSTN CD36 SPRY2 TLR4 IRF4 IL18BP FGF2 PELI2 NLRP12 ACKR3 SLIT2 PIK3R1 GBP5 SLA CXCL13 FCER1G NPR2 CCR5 SQSTM1 CCR1 TNFRSF11B GPD1 NPNT MAT2A CXCL8 S1PR1 FPR1 CLCF1 SOX2 CSF1R SOCS3 DAPK1 FCGR1B…
0.00571562	7	34	5.78705	Dendritic cell migration	http://amigo.geneontology.org/amigo/term/GO:0036336	SPI1 PIK3CG NLRP12 SLAMF8 CCR5 CCR1 GPR183
0.00596832	4	9	12.4927	Negative regulation of myeloid leukocyte mediated immunity	http://amigo.geneontology.org/amigo/term/GO:0002887	CD84 SPI1 FCGR2B HMOX1
0.00596832	10	70	4.0155	Superoxide metabolic process	http://amigo.geneontology.org/amigo/term/GO:0006801	EDN1 MT3 ALOX12 BST1 SOD2 NCF2 PREX1 CD36 CLEC7A NRROS
0.00596832	76	1404	1.52154	Response to cytokine	http://amigo.geneontology.org/amigo/term/GO:0034097	CD4 HGF TNFRSF9 IL17RB SPI1 CAMK2A EDN1 SNX10 MT3 HMOX1 CSF2RB CXCL12 MAP3K8 CCL7 CCL2 CCL8 HPX SOD2 VEGFA GHR LOX SPARC LIFR CD86 ITGA4 IL1R2 GBP1 CSF3R CCRL2 PDE1B F13A1 LIF LBP PLVAP AKAP12 EDA2R XAF1 CHI3L1 POSTN CD36 SPRY2 TLR4 IRF4 IL18BP FGF2 PELI2 NLRP12 ACKR3 SLIT2 PIK3R1 GBP5 SLA CXCL13 FCER1G NPR2 CCR5 SQSTM1 CCR1 TNFRSF11B MAPK7 GPD1 COL3A1 NPNT MAT2A CXCL8 S1PR1 FPR1 CLCF1 JUN SOX2 C…
0.00596832	3	4	21.0814	Sequestering of TGFbeta in extracellular matrix	http://amigo.geneontology.org/amigo/term/GO:0035583	LTBP1 FBN1 NRROS
0.00596832	5	16	8.78391	Induction of positive chemotaxis	http://amigo.geneontology.org/amigo/term/GO:0050930	CXCL12 VEGFA VEGFD CXCL8 SCG2
0.00596832	72	1313	1.54137	Cellular response to oxygen-containing compound	http://amigo.geneontology.org/amigo/term/GO:1901701	PDK4 HGF GRAMD1B SPI1 CAMK2A FCGR2B EDN1 MT3 P2RX7 MLC1 SRSF5 AQP9 APLP1 NAMPT PIK3CG HOXA2 CCL7 CCL2 P2RX3 SOD2 GHR CD86 KAT2B PLSCR4 ITGA4 RGS4 RAMP3 LBP CASP9 CHRM3 POSTN CD180 PTPN22 APC HAVCR2 CD36 HTR2B EDNRB TLR4 CPEB2 IL18BP CYP1B1 SLIT2 PIK3R1 ATP6V1B2 ATP6V0D2 ADRA2A FZD7 CXCL13 COLEC12 KCNB1 CHRNB2 CCR5 KLF15 FOLR2 FBN1 MAPK7 GPD1 CXCL8 NSG2 GPR27 ATP6V0E2 CLEC7A CDK5R1 JUN CHRM4 GPR17…
0.00596832	3	4	21.0814	Negative regulation of neutrophil migration	http://amigo.geneontology.org/amigo/term/GO:1902623	SLIT2 SLAMF8 DPP4
0.00643102	84	1595	1.48032	Regulation of phosphate metabolic process	http://amigo.geneontology.org/amigo/term/GO:0019220	FGR PDK4 PKD1 CD4 CNTN1 HGF LCP2 PPP2R5B EDN1 ADCYAP1R1 MT3 P2RX7 TLR8 CD33 CADM4 PIK3CG CDK5RAP3 BST1 HPX PHACTR1 VEGFA GHR LOX FGF1 CD86 KAT2B PLCL1 PLEK GADD45A ACVR2A RAMP3 LIF RGN CHI3L1 DUSP26 CAMK1 PTPN22 APLNR APC CD36 HTR2B SPRY2 EDNRB GPNMB SYTL2 SMAD6 FGF2 PELI2 PIK3R5 NLRP12 GDF7 SLIT2 PIK3R1 FGD2 TTBK1 ADRA2A PTPRO DAB2 MERTK SAMSN1 FZD7 SLAMF8 SQSTM1 PLPP3 NEK10 FBP1 VEGFD GPRC5B GP…
0.00643102	25	318	2.20979	Positive regulation of ion transport	http://amigo.geneontology.org/amigo/term/GO:0043270	CNTN1 VMP1 CAMK2A EDN1 ADCYAP1R1 P2RX7 CAPN3 CXCL12 CCL2 P2RX3 KCNIP2 RAMP3 RGN APLNR STAC2 ADRA2A RNF207 CHRNB2 CTSS CCR1 GLRX NPPA KCNE3 ABAT GSTM2
0.00643102	9	58	4.36167	Regulation of catecholamine secretion	http://amigo.geneontology.org/amigo/term/GO:0050433	CXCL12 SYT6 SYT2 ADRA2A KCNB1 CHRNB2 GRM2 KCNA2 ABAT
0.00643102	84	1595	1.48032	Regulation of phosphorus metabolic process	http://amigo.geneontology.org/amigo/term/GO:0051174	FGR PDK4 PKD1 CD4 CNTN1 HGF LCP2 PPP2R5B EDN1 ADCYAP1R1 MT3 P2RX7 TLR8 CD33 CADM4 PIK3CG CDK5RAP3 BST1 HPX PHACTR1 VEGFA GHR LOX FGF1 CD86 KAT2B PLCL1 PLEK GADD45A ACVR2A RAMP3 LIF RGN CHI3L1 DUSP26 CAMK1 PTPN22 APLNR APC CD36 HTR2B SPRY2 EDNRB GPNMB SYTL2 SMAD6 FGF2 PELI2 PIK3R5 NLRP12 GDF7 SLIT2 PIK3R1 FGD2 TTBK1 ADRA2A PTPRO DAB2 MERTK SAMSN1 FZD7 SLAMF8 SQSTM1 PLPP3 NEK10 FBP1 VEGFD GPRC5B GP…
0.00643102	22	263	2.35128	Connective tissue development	http://amigo.geneontology.org/amigo/term/GO:0061448	SOX8 SCIN PKD1 SPI1 EDN1 NKX3-2 MGP GHR LOX DLX2 SNAI1 CHI3L1 SOX5 FGF2 LUM CTSK GDF7 ACAN PKDCC FRZB SHOX2 CYTL1
0.00680675	45	722	1.75192	Cellular response to growth factor stimulus	http://amigo.geneontology.org/amigo/term/GO:0071363	ANOS1 DCN HGF ADGRA2 IBSP LTBP1 SPI1 PPP2R5B EDN1 LRP2 MT3 CADM4 CCL2 LPXN VEGFA LOX FGF1 ACVR2A POSTN KIDINS220 SOX5 SPRY2 SMAD6 FGF2 GDF7 SLIT2 DAB2 CXCL13 VEGFD FBN1 MAPK7 COL3A1 NPNT CXCL8 HTRA4 APLN NRROS RGMB FGFBP3 JUN GAS1 RGMA LRIT3 ZDHHC17 BGLAP
0.00681133	16	161	2.79339	Regulation of calcium ion transmembrane transport	http://amigo.geneontology.org/amigo/term/GO:1903169	VMP1 CAPN3 PIK3CG RAMP3 RGN PTPN22 APLNR STAC2 ADRA2A GEM TMC1 SLN NPPA KCNE3 LIME1 GSTM2
0.00692264	39	597	1.83623	Neutrophil activation	http://amigo.geneontology.org/amigo/term/GO:0042119	FGR CTSA SPI1 FCGR2B LYZ ATP8B4 CD33 BST1 BIN2 QPCT MMP8 A1BG RAB9B TNFAIP6 PREX1 CFP FGL2 CHI3L1 DOCK2 CD36 GLIPR1 SLC15A4 CD53 FCGR2A IQGAP2 DOK3 FCER1G CTSS PTX3 RAB4B FTH1 CXCL8 FPR1 C3AR1 CLEC12A HSPA6 FUCA1 C5AR1 CLEC5A
0.00695515	42	660	1.78872	Myeloid leukocyte mediated immunity	http://amigo.geneontology.org/amigo/term/GO:0002444	FGR CTSA CD84 SPI1 FCGR2B LYZ HMOX1 ATP8B4 CD33 PIK3CG BST1 BIN2 QPCT MMP8 A1BG RAB9B TNFAIP6 CFP FGL2 CHI3L1 DOCK2 CD36 GLIPR1 SLC15A4 CD53 FCGR2A IQGAP2 DOK3 FCER1G CTSS PTX3 RAB4B FTH1 SERPINB9 FPR1 C3AR1 CLEC12A HSPA6 NPPA FUCA1 C5AR1 CLEC5A
0.00695515	41	639	1.80352	Leukocyte degranulation	http://amigo.geneontology.org/amigo/term/GO:0043299	FGR CTSA CD84 SPI1 FCGR2B LYZ HMOX1 ATP8B4 CD33 PIK3CG BST1 BIN2 QPCT MMP8 A1BG RAB9B TNFAIP6 CFP FGL2 CHI3L1 DOCK2 CD36 GLIPR1 SLC15A4 CD53 FCGR2A IQGAP2 DOK3 FCER1G CTSS PTX3 RAB4B FTH1 FPR1 C3AR1 CLEC12A HSPA6 NPPA FUCA1 C5AR1 CLEC5A
0.00695715	36	536	1.88788	Regulation of GTPase activity	http://amigo.geneontology.org/amigo/term/GO:0043087	FAM13B ARHGAP15 GPR137B RGS1 RGS17 CCL7 CCL2 CCL8 APC2 RGS4 PREX1 USP6 ARHGEF6 STARD8 RGN DOCK2 DOCK10 HTR2B PLXNC1 SPRY2 CPEB2 ARHGAP20 GPR65 SLIT2 IQGAP2 FGD2 RASGRP3 CXCL13 ARHGAP25 RANBP3L ALDH1A1 MAPRE2 S1PR1 JUN RGMA PLXNB3
0.00722395	55	942	1.64115	Positive regulation of phosphorus metabolic process	http://amigo.geneontology.org/amigo/term/GO:0010562	FGR PKD1 CD4 CNTN1 HGF LCP2 EDN1 ADCYAP1R1 MT3 P2RX7 CD33 PIK3CG HPX VEGFA GHR FGF1 CD86 PLEK ACVR2A RAMP3 LIF RGN CHI3L1 DUSP26 CAMK1 APLNR CD36 HTR2B SPRY2 EDNRB GPNMB FGF2 PELI2 PIK3R5 GDF7 FGD2 TTBK1 ADRA2A DAB2 MERTK FZD7 SQSTM1 NEK10 VEGFD GPRC5B GPD1 NPNT APLN CLEC7A CLCF1 CDK5R1 CSF1R SOCS3 CLN3 STRADA
0.00722395	55	942	1.64115	Positive regulation of phosphate metabolic process	http://amigo.geneontology.org/amigo/term/GO:0045937	FGR PKD1 CD4 CNTN1 HGF LCP2 EDN1 ADCYAP1R1 MT3 P2RX7 CD33 PIK3CG HPX VEGFA GHR FGF1 CD86 PLEK ACVR2A RAMP3 LIF RGN CHI3L1 DUSP26 CAMK1 APLNR CD36 HTR2B SPRY2 EDNRB GPNMB FGF2 PELI2 PIK3R5 GDF7 FGD2 TTBK1 ADRA2A DAB2 MERTK FZD7 SQSTM1 NEK10 VEGFD GPRC5B GPD1 NPNT APLN CLEC7A CLCF1 CDK5R1 CSF1R SOCS3 CLN3 STRADA
0.00729479	56	965	1.63117	Cytokine-mediated signaling pathway	http://amigo.geneontology.org/amigo/term/GO:0019221	CD4 HGF TNFRSF9 IL17RB SPI1 CAMK2A EDN1 MT3 HMOX1 CSF2RB CXCL12 MAP3K8 CCL7 CCL2 CCL8 HPX SOD2 VEGFA GHR LIFR CD86 IL1R2 GBP1 CSF3R CCRL2 F13A1 LIF LBP PLVAP EDA2R XAF1 CD36 IRF4 IL18BP FGF2 PELI2 ACKR3 SLIT2 PIK3R1 SLA CXCL13 FCER1G CCR5 SQSTM1 CCR1 TNFRSF11B CXCL8 S1PR1 FPR1 CLCF1 SOX2 CSF1R SOCS3 FCGR1B ACKR1 MMP12
0.00729479	93	1817	1.43869	Regulation of cell population proliferation	http://amigo.geneontology.org/amigo/term/GO:0042127	SOX8 SCIN MYO16 TNFRSF9 NTN1 PLPP1 FCGR2B FAP EDN1 LRP2 CD200 HMOX1 BEX4 CD33 CADM4 NAMPT CXCL12 ALDH3A1 CCL2 CCL8 ALOX12 BST1 SOD2 E2F3 NR2E1 VEGFA SPARC FGF1 LIFR CD86 KAT2B ITGA4 SASH3 HP1BP3 LIF RGN PTPN22 APLNR APC HAVCR2 HILPDA HTR2B SERPINE2 SPRY2 EDNRB GPNMB TLR4 SMAD6 CYP1B1 RBP4 FGF2 PROK1 ACKR3 MEGF10 ADRA2A SLC25A27 ABI3BP VSIG4 FZD7 CHRNB2 DISC1 FRZB SGPP2 ESM1 VEGFD FOLR2 FTH1 SHOX2…
0.00729479	24	303	2.22642	Regulation of angiogenesis	http://amigo.geneontology.org/amigo/term/GO:0045765	DCN HGF ADGRA2 HMOX1 NR2E1 VEGFA SPARC FGF1 GADD45A CHI3L1 APLNR SPRY2 GPNMB CYP1B1 FGF2 PROK1 CXCL13 VEGFD MAPK7 COL4A3 CXCL8 C3AR1 PTPRM C5AR1
0.00750354	5	17	8.26721	Cell-cell adhesion mediated by integrin	http://amigo.geneontology.org/amigo/term/GO:0033631	ITGA4 CXCL13 PLPP3 NPNT DPP4
0.00762109	6	26	6.48658	Ionotropic glutamate receptor signaling pathway	http://amigo.geneontology.org/amigo/term/GO:0035235	GRIA2 GRIK4 GRIK2 CDK5R1 CLN3 SULT1A3
0.00773193	9	60	4.21628	Catecholamine secretion	http://amigo.geneontology.org/amigo/term/GO:0050432	CXCL12 SYT6 SYT2 ADRA2A KCNB1 CHRNB2 GRM2 KCNA2 ABAT
0.00803007	8	48	4.68475	Negative regulation of leukocyte migration	http://amigo.geneontology.org/amigo/term/GO:0002686	CD200 HMOX1 CXCL12 CCL2 SLIT2 SLAMF8 APOD DPP4
0.00850379	7	37	5.31783	Dopamine secretion	http://amigo.geneontology.org/amigo/term/GO:0014046	CXCL12 SYT6 SYT2 CHRNB2 GRM2 KCNA2 ABAT
0.00850379	7	37	5.31783	Regulation of dopamine secretion	http://amigo.geneontology.org/amigo/term/GO:0014059	CXCL12 SYT6 SYT2 CHRNB2 GRM2 KCNA2 ABAT
0.00850379	24	307	2.19741	Regulation of vasculature development	http://amigo.geneontology.org/amigo/term/GO:1901342	DCN HGF ADGRA2 HMOX1 NR2E1 VEGFA SPARC FGF1 GADD45A CHI3L1 APLNR SPRY2 GPNMB CYP1B1 FGF2 PROK1 CXCL13 VEGFD MAPK7 COL4A3 CXCL8 C3AR1 PTPRM C5AR1
0.00861153	39	606	1.80896	Granulocyte activation	http://amigo.geneontology.org/amigo/term/GO:0036230	FGR CTSA SPI1 FCGR2B LYZ ATP8B4 CD33 BST1 BIN2 QPCT MMP8 A1BG RAB9B TNFAIP6 PREX1 CFP FGL2 CHI3L1 DOCK2 CD36 GLIPR1 SLC15A4 CD53 FCGR2A IQGAP2 DOK3 FCER1G CTSS PTX3 RAB4B FTH1 CXCL8 FPR1 C3AR1 CLEC12A HSPA6 FUCA1 C5AR1 CLEC5A
0.00907549	8	49	4.58914	Macrophage differentiation	http://amigo.geneontology.org/amigo/term/GO:0030225	CD4 SPI1 VEGFA LIF TSPAN2 C1QC NRROS CSF1R
0.00909443	6	27	6.24634	Dendritic cell chemotaxis	http://amigo.geneontology.org/amigo/term/GO:0002407	SPI1 PIK3CG SLAMF8 CCR5 CCR1 GPR183
0.00909443	6	27	6.24634	Positive regulation of positive chemotaxis	http://amigo.geneontology.org/amigo/term/GO:0050927	CXCL12 VEGFA VEGFD CXCL8 S1PR1 SCG2
0.00912426	46	757	1.70805	Cell junction organization	http://amigo.geneontology.org/amigo/term/GO:0034330	VMP1 NTN1 FCGR2B CTTNBP2 PCDHB4 EPB41L3 CORO2B GLRB VEGFA SPARC CDH6 PCDHB10 PCDHB14 SNAI1 UNC13A CAMK1 APLNR APC DOCK10 PCDH8 CDH11 PIK3R1 NLGN4X PTPRO FZD1 C1QC CHRNB2 DISC1 LRRTM1 DCHS1 MAPRE2 CTNND2 SYNPO GAP43 PEAK1 LRRN1 CDK5R1 CSF1R SLITRK2 CLN3 APOD C5AR1 PCDHGC3 PCDHGC5 PCDHGC4 NEFL
0.00912579	87	1690	1.44701	Cell projection organization	http://amigo.geneontology.org/amigo/term/GO:0030030	SARM1 SCIN GAS7 PKD1 ANOS1 CNTN1 HGF NCDN TRIO MYO16 NTN1 PPP2R5B CAMK2A FCGR2B ACTL6B LRP2 EPB41L3 SEMA5B SNX10 MT3 P2RX7 STX1B CACNG7 HOXA2 CXCL12 PHACTR1 NR2E1 VEGFA ITGA4 PLEK MARK1 GORAB EGR2 PREX1 ARHGEF6 UNC13A POSTN CAMK1 TSPAN2 KIDINS220 APC DOCK10 PLXNC1 SPRY2 CDH11 SYT2 GDF7 SLIT2 PIK3R1 FGD2 PTPRO KIF5A FZD1 CHRNB2 DISC1 BBS5 IQUB MAPK7 GBX2 GFRA2 SHOX2 CTNND2 S1PR1 NPTX1 GAP43 PTPRM …
0.00942041	9	62	4.08027	Regulation of macrophage activation	http://amigo.geneontology.org/amigo/term/GO:0043030	FCGR2B GPR137B CD200 MMP8 LBP HAVCR2 TLR4 TTBK1 VSIG4
0.00942041	5	18	7.80792	Potassium ion export across plasma membrane	http://amigo.geneontology.org/amigo/term/GO:0097623	KCNIP2 KCNE4 NPPA KCNE3 KCNA2
0.0097249	95	1885	1.41661	Cell-cell signaling	http://amigo.geneontology.org/amigo/term/GO:0007267	PKD1 CALCOCO1 HGF NCDN ADGRA2 CAMK2A EDN1 PCDHB4 P2RX7 STX1B CD33 CACNG7 NAMPT CXCL12 CCL7 CCL2 CCL8 GLRB P2RX3 STX2 NR2E1 APC2 PLCL1 MARK1 RGS4 KCNIP2 GRIA2 PCDHB10 PCDHB14 EGR2 TNFAIP6 LIF TMOD2 UNC13A AKAP12 CHRM3 CAMK1 SYT6 DTNA DAGLA APC HILPDA HTR2B SERPINE2 PCDH8 GPNMB RBP4 FGF2 CDH11 SYT2 CXCL14 NLGN4X GRIK4 ADRA2A PTPRO DAB2 MERTK FZD7 SLC24A2 KIF5A CXCL13 FZD1 RNF207 KCNB1 CHRNB2 CCR5 S…
0.0097249	24	311	2.16915	Epithelial cell migration	http://amigo.geneontology.org/amigo/term/GO:0010631	DCN ADGRA2 FAP EDN1 HMOX1 PIK3CG ALOX12 LPXN NR2E1 VEGFA SPARC FGF1 GADD45A CYP1B1 FGF2 SLIT2 CXCL13 PLPP3 MAPRE2 SCG2 PTPRM EVL DPP4 SOX18
0.0097249	18	202	2.50472	Cartilage development	http://amigo.geneontology.org/amigo/term/GO:0051216	SCIN PKD1 EDN1 NKX3-2 MGP GHR DLX2 SNAI1 CHI3L1 SOX5 FGF2 LUM CTSK ACAN PKDCC FRZB SHOX2 CYTL1
0.00986771	13	120	3.04509	Osteoclast differentiation	http://amigo.geneontology.org/amigo/term/GO:0030316	GPR137B SNX10 GPR55 TLR4 TCTA PIK3R1 TMEM178A CCR1 FBN1 GPR183 CSF1R MAFB BGLAP
0.00995708	85	1649	1.44889	Plasma membrane bounded cell projection organization	http://amigo.geneontology.org/amigo/term/GO:0120036	SARM1 GAS7 PKD1 ANOS1 CNTN1 HGF NCDN TRIO MYO16 NTN1 PPP2R5B CAMK2A FCGR2B ACTL6B LRP2 EPB41L3 SEMA5B SNX10 MT3 P2RX7 STX1B CACNG7 HOXA2 CXCL12 PHACTR1 NR2E1 VEGFA ITGA4 PLEK MARK1 GORAB EGR2 PREX1 ARHGEF6 UNC13A POSTN CAMK1 TSPAN2 KIDINS220 APC DOCK10 PLXNC1 CDH11 SYT2 GDF7 SLIT2 PIK3R1 FGD2 PTPRO KIF5A FZD1 CHRNB2 DISC1 BBS5 IQUB MAPK7 GBX2 GFRA2 SHOX2 CTNND2 S1PR1 NPTX1 GAP43 PTPRM CDK5R1 ADAM…
0.0102078	29	409	1.99302	Epithelial cell proliferation	http://amigo.geneontology.org/amigo/term/GO:0050673	HGF FAP HMOX1 CXCL12 CCL2 VEGFA SPARC FGF1 ITGA4 ACVR2A RGN APLNR HTR2B EDNRB TLR4 FGF2 FZD7 SGPP2 VEGFD COL4A3 APLN COL8A2 SCG2 PTPRM AQP11 SOX2 C5AR1 PLXNB3 MMP12
0.0102819	9	63	4.0155	Negative regulation of G protein-coupled receptor signaling pathway	http://amigo.geneontology.org/amigo/term/GO:0045744	APLP1 PLEK RGS4 KLK14 APLNR HTR2B CXCL8 APLN GPRASP1
0.0103487	20	239	2.35218	Regulation of heart contraction	http://amigo.geneontology.org/amigo/term/GO:0008016	CELF2 ABCC9 EDN1 KCND1 CACNG7 PIK3CG ASB3 RGS4 KCNIP2 CHRM3 FXYD6 KCNE4 RNF207 NPR2 SHOX2 APLN NPPA KCNE3 GSTM2 ADORA3
0.0105685	6	28	6.02325	Regulation of positive chemotaxis	http://amigo.geneontology.org/amigo/term/GO:0050926	CXCL12 VEGFA VEGFD CXCL8 S1PR1 SCG2
0.0106965	62	1121	1.55462	Response to organonitrogen compound	http://amigo.geneontology.org/amigo/term/GO:0010243	PDK4 ABCC9 CAMK2A FCGR2B EDN1 P2RX7 RGS17 SRSF5 AQP9 APLP1 NAMPT PIK3CG CXCL12 ALDH3A1 GLRB P2RX3 MAN1A1 GHR SPARC KAT2B ITGA4 RGS4 RAMP3 EGR2 CDO1 CHRM3 PTPN22 APC CD36 HTR2B EDNRB TLR4 CPEB2 SLIT2 PIK3R1 ATP6V1B2 ATP6V0D2 FCER1G CHRNB2 KLF15 GRM2 FOLR2 FBN1 GPD1 NSG2 ATP6V0E2 NPPA UCP3 JUN AQP11 EPM2AIP1 CHRM4 ABAT GPR173 SOCS3 C5AR1 GSTM2 CASTOR1 BGLAP SULT1A3 MMP12 NEFL
0.0106965	31	451	1.93207	Regulation of membrane potential	http://amigo.geneontology.org/amigo/term/GO:0042391	DCN EDN1 P2RX7 STX1B ALOX12 GLRB P2RX3 SOD2 RGS4 KCNIP2 CD36 NLGN4X GRIK4 KCNE4 KCNK13 SLC25A27 RNF207 KCNB1 CHRNB2 GRIK2 GLRX CHRNA9 NPPA KCNE3 KCNA2 JUN ABAT KCNQ3 CLN3 MLLT11 KCTD7
0.0106965	52	897	1.62948	Positive regulation of cell differentiation	http://amigo.geneontology.org/amigo/term/GO:0045597	SOX8 SCIN CD4 HGF NTN1 EDN1 LRP2 NCOA1 OLFM2 CXCL12 ASPA SOD2 CD83 VEGFA GHR CD86 DLX2 ACVR2A SASH3 EGR2 PREX1 SNAI1 LIF CAMK1 SOX5 CD36 SERPINE2 PLXNC1 FGF2 GDF7 NFKBIZ SLIT2 TTBK1 DAB2 ABI3BP PKDCC DISC1 FRZB CCR1 RANBP3L GPRC5B NPNT SHOX2 CLEC7A CLCF1 JUN SOX2 HOXB4 SOCS3 EVI2B PLXNB3 NEFL
0.0106965	31	451	1.93207	Synapse organization	http://amigo.geneontology.org/amigo/term/GO:0050808	NTN1 FCGR2B CTTNBP2 PCDHB4 GLRB SPARC PCDHB10 PCDHB14 UNC13A CAMK1 DOCK10 PCDH8 NLGN4X PTPRO FZD1 C1QC CHRNB2 DISC1 LRRTM1 CTNND2 SYNPO GAP43 LRRN1 CDK5R1 SLITRK2 CLN3 C5AR1 PCDHGC3 PCDHGC5 PCDHGC4 NEFL
0.0106965	73	1373	1.49448	Positive regulation of developmental process	http://amigo.geneontology.org/amigo/term/GO:0051094	SOX8 SCIN CD4 DCN HGF NTN1 EDN1 LRP2 NCOA1 P2RX7 CAPN3 HMOX1 OLFM2 CACNG7 CXCL12 ASPA ALOX12 SOD2 CD83 NR2E1 VEGFA GHR FGF1 CD86 DLX2 ACVR2A SASH3 EGR2 PREX1 SNAI1 LIF UNC13A CHI3L1 CAMK1 SOX5 APLNR CD36 SERPINE2 PLXNC1 CYP1B1 FGF2 CD53 SYT2 GDF7 NFKBIZ SLIT2 TTBK1 DAB2 ABI3BP PKDCC DISC1 FRZB CCR1 RANBP3L VEGFD GPRC5B NPNT SHOX2 CXCL8 C3AR1 CLEC7A CLCF1 LRRN1 JUN SOX2 HOXB4 SOCS3 EVI2B SLITRK2 C…
0.0106965	25	333	2.11025	Calcium ion transmembrane transport	http://amigo.geneontology.org/amigo/term/GO:0070588	PKD1 VMP1 P2RX7 CAPN3 CACNG7 PIK3CG RAMP3 RGN PTPN22 APLNR HTR2B FGF2 STAC2 ADRA2A SLC24A2 MICU3 CCR5 GEM TMC1 SLN CHRNA9 NPPA KCNE3 LIME1 GSTM2
0.0106965	24	314	2.14842	Epithelium migration	http://amigo.geneontology.org/amigo/term/GO:0090132	DCN ADGRA2 FAP EDN1 HMOX1 PIK3CG ALOX12 LPXN NR2E1 VEGFA SPARC FGF1 GADD45A CYP1B1 FGF2 SLIT2 CXCL13 PLPP3 MAPRE2 SCG2 PTPRM EVL DPP4 SOX18
0.0108264	15	154	2.73784	Endothelial cell proliferation	http://amigo.geneontology.org/amigo/term/GO:0001935	HMOX1 CXCL12 CCL2 VEGFA SPARC ITGA4 APLNR HTR2B FGF2 VEGFD COL4A3 APLN SCG2 PTPRM PLXNB3
0.0112161	22	278	2.22441	Regulation of myeloid cell differentiation	http://amigo.geneontology.org/amigo/term/GO:0045637	SCIN CD4 KMT2C SPI1 GPR137B LOX KAT2B CSF3R ACVR2A LIF GPR55 TLR4 TCTA PIK3R1 TMEM178A C1QC CCR1 FBN1 JUN EVI2B MAFB BGLAP
0.0112161	3	5	16.8651	Regulation of retinal ganglion cell axon guidance	http://amigo.geneontology.org/amigo/term/GO:0090259	VEGFA SLIT2 PTPRO
0.0112833	4	11	10.2213	Negative regulation of vascular endothelial growth factor signaling pathway	http://amigo.geneontology.org/amigo/term/GO:1900747	DCN ADGRA2 CADM4 SPRY2
0.0113542	10	78	3.60365	Regulation of osteoclast differentiation	http://amigo.geneontology.org/amigo/term/GO:0045670	GPR137B GPR55 TLR4 TCTA PIK3R1 TMEM178A CCR1 FBN1 MAFB BGLAP
0.011713	25	336	2.09141	Gliogenesis	http://amigo.geneontology.org/amigo/term/GO:0042063	SOX8 VCAN LRP2 MT3 ASPA CCL2 NR2E1 DLX2 EGR2 LIF TSPAN2 SERPINE2 TLR4 FGF2 TTBK1 DISC1 KLF15 GPR183 GAP43 NRROS CLCF1 CDK5R1 SOX2 CSF1R C5AR1
0.0117331	68	1264	1.51217	Positive regulation of transcription by RNA polymerase II	http://amigo.geneontology.org/amigo/term/GO:0045944	SOX8 PKD1 DCN CALCOCO1 HGF KMT2C ZNF112 SPI1 PPP2R5B EDN1 NCOA1 MT3 NAMPT TFEC HOXA2 CDK5RAP3 E2F3 NR2E1 VEGFA FGF1 KAT2B DLX2 ACVR2A EGR2 LIF CAMK1 DMTF1 LMO2 TLR4 IRF4 SMAD6 FGF2 LUM PIK3R1 DAB2 SQSTM1 KLF15 SALL2 MAPK7 ZNF606 GBX2 NPNT LDB2 CAVIN4 CYTL1 S1PR1 APLN NHLH1 BCLAF3 JUN ZNF594 HOXC10 SOX2 RGMA HOXB4 ZNF395 ZNF493 PEG3 MDM4 GLMP SOX18 MAFB MEF2B YY2 ZNF585B MMP12 ZNF224 PAGR1
0.0117368	18	207	2.44422	Morphogenesis of a branching structure	http://amigo.geneontology.org/amigo/term/GO:0001763	SOX8 PKD1 HGF EDN1 VEGFA FGF1 DLX2 RDH10 HOXD11 SPRY2 FGF2 GDF7 SLIT2 DCHS1 GBX2 NPNT SHOX2 SOCS3
0.0117368	32	475	1.89363	Myeloid cell differentiation	http://amigo.geneontology.org/amigo/term/GO:0030099	SCIN CD4 KMT2C SPI1 GPR137B SNX10 CDK5RAP3 VEGFA LOX KAT2B CSF3R ACVR2A PDE1B LIF CASP9 TSPAN2 GPR55 TLR4 IRF4 TCTA PIK3R1 TMEM178A C1QC CCR1 FBN1 GPR183 NRROS JUN CSF1R EVI2B MAFB BGLAP
0.0119066	61	1105	1.55169	Central nervous system development	http://amigo.geneontology.org/amigo/term/GO:0007417	SOX8 KDM7A SCIN PKD1 CNTN1 ADGRA2 TRIO VCAN MYO16 FCGR2B CTTNBP2 ACTL6B LRP2 NCOA1 MT3 APLP1 HOXA2 CXCL12 ASPA CDK5RAP3 PHACTR1 NR2E1 LOXL3 DLX2 RGS4 EGR2 LIF TSPAN2 SERPINE2 TLR4 FGF2 ZIC5 CDH11 SYPL2 GDF7 SLIT2 PAM TTBK1 NLGN4X FZD1 ACAN CHRNB2 DISC1 GBX2 COL3A1 S1PR1 NPTX1 NHLH1 NRROS CLCF1 CDK5R1 AATK SOX2 CSF1R ABAT APOD PCDH18 C5AR1 MAFB NEFL CCDC39
0.012202	40	643	1.74859	Negative regulation of immune system process	http://amigo.geneontology.org/amigo/term/GO:0002683	FGR CD84 SPI1 FCGR2B GPR137B ADCYAP1R1 CD200 HMOX1 CXCL12 CCL2 LPXN CD86 LOXL3 GBP1 RAMP3 FGL2 PTPN22 HAVCR2 GPR55 GPNMB TLR4 FCGR2A TCTA SLIT2 PIK3R1 TMEM178A MERTK SAMSN1 VSIG4 SLAMF8 C1QC FBN1 COL3A1 SERPINB9 GPR27 CD163 APOD DPP4 MAFB MMP12
0.012202	39	622	1.76243	Embryonic morphogenesis	http://amigo.geneontology.org/amigo/term/GO:0048598	SOX8 NTN1 EDN1 LRP2 NCOA1 HOXA2 NKX3-2 ITGA4 DLX2 KCNQ4 MMP8 RDH10 ACVR2A SNAI1 APLNR HTR2B PCDH8 SPRY2 RBP4 FGF2 GDF7 FZD7 RNF207 FRZB BBS5 DACT1 FBN1 MAPK7 GBX2 SHOX2 APLN CHRNA9 SOX2 RGMA HOXB4 SOCS3 SOX18 MAFB CCDC39
0.012202	10	79	3.55804	T cell migration	http://amigo.geneontology.org/amigo/term/GO:0072678	CD200 PIK3CG CXCL12 CCL2 ITGA4 ITGB7 CXCL13 GPR183 S1PR1 APOD
0.0127708	11	94	3.28929	Positive regulation of endothelial cell proliferation	http://amigo.geneontology.org/amigo/term/GO:0001938	HMOX1 CXCL12 VEGFA ITGA4 APLNR HTR2B FGF2 VEGFD APLN SCG2 PLXNB3
0.0127708	22	282	2.19286	Regulation of ion transmembrane transporter activity	http://amigo.geneontology.org/amigo/term/GO:0032412	VMP1 CAMK2A CACNG7 CCL2 KCNIP2 GRIA2 RGN CHRM3 FXYD6 STAC2 ADRA2A KCNE4 RNF207 CTSS GEM SLN GLRX NPPA KCNE3 DAPK1 GSTM2 NEFL
0.0127708	89	1764	1.41817	Transmembrane transport	http://amigo.geneontology.org/amigo/term/GO:0055085	PKD1 MPC1 VMP1 ABCC9 CAMK2A ASIC4 ANO8 SLC25A43 EDN1 LRP2 P2RX7 CAPN3 KCND1 CLCN7 AQP9 CACNG7 PIK3CG KCNT1 CCL2 GLRB P2RX3 KCNQ4 RGS4 KCNIP2 GRIA2 RAMP3 RGN CHRM3 PTPN22 APLNR CD36 HTR2B FXYD6 SLC5A6 SLC40A1 FGF2 SLC15A4 SLC46A3 STAC2 UNC80 SLC26A1 PIK3R1 ATP6V1B2 ATP6V0D2 GRIK4 ADRA2A KCNE4 TMEM163 KCNK13 SLC25A27 SLC24A2 MICU3 STEAP2 RNF207 KCNB1 CHRNB2 CCR5 CTSS SLC15A2 KLF15 GRIK2 SLC13A4 GEM…
0.0127708	14	141	2.79092	Kidney epithelium development	http://amigo.geneontology.org/amigo/term/GO:0072073	SOX8 PKD1 VEGFA FGF1 LIF HOXD11 SMAD6 FGF2 SLIT2 PTPRO KLF15 DCHS1 NPNT AQP11
0.0127708	24	320	2.10814	Tissue migration	http://amigo.geneontology.org/amigo/term/GO:0090130	DCN ADGRA2 FAP EDN1 HMOX1 PIK3CG ALOX12 LPXN NR2E1 VEGFA SPARC FGF1 GADD45A CYP1B1 FGF2 SLIT2 CXCL13 PLPP3 MAPRE2 SCG2 PTPRM EVL DPP4 SOX18
0.0127708	24	320	2.10814	Regulation of leukocyte differentiation	http://amigo.geneontology.org/amigo/term/GO:1902105	CD4 FCGR2B GPR137B CD83 CD86 LOXL3 SASH3 FGL2 LIF GPR55 TLR4 IRF4 NFKBIZ TCTA PIK3R1 TMEM178A SLAMF8 C1QC CCR1 FBN1 JUN EVI2B MAFB BGLAP
0.012777	13	125	2.92328	Macrophage activation	http://amigo.geneontology.org/amigo/term/GO:0042116	FCGR2B GPR137B CD200 NAMPT MMP8 LBP HAVCR2 TLR4 TTBK1 VSIG4 TLR1 C5AR1 SUCNR1
0.0128131	62	1133	1.53815	Animal organ morphogenesis	http://amigo.geneontology.org/amigo/term/GO:0009887	FGR SOX8 PKD1 DCN HGF NTN1 EDN1 LRP2 SNX10 APLP1 HOXA2 CCL2 NKX3-2 MGP STX2 VEGFA GHR FGF1 DLX2 KCNQ4 CSF3R RDH10 SNAI1 LIF HOXD11 SOX5 APLNR HTR2B SPRY2 SMAD6 RBP4 FGF2 GDF7 TMEFF2 SLIT2 PAM DAB2 FZD7 FZD1 ACAN RNF207 FRZB BBS5 TNFRSF11B DACT1 FBN1 DCHS1 GBX2 NPNT SHOX2 S1PR1 COL8A2 PTPRM CHRNA9 CSF1R HOXB4 EVL MDM4 SOX18 MAFB BGLAP CCDC39
0.0128885	17	192	2.48877	Lung development	http://amigo.geneontology.org/amigo/term/GO:0030324	PKD1 VEGFA LOX SPARC FGF1 LOXL3 HSD11B1 RDH10 LIF CHI3L1 SPRY2 RBP4 FGF2 SIM2 PKDCC MMP12 CCDC39
0.0132363	19	228	2.34238	Ear development	http://amigo.geneontology.org/amigo/term/GO:0043583	NTN1 EDN1 HOXA2 NKX3-2 EYA4 SPARC KCNQ4 RDH10 SPRY2 CXCL14 SLC25A27 FRZB TMC1 DCHS1 GBX2 CYTL1 CHRNA9 SOX2 MAFB
0.013411	5	20	7.02713	Copulation	http://amigo.geneontology.org/amigo/term/GO:0007620	ACVR2A KLK14 SERPINE2 EDNRB ABAT
0.013411	5	20	7.02713	Nitric-oxide synthase biosynthetic process	http://amigo.geneontology.org/amigo/term/GO:0051767	EDN1 NAMPT CCL2 AKAP12 TLR4
0.013411	5	20	7.02713	Regulation of nitric-oxide synthase biosynthetic process	http://amigo.geneontology.org/amigo/term/GO:0051769	EDN1 NAMPT CCL2 AKAP12 TLR4
0.0137014	31	461	1.89016	Regulation of hemopoiesis	http://amigo.geneontology.org/amigo/term/GO:1903706	SCIN CD4 KMT2C SPI1 FCGR2B GPR137B CD83 LOX CD86 KAT2B LOXL3 CSF3R ACVR2A SASH3 FGL2 LIF GPR55 TLR4 IRF4 NFKBIZ TCTA PIK3R1 TMEM178A SLAMF8 C1QC CCR1 FBN1 JUN EVI2B MAFB BGLAP
0.0138113	39	628	1.74559	Positive regulation of cytokine production	http://amigo.geneontology.org/amigo/term/GO:0001819	FGR CD4 HGF BTN3A1 P2RX7 CD200 HMOX1 TLR8 PIK3CG CD83 CD86 MMP8 SASH3 LBP AKAP12 CHI3L1 POSTN PTPN22 HAVCR2 CD36 HILPDA HTR2B TLR4 IRF4 CYP1B1 LUM NLRP12 PIK3R1 ADRA2A GBP5 FCER1G GPRC5B C3AR1 CLEC7A TLR1 CSF1R TLR7 C5AR1 MMP12
0.0138431	9	67	3.77577	Aminoglycan catabolic process	http://amigo.geneontology.org/amigo/term/GO:0006026	DCN VCAN CHI3L1 STAB2 FGF2 LUM ACAN FUCA1 PRELP
0.0138431	9	67	3.77577	Interleukin-2 production	http://amigo.geneontology.org/amigo/term/GO:0032623	CD4 CD83 CD86 GBP1 SASH3 HAVCR2 IRF4 VSIG4 CLEC7A
0.0138431	9	67	3.77577	Regulation of interleukin-2 production	http://amigo.geneontology.org/amigo/term/GO:0032663	CD4 CD83 CD86 GBP1 SASH3 HAVCR2 IRF4 VSIG4 CLEC7A
0.0138979	22	285	2.16978	Cell-cell adhesion via plasma-membrane adhesion molecules	http://amigo.geneontology.org/amigo/term/GO:0098742	PKD1 CD84 PCDHB4 CDH6 PCDHB8 PCDHB10 PCDHB14 PCDH8 CDH11 CDHR1 DCHS1 MAPK7 PTPRM SLITRK2 PCDH18 PLXNB3 PCDHGC3 PCDHGC5 PCDHGC4 PCDHGA5 PCDHGA8 PCDHGA10
0.0140112	43	715	1.69044	Tissue morphogenesis	http://amigo.geneontology.org/amigo/term/GO:0048729	SOX8 PKD1 HGF NTN1 EDN1 LRP2 ALOX12 VEGFA FGF1 GORAB RDH10 SNAI1 LIF HOXD11 KLK14 APLNR PCDH8 SPRY2 FGF2 GDF7 TMEFF2 SLIT2 DAB2 FZD7 FZD1 RNF207 FRZB BBS5 DACT1 DCHS1 GBX2 NPNT SHOX2 S1PR1 RGMA CSF1R HOXB4 SOCS3 MDM4 SOX18 CRYGS MMP12 CCDC39
0.0141284	16	177	2.54088	Aminoglycan metabolic process	http://amigo.geneontology.org/amigo/term/GO:0006022	HS3ST1 DCN HGF VCAN HAS3 HS3ST3B1 CHI3L1 STAB2 FGF2 LUM CSGALNACT1 B3GNT7 ACAN CHST2 FUCA1 PRELP
0.0141284	15	160	2.63517	Regulation of G protein-coupled receptor signaling pathway	http://amigo.geneontology.org/amigo/term/GO:0008277	CAMK2A EDN1 RGS1 APLP1 PLEK RGS4 RAMP3 TMOD2 KLK14 APLNR HTR2B CXCL8 GPR27 APLN GPRASP1
0.014347	53	937	1.58992	Cytokine production	http://amigo.geneontology.org/amigo/term/GO:0001816	FGR CD4 HGF BTN3A1 LTBP1 CD84 FCGR2B P2RX7 CD200 HMOX1 TLR8 CD33 PIK3CG BTN3A3 CD83 CD86 IL1R2 GBP1 MMP8 SASH3 LBP AKAP12 CHI3L1 POSTN PTPN22 HAVCR2 CD36 HILPDA HTR2B GPNMB TLR4 IRF4 CYP1B1 LUM NLRP12 PIK3R1 ADRA2A MERTK GBP5 VSIG4 FCER1G GPRC5B C3AR1 CLEC7A NRROS TLR1 CSF1R APOD TLR7 C5AR1 ACKR1 TRIL MMP12
0.014347	4	12	9.3695	Complement receptor mediated signaling pathway	http://amigo.geneontology.org/amigo/term/GO:0002430	FPR1 C3AR1 FPR3 C5AR1
0.014347	4	12	9.3695	Positive regulation of astrocyte differentiation	http://amigo.geneontology.org/amigo/term/GO:0048711	LIF SERPINE2 TTBK1 CLCF1
0.0145166	31	464	1.87794	Regulation of immune effector process	http://amigo.geneontology.org/amigo/term/GO:0002697	FGR CD84 SPI1 FCGR2B HMOX1 HPX CD86 LOXL3 SASH3 CFP FGL2 LBP PTPN22 HAVCR2 CD36 TLR4 IRF4 RBP4 SLC15A4 NFKBIZ VSIG4 SLAMF8 C1QC GPRC5B SERPINB9 C3AR1 CLEC7A NPPA CLCF1 C5AR1 TRIL
0.0145166	14	144	2.73277	Lymphocyte migration	http://amigo.geneontology.org/amigo/term/GO:0072676	CD200 PIK3CG CXCL12 CCL7 CCL2 CCL8 ITGA4 CH25H ITGB7 CXCL14 CXCL13 GPR183 S1PR1 APOD
0.0146826	43	718	1.68338	Response to wounding	http://amigo.geneontology.org/amigo/term/GO:0009611	SARM1 DCN LCP2 FAP EDN1 P2RX7 HMOX1 CADM4 PIK3CG ALOX12 P2RX3 VEGFA LOX SPARC FGF1 PLEK F13A1 POSTN CD36 SERPINE2 TLR4 FGF2 PIK3R5 TMEFF2 PIK3R1 ADRA2A MERTK ABI3BP FZD7 FCER1G PLPP3 CCR1 COL3A1 GAP43 CLEC7A SH2B1 SOX2 RGMA ABAT APOD MMP12 NEFL ADORA3
0.0146826	23	306	2.11273	Regulation of transporter activity	http://amigo.geneontology.org/amigo/term/GO:0032409	VMP1 CAMK2A CACNG7 CCL2 KCNIP2 GRIA2 RGN CHRM3 FXYD6 STAC2 ADRA2A KCNE4 RNF207 CTSS GEM SLN GLRX NPPA KCNE3 DAPK1 GSTM2 KCTD7 NEFL
0.0146826	15	161	2.61881	Regulation of MAP kinase activity	http://amigo.geneontology.org/amigo/term/GO:0043405	EDN1 PIK3CG CDK5RAP3 VEGFA FGF1 PTPN22 HTR2B SPRY2 FGF2 PIK3R5 FGD2 ADRA2A NEK10 NPPA LIME1
0.0149767	17	196	2.43798	Respiratory tube development	http://amigo.geneontology.org/amigo/term/GO:0030323	PKD1 VEGFA LOX SPARC FGF1 LOXL3 HSD11B1 RDH10 LIF CHI3L1 SPRY2 RBP4 FGF2 SIM2 PKDCC MMP12 CCDC39
0.0152158	61	1122	1.52818	Enzyme linked receptor protein signaling pathway	http://amigo.geneontology.org/amigo/term/GO:0007167	FGR PDK4 CD4 ANOS1 DCN HGF ADGRA2 TRIO LCP2 LTBP1 SPI1 PPP2R5B LRP2 MT3 PDGFRL CADM4 LPXN VEGFA GHR LOX FGF1 LIFR NCF2 ACVR2A LIF APC SPRY2 SMAD6 FGF2 GDF7 PIK3R1 ATP6V1B2 ATP6V0D2 ADRA2A DAB2 MERTK SLA NPR2 ESM1 VEGFD FBN1 COL3A1 GFRA2 NPNT COL4A3 HTRA4 ATP6V0E2 APLN NRROS RGMB FGFBP3 NPPA CDK5R1 JUN SH2B1 RGMA CSF1R LRIT3 SOCS3 ZDHHC17 APOD
0.015535	12	113	2.98497	Negative regulation of cellular response to growth factor stimulus	http://amigo.geneontology.org/amigo/term/GO:0090288	DCN ADGRA2 LRP2 CADM4 ACVR2A SPRY2 SMAD6 FGF2 SLIT2 CXCL13 FBN1 APLN
0.0163985	15	163	2.58667	Glycosaminoglycan metabolic process	http://amigo.geneontology.org/amigo/term/GO:0030203	HS3ST1 DCN HGF VCAN HAS3 HS3ST3B1 STAB2 FGF2 LUM CSGALNACT1 B3GNT7 ACAN CHST2 FUCA1 PRELP
0.0166907	12	114	2.95879	Nephron epithelium development	http://amigo.geneontology.org/amigo/term/GO:0072009	SOX8 PKD1 VEGFA FGF1 LIF HOXD11 FGF2 PTPRO KLF15 DCHS1 NPNT AQP11
0.0170583	16	181	2.48473	Positive regulation of protein serine/threonine kinase activity	http://amigo.geneontology.org/amigo/term/GO:0071902	PKD1 EDN1 PIK3CG VEGFA FGF1 CAMK1 HTR2B SPRY2 FGF2 PIK3R5 FGD2 ADRA2A NEK10 CDK5R1 CSF1R STRADA
0.0171017	25	349	2.0135	Regulation of epithelial cell proliferation	http://amigo.geneontology.org/amigo/term/GO:0050678	HMOX1 CXCL12 CCL2 VEGFA SPARC FGF1 ITGA4 RGN APLNR HTR2B EDNRB TLR4 FGF2 FZD7 SGPP2 VEGFD COL4A3 APLN SCG2 PTPRM AQP11 SOX2 C5AR1 PLXNB3 MMP12
0.0171699	11	99	3.12317	Bone remodeling	http://amigo.geneontology.org/amigo/term/GO:0046849	PDK4 NCDN GPR137B SNX10 P2RX7 GPR55 CTSK TNFRSF11B S1PR1 CSF1R BGLAP
0.0171699	10	84	3.34625	Positive chemotaxis	http://amigo.geneontology.org/amigo/term/GO:0050918	HGF CXCL12 VEGFA GPNMB FGF2 VEGFD CXCL8 S1PR1 SCG2 PLXNB3
0.0172889	45	769	1.64484	Negative regulation of cell population proliferation	http://amigo.geneontology.org/amigo/term/GO:0008285	SCIN MYO16 TNFRSF9 PLPP1 FCGR2B FAP CD200 HMOX1 CD33 CCL2 CCL8 SOD2 E2F3 NR2E1 SPARC CD86 KAT2B LIF RGN APC HAVCR2 SERPINE2 SPRY2 GPNMB SMAD6 CYP1B1 RBP4 FGF2 ACKR3 ABI3BP VSIG4 FRZB FTH1 COL4A3 CXCL8 APLN SCG2 PTPRM AQP11 SOX2 CSF1R C1QL4 APOD MDM4 ADORA3
0.017661	12	115	2.93306	Negative regulation of leukocyte differentiation	http://amigo.geneontology.org/amigo/term/GO:1902106	FCGR2B GPR137B LOXL3 FGL2 GPR55 TLR4 TCTA PIK3R1 TMEM178A C1QC FBN1 MAFB
0.0177168	16	182	2.47108	Regulation of endothelial cell migration	http://amigo.geneontology.org/amigo/term/GO:0010594	DCN ADGRA2 EDN1 HMOX1 PIK3CG ALOX12 NR2E1 VEGFA SPARC FGF1 GADD45A FGF2 SLIT2 CXCL13 PLPP3 PTPRM
0.017804	36	576	1.75678	Neutrophil degranulation	http://amigo.geneontology.org/amigo/term/GO:0043312	FGR CTSA SPI1 LYZ ATP8B4 CD33 BST1 BIN2 QPCT MMP8 A1BG RAB9B TNFAIP6 CFP FGL2 CHI3L1 DOCK2 CD36 GLIPR1 SLC15A4 CD53 FCGR2A IQGAP2 DOK3 FCER1G CTSS PTX3 RAB4B FTH1 FPR1 C3AR1 CLEC12A HSPA6 FUCA1 C5AR1 CLEC5A
0.017951	18	218	2.32089	Response to mechanical stimulus	http://amigo.geneontology.org/amigo/term/GO:0009612	PKD1 DCN EDN1 TLR8 CXCL12 P2RX3 GADD45A CHI3L1 POSTN SERPINE2 TLR4 TMC1 COL3A1 CHRNA9 NPPA JUN TLR7 BGLAP
0.0181727	7	44	4.47181	Calcium-dependent cell-cell adhesion via plasma membrane cell adhesion molecules	http://amigo.geneontology.org/amigo/term/GO:0016339	PCDHB4 CDH6 PCDHB10 PCDHB14 CDH11 DCHS1 PCDHGC3
0.0181727	22	293	2.11054	Regulation of transmembrane transporter activity	http://amigo.geneontology.org/amigo/term/GO:0022898	VMP1 CAMK2A CACNG7 CCL2 KCNIP2 GRIA2 RGN CHRM3 FXYD6 STAC2 ADRA2A KCNE4 RNF207 CTSS GEM SLN GLRX NPPA KCNE3 DAPK1 GSTM2 NEFL
0.0186034	4	13	8.64877	Negative regulation of cellular response to vascular endothelial growth factor stimulus	http://amigo.geneontology.org/amigo/term/GO:1902548	DCN ADGRA2 CADM4 SPRY2
0.0187434	49	862	1.59782	Positive regulation of phosphorylation	http://amigo.geneontology.org/amigo/term/GO:0042327	FGR PKD1 CD4 CNTN1 HGF LCP2 EDN1 MT3 P2RX7 PIK3CG HPX VEGFA GHR FGF1 CD86 ACVR2A RAMP3 LIF CHI3L1 CAMK1 APLNR CD36 HTR2B SPRY2 EDNRB GPNMB FGF2 PELI2 PIK3R5 GDF7 FGD2 TTBK1 ADRA2A DAB2 MERTK FZD7 SQSTM1 NEK10 VEGFD GPRC5B GPD1 APLN CLEC7A CLCF1 CDK5R1 CSF1R SOCS3 CLN3 STRADA
0.0187434	5	22	6.3883	Vascular endothelial cell proliferation	http://amigo.geneontology.org/amigo/term/GO:0101023	CCL2 ITGA4 FGF2 COL4A3 APLN
0.0187434	5	22	6.3883	Regulation of vascular endothelial cell proliferation	http://amigo.geneontology.org/amigo/term/GO:1905562	CCL2 ITGA4 FGF2 COL4A3 APLN
0.0189324	52	930	1.57166	Regulation of cytokine production	http://amigo.geneontology.org/amigo/term/GO:0001817	FGR CD4 HGF BTN3A1 LTBP1 CD84 FCGR2B P2RX7 CD200 HMOX1 TLR8 CD33 PIK3CG BTN3A3 CD83 CD86 IL1R2 GBP1 MMP8 SASH3 LBP AKAP12 CHI3L1 POSTN PTPN22 HAVCR2 CD36 HILPDA HTR2B GPNMB TLR4 IRF4 CYP1B1 LUM NLRP12 PIK3R1 ADRA2A MERTK GBP5 VSIG4 FCER1G GPRC5B C3AR1 CLEC7A TLR1 CSF1R APOD TLR7 C5AR1 ACKR1 TRIL MMP12
0.0190935	38	622	1.71724	Positive regulation of response to external stimulus	http://amigo.geneontology.org/amigo/term/GO:0032103	SPI1 EDN1 TLR8 PIK3CG CXCL12 CCL7 HPX VEGFA MMP8 LBP CLEC10A CD180 HAVCR2 TLR4 FGF2 SLC15A4 NLRP12 NFKBIZ SLIT2 CXCL14 PLA2G7 TTBK1 GBP5 CXCL13 FCER1G CCR1 VEGFD GPRC5B CXCL8 S1PR1 C3AR1 SCG2 NPPA CSF1R TLR7 C5AR1 SUCNR1 MMP12
0.0196751	12	117	2.88292	Mucopolysaccharide metabolic process	http://amigo.geneontology.org/amigo/term/GO:1903510	DCN HGF VCAN HAS3 STAB2 FGF2 LUM CSGALNACT1 B3GNT7 ACAN CHST2 PRELP
0.0196751	12	117	2.88292	Negative regulation of hemopoiesis	http://amigo.geneontology.org/amigo/term/GO:1903707	FCGR2B GPR137B LOXL3 FGL2 GPR55 TLR4 TCTA PIK3R1 TMEM178A C1QC FBN1 MAFB
0.0199144	6	33	5.11064	Phagocytosis, recognition	http://amigo.geneontology.org/amigo/term/GO:0006910	LBP CD36 MEGF10 COLEC12 PTX3 CLEC7A
0.0199144	65	1231	1.4842	Response to nitrogen compound	http://amigo.geneontology.org/amigo/term/GO:1901698	PDK4 ABCC9 CAMK2A FCGR2B EDN1 MT3 P2RX7 RGS17 SRSF5 AQP9 APLP1 NAMPT PIK3CG CXCL12 ALDH3A1 GLRB P2RX3 MAN1A1 GHR SPARC KAT2B ITGA4 RGS4 RAMP3 EGR2 CDO1 CHRM3 PTPN22 APC CD36 HTR2B EDNRB TLR4 CPEB2 SLIT2 PIK3R1 ATP6V1B2 ATP6V0D2 COLEC12 FCER1G CHRNB2 KLF15 GRM2 FOLR2 FBN1 GPD1 NSG2 ATP6V0E2 NPPA UCP3 CDK5R1 JUN AQP11 EPM2AIP1 CHRM4 ABAT GPR173 SOCS3 C5AR1 GSTM2 CASTOR1 BGLAP SULT1A3 MMP12 NEFL
0.0200053	33	518	1.7907	Regulation of cell development	http://amigo.geneontology.org/amigo/term/GO:0060284	SOX8 ADGRA2 NTN1 LRP2 SEMA5B MT3 CXCL12 ASPA NR2E1 VEGFA DLX2 GBP1 EGR2 PREX1 LIF POSTN SERPINE2 PLXNC1 EDNRB SLIT2 TTBK1 SLAMF8 NPR2 DISC1 FRZB FBN1 SHOX2 CLEC7A CLCF1 CDK5R1 RGMA PLXNB3 NEFL
0.0209756	21	278	2.1233	Protein kinase B signaling	http://amigo.geneontology.org/amigo/term/GO:0043491	HGF PPP2R5B LRP2 MT3 PIK3CG CCL2 VEGFA LOX FGF1 CD86 RAMP3 CHI3L1 SPRY2 FGF2 PIK3R5 PIK3R1 MERTK GRM2 OTUD3 PLK3 TSPYL5
0.0214996	36	584	1.73272	Neutrophil activation involved in immune response	http://amigo.geneontology.org/amigo/term/GO:0002283	FGR CTSA SPI1 LYZ ATP8B4 CD33 BST1 BIN2 QPCT MMP8 A1BG RAB9B TNFAIP6 CFP FGL2 CHI3L1 DOCK2 CD36 GLIPR1 SLC15A4 CD53 FCGR2A IQGAP2 DOK3 FCER1G CTSS PTX3 RAB4B FTH1 FPR1 C3AR1 CLEC12A HSPA6 FUCA1 C5AR1 CLEC5A
0.0227691	38	629	1.69813	Regulation of leukocyte activation	http://amigo.geneontology.org/amigo/term/GO:0002694	FGR CD4 CD84 SPI1 FCGR2B GPR137B CD200 HMOX1 CD33 MAP3K8 CCL2 BST1 CD83 CD86 LOXL3 MMP8 SASH3 FGL2 LBP PTPN22 HAVCR2 GPNMB TLR4 IRF4 SLC15A4 NFKBIZ PIK3R1 TTBK1 MERTK SAMSN1 VSIG4 SLAMF8 CHRNB2 GPR183 CLEC7A NPPA CLCF1 DPP4
0.0227736	53	962	1.5486	Negative regulation of developmental process	http://amigo.geneontology.org/amigo/term/GO:0051093	SOX8 DCN TRIO PRDM6 NTN1 SPI1 FCGR2B GPR137B SEMA5B CETP MT3 NAMPT HOXA2 NKX3-2 NR2E1 VEGFA SPARC LOXL3 DLX2 GADD45A RGS4 GBP1 SNAI1 FGL2 RGN POSTN GPR55 SPRY2 EDNRB TLR4 SMAD6 RBP4 CTSK TCTA PIK3R1 CXCL14 TMEM178A FZD7 C1QC NPR2 FRZB CCR1 RANBP3L TNFRSF11B FBN1 COL4A3 PTPRM CDK5R1 SOX2 RGMA C1QL4 MAFB LBH
0.0228013	6	34	4.96032	Interferon-alpha production	http://amigo.geneontology.org/amigo/term/GO:0032607	TLR8 PTPN22 HAVCR2 TLR4 TLR7 MMP12
0.0228013	6	34	4.96032	Regulation of interferon-alpha production	http://amigo.geneontology.org/amigo/term/GO:0032647	TLR8 PTPN22 HAVCR2 TLR4 TLR7 MMP12
0.0228013	6	34	4.96032	Positive regulation of cytosolic calcium ion concentration involved in phospholipase C-activating G protein-coupled signaling pathway	http://amigo.geneontology.org/amigo/term/GO:0051482	EDN1 GPR55 LPAR6 GPR65 S1PR1 C3AR1
0.0236159	11	104	2.97302	Amine transport	http://amigo.geneontology.org/amigo/term/GO:0015837	AQP9 CXCL12 RGS4 SYT6 SYT2 ADRA2A KCNB1 CHRNB2 GRM2 KCNA2 ABAT
0.0236159	93	1910	1.36863	Regulation of transport	http://amigo.geneontology.org/amigo/term/GO:0051049	FGR SCIN CD4 CNTN1 VMP1 CD84 SPI1 CAMK2A FCGR2B EDN1 ADCYAP1R1 CETP P2RX7 CD200 CAPN3 STX1B HMOX1 MLC1 KCND1 CD33 CACNG7 PIK3CG CXCL12 CCL2 P2RX3 VEGFA KCNQ4 RGS4 KCNIP2 GRIA2 RAMP3 LIF USP6 RGN CHRM3 CAMK1 SYT6 PTPN22 DOCK2 APLNR CD36 SERPINE2 EDNRB TLR4 FXYD6 RBP4 STAC2 SYT2 PIK3R1 PAM ADRA2A KCNE4 KCNK13 DAB2 MERTK SLC25A27 RNF207 KCNB1 FCER1G CHRNB2 PKDCC CTSS PTX3 CCR1 KLF15 GRM2 GEM TMC1 RA…
0.0241677	56	1034	1.52232	Response to organic cyclic compound	http://amigo.geneontology.org/amigo/term/GO:0014070	CALCOCO1 GRAMD1B PLPP1 ABCC9 EDN1 ADCYAP1R1 NCOA1 P2RX7 MLC1 AQP9 APLP1 NAMPT PIK3CG ALDH3A1 CCL2 P2RX3 SOD2 CD83 NR2E1 GHR LOX SPARC RGS4 RAMP3 CDO1 CASP9 CHRM3 POSTN CD36 HTR2B EDNRB CYP1B1 LUM SLIT2 PAM NR3C2 DAB2 COLEC12 CHRNB2 CCR5 GRM2 FOLR2 GPD1 NSG2 UCP3 FIBIN JUN CHRM4 ABAT GSTM2 LBH BGLAP SULT1A3 EGLN2 NEFL PAGR1
0.02512	55	1013	1.52613	Positive regulation of transport	http://amigo.geneontology.org/amigo/term/GO:0051050	FGR SCIN CNTN1 VMP1 CAMK2A FCGR2B EDN1 ADCYAP1R1 CETP P2RX7 CAPN3 STX1B MLC1 CD33 CXCL12 CCL2 P2RX3 VEGFA KCNIP2 RAMP3 RGN CAMK1 PTPN22 DOCK2 APLNR CD36 EDNRB TLR4 RBP4 STAC2 PIK3R1 ADRA2A DAB2 MERTK RNF207 KCNB1 FCER1G CHRNB2 CTSS PTX3 CCR1 KLF15 MYRIP GPR27 APLN CLEC7A GLRX PLK3 NPPA KCNE3 CDK5R1 ABAT CLN3 GSTM2 KCTD7
0.0251413	12	121	2.78762	Positive regulation of transporter activity	http://amigo.geneontology.org/amigo/term/GO:0032411	VMP1 CCL2 KCNIP2 RGN STAC2 RNF207 CTSS GLRX NPPA KCNE3 GSTM2 KCTD7
0.0257472	72	1411	1.43431	Negative regulation of signal transduction	http://amigo.geneontology.org/amigo/term/GO:0009968	SARM1 DCN HGF ADGRA2 LTBP1 NTN1 SPI1 PPP2R5B FCGR2B LRP2 P2RX7 RGS1 RGS17 HMOX1 APLP1 CADM4 CXCL12 CDK5RAP3 LPXN SOD2 EYA4 APC2 IL1R2 DLX2 PLEK RGS4 GBP1 ACVR2A SNAI1 LIF KLK14 DUSP26 PTPN22 APLNR APC HTR2B SERPINE2 SPRY2 TLR4 IRF4 SMAD6 FGF2 NLRP12 ACKR3 SLIT2 DDIT4L NLGN4X PTPRO DAB2 FRZB ARHGAP25 FBP1 DACT1 FBN1 MAPK7 CXCL8 HTRA4 OTUD3 APLN SCG2 NRROS CHRNA9 NPPA SOX2 SOCS3 C1QL4 TAF9B APOD GP…
0.0261022	6	35	4.8186	Positive regulation of interleukin-2 production	http://amigo.geneontology.org/amigo/term/GO:0032743	CD4 CD83 CD86 SASH3 IRF4 CLEC7A
0.0263636	18	228	2.21909	Osteoblast differentiation	http://amigo.geneontology.org/amigo/term/GO:0001649	SOX8 HGF IBSP VCAN HOXA2 LOX ACVR2A SNAI1 GPNMB SMAD6 FGF2 FZD1 RANBP3L NPNT SHOX2 SOX2 BGLAP CLEC5A
0.0263636	27	404	1.87854	Response to molecule of bacterial origin	http://amigo.geneontology.org/amigo/term/GO:0002237	DCN SPI1 FCGR2B EDN1 CSF2RB CCL2 SOD2 SPARC CD86 PLSCR4 LBP AKAP12 CASP9 CD180 PTPN22 HAVCR2 CD36 EDNRB TLR4 IL18BP SMAD6 CXCL13 CCR5 CXCL8 TLR1 JUN C5AR1
0.0263636	36	593	1.70642	Neutrophil mediated immunity	http://amigo.geneontology.org/amigo/term/GO:0002446	FGR CTSA SPI1 LYZ ATP8B4 CD33 BST1 BIN2 QPCT MMP8 A1BG RAB9B TNFAIP6 CFP FGL2 CHI3L1 DOCK2 CD36 GLIPR1 SLC15A4 CD53 FCGR2A IQGAP2 DOK3 FCER1G CTSS PTX3 RAB4B FTH1 FPR1 C3AR1 CLEC12A HSPA6 FUCA1 C5AR1 CLEC5A
0.0263636	21	285	2.07115	Heart process	http://amigo.geneontology.org/amigo/term/GO:0003015	CELF2 ABCC9 EDN1 KCND1 CACNG7 PIK3CG ASB3 RGS4 KCNIP2 RAMP3 CHRM3 FXYD6 KCNE4 RNF207 NPR2 SHOX2 APLN NPPA KCNE3 GSTM2 ADORA3
0.0263636	8	61	3.68636	Glycosaminoglycan catabolic process	http://amigo.geneontology.org/amigo/term/GO:0006027	DCN VCAN STAB2 FGF2 LUM ACAN FUCA1 PRELP
0.0263636	12	122	2.76477	Bone mineralization	http://amigo.geneontology.org/amigo/term/GO:0030282	FGR IBSP SNX10 P2RX7 MGP LOX ACVR2A GPNMB PKDCC CCR1 S1PR1 BGLAP
0.0263636	3	7	12.0465	Cell chemotaxis to fibroblast growth factor	http://amigo.geneontology.org/amigo/term/GO:0035766	FGF1 FGF2 CXCL13
0.0263636	3	7	12.0465	Endothelial cell chemotaxis to fibroblast growth factor	http://amigo.geneontology.org/amigo/term/GO:0035768	FGF1 FGF2 CXCL13
0.0263636	17	209	2.28634	Phosphatidylinositol-mediated signaling	http://amigo.geneontology.org/amigo/term/GO:0048015	FGR DCN HGF MYO16 PPP2R5B EDN1 PIK3CG VEGFA PLCD4 PLCL1 HTR2B SERPINE2 FGF2 PIK3R5 PIK3R1 CSF1R LIME1
0.0263636	3	7	12.0465	Maintenance of protein location in extracellular region	http://amigo.geneontology.org/amigo/term/GO:0071694	LTBP1 FBN1 NRROS
0.0263636	5	24	5.85594	Positive regulation of neutrophil chemotaxis	http://amigo.geneontology.org/amigo/term/GO:0090023	EDN1 LBP CXCL8 C3AR1 C5AR1
0.0263636	3	7	12.0465	Regulation of potassium ion export across plasma membrane	http://amigo.geneontology.org/amigo/term/GO:1903764	KCNIP2 NPPA KCNE3
0.0263636	3	7	12.0465	Regulation of cell chemotaxis to fibroblast growth factor	http://amigo.geneontology.org/amigo/term/GO:1904847	FGF1 FGF2 CXCL13
0.0263636	3	7	12.0465	Regulation of endothelial cell chemotaxis to fibroblast growth factor	http://amigo.geneontology.org/amigo/term/GO:2000544	FGF1 FGF2 CXCL13
0.0268004	15	174	2.42315	Toll-like receptor signaling pathway	http://amigo.geneontology.org/amigo/term/GO:0002224	SARM1 TLR8 LBP PTPN22 HAVCR2 CD36 TLR4 IRF4 SLC15A4 CTSK COLEC12 CTSS TLR1 TLR7 TRIL
0.026961	7	48	4.09916	Regulation of bone resorption	http://amigo.geneontology.org/amigo/term/GO:0045124	PDK4 GPR137B P2RX7 TNFRSF11B S1PR1 CSF1R BGLAP
0.0273514	9	76	3.32864	Nephron epithelium morphogenesis	http://amigo.geneontology.org/amigo/term/GO:0072088	SOX8 PKD1 VEGFA FGF1 LIF HOXD11 FGF2 DCHS1 NPNT
0.0274747	77	1537	1.40817	Negative regulation of cell communication	http://amigo.geneontology.org/amigo/term/GO:0010648	SARM1 DCN HGF ADGRA2 LTBP1 NTN1 SPI1 PPP2R5B FCGR2B EDN1 LRP2 P2RX7 RGS1 RGS17 HMOX1 APLP1 CADM4 CXCL12 CDK5RAP3 LPXN SOD2 EYA4 APC2 IL1R2 DLX2 PLEK RGS4 GBP1 ACVR2A SNAI1 LIF KLK14 DUSP26 PTPN22 APLNR APC HTR2B SERPINE2 SPRY2 TLR4 IRF4 SMAD6 FGF2 NLRP12 ACKR3 SLIT2 DDIT4L NLGN4X ADRA2A PTPRO DAB2 SLC24A2 KCNB1 FRZB ARHGAP25 GRIK2 FBP1 DACT1 FBN1 MAPK7 CXCL8 HTRA4 OTUD3 APLN SCG2 NRROS CHRNA9 NPP…
0.0277457	53	975	1.52795	Leukocyte mediated immunity	http://amigo.geneontology.org/amigo/term/GO:0002443	FGR SLAMF7 CTSA CD84 SPI1 FCGR2B LYZ HMOX1 TLR8 ATP8B4 CD33 PIK3CG BST1 HPX BIN2 BTN3A3 QPCT MMP8 A1BG SASH3 RAB9B TNFAIP6 CFP FGL2 CHI3L1 DOCK2 HAVCR2 CD36 TLR4 GLIPR1 SLC15A4 CD53 FCGR2A LYST IQGAP2 DOK3 FCER1G C1QC CTSS PTX3 RAB4B FTH1 SERPINB9 FPR1 C3AR1 CLEC7A CLEC12A HSPA6 NPPA CLCF1 FUCA1 C5AR1 CLEC5A
0.0277457	17	211	2.26467	Carbohydrate derivative catabolic process	http://amigo.geneontology.org/amigo/term/GO:1901136	DCN VCAN GALC MAN1A1 PDE8B CHI3L1 NPL STAB2 FGF2 LUM NEIL1 ACAN GPD1 FUCA1 DPYD PRELP MMP12
0.0279683	16	193	2.33024	Morphogenesis of a branching epithelium	http://amigo.geneontology.org/amigo/term/GO:0061138	SOX8 PKD1 HGF EDN1 VEGFA FGF1 RDH10 HOXD11 SPRY2 FGF2 GDF7 SLIT2 DCHS1 GBX2 NPNT SOCS3
0.0283908	6	36	4.68475	Regulation of platelet activation	http://amigo.geneontology.org/amigo/term/GO:0010543	ALOX12 PLEK SERPINE2 TLR4 FCER1G ABAT
0.0285224	77	1540	1.40543	Negative regulation of signaling	http://amigo.geneontology.org/amigo/term/GO:0023057	SARM1 DCN HGF ADGRA2 LTBP1 NTN1 SPI1 PPP2R5B FCGR2B EDN1 LRP2 P2RX7 RGS1 RGS17 HMOX1 APLP1 CADM4 CXCL12 CDK5RAP3 LPXN SOD2 EYA4 APC2 IL1R2 DLX2 PLEK RGS4 GBP1 ACVR2A SNAI1 LIF KLK14 DUSP26 PTPN22 APLNR APC HTR2B SERPINE2 SPRY2 TLR4 IRF4 SMAD6 FGF2 NLRP12 ACKR3 SLIT2 DDIT4L NLGN4X ADRA2A PTPRO DAB2 SLC24A2 KCNB1 FRZB ARHGAP25 GRIK2 FBP1 DACT1 FBN1 MAPK7 CXCL8 HTRA4 OTUD3 APLN SCG2 NRROS CHRNA9 NPP…
0.028667	4	15	7.4956	Toll-like receptor 7 signaling pathway	http://amigo.geneontology.org/amigo/term/GO:0034154	PTPN22 HAVCR2 SLC15A4 TLR7
0.028667	4	15	7.4956	Natural killer cell chemotaxis	http://amigo.geneontology.org/amigo/term/GO:0035747	PIK3CG CCL7 CCL2 CXCL14
0.028667	47	841	1.57087	Positive regulation of hydrolase activity	http://amigo.geneontology.org/amigo/term/GO:0051345	FAM13B ARHGAP15 ADCYAP1R1 RGS1 RGS17 CD200 CD33 CCL7 CCL2 CCL8 ALOX12 VEGFA CD86 APC2 PLEK RGS4 PREX1 USP6 ARHGEF6 STARD8 RGN CASP9 DOCK2 GPR55 DOCK10 HTR2B ARHGAP20 FGF2 GPR65 NLRP12 IQGAP2 TTBK1 RASGRP3 CXCL13 ARHGAP25 RANBP3L ALDH1A1 MAPRE2 NPNT COL4A3 S1PR1 CLEC7A JUN RGMA DIABLO DAPK1 C5AR1
0.0296303	5	25	5.6217	Positive regulation of interferon-alpha production	http://amigo.geneontology.org/amigo/term/GO:0032727	TLR8 PTPN22 TLR4 TLR7 MMP12
0.0296303	5	25	5.6217	Negative regulation of mononuclear cell migration	http://amigo.geneontology.org/amigo/term/GO:0071676	CD200 CCL2 SLIT2 SLAMF8 APOD
0.029836	17	213	2.2434	Inositol lipid-mediated signaling	http://amigo.geneontology.org/amigo/term/GO:0048017	FGR DCN HGF MYO16 PPP2R5B EDN1 PIK3CG VEGFA PLCD4 PLCL1 HTR2B SERPINE2 FGF2 PIK3R5 PIK3R1 CSF1R LIME1
0.0311866	14	160	2.45949	Hindbrain development	http://amigo.geneontology.org/amigo/term/GO:0030902	CNTN1 MYO16 FCGR2B NCOA1 HOXA2 EGR2 SERPINE2 FGF2 NLGN4X GBX2 CDK5R1 ABAT C5AR1 MAFB
0.0311866	84	1716	1.37594	Positive regulation of transcription, DNA-templated	http://amigo.geneontology.org/amigo/term/GO:0045893	SOX8 KDM7A PKD1 CD4 DCN CALCOCO1 HGF KMT2C ZNF112 SPI1 PPP2R5B ACTL6B EDN1 NCOA1 MT3 CAPN3 HAS3 NAMPT TFEC HOXA2 CDK5RAP3 E2F3 NR2E1 VEGFA FGF1 CD86 KAT2B DLX2 ACVR2A EGR2 SNAI1 LIF CAMK1 DMTF1 LMO2 TLR4 IRF4 SMAD6 FGF2 LUM GDF7 PIK3R1 HMBOX1 DAB2 FZD7 FZD1 SQSTM1 KLF15 SALL2 MAPK7 ZNF606 GBX2 NPNT LDB2 CAVIN4 CYTL1 S1PR1 APLN NHLH1 BCLAF3 RGMB JUN ZNF594 HOXC10 SOX2 RGMA HOXB4 TRIM52 ZNF395 ZNF4…
0.0311866	9	78	3.24329	Catecholamine transport	http://amigo.geneontology.org/amigo/term/GO:0051937	CXCL12 SYT6 SYT2 ADRA2A KCNB1 CHRNB2 GRM2 KCNA2 ABAT
0.0311866	24	350	1.92744	Epithelial tube morphogenesis	http://amigo.geneontology.org/amigo/term/GO:0060562	SOX8 PKD1 NTN1 EDN1 LRP2 ALOX12 VEGFA FGF1 RDH10 HOXD11 APLNR SPRY2 FGF2 GDF7 SLIT2 RNF207 BBS5 DCHS1 GBX2 NPNT RGMA CSF1R SOX18 CCDC39
0.0311866	9	78	3.24329	Nephron morphogenesis	http://amigo.geneontology.org/amigo/term/GO:0072028	SOX8 PKD1 VEGFA FGF1 LIF HOXD11 FGF2 DCHS1 NPNT
0.0311866	84	1716	1.37594	Positive regulation of nucleic acid-templated transcription	http://amigo.geneontology.org/amigo/term/GO:1903508	SOX8 KDM7A PKD1 CD4 DCN CALCOCO1 HGF KMT2C ZNF112 SPI1 PPP2R5B ACTL6B EDN1 NCOA1 MT3 CAPN3 HAS3 NAMPT TFEC HOXA2 CDK5RAP3 E2F3 NR2E1 VEGFA FGF1 CD86 KAT2B DLX2 ACVR2A EGR2 SNAI1 LIF CAMK1 DMTF1 LMO2 TLR4 IRF4 SMAD6 FGF2 LUM GDF7 PIK3R1 HMBOX1 DAB2 FZD7 FZD1 SQSTM1 KLF15 SALL2 MAPK7 ZNF606 GBX2 NPNT LDB2 CAVIN4 CYTL1 S1PR1 APLN NHLH1 BCLAF3 RGMB JUN ZNF594 HOXC10 SOX2 RGMA HOXB4 TRIM52 ZNF395 ZNF4…
0.0313732	16	196	2.29457	Positive regulation of epithelial cell proliferation	http://amigo.geneontology.org/amigo/term/GO:0050679	HMOX1 CXCL12 VEGFA FGF1 ITGA4 APLNR HTR2B TLR4 FGF2 FZD7 VEGFD APLN SCG2 C5AR1 PLXNB3 MMP12
0.031452	84	1717	1.37514	Positive regulation of RNA biosynthetic process	http://amigo.geneontology.org/amigo/term/GO:1902680	SOX8 KDM7A PKD1 CD4 DCN CALCOCO1 HGF KMT2C ZNF112 SPI1 PPP2R5B ACTL6B EDN1 NCOA1 MT3 CAPN3 HAS3 NAMPT TFEC HOXA2 CDK5RAP3 E2F3 NR2E1 VEGFA FGF1 CD86 KAT2B DLX2 ACVR2A EGR2 SNAI1 LIF CAMK1 DMTF1 LMO2 TLR4 IRF4 SMAD6 FGF2 LUM GDF7 PIK3R1 HMBOX1 DAB2 FZD7 FZD1 SQSTM1 KLF15 SALL2 MAPK7 ZNF606 GBX2 NPNT LDB2 CAVIN4 CYTL1 S1PR1 APLN NHLH1 BCLAF3 RGMB JUN ZNF594 HOXC10 SOX2 RGMA HOXB4 TRIM52 ZNF395 ZNF4…
0.0315446	21	291	2.02845	Regulation of blood circulation	http://amigo.geneontology.org/amigo/term/GO:1903522	CELF2 ABCC9 EDN1 KCND1 CACNG7 PIK3CG ASB3 RGS4 KCNIP2 CHRM3 FXYD6 ADRA2A KCNE4 RNF207 NPR2 SHOX2 APLN NPPA KCNE3 GSTM2 ADORA3
0.0331854	22	312	1.98201	Renal system development	http://amigo.geneontology.org/amigo/term/GO:0072001	SOX8 PKD1 DCN LRP2 VEGFA FGF1 RDH10 LIF HOXD11 RGN CASP9 SMAD6 RBP4 FGF2 SLIT2 PTPRO KLF15 FBN1 DCHS1 NPNT COL4A3 AQP11
0.0333013	35	583	1.68747	Wound healing	http://amigo.geneontology.org/amigo/term/GO:0042060	DCN LCP2 FAP EDN1 P2RX7 HMOX1 CADM4 PIK3CG ALOX12 P2RX3 VEGFA LOX SPARC FGF1 PLEK F13A1 POSTN CD36 SERPINE2 TLR4 FGF2 PIK3R5 TMEFF2 PIK3R1 ADRA2A MERTK ABI3BP FZD7 FCER1G PLPP3 COL3A1 CLEC7A SH2B1 ABAT MMP12
0.0337836	34	562	1.70051	Response to peptide	http://amigo.geneontology.org/amigo/term/GO:1901652	PDK4 CAMK2A FCGR2B EDN1 SRSF5 NAMPT CXCL12 GHR SPARC KAT2B ITGA4 RAMP3 EGR2 CDO1 PTPN22 APC CD36 EDNRB TLR4 CPEB2 PIK3R1 ATP6V1B2 ATP6V0D2 KLF15 FBN1 ATP6V0E2 NPPA UCP3 EPM2AIP1 GPR173 SOCS3 BGLAP MMP12 NEFL
0.0342533	14	162	2.42913	Branching morphogenesis of an epithelial tube	http://amigo.geneontology.org/amigo/term/GO:0048754	SOX8 PKD1 EDN1 VEGFA FGF1 RDH10 HOXD11 SPRY2 FGF2 GDF7 SLIT2 DCHS1 GBX2 NPNT
0.0342533	14	162	2.42913	Regulation of axonogenesis	http://amigo.geneontology.org/amigo/term/GO:0050770	NTN1 SEMA5B MT3 CXCL12 VEGFA PLXNC1 SLIT2 DISC1 SHOX2 CDK5R1 RGMA KIF13B PLXNB3 NEFL
0.0344963	11	111	2.78553	Glycosaminoglycan biosynthetic process	http://amigo.geneontology.org/amigo/term/GO:0006024	HS3ST1 DCN VCAN HAS3 HS3ST3B1 LUM CSGALNACT1 B3GNT7 ACAN CHST2 PRELP
0.0344963	10	95	2.95879	Astrocyte differentiation	http://amigo.geneontology.org/amigo/term/GO:0048708	SOX8 MT3 NR2E1 LIF TSPAN2 SERPINE2 TLR4 TTBK1 CLCF1 C5AR1
0.0344963	10	95	2.95879	Mesonephric epithelium development	http://amigo.geneontology.org/amigo/term/GO:0072163	SOX8 PKD1 VEGFA FGF1 HOXD11 SMAD6 FGF2 SLIT2 DCHS1 NPNT
0.0344963	10	95	2.95879	Mesonephric tubule development	http://amigo.geneontology.org/amigo/term/GO:0072164	SOX8 PKD1 VEGFA FGF1 HOXD11 SMAD6 FGF2 SLIT2 DCHS1 NPNT
0.0345038	4	16	7.02713	Negative regulation of leukocyte degranulation	http://amigo.geneontology.org/amigo/term/GO:0043301	CD84 SPI1 FCGR2B HMOX1
0.0345038	29	457	1.78369	Positive regulation of GTPase activity	http://amigo.geneontology.org/amigo/term/GO:0043547	FAM13B ARHGAP15 RGS1 RGS17 CCL7 CCL2 CCL8 APC2 RGS4 PREX1 USP6 ARHGEF6 STARD8 RGN DOCK2 DOCK10 HTR2B ARHGAP20 GPR65 IQGAP2 RASGRP3 CXCL13 ARHGAP25 RANBP3L ALDH1A1 MAPRE2 S1PR1 JUN RGMA
0.0345038	4	16	7.02713	Positive regulation of nitric-oxide synthase biosynthetic process	http://amigo.geneontology.org/amigo/term/GO:0051770	NAMPT CCL2 AKAP12 TLR4
0.0345038	4	16	7.02713	Regulation of blood vessel endothelial cell proliferation involved in sprouting angiogenesis	http://amigo.geneontology.org/amigo/term/GO:1903587	HMOX1 VEGFA APLNR FGF2
0.0349145	8	65	3.45951	Negative regulation of cell-substrate adhesion	http://amigo.geneontology.org/amigo/term/GO:0010812	CORO2B GBP1 POSTN PIK3R1 PTPRO FZD7 APOD MMP12
0.0349801	41	718	1.60508	Negative regulation of cell differentiation	http://amigo.geneontology.org/amigo/term/GO:0045596	SOX8 TRIO PRDM6 NTN1 FCGR2B GPR137B SEMA5B CETP MT3 HOXA2 NKX3-2 NR2E1 VEGFA LOXL3 DLX2 RGS4 GBP1 SNAI1 FGL2 POSTN GPR55 SPRY2 EDNRB TLR4 SMAD6 TCTA PIK3R1 CXCL14 TMEM178A FZD7 C1QC NPR2 FRZB RANBP3L FBN1 CDK5R1 SOX2 RGMA C1QL4 MAFB LBH
0.0349801	20	275	2.04426	Heart contraction	http://amigo.geneontology.org/amigo/term/GO:0060047	CELF2 ABCC9 EDN1 KCND1 CACNG7 PIK3CG ASB3 RGS4 KCNIP2 CHRM3 FXYD6 KCNE4 RNF207 NPR2 SHOX2 APLN NPPA KCNE3 GSTM2 ADORA3
0.0352015	9	80	3.16221	Regulation of tissue remodeling	http://amigo.geneontology.org/amigo/term/GO:0034103	PDK4 GPR137B P2RX7 GPNMB ABI3BP TNFRSF11B S1PR1 CSF1R BGLAP
0.0359112	11	112	2.76066	Positive regulation of ion transmembrane transporter activity	http://amigo.geneontology.org/amigo/term/GO:0032414	VMP1 CCL2 KCNIP2 RGN STAC2 RNF207 CTSS GLRX NPPA KCNE3 GSTM2
0.0360045	10	96	2.92797	Positive regulation of MAP kinase activity	http://amigo.geneontology.org/amigo/term/GO:0043406	EDN1 PIK3CG VEGFA FGF1 HTR2B FGF2 PIK3R5 FGD2 ADRA2A NEK10
0.0360045	10	96	2.92797	Regulation of amine transport	http://amigo.geneontology.org/amigo/term/GO:0051952	CXCL12 RGS4 SYT6 SYT2 ADRA2A KCNB1 CHRNB2 GRM2 KCNA2 ABAT
0.0360045	13	146	2.50281	Nephron development	http://amigo.geneontology.org/amigo/term/GO:0072006	SOX8 PKD1 VEGFA FGF1 LIF HOXD11 FGF2 PTPRO KLF15 DCHS1 NPNT COL4A3 AQP11
0.0360045	10	96	2.92797	Nephron tubule development	http://amigo.geneontology.org/amigo/term/GO:0072080	SOX8 PKD1 VEGFA FGF1 LIF HOXD11 FGF2 DCHS1 NPNT AQP11
0.0367544	29	460	1.77206	Embryonic organ development	http://amigo.geneontology.org/amigo/term/GO:0048568	PKD1 NTN1 EDN1 NCOA1 HOXA2 NKX3-2 VEGFA DLX2 KCNQ4 RDH10 SNAI1 LIF APLNR SPRY2 RBP4 RNF207 PKDCC FRZB BBS5 FBN1 GBX2 SHOX2 CXCL8 CHRNA9 HOXB4 SOCS3 SOX18 MAFB CCDC39
0.0369905	54	1017	1.49249	Response to lipid	http://amigo.geneontology.org/amigo/term/GO:0033993	PDK4 DCN CALCOCO1 GRAMD1B SPI1 PLPP1 EDN1 ADCYAP1R1 NCOA1 CSF2RB MLC1 HOXA2 ALDH3A1 CCL2 ALOX12 SOD2 NR2E1 GHR LOX SPARC CD86 PLSCR4 RAMP3 CDO1 LBP AKAP12 CASP9 POSTN CD180 PTPN22 HAVCR2 CD36 EDNRB TLR4 IL18BP SMAD6 RBP4 SLIT2 PAM NR3C2 DAB2 FZD7 CXCL13 CCR5 CXCL8 UCP3 FIBIN JUN C5AR1 LBH BGLAP EGLN2 NEFL PAGR1
0.0371981	71	1418	1.40741	Regulation of hydrolase activity	http://amigo.geneontology.org/amigo/term/GO:0051336	ANOS1 HGF FAM13B PPP2R5B CAMK2A ARHGAP15 GPR137B ADCYAP1R1 MT3 RGS1 RGS17 CD200 CD33 CDK5RAP3 CCL7 CCL2 CCL8 ALOX12 PHACTR1 VEGFA CD86 APC2 PLEK RGS4 CNN3 PREX1 USP6 ARHGEF6 STARD8 RGN CASP9 DOCK2 GPR55 DOCK10 HTR2B SERPINE2 PLXNC1 SPRY2 CPEB2 SYTL2 ARHGAP20 GCHFR FGF2 GPR65 NEIL1 NLRP12 SLIT2 IQGAP2 FGD2 TTBK1 RASGRP3 CXCL13 ARHGAP25 PTX3 RANBP3L ALDH1A1 MAPK7 MAPRE2 NPNT COL4A3 SERPINB9 S1PR1 C…
0.0375459	21	297	1.98747	Receptor-mediated endocytosis	http://amigo.geneontology.org/amigo/term/GO:0006898	FCGR2B LRP2 CACNG7 HPX VEGFA GHR SPARC ITGA4 RAMP3 CD36 HTR2B STAB2 ACKR3 DAB2 COLEC12 FCER1G CXCL8 APLN CD163 CLN3 FCGR1B
0.0375481	43	767	1.57584	Positive regulation of protein phosphorylation	http://amigo.geneontology.org/amigo/term/GO:0001934	PKD1 CD4 CNTN1 HGF LCP2 EDN1 MT3 PIK3CG HPX VEGFA GHR FGF1 CD86 ACVR2A RAMP3 LIF CHI3L1 CAMK1 APLNR CD36 HTR2B SPRY2 EDNRB GPNMB FGF2 PELI2 PIK3R5 GDF7 FGD2 TTBK1 ADRA2A DAB2 SQSTM1 NEK10 VEGFD GPRC5B CLEC7A CLCF1 CDK5R1 CSF1R SOCS3 CLN3 STRADA
0.0375481	11	113	2.73623	Substrate adhesion-dependent cell spreading	http://amigo.geneontology.org/amigo/term/GO:0034446	LPXN ITGA4 GBP1 PREX1 POSTN ITGB7 TMEFF2 PIK3R1 MERTK FZD7 PEAK1
0.0377961	17	220	2.17202	Respiratory system development	http://amigo.geneontology.org/amigo/term/GO:0060541	PKD1 VEGFA LOX SPARC FGF1 LOXL3 HSD11B1 RDH10 LIF CHI3L1 SPRY2 RBP4 FGF2 SIM2 PKDCC MMP12 CCDC39
0.0379858	5	27	5.20528	Positive regulation of granulocyte chemotaxis	http://amigo.geneontology.org/amigo/term/GO:0071624	EDN1 LBP CXCL8 C3AR1 C5AR1
0.0379907	6	39	4.32439	Interleukin-4 production	http://amigo.geneontology.org/amigo/term/GO:0032633	CD83 CD86 SASH3 HAVCR2 IRF4 FCER1G
0.0379907	6	39	4.32439	Regulation of interleukin-4 production	http://amigo.geneontology.org/amigo/term/GO:0032673	CD83 CD86 SASH3 HAVCR2 IRF4 FCER1G
0.0387112	16	202	2.22642	Actomyosin structure organization	http://amigo.geneontology.org/amigo/term/GO:0031032	EDN1 EPB41L3 CAPN3 CORO2B PHACTR1 CNN3 TMOD2 EPB41L4A GPR65 TMEFF2 PIK3R1 S1PR1 FRMD5 SYNPO NEB EVL
0.0391131	17	221	2.16219	Regulation of cell-substrate adhesion	http://amigo.geneontology.org/amigo/term/GO:0010810	CORO2B ECM2 BST1 VEGFA GBP1 PREX1 POSTN CD36 PIK3R1 PTPRO ABI3BP FZD7 DISC1 NPNT PEAK1 APOD MMP12
0.0400906	8	67	3.35624	Heart valve development	http://amigo.geneontology.org/amigo/term/GO:0003170	SNAI1 APLNR SMAD6 SLIT2 DCHS1 SHOX2 NPPA MDM4
0.0409835	25	381	1.84439	Cell-substrate adhesion	http://amigo.geneontology.org/amigo/term/GO:0031589	PKD1 CORO2B ECM2 BST1 LPXN VEGFA ITGA4 GBP1 PREX1 POSTN CD36 SMAD6 ITGB7 TMEFF2 PIK3R1 PTPRO MERTK ABI3BP FZD7 DISC1 COL3A1 NPNT PEAK1 APOD MMP12
0.0409835	25	381	1.84439	Response to lipopolysaccharide	http://amigo.geneontology.org/amigo/term/GO:0032496	DCN SPI1 EDN1 CSF2RB CCL2 SOD2 SPARC CD86 PLSCR4 LBP AKAP12 CASP9 CD180 PTPN22 HAVCR2 CD36 EDNRB TLR4 IL18BP SMAD6 CXCL13 CCR5 CXCL8 JUN C5AR1
0.0412052	43	772	1.56563	Cellular response to nitrogen compound	http://amigo.geneontology.org/amigo/term/GO:1901699	PDK4 CAMK2A FCGR2B EDN1 MT3 P2RX7 SRSF5 AQP9 APLP1 NAMPT PIK3CG P2RX3 GHR KAT2B ITGA4 RGS4 CHRM3 PTPN22 APC CD36 HTR2B TLR4 CPEB2 SLIT2 PIK3R1 ATP6V1B2 ATP6V0D2 COLEC12 CHRNB2 KLF15 FOLR2 FBN1 GPD1 NSG2 ATP6V0E2 CDK5R1 CHRM4 GPR173 SOCS3 GSTM2 CASTOR1 BGLAP SULT1A3
0.0431407	10	99	2.83924	Mesonephros development	http://amigo.geneontology.org/amigo/term/GO:0001823	SOX8 PKD1 VEGFA FGF1 HOXD11 SMAD6 FGF2 SLIT2 DCHS1 NPNT
0.0431407	10	99	2.83924	Renal tubule development	http://amigo.geneontology.org/amigo/term/GO:0061326	SOX8 PKD1 VEGFA FGF1 LIF HOXD11 FGF2 DCHS1 NPNT AQP11
0.0434219	5	28	5.01938	Keratan sulfate biosynthetic process	http://amigo.geneontology.org/amigo/term/GO:0018146	LUM B3GNT7 ACAN CHST2 PRELP
0.0434219	5	28	5.01938	Regulation of astrocyte differentiation	http://amigo.geneontology.org/amigo/term/GO:0048710	NR2E1 LIF SERPINE2 TTBK1 CLCF1
0.0434219	5	28	5.01938	Negative regulation of regulated secretory pathway	http://amigo.geneontology.org/amigo/term/GO:1903306	CD84 SPI1 FCGR2B HMOX1 ADRA2A
0.0435308	18	243	2.08211	Regulation of epithelial cell migration	http://amigo.geneontology.org/amigo/term/GO:0010632	DCN ADGRA2 EDN1 HMOX1 PIK3CG ALOX12 NR2E1 VEGFA SPARC FGF1 GADD45A FGF2 SLIT2 CXCL13 PLPP3 MAPRE2 PTPRM EVL
0.0448124	7	54	3.6437	Dopamine transport	http://amigo.geneontology.org/amigo/term/GO:0015872	CXCL12 SYT6 SYT2 CHRNB2 GRM2 KCNA2 ABAT
0.0451744	21	303	1.94811	Kidney development	http://amigo.geneontology.org/amigo/term/GO:0001822	SOX8 PKD1 DCN LRP2 VEGFA FGF1 RDH10 LIF HOXD11 RGN CASP9 SMAD6 FGF2 SLIT2 PTPRO KLF15 FBN1 DCHS1 NPNT COL4A3 AQP11
0.0454583	9	84	3.01163	Nitric oxide biosynthetic process	http://amigo.geneontology.org/amigo/term/GO:0006809	EDN1 MMP8 RGN CD36 TLR4 GCHFR CYP1B1 PTX3 CLEC7A
0.0454583	70	1409	1.39645	Positive regulation of catalytic activity	http://amigo.geneontology.org/amigo/term/GO:0043085	FGR PKD1 CD4 FAM13B LCP2 ARHGAP15 EDN1 ADCYAP1R1 MT3 RGS1 RGS17 CD200 CD33 PIK3CG CCL7 CCL2 CCL8 ALOX12 VEGFA GHR FGF1 CD86 APC2 PLEK RGS4 PREX1 USP6 ARHGEF6 STARD8 RGN CASP9 CHI3L1 CAMK1 DOCK2 GPR55 DOCK10 HTR2B SPRY2 ARHGAP20 FGF2 GPR65 PIK3R5 NLRP12 IQGAP2 FGD2 TTBK1 HMBOX1 ADRA2A RASGRP3 MERTK CXCL13 ARHGAP25 NEK10 RANBP3L ALDH1A1 MAPRE2 GPRC5B NPNT COL4A3 S1PR1 CLEC7A CDK5R1 JUN EPM2AIP1 RGM…
0.0455695	88	1847	1.33923	Regulation of cell death	http://amigo.geneontology.org/amigo/term/GO:0010941	SARM1 PDK4 SOX8 SCIN HGF TRIO CAMK2A FCGR2B FAP EDN1 ADCYAP1R1 LRP2 NCOA1 MT3 CD200 CAPN3 HMOX1 PIK3CG CXCL12 CCL2 ALOX12 NKX3-2 SOD2 E2F3 EYA4 NR2E1 VEGFA GHR LOX ITGA4 GADD45A RAMP3 PREX1 SNAI1 ARHGEF6 RGN AKAP12 CASP9 APC CD36 HTR2B SPRY2 EDNRB GPNMB TLR4 SMAD6 CYP1B1 FGF2 ADCY10 ACKR3 SLIT2 PIK3R1 FGD2 DAB2 MERTK SLC25A27 KCNB1 SQSTM1 FRZB GRIK2 MAPK7 SERPINB9 GIMAP8 SCG2 CLEC7A SLFN11 PLK3 C…
0.0457008	23	344	1.87935	Regulation of protein serine/threonine kinase activity	http://amigo.geneontology.org/amigo/term/GO:0071900	PKD1 EDN1 PIK3CG CDK5RAP3 VEGFA FGF1 KAT2B GADD45A CAMK1 PTPN22 APC HTR2B SPRY2 FGF2 PIK3R5 FGD2 ADRA2A NEK10 NPPA CDK5R1 CSF1R LIME1 STRADA
0.0461045	18	245	2.06511	Glial cell differentiation	http://amigo.geneontology.org/amigo/term/GO:0010001	SOX8 MT3 ASPA NR2E1 DLX2 EGR2 LIF TSPAN2 SERPINE2 TLR4 FGF2 TTBK1 KLF15 GAP43 NRROS CLCF1 SOX2 C5AR1
0.0461045	8	69	3.25896	Interleukin-10 production	http://amigo.geneontology.org/amigo/term/GO:0032613	HGF FCGR2B CD83 MMP8 SASH3 TLR4 IRF4 CLEC7A
0.0461045	8	69	3.25896	Regulation of interleukin-10 production	http://amigo.geneontology.org/amigo/term/GO:0032653	HGF FCGR2B CD83 MMP8 SASH3 TLR4 IRF4 CLEC7A
0.0461045	18	245	2.06511	Negative regulation of cell activation	http://amigo.geneontology.org/amigo/term/GO:0050866	FGR CD84 SPI1 FCGR2B CD200 HMOX1 ALOX12 CD86 LOXL3 FGL2 PTPN22 HAVCR2 SERPINE2 GPNMB MERTK SAMSN1 VSIG4 ABAT
0.0461045	22	324	1.9086	Negative regulation of cellular component movement	http://amigo.geneontology.org/amigo/term/GO:0051271	DCN CD200 HMOX1 CXCL12 CCL2 GADD45A RGN CYP1B1 FGF2 TMEFF2 SLIT2 PTPRO CXCL13 SLAMF8 COL3A1 FRMD5 PTPRM APOD EVL DPP4 PLXNB3 ADORA3
0.0461045	18	245	2.06511	Developmental growth involved in morphogenesis	http://amigo.geneontology.org/amigo/term/GO:0060560	NTN1 SEMA5B MT3 CACNG7 CXCL12 VEGFA FGF1 ITGA4 RDH10 UNC13A POSTN SPRY2 SYT2 SLIT2 DISC1 S1PR1 CDK5R1 RGMA
0.0464637	26	407	1.79563	Peptidyl-tyrosine phosphorylation	http://amigo.geneontology.org/amigo/term/GO:0018108	FGR CD4 CNTN1 HGF PPP2R5B CADM4 BST1 HPX VEGFA GHR LIF PTPN22 CD36 TTBK1 ADRA2A MERTK SAMSN1 SLA PKDCC GPRC5B CLEC7A PEAK1 CLCF1 AATK CSF1R SOCS3
0.0464643	14	170	2.31482	Phosphatidylinositol 3-kinase signaling	http://amigo.geneontology.org/amigo/term/GO:0014065	FGR DCN HGF MYO16 PPP2R5B EDN1 PIK3CG VEGFA HTR2B SERPINE2 FGF2 PIK3R5 PIK3R1 LIME1
0.0473446	10	101	2.78302	Synaptic transmission, glutamatergic	http://amigo.geneontology.org/amigo/term/GO:0035249	CACNG7 CCL2 GRIA2 UNC13A SERPINE2 GRIK4 DISC1 GRM2 GRIK2 CLN3
0.0473446	3	9	9.3695	Cannabinoid signaling pathway	http://amigo.geneontology.org/amigo/term/GO:0038171	CAMK2A DAGLA GPR55
0.0473446	3	9	9.3695	Positive regulation of mitochondrial depolarization	http://amigo.geneontology.org/amigo/term/GO:0051901	DCN ALOX12 MLLT11
0.0473446	3	9	9.3695	Positive regulation of NLRP3 inflammasome complex assembly	http://amigo.geneontology.org/amigo/term/GO:1900227	CD36 TLR4 GBP5
0.0473446	3	9	9.3695	Positive regulation of blood vessel endothelial cell proliferation involved in sprouting angiogenesis	http://amigo.geneontology.org/amigo/term/GO:1903589	HMOX1 VEGFA APLNR
0.0473704	9	85	2.97619	Production of molecular mediator involved in inflammatory response	http://amigo.geneontology.org/amigo/term/GO:0002532	IL1R2 LBP CD36 TLR4 GBP5 SLAMF8 CLEC7A NPPA APOD
0.0474024	7	55	3.57745	Response to amyloid-beta	http://amigo.geneontology.org/amigo/term/GO:1904645	FCGR2B NAMPT ITGA4 RAMP3 CD36 TLR4 MMP12
0.0474158	11	118	2.62028	Aminoglycan biosynthetic process	http://amigo.geneontology.org/amigo/term/GO:0006023	HS3ST1 DCN VCAN HAS3 HS3ST3B1 LUM CSGALNACT1 B3GNT7 ACAN CHST2 PRELP
0.0474158	4	18	6.24634	Calcium ion-regulated exocytosis of neurotransmitter	http://amigo.geneontology.org/amigo/term/GO:0048791	STX1B UNC13A SYT6 SYT2
0.0474158	22	326	1.89689	Anatomical structure homeostasis	http://amigo.geneontology.org/amigo/term/GO:0060249	PDK4 NCDN GPR137B SNX10 P2RX7 LYZ CAPN3 VEGFA LOX SASH3 GPR55 TLR4 RBP4 CTSK CDHR1 TNFRSF11B LDB2 CYTL1 S1PR1 CSF1R NELL2 BGLAP
0.0474158	39	691	1.58644	Cellular response to organonitrogen compound	http://amigo.geneontology.org/amigo/term/GO:0071417	PDK4 CAMK2A FCGR2B EDN1 P2RX7 SRSF5 AQP9 APLP1 NAMPT PIK3CG P2RX3 GHR KAT2B ITGA4 RGS4 CHRM3 PTPN22 APC CD36 HTR2B TLR4 CPEB2 SLIT2 PIK3R1 ATP6V1B2 ATP6V0D2 KLF15 FOLR2 FBN1 GPD1 NSG2 ATP6V0E2 CHRM4 GPR173 SOCS3 GSTM2 CASTOR1 BGLAP SULT1A3
0.0474158	4	18	6.24634	Positive regulation of reactive oxygen species biosynthetic process	http://amigo.geneontology.org/amigo/term/GO:1903428	SOD2 MMP8 CD36 TLR4
0.0474521	5	29	4.84629	Positive regulation of macrophage activation	http://amigo.geneontology.org/amigo/term/GO:0043032	MMP8 LBP HAVCR2 TLR4 TTBK1
0.0474521	5	29	4.84629	Positive regulation of neutrophil migration	http://amigo.geneontology.org/amigo/term/GO:1902624	EDN1 LBP CXCL8 C3AR1 C5AR1
0.0481266	8	70	3.2124	Positive regulation of gliogenesis	http://amigo.geneontology.org/amigo/term/GO:0014015	SOX8 LRP2 ASPA EGR2 LIF SERPINE2 TTBK1 CLCF1
0.0490524	26	410	1.78249	Peptidyl-tyrosine modification	http://amigo.geneontology.org/amigo/term/GO:0018212	FGR CD4 CNTN1 HGF PPP2R5B CADM4 BST1 HPX VEGFA GHR LIF PTPN22 CD36 TTBK1 ADRA2A MERTK SAMSN1 SLA PKDCC GPRC5B CLEC7A PEAK1 CLCF1 AATK CSF1R SOCS3
0.0490524	21	307	1.92273	Embryonic organ morphogenesis	http://amigo.geneontology.org/amigo/term/GO:0048562	NTN1 EDN1 HOXA2 NKX3-2 DLX2 KCNQ4 RDH10 APLNR SPRY2 RBP4 RNF207 FRZB BBS5 FBN1 GBX2 SHOX2 CHRNA9 HOXB4 SOX18 MAFB CCDC39
0.0494806	23	348	1.85775	Regulation of small GTPase mediated signal transduction	http://amigo.geneontology.org/amigo/term/GO:0051056	FAM13B TRIO ARHGAP15 ADCYAP1R1 CADM4 PIK3CG PREX1 ARHGEF6 STARD8 GPR55 SPRY2 RALGPS1 ARHGAP20 LPAR6 GPR65 SLIT2 FGD2 SQSTM1 ARHGAP25 FBP1 MAPRE2 COL3A1 CAVIN4
0.0498387	34	583	1.63926	Heart development	http://amigo.geneontology.org/amigo/term/GO:0007507	PKD1 EDN1 LRP2 VEGFA LOX SPARC KAT2B RGS4 SNAI1 APLNR HTR2B ALPK3 SMAD6 RBP4 FGF2 SYPL2 SLIT2 PAM ABI3BP FZD7 ACAN RNF207 BBS5 FBN1 DCHS1 COL3A1 SHOX2 S1PR1 APLN NPPA NEB MDM4 SOX18 CCDC39
0.0498387	6	42	4.0155	Positive regulation of glial cell differentiation	http://amigo.geneontology.org/amigo/term/GO:0045687	ASPA EGR2 LIF SERPINE2 TTBK1 CLCF1
0.0505765	2	3	18.739	Pyrimidine nucleobase catabolic process	http://amigo.geneontology.org/amigo/term/GO:0006208	ALDH6A1 DPYD
0.0505765	2	3	18.739	Thymine catabolic process	http://amigo.geneontology.org/amigo/term/GO:0006210	ALDH6A1 DPYD
0.0505765	7	56	3.51356	Positive regulation of calcium ion transport into cytosol	http://amigo.geneontology.org/amigo/term/GO:0010524	ADCYAP1R1 P2RX7 CAPN3 P2RX3 RAMP3 APLNR GSTM2
0.0505765	2	3	18.739	Negative regulation of extracellular matrix disassembly	http://amigo.geneontology.org/amigo/term/GO:0010716	FAP DPP4
0.0505765	2	3	18.739	Peptidoglycan transport	http://amigo.geneontology.org/amigo/term/GO:0015835	SLC15A4 SLC15A2
0.0505765	2	3	18.739	NAD catabolic process	http://amigo.geneontology.org/amigo/term/GO:0019677	SARM1 NUDT17
0.0505765	2	3	18.739	Thymine metabolic process	http://amigo.geneontology.org/amigo/term/GO:0019859	ALDH6A1 DPYD
0.0505765	2	3	18.739	Rhombomere 3 development	http://amigo.geneontology.org/amigo/term/GO:0021569	HOXA2 EGR2
0.0505765	2	3	18.739	Rhombomere 5 development	http://amigo.geneontology.org/amigo/term/GO:0021571	EGR2 MAFB
0.0505765	23	350	1.84713	Negative regulation of locomotion	http://amigo.geneontology.org/amigo/term/GO:0040013	DCN SEMA5B CD200 HMOX1 CXCL12 CCL2 GADD45A RGN CYP1B1 FGF2 TMEFF2 SLIT2 PTPRO CXCL13 SLAMF8 COL3A1 FRMD5 PTPRM APOD EVL DPP4 PLXNB3 ADORA3
0.0505765	2	3	18.739	Histone H3-K27 acetylation	http://amigo.geneontology.org/amigo/term/GO:0043974	SPI1 LIF
0.0505765	2	3	18.739	Apelin receptor signaling pathway	http://amigo.geneontology.org/amigo/term/GO:0060183	APLNR APLN
0.0505765	2	3	18.739	Positive regulation of nucleotide-binding oligomerization domain containing 1 signaling pathway	http://amigo.geneontology.org/amigo/term/GO:0070430	TLR4 SLC15A4
0.0505765	2	3	18.739	Negative regulation of granulocyte chemotaxis	http://amigo.geneontology.org/amigo/term/GO:0071623	SLIT2 DPP4
0.0505765	2	3	18.739	Negative regulation of neutrophil chemotaxis	http://amigo.geneontology.org/amigo/term/GO:0090024	SLIT2 DPP4
0.0505765	2	3	18.739	Regulation of histone H3-K27 acetylation	http://amigo.geneontology.org/amigo/term/GO:1901674	SPI1 LIF
0.0505765	2	3	18.739	Positive regulation of potassium ion export across plasma membrane	http://amigo.geneontology.org/amigo/term/GO:1903766	KCNIP2 NPPA
0.0505765	2	3	18.739	Regulation of membrane repolarization during ventricular cardiac muscle cell action potential	http://amigo.geneontology.org/amigo/term/GO:1905024	RNF207 KCNE3
0.0505765	8	71	3.16716	Regulation of morphogenesis of an epithelium	http://amigo.geneontology.org/amigo/term/GO:1905330	SOX8 HGF ALOX12 VEGFA FGF1 LIF FGF2 RNF207
0.0505814	11	120	2.57661	Regulation of NIK/NF-kappaB signaling	http://amigo.geneontology.org/amigo/term/GO:1901222	SPI1 EDN1 CD86 MMP8 PTPN22 HAVCR2 TLR4 NLRP12 NR3C2 TLR7 LIME1
0.0508111	54	1042	1.45668	Positive regulation of cell population proliferation	http://amigo.geneontology.org/amigo/term/GO:0008284	SOX8 NTN1 EDN1 LRP2 HMOX1 NAMPT CXCL12 ALDH3A1 ALOX12 BST1 E2F3 NR2E1 VEGFA FGF1 LIFR CD86 ITGA4 SASH3 LIF PTPN22 APLNR HAVCR2 HILPDA HTR2B EDNRB TLR4 FGF2 PROK1 MEGF10 ADRA2A SLC25A27 FZD7 CHRNB2 DISC1 ESM1 VEGFD FOLR2 SHOX2 GPR183 S1PR1 APLN SCG2 CLEC7A CLCF1 JUN AQP11 TSPYL5 HOXC10 CSF1R C5AR1 DPP4 PLXNB3 LBH MMP12
0.0508111	16	211	2.13145	Sulfur compound biosynthetic process	http://amigo.geneontology.org/amigo/term/GO:0044272	PDK4 DCN VCAN CDO1 LUM SLC26A1 CSGALNACT1 B3GNT7 ACAN HPGDS MTHFD2L MAT2A GSTA4 CHST2 PRELP GSTM2
0.0508855	9	87	2.90778	Positive regulation of axonogenesis	http://amigo.geneontology.org/amigo/term/GO:0050772	NTN1 CXCL12 VEGFA PLXNC1 SLIT2 DISC1 SHOX2 PLXNB3 NEFL
0.0524628	33	565	1.64174	Multicellular organismal homeostasis	http://amigo.geneontology.org/amigo/term/GO:0048871	PDK4 NCDN GPR137B SNX10 P2RX7 LYZ ALOX12 VEGFA PLCL1 SASH3 APC CD36 GPR55 EDNRB TLR4 IRF4 RBP4 SLC40A1 CTSK CDHR1 TNFRSF11B ALDH1A1 LDB2 SLN CYTL1 S1PR1 APLN KSR2 HOXC10 CSF1R ABAT DIO2 BGLAP
0.0526025	15	193	2.1846	Regulation of blood pressure	http://amigo.geneontology.org/amigo/term/GO:0008217	EDN1 HMOX1 CORO2B NAMPT SOD2 CHRM3 POSTN EDNRB GRIP2 PTPRO NPR2 APLN NPPA ABAT SUCNR1
0.0528574	6	43	3.92212	Positive regulation of interleukin-10 production	http://amigo.geneontology.org/amigo/term/GO:0032733	HGF CD83 SASH3 TLR4 IRF4 CLEC7A
0.0528574	6	43	3.92212	Vascular endothelial growth factor signaling pathway	http://amigo.geneontology.org/amigo/term/GO:0038084	DCN ADGRA2 CADM4 VEGFA SPRY2 VEGFD
0.0528773	7	57	3.45192	Regulation of bone remodeling	http://amigo.geneontology.org/amigo/term/GO:0046850	PDK4 GPR137B P2RX7 TNFRSF11B S1PR1 CSF1R BGLAP
0.0528781	52	998	1.46457	Response to hormone	http://amigo.geneontology.org/amigo/term/GO:0009725	PDK4 CALCOCO1 PLPP1 CAMK2A EDN1 LRP2 NCOA1 MT3 HMOX1 SRSF5 CXCL12 ALDH3A1 NR2E1 GHR LOX SPARC KAT2B RAMP3 EGR2 CDO1 CASP9 APC LMO2 EDNRB CPEB2 SMAD6 SLIT2 PIK3R1 PAM ATP6V1B2 ATP6V0D2 ADRA2A NR3C2 DAB2 STEAP2 CTSS KLF15 TNFRSF11B FBN1 SERPINB9 ATP6V0E2 NPPA UCP3 FIBIN EPM2AIP1 GPR173 SOCS3 LBH BGLAP EGLN2 NEFL PAGR1
0.0535042	4	19	5.91758	Retinal ganglion cell axon guidance	http://amigo.geneontology.org/amigo/term/GO:0031290	VEGFA SLIT2 PTPRO PTPRM
0.0535933	14	175	2.24868	Tissue remodeling	http://amigo.geneontology.org/amigo/term/GO:0048771	PDK4 NCDN GPR137B SNX10 P2RX7 LIF GPR55 GPNMB CTSK ABI3BP TNFRSF11B S1PR1 CSF1R BGLAP
0.0536885	17	232	2.05968	Developmental cell growth	http://amigo.geneontology.org/amigo/term/GO:0048588	NTN1 EDN1 SEMA5B MT3 CACNG7 CXCL12 VEGFA ITGA4 RGS4 UNC13A POSTN SYT2 SLIT2 DISC1 NPPA CDK5R1 RGMA
0.0541239	16	213	2.11144	Lymphocyte activation involved in immune response	http://amigo.geneontology.org/amigo/term/GO:0002285	SPI1 FCGR2B APBB1IP CD86 LOXL3 FGL2 CD180 HAVCR2 DOCK10 TLR4 IRF4 SLC15A4 NFKBIZ FCER1G GPR183 CLCF1
0.0541239	15	194	2.17334	Positive regulation of ion transmembrane transport	http://amigo.geneontology.org/amigo/term/GO:0034767	VMP1 P2RX7 CAPN3 CCL2 KCNIP2 RAMP3 RGN APLNR STAC2 RNF207 CTSS GLRX NPPA KCNE3 GSTM2
0.0556822	10	105	2.677	Regulation of gliogenesis	http://amigo.geneontology.org/amigo/term/GO:0014013	SOX8 LRP2 ASPA NR2E1 DLX2 EGR2 LIF SERPINE2 TTBK1 CLCF1
0.0569368	8	73	3.08038	Lamellipodium assembly	http://amigo.geneontology.org/amigo/term/GO:0030032	ARHGEF6 SLIT2 PIK3R1 PTPRO S1PR1 SH2B1 SPATA13 PLXNB3
0.0574552	9	89	2.84243	Nitric oxide metabolic process	http://amigo.geneontology.org/amigo/term/GO:0046209	EDN1 MMP8 RGN CD36 TLR4 GCHFR CYP1B1 PTX3 CLEC7A
0.0576244	5	31	4.53363	CGMP-mediated signaling	http://amigo.geneontology.org/amigo/term/GO:0019934	CD36 HTR2B EDNRB NPR2 NPPA
0.0576244	3	10	8.43255	Interleukin-18 production	http://amigo.geneontology.org/amigo/term/GO:0032621	CD84 NLRP12 GBP5
0.0576244	3	10	8.43255	Regulation of interleukin-18 production	http://amigo.geneontology.org/amigo/term/GO:0032661	CD84 NLRP12 GBP5
0.0576244	5	31	4.53363	Regulation of fibroblast growth factor receptor signaling pathway	http://amigo.geneontology.org/amigo/term/GO:0040036	SPRY2 FGF2 APLN FGFBP3 LRIT3
0.0576244	3	10	8.43255	Response to lipoteichoic acid	http://amigo.geneontology.org/amigo/term/GO:0070391	LBP CD36 TLR4
0.0576244	25	397	1.77006	Neuron death	http://amigo.geneontology.org/amigo/term/GO:0070997	SARM1 FCGR2B MT3 CD200 HMOX1 NAMPT CCL2 SOD2 GHR CASP9 GPNMB TLR4 SLC25A27 KCNB1 GRIK2 CLCF1 CDK5R1 JUN DIABLO NRBP2 CLN3 C5AR1 SULT1A3 EGLN2 NEFL
0.0576244	3	10	8.43255	Cellular response to lipoteichoic acid	http://amigo.geneontology.org/amigo/term/GO:0071223	LBP CD36 TLR4
0.0583157	10	106	2.65175	Smooth muscle contraction	http://amigo.geneontology.org/amigo/term/GO:0006939	EDN1 P2RX3 CHRM3 HTR2B EDNRB GRIP2 ADRA2A CHRNB2 NPNT ABAT
0.0600186	9	90	2.81085	Monoamine transport	http://amigo.geneontology.org/amigo/term/GO:0015844	CXCL12 SYT6 SYT2 ADRA2A KCNB1 CHRNB2 GRM2 KCNA2 ABAT
0.0600186	8	74	3.03876	Regulation of glial cell differentiation	http://amigo.geneontology.org/amigo/term/GO:0045685	ASPA NR2E1 DLX2 EGR2 LIF SERPINE2 TTBK1 CLCF1
0.0600186	8	74	3.03876	Nephron tubule morphogenesis	http://amigo.geneontology.org/amigo/term/GO:0072078	SOX8 PKD1 VEGFA FGF1 HOXD11 FGF2 DCHS1 NPNT
0.0600186	14	178	2.21078	Positive regulation of cation transmembrane transport	http://amigo.geneontology.org/amigo/term/GO:1904064	VMP1 CAPN3 CCL2 KCNIP2 RAMP3 RGN APLNR STAC2 RNF207 CTSS GLRX NPPA KCNE3 GSTM2
0.0600186	8	74	3.03876	Positive regulation of calcium ion transmembrane transport	http://amigo.geneontology.org/amigo/term/GO:1904427	VMP1 CAPN3 RAMP3 RGN APLNR STAC2 KCNE3 GSTM2
0.0600186	9	90	2.81085	Reactive nitrogen species metabolic process	http://amigo.geneontology.org/amigo/term/GO:2001057	EDN1 MMP8 RGN CD36 TLR4 GCHFR CYP1B1 PTX3 CLEC7A
0.0600186	15	197	2.14024	Regulation of cation channel activity	http://amigo.geneontology.org/amigo/term/GO:2001257	CAMK2A CACNG7 CCL2 KCNIP2 GRIA2 STAC2 KCNE4 RNF207 CTSS GEM NPPA KCNE3 DAPK1 GSTM2 NEFL
0.0603208	53	1031	1.44496	Hemopoiesis	http://amigo.geneontology.org/amigo/term/GO:0030097	SCIN CD4 KMT2C SPI1 FCGR2B GPR137B SNX10 CDK5RAP3 CD83 VEGFA LOX CD86 KAT2B ITGA4 LOXL3 PLEK CSF3R ACVR2A SASH3 PDE1B PREX1 FGL2 LIF CASP9 TSPAN2 PTPN22 DOCK2 LMO2 GPR55 DOCK10 TLR4 IRF4 NFKBIZ TCTA PIK3R1 TMEM178A MERTK FZD7 SLAMF8 FCER1G C1QC CCR1 FBN1 GPR183 KRT75 NRROS CLCF1 JUN CSF1R HOXB4 EVI2B MAFB BGLAP
0.0603208	21	316	1.86797	Negative regulation of cell motility	http://amigo.geneontology.org/amigo/term/GO:2000146	DCN CD200 HMOX1 CXCL12 CCL2 GADD45A RGN CYP1B1 FGF2 TMEFF2 SLIT2 CXCL13 SLAMF8 COL3A1 FRMD5 PTPRM APOD EVL DPP4 PLXNB3 ADORA3
0.0606063	7	59	3.33491	Branching involved in ureteric bud morphogenesis	http://amigo.geneontology.org/amigo/term/GO:0001658	SOX8 VEGFA FGF1 HOXD11 FGF2 DCHS1 NPNT
0.0624004	6	45	3.7478	Mating	http://amigo.geneontology.org/amigo/term/GO:0007618	NCOA1 ACVR2A KLK14 SERPINE2 EDNRB ABAT
0.0624004	6	45	3.7478	Positive regulation of B cell proliferation	http://amigo.geneontology.org/amigo/term/GO:0030890	BST1 SASH3 TLR4 CHRNB2 GPR183 CLCF1
0.064003	5	32	4.39195	Positive regulation of interleukin-4 production	http://amigo.geneontology.org/amigo/term/GO:0032753	CD86 SASH3 HAVCR2 IRF4 FCER1G
0.0640074	8	75	2.99824	Negative regulation of ERK1 and ERK2 cascade	http://amigo.geneontology.org/amigo/term/GO:0070373	GBP1 LIF DUSP26 SPRY2 TLR4 NLRP12 CHRNA9 C1QL4
0.0645183	10	108	2.60264	Positive regulation of endothelial cell migration	http://amigo.geneontology.org/amigo/term/GO:0010595	ADGRA2 EDN1 HMOX1 PIK3CG ALOX12 VEGFA SPARC FGF1 FGF2 PLPP3
0.0651106	17	238	2.00775	Positive regulation of neurogenesis	http://amigo.geneontology.org/amigo/term/GO:0050769	SOX8 NTN1 LRP2 CXCL12 ASPA VEGFA EGR2 LIF SERPINE2 PLXNC1 SLIT2 TTBK1 DISC1 SHOX2 CLCF1 PLXNB3 NEFL
0.0664251	13	162	2.25562	Negative regulation of MAPK cascade	http://amigo.geneontology.org/amigo/term/GO:0043409	P2RX7 CDK5RAP3 GBP1 LIF DUSP26 PTPN22 SPRY2 TLR4 NLRP12 DACT1 CHRNA9 NPPA C1QL4
0.0675842	19	279	1.9142	Tissue homeostasis	http://amigo.geneontology.org/amigo/term/GO:0001894	PDK4 NCDN GPR137B SNX10 P2RX7 LYZ VEGFA SASH3 GPR55 TLR4 RBP4 CTSK CDHR1 TNFRSF11B LDB2 CYTL1 S1PR1 CSF1R BGLAP
0.0675842	9	92	2.74975	Regulation of calcium ion transmembrane transporter activity	http://amigo.geneontology.org/amigo/term/GO:1901019	VMP1 RGN STAC2 ADRA2A GEM SLN NPPA KCNE3 GSTM2
0.0679682	8	76	2.95879	Multicellular organismal response to stress	http://amigo.geneontology.org/amigo/term/GO:0033555	ASIC4 ADCYAP1R1 P2RX3 NR2E1 EDNRB ADRA2A GRIK2 DPP4
0.0679682	6	46	3.66633	Macrophage chemotaxis	http://amigo.geneontology.org/amigo/term/GO:0048246	CCL2 EDNRB SLAMF8 C3AR1 CSF1R C5AR1
0.0679682	6	46	3.66633	Coronary vasculature development	http://amigo.geneontology.org/amigo/term/GO:0060976	LRP2 VEGFA APLNR SMAD6 FGF2 APLN
0.0679682	8	76	2.95879	Regulation of lymphocyte migration	http://amigo.geneontology.org/amigo/term/GO:2000401	CD200 CXCL12 CCL7 CCL2 ITGA4 CXCL14 CXCL13 APOD
0.0679682	8	76	2.95879	Positive regulation of cation channel activity	http://amigo.geneontology.org/amigo/term/GO:2001259	CCL2 KCNIP2 STAC2 RNF207 CTSS NPPA KCNE3 GSTM2
0.0690371	78	1644	1.33362	Regulation of protein modification process	http://amigo.geneontology.org/amigo/term/GO:0031399	FGR PKD1 CD4 CNTN1 HGF LCP2 SPI1 PPP2R5B EDN1 MT3 CAPN3 TLR8 BEX4 CD33 CADM4 PIK3CG CDK5RAP3 BST1 HPX PHACTR1 VEGFA GHR LOX FGF1 CD86 KAT2B PLCL1 GADD45A ACVR2A RWDD3 RAMP3 LIF RGN CHI3L1 DUSP26 CAMK1 PTPN22 APLNR APC CD36 HTR2B SPRY2 EDNRB GPNMB SMAD6 FGF2 PELI2 PIK3R5 NLRP12 GDF7 SLIT2 FGD2 TTBK1 ADRA2A PTPRO DAB2 SAMSN1 SQSTM1 PLPP3 NEK10 KLF15 VEGFD GPRC5B GFRA2 CLEC7A SPSB4 NPPA CLCF1 CDK5R1…
0.0691445	19	280	1.90736	Regulation of peptidyl-tyrosine phosphorylation	http://amigo.geneontology.org/amigo/term/GO:0050730	CD4 CNTN1 HGF PPP2R5B CADM4 BST1 HPX VEGFA GHR LIF PTPN22 CD36 ADRA2A SAMSN1 GPRC5B CLEC7A CLCF1 CSF1R SOCS3
0.0703069	7	61	3.22557	Smooth muscle cell differentiation	http://amigo.geneontology.org/amigo/term/GO:0051145	PRDM6 OLFM2 SOD2 VEGFA APLNR EDNRB NPNT
0.0703069	7	61	3.22557	Macrophage migration	http://amigo.geneontology.org/amigo/term/GO:1905517	CD200 CCL2 EDNRB SLAMF8 C3AR1 CSF1R C5AR1
0.0706821	9	93	2.72018	Monocyte chemotaxis	http://amigo.geneontology.org/amigo/term/GO:0002548	CXCL12 CCL7 CCL2 CCL8 SLIT2 PLA2G7 PTPRO SLAMF8 CCR1
0.0706821	5	33	4.25886	Keratan sulfate metabolic process	http://amigo.geneontology.org/amigo/term/GO:0042339	LUM B3GNT7 ACAN CHST2 PRELP
0.0706821	4	21	5.354	Regulation of nucleotide-binding oligomerization domain containing signaling pathway	http://amigo.geneontology.org/amigo/term/GO:0070424	PTPN22 TLR4 SLC15A4 SLC15A2
0.0706821	4	21	5.354	Regulation of delayed rectifier potassium channel activity	http://amigo.geneontology.org/amigo/term/GO:1902259	KCNE4 RNF207 NPPA KCNE3
0.0706821	4	21	5.354	Regulation of endothelial cell chemotaxis	http://amigo.geneontology.org/amigo/term/GO:2001026	VEGFA FGF1 FGF2 CXCL13
0.0709218	13	164	2.22811	Positive regulation of angiogenesis	http://amigo.geneontology.org/amigo/term/GO:0045766	HGF HMOX1 NR2E1 VEGFA FGF1 CHI3L1 APLNR CYP1B1 FGF2 VEGFD CXCL8 C3AR1 C5AR1
0.0709218	13	164	2.22811	Positive regulation of vasculature development	http://amigo.geneontology.org/amigo/term/GO:1904018	HGF HMOX1 NR2E1 VEGFA FGF1 CHI3L1 APLNR CYP1B1 FGF2 VEGFD CXCL8 C3AR1 C5AR1
0.0709592	15	202	2.08727	Regeneration	http://amigo.geneontology.org/amigo/term/GO:0031099	HGF CAPN3 HMOX1 SRSF5 CPQ CXCL12 RGN POSTN FZD7 GAP43 SOX2 RGMA APOD C5AR1 NEFL
0.0709592	15	202	2.08727	Inner ear development	http://amigo.geneontology.org/amigo/term/GO:0048839	NTN1 EYA4 SPARC KCNQ4 SPRY2 CXCL14 SLC25A27 FRZB TMC1 DCHS1 GBX2 CYTL1 CHRNA9 SOX2 MAFB
0.0709875	3	11	7.66596	Somatic stem cell division	http://amigo.geneontology.org/amigo/term/GO:0048103	FZD7 HOXB4 LBH
0.0709875	3	11	7.66596	Vagina development	http://amigo.geneontology.org/amigo/term/GO:0060068	LRP2 RBP4 MERTK
0.0709875	3	11	7.66596	Positive regulation of membrane depolarization	http://amigo.geneontology.org/amigo/term/GO:1904181	DCN ALOX12 MLLT11
0.0717113	11	128	2.41557	Positive regulation of tumor necrosis factor superfamily cytokine production	http://amigo.geneontology.org/amigo/term/GO:1903557	CD86 MMP8 SASH3 LBP AKAP12 HAVCR2 CD36 TLR4 PIK3R1 CLEC7A TLR1
0.0723952	40	741	1.51733	Response to bacterium	http://amigo.geneontology.org/amigo/term/GO:0009617	FGR CD4 DCN SPI1 FCGR2B EDN1 RGS1 LYZ CSF2RB CCL2 SOD2 SPARC CD86 PLSCR4 CFP LBP AKAP12 CASP9 CD180 PTPN22 HAVCR2 CD36 STAB2 EDNRB TLR4 IL18BP SMAD6 LYST CXCL13 COLEC12 SLAMF8 FCER1G CCR5 LEAP2 VEGFD CXCL8 SERPINB9 TLR1 JUN C5AR1
0.072833	6	47	3.58832	Positive regulation of phospholipase C activity	http://amigo.geneontology.org/amigo/term/GO:0010863	ADCYAP1R1 CD86 GPR55 HTR2B FGF2 C5AR1
0.0733873	54	1069	1.41989	Hematopoietic or lymphoid organ development	http://amigo.geneontology.org/amigo/term/GO:0048534	SCIN CD4 KMT2C SPI1 FCGR2B GPR137B SNX10 CDK5RAP3 NKX3-2 CD83 VEGFA LOX CD86 KAT2B ITGA4 LOXL3 PLEK CSF3R ACVR2A SASH3 PDE1B PREX1 FGL2 LIF CASP9 TSPAN2 PTPN22 DOCK2 LMO2 GPR55 DOCK10 TLR4 IRF4 NFKBIZ TCTA PIK3R1 TMEM178A MERTK FZD7 SLAMF8 FCER1G C1QC CCR1 FBN1 GPR183 KRT75 NRROS CLCF1 JUN CSF1R HOXB4 EVI2B MAFB BGLAP
0.0737017	9	94	2.69124	Ureteric bud development	http://amigo.geneontology.org/amigo/term/GO:0001657	SOX8 VEGFA FGF1 HOXD11 SMAD6 FGF2 SLIT2 DCHS1 NPNT
0.0737017	9	94	2.69124	Adenylate cyclase-inhibiting G protein-coupled receptor signaling pathway	http://amigo.geneontology.org/amigo/term/GO:0007193	EDN1 RGS1 AKAP12 CHRM3 ADRA2A OXER1 GRM2 S1PR1 CHRM4
0.0744738	38	697	1.53246	Regulation of protein kinase activity	http://amigo.geneontology.org/amigo/term/GO:0045859	FGR PKD1 CD4 HGF LCP2 EDN1 MT3 PIK3CG CDK5RAP3 VEGFA GHR FGF1 CD86 KAT2B GADD45A RGN CHI3L1 DUSP26 CAMK1 PTPN22 APC HTR2B SPRY2 FGF2 PIK3R5 FGD2 TTBK1 ADRA2A PTPRO NEK10 GPRC5B NPPA CDK5R1 CSF1R SOCS3 C5AR1 LIME1 STRADA
0.0758022	8	78	2.88292	Renal tubule morphogenesis	http://amigo.geneontology.org/amigo/term/GO:0061333	SOX8 PKD1 VEGFA FGF1 HOXD11 FGF2 DCHS1 NPNT
0.0766684	27	453	1.67534	Regulation of neuron projection development	http://amigo.geneontology.org/amigo/term/GO:0010975	SARM1 CNTN1 HGF NTN1 PPP2R5B SEMA5B MT3 STX1B CXCL12 NR2E1 VEGFA MARK1 PREX1 CAMK1 KIDINS220 PLXNC1 SLIT2 PTPRO FZD1 CHRNB2 DISC1 SHOX2 CDK5R1 RGMA KIF13B PLXNB3 NEFL
0.0772303	18	264	1.91649	Vascular process in circulatory system	http://amigo.geneontology.org/amigo/term/GO:0003018	ABCC9 EDN1 LRP2 SOD2 VEGFA AKAP12 CHRM3 CD36 HTR2B EDNRB SLC5A6 GRIP2 SLIT2 ADRA2A SLC15A2 APLN FGFBP3 NPPA
0.0772303	5	34	4.1336	Activation of phospholipase C activity	http://amigo.geneontology.org/amigo/term/GO:0007202	ADCYAP1R1 CD86 GPR55 HTR2B C5AR1
0.0772303	5	34	4.1336	Respiratory burst	http://amigo.geneontology.org/amigo/term/GO:0045730	PIK3CG NCF2 LBP SLAMF8 CLEC7A
0.0795397	4	22	5.11064	Cartilage condensation	http://amigo.geneontology.org/amigo/term/GO:0001502	PKD1 MGP SOX5 ACAN
0.0795397	22	348	1.77697	Urogenital system development	http://amigo.geneontology.org/amigo/term/GO:0001655	SOX8 PKD1 DCN LRP2 VEGFA FGF1 RDH10 LIF HOXD11 RGN CASP9 SMAD6 RBP4 FGF2 SLIT2 PTPRO KLF15 FBN1 DCHS1 NPNT COL4A3 AQP11
0.0795397	2	4	14.0543	Follicular B cell differentiation	http://amigo.geneontology.org/amigo/term/GO:0002316	SPI1 FCGR2B
0.0795397	2	4	14.0543	Negative regulation of dendritic cell antigen processing and presentation	http://amigo.geneontology.org/amigo/term/GO:0002605	FCGR2B FGL2
0.0795397	4	22	5.11064	Negative regulation of leukocyte chemotaxis	http://amigo.geneontology.org/amigo/term/GO:0002689	CCL2 SLIT2 SLAMF8 DPP4
0.0795397	2	4	14.0543	Regulation of Toll signaling pathway	http://amigo.geneontology.org/amigo/term/GO:0008592	PELI2 NLRP12
0.0795397	2	4	14.0543	Positive regulation of platelet activation	http://amigo.geneontology.org/amigo/term/GO:0010572	PLEK TLR4
0.0795397	2	4	14.0543	Negative regulation of lamellipodium assembly	http://amigo.geneontology.org/amigo/term/GO:0010593	SLIT2 PLXNB3
0.0795397	2	4	14.0543	Microglia development	http://amigo.geneontology.org/amigo/term/GO:0014005	TSPAN2 NRROS
0.0795397	4	22	5.11064	Phasic smooth muscle contraction	http://amigo.geneontology.org/amigo/term/GO:0014821	EDN1 P2RX3 HTR2B EDNRB
0.0795397	2	4	14.0543	Vein smooth muscle contraction	http://amigo.geneontology.org/amigo/term/GO:0014826	EDN1 EDNRB
0.0795397	2	4	14.0543	Pyridine nucleotide catabolic process	http://amigo.geneontology.org/amigo/term/GO:0019364	SARM1 NUDT17
0.0795397	10	113	2.48748	Regulation of chemokine production	http://amigo.geneontology.org/amigo/term/GO:0032642	HMOX1 LBP POSTN HAVCR2 TLR4 CLEC7A CSF1R APOD TLR7 ACKR1
0.0795397	2	4	14.0543	Toll-like receptor 8 signaling pathway	http://amigo.geneontology.org/amigo/term/GO:0034158	TLR8 SLC15A4
0.0795397	17	245	1.95039	Positive regulation of transmembrane transport	http://amigo.geneontology.org/amigo/term/GO:0034764	VMP1 P2RX7 CAPN3 CCL2 KCNIP2 RAMP3 RGN APLNR STAC2 PIK3R1 RNF207 CTSS KLF15 GLRX NPPA KCNE3 GSTM2
0.0795397	7	63	3.12317	Cellular response to vascular endothelial growth factor stimulus	http://amigo.geneontology.org/amigo/term/GO:0035924	DCN ADGRA2 CADM4 VEGFA SPRY2 VEGFD GAS1
0.0795397	24	391	1.72533	Response to decreased oxygen levels	http://amigo.geneontology.org/amigo/term/GO:0036293	EDN1 MT3 HMOX1 NAMPT CXCL12 ALDH3A1 P2RX3 SOD2 VEGFA RWDD3 HP1BP3 POSTN HILPDA CPEB2 PAM CHRNB2 VEGFD PLK3 NPPA UCP3 ABAT DPP4 MDM4 EGLN2
0.0795397	2	4	14.0543	Interleukin-3-mediated signaling pathway	http://amigo.geneontology.org/amigo/term/GO:0038156	CSF2RB FCER1G
0.0795397	9	96	2.63517	Negative regulation of myeloid cell differentiation	http://amigo.geneontology.org/amigo/term/GO:0045638	GPR137B GPR55 TLR4 TCTA PIK3R1 TMEM178A C1QC FBN1 MAFB
0.0795397	71	1488	1.3412	Regulation of immune response	http://amigo.geneontology.org/amigo/term/GO:0050776	FGR SARM1 CD4 SLAMF7 BTN3A1 LCP2 CD84 SPI1 FCGR2B ADCYAP1R1 FYB1 CD200 HMOX1 TLR8 CD33 LPXN HPX BTN3A3 CD86 ITGA4 LOXL3 CD48 GBP1 SASH3 RAMP3 CFP FGL2 LBP CLEC10A PTPN22 HAVCR2 CD36 TLR4 IRF4 SLC15A4 ITGB7 FCGR2A CTSK NFKBIZ PIK3R1 GBP5 SAMSN1 VSIG4 CXCL13 COLEC12 SLAMF8 FCER1G C1QC CTSS SLC15A2 MFAP4 COL3A1 SIGLEC7 SERPINB9 GPR27 FPR1 C3AR1 TLR1 NPPA CLCF1 CD163 JUN SOCS3 FPR3 ZDHHC11 TLR7 C5AR1…
0.0795397	8	79	2.84643	Regulation of synaptic transmission, glutamatergic	http://amigo.geneontology.org/amigo/term/GO:0051966	CACNG7 CCL2 UNC13A SERPINE2 DISC1 GRM2 GRIK2 CLN3
0.0795397	9	96	2.63517	Kidney morphogenesis	http://amigo.geneontology.org/amigo/term/GO:0060993	SOX8 PKD1 VEGFA FGF1 LIF HOXD11 FGF2 DCHS1 NPNT
0.0795397	2	4	14.0543	Regulation of nucleotide-binding oligomerization domain containing 1 signaling pathway	http://amigo.geneontology.org/amigo/term/GO:0070428	TLR4 SLC15A4
0.0795397	10	113	2.48748	Chemical synaptic transmission, postsynaptic	http://amigo.geneontology.org/amigo/term/GO:0099565	P2RX7 STX1B GLRB P2RX3 RGS4 NLGN4X CHRNB2 GRIK2 CHRNA9 ABAT
0.0795397	7	63	3.12317	Export across plasma membrane	http://amigo.geneontology.org/amigo/term/GO:0140115	KCNIP2 SLC40A1 KCNE4 SLC15A2 NPPA KCNE3 KCNA2
0.0795397	4	22	5.11064	Regulation of vascular endothelial growth factor signaling pathway	http://amigo.geneontology.org/amigo/term/GO:1900746	DCN ADGRA2 CADM4 SPRY2
0.0795397	2	4	14.0543	Negative regulation of neutrophil activation	http://amigo.geneontology.org/amigo/term/GO:1902564	SPI1 FCGR2B
0.0795397	2	4	14.0543	Regulation of membrane repolarization during cardiac muscle cell action potential	http://amigo.geneontology.org/amigo/term/GO:1905031	RNF207 KCNE3
0.0795397	2	4	14.0543	Regulation of response to drug	http://amigo.geneontology.org/amigo/term/GO:2001023	NCOA1 GRM2
0.0813067	20	308	1.82523	Phagocytosis	http://amigo.geneontology.org/amigo/term/GO:0006909	FGR FCGR2B CCL2 BIN2 NCF2 LBP DOCK2 CD36 TLR4 FCGR2A LYST PIK3R1 MEGF10 MERTK COLEC12 FCER1G ARHGAP25 PTX3 CLEC7A CLN3
0.082189	5	35	4.0155	Mature B cell differentiation	http://amigo.geneontology.org/amigo/term/GO:0002335	SPI1 FCGR2B DOCK10 SLAMF8 GPR183
0.082189	10	114	2.46566	Chemokine production	http://amigo.geneontology.org/amigo/term/GO:0032602	HMOX1 LBP POSTN HAVCR2 TLR4 CLEC7A CSF1R APOD TLR7 ACKR1
0.082189	6	49	3.44186	Regulation of cell adhesion mediated by integrin	http://amigo.geneontology.org/amigo/term/GO:0033628	PIK3CG LPXN LIF CYP1B1 CXCL13 DPP4
0.082189	6	49	3.44186	Negative regulation of GTPase activity	http://amigo.geneontology.org/amigo/term/GO:0034260	RGN SPRY2 CPEB2 SLIT2 IQGAP2 PLXNB3
0.082189	5	35	4.0155	Regulation of monocyte chemotaxis	http://amigo.geneontology.org/amigo/term/GO:0090025	CXCL12 SLIT2 PLA2G7 SLAMF8 CCR1
0.082189	6	49	3.44186	Regulation of phospholipase C activity	http://amigo.geneontology.org/amigo/term/GO:1900274	ADCYAP1R1 CD86 GPR55 HTR2B FGF2 C5AR1
0.0830991	56	1129	1.39422	Immune system development	http://amigo.geneontology.org/amigo/term/GO:0002520	SCIN CD4 KMT2C SPI1 FCGR2B GPR137B SNX10 CDK5RAP3 NKX3-2 CD83 VEGFA LOX CD86 KAT2B ITGA4 LOXL3 PLEK CSF3R ACVR2A SASH3 PDE1B PREX1 FGL2 LIF CASP9 TSPAN2 PTPN22 DOCK2 HAVCR2 LMO2 GPR55 DOCK10 TLR4 IRF4 SLC15A4 NFKBIZ TCTA PIK3R1 TMEM178A MERTK FZD7 SLAMF8 FCER1G C1QC CCR1 FBN1 GPR183 KRT75 NRROS CLCF1 JUN CSF1R HOXB4 EVI2B MAFB BGLAP
0.0830991	3	12	7.02713	Insemination	http://amigo.geneontology.org/amigo/term/GO:0007320	ACVR2A KLK14 SERPINE2
0.0830991	3	12	7.02713	Phenol-containing compound catabolic process	http://amigo.geneontology.org/amigo/term/GO:0019336	MOXD1 DIO2 SULT1A3
0.0830991	3	12	7.02713	Response to macrophage colony-stimulating factor	http://amigo.geneontology.org/amigo/term/GO:0036005	PDE1B TLR4 CSF1R
0.0830991	3	12	7.02713	Cellular response to macrophage colony-stimulating factor stimulus	http://amigo.geneontology.org/amigo/term/GO:0036006	PDE1B TLR4 CSF1R
0.0830991	3	12	7.02713	Keratan sulfate catabolic process	http://amigo.geneontology.org/amigo/term/GO:0042340	LUM ACAN PRELP
0.0830991	3	12	7.02713	Negative regulation of platelet aggregation	http://amigo.geneontology.org/amigo/term/GO:0090331	ALOX12 SERPINE2 ABAT
0.0830991	3	12	7.02713	Regulation of ATPase-coupled calcium transmembrane transporter activity	http://amigo.geneontology.org/amigo/term/GO:1901894	VMP1 RGN SLN
0.0839134	19	289	1.84796	Positive regulation of nervous system development	http://amigo.geneontology.org/amigo/term/GO:0051962	SOX8 NTN1 LRP2 CXCL12 ASPA VEGFA EGR2 LIF SERPINE2 PLXNC1 SLIT2 TTBK1 DISC1 SHOX2 CLCF1 LRRN1 SLITRK2 PLXNB3 NEFL
0.0844008	13	170	2.14947	Interleukin-6 production	http://amigo.geneontology.org/amigo/term/GO:0032635	HGF CD200 TLR8 MMP8 LBP PTPN22 HAVCR2 CD36 TLR4 NLRP12 CLEC7A TLR1 TLR7
0.0844008	13	170	2.14947	Regulation of interleukin-6 production	http://amigo.geneontology.org/amigo/term/GO:0032675	HGF CD200 TLR8 MMP8 LBP PTPN22 HAVCR2 CD36 TLR4 NLRP12 CLEC7A TLR1 TLR7
0.0847349	27	460	1.64985	Pattern specification process	http://amigo.geneontology.org/amigo/term/GO:0007389	EDN1 LRP2 HOXA2 NKX3-2 FGF1 APC2 DLX2 GORAB ACVR2A EGR2 SNAI1 HOXD11 APLNR APC PCDH8 SMAD6 FGF2 RNF207 SIM2 BBS5 DCHS1 GBX2 HOXB4 HOXC6 SOX18 MAFB CCDC39
0.0847349	10	115	2.44422	Negative regulation of G1/S transition of mitotic cell cycle	http://amigo.geneontology.org/amigo/term/GO:2000134	MYO16 CCL2 GADD45A APC GPNMB DACT1 SLFN11 PLK3 ZC3H12D MDM4
0.0854827	31	549	1.58718	Regulation of body fluid levels	http://amigo.geneontology.org/amigo/term/GO:0050878	LCP2 FAP EDN1 NCOA1 P2RX7 CORO2B PIK3CG ALOX12 P2RX3 VEGFA PLEK F13A1 CDO1 CHRM3 APLNR CD36 SERPINE2 EDNRB TLR4 PIK3R5 PIK3R1 PAM ADRA2A PTPRO MERTK FCER1G COL3A1 APLN SH2B1 ABAT SLC22A4
0.0862719	4	23	4.88844	Blood vessel endothelial cell proliferation involved in sprouting angiogenesis	http://amigo.geneontology.org/amigo/term/GO:0002043	HMOX1 VEGFA APLNR FGF2
0.0862719	35	640	1.53718	Developmental growth	http://amigo.geneontology.org/amigo/term/GO:0048589	NTN1 EDN1 SEMA5B MT3 CAPN3 CPQ CACNG7 CXCL12 VEGFA GHR FGF1 ITGA4 RGS4 RDH10 SASH3 UNC13A POSTN SPRY2 RBP4 FGF2 SYT2 SLIT2 NLGN4X FZD7 PKDCC DISC1 PTX3 S1PR1 GAP43 NPPA CDK5R1 GAS1 SOX2 RGMA APOD
0.0862719	27	461	1.64627	Regulation of nervous system development	http://amigo.geneontology.org/amigo/term/GO:0051960	SOX8 HGF NTN1 LRP2 SEMA5B MT3 CXCL12 ASPA NR2E1 VEGFA DLX2 EGR2 LIF SERPINE2 PLXNC1 SLIT2 TTBK1 DISC1 GBX2 SHOX2 CLCF1 LRRN1 CDK5R1 RGMA SLITRK2 PLXNB3 NEFL
0.0862719	7	65	3.02707	Ureteric bud morphogenesis	http://amigo.geneontology.org/amigo/term/GO:0060675	SOX8 VEGFA FGF1 HOXD11 FGF2 DCHS1 NPNT
0.0862719	4	23	4.88844	Membrane repolarization during cardiac muscle cell action potential	http://amigo.geneontology.org/amigo/term/GO:0086013	KCNIP2 KCNE4 RNF207 KCNE3
0.0868951	43	825	1.46505	Lymphocyte activation	http://amigo.geneontology.org/amigo/term/GO:0046649	FGR CD4 SLAMF7 BTN3A1 SPI1 FCGR2B APBB1IP PIK3CG MAP3K8 CCL2 BST1 CD83 CD86 ITGA4 LOXL3 SASH3 PREX1 FGL2 WDFY4 CD180 PTPN22 DOCK2 HAVCR2 DOCK10 GPNMB TLR4 IRF4 SLC15A4 NFKBIZ PIK3R1 MERTK SAMSN1 VSIG4 FZD7 SLAMF8 FCER1G CHRNB2 GPR183 CLEC7A CLCF1 DPP4 KIF13B MAFB
0.0868951	87	1895	1.29047	Positive regulation of RNA metabolic process	http://amigo.geneontology.org/amigo/term/GO:0051254	SOX8 KDM7A PKD1 CD4 DCN CALCOCO1 HGF KMT2C ZNF112 SPI1 PPP2R5B ACTL6B EDN1 NCOA1 MT3 CAPN3 SRSF5 HAS3 NAMPT TFEC HOXA2 CDK5RAP3 E2F3 NR2E1 VEGFA FGF1 CD86 KAT2B DLX2 ACVR2A EGR2 SNAI1 LIF CAMK1 DMTF1 LMO2 TLR4 IRF4 SMAD6 FGF2 LUM GDF7 PIK3R1 HMBOX1 DAB2 FZD7 FZD1 CELF3 SQSTM1 KLF15 SALL2 MAPK7 ZNF606 GBX2 NPNT LDB2 CAVIN4 CYTL1 S1PR1 APLN NHLH1 BCLAF3 RGMB JUN ZC3H12D ZNF594 HOXC10 SOX2 RGMA HOXB…
0.0869348	6	50	3.37302	Regulation of protein autophosphorylation	http://amigo.geneontology.org/amigo/term/GO:0031952	PPP2R5B VEGFA GPNMB NLRP12 NEK10 GFRA2
0.0869348	6	50	3.37302	Negative regulation of interleukin-6 production	http://amigo.geneontology.org/amigo/term/GO:0032715	HGF CD200 PTPN22 HAVCR2 TLR4 NLRP12
0.0869348	6	50	3.37302	Metal ion export	http://amigo.geneontology.org/amigo/term/GO:0070839	KCNIP2 SLC40A1 KCNE4 NPPA KCNE3 KCNA2
0.0878771	11	134	2.30741	Action potential	http://amigo.geneontology.org/amigo/term/GO:0001508	P2RX3 KCNIP2 CD36 KCNE4 RNF207 KCNB1 CHRNB2 GRIK2 KCNE3 KCNA2 CLN3
0.0882921	5	36	3.90396	Cardiac muscle cell membrane repolarization	http://amigo.geneontology.org/amigo/term/GO:0099622	KCNIP2 KCNE4 RNF207 NPPA KCNE3
0.0889024	14	191	2.06031	Negative regulation of cell development	http://amigo.geneontology.org/amigo/term/GO:0010721	NTN1 SEMA5B MT3 NR2E1 VEGFA DLX2 GBP1 POSTN EDNRB NPR2 FRZB FBN1 CDK5R1 RGMA
0.0889024	14	191	2.06031	Regulation of stress-activated MAPK cascade	http://amigo.geneontology.org/amigo/term/GO:0032872	HGF SPI1 FCGR2B VEGFA GADD45A MMP8 EDA2R PTPN22 TLR4 FZD7 GRIK2 DACT1 CLEC7A NPPA
0.0889589	23	376	1.7194	Response to hypoxia	http://amigo.geneontology.org/amigo/term/GO:0001666	EDN1 MT3 HMOX1 CXCL12 ALDH3A1 P2RX3 SOD2 VEGFA RWDD3 HP1BP3 POSTN HILPDA CPEB2 PAM CHRNB2 VEGFD PLK3 NPPA UCP3 ABAT DPP4 MDM4 EGLN2
0.0896601	8	82	2.74229	B cell activation involved in immune response	http://amigo.geneontology.org/amigo/term/GO:0002312	SPI1 FCGR2B CD180 DOCK10 TLR4 SLC15A4 GPR183 CLCF1
0.0896601	8	82	2.74229	Lymphocyte chemotaxis	http://amigo.geneontology.org/amigo/term/GO:0048247	PIK3CG CCL7 CCL2 CCL8 CH25H CXCL14 CXCL13 GPR183
0.090176	16	231	1.94691	Potassium ion transmembrane transport	http://amigo.geneontology.org/amigo/term/GO:0071805	ABCC9 KCND1 KCNT1 KCNQ4 RGS4 KCNIP2 KCNE4 KCNK13 SLC24A2 RNF207 KCNB1 KCNAB3 NPPA KCNE3 KCNA2 KCNQ3
0.0907897	7	66	2.98121	Vesicle docking	http://amigo.geneontology.org/amigo/term/GO:0048278	STX1B STX2 PLEK UNC13A SYTL2 KCNB1 CLN3
0.0907897	7	66	2.98121	Mesonephric tubule morphogenesis	http://amigo.geneontology.org/amigo/term/GO:0072171	SOX8 VEGFA FGF1 HOXD11 FGF2 DCHS1 NPNT
0.0917102	51	1018	1.40819	Positive regulation of protein modification process	http://amigo.geneontology.org/amigo/term/GO:0031401	PKD1 CD4 CNTN1 HGF LCP2 EDN1 MT3 CD33 PIK3CG CDK5RAP3 HPX VEGFA GHR FGF1 CD86 ACVR2A RWDD3 RAMP3 LIF CHI3L1 DUSP26 CAMK1 PTPN22 APLNR CD36 HTR2B SPRY2 EDNRB GPNMB FGF2 PELI2 PIK3R5 GDF7 FGD2 TTBK1 ADRA2A DAB2 SQSTM1 NEK10 VEGFD GPRC5B CLEC7A SPSB4 CLCF1 CDK5R1 TSPYL5 CSF1R SOCS3 CLN3 FAM47E STRADA
0.0933387	23	378	1.71031	Regulation of neurogenesis	http://amigo.geneontology.org/amigo/term/GO:0050767	SOX8 NTN1 LRP2 SEMA5B MT3 CXCL12 ASPA NR2E1 VEGFA DLX2 EGR2 LIF SERPINE2 PLXNC1 SLIT2 TTBK1 DISC1 SHOX2 CLCF1 CDK5R1 RGMA PLXNB3 NEFL
0.0935563	6	51	3.30688	Regulation of leukocyte degranulation	http://amigo.geneontology.org/amigo/term/GO:0043300	FGR CD84 SPI1 FCGR2B HMOX1 NPPA
0.0941966	22	357	1.73218	Regulation of neuron death	http://amigo.geneontology.org/amigo/term/GO:1901214	SARM1 FCGR2B MT3 CD200 HMOX1 CCL2 SOD2 GHR CASP9 GPNMB TLR4 KCNB1 GRIK2 CLCF1 CDK5R1 JUN NRBP2 CLN3 C5AR1 SULT1A3 EGLN2 NEFL
0.0949377	8	83	2.70925	Positive regulation of NIK/NF-kappaB signaling	http://amigo.geneontology.org/amigo/term/GO:1901224	EDN1 CD86 MMP8 HAVCR2 TLR4 NLRP12 NR3C2 TLR7
0.0963053	10	118	2.38208	Negative regulation of cell cycle G1/S phase transition	http://amigo.geneontology.org/amigo/term/GO:1902807	MYO16 CCL2 GADD45A APC GPNMB DACT1 SLFN11 PLK3 ZC3H12D MDM4
0.0964769	4	24	4.68475	Response to superoxide	http://amigo.geneontology.org/amigo/term/GO:0000303	MT3 SOD2 CD36 UCP3
0.0964769	40	762	1.47551	Transmembrane receptor protein tyrosine kinase signaling pathway	http://amigo.geneontology.org/amigo/term/GO:0007169	FGR PDK4 CD4 ANOS1 DCN HGF ADGRA2 LCP2 PPP2R5B MT3 PDGFRL CADM4 VEGFA GHR LOX FGF1 NCF2 APC SPRY2 FGF2 PIK3R1 ATP6V1B2 ATP6V0D2 ADRA2A MERTK SLA ESM1 VEGFD GFRA2 COL4A3 ATP6V0E2 APLN FGFBP3 CDK5R1 SH2B1 CSF1R LRIT3 SOCS3 ZDHHC17 APOD
0.0964769	5	37	3.79845	Monocyte differentiation	http://amigo.geneontology.org/amigo/term/GO:0030224	CD4 VEGFA PDE1B JUN CSF1R
0.0964769	4	24	4.68475	Regulation of cellular response to vascular endothelial growth factor stimulus	http://amigo.geneontology.org/amigo/term/GO:1902547	DCN ADGRA2 CADM4 SPRY2
0.0965701	7	67	2.93671	Regulation of B cell proliferation	http://amigo.geneontology.org/amigo/term/GO:0030888	FCGR2B BST1 SASH3 TLR4 CHRNB2 GPR183 CLCF1
0.0973988	23	380	1.7013	Ras protein signal transduction	http://amigo.geneontology.org/amigo/term/GO:0007265	NTN1 CADM4 PIK3CG RAB9B STARD8 GPR55 SPRY2 RALGPS1 FGF2 LPAR6 GPR65 DOK3 ADRA2A RASGRP3 SQSTM1 FBP1 MAPRE2 RAB4B COL3A1 CAVIN4 KSR2 JUN ERAS
0.0978121	14	194	2.02845	Temperature homeostasis	http://amigo.geneontology.org/amigo/term/GO:0001659	VEGFA PLCL1 APC CD36 EDNRB TLR4 IRF4 ALDH1A1 SLN APLN KSR2 HOXC10 ABAT DIO2
0.0978121	3	13	6.48658	Respiratory burst involved in defense response	http://amigo.geneontology.org/amigo/term/GO:0002679	PIK3CG LBP SLAMF8
0.0978121	3	13	6.48658	Trophoblast giant cell differentiation	http://amigo.geneontology.org/amigo/term/GO:0060707	SNAI1 LIF SOCS3
0.0978121	14	194	2.02845	Regulation of stress-activated protein kinase signaling cascade	http://amigo.geneontology.org/amigo/term/GO:0070302	HGF SPI1 FCGR2B VEGFA GADD45A MMP8 EDA2R PTPN22 TLR4 FZD7 GRIK2 DACT1 CLEC7A NPPA
0.0978121	3	13	6.48658	Regulation of natural killer cell chemotaxis	http://amigo.geneontology.org/amigo/term/GO:2000501	CCL7 CCL2 CXCL14
0.0985944	30	535	1.57618	Regulation of anatomical structure size	http://amigo.geneontology.org/amigo/term/GO:0090066	SCIN NTN1 EDN1 SEMA5B MT3 P2RX7 CXCL12 SOD2 VEGFA PLEK PREX1 HP1BP3 TMOD2 CHRM3 HTR2B EDNRB GRIP2 SLIT2 IQGAP2 ADRA2A DISC1 APLN NPPA CDK5R1 AQP11 RGMA NEB CLN3 EVL NEFL
0.0986369	78	1684	1.30194	Regulation of programmed cell death	http://amigo.geneontology.org/amigo/term/GO:0043067	SARM1 PDK4 SOX8 SCIN HGF TRIO CAMK2A FAP EDN1 LRP2 NCOA1 MT3 CAPN3 HMOX1 PIK3CG CXCL12 CCL2 ALOX12 NKX3-2 SOD2 E2F3 EYA4 NR2E1 VEGFA LOX ITGA4 GADD45A PREX1 SNAI1 ARHGEF6 RGN AKAP12 CASP9 APC HTR2B SPRY2 EDNRB SMAD6 CYP1B1 FGF2 ADCY10 ACKR3 SLIT2 PIK3R1 FGD2 DAB2 MERTK SLC25A27 KCNB1 SQSTM1 FRZB GRIK2 MAPK7 SERPINB9 GIMAP8 SCG2 CLEC7A PLK3 CLCF1 CDK5R1 JUN GAS1 CSF1R DIABLO SOCS3 NRBP2 EVI2B TAF9…
0.0989898	42	811	1.45568	Brain development	http://amigo.geneontology.org/amigo/term/GO:0007420	KDM7A CNTN1 MYO16 FCGR2B CTTNBP2 LRP2 NCOA1 MT3 APLP1 HOXA2 CXCL12 CDK5RAP3 PHACTR1 NR2E1 DLX2 RGS4 EGR2 TSPAN2 SERPINE2 FGF2 SYPL2 GDF7 SLIT2 TTBK1 NLGN4X FZD1 CHRNB2 DISC1 GBX2 COL3A1 S1PR1 CDK5R1 AATK SOX2 CSF1R ABAT APOD PCDH18 C5AR1 MAFB NEFL CCDC39
0.0992856	12	156	2.16219	Response to glucocorticoid	http://amigo.geneontology.org/amigo/term/GO:0051384	EDN1 ALDH3A1 GHR SPARC CDO1 CASP9 SLIT2 PAM UCP3 FIBIN BGLAP NEFL
0.0993364	6	52	3.24329	Mast cell mediated immunity	http://amigo.geneontology.org/amigo/term/GO:0002448	FGR CD84 HMOX1 PIK3CG SERPINB9 NPPA
0.0993364	6	52	3.24329	Positive regulation of nitric oxide biosynthetic process	http://amigo.geneontology.org/amigo/term/GO:0045429	EDN1 MMP8 CD36 TLR4 PTX3 CLEC7A
0.0995029	17	255	1.8739	Potassium ion transport	http://amigo.geneontology.org/amigo/term/GO:0006813	ABCC9 KCND1 KCNT1 KCNQ4 RGS4 KCNIP2 ADRA2A KCNE4 KCNK13 SLC24A2 RNF207 KCNB1 KCNAB3 NPPA KCNE3 KCNA2 KCNQ3
0.0995029	32	581	1.54815	Negative regulation of response to external stimulus	http://amigo.geneontology.org/amigo/term/GO:0032102	FGR HGF FCGR2B FAP EDN1 ADCYAP1R1 SEMA5B CD200 CCL2 ALOX12 RAMP3 TNFAIP6 FGL2 HAVCR2 SERPINE2 FGF2 NLRP12 FCGR2A SLIT2 PTPRO VSIG4 CXCL13 SLAMF8 MAPK7 SERPINB9 GPR27 CD163 RGMA ABAT SOCS3 DPP4 MMP12
0.0995029	27	469	1.61819	Mononuclear cell differentiation	http://amigo.geneontology.org/amigo/term/GO:1903131	CD4 SPI1 FCGR2B CD83 VEGFA CD86 ITGA4 LOXL3 SASH3 PDE1B PREX1 FGL2 PTPN22 DOCK2 DOCK10 IRF4 NFKBIZ PIK3R1 MERTK FZD7 SLAMF8 FCER1G GPR183 CLCF1 JUN CSF1R MAFB
0.101965	27	470	1.61474	Modulation of chemical synaptic transmission	http://amigo.geneontology.org/amigo/term/GO:0050804	NCDN CAMK2A EDN1 STX1B CACNG7 CCL2 P2RX3 NR2E1 PLCL1 RGS4 EGR2 UNC13A AKAP12 SERPINE2 CDH11 NLGN4X GRIK4 ADRA2A SLC24A2 KCNB1 CHRNB2 SQSTM1 DISC1 GRM2 GRIK2 NPTX1 CLN3
0.102063	26	448	1.6313	Muscle system process	http://amigo.geneontology.org/amigo/term/GO:0003012	EDN1 HMOX1 PIK3CG P2RX3 ASB3 RGS4 KCNIP2 TMOD2 CHRM3 DTNA HTR2B EDNRB STAC2 GRIP2 ADRA2A KCNE4 RNF207 CHRNB2 KLF15 NPNT SLN NPPA KCNE3 ABAT NEB GSTM2
0.102071	22	361	1.71298	Muscle contraction	http://amigo.geneontology.org/amigo/term/GO:0006936	EDN1 PIK3CG P2RX3 ASB3 KCNIP2 TMOD2 CHRM3 DTNA HTR2B EDNRB STAC2 GRIP2 ADRA2A KCNE4 RNF207 CHRNB2 NPNT NPPA KCNE3 ABAT NEB GSTM2
0.102209	17	256	1.86658	Cellular response to transforming growth factor beta stimulus	http://amigo.geneontology.org/amigo/term/GO:0071560	LTBP1 SPI1 EDN1 LPXN LOX POSTN SOX5 SPRY2 SMAD6 DAB2 FBN1 MAPK7 COL3A1 NPNT HTRA4 NRROS JUN
0.103188	76	1639	1.30338	Regulation of apoptotic process	http://amigo.geneontology.org/amigo/term/GO:0042981	SARM1 PDK4 SOX8 SCIN HGF TRIO CAMK2A FAP EDN1 LRP2 NCOA1 MT3 CAPN3 HMOX1 PIK3CG CXCL12 CCL2 ALOX12 NKX3-2 SOD2 E2F3 EYA4 NR2E1 VEGFA LOX ITGA4 GADD45A PREX1 SNAI1 ARHGEF6 RGN AKAP12 CASP9 APC HTR2B SPRY2 EDNRB SMAD6 CYP1B1 ADCY10 ACKR3 SLIT2 PIK3R1 FGD2 DAB2 MERTK SLC25A27 KCNB1 SQSTM1 FRZB GRIK2 MAPK7 SERPINB9 GIMAP8 SCG2 PLK3 CLCF1 CDK5R1 JUN GAS1 CSF1R DIABLO SOCS3 NRBP2 EVI2B TAF9B CERKL CLN3…
0.103188	33	606	1.53066	Regulation of system process	http://amigo.geneontology.org/amigo/term/GO:0044057	HGF CELF2 ABCC9 EDN1 STX1B KCND1 CORO2B CACNG7 PIK3CG P2RX3 ASB3 RGS4 KCNIP2 EGR2 CHRM3 EDNRB FXYD6 NLGN4X ADRA2A PTPRO KCNE4 RNF207 NPR2 NPNT SHOX2 SLN NPTX1 APLN NPPA KCNE3 ABAT GSTM2 ADORA3
0.103188	5	38	3.69849	Negative regulation of exocytosis	http://amigo.geneontology.org/amigo/term/GO:0045920	CD84 SPI1 FCGR2B HMOX1 ADRA2A
0.103188	5	38	3.69849	Protein kinase C signaling	http://amigo.geneontology.org/amigo/term/GO:0070528	VEGFA PLEK AKAP12 HTR2B FIBIN
0.103188	27	471	1.61132	Regulation of trans-synaptic signaling	http://amigo.geneontology.org/amigo/term/GO:0099177	NCDN CAMK2A EDN1 STX1B CACNG7 CCL2 P2RX3 NR2E1 PLCL1 RGS4 EGR2 UNC13A AKAP12 SERPINE2 CDH11 NLGN4X GRIK4 ADRA2A SLC24A2 KCNB1 CHRNB2 SQSTM1 DISC1 GRM2 GRIK2 NPTX1 CLN3
0.103188	5	38	3.69849	Positive regulation of morphogenesis of an epithelium	http://amigo.geneontology.org/amigo/term/GO:1905332	SOX8 ALOX12 VEGFA LIF FGF2
0.103418	8	85	2.64551	Positive regulation of phagocytosis	http://amigo.geneontology.org/amigo/term/GO:0050766	FCGR2B CCL2 DOCK2 CD36 MERTK FCER1G PTX3 CLEC7A
0.103856	29	516	1.57974	Positive regulation of cell adhesion	http://amigo.geneontology.org/amigo/term/GO:0045785	CD4 IBSP APBB1IP ECM2 CXCL12 MAP3K8 CCL2 CD83 VEGFA CD86 ITGA4 SASH3 PREX1 LIF DUSP26 PTPN22 HAVCR2 CD36 NFKBIZ PIK3R1 MEGF10 ABI3BP CXCL13 PLPP3 DISC1 NPNT FRMD5 SOX2 DPP4
0.105082	4	25	4.49736	Response to oxygen radical	http://amigo.geneontology.org/amigo/term/GO:0000305	MT3 SOD2 CD36 UCP3
0.105082	54	1102	1.37737	Embryo development	http://amigo.geneontology.org/amigo/term/GO:0009790	SOX8 PKD1 NTN1 EDN1 LRP2 NCOA1 HOXA2 NKX3-2 VEGFA ITGA4 LOXL3 DLX2 KCNQ4 MMP8 GORAB RDH10 ACVR2A SNAI1 LIF KIDINS220 APLNR HTR2B PCDH8 SPRY2 SMAD6 RBP4 FGF2 LPAR6 GDF7 FZD7 RNF207 SIM2 SLC25A34 PKDCC FRZB BBS5 DACT1 SALL2 FBN1 DCHS1 MAPK7 GBX2 SHOX2 CXCL8 APLN CHRNA9 CDK5R1 SOX2 RGMA HOXB4 SOCS3 SOX18 MAFB CCDC39
0.105082	4	25	4.49736	Vascular associated smooth muscle contraction	http://amigo.geneontology.org/amigo/term/GO:0014829	EDN1 CHRM3 EDNRB GRIP2
0.105082	19	299	1.78616	Negative regulation of cell migration	http://amigo.geneontology.org/amigo/term/GO:0030336	DCN CD200 HMOX1 CXCL12 CCL2 GADD45A CYP1B1 FGF2 TMEFF2 SLIT2 CXCL13 SLAMF8 COL3A1 PTPRM APOD EVL DPP4 PLXNB3 ADORA3
0.105082	6	53	3.1821	Collagen catabolic process	http://amigo.geneontology.org/amigo/term/GO:0030574	FAP MMP8 CTSK CTSS PHYKPL MMP12
0.105082	4	25	4.49736	Negative regulation of tissue remodeling	http://amigo.geneontology.org/amigo/term/GO:0034104	GPR137B P2RX7 ABI3BP TNFRSF11B
0.105082	12	158	2.13482	Positive regulation of inflammatory response	http://amigo.geneontology.org/amigo/term/GO:0050729	PIK3CG MMP8 LBP TLR4 NLRP12 NFKBIZ PLA2G7 TTBK1 GPRC5B NPPA TLR7 SUCNR1
0.105082	4	25	4.49736	Cell aggregation	http://amigo.geneontology.org/amigo/term/GO:0098743	PKD1 MGP SOX5 ACAN
0.105082	4	25	4.49736	Regulation of cardiac muscle cell membrane repolarization	http://amigo.geneontology.org/amigo/term/GO:0099623	KCNE4 RNF207 NPPA KCNE3
0.105082	6	53	3.1821	Positive regulation of nitric oxide metabolic process	http://amigo.geneontology.org/amigo/term/GO:1904407	EDN1 MMP8 CD36 TLR4 PTX3 CLEC7A
0.105949	7	69	2.85159	Calcium-ion regulated exocytosis	http://amigo.geneontology.org/amigo/term/GO:0017156	SCIN STX1B UNC13A SYT6 SYT2 ADRA2A KCNB1
0.105949	7	69	2.85159	Negative regulation of chemotaxis	http://amigo.geneontology.org/amigo/term/GO:0050922	SEMA5B CCL2 SLIT2 PTPRO CXCL13 SLAMF8 DPP4
0.107036	2	5	11.2434	Valine catabolic process	http://amigo.geneontology.org/amigo/term/GO:0006574	ALDH6A1 ACAD8
0.107036	8	86	2.61474	Negative regulation of autophagy	http://amigo.geneontology.org/amigo/term/GO:0010507	HGF CTSA MT3 HMOX1 NAMPT PTPN22 HTR2B NRBP2
0.107036	2	5	11.2434	Peptidyl-lysine oxidation	http://amigo.geneontology.org/amigo/term/GO:0018057	LOX LOXL3
0.107036	2	5	11.2434	Protein C-linked glycosylation	http://amigo.geneontology.org/amigo/term/GO:0018103	DPY19L1 DPY19L3
0.107036	2	5	11.2434	Peptidyl-tryptophan modification	http://amigo.geneontology.org/amigo/term/GO:0018211	DPY19L1 DPY19L3
0.107036	2	5	11.2434	Protein C-linked glycosylation via tryptophan	http://amigo.geneontology.org/amigo/term/GO:0018317	DPY19L1 DPY19L3
0.107036	2	5	11.2434	Protein C-linked glycosylation via 2 -alpha-mannosyl-L-tryptophan	http://amigo.geneontology.org/amigo/term/GO:0018406	DPY19L1 DPY19L3
0.107036	13	178	2.05287	Platelet activation	http://amigo.geneontology.org/amigo/term/GO:0030168	LCP2 PIK3CG ALOX12 PLEK SERPINE2 TLR4 PIK3R5 PIK3R1 ADRA2A MERTK FCER1G COL3A1 ABAT
0.107036	2	5	11.2434	Positive regulation of toll-like receptor 9 signaling pathway	http://amigo.geneontology.org/amigo/term/GO:0034165	PTPN22 SLC15A4
0.107036	2	5	11.2434	Pyruvate biosynthetic process	http://amigo.geneontology.org/amigo/term/GO:0042866	SDS HOGA1
0.107036	11	140	2.20853	Cellular response to fibroblast growth factor stimulus	http://amigo.geneontology.org/amigo/term/GO:0044344	ANOS1 CCL2 FGF1 POSTN SPRY2 FGF2 CXCL13 CXCL8 APLN FGFBP3 LRIT3
0.107036	2	5	11.2434	Nucleobase catabolic process	http://amigo.geneontology.org/amigo/term/GO:0046113	ALDH6A1 DPYD
0.107036	2	5	11.2434	Axonogenesis involved in innervation	http://amigo.geneontology.org/amigo/term/GO:0060385	ITGA4 NPTX1
0.107036	2	5	11.2434	Spongiotrophoblast differentiation	http://amigo.geneontology.org/amigo/term/GO:0060708	LIF SOCS3
0.107036	11	140	2.20853	Regulation of wound healing	http://amigo.geneontology.org/amigo/term/GO:0061041	FAP EDN1 CADM4 ALOX12 CD36 SERPINE2 FGF2 ADRA2A PLPP3 CLEC7A ABAT
0.107036	2	5	11.2434	Glutamate homeostasis	http://amigo.geneontology.org/amigo/term/GO:0090461	GRM2 KCTD7
0.107036	2	5	11.2434	Reversible differentiation	http://amigo.geneontology.org/amigo/term/GO:0090677	OLFM2 SOD2
0.107036	2	5	11.2434	Neuronal dense core vesicle exocytosis	http://amigo.geneontology.org/amigo/term/GO:0099011	UNC13A SYT6
0.107036	2	5	11.2434	Presynaptic dense core vesicle exocytosis	http://amigo.geneontology.org/amigo/term/GO:0099525	UNC13A SYT6
0.107036	2	5	11.2434	Oligopeptide import across plasma membrane	http://amigo.geneontology.org/amigo/term/GO:0140205	SLC15A4 SLC15A2
0.107036	2	5	11.2434	Dipeptide import across plasma membrane	http://amigo.geneontology.org/amigo/term/GO:0140206	SLC15A4 SLC15A2
0.107036	2	5	11.2434	Positive regulation of ATPase-coupled calcium transmembrane transporter activity	http://amigo.geneontology.org/amigo/term/GO:1901896	VMP1 RGN
0.107036	2	5	11.2434	Positive regulation of delayed rectifier potassium channel activity	http://amigo.geneontology.org/amigo/term/GO:1902261	RNF207 NPPA
0.107036	2	5	11.2434	Folate import across plasma membrane	http://amigo.geneontology.org/amigo/term/GO:1904447	LRP2 FOLR2
0.107036	2	5	11.2434	Negative regulation of vascular endothelial cell proliferation	http://amigo.geneontology.org/amigo/term/GO:1905563	CCL2 COL4A3
0.107805	5	39	3.60365	Neurotransmitter metabolic process	http://amigo.geneontology.org/amigo/term/GO:0042133	MOXD1 DAGLA GCHFR ABAT CLN3
0.107805	13	179	2.0414	Neuron projection extension	http://amigo.geneontology.org/amigo/term/GO:1990138	NTN1 SEMA5B MT3 CACNG7 CXCL12 VEGFA ITGA4 UNC13A POSTN SYT2 SLIT2 DISC1 CDK5R1
0.107805	5	39	3.60365	Regulation of NMDA receptor activity	http://amigo.geneontology.org/amigo/term/GO:2000310	CAMK2A CCL2 GRIA2 DAPK1 NEFL
0.108161	32	589	1.52712	Sensory organ development	http://amigo.geneontology.org/amigo/term/GO:0007423	SOX8 NTN1 EDN1 HOXA2 NKX3-2 EYA4 NR2E1 VEGFA SPARC DLX2 KCNQ4 RDH10 SPRY2 CYP1B1 RBP4 FGF2 CXCL14 MERTK SLC25A27 FRZB TMC1 SALL2 FBN1 DCHS1 GBX2 CYTL1 COL8A2 PTPRM CHRNA9 SOX2 MAFB CRYGS
0.108161	11	141	2.19286	Regulation of phosphatidylinositol 3-kinase signaling	http://amigo.geneontology.org/amigo/term/GO:0014066	FGR DCN HGF PPP2R5B PIK3CG VEGFA SERPINE2 FGF2 PIK3R5 PIK3R1 LIME1
0.108161	3	14	6.02325	Positive regulation of catecholamine secretion	http://amigo.geneontology.org/amigo/term/GO:0033605	CXCL12 KCNB1 CHRNB2
0.108161	3	14	6.02325	Negative regulation of homotypic cell-cell adhesion	http://amigo.geneontology.org/amigo/term/GO:0034111	ALOX12 SERPINE2 ABAT
0.108161	3	14	6.02325	Lipoprotein transport	http://amigo.geneontology.org/amigo/term/GO:0042953	VMP1 CD36 ZDHHC17
0.108161	6	54	3.12317	Sulfur compound catabolic process	http://amigo.geneontology.org/amigo/term/GO:0044273	DCN VCAN CDO1 LUM ACAN PRELP
0.108161	7	70	2.81085	Regulation of nitric oxide biosynthetic process	http://amigo.geneontology.org/amigo/term/GO:0045428	EDN1 MMP8 RGN CD36 TLR4 PTX3 CLEC7A
0.108161	28	498	1.5804	Regulation of inflammatory response	http://amigo.geneontology.org/amigo/term/GO:0050727	FGR HGF FCGR2B ADCYAP1R1 CD200 PIK3CG BST1 MMP8 RAMP3 TNFAIP6 LBP DAGLA EDNRB TLR4 NLRP12 FCGR2A NFKBIZ PLA2G7 TTBK1 SLAMF8 MAPK7 GPRC5B GPR27 NPPA CD163 SOCS3 TLR7 SUCNR1
0.108161	3	14	6.02325	Regulation of neurotrophin TRK receptor signaling pathway	http://amigo.geneontology.org/amigo/term/GO:0051386	PPP2R5B SPRY2 ZDHHC17
0.108161	3	14	6.02325	Membrane hyperpolarization	http://amigo.geneontology.org/amigo/term/GO:0060081	SOD2 KCNQ3 KCTD7
0.108161	3	14	6.02325	Regulation of respiratory burst	http://amigo.geneontology.org/amigo/term/GO:0060263	LBP SLAMF8 CLEC7A
0.108161	3	14	6.02325	Membrane repolarization during ventricular cardiac muscle cell action potential	http://amigo.geneontology.org/amigo/term/GO:0098915	KCNE4 RNF207 KCNE3
0.108161	3	14	6.02325	Regulation of NLRP3 inflammasome complex assembly	http://amigo.geneontology.org/amigo/term/GO:1900225	CD36 TLR4 GBP5
0.108645	8	87	2.58469	Positive regulation of chemokine production	http://amigo.geneontology.org/amigo/term/GO:0032722	HMOX1 LBP POSTN HAVCR2 TLR4 CLEC7A CSF1R TLR7
0.11111	14	200	1.9676	Multicellular organismal signaling	http://amigo.geneontology.org/amigo/term/GO:0035637	ABCC9 KCND1 CACNG7 P2RX3 KCNIP2 FXYD6 KCNE4 RNF207 NPR2 GRIK2 S1PR1 NPPA KCNE3 KCNA2
0.111273	9	105	2.4093	Interleukin-8 production	http://amigo.geneontology.org/amigo/term/GO:0032637	TLR8 CD33 LBP CHI3L1 PTPN22 TLR4 CLEC7A TLR1 TLR7
0.111273	9	105	2.4093	Regulation of interleukin-8 production	http://amigo.geneontology.org/amigo/term/GO:0032677	TLR8 CD33 LBP CHI3L1 PTPN22 TLR4 CLEC7A TLR1 TLR7
0.112049	4	26	4.32439	Central nervous system projection neuron axonogenesis	http://amigo.geneontology.org/amigo/term/GO:0021952	NR2E1 CDH11 SLIT2 CHRNB2
0.112049	11	142	2.17742	Response to ethanol	http://amigo.geneontology.org/amigo/term/GO:0045471	SPI1 ADCYAP1R1 CCL7 SOD2 SPARC RGS4 CDO1 RBP4 CHRNB2 ABAT BGLAP
0.112049	4	26	4.32439	Membrane repolarization during action potential	http://amigo.geneontology.org/amigo/term/GO:0086011	KCNIP2 KCNE4 RNF207 KCNE3
0.112572	42	824	1.43272	Regulation of kinase activity	http://amigo.geneontology.org/amigo/term/GO:0043549	FGR PKD1 CD4 HGF LCP2 EDN1 MT3 PIK3CG CDK5RAP3 VEGFA GHR FGF1 CD86 KAT2B GADD45A RGN CHI3L1 DUSP26 CAMK1 PTPN22 APC HTR2B SPRY2 FGF2 PIK3R5 PIK3R1 FGD2 TTBK1 ADRA2A PTPRO MERTK SLAMF8 NEK10 GPRC5B LDB2 NPPA CDK5R1 CSF1R SOCS3 C5AR1 LIME1 STRADA
0.113623	17	262	1.82383	Response to transforming growth factor beta	http://amigo.geneontology.org/amigo/term/GO:0071559	LTBP1 SPI1 EDN1 LPXN LOX POSTN SOX5 SPRY2 SMAD6 DAB2 FBN1 MAPK7 COL3A1 NPNT HTRA4 NRROS JUN
0.113678	35	661	1.48835	Regulation of cell projection organization	http://amigo.geneontology.org/amigo/term/GO:0031344	SARM1 CNTN1 HGF NTN1 PPP2R5B FCGR2B SEMA5B MT3 P2RX7 STX1B CXCL12 NR2E1 VEGFA MARK1 PREX1 CAMK1 KIDINS220 APC PLXNC1 SPRY2 SLIT2 PIK3R1 PTPRO FZD1 CHRNB2 DISC1 SHOX2 GAP43 CDK5R1 RGMA CLN3 EVL KIF13B PLXNB3 NEFL
0.113678	15	221	1.90782	Regulation of neuron apoptotic process	http://amigo.geneontology.org/amigo/term/GO:0043523	MT3 HMOX1 CCL2 SOD2 CASP9 KCNB1 GRIK2 CLCF1 CDK5R1 JUN NRBP2 CLN3 C5AR1 EGLN2 NEFL
0.114077	8	88	2.55532	Stem cell development	http://amigo.geneontology.org/amigo/term/GO:0048864	SOX8 EDN1 SEMA5B RDH10 HTR2B EDNRB FGF2 GBX2
0.114742	10	124	2.26682	Positive regulation of tumor necrosis factor production	http://amigo.geneontology.org/amigo/term/GO:0032760	MMP8 SASH3 LBP AKAP12 HAVCR2 CD36 TLR4 PIK3R1 CLEC7A TLR1
0.114742	10	124	2.26682	Ear morphogenesis	http://amigo.geneontology.org/amigo/term/GO:0042471	NTN1 EDN1 HOXA2 NKX3-2 KCNQ4 SPRY2 FRZB GBX2 CHRNA9 MAFB
0.114745	5	40	3.51356	Detection of biotic stimulus	http://amigo.geneontology.org/amigo/term/GO:0009595	FAP LBP TLR4 CLEC7A TLR1
0.114745	5	40	3.51356	Positive regulation of calcium ion transmembrane transporter activity	http://amigo.geneontology.org/amigo/term/GO:1901021	VMP1 RGN STAC2 KCNE3 GSTM2
0.115708	9	106	2.38657	Excitatory postsynaptic potential	http://amigo.geneontology.org/amigo/term/GO:0060079	P2RX7 STX1B GLRB P2RX3 RGS4 NLGN4X CHRNB2 GRIK2 CHRNA9
0.116099	17	263	1.8169	Response to alcohol	http://amigo.geneontology.org/amigo/term/GO:0097305	GRAMD1B SPI1 ADCYAP1R1 MLC1 CCL7 SOD2 GHR SPARC RGS4 CDO1 RBP4 SLIT2 CHRNB2 CCR5 ABAT BGLAP NEFL
0.116229	18	284	1.78153	Cell fate commitment	http://amigo.geneontology.org/amigo/term/GO:0045165	SOX8 HOXA2 NR2E1 APC2 LOXL3 DLX2 SOX5 APC SPRY2 IRF4 FGF2 GDF7 FZD7 SLAMF8 GAP43 GAS1 SOX2 SOX18
0.11642	15	222	1.89922	Negative regulation of cell-cell adhesion	http://amigo.geneontology.org/amigo/term/GO:0022408	SPI1 FCGR2B CXCL12 ALOX12 VEGFA CD86 LOXL3 FGL2 PTPN22 HAVCR2 SERPINE2 GPNMB VSIG4 MAPK7 ABAT
0.118029	37	710	1.46481	Positive regulation of cell death	http://amigo.geneontology.org/amigo/term/GO:0010942	SARM1 SCIN TRIO CAMK2A FCGR2B FAP NCOA1 MT3 HMOX1 CCL2 ALOX12 SOD2 E2F3 ITGA4 GADD45A RAMP3 PREX1 ARHGEF6 AKAP12 CASP9 APC CD36 TLR4 CYP1B1 ADCY10 SLIT2 FGD2 SQSTM1 FRZB GRIK2 CLEC7A SLFN11 CDK5R1 JUN DIABLO DAPK1 MLLT11
0.120366	7	72	2.73277	Regulation of nitric oxide metabolic process	http://amigo.geneontology.org/amigo/term/GO:0080164	EDN1 MMP8 RGN CD36 TLR4 PTX3 CLEC7A
0.122454	16	244	1.84318	Pattern recognition receptor signaling pathway	http://amigo.geneontology.org/amigo/term/GO:0002221	SARM1 TLR8 LBP PTPN22 HAVCR2 CD36 TLR4 IRF4 SLC15A4 CTSK COLEC12 CTSS SLC15A2 TLR1 TLR7 TRIL
0.122454	6	56	3.01163	Regulation of CD4-positive, alpha-beta T cell differentiation	http://amigo.geneontology.org/amigo/term/GO:0043370	CD83 CD86 LOXL3 SASH3 IRF4 NFKBIZ
0.124131	59	1241	1.33634	Negative regulation of molecular function	http://amigo.geneontology.org/amigo/term/GO:0044092	PKD1 ANOS1 HGF SPI1 CAMK2A MT3 CD200 HMOX1 CDK5RAP3 PHACTR1 VEGFA KAT2B ITGA4 GADD45A CNN3 RWDD3 RAMP3 RGN DUSP26 CAMK1 PTPN22 APC HAVCR2 SERPINE2 SPRY2 EDNRB CPEB2 IL18BP SYTL2 GCHFR CYP1B1 NEIL1 NLRP12 SLIT2 IQGAP2 TTBK1 ADRA2A PTPRO KCNE4 DAB2 DISC1 PTX3 GRM2 GEM DACT1 MAPK7 COL4A3 SLN SERPINB9 NPPA KCNE3 JUN RGMA SOCS3 CLN3 PLXNB3 GSTM2 SERPINE3 ADORA3
0.124326	15	224	1.88227	Negative regulation of leukocyte activation	http://amigo.geneontology.org/amigo/term/GO:0002695	FGR CD84 SPI1 FCGR2B CD200 HMOX1 CD86 LOXL3 FGL2 PTPN22 HAVCR2 GPNMB MERTK SAMSN1 VSIG4
0.124326	4	27	4.16422	Eosinophil chemotaxis	http://amigo.geneontology.org/amigo/term/GO:0048245	CCL7 CCL2 CCL8 SCG2
0.124596	10	126	2.23083	T cell activation involved in immune response	http://amigo.geneontology.org/amigo/term/GO:0002286	FCGR2B APBB1IP CD86 LOXL3 FGL2 HAVCR2 IRF4 NFKBIZ FCER1G GPR183
0.124596	8	90	2.49853	Positive regulation of interferon-gamma production	http://amigo.geneontology.org/amigo/term/GO:0032729	BTN3A1 TLR8 SASH3 PTPN22 HAVCR2 TLR4 CLEC7A TLR7
0.124596	8	90	2.49853	Regulation of toll-like receptor signaling pathway	http://amigo.geneontology.org/amigo/term/GO:0034121	SARM1 LBP PTPN22 CD36 TLR4 IRF4 SLC15A4 TLR1
0.124596	3	15	5.6217	NLRP3 inflammasome complex assembly	http://amigo.geneontology.org/amigo/term/GO:0044546	CD36 TLR4 GBP5
0.124596	3	15	5.6217	Lipoprotein localization	http://amigo.geneontology.org/amigo/term/GO:0044872	VMP1 CD36 ZDHHC17
0.124596	24	417	1.61776	Positive regulation of protein kinase activity	http://amigo.geneontology.org/amigo/term/GO:0045860	PKD1 CD4 LCP2 EDN1 MT3 PIK3CG VEGFA GHR FGF1 CD86 CHI3L1 CAMK1 HTR2B SPRY2 FGF2 PIK3R5 FGD2 TTBK1 ADRA2A NEK10 GPRC5B CDK5R1 CSF1R STRADA
0.124596	8	90	2.49853	Positive regulation of mononuclear cell migration	http://amigo.geneontology.org/amigo/term/GO:0071677	SPI1 CXCL12 CCL7 ITGA4 CXCL14 PLA2G7 CXCL13 CCR1
0.124596	14	204	1.92902	Tumor necrosis factor superfamily cytokine production	http://amigo.geneontology.org/amigo/term/GO:0071706	CD33 CD86 MMP8 SASH3 LBP AKAP12 PTPN22 HAVCR2 CD36 GPNMB TLR4 PIK3R1 CLEC7A TLR1
0.124596	34	644	1.48399	Regulation of plasma membrane bounded cell projection organization	http://amigo.geneontology.org/amigo/term/GO:0120035	SARM1 CNTN1 HGF NTN1 PPP2R5B FCGR2B SEMA5B MT3 P2RX7 STX1B CXCL12 NR2E1 VEGFA MARK1 PREX1 CAMK1 KIDINS220 APC PLXNC1 SLIT2 PIK3R1 PTPRO FZD1 CHRNB2 DISC1 SHOX2 GAP43 CDK5R1 RGMA CLN3 EVL KIF13B PLXNB3 NEFL
0.124596	3	15	5.6217	Regulation of axon guidance	http://amigo.geneontology.org/amigo/term/GO:1902667	VEGFA SLIT2 PTPRO
0.124596	14	204	1.92902	Regulation of tumor necrosis factor superfamily cytokine production	http://amigo.geneontology.org/amigo/term/GO:1903555	CD33 CD86 MMP8 SASH3 LBP AKAP12 PTPN22 HAVCR2 CD36 GPNMB TLR4 PIK3R1 CLEC7A TLR1
0.124596	3	15	5.6217	Negative regulation of lymphocyte migration	http://amigo.geneontology.org/amigo/term/GO:2000402	CD200 CCL2 APOD
0.129419	88	1970	1.25561	Positive regulation of macromolecule biosynthetic process	http://amigo.geneontology.org/amigo/term/GO:0010557	SOX8 KDM7A PKD1 CD4 DCN CALCOCO1 HGF KMT2C ZNF112 SPI1 PPP2R5B ACTL6B EDN1 NCOA1 MT3 CAPN3 HAS3 NAMPT TFEC HOXA2 CDK5RAP3 CCL2 E2F3 NR2E1 VEGFA FGF1 CD86 KAT2B DLX2 ACVR2A EGR2 SNAI1 LIF AKAP12 CAMK1 DMTF1 LMO2 TLR4 IRF4 SMAD6 FGF2 LUM NLRP12 GDF7 PIK3R1 HMBOX1 DAB2 FZD7 FZD1 SQSTM1 KLF15 SALL2 MAPK7 ZNF606 GBX2 NPNT LDB2 CAVIN4 CYTL1 S1PR1 APLN NHLH1 BCLAF3 RGMB JUN EPM2AIP1 ZNF594 HOXC10 SOX2 R…
0.129758	6	57	2.95879	Heart valve morphogenesis	http://amigo.geneontology.org/amigo/term/GO:0003179	SNAI1 SMAD6 SLIT2 DCHS1 NPPA MDM4
0.130448	24	419	1.61003	Response to oxygen levels	http://amigo.geneontology.org/amigo/term/GO:0070482	EDN1 MT3 HMOX1 NAMPT CXCL12 ALDH3A1 P2RX3 SOD2 VEGFA RWDD3 HP1BP3 POSTN HILPDA CPEB2 PAM CHRNB2 VEGFD PLK3 NPPA UCP3 ABAT DPP4 MDM4 EGLN2
0.131841	72	1569	1.28987	G protein-coupled receptor signaling pathway	http://amigo.geneontology.org/amigo/term/GO:0007186	ADGRA2 TRIO PLPP1 CAMK2A EDN1 ADCYAP1R1 RGS1 RGS17 PDGFRL APLP1 PIK3CG CXCL12 RASD1 CCL7 CCL2 CCL8 GLRB PDE8B PLEK RGS4 CCRL2 RAMP3 PDE1B PREX1 TMOD2 KLK14 ARHGEF6 AKAP12 CHRM3 DAGLA APLNR GPR55 HTR2B EDNRB LPAR6 GPR65 PIK3R5 PROK1 ACKR3 PIK3R1 IQGAP2 FGD2 ADRA2A FZD7 CXCL13 FZD1 CCR5 OXER1 CCR1 GRM2 GPR146 GPRC5B CXCL8 GPR183 GPR27 S1PR1 FPR1 APLN GPR34 C3AR1 GAP43 GPR160 NPPA CDK5R1 CHRM4 GPR17…
0.131841	9	109	2.32089	Cerebellum development	http://amigo.geneontology.org/amigo/term/GO:0021549	CNTN1 MYO16 FCGR2B NCOA1 SERPINE2 NLGN4X GBX2 CDK5R1 ABAT
0.134076	7	74	2.65891	Regulation of cartilage development	http://amigo.geneontology.org/amigo/term/GO:0061035	SCIN NKX3-2 SOX5 CTSK PKDCC FRZB SHOX2
0.134163	5	42	3.34625	Fear response	http://amigo.geneontology.org/amigo/term/GO:0042596	ASIC4 NR2E1 ADRA2A GRIK2 DPP4
0.134163	11	147	2.10336	Response to fibroblast growth factor	http://amigo.geneontology.org/amigo/term/GO:0071774	ANOS1 CCL2 FGF1 POSTN SPRY2 FGF2 CXCL13 CXCL8 APLN FGFBP3 LRIT3
0.134679	2	6	9.3695	B cell proliferation involved in immune response	http://amigo.geneontology.org/amigo/term/GO:0002322	CD180 TLR4
0.134679	4	28	4.0155	Atrioventricular valve development	http://amigo.geneontology.org/amigo/term/GO:0003171	APLNR SMAD6 DCHS1 MDM4
0.134679	8	92	2.44422	Iron ion transport	http://amigo.geneontology.org/amigo/term/GO:0006826	CP HPX SLC40A1 ATP6V1B2 ATP6V0D2 STEAP2 FTH1 ATP6V0E2
0.134679	16	248	1.81345	Cell-matrix adhesion	http://amigo.geneontology.org/amigo/term/GO:0007160	PKD1 CORO2B ECM2 BST1 VEGFA ITGA4 POSTN CD36 ITGB7 PIK3R1 DISC1 COL3A1 NPNT PEAK1 APOD MMP12
0.134679	19	313	1.70627	I-kappaB kinase/NF-kappaB signaling	http://amigo.geneontology.org/amigo/term/GO:0007249	CD4 CAPN3 HMOX1 TLR8 EDA2R CD36 HTR2B TLR4 PELI2 NLRP12 LURAP1L SQSTM1 GPRC5B C18orf32 TRIM52 ZDHHC17 TLR7 LIME1 TIAF1
0.134679	2	6	9.3695	Ectodermal cell differentiation	http://amigo.geneontology.org/amigo/term/GO:0010668	EDA2R FZD7
0.134679	19	312	1.71174	Positive regulation of cell development	http://amigo.geneontology.org/amigo/term/GO:0010720	SOX8 NTN1 LRP2 CXCL12 ASPA VEGFA EGR2 PREX1 LIF SERPINE2 PLXNC1 SLIT2 TTBK1 DISC1 SHOX2 CLEC7A CLCF1 PLXNB3 NEFL
0.134679	2	6	9.3695	Microglia differentiation	http://amigo.geneontology.org/amigo/term/GO:0014004	TSPAN2 NRROS
0.134679	2	6	9.3695	Optic nerve morphogenesis	http://amigo.geneontology.org/amigo/term/GO:0021631	CHRNB2 KCNA2
0.134679	2	6	9.3695	Corticospinal tract morphogenesis	http://amigo.geneontology.org/amigo/term/GO:0021957	CDH11 SLIT2
0.134679	29	535	1.52364	Regulation of cell-cell adhesion	http://amigo.geneontology.org/amigo/term/GO:0022407	CD4 SPI1 FCGR2B CXCL12 MAP3K8 CCL2 ALOX12 CD83 VEGFA CD86 ITGA4 LOXL3 SASH3 FGL2 PTPN22 HAVCR2 SERPINE2 PCDH8 GPNMB NFKBIZ PIK3R1 MEGF10 VSIG4 CXCL13 PLPP3 MAPK7 SOX2 ABAT DPP4
0.134679	10	129	2.17895	Receptor internalization	http://amigo.geneontology.org/amigo/term/GO:0031623	CACNG7 VEGFA GHR RAMP3 CD36 HTR2B ACKR3 FCER1G CXCL8 APLN
0.134679	7	75	2.62346	Lipopolysaccharide-mediated signaling pathway	http://amigo.geneontology.org/amigo/term/GO:0031663	SPI1 CCL2 LBP CD180 PTPN22 CD36 TLR4
0.134679	2	6	9.3695	Response to vitamin K	http://amigo.geneontology.org/amigo/term/GO:0032571	POSTN BGLAP
0.134679	22	377	1.64028	Regulation of actin cytoskeleton organization	http://amigo.geneontology.org/amigo/term/GO:0032956	SCIN EDN1 CORO2B CXCL12 BST1 PLEK RND3 RGS4 PREX1 TMOD2 GPR65 TMEFF2 SLIT2 PIK3R1 IQGAP2 PAM S1PR1 SYNPO CDK5R1 CSF1R NEB EVL
0.134679	2	6	9.3695	Response to L-ascorbic acid	http://amigo.geneontology.org/amigo/term/GO:0033591	SOD2 SPARC
0.134679	2	6	9.3695	Positive regulation of toll-like receptor 7 signaling pathway	http://amigo.geneontology.org/amigo/term/GO:0034157	PTPN22 SLC15A4
0.134679	4	28	4.0155	Toll-like receptor 9 signaling pathway	http://amigo.geneontology.org/amigo/term/GO:0034162	PTPN22 HAVCR2 SLC15A4 TLR7
0.134679	7	75	2.62346	Tissue regeneration	http://amigo.geneontology.org/amigo/term/GO:0042246	CAPN3 CPQ POSTN FZD7 GAP43 SOX2 APOD
0.134679	2	6	9.3695	Negative regulation of mast cell degranulation	http://amigo.geneontology.org/amigo/term/GO:0043305	CD84 HMOX1
0.134679	2	6	9.3695	Regulation of photoreceptor cell differentiation	http://amigo.geneontology.org/amigo/term/GO:0046532	SOX8 DLX2
0.134679	2	6	9.3695	Negative regulation of photoreceptor cell differentiation	http://amigo.geneontology.org/amigo/term/GO:0046533	SOX8 DLX2
0.134679	2	6	9.3695	Negative regulation of cyclic-nucleotide phosphodiesterase activity	http://amigo.geneontology.org/amigo/term/GO:0051344	RGN MAPK7
0.134679	4	28	4.0155	Negative regulation of stress fiber assembly	http://amigo.geneontology.org/amigo/term/GO:0051497	CORO2B TMEFF2 PIK3R1 S1PR1
0.134679	8	92	2.44422	Positive regulation of cell division	http://amigo.geneontology.org/amigo/term/GO:0051781	VEGFA FGF1 HTR2B FGF2 PROK1 VEGFD MAP10 LBH
0.134679	2	6	9.3695	Regulation of respiratory burst involved in inflammatory response	http://amigo.geneontology.org/amigo/term/GO:0060264	LBP SLAMF8
0.134679	12	168	2.00775	Calcium ion transport into cytosol	http://amigo.geneontology.org/amigo/term/GO:0060402	ADCYAP1R1 P2RX7 CAPN3 P2RX3 RAMP3 APLNR HTR2B FGF2 SLC24A2 CCR5 LIME1 GSTM2
0.134679	2	6	9.3695	Positive regulation of mast cell chemotaxis	http://amigo.geneontology.org/amigo/term/GO:0060754	VEGFA VEGFD
0.134679	2	6	9.3695	Response to bacterial lipopeptide	http://amigo.geneontology.org/amigo/term/GO:0070339	CD36 TLR1
0.134679	2	6	9.3695	Nucleotide-binding oligomerization domain containing 1 signaling pathway	http://amigo.geneontology.org/amigo/term/GO:0070427	TLR4 SLC15A4
0.134679	2	6	9.3695	Cellular response to bacterial lipoprotein	http://amigo.geneontology.org/amigo/term/GO:0071220	CD36 TLR1
0.134679	2	6	9.3695	Cellular response to bacterial lipopeptide	http://amigo.geneontology.org/amigo/term/GO:0071221	CD36 TLR1
0.134679	2	6	9.3695	Endocannabinoid signaling pathway	http://amigo.geneontology.org/amigo/term/GO:0071926	CAMK2A DAGLA
0.134679	2	6	9.3695	Proximal tubule development	http://amigo.geneontology.org/amigo/term/GO:0072014	PKD1 AQP11
0.134679	2	6	9.3695	Amino acid homeostasis	http://amigo.geneontology.org/amigo/term/GO:0080144	GRM2 KCTD7
0.134679	8	92	2.44422	Lamellipodium organization	http://amigo.geneontology.org/amigo/term/GO:0097581	ARHGEF6 SLIT2 PIK3R1 PTPRO S1PR1 SH2B1 SPATA13 PLXNB3
0.134679	2	6	9.3695	Cell-substrate junction disassembly	http://amigo.geneontology.org/amigo/term/GO:0120180	PIK3R1 MAPRE2
0.134679	2	6	9.3695	Focal adhesion disassembly	http://amigo.geneontology.org/amigo/term/GO:0120181	PIK3R1 MAPRE2
0.134679	2	6	9.3695	Regulation of focal adhesion disassembly	http://amigo.geneontology.org/amigo/term/GO:0120182	PIK3R1 MAPRE2
0.134679	2	6	9.3695	Positive regulation of focal adhesion disassembly	http://amigo.geneontology.org/amigo/term/GO:0120183	PIK3R1 MAPRE2
0.134679	2	6	9.3695	Regulation of endothelial tube morphogenesis	http://amigo.geneontology.org/amigo/term/GO:1901509	ALOX12 FGF1
0.134679	2	6	9.3695	Negative regulation of lamellipodium organization	http://amigo.geneontology.org/amigo/term/GO:1902744	SLIT2 PLXNB3
0.134679	2	6	9.3695	Regulation of matrix metallopeptidase secretion	http://amigo.geneontology.org/amigo/term/GO:1904464	CD200 TLR4
0.134679	6	58	2.90778	Regulation of vascular associated smooth muscle cell proliferation	http://amigo.geneontology.org/amigo/term/GO:1904705	EDN1 HMOX1 SOD2 FGF2 APLN JUN
0.134679	2	6	9.3695	Matrix metallopeptidase secretion	http://amigo.geneontology.org/amigo/term/GO:1990773	CD200 TLR4
0.134679	6	58	2.90778	Vascular associated smooth muscle cell proliferation	http://amigo.geneontology.org/amigo/term/GO:1990874	EDN1 HMOX1 SOD2 FGF2 APLN JUN
0.134679	2	6	9.3695	Negative regulation of T cell migration	http://amigo.geneontology.org/amigo/term/GO:2000405	CD200 APOD
0.134884	13	188	1.94367	Positive regulation of protein kinase B signaling	http://amigo.geneontology.org/amigo/term/GO:0051897	HGF LRP2 PIK3CG VEGFA FGF1 CD86 RAMP3 CHI3L1 SPRY2 FGF2 PIK3R5 PIK3R1 TSPYL5
0.136382	8	93	2.41794	Regulation of humoral immune response	http://amigo.geneontology.org/amigo/term/GO:0002920	FCGR2B HPX CFP VSIG4 CXCL13 C1QC C3AR1 C5AR1
0.136382	5	43	3.26843	Vesicle docking involved in exocytosis	http://amigo.geneontology.org/amigo/term/GO:0006904	STX1B PLEK UNC13A SYTL2 KCNB1
0.136382	62	1329	1.31131	Response to abiotic stimulus	http://amigo.geneontology.org/amigo/term/GO:0009628	PKD1 DCN CAMK2A EDN1 SEMA5B MT3 CAPN3 HMOX1 MLC1 TLR8 CLCN7 AQP9 NAMPT TFEC CXCL12 ALDH3A1 CCL7 P2RX3 SOD2 VEGFA SPARC FGF1 GADD45A RWDD3 HP1BP3 RPAIN AKAP12 CASP9 CHI3L1 POSTN HILPDA HTR2B SERPINE2 TLR4 CPEB2 GPR65 PIK3R1 PAM SLC25A27 CHRNB2 DISC1 CTSS GRIK2 TMC1 VEGFD MFAP4 BEST1 COL3A1 HSPA6 PLK3 CHRNA9 NPPA UCP3 JUN TSPYL5 ABAT CLN3 TLR7 DPP4 MDM4 BGLAP EGLN2
0.136382	8	93	2.41794	Neural crest cell differentiation	http://amigo.geneontology.org/amigo/term/GO:0014033	SOX8 EDN1 SEMA5B RDH10 HTR2B EDNRB FRZB GBX2
0.136382	3	16	5.27035	Detection of molecule of bacterial origin	http://amigo.geneontology.org/amigo/term/GO:0032490	LBP TLR4 TLR1
0.136382	3	16	5.27035	Sequestering of extracellular ligand from receptor	http://amigo.geneontology.org/amigo/term/GO:0035581	LTBP1 FBN1 NRROS
0.136382	3	16	5.27035	Dermatan sulfate proteoglycan biosynthetic process	http://amigo.geneontology.org/amigo/term/GO:0050651	DCN VCAN CSGALNACT1
0.136382	3	16	5.27035	Coronary vasculature morphogenesis	http://amigo.geneontology.org/amigo/term/GO:0060977	LRP2 VEGFA FGF2
0.136382	3	16	5.27035	Regulation of nucleotide-binding oligomerization domain containing 2 signaling pathway	http://amigo.geneontology.org/amigo/term/GO:0070432	PTPN22 TLR4 SLC15A4
0.136382	3	16	5.27035	Cellular response to ethanol	http://amigo.geneontology.org/amigo/term/GO:0071361	SPI1 CCL7 SOD2
0.136382	5	43	3.26843	Pyridine-containing compound metabolic process	http://amigo.geneontology.org/amigo/term/GO:0072524	SARM1 NAMPT AOX1 NUDT17 ASPDH
0.136382	3	16	5.27035	Inflammasome complex assembly	http://amigo.geneontology.org/amigo/term/GO:0140632	CD36 TLR4 GBP5
0.136382	3	16	5.27035	Sulfate transmembrane transport	http://amigo.geneontology.org/amigo/term/GO:1902358	SLC26A1 SLC13A4 SLC26A11
0.136772	10	130	2.16219	Regulation of B cell activation	http://amigo.geneontology.org/amigo/term/GO:0050864	FCGR2B BST1 SASH3 TLR4 SLC15A4 SAMSN1 SLAMF8 CHRNB2 GPR183 CLCF1
0.138493	6	59	2.85849	Retinol metabolic process	http://amigo.geneontology.org/amigo/term/GO:0042572	CYP3A5 RDH10 RDH5 CYP1B1 RBP4 ALDH1A1
0.138493	16	251	1.79178	Stress-activated MAPK cascade	http://amigo.geneontology.org/amigo/term/GO:0051403	HGF SPI1 FCGR2B MAP3K8 VEGFA GADD45A MMP8 ARHGEF6 EDA2R PTPN22 TLR4 FZD7 GRIK2 DACT1 CLEC7A NPPA
0.138493	16	251	1.79178	Regulation of protein kinase B signaling	http://amigo.geneontology.org/amigo/term/GO:0051896	HGF PPP2R5B LRP2 PIK3CG VEGFA FGF1 CD86 RAMP3 CHI3L1 SPRY2 FGF2 PIK3R5 PIK3R1 GRM2 OTUD3 TSPYL5
0.140306	7	76	2.58894	Cardiac cell development	http://amigo.geneontology.org/amigo/term/GO:0055006	EDN1 VEGFA RGS4 ALPK3 SHOX2 NPPA NEB
0.140811	11	150	2.06129	Positive regulation of epithelial cell migration	http://amigo.geneontology.org/amigo/term/GO:0010634	ADGRA2 EDN1 HMOX1 PIK3CG ALOX12 VEGFA SPARC FGF1 FGF2 PLPP3 MAPRE2
0.141122	4	29	3.87704	Mature B cell differentiation involved in immune response	http://amigo.geneontology.org/amigo/term/GO:0002313	SPI1 FCGR2B DOCK10 GPR183
0.141122	9	112	2.25872	Regulation of pH	http://amigo.geneontology.org/amigo/term/GO:0006885	PDK4 EDN1 EDNRB ATP6V1B2 ATP6V0D2 SLAMF8 ATP6V0E2 AQP11 CLN3
0.141122	4	29	3.87704	Endothelial cell chemotaxis	http://amigo.geneontology.org/amigo/term/GO:0035767	VEGFA FGF1 FGF2 CXCL13
0.141122	4	29	3.87704	Detection of external biotic stimulus	http://amigo.geneontology.org/amigo/term/GO:0098581	LBP TLR4 CLEC7A TLR1
0.141314	10	131	2.14569	Sprouting angiogenesis	http://amigo.geneontology.org/amigo/term/GO:0002040	ADGRA2 HMOX1 NR2E1 VEGFA FGF1 APLNR FGF2 SLIT2 ESM1 VEGFD
0.141314	12	170	1.98413	Regulation of cell shape	http://amigo.geneontology.org/amigo/term/GO:0008360	FGR ARHGAP15 EPB41L3 CCL7 CCL2 VEGFA RND3 PLXNC1 FGD2 FMNL2 CSF1R PLXNB3
0.141314	13	190	1.92321	Regulation of cell size	http://amigo.geneontology.org/amigo/term/GO:0008361	NTN1 EDN1 SEMA5B MT3 P2RX7 CXCL12 VEGFA PLEK DISC1 CDK5R1 AQP11 RGMA CLN3
0.141314	12	170	1.98413	Import across plasma membrane	http://amigo.geneontology.org/amigo/term/GO:0098739	ABCC9 LRP2 RGS4 RAMP3 CD36 SLC5A6 SLC15A4 SLC24A2 STEAP2 SLC15A2 FOLR2 SLC22A4
0.142161	29	540	1.50953	Negative regulation of intracellular signal transduction	http://amigo.geneontology.org/amigo/term/GO:1902532	SPI1 PPP2R5B P2RX7 CXCL12 CDK5RAP3 SOD2 PLEK GBP1 SNAI1 LIF DUSP26 PTPN22 APLNR SERPINE2 SPRY2 TLR4 NLRP12 ACKR3 SLIT2 ARHGAP25 FBP1 DACT1 MAPK7 OTUD3 CHRNA9 NPPA C1QL4 TAF9B CASTOR1
0.143738	24	427	1.57987	Positive regulation of cell activation	http://amigo.geneontology.org/amigo/term/GO:0050867	FGR CD4 CAPN3 MAP3K8 CCL2 BST1 CD83 CD86 PLEK MMP8 SASH3 LBP PTPN22 HAVCR2 TLR4 NFKBIZ PIK3R1 TTBK1 CHRNB2 GPR183 CLEC7A NPPA CLCF1 DPP4
0.144797	17	274	1.74396	Sensory organ morphogenesis	http://amigo.geneontology.org/amigo/term/GO:0090596	SOX8 NTN1 EDN1 HOXA2 NKX3-2 VEGFA KCNQ4 SPRY2 RBP4 FGF2 FRZB FBN1 GBX2 COL8A2 PTPRM CHRNA9 MAFB
0.145006	11	151	2.04764	Regulation of postsynaptic membrane potential	http://amigo.geneontology.org/amigo/term/GO:0060078	P2RX7 STX1B GLRB P2RX3 RGS4 NLGN4X GRIK4 CHRNB2 GRIK2 CHRNA9 ABAT
0.145289	16	253	1.77761	Neuron apoptotic process	http://amigo.geneontology.org/amigo/term/GO:0051402	MT3 HMOX1 CCL2 SOD2 CASP9 KCNB1 GRIK2 CLCF1 CDK5R1 JUN DIABLO NRBP2 CLN3 C5AR1 EGLN2 NEFL
0.145965	26	473	1.54508	Response to peptide hormone	http://amigo.geneontology.org/amigo/term/GO:0043434	PDK4 CAMK2A EDN1 SRSF5 CXCL12 GHR SPARC KAT2B EGR2 CDO1 APC EDNRB CPEB2 PIK3R1 ATP6V1B2 ATP6V0D2 KLF15 FBN1 ATP6V0E2 NPPA UCP3 EPM2AIP1 GPR173 SOCS3 BGLAP NEFL
0.145965	9	113	2.23873	Regulation of protein localization to plasma membrane	http://amigo.geneontology.org/amigo/term/GO:1903076	GBP1 RAMP3 STAC2 PIK3R1 DAB2 SQSTM1 PKDCC CNPY4 CLN3
0.145965	12	171	1.97253	Adaptive thermogenesis	http://amigo.geneontology.org/amigo/term/GO:1990845	VEGFA PLCL1 APC CD36 TLR4 IRF4 ALDH1A1 SLN KSR2 UCP3 HOXC10 DIO2
0.146058	62	1336	1.30444	Positive regulation of gene expression	http://amigo.geneontology.org/amigo/term/GO:0010628	FGR SOX8 CD4 CALCOCO1 CNTN1 HGF BTN3A1 SPI1 MT3 P2RX7 CD200 HMOX1 SRSF5 TLR8 PIK3CG ALOX12 HPX CD83 VEGFA FGF1 CD86 KAT2B MMP8 SASH3 RAMP3 LIF LBP AKAP12 CHI3L1 POSTN PTPN22 HAVCR2 CD36 HILPDA HTR2B SPRY2 TLR4 IRF4 CYP1B1 RBP4 FGF2 LUM NLRP12 GDF7 PIK3R1 TTBK1 ADRA2A GBP5 RNF207 FCER1G CELF3 GPRC5B CXCL8 SERPINB9 C3AR1 CLEC7A TLR1 CLCF1 CSF1R TLR7 C5AR1 MMP12
0.146283	7	77	2.55532	Nerve development	http://amigo.geneontology.org/amigo/term/GO:0021675	ITGA4 EGR2 SERPINE2 CHRNB2 NPTX1 KCNA2 MAFB
0.14717	23	406	1.59235	Lymphocyte differentiation	http://amigo.geneontology.org/amigo/term/GO:0030098	CD4 SPI1 FCGR2B CD83 CD86 ITGA4 LOXL3 SASH3 PREX1 FGL2 PTPN22 DOCK2 DOCK10 IRF4 NFKBIZ PIK3R1 MERTK FZD7 SLAMF8 FCER1G GPR183 CLCF1 MAFB
0.147554	53	1115	1.3361	Negative regulation of cell death	http://amigo.geneontology.org/amigo/term/GO:0060548	PDK4 SOX8 HGF EDN1 ADCYAP1R1 LRP2 MT3 CD200 CAPN3 HMOX1 PIK3CG CXCL12 CCL2 ALOX12 NKX3-2 SOD2 EYA4 NR2E1 VEGFA GHR SNAI1 RGN HTR2B SPRY2 EDNRB GPNMB SMAD6 FGF2 ACKR3 PIK3R1 DAB2 MERTK SLC25A27 SQSTM1 GRIK2 MAPK7 SERPINB9 SCG2 PLK3 CLCF1 CSF1R SOCS3 NRBP2 EVI2B TAF9B CERKL CLN3 C5AR1 MDM4 TIAF1 CLEC5A SULT1A3 NEFL
0.150946	12	172	1.96106	Regulation of response to wounding	http://amigo.geneontology.org/amigo/term/GO:1903034	FAP EDN1 CADM4 ALOX12 CD36 SERPINE2 FGF2 ADRA2A PLPP3 CLEC7A RGMA ABAT
0.15256	14	213	1.84751	Positive regulation of peptidyl-tyrosine phosphorylation	http://amigo.geneontology.org/amigo/term/GO:0050731	CD4 CNTN1 HGF HPX VEGFA GHR LIF CD36 ADRA2A GPRC5B CLEC7A CLCF1 CSF1R SOCS3
0.153239	16	255	1.76367	Cellular response to molecule of bacterial origin	http://amigo.geneontology.org/amigo/term/GO:0071219	SPI1 FCGR2B CCL2 CD86 PLSCR4 LBP CD180 PTPN22 HAVCR2 CD36 EDNRB TLR4 CXCL13 CCR5 CXCL8 TLR1
0.153391	20	342	1.64377	Negative regulation of cytokine production	http://amigo.geneontology.org/amigo/term/GO:0001818	HGF CD84 FCGR2B CD200 HMOX1 TLR8 CD33 CD83 IL1R2 GBP1 MMP8 LBP PTPN22 HAVCR2 GPNMB TLR4 NLRP12 MERTK VSIG4 APOD
0.153391	5	45	3.12317	Negative regulation of endothelial cell proliferation	http://amigo.geneontology.org/amigo/term/GO:0001937	CCL2 SPARC COL4A3 SCG2 PTPRM
0.153391	3	17	4.96032	Osteoblast development	http://amigo.geneontology.org/amigo/term/GO:0002076	HOXA2 BGLAP CLEC5A
0.153391	38	756	1.41286	Immune response-regulating signaling pathway	http://amigo.geneontology.org/amigo/term/GO:0002764	FGR SARM1 CD4 BTN3A1 LCP2 FCGR2B FYB1 TLR8 CD33 LPXN BTN3A3 GBP1 LBP CLEC10A PTPN22 HAVCR2 CD36 TLR4 IRF4 SLC15A4 FCGR2A CTSK NFKBIZ PIK3R1 COLEC12 FCER1G CTSS SLC15A2 FPR1 C3AR1 TLR1 JUN FPR3 TLR7 C5AR1 FCGR1B LIME1 TRIL
0.153391	6	61	2.76477	Regulation of myeloid leukocyte mediated immunity	http://amigo.geneontology.org/amigo/term/GO:0002886	FGR CD84 SPI1 FCGR2B HMOX1 NPPA
0.153391	4	30	3.7478	Protein kinase C-activating G protein-coupled receptor signaling pathway	http://amigo.geneontology.org/amigo/term/GO:0007205	PLPP1 EDN1 HTR2B GAP43
0.153391	3	17	4.96032	Sulfate transport	http://amigo.geneontology.org/amigo/term/GO:0008272	SLC26A1 SLC13A4 SLC26A11
0.153391	11	153	2.02087	Response to purine-containing compound	http://amigo.geneontology.org/amigo/term/GO:0014074	ABCC9 P2RX7 AQP9 PIK3CG ALDH3A1 P2RX3 SPARC CDO1 GPD1 JUN GSTM2
0.153391	4	30	3.7478	Cranial nerve morphogenesis	http://amigo.geneontology.org/amigo/term/GO:0021602	EGR2 CHRNB2 KCNA2 MAFB
0.153391	5	45	3.12317	Cellular response to nutrient	http://amigo.geneontology.org/amigo/term/GO:0031670	NCOA1 HMOX1 POSTN FOLR2 BGLAP
0.153391	3	17	4.96032	Glial cell apoptotic process	http://amigo.geneontology.org/amigo/term/GO:0034349	CCL2 AKAP12 CASP9
0.153391	4	30	3.7478	Regulation of mast cell degranulation	http://amigo.geneontology.org/amigo/term/GO:0043304	FGR CD84 HMOX1 NPPA
0.153391	3	17	4.96032	Negative regulation of bone resorption	http://amigo.geneontology.org/amigo/term/GO:0045779	GPR137B P2RX7 TNFRSF11B
0.153391	5	45	3.12317	Positive regulation of muscle contraction	http://amigo.geneontology.org/amigo/term/GO:0045933	EDN1 CHRM3 NPNT NPPA ABAT
0.153391	4	30	3.7478	Chondroitin sulfate proteoglycan biosynthetic process	http://amigo.geneontology.org/amigo/term/GO:0050650	DCN VCAN CSGALNACT1 CYTL1
0.153391	3	17	4.96032	Reflex	http://amigo.geneontology.org/amigo/term/GO:0060004	GLRB TMC1 NPNT
0.153391	5	45	3.12317	Membrane repolarization	http://amigo.geneontology.org/amigo/term/GO:0086009	KCNIP2 KCNE4 RNF207 NPPA KCNE3
0.153391	5	45	3.12317	Regulation of p38MAPK cascade	http://amigo.geneontology.org/amigo/term/GO:1900744	HGF SPI1 VEGFA GADD45A PTPN22
0.153391	3	17	4.96032	Positive regulation of voltage-gated potassium channel activity	http://amigo.geneontology.org/amigo/term/GO:1903818	KCNIP2 RNF207 NPPA
0.153391	5	45	3.12317	Cellular response to amyloid-beta	http://amigo.geneontology.org/amigo/term/GO:1904646	FCGR2B NAMPT ITGA4 CD36 TLR4
0.153391	3	17	4.96032	Positive regulation of vascular endothelial cell proliferation	http://amigo.geneontology.org/amigo/term/GO:1905564	ITGA4 FGF2 APLN
0.156101	9	115	2.1998	Regulation of phagocytosis	http://amigo.geneontology.org/amigo/term/GO:0050764	FGR FCGR2B CCL2 DOCK2 CD36 MERTK FCER1G PTX3 CLEC7A
0.156911	13	194	1.88356	Cytosolic calcium ion transport	http://amigo.geneontology.org/amigo/term/GO:0060401	ADCYAP1R1 P2RX7 CAPN3 P2RX3 RAMP3 APLNR HTR2B FGF2 SLC24A2 MICU3 CCR5 LIME1 GSTM2
0.158346	12	174	1.93852	Biomineral tissue development	http://amigo.geneontology.org/amigo/term/GO:0031214	FGR IBSP SNX10 P2RX7 MGP LOX ACVR2A GPNMB PKDCC CCR1 S1PR1 BGLAP
0.158346	12	174	1.93852	Positive regulation of developmental growth	http://amigo.geneontology.org/amigo/term/GO:0048639	NTN1 EDN1 CAPN3 CACNG7 CXCL12 VEGFA GHR SASH3 UNC13A FGF2 SYT2 DISC1
0.158607	14	215	1.83032	Regulation of production of molecular mediator of immune response	http://amigo.geneontology.org/amigo/term/GO:0002700	FCGR2B HMOX1 HPX CD86 SASH3 PTPN22 CD36 TLR4 RBP4 SLC15A4 GPRC5B CLEC7A CLCF1 TRIL
0.158806	15	236	1.78656	Regulation of synapse structure or activity	http://amigo.geneontology.org/amigo/term/GO:0050803	NTN1 FCGR2B CTTNBP2 STX1B SPARC CAMK1 PCDH8 PTPRO CHRNB2 DISC1 LRRTM1 LRRN1 CDK5R1 SLITRK2 CLN3
0.158806	15	236	1.78656	Reactive oxygen species metabolic process	http://amigo.geneontology.org/amigo/term/GO:0072593	PDK4 EDN1 MT3 ALOX12 BST1 SOD2 NCF2 GADD45A MMP8 PREX1 CD36 TLR4 CYP1B1 CLEC7A NRROS
0.159229	7	79	2.49063	Regulation of calcium-mediated signaling	http://amigo.geneontology.org/amigo/term/GO:0050848	CD4 BST1 P2RX3 PLEK GBP1 RGN MAPK7
0.159229	7	79	2.49063	Exocytic process	http://amigo.geneontology.org/amigo/term/GO:0140029	STX1B STX2 PLEK UNC13A SYTL2 KCNB1 NPPA
0.160494	2	7	8.031	Wound healing involved in inflammatory response	http://amigo.geneontology.org/amigo/term/GO:0002246	HMOX1 ABI3BP
0.160494	2	7	8.031	Respiratory burst involved in inflammatory response	http://amigo.geneontology.org/amigo/term/GO:0002536	LBP SLAMF8
0.160494	16	258	1.74316	Heart morphogenesis	http://amigo.geneontology.org/amigo/term/GO:0003007	LRP2 VEGFA SNAI1 APLNR HTR2B SMAD6 RBP4 SLIT2 RNF207 BBS5 DCHS1 SHOX2 S1PR1 MDM4 SOX18 CCDC39
0.160494	2	7	8.031	Activation of cysteine-type endopeptidase activity involved in apoptotic process by cytochrome c	http://amigo.geneontology.org/amigo/term/GO:0008635	CASP9 DIABLO
0.160494	2	7	8.031	Positive regulation of cGMP-mediated signaling	http://amigo.geneontology.org/amigo/term/GO:0010753	NPR2 NPPA
0.160494	4	31	3.6269	Regulation of macrophage chemotaxis	http://amigo.geneontology.org/amigo/term/GO:0010758	SLAMF8 C3AR1 CSF1R C5AR1
0.160494	2	7	8.031	Peripheral nervous system axon regeneration	http://amigo.geneontology.org/amigo/term/GO:0014012	APOD NEFL
0.160494	8	98	2.29457	Positive regulation of phosphatidylinositol 3-kinase signaling	http://amigo.geneontology.org/amigo/term/GO:0014068	FGR DCN HGF PIK3CG VEGFA FGF2 PIK3R5 PIK3R1
0.160494	2	7	8.031	Skeletal muscle satellite cell activation	http://amigo.geneontology.org/amigo/term/GO:0014719	CAPN3 MEGF10
0.160494	4	31	3.6269	Stem cell division	http://amigo.geneontology.org/amigo/term/GO:0017145	FZD7 HOXB4 EVI2B LBH
0.160494	8	98	2.29457	Cyclic-nucleotide-mediated signaling	http://amigo.geneontology.org/amigo/term/GO:0019935	ADCYAP1R1 APLNR CD36 HTR2B EDNRB NPR2 MAPK7 NPPA
0.160494	12	175	1.92744	Response to corticosteroid	http://amigo.geneontology.org/amigo/term/GO:0031960	EDN1 ALDH3A1 GHR SPARC CDO1 CASP9 SLIT2 PAM UCP3 FIBIN BGLAP NEFL
0.160494	4	31	3.6269	Negative regulation of actin filament bundle assembly	http://amigo.geneontology.org/amigo/term/GO:0032232	CORO2B TMEFF2 PIK3R1 S1PR1
0.160494	4	31	3.6269	Regulation of mast cell activation involved in immune response	http://amigo.geneontology.org/amigo/term/GO:0033006	FGR CD84 HMOX1 NPPA
0.160494	2	7	8.031	Positive regulation of dopamine secretion	http://amigo.geneontology.org/amigo/term/GO:0033603	CXCL12 CHRNB2
0.160494	4	31	3.6269	Positive regulation of toll-like receptor signaling pathway	http://amigo.geneontology.org/amigo/term/GO:0034123	LBP PTPN22 SLC15A4 TLR1
0.160494	2	7	8.031	Negative regulation of MyD88-independent toll-like receptor signaling pathway	http://amigo.geneontology.org/amigo/term/GO:0034128	SARM1 TLR4
0.160494	2	7	8.031	Acylglycerol transport	http://amigo.geneontology.org/amigo/term/GO:0034196	CETP CD36
0.160494	2	7	8.031	Triglyceride transport	http://amigo.geneontology.org/amigo/term/GO:0034197	CETP CD36
0.160494	2	7	8.031	Dipeptide transmembrane transport	http://amigo.geneontology.org/amigo/term/GO:0035442	SLC15A4 SLC15A2
0.160494	2	7	8.031	Phenotypic switching	http://amigo.geneontology.org/amigo/term/GO:0036166	OLFM2 SOD2
0.160494	2	7	8.031	Dopamine catabolic process	http://amigo.geneontology.org/amigo/term/GO:0042420	MOXD1 SULT1A3
0.160494	2	7	8.031	Dipeptide transport	http://amigo.geneontology.org/amigo/term/GO:0042938	SLC15A4 SLC15A2
0.160494	47	978	1.35082	Negative regulation of apoptotic process	http://amigo.geneontology.org/amigo/term/GO:0043066	PDK4 SOX8 HGF EDN1 LRP2 MT3 CAPN3 HMOX1 PIK3CG CXCL12 CCL2 ALOX12 NKX3-2 SOD2 EYA4 NR2E1 VEGFA SNAI1 RGN HTR2B SPRY2 EDNRB SMAD6 ACKR3 PIK3R1 DAB2 MERTK SLC25A27 SQSTM1 GRIK2 MAPK7 SERPINB9 SCG2 PLK3 CLCF1 CSF1R SOCS3 NRBP2 EVI2B TAF9B CERKL CLN3 C5AR1 MDM4 TIAF1 CLEC5A NEFL
0.160494	4	31	3.6269	Positive regulation of smooth muscle contraction	http://amigo.geneontology.org/amigo/term/GO:0045987	EDN1 CHRM3 NPNT ABAT
0.160494	2	7	8.031	Regulation of timing of cell differentiation	http://amigo.geneontology.org/amigo/term/GO:0048505	NR2E1 SERPINE2
0.160494	2	7	8.031	Positive regulation of axon extension involved in axon guidance	http://amigo.geneontology.org/amigo/term/GO:0048842	CXCL12 VEGFA
0.160494	2	7	8.031	Positive regulation of respiratory burst	http://amigo.geneontology.org/amigo/term/GO:0060267	LBP CLEC7A
0.160494	42	856	1.37916	Head development	http://amigo.geneontology.org/amigo/term/GO:0060322	KDM7A CNTN1 MYO16 FCGR2B CTTNBP2 LRP2 NCOA1 MT3 APLP1 HOXA2 CXCL12 CDK5RAP3 PHACTR1 NR2E1 DLX2 RGS4 EGR2 TSPAN2 SERPINE2 FGF2 SYPL2 GDF7 SLIT2 TTBK1 NLGN4X FZD1 CHRNB2 DISC1 GBX2 COL3A1 S1PR1 CDK5R1 AATK SOX2 CSF1R ABAT APOD PCDH18 C5AR1 MAFB NEFL CCDC39
0.160494	2	7	8.031	Bud elongation involved in lung branching	http://amigo.geneontology.org/amigo/term/GO:0060449	RDH10 SPRY2
0.160494	17	280	1.70659	Cellular response to biotic stimulus	http://amigo.geneontology.org/amigo/term/GO:0071216	SPI1 FCGR2B CCL2 CD86 PLSCR4 LBP CD180 PTPN22 HAVCR2 CD36 EDNRB TLR4 CXCL13 CCR5 CXCL8 CLEC7A TLR1
0.160494	2	7	8.031	Pyridine-containing compound catabolic process	http://amigo.geneontology.org/amigo/term/GO:0072526	SARM1 NUDT17
0.160494	4	31	3.6269	Eosinophil migration	http://amigo.geneontology.org/amigo/term/GO:0072677	CCL7 CCL2 CCL8 SCG2
0.160494	2	7	8.031	Endothelin receptor signaling pathway	http://amigo.geneontology.org/amigo/term/GO:0086100	EDN1 EDNRB
0.160494	2	7	8.031	Folate transmembrane transport	http://amigo.geneontology.org/amigo/term/GO:0098838	LRP2 FOLR2
0.160494	2	7	8.031	Regulation of membrane repolarization during action potential	http://amigo.geneontology.org/amigo/term/GO:0098903	RNF207 KCNE3
0.160494	4	31	3.6269	Regulation of lymphocyte chemotaxis	http://amigo.geneontology.org/amigo/term/GO:1901623	CCL7 CCL2 CXCL14 CXCL13
0.160494	5	46	3.05527	Positive regulation of pri-miRNA transcription by RNA polymerase II	http://amigo.geneontology.org/amigo/term/GO:1902895	SPI1 SMAD6 FGF2 APLN JUN
0.160494	2	7	8.031	Regulation of bone development	http://amigo.geneontology.org/amigo/term/GO:1903010	LOX RGN
0.160494	2	7	8.031	Positive regulation of vascular associated smooth muscle cell apoptotic process	http://amigo.geneontology.org/amigo/term/GO:1905461	SOD2 E2F3
0.160494	5	46	3.05527	Regulation of macrophage migration	http://amigo.geneontology.org/amigo/term/GO:1905521	CD200 SLAMF8 C3AR1 CSF1R C5AR1
0.160494	2	7	8.031	Dorsal root ganglion development	http://amigo.geneontology.org/amigo/term/GO:1990791	RGS4 TUBB3
0.160649	10	136	2.0668	Response to organophosphorus	http://amigo.geneontology.org/amigo/term/GO:0046683	ABCC9 P2RX7 AQP9 PIK3CG ALDH3A1 P2RX3 SPARC CDO1 GPD1 JUN
0.160672	7	80	2.45949	T cell differentiation involved in immune response	http://amigo.geneontology.org/amigo/term/GO:0002292	CD86 LOXL3 FGL2 IRF4 NFKBIZ FCER1G GPR183
0.160672	7	80	2.45949	Regulation of immunoglobulin production	http://amigo.geneontology.org/amigo/term/GO:0002637	FCGR2B HPX CD86 SASH3 RBP4 SLC15A4 CLCF1
0.160672	7	80	2.45949	Regulation of bone mineralization	http://amigo.geneontology.org/amigo/term/GO:0030500	P2RX7 MGP ACVR2A PKDCC CCR1 S1PR1 BGLAP
0.161047	30	574	1.46909	T cell activation	http://amigo.geneontology.org/amigo/term/GO:0042110	CD4 BTN3A1 SPI1 FCGR2B APBB1IP PIK3CG MAP3K8 CCL2 CD83 CD86 LOXL3 SASH3 PREX1 FGL2 WDFY4 PTPN22 DOCK2 HAVCR2 GPNMB IRF4 NFKBIZ PIK3R1 VSIG4 FZD7 FCER1G GPR183 CLEC7A DPP4 KIF13B MAFB
0.161214	12	176	1.91649	Biomineralization	http://amigo.geneontology.org/amigo/term/GO:0110148	FGR IBSP SNX10 P2RX7 MGP LOX ACVR2A GPNMB PKDCC CCR1 S1PR1 BGLAP
0.161487	9	117	2.16219	Metencephalon development	http://amigo.geneontology.org/amigo/term/GO:0022037	CNTN1 MYO16 FCGR2B NCOA1 SERPINE2 NLGN4X GBX2 CDK5R1 ABAT
0.163656	6	63	2.677	Excretion	http://amigo.geneontology.org/amigo/term/GO:0007588	EDN1 HMOX1 AQP9 EDNRB CHRNB2 CLN3
0.163656	6	63	2.677	Intracellular pH reduction	http://amigo.geneontology.org/amigo/term/GO:0051452	ATP6V1B2 ATP6V0D2 SLAMF8 ATP6V0E2 AQP11 CLN3
0.164523	3	18	4.68475	T cell activation via T cell receptor contact with antigen bound to MHC molecule on antigen presenting cell	http://amigo.geneontology.org/amigo/term/GO:0002291	APBB1IP FGL2 HAVCR2
0.164523	3	18	4.68475	Female genitalia development	http://amigo.geneontology.org/amigo/term/GO:0030540	LRP2 RBP4 MERTK
0.164523	3	18	4.68475	Negative regulation of fibroblast growth factor receptor signaling pathway	http://amigo.geneontology.org/amigo/term/GO:0040037	SPRY2 FGF2 APLN
0.164523	3	18	4.68475	Dermatan sulfate proteoglycan metabolic process	http://amigo.geneontology.org/amigo/term/GO:0050655	DCN VCAN CSGALNACT1
0.164523	3	18	4.68475	Extracellular regulation of signal transduction	http://amigo.geneontology.org/amigo/term/GO:1900115	LTBP1 FBN1 NRROS
0.164523	3	18	4.68475	Extracellular negative regulation of signal transduction	http://amigo.geneontology.org/amigo/term/GO:1900116	LTBP1 FBN1 NRROS
0.165231	10	137	2.05172	Platelet degranulation	http://amigo.geneontology.org/amigo/term/GO:0002576	HGF SCG3 VEGFA SPARC PLEK A1BG F13A1 CD36 LHFPL2 VEGFD
0.166449	11	157	1.96939	Cold-induced thermogenesis	http://amigo.geneontology.org/amigo/term/GO:0106106	VEGFA PLCL1 APC CD36 TLR4 IRF4 ALDH1A1 SLN KSR2 HOXC10 DIO2
0.166449	11	157	1.96939	Regulation of cold-induced thermogenesis	http://amigo.geneontology.org/amigo/term/GO:0120161	VEGFA PLCL1 APC CD36 TLR4 IRF4 ALDH1A1 SLN KSR2 HOXC10 DIO2
0.167872	7	81	2.42913	Negative regulation of epithelial cell migration	http://amigo.geneontology.org/amigo/term/GO:0010633	DCN GADD45A FGF2 SLIT2 CXCL13 PTPRM EVL
0.17211	4	32	3.51356	Motor neuron axon guidance	http://amigo.geneontology.org/amigo/term/GO:0008045	NTN1 HOXA2 EGR2 SLIT2
0.17211	6	64	2.63517	Positive regulation of phospholipase activity	http://amigo.geneontology.org/amigo/term/GO:0010518	ADCYAP1R1 CD86 GPR55 HTR2B FGF2 C5AR1
0.17211	6	64	2.63517	Negative regulation of endothelial cell migration	http://amigo.geneontology.org/amigo/term/GO:0010596	DCN GADD45A FGF2 SLIT2 CXCL13 PTPRM
0.17211	4	32	3.51356	Olfactory bulb development	http://amigo.geneontology.org/amigo/term/GO:0021772	NR2E1 DLX2 SLIT2 CSF1R
0.17211	6	64	2.63517	Mast cell activation	http://amigo.geneontology.org/amigo/term/GO:0045576	FGR LCP2 CD84 HMOX1 PIK3CG NPPA
0.17211	4	32	3.51356	Negative regulation of antigen receptor-mediated signaling pathway	http://amigo.geneontology.org/amigo/term/GO:0050858	FCGR2B LPXN GBP1 PTPN22
0.17211	4	32	3.51356	Negative regulation of intrinsic apoptotic signaling pathway in response to DNA damage	http://amigo.geneontology.org/amigo/term/GO:1902230	CXCL12 SNAI1 ACKR3 TAF9B
0.172672	13	199	1.83623	Tumor necrosis factor production	http://amigo.geneontology.org/amigo/term/GO:0032640	CD33 MMP8 SASH3 LBP AKAP12 PTPN22 HAVCR2 CD36 GPNMB TLR4 PIK3R1 CLEC7A TLR1
0.172672	13	199	1.83623	Regulation of tumor necrosis factor production	http://amigo.geneontology.org/amigo/term/GO:0032680	CD33 MMP8 SASH3 LBP AKAP12 PTPN22 HAVCR2 CD36 GPNMB TLR4 PIK3R1 CLEC7A TLR1
0.172792	8	100	2.24868	Body fluid secretion	http://amigo.geneontology.org/amigo/term/GO:0007589	EDN1 NCOA1 VEGFA CDO1 CHRM3 PAM APLN SLC22A4
0.172792	25	463	1.51774	Cell junction assembly	http://amigo.geneontology.org/amigo/term/GO:0034329	VMP1 NTN1 PCDHB4 EPB41L3 CORO2B VEGFA CDH6 PCDHB10 PCDHB14 SNAI1 APLNR APC CDH11 NLGN4X PTPRO FZD1 CHRNB2 LRRTM1 DCHS1 CTNND2 GAP43 PEAK1 LRRN1 SLITRK2 APOD
0.175622	7	82	2.39951	Neural crest cell development	http://amigo.geneontology.org/amigo/term/GO:0014032	SOX8 EDN1 SEMA5B RDH10 HTR2B EDNRB GBX2
0.175622	7	82	2.39951	Vasoconstriction	http://amigo.geneontology.org/amigo/term/GO:0042310	EDN1 CHRM3 HTR2B EDNRB GRIP2 ADRA2A APLN
0.179369	5	48	2.92797	Regulation of neuronal synaptic plasticity	http://amigo.geneontology.org/amigo/term/GO:0048168	NCDN CAMK2A EGR2 GRIK2 CLN3
0.182033	19	330	1.61837	Regulation of cell morphogenesis	http://amigo.geneontology.org/amigo/term/GO:0022604	FGR ARHGAP15 EPB41L3 CACNG7 CCL7 CCL2 VEGFA SPARC RND3 GBP1 PREX1 UNC13A POSTN PLXNC1 SYT2 FGD2 FMNL2 CSF1R PLXNB3
0.184445	3	19	4.43819	Macrophage activation involved in immune response	http://amigo.geneontology.org/amigo/term/GO:0002281	LBP HAVCR2 SUCNR1
0.184445	3	19	4.43819	G protein-coupled acetylcholine receptor signaling pathway	http://amigo.geneontology.org/amigo/term/GO:0007213	CHRM3 CDK5R1 CHRM4
0.184445	3	19	4.43819	Negative regulation of platelet activation	http://amigo.geneontology.org/amigo/term/GO:0010544	ALOX12 SERPINE2 ABAT
0.184445	3	19	4.43819	Removal of superoxide radicals	http://amigo.geneontology.org/amigo/term/GO:0019430	MT3 SOD2 CD36
0.184445	7	83	2.3706	Positive regulation of interleukin-8 production	http://amigo.geneontology.org/amigo/term/GO:0032757	TLR8 LBP CHI3L1 TLR4 CLEC7A TLR1 TLR7
0.184445	3	19	4.43819	Middle ear morphogenesis	http://amigo.geneontology.org/amigo/term/GO:0042474	EDN1 HOXA2 NKX3-2
0.184445	3	19	4.43819	Negative regulation of macrophage activation	http://amigo.geneontology.org/amigo/term/GO:0043031	FCGR2B CD200 VSIG4
0.184445	3	19	4.43819	Negative regulation of vascular permeability	http://amigo.geneontology.org/amigo/term/GO:0043116	VEGFA AKAP12 SLIT2
0.184445	7	83	2.3706	Cellular extravasation	http://amigo.geneontology.org/amigo/term/GO:0045123	PIK3CG CXCL12 CCL2 BST1 ITGA4 PLVAP ITGB7
0.184445	3	19	4.43819	Branch elongation of an epithelium	http://amigo.geneontology.org/amigo/term/GO:0060602	FGF1 RDH10 SPRY2
0.184959	23	421	1.53562	Cellular response to peptide	http://amigo.geneontology.org/amigo/term/GO:1901653	PDK4 CAMK2A FCGR2B EDN1 SRSF5 NAMPT GHR KAT2B ITGA4 PTPN22 APC CD36 TLR4 CPEB2 PIK3R1 ATP6V1B2 ATP6V0D2 KLF15 FBN1 ATP6V0E2 GPR173 SOCS3 BGLAP
0.185128	4	33	3.40709	Myeloid dendritic cell activation	http://amigo.geneontology.org/amigo/term/GO:0001773	SPI1 DOCK2 HAVCR2 IRF4
0.185128	4	33	3.40709	Aortic valve morphogenesis	http://amigo.geneontology.org/amigo/term/GO:0003180	SNAI1 SMAD6 SLIT2 NPPA
0.185128	4	33	3.40709	Nitric oxide mediated signal transduction	http://amigo.geneontology.org/amigo/term/GO:0007263	RASD1 VEGFA CD36 FPR1
0.185128	4	33	3.40709	Positive regulation of Rho protein signal transduction	http://amigo.geneontology.org/amigo/term/GO:0035025	GPR55 LPAR6 GPR65 COL3A1
0.185128	4	33	3.40709	Fluid transport	http://amigo.geneontology.org/amigo/term/GO:0042044	EDN1 AQP9 EDNRB AQP11
0.186239	9	121	2.09072	Collagen fibril organization	http://amigo.geneontology.org/amigo/term/GO:0030199	LOX LOXL3 CYP1B1 LUM ACAN COL3A1 COL4A3 COL8A2 COL25A1
0.186973	8	102	2.20459	B cell proliferation	http://amigo.geneontology.org/amigo/term/GO:0042100	FCGR2B BST1 SASH3 CD180 TLR4 CHRNB2 GPR183 CLCF1
0.186973	8	102	2.20459	Regulation of actomyosin structure organization	http://amigo.geneontology.org/amigo/term/GO:0110020	EDN1 CORO2B GPR65 TMEFF2 PIK3R1 S1PR1 SYNPO EVL
0.188455	10	141	1.99351	Regulation of JNK cascade	http://amigo.geneontology.org/amigo/term/GO:0046328	FCGR2B GADD45A MMP8 EDA2R PTPN22 TLR4 FZD7 GRIK2 DACT1 NPPA
0.188455	10	141	1.99351	Cardiac conduction	http://amigo.geneontology.org/amigo/term/GO:0061337	ABCC9 KCND1 CACNG7 KCNIP2 FXYD6 KCNE4 RNF207 NPR2 NPPA KCNE3
0.189412	5	49	2.86822	Positive regulation of lymphocyte migration	http://amigo.geneontology.org/amigo/term/GO:2000403	CXCL12 CCL7 ITGA4 CXCL14 CXCL13
0.189509	24	446	1.51257	Regulation of cell growth	http://amigo.geneontology.org/amigo/term/GO:0001558	CDK11A IL17RB NTN1 EDN1 EPB41L3 SEMA5B MT3 CACNG7 CXCL12 VEGFA RGS4 UNC13A SERPINE2 SYT2 SLIT2 DISC1 FRZB FBP1 NPPA CDK5R1 ZC3H12D RGMA TAF9B EGLN2
0.189509	2	8	7.02713	Leukocyte chemotaxis involved in inflammatory response	http://amigo.geneontology.org/amigo/term/GO:0002232	LBP SLAMF8
0.189509	8	103	2.18319	Regulation of systemic arterial blood pressure	http://amigo.geneontology.org/amigo/term/GO:0003073	EDN1 CORO2B SOD2 CHRM3 POSTN PTPRO NPPA SUCNR1
0.189509	2	8	7.02713	Valine metabolic process	http://amigo.geneontology.org/amigo/term/GO:0006573	ALDH6A1 ACAD8
0.189509	2	8	7.02713	Adenylate cyclase-inhibiting G protein-coupled acetylcholine receptor signaling pathway	http://amigo.geneontology.org/amigo/term/GO:0007197	CHRM3 CHRM4
0.189509	2	8	7.02713	Toll signaling pathway	http://amigo.geneontology.org/amigo/term/GO:0008063	PELI2 NLRP12
0.189509	6	66	2.55532	Glial cell migration	http://amigo.geneontology.org/amigo/term/GO:0008347	VCAN CCL2 NR2E1 DISC1 GPR183 CDK5R1
0.189509	2	8	7.02713	Cellular water homeostasis	http://amigo.geneontology.org/amigo/term/GO:0009992	AQP11 CLN3
0.189509	2	8	7.02713	Glycerol transport	http://amigo.geneontology.org/amigo/term/GO:0015793	AQP9 AQP11
0.189509	2	8	7.02713	Fusion of virus membrane with host plasma membrane	http://amigo.geneontology.org/amigo/term/GO:0019064	CD4 CCR5
0.189509	2	8	7.02713	Taurine metabolic process	http://amigo.geneontology.org/amigo/term/GO:0019530	GHR CDO1
0.189509	2	8	7.02713	Alkanesulfonate metabolic process	http://amigo.geneontology.org/amigo/term/GO:0019694	GHR CDO1
0.189509	6	66	2.55532	Proteoglycan biosynthetic process	http://amigo.geneontology.org/amigo/term/GO:0030166	DCN VCAN HS3ST3B1 CSGALNACT1 ACAN CYTL1
0.189509	9	122	2.07358	Regulation of ossification	http://amigo.geneontology.org/amigo/term/GO:0030278	P2RX7 MGP ACVR2A EGR2 SMAD6 PKDCC CCR1 S1PR1 BGLAP
0.189509	2	8	7.02713	Oxygen homeostasis	http://amigo.geneontology.org/amigo/term/GO:0032364	SOD2 AQP11
0.189509	2	8	7.02713	Response to bacterial lipoprotein	http://amigo.geneontology.org/amigo/term/GO:0032493	CD36 TLR1
0.189509	8	103	2.18319	Positive regulation of interleukin-1 production	http://amigo.geneontology.org/amigo/term/GO:0032732	P2RX7 TLR8 HAVCR2 CD36 TLR4 NLRP12 GBP5 CLEC7A
0.189509	2	8	7.02713	Negative regulation of mast cell activation involved in immune response	http://amigo.geneontology.org/amigo/term/GO:0033007	CD84 HMOX1
0.189509	2	8	7.02713	Behavioral response to nicotine	http://amigo.geneontology.org/amigo/term/GO:0035095	CHRNB2 GRM2
0.189509	2	8	7.02713	Autocrine signaling	http://amigo.geneontology.org/amigo/term/GO:0035425	HILPDA FZD1
0.189509	2	8	7.02713	B cell chemotaxis	http://amigo.geneontology.org/amigo/term/GO:0035754	CH25H CXCL13
0.189509	2	8	7.02713	Membrane fusion involved in viral entry into host cell	http://amigo.geneontology.org/amigo/term/GO:0039663	CD4 CCR5
0.189509	2	8	7.02713	Regulation of development, heterochronic	http://amigo.geneontology.org/amigo/term/GO:0040034	NR2E1 SERPINE2
0.189509	2	8	7.02713	Negative regulation of protein kinase activity by regulation of protein phosphorylation	http://amigo.geneontology.org/amigo/term/GO:0044387	CDK5RAP3 DUSP26
0.189509	2	8	7.02713	Multi-organism membrane fusion	http://amigo.geneontology.org/amigo/term/GO:0044800	CD4 CCR5
0.189509	6	66	2.55532	PH reduction	http://amigo.geneontology.org/amigo/term/GO:0045851	ATP6V1B2 ATP6V0D2 SLAMF8 ATP6V0E2 AQP11 CLN3
0.189509	2	8	7.02713	Negative regulation of B cell receptor signaling pathway	http://amigo.geneontology.org/amigo/term/GO:0050859	FCGR2B LPXN
0.189509	2	8	7.02713	Regulation of mast cell chemotaxis	http://amigo.geneontology.org/amigo/term/GO:0060753	VEGFA VEGFD
0.189509	2	8	7.02713	Cellular response to hydroperoxide	http://amigo.geneontology.org/amigo/term/GO:0071447	CD36 DAPK1
0.189509	2	8	7.02713	Metanephric nephron tubule morphogenesis	http://amigo.geneontology.org/amigo/term/GO:0072282	SOX8 PKD1
0.189509	2	8	7.02713	Negative regulation of monocyte chemotaxis	http://amigo.geneontology.org/amigo/term/GO:0090027	SLIT2 SLAMF8
0.189509	2	8	7.02713	Regulation of lens fiber cell differentiation	http://amigo.geneontology.org/amigo/term/GO:1902746	SPRY2 FGF2
0.189509	2	8	7.02713	Negative regulation of cell maturation	http://amigo.geneontology.org/amigo/term/GO:1903430	EDNRB NPR2
0.189509	2	8	7.02713	Regulation of chaperone-mediated autophagy	http://amigo.geneontology.org/amigo/term/GO:1904714	CTSA PLK3
0.189509	2	8	7.02713	Regulation of epithelial tube formation	http://amigo.geneontology.org/amigo/term/GO:1905276	VEGFA FGF2
0.189509	2	8	7.02713	Positive regulation of epithelial tube formation	http://amigo.geneontology.org/amigo/term/GO:1905278	VEGFA FGF2
0.189627	45	948	1.33426	Regulation of transferase activity	http://amigo.geneontology.org/amigo/term/GO:0051338	FGR PKD1 CD4 HGF LCP2 EDN1 MT3 CD200 PIK3CG CDK5RAP3 VEGFA GHR FGF1 CD86 KAT2B GADD45A RGN CHI3L1 DUSP26 CAMK1 PTPN22 APC HTR2B SPRY2 FGF2 PIK3R5 PIK3R1 FGD2 TTBK1 HMBOX1 ADRA2A PTPRO MERTK SLAMF8 NEK10 GPRC5B LDB2 NPPA CDK5R1 EPM2AIP1 CSF1R SOCS3 C5AR1 LIME1 STRADA
0.190393	16	268	1.67812	Stress-activated protein kinase signaling cascade	http://amigo.geneontology.org/amigo/term/GO:0031098	HGF SPI1 FCGR2B MAP3K8 VEGFA GADD45A MMP8 ARHGEF6 EDA2R PTPN22 TLR4 FZD7 GRIK2 DACT1 CLEC7A NPPA
0.190393	16	268	1.67812	Regulation of I-kappaB kinase/NF-kappaB signaling	http://amigo.geneontology.org/amigo/term/GO:0043122	CD4 CAPN3 HMOX1 EDA2R CD36 HTR2B TLR4 PELI2 NLRP12 LURAP1L SQSTM1 GPRC5B C18orf32 TRIM52 ZDHHC17 LIME1
0.190469	14	225	1.74897	Regulation of synapse organization	http://amigo.geneontology.org/amigo/term/GO:0050807	NTN1 FCGR2B CTTNBP2 SPARC CAMK1 PCDH8 PTPRO CHRNB2 DISC1 LRRTM1 LRRN1 CDK5R1 SLITRK2 CLN3
0.193102	28	541	1.45478	Regulation of lymphocyte activation	http://amigo.geneontology.org/amigo/term/GO:0051249	FGR CD4 FCGR2B MAP3K8 CCL2 BST1 CD83 CD86 LOXL3 SASH3 FGL2 PTPN22 HAVCR2 GPNMB TLR4 IRF4 SLC15A4 NFKBIZ PIK3R1 MERTK SAMSN1 VSIG4 SLAMF8 CHRNB2 GPR183 CLEC7A CLCF1 DPP4
0.193641	4	34	3.30688	Olfactory lobe development	http://amigo.geneontology.org/amigo/term/GO:0021988	NR2E1 DLX2 SLIT2 CSF1R
0.193641	4	34	3.30688	Detection of mechanical stimulus involved in sensory perception	http://amigo.geneontology.org/amigo/term/GO:0050974	CXCL12 SERPINE2 TMC1 CHRNA9
0.193641	4	34	3.30688	Regulation of membrane repolarization	http://amigo.geneontology.org/amigo/term/GO:0060306	KCNE4 RNF207 NPPA KCNE3
0.193641	4	34	3.30688	Modified amino acid transport	http://amigo.geneontology.org/amigo/term/GO:0072337	LRP2 SLC5A6 FOLR2 SLC22A4
0.194829	22	403	1.53446	Alcohol metabolic process	http://amigo.geneontology.org/amigo/term/GO:0006066	PLPP1 ADCYAP1R1 MOXD1 CETP MT3 CYP3A5 FGF1 PLCD4 PLEK RDH10 FMO5 RDH5 GCHFR CYP1B1 CH25H RBP4 FGF2 PLPP3 SGPP2 ALDH1A1 GPD1 SULT1A3
0.194829	10	143	1.96563	Cardiocyte differentiation	http://amigo.geneontology.org/amigo/term/GO:0035051	EDN1 VEGFA RGS4 ALPK3 ABI3BP FZD7 SHOX2 NPPA NEB SOX18
0.194829	5	50	2.81085	Mast cell degranulation	http://amigo.geneontology.org/amigo/term/GO:0043303	FGR CD84 HMOX1 PIK3CG NPPA
0.195933	8	104	2.16219	Regulation of calcium ion transport into cytosol	http://amigo.geneontology.org/amigo/term/GO:0010522	ADCYAP1R1 P2RX7 CAPN3 P2RX3 RAMP3 APLNR LIME1 GSTM2

## Sheet: 2 Upreg Cellular Component
Gene Ontology showing enrichment of cellular component of upregulated differentially expressed genes (DEGs) common to 2 or more patients after 8-day in the perfusion device, treated with 1 µM GSK3368715 vs the DMSO control
Enrichment FDR	nGenes	Pathway Genes	Fold Enrichment	Pathway	URL	Genes
3.25435e-09	129	1965	1.84529	Intrinsic component of plasma membrane	http://amigo.geneontology.org/amigo/term/GO:0031226	PKD1 CD4 CNTN1 TNFRSF9 IL17RB CD84 PLPP1 ABCC9 ASIC4 FCGR2B GPR137B ADCYAP1R1 PCDHB4 P2RX7 CD200 CSF2RB KCND1 HAS3 AQP9 OLFM2 CD33 CACNG7 GLRB P2RX3 CD83 GHR LIFR ITGA4 NCF2 KCNQ4 CD48 CSF3R KCNIP2 GRIA2 PCDHB8 PCDHB10 PCDHB14 CCRL2 ACVR2A RAMP3 HS3ST3B1 EDA2R CHRM3 TSPAN2 SYT6 DAGLA APLNR CD36 GPR55 HTR2B STAB2 PLXNC1 PCDH8 EDNRB GPNMB TLR4 FXYD6 SLC5A6 SLC40A1 VAMP1 ITGB7 LPAR6 GPR65 CD53 FCGR2…
7.23639e-09	123	1881	1.83804	Integral component of plasma membrane	http://amigo.geneontology.org/amigo/term/GO:0005887	PKD1 CD4 TNFRSF9 IL17RB CD84 PLPP1 ABCC9 ASIC4 FCGR2B GPR137B ADCYAP1R1 PCDHB4 P2RX7 CD200 CSF2RB KCND1 HAS3 AQP9 OLFM2 CD33 CACNG7 GLRB P2RX3 CD83 GHR LIFR ITGA4 NCF2 KCNQ4 CSF3R KCNIP2 GRIA2 PCDHB8 PCDHB10 PCDHB14 CCRL2 ACVR2A RAMP3 HS3ST3B1 EDA2R CHRM3 TSPAN2 SYT6 DAGLA APLNR CD36 GPR55 HTR2B STAB2 PLXNC1 PCDH8 EDNRB GPNMB TLR4 FXYD6 SLC5A6 SLC40A1 VAMP1 ITGB7 LPAR6 GPR65 CD53 FCGR2A SLC26A1 N…
1.54357e-06	51	601	2.38525	External encapsulating structure	http://amigo.geneontology.org/amigo/term/GO:0030312	ANOS1 DCN VCAN LTBP1 NTN1 APLP1 ECM2 CXCL12 HPX MGP VEGFA LOX SPARC FGF1 MMP8 A1BG F13A1 CFP FGL2 CHI3L1 POSTN ADAMDEC1 CD180 SERPINE2 LUM TMEFF2 ABI3BP ACAN COLEC12 C1QC LRRTM1 CTSS PTX3 TNFRSF11B SBSPON FBN1 MFAP4 COL3A1 NPNT COL4A3 SERPINB9 COL8A2 FGFBP3 NPPA LRRN1 ADAMTSL1 COL25A1 PRELP LINGO3 TRIL MMP12
1.54357e-06	51	600	2.38922	Extracellular matrix	http://amigo.geneontology.org/amigo/term/GO:0031012	ANOS1 DCN VCAN LTBP1 NTN1 APLP1 ECM2 CXCL12 HPX MGP VEGFA LOX SPARC FGF1 MMP8 A1BG F13A1 CFP FGL2 CHI3L1 POSTN ADAMDEC1 CD180 SERPINE2 LUM TMEFF2 ABI3BP ACAN COLEC12 C1QC LRRTM1 CTSS PTX3 TNFRSF11B SBSPON FBN1 MFAP4 COL3A1 NPNT COL4A3 SERPINB9 COL8A2 FGFBP3 NPPA LRRN1 ADAMTSL1 COL25A1 PRELP LINGO3 TRIL MMP12
2.16203e-05	38	422	2.5311	Receptor complex	http://amigo.geneontology.org/amigo/term/GO:0043235	CD4 APBB1IP ADCYAP1R1 LRP2 CSF2RB OLFM2 CACNG7 P2RX3 GHR LIFR ITGA4 CSF3R GRIA2 ACVR2A RAMP3 CD36 HTR2B PLXNC1 TLR4 ITGB7 GRIK4 ADRA2A NR3C2 MERTK CHRNB2 GRIK2 GPRC5B GFRA2 NPNT GPR160 TLR1 CHRNA9 CSF1R DIABLO TLR7 PLXNB3 LIME1 TRIL
5.50484e-05	65	960	1.90318	Cell surface	http://amigo.geneontology.org/amigo/term/GO:0009986	PKD1 CD4 ANOS1 ADGRA2 BTN3A1 TNFRSF9 FCGR2B FAP ADCYAP1R1 LRP2 CD200 TLR8 CD33 CXCL12 BTN3A3 CD83 VEGFA GHR SPARC LIFR CD86 ITGA4 CSF3R GRIA2 CCRL2 ACVR2A RAMP3 LBP PLVAP HAVCR2 CD36 HILPDA SERPINE2 STAB2 TLR4 ITGB7 CD53 CTSK ACKR3 IQGAP2 PAM NLGN4X FZD1 SLAMF8 FCER1G CHRNB2 CCR5 CCR1 TMC1 FOLR2 GPRC5B GFRA2 S1PR1 CLEC7A NRROS CD163 CD163L1 AQP11 RGMA CSF1R KCNQ3 C5AR1 DPP4 PLXNB3 CLEC5A
0.00103459	35	446	2.20582	Collagen-containing extracellular matrix	http://amigo.geneontology.org/amigo/term/GO:0062023	DCN VCAN LTBP1 NTN1 APLP1 CXCL12 HPX MGP SPARC MMP8 A1BG F13A1 CFP FGL2 POSTN ADAMDEC1 SERPINE2 LUM TMEFF2 ABI3BP ACAN C1QC CTSS SBSPON FBN1 MFAP4 COL3A1 NPNT COL4A3 SERPINB9 COL8A2 FGFBP3 NPPA COL25A1 PRELP
0.00120644	69	1150	1.68651	Secretory vesicle	http://amigo.geneontology.org/amigo/term/GO:0099503	FGR HGF CTSA CTTNBP2 EDN1 MOXD1 SNX10 MT3 CHGB LYZ STX1B ATP8B4 SCG3 CD33 BST1 BIN2 STX2 VEGFA SPARC QPCT NCF2 MMP8 A1BG RAB9B TNFAIP6 F13A1 CFP FGL2 KLK14 UNC13A CHI3L1 SYT6 DOCK2 CD36 HILPDA SERPINE2 RCBTB2 SYTL2 VAMP1 GLIPR1 SLC15A4 DPEP3 SYPL2 CD53 FCGR2A SYT2 LHFPL2 IQGAP2 PAM DOK3 TMEM163 FCER1G DISC1 CTSS PTX3 IQUB VEGFD RAB4B FTH1 MYRIP FPR1 C3AR1 SCG2 CLEC12A HSPA6 FUCA1 CLN3 C5AR1 CLEC5A
0.00200013	32	409	2.1992	External side of plasma membrane	http://amigo.geneontology.org/amigo/term/GO:0009897	CD4 BTN3A1 TNFRSF9 FCGR2B LRP2 TLR8 CD33 CXCL12 BTN3A3 CD83 GHR LIFR CD86 CSF3R GRIA2 CCRL2 CD36 SERPINE2 STAB2 TLR4 CTSK ACKR3 FCER1G CHRNB2 CCR5 CCR1 TMC1 FOLR2 GFRA2 S1PR1 CD163 CD163L1
0.00304139	80	1444	1.55726	Neuron projection	http://amigo.geneontology.org/amigo/term/GO:0043005	SARM1 NCDN ANK1 VCAN CAMK2A FCGR2B CTTNBP2 ADCYAP1R1 LRP2 EPB41L3 NCOA1 MT3 RGS17 CD200 STX1B KCND1 CACNG7 GLRB P2RX3 ITGA4 MARK1 CNN3 GRIA2 PREX1 TMOD2 UNC13A CHRM3 DTNA DAGLA DOCK10 HTR2B PCDH8 CPEB2 GCHFR VAMP1 ADCY10 SYT2 UNC80 GRIP2 PAM NLGN4X CDHR1 PTPRO NRSN1 MERTK SLA KIF5A KCNB1 CHRNB2 DISC1 LRRTM1 GRM2 GRIK2 TMC1 CTNND2 MYRIP NSG2 NPTX1 SYNPO GAP43 PLK3 CHRNA9 KCNE3 CDK5R1 KCNA2 AQP11 C…
0.00304139	80	1443	1.55834	Synapse	http://amigo.geneontology.org/amigo/term/GO:0045202	SARM1 CNTN1 NCDN ANK1 CAMK2A FCGR2B CTTNBP2 PCDHB4 MT3 P2RX7 RGS17 STX1B KCND1 OLFM2 CACNG7 GLRB P2RX3 PPM1H STX2 PHACTR1 SPARC APC2 CNN3 KCNIP2 GRIA2 PCDHB10 PCDHB14 NRN1 TMOD2 UNC13A AKAP12 PNISR CHRM3 POSTN CAMK1 SYT6 DTNA DAGLA DOCK10 HTR2B SERPINE2 PCDH8 CPEB2 FXYD6 VAMP1 CDH11 SYPL2 SYT2 GRIP2 NLGN4X GRIK4 ADRA2A PTPRO TMEM163 SLA KIF5A ACAN KCNB1 C1QC CHRNB2 DISC1 LRRTM1 GRM2 GRIK2 DACT1 C…
0.00457811	58	975	1.6721	Secretory granule	http://amigo.geneontology.org/amigo/term/GO:0030141	FGR HGF CTSA EDN1 MOXD1 SNX10 CHGB LYZ ATP8B4 SCG3 CD33 BST1 BIN2 VEGFA SPARC QPCT NCF2 MMP8 A1BG RAB9B TNFAIP6 F13A1 CFP FGL2 KLK14 CHI3L1 DOCK2 CD36 HILPDA SERPINE2 RCBTB2 VAMP1 GLIPR1 SLC15A4 DPEP3 CD53 FCGR2A SYT2 LHFPL2 IQGAP2 PAM DOK3 FCER1G CTSS PTX3 IQUB VEGFD RAB4B FTH1 MYRIP FPR1 C3AR1 SCG2 CLEC12A HSPA6 FUCA1 C5AR1 CLEC5A
0.00457811	55	913	1.69328	Somatodendritic compartment	http://amigo.geneontology.org/amigo/term/GO:0036477	SARM1 NCDN CAMK2A FCGR2B CTTNBP2 LRP2 MT3 CD200 KCND1 CACNG7 GLRB P2RX3 GHR ITGA4 MARK1 CNN3 GRIA2 PDE1B PREX1 AKAP12 CHRM3 DAGLA DOCK10 HTR2B PCDH8 GCHFR ADCY10 GRIP2 PAM TTBK1 NLGN4X PTPRO NRSN1 SLC25A27 SLA KIF5A KCNB1 GRM2 GRIK2 CTNND2 NSG2 SYNPO GAP43 PLK3 NPPA KCNE3 CDK5R1 KCNA2 AQP11 CHRM4 LRIT3 APOD BGLAP OMP TUBB3
0.00457811	44	677	1.82685	Side of membrane	http://amigo.geneontology.org/amigo/term/GO:0098552	FGR CD4 BTN3A1 ANK1 TNFRSF9 CTSA FCGR2B LRP2 RGS1 TLR8 CD33 CXCL12 BTN3A3 CD83 GHR LIFR CD86 CSF3R GRIA2 CCRL2 PTPN22 DTNA CD36 SERPINE2 STAB2 TLR4 STAC2 CTSK ACKR3 SLA FCER1G CHRNB2 CCR5 CCR1 GEM TMC1 FOLR2 GFRA2 S1PR1 CD163 CD163L1 EPM2AIP1 DIABLO MYZAP
0.00714177	43	674	1.79327	Dendrite	http://amigo.geneontology.org/amigo/term/GO:0030425	SARM1 NCDN CAMK2A FCGR2B CTTNBP2 LRP2 MT3 KCND1 GLRB P2RX3 MARK1 CNN3 GRIA2 PREX1 CHRM3 DAGLA DOCK10 HTR2B PCDH8 GCHFR ADCY10 GRIP2 NLGN4X PTPRO SLA KIF5A KCNB1 GRM2 GRIK2 CTNND2 NSG2 SYNPO GAP43 PLK3 KCNE3 CDK5R1 KCNA2 AQP11 CHRM4 LRIT3 APOD BGLAP TUBB3
0.00714177	43	676	1.78797	Dendritic tree	http://amigo.geneontology.org/amigo/term/GO:0097447	SARM1 NCDN CAMK2A FCGR2B CTTNBP2 LRP2 MT3 KCND1 GLRB P2RX3 MARK1 CNN3 GRIA2 PREX1 CHRM3 DAGLA DOCK10 HTR2B PCDH8 GCHFR ADCY10 GRIP2 NLGN4X PTPRO SLA KIF5A KCNB1 GRM2 GRIK2 CTNND2 NSG2 SYNPO GAP43 PLK3 KCNE3 CDK5R1 KCNA2 AQP11 CHRM4 LRIT3 APOD BGLAP TUBB3
0.00748385	18	194	2.60801	Plasma membrane signaling receptor complex	http://amigo.geneontology.org/amigo/term/GO:0098802	CD4 APBB1IP CSF2RB OLFM2 CACNG7 ITGA4 GRIA2 ACVR2A RAMP3 ITGB7 GRIK4 CHRNB2 GRIK2 NPNT TLR1 CHRNA9 DIABLO LIME1
0.00753741	72	1323	1.52971	Plasma membrane region	http://amigo.geneontology.org/amigo/term/GO:0098590	FGR PKD1 CNTN1 ANK1 LCP2 PLPP1 FAP ADCYAP1R1 LRP2 EPB41L3 STX1B HMOX1 MLC1 KCND1 AQP9 CACNG7 GLRB P2RX3 MS4A4A STX2 APC2 PLEK KCNQ4 GRIA2 PLVAP UNC13A CHRM3 SYT6 DAGLA APC CD36 PCDH8 SPRY2 FXYD6 SLC5A6 SLC40A1 ADCY10 CTSK ACKR3 GRIP2 SLC26A1 FGD2 NLGN4X ATP6V0D2 CDHR1 GRIK4 ADRA2A PTPRO KCNE4 DAB2 KCNB1 CHRNB2 PLPP3 LRRTM1 BBS5 SLC15A2 GRM2 GRIK2 BEST1 CAVIN4 GAP43 CHRNA9 KCNA2 CHRM4 AP1S2 SPATA1…
0.0085342	29	401	2.03278	Synaptic membrane	http://amigo.geneontology.org/amigo/term/GO:0097060	CNTN1 ANK1 STX1B KCND1 CACNG7 GLRB P2RX3 STX2 GRIA2 UNC13A CHRM3 SYT6 DAGLA PCDH8 FXYD6 GRIP2 NLGN4X GRIK4 PTPRO KCNB1 CHRNB2 LRRTM1 GRM2 GRIK2 CHRNA9 KCNA2 CHRM4 SLITRK2 ZDHHC17
0.00956445	12	104	3.24329	Potassium channel complex	http://amigo.geneontology.org/amigo/term/GO:0034705	ABCC9 KCND1 KCNQ4 KCNIP2 GRIK4 KCNE4 KCNB1 GRIK2 KCNAB3 KCNE3 KCNA2 KCNQ3
0.00956445	16	167	2.69303	Intrinsic component of synaptic membrane	http://amigo.geneontology.org/amigo/term/GO:0099240	CNTN1 CACNG7 P2RX3 CHRM3 SYT6 DAGLA PCDH8 FXYD6 GRIK4 PTPRO CHRNB2 LRRTM1 GRM2 CHRNA9 KCNA2 SLITRK2
0.0106061	15	153	2.75574	Integral component of synaptic membrane	http://amigo.geneontology.org/amigo/term/GO:0099699	CACNG7 P2RX3 CHRM3 SYT6 DAGLA PCDH8 FXYD6 GRIK4 PTPRO CHRNB2 LRRTM1 GRM2 CHRNA9 KCNA2 SLITRK2
0.0113684	3	5	16.8651	Phosphatidylinositol 3-kinase complex, class I	http://amigo.geneontology.org/amigo/term/GO:0097651	PIK3CG PIK3R5 PIK3R1
0.0133242	13	125	2.92328	Intrinsic component of postsynaptic membrane	http://amigo.geneontology.org/amigo/term/GO:0098936	CNTN1 CACNG7 CHRM3 DAGLA PCDH8 FXYD6 GRIK4 PTPRO CHRNB2 LRRTM1 GRM2 CHRNA9 SLITRK2
0.01975	41	682	1.68981	Postsynapse	http://amigo.geneontology.org/amigo/term/GO:0098794	CNTN1 NCDN ANK1 CAMK2A FCGR2B CTTNBP2 MT3 P2RX7 KCND1 CACNG7 GLRB P2RX3 APC2 CNN3 GRIA2 CHRM3 CAMK1 DAGLA DOCK10 PCDH8 FXYD6 GRIP2 NLGN4X GRIK4 PTPRO SLA KCNB1 C1QC CHRNB2 DISC1 LRRTM1 GRM2 GRIK2 CTNND2 SYNPO GAP43 CHRNA9 CDK5R1 CHRM4 SLITRK2 NEFL
0.0232667	14	151	2.60609	Presynaptic membrane	http://amigo.geneontology.org/amigo/term/GO:0042734	CNTN1 STX1B P2RX3 STX2 UNC13A CHRM3 PCDH8 FXYD6 GRIK4 CHRNB2 GRM2 GRIK2 KCNA2 ZDHHC17
0.0232667	22	297	2.08211	Postsynaptic membrane	http://amigo.geneontology.org/amigo/term/GO:0045211	CNTN1 ANK1 KCND1 CACNG7 GLRB GRIA2 CHRM3 DAGLA PCDH8 FXYD6 GRIP2 NLGN4X GRIK4 PTPRO KCNB1 CHRNB2 LRRTM1 GRM2 GRIK2 CHRNA9 CHRM4 SLITRK2
0.0234489	25	357	1.96838	Secretory granule membrane	http://amigo.geneontology.org/amigo/term/GO:0030667	MOXD1 ATP8B4 SCG3 CD33 BST1 SPARC RAB9B CD36 VAMP1 GLIPR1 SLC15A4 CD53 FCGR2A SYT2 LHFPL2 IQGAP2 PAM DOK3 FCER1G RAB4B FPR1 C3AR1 CLEC12A C5AR1 CLEC5A
0.0234489	12	119	2.83447	Integral component of postsynaptic membrane	http://amigo.geneontology.org/amigo/term/GO:0099055	CACNG7 CHRM3 DAGLA PCDH8 FXYD6 GRIK4 PTPRO CHRNB2 LRRTM1 GRM2 CHRNA9 SLITRK2
0.0263866	11	105	2.9447	Collagen trimer	http://amigo.geneontology.org/amigo/term/GO:0005581	DCN LOX CD36 LUM COLEC12 C1QC COL3A1 COL4A3 COL8A2 C1QL4 COL25A1
0.0268872	23	324	1.99536	Ion channel complex	http://amigo.geneontology.org/amigo/term/GO:0034702	PKD1 ABCC9 KCND1 OLFM2 CACNG7 GLRB KCNQ4 KCNIP2 GRIA2 UNC80 GRIK4 KCNE4 MICU3 KCNB1 CHRNB2 GRIK2 BEST1 KCNAB3 CHRNA9 KCNE3 KCNA2 KCNQ3 LRRC8B
0.0268872	17	209	2.28634	Tertiary granule	http://amigo.geneontology.org/amigo/term/GO:0070820	LYZ ATP8B4 CD33 QPCT MMP8 TNFAIP6 CFP VAMP1 CD53 DOK3 FCER1G CTSS PTX3 FTH1 FPR1 CLEC12A CLEC5A
0.0295833	17	212	2.25398	Specific granule	http://amigo.geneontology.org/amigo/term/GO:0042581	LYZ ATP8B4 CD33 BST1 QPCT MMP8 CFP CHI3L1 DOCK2 CD36 VAMP1 SLC15A4 CD53 PTX3 C3AR1 CLEC12A CLEC5A
0.029684	23	328	1.97102	Extrinsic component of membrane	http://amigo.geneontology.org/amigo/term/GO:0019898	FGR SARM1 SNX10 RGS1 PIK3CG BST1 CDH6 APC2 SYT6 DTNA APC SERPINE2 SYTL2 CDH11 PIK3R5 STAC2 PIK3R1 SLA DCHS1 HID1 GFRA2 SOCS3 MYZAP
0.0349233	5	26	5.40548	Endolysosome	http://amigo.geneontology.org/amigo/term/GO:0036019	TLR8 SLC15A4 CTSK CTSS TLR7
0.0384195	18	238	2.12585	Cation channel complex	http://amigo.geneontology.org/amigo/term/GO:0034703	PKD1 ABCC9 KCND1 OLFM2 CACNG7 KCNQ4 KCNIP2 GRIA2 UNC80 GRIK4 KCNE4 MICU3 KCNB1 GRIK2 KCNAB3 KCNE3 KCNA2 KCNQ3
0.0409913	11	114	2.71222	Lysosomal lumen	http://amigo.geneontology.org/amigo/term/GO:0043202	DCN VCAN GALC CTSA LUM CTSK ACAN CTSS NSG2 FUCA1 PRELP
0.0409913	8	67	3.35624	Tertiary granule lumen	http://amigo.geneontology.org/amigo/term/GO:1904724	LYZ QPCT MMP8 TNFAIP6 CFP CTSS PTX3 FTH1
0.0416996	14	167	2.3564	Perikaryon	http://amigo.geneontology.org/amigo/term/GO:0043204	NCDN PAM KIF5A KCNB1 GRIK2 CTNND2 SYNPO GAP43 NPPA KCNE3 CDK5R1 KCNA2 LRIT3 BGLAP
0.0478106	32	535	1.68126	Neuronal cell body	http://amigo.geneontology.org/amigo/term/GO:0043025	NCDN CD200 KCND1 CACNG7 P2RX3 GHR ITGA4 CNN3 GRIA2 PDE1B AKAP12 ADCY10 PAM TTBK1 NRSN1 SLC25A27 KIF5A KCNB1 GRIK2 CTNND2 SYNPO GAP43 PLK3 NPPA KCNE3 CDK5R1 KCNA2 LRIT3 APOD BGLAP OMP TUBB3
0.0481293	3	9	9.3695	Cholinergic synapse	http://amigo.geneontology.org/amigo/term/GO:0098981	CHRNB2 CHRNA9 NEFL
0.0542195	2	3	18.739	Phosphatidylinositol 3-kinase complex, class IA	http://amigo.geneontology.org/amigo/term/GO:0005943	PIK3CG PIK3R1
0.0575119	4	19	5.91758	Secondary lysosome	http://amigo.geneontology.org/amigo/term/GO:0005767	NCF2 SQSTM1 FTH1 CLN3
0.0708475	11	125	2.47355	Plasma membrane raft	http://amigo.geneontology.org/amigo/term/GO:0044853	LCP2 PLPP1 ADCYAP1R1 HMOX1 MLC1 MS4A4A PLVAP CD36 CHRNB2 CAVIN4 CLN3
0.0784846	3	11	7.66596	Microfibril	http://amigo.geneontology.org/amigo/term/GO:0001527	LTBP1 FBN1 MFAP4
0.0784846	8	77	2.92036	Cytoplasmic microtubule	http://amigo.geneontology.org/amigo/term/GO:0005881	APC2 APC MAPRE2 HID1 TOGARAM2 TTC30A C4orf47 MAP10
0.0784846	5	33	4.25886	Catenin complex	http://amigo.geneontology.org/amigo/term/GO:0016342	CDH6 APC2 APC CDH11 DCHS1
0.0804222	9	94	2.69124	Voltage-gated potassium channel complex	http://amigo.geneontology.org/amigo/term/GO:0008076	KCND1 KCNQ4 KCNIP2 KCNE4 KCNB1 KCNAB3 KCNE3 KCNA2 KCNQ3
0.087196	2	4	14.0543	Phosphatidylinositol 3-kinase complex, class IB	http://amigo.geneontology.org/amigo/term/GO:0005944	PIK3CG PIK3R5
0.087196	4	22	5.11064	Lamellipodium membrane	http://amigo.geneontology.org/amigo/term/GO:0031258	FAP APC2 KCNA2 DPP4
0.087196	2	4	14.0543	Kainate selective glutamate receptor complex	http://amigo.geneontology.org/amigo/term/GO:0032983	GRIK4 GRIK2
0.0891333	9	97	2.60801	Basement membrane	http://amigo.geneontology.org/amigo/term/GO:0005604	NTN1 APLP1 SPARC TMEFF2 ACAN FBN1 NPNT COL4A3 COL8A2
0.0891333	34	614	1.5565	Cell body	http://amigo.geneontology.org/amigo/term/GO:0044297	NCDN FCGR2B CD200 KCND1 CACNG7 P2RX3 GHR ITGA4 CNN3 GRIA2 PDE1B AKAP12 ADCY10 PAM TTBK1 NRSN1 SLC25A27 KIF5A KCNB1 DISC1 GRIK2 CTNND2 SYNPO GAP43 PLK3 NPPA KCNE3 CDK5R1 KCNA2 LRIT3 APOD BGLAP OMP TUBB3
0.0895816	14	189	2.08211	Leading edge membrane	http://amigo.geneontology.org/amigo/term/GO:0031256	FGR ANK1 FAP EPB41L3 APC2 PLEK DAGLA APC SPRY2 FGD2 KCNB1 KCNA2 SPATA13 DPP4
0.100606	15	214	1.97022	Lamellipodium	http://amigo.geneontology.org/amigo/term/GO:0030027	APBB1IP FAP STX2 APC2 ARHGEF6 APC IQGAP2 FGD2 PTPRO PTPRM KCNA2 SPATA13 EVL DPP4 TUBB3
0.100606	3	13	6.48658	Beta-catenin destruction complex	http://amigo.geneontology.org/amigo/term/GO:0030877	APC2 APC DACT1
0.100606	9	100	2.52977	Platelet alpha granule	http://amigo.geneontology.org/amigo/term/GO:0031091	HGF VEGFA SPARC A1BG F13A1 CD36 SERPINE2 LHFPL2 VEGFD
0.100606	26	445	1.64229	Cell leading edge	http://amigo.geneontology.org/amigo/term/GO:0031252	FGR ANK1 APBB1IP FAP EPB41L3 CADM4 STX2 APC2 PLEK ARHGEF6 DAGLA APC SPRY2 TLR4 IQGAP2 FGD2 PTPRO SAMSN1 KCNB1 LDB2 PTPRM KCNA2 SPATA13 EVL DPP4 TUBB3
0.100606	14	193	2.03896	Dendritic spine	http://amigo.geneontology.org/amigo/term/GO:0043197	CAMK2A FCGR2B CTTNBP2 MT3 KCND1 P2RX3 CNN3 GRIA2 DAGLA DOCK10 PTPRO SLA SYNPO CDK5R1
0.100606	3	13	6.48658	Autolysosome	http://amigo.geneontology.org/amigo/term/GO:0044754	SQSTM1 FTH1 CLN3
0.100606	22	360	1.71774	Membrane raft	http://amigo.geneontology.org/amigo/term/GO:0045121	CD4 CNTN1 LCP2 PLPP1 ADCYAP1R1 HMOX1 MLC1 P2RX3 MS4A4A CD48 PLVAP CD36 EDNRB CHRNB2 PLPP3 CAVIN4 S1PR1 TLR1 RGMB KCNE3 CLN3 DPP4
0.100606	22	360	1.71774	Membrane microdomain	http://amigo.geneontology.org/amigo/term/GO:0098857	CD4 CNTN1 LCP2 PLPP1 ADCYAP1R1 HMOX1 MLC1 P2RX3 MS4A4A CD48 PLVAP CD36 EDNRB CHRNB2 PLPP3 CAVIN4 S1PR1 TLR1 RGMB KCNE3 CLN3 DPP4
0.103898	14	196	2.00775	Neuron spine	http://amigo.geneontology.org/amigo/term/GO:0044309	CAMK2A FCGR2B CTTNBP2 MT3 KCND1 P2RX3 CNN3 GRIA2 DAGLA DOCK10 PTPRO SLA SYNPO CDK5R1
0.107904	44	865	1.4298	Lytic vacuole	http://amigo.geneontology.org/amigo/term/GO:0000323	DCN VCAN CP GALC CTSA GPR137B LRP2 LYZ MLC1 TLR8 CLCN7 CPQ NCF2 PLBD1 RAMP3 RAB9B USP6 TM6SF1 GLIPR1 LUM SLC15A4 SLC46A3 CTSK ATP6V1B2 ATP6V0D2 DAB2 ACAN SQSTM1 CTSS FTH1 SPNS1 NSG2 FPR1 ATP6V0E2 C3AR1 NPPA FUCA1 SLC26A11 AP1S2 CLN3 PRELP TLR7 DPP4 GLMP
0.107904	44	865	1.4298	Lysosome	http://amigo.geneontology.org/amigo/term/GO:0005764	DCN VCAN CP GALC CTSA GPR137B LRP2 LYZ MLC1 TLR8 CLCN7 CPQ NCF2 PLBD1 RAMP3 RAB9B USP6 TM6SF1 GLIPR1 LUM SLC15A4 SLC46A3 CTSK ATP6V1B2 ATP6V0D2 DAB2 ACAN SQSTM1 CTSS FTH1 SPNS1 NSG2 FPR1 ATP6V0E2 C3AR1 NPPA FUCA1 SLC26A11 AP1S2 CLN3 PRELP TLR7 DPP4 GLMP
0.109657	2	5	11.2434	Lipopolysaccharide receptor complex	http://amigo.geneontology.org/amigo/term/GO:0046696	TLR4 TRIL
0.114757	10	123	2.28524	Specific granule membrane	http://amigo.geneontology.org/amigo/term/GO:0035579	ATP8B4 CD33 BST1 CD36 VAMP1 SLC15A4 CD53 C3AR1 CLEC12A CLEC5A
0.12542	48	973	1.38665	Vacuole	http://amigo.geneontology.org/amigo/term/GO:0005773	DCN VCAN CP GALC VMP1 CTSA GPR137B LRP2 LYZ MLC1 TLR8 RUBCNL CLCN7 CPQ NCF2 PLBD1 RAMP3 RAB9B USP6 TM6SF1 GLIPR1 LUM SLC15A4 SLC46A3 CTSK ATP6V1B2 ATP6V0D2 DAB2 ACAN SQSTM1 CTSS FTH1 SPNS1 NSG2 FPR1 ATP6V0E2 C3AR1 NPPA FUCA1 SLC26A11 AP1S2 CLN3 PRELP TLR7 DPP4 MAP1LC3C PEG3 GLMP
0.12542	13	183	1.99678	Extrinsic component of plasma membrane	http://amigo.geneontology.org/amigo/term/GO:0019897	FGR RGS1 CDH6 APC2 DTNA APC SERPINE2 SYTL2 CDH11 STAC2 SLA DCHS1 MYZAP
0.12542	37	712	1.46069	Plasma membrane protein complex	http://amigo.geneontology.org/amigo/term/GO:0098797	CD4 ABCC9 APBB1IP CSF2RB KCND1 OLFM2 CACNG7 GLRB CDH6 ITGA4 APC2 NCF2 KCNQ4 KCNIP2 GRIA2 ACVR2A RAMP3 APC ITGB7 CDH11 ATP6V0D2 GRIK4 KCNE4 KCNB1 FCER1G CHRNB2 GRIK2 DCHS1 NPNT KCNAB3 TLR1 CHRNA9 KCNE3 KCNA2 DIABLO KCNQ3 LIME1
0.127611	36	691	1.46441	Axon	http://amigo.geneontology.org/amigo/term/GO:0030424	SARM1 ANK1 LRP2 EPB41L3 MT3 CD200 STX1B CACNG7 P2RX3 ITGA4 PREX1 TMOD2 UNC13A CHRM3 DTNA DAGLA ADCY10 SYT2 UNC80 PTPRO NRSN1 KIF5A KCNB1 DISC1 LRRTM1 GRM2 GRIK2 GAP43 CDK5R1 KCNA2 KCNQ3 KIF13B ATL1 OMP TUBB3 NEFL
0.127611	3	15	5.6217	Wnt signalosome	http://amigo.geneontology.org/amigo/term/GO:1990909	ADGRA2 APC FZD1
0.132777	8	91	2.47108	Caveola	http://amigo.geneontology.org/amigo/term/GO:0005901	PLPP1 ADCYAP1R1 HMOX1 MLC1 PLVAP CD36 CAVIN4 CLN3
0.133663	7	74	2.65891	GABA-ergic synapse	http://amigo.geneontology.org/amigo/term/GO:0098982	GLRB NLGN4X PTPRO ACAN LRRTM1 GAP43 SLITRK2
0.141353	2	6	9.3695	Endolysosome lumen	http://amigo.geneontology.org/amigo/term/GO:0036021	CTSK CTSS
0.167867	4	30	3.7478	Phosphatidylinositol 3-kinase complex	http://amigo.geneontology.org/amigo/term/GO:0005942	PIK3CG PIK3R5 PIK3R1 SOCS3
0.167867	3	17	4.96032	Endolysosome membrane	http://amigo.geneontology.org/amigo/term/GO:0036020	TLR8 SLC15A4 TLR7
0.175731	7	79	2.49063	Intrinsic component of presynaptic membrane	http://amigo.geneontology.org/amigo/term/GO:0098889	CNTN1 P2RX3 CHRM3 FXYD6 GRIK4 CHRNB2 KCNA2
0.182404	21	368	1.60402	Cell projection membrane	http://amigo.geneontology.org/amigo/term/GO:0031253	FGR PKD1 ANK1 FAP LRP2 EPB41L3 APC2 PLEK DAGLA APC CD36 SPRY2 SLC5A6 FGD2 CDHR1 KCNB1 BBS5 GAP43 KCNA2 SPATA13 DPP4
0.192706	5	47	2.99027	Ionotropic glutamate receptor complex	http://amigo.geneontology.org/amigo/term/GO:0008328	OLFM2 CACNG7 GRIA2 GRIK4 GRIK2
0.192706	17	283	1.6885	Basal part of cell	http://amigo.geneontology.org/amigo/term/GO:0045178	PKD1 ANK1 FAP EDN1 MLC1 AQP9 STX2 KCNQ4 CHRM3 SLC5A6 SLC40A1 ADCY10 SLC26A1 ADRA2A PLPP3 BEST1 C5AR1

## Sheet: 3 Upreg Molecular Function
Gene Ontology showing enrichment of Molecular Function of upregulated differentially expressed genes (DEGs) common to 2 or more patients after 8-day in the perfusion device, treated with 1 µM GSK3368715 vs the DMSO control
Enrichment FDR	nGenes	Pathway Genes	Fold Enrichment	Pathway	URL	Genes
Enrichment FDR	nGenes	Pathway Genes	Fold Enrichment	Pathway	URL	Genes
0.000781718	88	1488	1.66233	RNA polymerase II transcription regulatory region sequence-specific DNA binding	http://amigo.geneontology.org/amigo/term/GO:0000977	SOX8 CALCOCO1 ZNF112 SPI1 ZNF671 NCOA1 ZNF302 TFEC HOXA2 NKX3-2 E2F3 NR2E1 KAT2B ZBTB47 DLX2 EGR2 SNAI1 HOXD11 SOX5 DMTF1 IRF4 ZIC5 NR3C2 ZNF547 ZNF776 SIM2 ZNF382 ZNF577 KLF15 SALL2 ZNF606 ZNF610 ZNF528 GBX2 FOXD4 ZIK1 NHLH1 ZNF570 ZNF596 ZNF621 ZNF680 ZNF491 JUN ZNF154 ZNF571 ZNF594 ZFP3 HOXC10 BHLHE22 SOX2 ZNF329 ZNF708 SATB1 HOXB4 ZNF320 FOXD4L1 ZBTB37 ZNF529 ZNF397 ZSCAN30 ZNF395 FOXD4L3 ZNF…
0.000781718	76	1253	1.70491	RNA polymerase II cis-regulatory region sequence-specific DNA binding	http://amigo.geneontology.org/amigo/term/GO:0000978	SOX8 CALCOCO1 ZNF112 SPI1 ZNF671 ZNF302 TFEC HOXA2 NKX3-2 E2F3 NR2E1 ZBTB47 DLX2 EGR2 SNAI1 HOXD11 SOX5 DMTF1 IRF4 ZIC5 NR3C2 ZNF547 ZNF776 ZNF382 ZNF577 KLF15 SALL2 ZNF606 ZNF610 ZNF528 FOXD4 ZIK1 NHLH1 ZNF570 ZNF621 ZNF680 JUN ZNF154 ZNF571 ZNF594 HOXC10 BHLHE22 SOX2 ZNF708 SATB1 HOXB4 ZNF320 FOXD4L1 ZBTB37 ZNF397 ZSCAN30 ZNF395 FOXD4L3 ZNF626 ZNF793 ZNF527 ZNF493 ZSCAN26 ZNF665 HOXC6 ZNF461 ZN…
0.000781718	85	1446	1.6523	DNA-binding transcription factor activity, RNA polymerase II-specific	http://amigo.geneontology.org/amigo/term/GO:0000981	SOX8 ZNF112 SPI1 ZNF302 TFEC HOXA2 NKX3-2 E2F3 NR2E1 ZBTB47 DLX2 EGR2 SNAI1 HOXD11 SOX5 DMTF1 IRF4 ZIC5 NR3C2 ZNF547 ZNF776 SIM2 ZNF577 KLF15 SALL2 ZNF606 ZNF610 ZNF528 GBX2 SHOX2 FOXD4 ZIK1 NHLH1 ZNF570 ZNF596 ZNF621 ZNF680 ZNF491 JUN ZNF154 ZNF571 ZNF594 ZFP3 HOXC10 BHLHE22 SOX2 ZNF329 ZNF708 SATB1 HOXB4 ZNF320 FOXD4L1 ZBTB37 ZNF529 ZNF397 ZSCAN30 ZNF395 FOXD4L3 ZNF626 ZNF793 ZNF527 ZNF493 ZSCA…
0.000781718	22	186	3.32466	Extracellular matrix structural constituent	http://amigo.geneontology.org/amigo/term/GO:0005201	CD4 ANOS1 DCN VCAN LTBP1 MGP SPARC FGL2 CHI3L1 POSTN LUM ABI3BP ACAN SBSPON FBN1 MFAP4 COL3A1 NPNT COL4A3 COL8A2 COL25A1 PRELP
0.000781718	25	253	2.77752	Glycosaminoglycan binding	http://amigo.geneontology.org/amigo/term/GO:0005539	ANOS1 DCN VCAN APLP1 ECM2 CCL7 CCL8 VEGFA FGF1 TNFAIP6 POSTN SERPINE2 STAB2 GPNMB FGF2 SLIT2 ABI3BP CXCL13 ACAN FBN1 SUSD5 FGFBP3 NELL2 COL25A1 PRELP
0.000781718	19	160	3.33789	Cytokine binding	http://amigo.geneontology.org/amigo/term/GO:0019955	CD4 TNFRSF9 LTBP1 GHR LIFR ITGA4 IL1R2 GBP1 CSF3R CCRL2 CD36 IL18BP FGF2 ACKR3 CCR5 CCR1 NRROS CSF1R ACKR1
0.000881914	76	1272	1.67944	Cis-regulatory region sequence-specific DNA binding	http://amigo.geneontology.org/amigo/term/GO:0000987	SOX8 CALCOCO1 ZNF112 SPI1 ZNF671 ZNF302 TFEC HOXA2 NKX3-2 E2F3 NR2E1 ZBTB47 DLX2 EGR2 SNAI1 HOXD11 SOX5 DMTF1 IRF4 ZIC5 NR3C2 ZNF547 ZNF776 ZNF382 ZNF577 KLF15 SALL2 ZNF606 ZNF610 ZNF528 FOXD4 ZIK1 NHLH1 ZNF570 ZNF621 ZNF680 JUN ZNF154 ZNF571 ZNF594 HOXC10 BHLHE22 SOX2 ZNF708 SATB1 HOXB4 ZNF320 FOXD4L1 ZBTB37 ZNF397 ZSCAN30 ZNF395 FOXD4L3 ZNF626 ZNF793 ZNF527 ZNF493 ZSCAN26 ZNF665 HOXC6 ZNF461 ZN…
0.000881914	87	1515	1.61415	DNA-binding transcription factor activity	http://amigo.geneontology.org/amigo/term/GO:0003700	SOX8 ZNF112 SPI1 ZNF671 ZNF302 TFEC HOXA2 NKX3-2 E2F3 NR2E1 ZBTB47 DLX2 EGR2 SNAI1 HOXD11 SOX5 DMTF1 IRF4 ZIC5 NR3C2 ZNF547 ZNF776 SIM2 ZNF382 ZNF577 KLF15 SALL2 ZNF606 ZNF610 ZNF528 GBX2 SHOX2 FOXD4 ZIK1 NHLH1 ZNF570 ZNF596 ZNF621 ZNF680 ZNF491 JUN ZNF154 ZNF571 ZNF594 ZFP3 HOXC10 BHLHE22 SOX2 ZNF329 ZNF708 SATB1 HOXB4 ZNF320 FOXD4L1 ZBTB37 ZNF529 ZNF397 ZSCAN30 ZNF395 FOXD4L3 ZNF626 ZNF793 ZNF5…
0.000931289	90	1596	1.58507	Transcription cis-regulatory region binding	http://amigo.geneontology.org/amigo/term/GO:0000976	SOX8 CALCOCO1 ZNF112 SPI1 ZNF671 NCOA1 ZNF302 TFEC HOXA2 NKX3-2 E2F3 NR2E1 KAT2B ZBTB47 DLX2 EGR2 SNAI1 HOXD11 SOX5 DMTF1 IRF4 SMAD6 ZIC5 NR3C2 ZNF547 ZNF776 SIM2 ZNF382 ZNF577 KLF15 SALL2 ZNF606 ZNF610 ZNF528 GBX2 FOXD4 ZIK1 NHLH1 ZNF570 ZNF596 ZNF621 ZNF680 ZNF491 JUN ZNF154 ZNF571 ZNF594 ZFP3 HOXC10 BHLHE22 SOX2 ZNF329 ZNF708 SATB1 HOXB4 ZNF320 FOXD4L1 ZBTB37 ZNF529 ZNF397 ZSCAN30 ZNF395 FOXD4…
0.000931289	90	1598	1.58308	Transcription regulatory region nucleic acid binding	http://amigo.geneontology.org/amigo/term/GO:0001067	SOX8 CALCOCO1 ZNF112 SPI1 ZNF671 NCOA1 ZNF302 TFEC HOXA2 NKX3-2 E2F3 NR2E1 KAT2B ZBTB47 DLX2 EGR2 SNAI1 HOXD11 SOX5 DMTF1 IRF4 SMAD6 ZIC5 NR3C2 ZNF547 ZNF776 SIM2 ZNF382 ZNF577 KLF15 SALL2 ZNF606 ZNF610 ZNF528 GBX2 FOXD4 ZIK1 NHLH1 ZNF570 ZNF596 ZNF621 ZNF680 ZNF491 JUN ZNF154 ZNF571 ZNF594 ZFP3 HOXC10 BHLHE22 SOX2 ZNF329 ZNF708 SATB1 HOXB4 ZNF320 FOXD4L1 ZBTB37 ZNF529 ZNF397 ZSCAN30 ZNF395 FOXD4…
0.000931289	93	1660	1.57475	Sequence-specific double-stranded DNA binding	http://amigo.geneontology.org/amigo/term/GO:1990837	SOX8 CALCOCO1 ZNF112 SPI1 ZNF671 NCOA1 ZNF302 TFEC HOXA2 NKX3-2 E2F3 NR2E1 KAT2B ZBTB47 DLX2 EGR2 SNAI1 HOXD11 SOX5 DMTF1 IRF4 SMAD6 ZIC5 HMBOX1 NR3C2 ZNF547 ZNF776 ZNF276 SIM2 ZNF382 ZNF577 KLF15 SALL2 ZNF606 ZNF610 ZNF528 GBX2 SHOX2 FOXD4 ZIK1 NHLH1 ZNF570 ZNF596 ZNF621 ZNF680 ZNF491 JUN ZNF154 ZNF571 ZNF594 ZFP3 HOXC10 BHLHE22 SOX2 ZNF329 ZNF708 SATB1 HOXB4 ZNF320 FOXD4L1 ZBTB37 ZNF529 ZNF397 …
0.00275993	50	770	1.82523	Calcium ion binding	http://amigo.geneontology.org/amigo/term/GO:0005509	SCIN VCAN LTBP1 LRP2 PCDHB4 CAPN3 CABP7 MGP MAN1A1 SPARC CDH6 PLSCR4 PLCD4 KCNIP2 PCDHB8 PCDHB10 PCDHB14 PRRG3 UNC13A RGN SYT6 STAB2 PCDH8 CDH11 SYT2 SLIT2 PAM CDHR1 RASGRP3 MICU3 ACAN TCHH HPGDS FBN1 DCHS1 NPNT S100Z EFCAB12 CDK5R1 MEX3B NELL2 PCDH18 PCDHGC3 PCDHGC5 BGLAP PCDHGC4 PCDHGA5 PCDHGA8 PCDHGA10 MMP12
0.00275993	19	184	2.90251	Heparin binding	http://amigo.geneontology.org/amigo/term/GO:0008201	ANOS1 APLP1 ECM2 CCL7 CCL8 VEGFA FGF1 POSTN SERPINE2 GPNMB FGF2 SLIT2 ABI3BP CXCL13 FBN1 FGFBP3 NELL2 COL25A1 PRELP
0.00492081	94	1775	1.48856	Double-stranded DNA binding	http://amigo.geneontology.org/amigo/term/GO:0003690	SOX8 CALCOCO1 ZNF112 SPI1 ZNF671 NCOA1 ZNF302 TFEC HOXA2 NKX3-2 E2F3 NR2E1 KAT2B ZBTB47 DLX2 EGR2 SNAI1 HOXD11 MAU2 SOX5 DMTF1 IRF4 SMAD6 ZIC5 HMBOX1 NR3C2 ZNF547 ZNF776 ZNF276 SIM2 ZNF382 ZNF577 KLF15 SALL2 ZNF606 ZNF610 ZNF528 GBX2 SHOX2 FOXD4 ZIK1 NHLH1 ZNF570 ZNF596 ZNF621 ZNF680 ZNF491 JUN ZNF154 ZNF571 ZNF594 ZFP3 HOXC10 BHLHE22 SOX2 ZNF329 ZNF708 SATB1 HOXB4 ZNF320 FOXD4L1 ZBTB37 ZNF529 ZN…
0.00576237	91	1722	1.48541	Signaling receptor binding	http://amigo.geneontology.org/amigo/term/GO:0005102	FGR CD4 HGF BTN3A1 IBSP CAMK2A FAP EDN1 FYB1 SEMA5B NCOA1 P2RX7 CHGB STX1B APLP1 CADM4 NAMPT PIK3CG ECM2 CXCL12 CCL7 CCL2 CCL8 BTN3A3 VEGFA FGF1 LIFR PLSCR4 ITGA4 PLCL1 CCRL2 FGL2 LIF LBP DOCK2 CD36 HILPDA SERPINE2 PLXNC1 EDNRB GPNMB RTP4 TLR4 IL18BP SYTL2 SMAD6 FGF2 ITGB7 PROK1 GDF7 GRIP2 SLIT2 PIK3R1 MEGF10 CXCL14 NLGN4X ADRA2A FZD7 SLA CXCL13 FZD1 SQSTM1 PLPP3 ESM1 TNFRSF11B VEGFD FBN1 MFAP4 C…
0.00576237	9	52	4.86493	Coreceptor activity	http://amigo.geneontology.org/amigo/term/GO:0015026	CD4 CD86 ITGA4 ACVR2A RAMP3 ACKR3 CCR5 RGMB RGMA
0.00576237	93	1767	1.4794	Sequence-specific DNA binding	http://amigo.geneontology.org/amigo/term/GO:0043565	SOX8 CALCOCO1 ZNF112 SPI1 ZNF671 NCOA1 ZNF302 TFEC HOXA2 NKX3-2 E2F3 NR2E1 KAT2B ZBTB47 DLX2 EGR2 SNAI1 HOXD11 SOX5 DMTF1 IRF4 SMAD6 ZIC5 HMBOX1 NR3C2 ZNF547 ZNF776 ZNF276 SIM2 ZNF382 ZNF577 KLF15 SALL2 ZNF606 ZNF610 ZNF528 GBX2 SHOX2 FOXD4 ZIK1 NHLH1 ZNF570 ZNF596 ZNF621 ZNF680 ZNF491 JUN ZNF154 ZNF571 ZNF594 ZFP3 HOXC10 BHLHE22 SOX2 ZNF329 ZNF708 SATB1 HOXB4 ZNF320 FOXD4L1 ZBTB37 ZNF529 ZNF397 …
0.00633775	16	152	2.95879	Integrin binding	http://amigo.geneontology.org/amigo/term/GO:0005178	IBSP FAP ECM2 CXCL12 FGF1 ITGA4 GPNMB FGF2 ITGB7 PLPP3 ESM1 FBN1 COL3A1 NPNT COL4A3 FRMD5
0.00710452	9	55	4.59957	Scavenger receptor activity	http://amigo.geneontology.org/amigo/term/GO:0005044	LOXL3 CD36 STAB2 ACKR3 MEGF10 COLEC12 CD163 CD163L1 TMPRSS2
0.00710452	7	33	5.96241	Chemokine binding	http://amigo.geneontology.org/amigo/term/GO:0019956	ITGA4 CCRL2 FGF2 ACKR3 CCR5 CCR1 ACKR1
0.00782584	6	24	7.02713	Pattern recognition receptor activity	http://amigo.geneontology.org/amigo/term/GO:0038187	TLR8 CD36 TLR4 COLEC12 CLEC7A TLR7
0.00917515	14	128	3.07437	Potassium channel activity	http://amigo.geneontology.org/amigo/term/GO:0005267	ABCC9 KCND1 KCNT1 KCNQ4 KCNIP2 GRIK4 KCNE4 KCNK13 KCNB1 GRIK2 KCNAB3 KCNE3 KCNA2 KCNQ3
0.0107363	11	86	3.59527	Cargo receptor activity	http://amigo.geneontology.org/amigo/term/GO:0038024	LOXL3 CD36 STAB2 ACKR3 MEGF10 DAB2 COLEC12 FOLR2 CD163 CD163L1 TMPRSS2
0.0109902	12	101	3.33962	Cytokine receptor activity	http://amigo.geneontology.org/amigo/term/GO:0004896	CD4 IL17RB CSF2RB GHR LIFR IL1R2 CSF3R CCRL2 ACKR3 CCR5 CCR1 GFRA2
0.0119594	4	10	11.2434	IgG binding	http://amigo.geneontology.org/amigo/term/GO:0019864	FCGR2B FCGR2A FCER1G FCGR1B
0.0169118	4	11	10.2213	Complement receptor activity	http://amigo.geneontology.org/amigo/term/GO:0004875	FPR1 C3AR1 FPR3 C5AR1
0.0169118	11	92	3.3608	Voltage-gated potassium channel activity	http://amigo.geneontology.org/amigo/term/GO:0005249	ABCC9 KCND1 KCNT1 KCNQ4 KCNIP2 KCNE4 KCNB1 KCNAB3 KCNE3 KCNA2 KCNQ3
0.0177311	22	280	2.20853	Sulfur compound binding	http://amigo.geneontology.org/amigo/term/GO:1901681	ANOS1 APLP1 ECM2 CCL7 CCL8 VEGFA FGF1 ALDH6A1 POSTN SERPINE2 GPNMB FGF2 SLIT2 ABI3BP CXCL13 FBN1 FGFBP3 NELL2 COL25A1 PRELP GSTM2 SULT1A3
0.0215286	11	96	3.22077	Phosphoric diester hydrolase activity	http://amigo.geneontology.org/amigo/term/GO:0008081	HMOX1 PDE8B PLCD4 PLCL1 PDE1B CHRM3 CCR5 CCR1 SMPDL3A GDPD4 PLCXD3
0.0215286	19	230	2.32201	Immune receptor activity	http://amigo.geneontology.org/amigo/term/GO:0140375	CD4 IL17RB FCGR2B CSF2RB GHR LIFR IL1R2 CSF3R CCRL2 ACKR3 FCER1G CCR5 CCR1 GFRA2 FPR1 C3AR1 FPR3 C5AR1 FCGR1B
0.0278661	25	350	2.00775	Cation channel activity	http://amigo.geneontology.org/amigo/term/GO:0005261	PKD1 ABCC9 ASIC4 P2RX7 KCND1 CACNG7 KCNT1 P2RX3 KCNQ4 KCNIP2 GRIA2 UNC80 GRIK4 KCNE4 KCNK13 SLC24A2 KCNB1 CHRNB2 GRIK2 TMC1 KCNAB3 CHRNA9 KCNE3 KCNA2 KCNQ3
0.0287707	15	166	2.53993	Potassium ion transmembrane transporter activity	http://amigo.geneontology.org/amigo/term/GO:0015079	ABCC9 KCND1 KCNT1 KCNQ4 KCNIP2 GRIK4 KCNE4 KCNK13 SLC24A2 KCNB1 GRIK2 KCNAB3 KCNE3 KCNA2 KCNQ3
0.0287707	4	13	8.64877	Outward rectifier potassium channel activity	http://amigo.geneontology.org/amigo/term/GO:0015271	KCND1 KCNT1 KCNIP2 KCNA2
0.0294178	6	33	5.11064	Excitatory extracellular ligand-gated ion channel activity	http://amigo.geneontology.org/amigo/term/GO:0005231	P2RX7 GLRB P2RX3 CHRNB2 GRIK2 CHRNA9
0.0294178	6	33	5.11064	Delayed rectifier potassium channel activity	http://amigo.geneontology.org/amigo/term/GO:0005251	KCNQ4 KCNE4 KCNB1 KCNE3 KCNA2 KCNQ3
0.0319029	30	459	1.83716	Ion channel activity	http://amigo.geneontology.org/amigo/term/GO:0005216	PKD1 ABCC9 ASIC4 ANO8 P2RX7 KCND1 CLCN7 CACNG7 KCNT1 GLRB P2RX3 KCNQ4 KCNIP2 GRIA2 UNC80 GRIK4 KCNE4 KCNK13 SLC24A2 KCNB1 CHRNB2 GRIK2 TMC1 BEST1 KCNAB3 CHRNA9 KCNE3 KCNA2 KCNQ3 LRRC8B
0.0319029	5	23	6.11055	Extracellular matrix structural constituent conferring compression resistance	http://amigo.geneontology.org/amigo/term/GO:0030021	DCN VCAN LUM ACAN PRELP
0.0354364	94	1940	1.36196	Signaling receptor activity	http://amigo.geneontology.org/amigo/term/GO:0038023	FGR PKD1 CD4 ADGRA2 TNFRSF9 LTBP1 IL17RB ABCC9 FCGR2B ADCYAP1R1 P2RX7 CSF2RB TLR8 PDGFRL CD33 GLRB P2RX3 NR2E1 GHR LIFR CD86 ITGA4 IL1R2 CD48 CSF3R GRIA2 CCRL2 ACVR2A RAMP3 EVI2A EDA2R CHRM3 APLNR CD36 GPR55 HTR2B PLXNC1 EDNRB TLR4 ITGB7 LPAR6 GPR65 FCGR2A ACKR3 NLGN4X GRIK4 ADRA2A PTPRO NR3C2 MERTK FZD7 FZD1 COLEC12 SLAMF8 FCER1G NPR2 CHRNB2 PAQR6 CCR5 PKDCC OXER1 CCR1 GRM2 GRIK2 TNFRSF11B GPR14…
0.0354364	94	1940	1.36196	Molecular transducer activity	http://amigo.geneontology.org/amigo/term/GO:0060089	FGR PKD1 CD4 ADGRA2 TNFRSF9 LTBP1 IL17RB ABCC9 FCGR2B ADCYAP1R1 P2RX7 CSF2RB TLR8 PDGFRL CD33 GLRB P2RX3 NR2E1 GHR LIFR CD86 ITGA4 IL1R2 CD48 CSF3R GRIA2 CCRL2 ACVR2A RAMP3 EVI2A EDA2R CHRM3 APLNR CD36 GPR55 HTR2B PLXNC1 EDNRB TLR4 ITGB7 LPAR6 GPR65 FCGR2A ACKR3 NLGN4X GRIK4 ADRA2A PTPRO NR3C2 MERTK FZD7 FZD1 COLEC12 SLAMF8 FCER1G NPR2 CHRNB2 PAQR6 CCR5 PKDCC OXER1 CCR1 GRM2 GRIK2 TNFRSF11B GPR14…
0.0356742	9	76	3.32864	Collagen binding	http://amigo.geneontology.org/amigo/term/GO:0005518	DCN ECM2 LOX SPARC LUM CTSK ABI3BP CTSS MMP12
0.0356742	32	509	1.76714	Channel activity	http://amigo.geneontology.org/amigo/term/GO:0015267	PKD1 ABCC9 ASIC4 ANO8 P2RX7 KCND1 CLCN7 AQP9 CACNG7 KCNT1 GLRB P2RX3 KCNQ4 KCNIP2 GRIA2 UNC80 GRIK4 KCNE4 KCNK13 SLC24A2 KCNB1 CHRNB2 GRIK2 TMC1 BEST1 KCNAB3 CHRNA9 KCNE3 KCNA2 AQP11 KCNQ3 LRRC8B
0.0356742	5	24	5.85594	C-C chemokine binding	http://amigo.geneontology.org/amigo/term/GO:0019957	CCRL2 ACKR3 CCR5 CCR1 ACKR1
0.0356742	32	509	1.76714	Passive transmembrane transporter activity	http://amigo.geneontology.org/amigo/term/GO:0022803	PKD1 ABCC9 ASIC4 ANO8 P2RX7 KCND1 CLCN7 AQP9 CACNG7 KCNT1 GLRB P2RX3 KCNQ4 KCNIP2 GRIA2 UNC80 GRIK4 KCNE4 KCNK13 SLC24A2 KCNB1 CHRNB2 GRIK2 TMC1 BEST1 KCNAB3 CHRNA9 KCNE3 KCNA2 AQP11 KCNQ3 LRRC8B
0.0356742	25	365	1.92524	Gated channel activity	http://amigo.geneontology.org/amigo/term/GO:0022836	ABCC9 ASIC4 ANO8 P2RX7 KCND1 CLCN7 CACNG7 KCNT1 GLRB P2RX3 KCNQ4 KCNIP2 GRIA2 GRIK4 KCNE4 KCNK13 KCNB1 CHRNB2 GRIK2 TMC1 KCNAB3 CHRNA9 KCNE3 KCNA2 KCNQ3
0.0464844	4	16	7.02713	NAD+ nucleosidase activity	http://amigo.geneontology.org/amigo/term/GO:0003953	SARM1 BST1 TLR4 TLR1
0.0464844	4	16	7.02713	NAD(P)+ nucleosidase activity	http://amigo.geneontology.org/amigo/term/GO:0050135	SARM1 BST1 TLR4 TLR1
0.0464844	4	16	7.02713	NAD+ nucleotidase, cyclic ADP-ribose generating	http://amigo.geneontology.org/amigo/term/GO:0061809	SARM1 BST1 TLR4 TLR1
0.0486535	3	8	10.5407	Sphingosine-1-phosphate phosphatase activity	http://amigo.geneontology.org/amigo/term/GO:0042392	PLPP1 PLPP3 SGPP2
0.0516625	6	39	4.32439	Hydrolase activity, hydrolyzing N-glycosyl compounds	http://amigo.geneontology.org/amigo/term/GO:0016799	SARM1 BST1 TLR4 NEIL1 TLR1 MAN2A2
0.0524054	13	148	2.46899	Voltage-gated cation channel activity	http://amigo.geneontology.org/amigo/term/GO:0022843	ABCC9 KCND1 CACNG7 KCNT1 KCNQ4 KCNIP2 KCNE4 KCNB1 TMC1 KCNAB3 KCNE3 KCNA2 KCNQ3
0.0534034	43	771	1.56766	Inorganic molecular entity transmembrane transporter activity	http://amigo.geneontology.org/amigo/term/GO:0015318	PKD1 ABCC9 ASIC4 ANO8 P2RX7 KCND1 CLCN7 AQP9 CACNG7 KCNT1 GLRB P2RX3 KCNQ4 KCNIP2 GRIA2 SLC5A6 SLC40A1 SLC15A4 UNC80 SLC26A1 ATP6V1B2 ATP6V0D2 GRIK4 KCNE4 KCNK13 SLC24A2 KCNB1 CHRNB2 SLC15A2 GRIK2 SLC13A4 TMC1 BEST1 KCNAB3 ATP6V0E2 CHRNA9 KCNE3 KCNA2 AQP11 SLC26A11 KCNQ3 ZDHHC17 LRRC8B
0.0572439	5	28	5.01938	Hyaluronic acid binding	http://amigo.geneontology.org/amigo/term/GO:0005540	VCAN TNFAIP6 STAB2 ACAN SUSD5
0.062389	13	152	2.40402	Growth factor binding	http://amigo.geneontology.org/amigo/term/GO:0019838	LTBP1 LRP2 GHR LIFR IL1R2 ACVR2A CD36 CXCL13 ESM1 COL3A1 HTRA4 NRROS FGFBP3
0.0635091	5	29	4.84629	Fibronectin binding	http://amigo.geneontology.org/amigo/term/GO:0001968	VEGFA ITGA4 LOXL3 CTSK CTSS
0.0635091	5	29	4.84629	Phosphatidylinositol phospholipase C activity	http://amigo.geneontology.org/amigo/term/GO:0004435	PLCD4 PLCL1 CHRM3 CCR5 CCR1
0.0645257	2	3	18.739	Aldehyde oxidase activity	http://amigo.geneontology.org/amigo/term/GO:0004031	FMO5 AOX1
0.0645257	2	3	18.739	Peptide:proton symporter activity	http://amigo.geneontology.org/amigo/term/GO:0015333	SLC15A4 SLC15A2
0.0645257	2	3	18.739	Oxidoreductase activity, acting on the aldehyde or oxo group of donors, oxygen as acceptor	http://amigo.geneontology.org/amigo/term/GO:0016623	FMO5 AOX1
0.0645257	2	3	18.739	Benzaldehyde dehydrogenase (NAD+) activity	http://amigo.geneontology.org/amigo/term/GO:0018479	ALDH3A1 ALDH1A1
0.0645257	2	3	18.739	Vascular endothelial growth factor receptor 1 binding	http://amigo.geneontology.org/amigo/term/GO:0043183	CADM4 VEGFA
0.0645257	2	3	18.739	Ceramide-1-phosphate phosphatase activity	http://amigo.geneontology.org/amigo/term/GO:0106235	PLPP1 PLPP3
0.0656568	5	30	4.68475	Phospholipase C activity	http://amigo.geneontology.org/amigo/term/GO:0004629	PLCD4 PLCL1 CHRM3 CCR5 CCR1
0.0901193	25	403	1.7437	Phosphoric ester hydrolase activity	http://amigo.geneontology.org/amigo/term/GO:0042578	MTMR11 PLPP1 HMOX1 PALD1 PPM1H EYA4 PDE8B PLCD4 PLCL1 PDE1B CHRM3 DUSP26 PTPN22 PHOSPHO2 PTPRO CCR5 PLPP3 SGPP2 CCR1 FBP1 SMPDL3A PTPRM GDPD4 PLCXD3 DUSP28
0.0905023	70	1446	1.36072	Protein-containing complex binding	http://amigo.geneontology.org/amigo/term/GO:0044877	FGR SCIN GAS7 CD4 DCN HGF ANK1 IBSP MYO16 FCGR2B FAP FYB1 NCOA1 MLC1 CORO2B ECM2 CXCL12 GLRB LOX SPARC FGF1 ITGA4 GBP1 ACVR2A HP1BP3 RPAIN DOCK2 APC CD36 STAB2 GPNMB CPEB2 GCHFR RBP4 FGF2 LUM ITGB7 PIK3R5 FCGR2A CTSK PIK3R1 IQGAP2 MEGF10 HMBOX1 ADRA2A ABI3BP FMNL2 COLEC12 FCER1G CHRNB2 SQSTM1 PLPP3 DISC1 CTSS PTX3 ESM1 SALL2 FBN1 COL3A1 NPNT COL4A3 FRMD5 CDK5R1 JUN NEB TTC30A FCGR1B MAFB MMP12 NE…
0.0980905	8	77	2.92036	Extracellular ligand-gated ion channel activity	http://amigo.geneontology.org/amigo/term/GO:0005230	P2RX7 GLRB P2RX3 GRIA2 GRIK4 CHRNB2 GRIK2 CHRNA9
0.10028	7	62	3.17354	Phosphatidylserine binding	http://amigo.geneontology.org/amigo/term/GO:0001786	SCIN GRAMD1B MARK1 SYT6 SYTL2 SYT2 GAP43
0.10028	9	94	2.69124	Modified amino acid binding	http://amigo.geneontology.org/amigo/term/GO:0072341	SCIN GRAMD1B MARK1 SYT6 SYTL2 SYT2 FOLR2 GAP43 GSTM2
0.106756	2	4	14.0543	N-formyl peptide receptor activity	http://amigo.geneontology.org/amigo/term/GO:0004982	FPR1 FPR3
0.106756	2	4	14.0543	A-type (transient outward) potassium channel activity	http://amigo.geneontology.org/amigo/term/GO:0005250	KCND1 KCNIP2
0.106756	2	4	14.0543	Oxidoreductase activity, acting on paired donors, with incorporation or reduction of molecular oxygen, reduced ascorbate as one donor, and incorporation of one atom of oxygen	http://amigo.geneontology.org/amigo/term/GO:0016715	MOXD1 PAM
0.106756	2	4	14.0543	Benzaldehyde dehydrogenase [NAD(P)+] activity	http://amigo.geneontology.org/amigo/term/GO:0019115	ALDH3A1 ALDH1A1
0.106756	2	4	14.0543	Dipeptide transmembrane transporter activity	http://amigo.geneontology.org/amigo/term/GO:0071916	SLC15A4 SLC15A2
0.111457	15	208	2.02706	Calmodulin binding	http://amigo.geneontology.org/amigo/term/GO:0005516	CAMK2A RGS1 KCNQ4 RGS4 CNN3 PDE1B USP6 UNC13A AKAP12 CAMK1 IQGAP2 GEM GAP43 KCNQ3 DAPK1
0.111457	3	12	7.02713	Secondary active sulfate transmembrane transporter activity	http://amigo.geneontology.org/amigo/term/GO:0008271	SLC26A1 SLC13A4 SLC26A11
0.116345	4	23	4.88844	C-C chemokine receptor activity	http://amigo.geneontology.org/amigo/term/GO:0016493	CCRL2 ACKR3 CCR5 CCR1
0.122249	15	211	1.99824	Voltage-gated ion channel activity	http://amigo.geneontology.org/amigo/term/GO:0005244	ABCC9 KCND1 CLCN7 CACNG7 KCNT1 KCNQ4 KCNIP2 KCNE4 KCNK13 KCNB1 TMC1 KCNAB3 KCNE3 KCNA2 KCNQ3
0.122375	7	66	2.98121	Chemokine activity	http://amigo.geneontology.org/amigo/term/GO:0008009	CXCL12 CCL7 CCL2 CCL8 CXCL14 CXCL13 CXCL8
0.122544	21	335	1.76203	G protein-coupled receptor binding	http://amigo.geneontology.org/amigo/term/GO:0001664	EDN1 APLP1 CXCL12 CCL7 CCL2 CCL8 CCRL2 EDNRB RTP4 PROK1 CXCL14 ADRA2A FZD7 CXCL13 FZD1 GPRC5B CXCL8 S1PR1 FPR1 APLN NPPA
0.122544	15	212	1.98881	Voltage-gated channel activity	http://amigo.geneontology.org/amigo/term/GO:0022832	ABCC9 KCND1 CLCN7 CACNG7 KCNT1 KCNQ4 KCNIP2 KCNE4 KCNK13 KCNB1 TMC1 KCNAB3 KCNE3 KCNA2 KCNQ3
0.127602	7	67	2.93671	Postsynaptic neurotransmitter receptor activity	http://amigo.geneontology.org/amigo/term/GO:0098960	GLRB CHRM3 GRIK4 CHRNB2 GRIK2 CHRNA9 CHRM4
0.12963	27	468	1.62164	DNA-binding transcription activator activity, RNA polymerase II-specific	http://amigo.geneontology.org/amigo/term/GO:0001228	ZNF112 SPI1 TFEC E2F3 NR2E1 DLX2 EGR2 DMTF1 IRF4 KLF15 SALL2 ZNF606 GBX2 NHLH1 JUN ZNF594 HOXC10 SOX2 ZNF395 ZNF493 MDM4 SOX18 MAFB MEF2B YY2 ZNF585B ZNF224
0.130591	6	52	3.24329	Chemoattractant activity	http://amigo.geneontology.org/amigo/term/GO:0042056	HGF VEGFA GPNMB FGF2 VEGFD SCG2
0.141227	6	53	3.1821	Peptide hormone binding	http://amigo.geneontology.org/amigo/term/GO:0017046	ADCYAP1R1 GHR EDNRB SLC40A1 PIK3R1 NPR2
0.143786	27	474	1.60112	DNA-binding transcription activator activity	http://amigo.geneontology.org/amigo/term/GO:0001216	ZNF112 SPI1 TFEC E2F3 NR2E1 DLX2 EGR2 DMTF1 IRF4 KLF15 SALL2 ZNF606 GBX2 NHLH1 JUN ZNF594 HOXC10 SOX2 ZNF395 ZNF493 MDM4 SOX18 MAFB MEF2B YY2 ZNF585B ZNF224
0.143786	2	5	11.2434	Protein-lysine 6-oxidase activity	http://amigo.geneontology.org/amigo/term/GO:0004720	LOX LOXL3
0.143786	2	5	11.2434	Glycerol channel activity	http://amigo.geneontology.org/amigo/term/GO:0015254	AQP9 AQP11
0.143786	2	5	11.2434	Kainate selective glutamate receptor activity	http://amigo.geneontology.org/amigo/term/GO:0015277	GRIK4 GRIK2
0.150498	4	26	4.32439	G protein-coupled chemoattractant receptor activity	http://amigo.geneontology.org/amigo/term/GO:0001637	CCRL2 ACKR3 CCR5 CCR1
0.150498	4	26	4.32439	Chemokine receptor activity	http://amigo.geneontology.org/amigo/term/GO:0004950	CCRL2 ACKR3 CCR5 CCR1
0.150498	34	636	1.50266	Inorganic cation transmembrane transporter activity	http://amigo.geneontology.org/amigo/term/GO:0022890	PKD1 ABCC9 ASIC4 P2RX7 KCND1 CACNG7 KCNT1 P2RX3 KCNQ4 KCNIP2 GRIA2 SLC5A6 SLC40A1 SLC15A4 UNC80 ATP6V1B2 ATP6V0D2 GRIK4 KCNE4 KCNK13 SLC24A2 KCNB1 CHRNB2 SLC15A2 GRIK2 SLC13A4 TMC1 KCNAB3 ATP6V0E2 CHRNA9 KCNE3 KCNA2 KCNQ3 ZDHHC17
0.152631	8	88	2.55532	Hormone binding	http://amigo.geneontology.org/amigo/term/GO:0042562	ADCYAP1R1 LRP2 GHR EDNRB SLC40A1 PIK3R1 NPR2 ALDH1A1
0.165863	4	27	4.16422	G-protein alpha-subunit binding	http://amigo.geneontology.org/amigo/term/GO:0001965	RGS1 PLCD4 RGS4 HTR2B
0.165863	3	15	5.6217	GTPase inhibitor activity	http://amigo.geneontology.org/amigo/term/GO:0005095	CPEB2 SLIT2 IQGAP2
0.165863	4	27	4.16422	Glutamate receptor activity	http://amigo.geneontology.org/amigo/term/GO:0008066	GRIA2 GRIK4 GRM2 GRIK2
0.165863	3	15	5.6217	Voltage-gated potassium channel activity involved in cardiac muscle cell action potential repolarization	http://amigo.geneontology.org/amigo/term/GO:0086008	KCNIP2 KCNE4 KCNE3
0.181252	45	909	1.39151	Ion transmembrane transporter activity	http://amigo.geneontology.org/amigo/term/GO:0015075	PKD1 MPC1 ABCC9 ASIC4 ANO8 P2RX7 KCND1 CLCN7 CACNG7 KCNT1 GLRB P2RX3 KCNQ4 KCNIP2 GRIA2 CD36 SLC5A6 SLC40A1 SLC15A4 UNC80 SLC26A1 ATP6V1B2 ATP6V0D2 GRIK4 KCNE4 KCNK13 SLC24A2 KCNB1 CHRNB2 SLC15A2 GRIK2 SLC13A4 TMC1 BEST1 KCNAB3 ATP6V0E2 CHRNA9 KCNE3 KCNA2 SLC26A11 SLC25A18 KCNQ3 ZDHHC17 LRRC8B SLC22A4
0.18889	3	16	5.27035	Alpha-mannosidase activity	http://amigo.geneontology.org/amigo/term/GO:0004559	MAN1A1 MAN2C1 MAN2A2
0.18889	3	16	5.27035	Vascular endothelial growth factor receptor binding	http://amigo.geneontology.org/amigo/term/GO:0005172	CADM4 VEGFA VEGFD
0.18889	3	16	5.27035	Sulfate transmembrane transporter activity	http://amigo.geneontology.org/amigo/term/GO:0015116	SLC26A1 SLC13A4 SLC26A11
0.18889	3	16	5.27035	Wnt-activated receptor activity	http://amigo.geneontology.org/amigo/term/GO:0042813	PKD1 FZD7 FZD1
0.184376	18	693	1.64473	Cation transmembrane transporter activity	http://amigo.geneontology.org/amigo/term/GO:0008324	ASIC4 KCND1 CACNG7 KCNT1 KCNQ4 KCNIP2 GRIA2 SLC40A1 UNC80 ATP6V0D2 KCNK13 KCNB1 GRIK2 KCNAB3 ATP6V0E2 CHRNA9 KCNE3 KCNA2
0.184376	6	145	2.62023	Ion channel regulator activity	http://amigo.geneontology.org/amigo/term/GO:0099106	CACNG7 KCNIP2 GRM2 GEM KCNAB3 KCNE3
0.186112	2	17	7.44967	Mannosidase activity	http://amigo.geneontology.org/amigo/term/GO:0015923	MAN1A1 MAN2A2
0.186112	2	17	7.44967	Heparan sulfate sulfotransferase activity	http://amigo.geneontology.org/amigo/term/GO:0034483	HS3ST1 HS3ST3B1
0.186112	2	17	7.44967	1-phosphatidylinositol-3-kinase regulator activity	http://amigo.geneontology.org/amigo/term/GO:0046935	PIK3R1 SOCS3

## Sheet: 4 Upreg KEGG
Gene Ontology showing enrichment of KEGG pathways of upregulated differentially expressed genes (DEGs) common to 2 or more patients after 8-day in the perfusion device, treated with 1 µM GSK3368715 vs the DMSO control
Enrichment FDR	nGenes	Pathway Genes	Fold Enrichment	Pathway	URL	Genes
0.000382386	40	495	2.27139	Herpes simplex virus 1 infection	http://www.genome.jp/kegg-bin/show_pathway?hsa05168	ZNF112 ZNF671 ZNF302 SRSF5 CCL2 CFP CASP9 PIK3R1 ZNF547 ZNF382 ZNF577 ZNF606 ZNF610 ZNF528 ZIK1 ZNF570 ZNF596 ZNF621 ZNF680 ZNF154 ZNF571 ZNF708 ZNF320 SOCS3 ZNF529 ZNF793 ZNF527 ZNF665 ZNF461 ZNF181 ZNF334 ZNF583 ZNF879 ZNF737 ZNF709 ZNF585B ZNF432 ZNF10 ZNF253 ZNF224
0.00785833	25	294	2.39018	Cytokine-cytokine receptor interaction	http://www.genome.jp/kegg-bin/show_pathway?hsa04060	CD4 TNFRSF9 IL17RB CSF2RB CXCL12 CCL7 CCL2 CCL8 GHR LIFR IL1R2 CSF3R ACVR2A LIF EDA2R GDF7 ACKR3 CXCL14 CXCL13 CCR5 CCR1 TNFRSF11B CXCL8 CLCF1 CSF1R
0.0291532	26	350	2.08806	Neuroactive ligand-receptor interaction	http://www.genome.jp/kegg-bin/show_pathway?hsa04080	EDN1 ADCYAP1R1 P2RX7 GLRB P2RX3 GHR GRIA2 CHRM3 APLNR HTR2B EDNRB LPAR6 GRIK4 ADRA2A CHRNB2 GRM2 GRIK2 S1PR1 FPR1 APLN C3AR1 CHRNA9 CHRM4 FPR3 C5AR1 ADORA3
0.0291532	11	92	3.3608	Rheumatoid arthritis	http://www.genome.jp/kegg-bin/show_pathway?hsa05323	CXCL12 CCL2 VEGFA CD86 TLR4 CTSK ATP6V1B2 ATP6V0D2 CXCL8 ATP6V0E2 JUN
0.0437053	11	99	3.12317	Viral protein interaction with cytokine and cytokine receptor	http://www.genome.jp/kegg-bin/show_pathway?hsa04061	CXCL12 CCL7 CCL2 CCL8 ACKR3 CXCL14 CXCL13 CCR5 CCR1 CXCL8 CSF1R
0.0507103	11	103	3.00188	Toll-like receptor signaling pathway	http://www.genome.jp/kegg-bin/show_pathway?hsa04620	TLR8 MAP3K8 CD86 LBP TLR4 CTSK PIK3R1 CXCL8 TLR1 JUN TLR7
0.0914797	13	151	2.41994	Phagosome	http://www.genome.jp/kegg-bin/show_pathway?hsa04145	FCGR2B NCF2 CD36 TLR4 FCGR2A ATP6V1B2 ATP6V0D2 COLEC12 CTSS ATP6V0E2 CLEC7A TUBA8 TUBB3
0.0914797	10	100	2.81085	AGE-RAGE signaling pathway in diabetic complications	http://www.genome.jp/kegg-bin/show_pathway?hsa04933	EDN1 CCL2 VEGFA PLCD4 PIK3R1 VEGFD COL3A1 COL4A3 CXCL8 JUN
0.0914797	32	530	1.69712	Pathways in cancer	http://www.genome.jp/kegg-bin/show_pathway?hsa05200	HGF SPI1 CAMK2A EDN1 NCOA1 HMOX1 CSF2RB CXCL12 E2F3 VEGFA FGF1 APC2 GADD45A CSF3R CASP9 APC EDNRB FGF2 LPAR6 PIK3R1 RASGRP3 FZD7 FZD1 VEGFD COL4A3 CXCL8 GSTA4 JUN CSF1R DAPK1 GSTM2 EGLN2
0.0971637	15	191	2.20747	Chemokine signaling pathway	http://www.genome.jp/kegg-bin/show_pathway?hsa04062	FGR PIK3CG CXCL12 CCL7 CCL2 CCL8 PREX1 DOCK2 PIK3R5 PIK3R1 CXCL14 CXCL13 CCR5 CCR1 CXCL8
0.0971637	12	138	2.44422	Fluid shear stress and atherosclerosis	http://www.genome.jp/kegg-bin/show_pathway?hsa05418	EDN1 HMOX1 CCL2 VEGFA IL1R2 NCF2 ACVR2A PIK3R1 MAPK7 GSTA4 JUN GSTM2
0.124195	11	126	2.45392	Osteoclast differentiation	http://www.genome.jp/kegg-bin/show_pathway?hsa04380	LCP2 SPI1 FCGR2B NCF2 FCGR2A CTSK PIK3R1 TNFRSF11B JUN CSF1R SOCS3
0.124769	9	93	2.72018	TGF-beta signaling pathway	http://www.genome.jp/kegg-bin/show_pathway?hsa04350	DCN LTBP1 ACVR2A SMAD6 GDF7 FBN1 ID4 RGMB RGMA
0.149701	6	49	3.44186	Malaria	http://www.genome.jp/kegg-bin/show_pathway?hsa05144	HGF CCL2 CD36 TLR4 CXCL8 ACKR1
0.179804	14	194	2.02845	Kaposi sarcoma-associated herpesvirus infection	http://www.genome.jp/kegg-bin/show_pathway?hsa05167	PIK3CG E2F3 VEGFA CD86 PREX1 CASP9 FGF2 PIK3R5 PIK3R1 CCR5 CCR1 CXCL8 JUN MAP1LC3C
0.179804	7	68	2.89352	Chemical carcinogenesis	http://www.genome.jp/kegg-bin/show_pathway?hsa05204	CYP3A5 HSD11B1 CYP1B1 HPGDS GSTA4 GSTM2 SULT1A3
0.182719	7	69	2.85159	Drug metabolism	http://www.genome.jp/kegg-bin/show_pathway?hsa00982	CYP3A5 ALDH3A1 FMO5 AOX1 HPGDS GSTA4 GSTM2

## Sheet: 5 Downreg Biological Process
Gene Ontology showing enrichment of biological processes of downregulated differentially expressed genes (DEGs) common to 2 or more patients after 8-day in the perfusion device, treated with 1 µM GSK3368715 vs the DMSO control
Enrichment FDR	nGenes	Pathway Genes	Fold Enrichment	Pathway	URL	Genes
2.83661e-32	40	118	14.7753	Cotranslational protein targeting to membrane	http://amigo.geneontology.org/amigo/term/GO:0006613	RPS20 RPL18 RPS5 RPLP0 RPL3 RPS19 RPL18A RPL28 RPS12 RPL24 RPS15 SIL1 RPL21 RPS4Y1 RPL36 RPL27 RPS15A RPL35 RPS6 RPLP1 RPS24 RPS11 RPL13A RPL32 RPS3A RPS3 RPL8 RPL29 RPL9 RPS14 RPL27A RPL13 RPSA RPS21 RPL38 RPL4 RPLP2 RPL12 RPS29 UBA52
3.15647e-32	39	112	15.1776	SRP-dependent cotranslational protein targeting to membrane	http://amigo.geneontology.org/amigo/term/GO:0006614	RPS20 RPL18 RPS5 RPLP0 RPL3 RPS19 RPL18A RPL28 RPS12 RPL24 RPS15 RPL21 RPS4Y1 RPL36 RPL27 RPS15A RPL35 RPS6 RPLP1 RPS24 RPS11 RPL13A RPL32 RPS3A RPS3 RPL8 RPL29 RPL9 RPS14 RPL27A RPL13 RPSA RPS21 RPL38 RPL4 RPLP2 RPL12 RPS29 UBA52
7.95219e-30	39	128	13.2804	Protein targeting to ER	http://amigo.geneontology.org/amigo/term/GO:0045047	RPS20 RPL18 RPS5 RPLP0 RPL3 RPS19 RPL18A RPL28 RPS12 RPL24 RPS15 RPL21 RPS4Y1 RPL36 RPL27 RPS15A RPL35 RPS6 RPLP1 RPS24 RPS11 RPL13A RPL32 RPS3A RPS3 RPL8 RPL29 RPL9 RPS14 RPL27A RPL13 RPSA RPS21 RPL38 RPL4 RPLP2 RPL12 RPS29 UBA52
2.2692e-29	39	132	12.878	Establishment of protein localization to endoplasmic reticulum	http://amigo.geneontology.org/amigo/term/GO:0072599	RPS20 RPL18 RPS5 RPLP0 RPL3 RPS19 RPL18A RPL28 RPS12 RPL24 RPS15 RPL21 RPS4Y1 RPL36 RPL27 RPS15A RPL35 RPS6 RPLP1 RPS24 RPS11 RPL13A RPL32 RPS3A RPS3 RPL8 RPL29 RPL9 RPS14 RPL27A RPL13 RPSA RPS21 RPL38 RPL4 RPLP2 RPL12 RPS29 UBA52
1.78658e-27	39	147	11.5639	Nuclear-transcribed mRNA catabolic process, nonsense-mediated decay	http://amigo.geneontology.org/amigo/term/GO:0000184	RPS20 RPL18 RPS5 RPLP0 RPL3 RPS19 RPL18A RPL28 RPS12 RPL24 RPS15 RPL21 RPS4Y1 RPL36 RPL27 RPS15A RPL35 RPS6 RPLP1 RPS24 RPS11 RPL13A RPL32 RPS3A RPS3 RPL8 RPL29 RPL9 RPS14 RPL27A RPL13 RPSA RPS21 RPL38 RPL4 RPLP2 RPL12 RPS29 UBA52
8.43288e-26	39	162	10.4932	Protein localization to endoplasmic reticulum	http://amigo.geneontology.org/amigo/term/GO:0070972	RPS20 RPL18 RPS5 RPLP0 RPL3 RPS19 RPL18A RPL28 RPS12 RPL24 RPS15 RPL21 RPS4Y1 RPL36 RPL27 RPS15A RPL35 RPS6 RPLP1 RPS24 RPS11 RPL13A RPL32 RPS3A RPS3 RPL8 RPL29 RPL9 RPS14 RPL27A RPL13 RPSA RPS21 RPL38 RPL4 RPLP2 RPL12 RPS29 UBA52
4.06799e-25	39	169	10.0585	Cytoplasmic translation	http://amigo.geneontology.org/amigo/term/GO:0002181	RPS20 RPL18 RPS5 RPLP0 RPL3 RPS19 RPL18A RPL28 RPS12 RPL24 RPS15 RPL21 RPL36 RPL27 RPS15A RPL35 RPS6 RPLP1 RPS24 RPS11 RPL13A RPL32 RPS3A RPS3 RPL8 RPL29 RPL22L1 RPL9 RPS14 RPL27A RPL13 RPSA RPS21 RPL38 RPL4 RPLP2 RPL12 RPS29 UBA52
4.45174e-23	43	241	7.77693	Protein targeting to membrane	http://amigo.geneontology.org/amigo/term/GO:0006612	RPS20 RPL18 RPS5 RPLP0 RPL3 ABCD1 RPS19 RPL18A RPL28 RPS12 RPL24 RPS15 SIL1 RPL21 RPS4Y1 RPL36 RPL27 RPS15A RPL35 RPS6 RPLP1 RPS24 RPS11 RPL13A RPL32 RPS3A RPS3 RPL8 RPL29 RPL9 RPS14 RPL27A RPL13 RPSA RPS21 RPL38 RPL4 RPLP2 CIB1 MYO1C RPL12 RPS29 UBA52
5.56097e-23	41	217	8.23533	Viral transcription	http://amigo.geneontology.org/amigo/term/GO:0019083	RPS20 RPL18 NUCKS1 RPS5 RPLP0 RPL3 RPS19 RPL18A RPL28 RPS12 RPL24 RPS15 RPL21 RPS4Y1 RPL36 RPL27 RPS15A RPL35 RPS6 RPLP1 RPS24 RPS11 RPL13A RPL32 RPS3A RPS3 RPL8 RPL29 RPL9 RPS14 PSMC3 RPL27A RPL13 RPSA RPS21 RPL38 RPL4 RPLP2 RPL12 RPS29 UBA52
5.2263e-21	40	230	7.58035	Translational initiation	http://amigo.geneontology.org/amigo/term/GO:0006413	RPS20 RPL18 RPS5 RPLP0 RPL3 RPS19 RPL18A HSPB1 RPL28 RPS12 RPL24 RPS15 RPL21 RPS4Y1 RPL36 RPL27 RPS15A RPL35 RPS6 RPLP1 RPS24 RPS11 RPL13A RPL32 RPS3A RPS3 RPL8 RPL29 RPL9 RPS14 RPL27A RPL13 RPSA RPS21 RPL38 RPL4 RPLP2 RPL12 RPS29 UBA52
9.32449e-20	53	458	5.04391	MRNA catabolic process	http://amigo.geneontology.org/amigo/term/GO:0006402	RPS20 RPL18 IGF2BP2 RPS5 RPLP0 RPL3 E2F1 RPS19 RPL18A HSPB1 RPL28 RPS12 RPL24 RPS15 RPL21 TRAF2 SEM1 RPS4Y1 RPL36 LSM4 RPL27 RPS15A IGF2BP3 PSMB7 RPL35 RPS6 RPLP1 RPS24 PSMB6 RPS11 RPL13A RPL32 RPS3A RPS3 RPL8 RPL29 RPL9 RPS14 PSMC3 RPL27A RPL13 RPSA RPS21 RPL38 PSMD1 RPL4 RPLP2 PKP3 PSMD13 RPL12 RPS29 UBA52 IKBKE
9.32449e-20	42	278	6.58509	Viral gene expression	http://amigo.geneontology.org/amigo/term/GO:0019080	RPS20 RPL18 NUCKS1 ST6GALNAC2 RPS5 RPLP0 RPL3 RPS19 RPL18A RPL28 RPS12 RPL24 RPS15 RPL21 RPS4Y1 RPL36 RPL27 RPS15A RPL35 RPS6 RPLP1 RPS24 RPS11 RPL13A RPL32 RPS3A RPS3 RPL8 RPL29 RPL9 RPS14 PSMC3 RPL27A RPL13 RPSA RPS21 RPL38 RPL4 RPLP2 RPL12 RPS29 UBA52
2.30678e-19	40	256	6.81047	Nuclear-transcribed mRNA catabolic process	http://amigo.geneontology.org/amigo/term/GO:0000956	RPS20 RPL18 RPS5 RPLP0 RPL3 RPS19 RPL18A RPL28 RPS12 RPL24 RPS15 RPL21 RPS4Y1 RPL36 LSM4 RPL27 RPS15A RPL35 RPS6 RPLP1 RPS24 RPS11 RPL13A RPL32 RPS3A RPS3 RPL8 RPL29 RPL9 RPS14 RPL27A RPL13 RPSA RPS21 RPL38 RPL4 RPLP2 RPL12 RPS29 UBA52
2.30678e-19	51	433	5.1338	Protein targeting	http://amigo.geneontology.org/amigo/term/GO:0006605	RPS20 RPL18 RPS5 RPLP0 TIMM13 TSPO RPL3 ABCD1 RPS19 RPL18A RPL28 RPS12 RPL24 RPS15 SIL1 RPL21 ROMO1 TIMM17B TIMM8A AP1M2 RPS4Y1 TOMM40 RPL36 RPL27 RPS15A RPL35 RPS6 RPLP1 RPS24 RPS11 RPL13A RPL32 RPS3A RPS3 RPL8 RPL29 RPL9 RPS14 RPL27A RPL13 RPSA RPS21 RPL38 RPL4 PARL RPLP2 CIB1 MYO1C RPL12 RPS29 UBA52
3.84189e-19	50	421	5.1766	Establishment of protein localization to membrane	http://amigo.geneontology.org/amigo/term/GO:0090150	RPS20 RPL18 RPS5 RPLP0 TIMM13 RPL3 E2F1 ABCD1 RPS19 RPL18A RPL28 RPS12 RPL24 RPS15 SIL1 RPL21 OPTN ROMO1 TIMM8A RPS4Y1 RPL36 RPL27 RPS15A RPL35 RPS6 RPLP1 RPS24 RPS11 RPL13A RPL32 RPS3A RPS3 RPL8 RPL29 RPL9 RPS14 RPL27A RPL13 RPSA RPS21 RPL38 RPL4 SFN RPLP2 CIB1 MYO1C RPL12 RPS29 UBA52 CD24
7.69384e-19	54	501	4.698	RNA catabolic process	http://amigo.geneontology.org/amigo/term/GO:0006401	RPS20 RPL18 IGF2BP2 RPS5 RPLP0 RPL3 E2F1 RPS19 RPL18A HSPB1 RPL28 RPS12 RPL24 RPS15 RPL21 TRAF2 SEM1 RPS4Y1 RPL36 LSM4 RPL27 RPS15A IGF2BP3 PSMB7 RPL35 RPS6 RPLP1 RPS24 PSMB6 RPS11 RPL13A RPL32 RPS3A RPS3 RPL8 RPL29 RPL9 RPS14 PSMC3 RPL27A RPL13 RPSA RPS21 ISG20 RPL38 PSMD1 RPL4 RPLP2 PKP3 PSMD13 RPL12 RPS29 UBA52 IKBKE
1.68142e-18	64	710	3.92897	Aromatic compound catabolic process	http://amigo.geneontology.org/amigo/term/GO:0019439	RPS20 RPL18 NTHL1 IGF2BP2 RPS5 RPLP0 BLVRB ACOT7 RPL3 GSTZ1 E2F1 ABCD1 FAH RPS19 RPL18A HSPB1 RPL28 RPS12 RPL24 RPS15 RPL21 NT5C TRAF2 SEM1 RPS4Y1 RPL36 LSM4 RPL27 RPS15A NT5E IGF2BP3 PSMB7 RPL35 RPS6 RPLP1 RPS24 CYP1A1 NUDT7 PSMB6 RPS11 RPL13A RPL32 RPS3A RPS3 RPL8 RPL29 RPL9 RPS14 PSMC3 RPL27A RPL13 RPSA RPS21 ISG20 RPL38 PSMD1 RPL4 RPLP2 PKP3 PSMD13 RPL12 RPS29 UBA52 IKBKE
5.78252e-18	60	644	4.0609	Nucleobase-containing compound catabolic process	http://amigo.geneontology.org/amigo/term/GO:0034655	RPS20 RPL18 NTHL1 IGF2BP2 RPS5 RPLP0 ACOT7 RPL3 E2F1 ABCD1 RPS19 RPL18A HSPB1 RPL28 RPS12 RPL24 RPS15 RPL21 NT5C TRAF2 SEM1 RPS4Y1 RPL36 LSM4 RPL27 RPS15A NT5E IGF2BP3 PSMB7 RPL35 RPS6 RPLP1 RPS24 NUDT7 PSMB6 RPS11 RPL13A RPL32 RPS3A RPS3 RPL8 RPL29 RPL9 RPS14 PSMC3 RPL27A RPL13 RPSA RPS21 ISG20 RPL38 PSMD1 RPL4 RPLP2 PKP3 PSMD13 RPL12 RPS29 UBA52 IKBKE
8.21581e-18	62	691	3.91084	Heterocycle catabolic process	http://amigo.geneontology.org/amigo/term/GO:0046700	RPS20 RPL18 NTHL1 IGF2BP2 RPS5 RPLP0 BLVRB ACOT7 RPL3 E2F1 ABCD1 RPS19 RPL18A HSPB1 RPL28 RPS12 RPL24 RPS15 RPL21 NT5C TRAF2 SEM1 RPS4Y1 RPL36 LSM4 RPL27 RPS15A NT5E IGF2BP3 PSMB7 RPL35 RPS6 RPLP1 RPS24 CYP1A1 NUDT7 PSMB6 RPS11 RPL13A RPL32 RPS3A RPS3 RPL8 RPL29 RPL9 RPS14 PSMC3 RPL27A RPL13 RPSA RPS21 ISG20 RPL38 PSMD1 RPL4 RPLP2 PKP3 PSMD13 RPL12 RPS29 UBA52 IKBKE
1.14787e-17	64	739	3.77479	Organic cyclic compound catabolic process	http://amigo.geneontology.org/amigo/term/GO:1901361	RPS20 RPL18 NTHL1 IGF2BP2 RPS5 RPLP0 BLVRB ACOT7 RPL3 GSTZ1 E2F1 ABCD1 FAH RPS19 RPL18A HSPB1 RPL28 RPS12 RPL24 RPS15 RPL21 NT5C TRAF2 SEM1 RPS4Y1 RPL36 LSM4 RPL27 RPS15A NT5E IGF2BP3 PSMB7 RPL35 RPS6 RPLP1 RPS24 CYP1A1 NUDT7 PSMB6 RPS11 RPL13A RPL32 RPS3A RPS3 RPL8 RPL29 RPL9 RPS14 PSMC3 RPL27A RPL13 RPSA RPS21 ISG20 RPL38 PSMD1 RPL4 RPLP2 PKP3 PSMD13 RPL12 RPS29 UBA52 IKBKE
1.23738e-17	62	698	3.87162	Cellular nitrogen compound catabolic process	http://amigo.geneontology.org/amigo/term/GO:0044270	RPS20 RPL18 NTHL1 IGF2BP2 RPS5 RPLP0 BLVRB ACOT7 RPL3 E2F1 ABCD1 RPS19 RPL18A HSPB1 RPL28 RPS12 RPL24 RPS15 RPL21 NT5C TRAF2 SEM1 TST RPS4Y1 RPL36 LSM4 RPL27 RPS15A NT5E IGF2BP3 PSMB7 RPL35 RPS6 RPLP1 RPS24 NUDT7 PSMB6 RPS11 RPL13A RPL32 RPS3A RPS3 RPL8 RPL29 RPL9 RPS14 PSMC3 RPL27A RPL13 RPSA RPS21 ISG20 RPL38 PSMD1 RPL4 RPLP2 PKP3 PSMD13 RPL12 RPS29 UBA52 IKBKE
7.31961e-16	53	566	4.08147	Establishment of protein localization to organelle	http://amigo.geneontology.org/amigo/term/GO:0072594	RPS20 RPL18 RPS5 RPLP0 TIMM13 TSPO RPL3 E2F1 ABCD1 RPS19 RPL18A RPL28 RPS12 RPL24 RPS15 RPL21 ROMO1 TIMM17B TIMM8A RPS4Y1 TOMM40 RPL36 RPL27 RPS15A RPL35 RPS6 RPLP1 RPS24 NABP2 WRAP53 RPS11 RPL13A RPL32 RPS3A RPS3 LMNA RPL8 RPL29 RPL9 RPS14 RPL27A RPL13 RPSA CDK1 RPS21 RPL38 RPL4 PARL SFN RPLP2 RPL12 RPS29 UBA52
9.3161e-16	64	808	3.45244	Translation	http://amigo.geneontology.org/amigo/term/GO:0006412	RPS20 RPL18 TCOF1 IGF2BP2 MRPS34 RPS5 MRPL28 RPLP0 RPL3 RPS19 RPL18A HSPB1 RPL28 RPS12 RPL24 RPS15 FARSB MRPL37 MRPS15 RPL21 MRPS2 KRT17 RPS4Y1 RPL36 LSM4 RPL27 RPS15A IGF2BP3 TACO1 RPL35 RPS6 RPLP1 RPS24 GRB7 RPS11 RPL13A RPL32 RPS3A RPS3 MRPL17 RPL8 RPL29 RPL22L1 RPL9 RPL39L APEH RPS14 RPL36AL RPL27A RPL13 RPSA RPS21 RPL38 RPL4 MRPL11 RPLP2 PER1 MRPL14 PKP3 MRPL21 RPL12 RPS29 UBA52 MRPL12
1.45977e-15	65	839	3.37682	Peptide biosynthetic process	http://amigo.geneontology.org/amigo/term/GO:0043043	RPS20 RPL18 TCOF1 IGF2BP2 MRPS34 RPS5 MRPL28 RPLP0 RPL3 GSS RPS19 RPL18A HSPB1 RPL28 RPS12 RPL24 RPS15 FARSB MRPL37 MRPS15 RPL21 MRPS2 KRT17 RPS4Y1 RPL36 LSM4 RPL27 RPS15A IGF2BP3 TACO1 RPL35 RPS6 RPLP1 RPS24 GRB7 RPS11 RPL13A RPL32 RPS3A RPS3 MRPL17 RPL8 RPL29 RPL22L1 RPL9 RPL39L APEH RPS14 RPL36AL RPL27A RPL13 RPSA RPS21 RPL38 RPL4 MRPL11 RPLP2 PER1 MRPL14 PKP3 MRPL21 RPL12 RPS29 UBA52 MRPL12
1.01827e-14	71	1018	3.03996	Peptide metabolic process	http://amigo.geneontology.org/amigo/term/GO:0006518	RPS20 RPL18 TCOF1 IGF2BP2 MRPS34 RPS5 GSTP1 MRPL28 RPLP0 RPL3 GSTZ1 GSS LHB RPS19 RPL18A HSPB1 RPL28 RPS12 RPL24 RPS15 FARSB MRPL37 MRPS15 RPL21 MRPS2 KRT17 RPS4Y1 RPL36 LSM4 RPL27 RPS15A IGF2BP3 TACO1 RPL35 RPS6 RPLP1 RPS24 GRB7 RPS11 RPL13A RPL32 RPS3A PTGES2 GSTO1 RPS3 MRPL17 RPL8 RPL29 RPL22L1 RPL9 RPL39L APEH RPS14 RPL36AL RPL27A RPL13 RPSA RPS21 THOP1 RPL38 RPL4 MRPL11 RPLP2 PER1 MRPL14 PKP…
5.34432e-14	36	295	5.31909	RRNA processing	http://amigo.geneontology.org/amigo/term/GO:0006364	TFB1M RPL18 RPLP0 RPL3 RPS19 RPL18A RPL28 RPL24 RPS15 RPL21 EMG1 RPL36 RPL27 RPL35 RPS6 RPLP1 RPS24 RPL13A RPL32 FAM207A RPL8 RPL29 RPL9 RPS14 RPL27A RPL13 RPS21 ISG20 RPL38 RPL4 RPLP2 TBL3 RRP7A RPL12 UBA52 PWP2
6.15339e-14	104	1961	2.3116	Organonitrogen compound biosynthetic process	http://amigo.geneontology.org/amigo/term/GO:1901566	RPS20 XYLT2 CPS1 RFC2 RPL18 ST6GALNAC2 TCOF1 IGF2BP2 MRPS34 RPS5 GSTP1 MRPL28 RPLP0 PHGDH ACOT7 ATP5F1D TSPO RPL3 GSTZ1 GSS PIGU OAZ1 RPS19 RPL18A HSPB1 RPL28 RPS12 RPL24 RPS15 SDC1 FARSB MRPL37 MRPS15 B4GALT2 GALNT12 MTHFD1L RPL21 MRPS2 HS3ST2 ATP5F1E KRT17 RPS4Y1 RPL36 LSM4 RPL27 ALDH3B2 RPS15A NT5E IGF2BP3 TACO1 FPGS RPL35 RPS6 RPLP1 RPS24 ATIC MMAB GRB7 RPS11 RPL13A RPL32 RPS3A GSTO1 RPS3 MRP…
1.53197e-13	81	1337	2.64065	Cellular amide metabolic process	http://amigo.geneontology.org/amigo/term/GO:0043603	RPS20 CPS1 RPL18 TCOF1 IGF2BP2 MRPS34 RPS5 GSTP1 MRPL28 RPLP0 ACOT7 RPL3 GSTZ1 GSS ABCD1 LHB RPS19 RPL18A HSPB1 RPL28 RPS12 RPL24 RPS15 FARSB MRPL37 MRPS15 MTHFD1L RPL21 MRPS2 KRT17 RPS4Y1 RPL36 LSM4 RPL27 RPS15A IGF2BP3 TACO1 FPGS RPL35 RPS6 RPLP1 RPS24 NUDT7 GRB7 RPS11 RPL13A ABCA12 RPL32 RPS3A PTGES2 GSTO1 RPS3 MRPL17 RPL8 RPL29 RPL22L1 RPL9 RPL39L APEH RPS14 RPL36AL RPL27A MVD RPL13 RPSA RPS2…
1.70953e-13	36	307	5.11118	RRNA metabolic process	http://amigo.geneontology.org/amigo/term/GO:0016072	TFB1M RPL18 RPLP0 RPL3 RPS19 RPL18A RPL28 RPL24 RPS15 RPL21 EMG1 RPL36 RPL27 RPL35 RPS6 RPLP1 RPS24 RPL13A RPL32 FAM207A RPL8 RPL29 RPL9 RPS14 RPL27A RPL13 RPS21 ISG20 RPL38 RPL4 RPLP2 TBL3 RRP7A RPL12 UBA52 PWP2
2.00389e-13	68	1006	2.94624	Amide biosynthetic process	http://amigo.geneontology.org/amigo/term/GO:0043604	RPS20 CPS1 RPL18 TCOF1 IGF2BP2 MRPS34 RPS5 MRPL28 RPLP0 RPL3 GSTZ1 GSS RPS19 RPL18A HSPB1 RPL28 RPS12 RPL24 RPS15 FARSB MRPL37 MRPS15 RPL21 MRPS2 KRT17 RPS4Y1 RPL36 LSM4 RPL27 RPS15A IGF2BP3 TACO1 RPL35 RPS6 RPLP1 RPS24 GRB7 RPS11 RPL13A RPL32 RPS3A RPS3 MRPL17 RPL8 RPL29 RPL22L1 RPL9 RPL39L APEH RPS14 RPL36AL RPL27A RPL13 RPSA RPS21 RPL38 RPL4 MRPL11 SPHK1 RPLP2 PER1 MRPL14 PKP3 MRPL21 RPL12 RPS…
2.77178e-13	39	367	4.63186	Ribosome biogenesis	http://amigo.geneontology.org/amigo/term/GO:0042254	TFB1M RPL18 RPS5 RPLP0 RPL3 RPS19 RPL18A RPL28 RPL24 RPS15 RPL21 MRPS2 EMG1 RPL36 RPL27 RPL35 RPS6 RPLP1 RPS24 RPL13A RPL32 FAM207A RPL8 RPL29 RPL9 RPS14 RPL27A RPL13 RPSA RPS21 ISG20 RPL38 RPL4 RPLP2 TBL3 RRP7A RPL12 UBA52 PWP2
3.22797e-13	57	750	3.31261	Protein localization to membrane	http://amigo.geneontology.org/amigo/term/GO:0072657	RPS20 EHD2 RPL18 SLC9A3R2 RPS5 RPLP0 EZR TIMM13 RPL3 ZMYND8 E2F1 ABCD1 RPS19 RPL18A RPL28 RPS12 RPL24 RPS15 VAMP8 SIL1 RPL21 OPTN ROMO1 TIMM8A RPS4Y1 RPL36 RPL27 RPS15A RPL35 RPS6 RPLP1 RPS24 RPS11 RPL13A ABCA12 RPL32 RPS3A RPS3 RPL8 RPL29 RPL9 RPS14 RPL27A RPL13 RPSA RPS21 RPL38 RPL4 SFN RPLP2 PKP3 CIB1 MYO1C RPL12 RPS29 UBA52 CD24
9.18971e-12	58	836	3.02398	Localization within membrane	http://amigo.geneontology.org/amigo/term/GO:0051668	RPS20 EHD2 RPL18 SLC9A3R2 RPS5 RPLP0 EZR TIMM13 RPL3 ZMYND8 E2F1 ABCD1 RPS19 RPL18A RPL28 RPS12 RPL24 RPS15 VAMP8 SIL1 RPL21 OPTN RAB17 ROMO1 TIMM8A RPS4Y1 RPL36 RPL27 RPS15A RPL35 RPS6 RPLP1 RPS24 RPS11 RPL13A ABCA12 RPL32 RPS3A RPS3 RPL8 RPL29 RPL9 RPS14 RPL27A RPL13 RPSA RPS21 RPL38 RPL4 SFN RPLP2 PKP3 CIB1 MYO1C RPL12 RPS29 UBA52 CD24
9.60875e-12	67	1066	2.73952	Intracellular protein transport	http://amigo.geneontology.org/amigo/term/GO:0006886	RPS20 AP2S1 RPL18 STXBP2 RPS5 RPLP0 TIMM13 TSPO RPL3 RANGAP1 E2F1 ABCD1 OAZ1 RPS19 RPL18A HSPB1 RPL28 EXPH5 RPS12 RPL24 RPS15 MLPH SIL1 RPL21 RAB17 ROMO1 TIMM17B TIMM8A AP1M2 RPS4Y1 TOMM40 RPL36 RPL27 RPS15A RPL35 RPS6 RPLP1 RPS24 RPS11 RPL13A SYTL1 ABCA12 RPL32 RPS3A RPS3 LMNA RPL8 RPL29 RPL9 RPS14 RPL27A RPL13 RPSA CDK1 RPS21 RPL38 RPL4 PARL CLTB SFN RPLP2 CIB1 MYO1C RPL12 RPS29 UBA52 CD24
9.26323e-11	64	1040	2.68228	Protein localization to organelle	http://amigo.geneontology.org/amigo/term/GO:0033365	RPS20 CNTLN RPL18 RPS5 RPLP0 EZR TIMM13 TSPO RPL3 RANGAP1 E2F1 ABCD1 RPS19 RPL18A RPL28 RPS12 RPL24 RPS15 RPL21 OPTN ROMO1 TIMM17B TIMM8A RPS4Y1 TOMM40 RPL36 RPL27 RPS15A RPL35 RPS6 KNL1 RPLP1 RPS24 NABP2 WRAP53 RPS11 RPL13A RPL32 RPS3A CDCA5 RPS3 LMNA RPL8 RPL29 RPL9 RPS14 RPL27A CDT1 RPL13 RPSA CDK1 RPS21 RPL38 RPL4 PARL SFN RPLP2 HASPIN AURKB TMEM107 RPL12 ARL2 RPS29 UBA52
4.08572e-10	67	1158	2.52187	Viral process	http://amigo.geneontology.org/amigo/term/GO:0016032	IL32 RPS20 AP2S1 RPL18 NUCKS1 ST6GALNAC2 PVR RPS5 RPLP0 LGALS1 RPL3 E2F1 RPS19 RPL18A FKBP8 CAV2 HSPB1 RPL28 RPS12 RPL24 RPS15 VAMP8 RPL21 OPTN AP1M2 RPS4Y1 RPL36 BST2 RPL27 RPS15A KRT7 PSMB7 RPL35 RPS6 TMPRSS4 RPLP1 RPS24 WRAP53 MVB12A PSMB6 RPS11 RPL13A SLC20A1 RPL32 RPS3A RPS3 RPL8 RPL29 RPL9 RPS14 PSMC3 RPL27A RPL13 RPSA CDK1 RPS21 PPIH ISG20 RPL38 RPL4 RPLP2 IFITM1 ISG15 RPL12 RPS29 UBA52 IK…
2.27133e-09	41	535	3.34031	Ribonucleoprotein complex biogenesis	http://amigo.geneontology.org/amigo/term/GO:0022613	TFB1M RPL18 RPS5 RPLP0 RPL3 RPS19 RPL18A RPL28 RPL24 RPS15 RPL21 MRPS2 SNRPD2 EMG1 RPL36 LSM4 RPL27 RPL35 RPS6 RPLP1 RPS24 RPL13A RPL32 FAM207A RPL8 RPL29 RPL9 RPS14 RPL27A RPL13 RPSA RPS21 ISG20 RPL38 RPL4 RPLP2 TBL3 RRP7A RPL12 UBA52 PWP2
4.58091e-09	72	1368	2.29405	Cellular macromolecule catabolic process	http://amigo.geneontology.org/amigo/term/GO:0044265	RPS20 AP2S1 RPL18 RNF126 IGF2BP2 RPS5 RPLP0 EZR RPL3 TRIB3 E2F1 RPS19 RPL18A HSPB1 UBE2S RPL28 RPS12 RPL24 RPS15 FBXO2 CDC20 RPL21 TRAF2 SEM1 RPS4Y1 RPL36 LSM4 RPL27 RPS15A IGF2BP3 PSMB7 RPL35 RPS6 RPLP1 RPS24 MVB12A CBLC PSMB6 RPS11 RPL13A DTL RPL32 RPS3A RPS3 FBXL18 UBE2Z RPL8 RPL29 RPL9 RPS14 PTTG1 PSMC3 RPL27A RPL13 RPSA PBK CDK1 USP32 RPS21 ISG20 RPL38 PSMD1 RPL4 RPLP2 AURKB PKP3 PSMD13 ISG1…
8.62371e-09	38	490	3.38022	NcRNA processing	http://amigo.geneontology.org/amigo/term/GO:0034470	TFB1M RPL18 HSD17B10 RPLP0 RPL3 RPS19 RPL18A RPL28 RPL24 RPS15 RPL21 EMG1 RPL36 RPL27 RPL35 RPS6 RPLP1 RPS24 RPL13A RPL32 FAM207A RPL8 RPL29 RPL9 RPS14 RPL27A RPL13 PUSL1 RPS21 ISG20 RPL38 RPL4 RPLP2 TBL3 RRP7A RPL12 UBA52 PWP2
1.1933e-08	32	364	3.83182	DNA replication	http://amigo.geneontology.org/amigo/term/GO:0006260	POLA2 RFC2 POLQ NUCKS1 CDC45 RPA3 GLI1 CHTF18 SEM1 GINS2 BRIP1 PSMB7 ZGRF1 PSMB6 DTL CHAF1B PTMS RECQL4 STOML2 PSMC3 PCLAF CDT1 CHAF1A CDK1 RRM2 PSMD1 RMI2 TRAIP PSMD13 BLM BAZ1A UBA52
1.68181e-08	79	1620	2.12554	Macromolecule catabolic process	http://amigo.geneontology.org/amigo/term/GO:0009057	RPS20 LYPLA2 AP2S1 RPL18 RNF126 IGF2BP2 RPS5 RPLP0 EZR RPL3 TRIB3 E2F1 OAZ1 RPS19 RPL18A HSPB1 UBE2S RPL28 RPS12 RPL24 RPS15 SDC1 FBXO2 MAD2L2 CDC20 RPL21 TRAF2 SEM1 RPS4Y1 RPL36 LSM4 RPL27 RPS15A IGF2BP3 PSMB7 RPL35 RPS6 RPLP1 RPS24 MVB12A CBLC PSMB6 RPS11 RPL13A DTL RPL32 RPS3A RPS3 FBXL18 UBE2Z RPL8 RPL29 RPL9 RPS14 PTTG1 SOX17 PACSIN3 PSMC3 RPL27A RPL13 RPSA PBK CDK1 USP32 RPS21 ISG20 RPL38 C…
2.27797e-08	58	1020	2.47848	MRNA metabolic process	http://amigo.geneontology.org/amigo/term/GO:0016071	RPS20 RPL18 IGF2BP2 SNRPA RPS5 RPLP0 RPL3 E2F1 RPS19 RPL18A HSPB1 RPL28 RPS12 RPL24 RPS15 CPSF3 RPL21 SNRPD2 TRAF2 SEM1 RPS4Y1 RPL36 LSM4 RPL27 CTNNBL1 RPS15A IGF2BP3 PSMB7 RPL35 RPS6 RPLP1 RPS24 PSMB6 RPS11 RPL13A RPL32 RPS3A RPS3 RPL8 RPL29 RPL9 RPS14 PSMC3 RPL27A RPL13 RPSA RPS21 PPIH RPL38 PSMD1 RPL4 RPLP2 PKP3 PSMD13 RPL12 RPS29 UBA52 IKBKE
3.56269e-08	74	1496	2.15604	Cell cycle process	http://amigo.geneontology.org/amigo/term/GO:0022402	ERCC1 TACC3 POLA2 CNTLN RFC2 ASPM WDR62 SMC1B KIF22 TPX2 BIRC5 PHGDH EZR CDC45 MISP CENPM DMC1 RANGAP1 MYBL2 KIF3B E2F1 PIM2 CAV2 RPA3 UBE2S GLI1 RPL24 MAD2L2 CDC20 PTPA MND1 CIT OPTN CHTF18 TUBA4A SEM1 TUBGCP2 CCNJL BRIP1 PSMB7 RPS6 KNL1 CEP55 NABP2 CYP1A1 P3H4 PSMB6 KIF2C DTL CTDSPL CDCA5 MKI67 RPS3 CCNB2 LMNA SPC24 PTTG1 PSMC3 CENPV PCLAF CDT1 CDK1 RRM2 PSMD1 RMI2 SFN SPHK1 HASPIN AURKB RAD51B…
4.34652e-08	68	1325	2.23692	Negative regulation of gene expression	http://amigo.geneontology.org/amigo/term/GO:0010629	RPS20 RPL18 IGF2BP2 RPS5 GSTP1 RPLP0 EZR TSPO RPL3 E2F1 ABCD1 RPS19 RPL18A HSPB1 RPL28 RPS12 RPL24 RPS15 RPL21 MAP2K2 TRAF2 SEM1 RPS4Y1 RPL36 BST2 LSM4 RPL27 SFTPD RPS15A IGF2BP3 BRIP1 PSMB7 RPL35 RPS6 RPLP1 RPS24 GRB7 PSMB6 RPS11 RPL13A RPL32 RPS3A RPS3 RPL8 RPL29 RPL9 RPS14 PSMC3 RPL27A CENPV RPL13 RPSA CDK1 RPS21 RPL38 PSMD1 RPL4 RPLP2 TRAIP PKP3 PSMD13 ISG15 RPL12 RPS29 UBA52 NME1 IKBKE CD24
6.34608e-08	85	1857	1.9951	Intracellular transport	http://amigo.geneontology.org/amigo/term/GO:0046907	RPS20 EHD2 AP2S1 RPL18 RNF126 STXBP2 RPS5 RPLP0 EZR ATP5F1D TIMM13 TSPO RPL3 RANGAP1 KIF3B E2F1 ABCD1 KLC3 OAZ1 RPS19 RPL18A HSPB1 RPL28 EXPH5 RPS12 COL7A1 RPL24 REEP6 RPS15 MLPH CPSF3 SIL1 RPL21 ATP5F1E RAB17 SNRPD2 DYNLRB1 ROMO1 TIMM17B MAP2K2 TIMM8A SEM1 AP1M2 RPS4Y1 TOMM40 RPL36 RPL27 RPS15A RPL35 RPS6 RPLP1 RPS24 MVB12A RPS11 RPL13A SYTL1 ABCA12 RPL32 RPS3A RPS3 LMNA RPL8 BICDL2 RPL29 RPL9 R…
1.69281e-07	87	1960	1.93473	Cellular protein localization	http://amigo.geneontology.org/amigo/term/GO:0034613	RPS20 EHD2 TMSB10 AP2S1 CNTLN RPL18 SLC9A3R2 STXBP2 RPS5 RPLP0 EZR TIMM13 MISP TSPO RPL3 RANGAP1 ZMYND8 E2F1 PIGU ABCD1 OAZ1 RPS19 RPL18A HSPB1 RPL28 EXPH5 RPS12 RPL24 RPS15 MLPH VAMP8 SIL1 RPL21 OPTN RAB17 ROMO1 TIMM17B TIMM8A AP1M2 RPS4Y1 TOMM40 RPL36 RPL27 RPS15A RPL35 RPS6 KNL1 RPLP1 RPS24 NABP2 WRAP53 RPS11 RPL13A SYTL1 ABCA12 RPL32 RPS3A CDCA5 RPS3 LMNA RPL8 RPL29 RPL9 RPS14 RPL27A CDT1 RPL…
1.73586e-07	61	1166	2.28028	Mitotic cell cycle	http://amigo.geneontology.org/amigo/term/GO:0000278	TACC3 WDR62 SMC1B KIF22 TPX2 BIRC5 CDC45 MISP CENPM RANGAP1 MYBL2 KIF3B E2F1 PIM2 CAV2 RPA3 UBE2S RPL24 MAD2L2 CDC20 PTPA CIT OPTN TUBA4A SEM1 TUBGCP2 CCNJL PSMB7 RPS6 KNL1 CEP55 NABP2 CYP1A1 PSMB6 KIF2C DTL CTDSPL CDCA5 MKI67 CCNB2 LMNA SPC24 PTTG1 SKA3 PSMC3 CDT1 PBK CDK1 RRM2 CKS1B PSMD1 SFN SPHK1 HASPIN AURKB RAD51B CIB1 PSMD13 BLM CENPW UBA52
2.28739e-07	87	1974	1.92101	Cellular macromolecule localization	http://amigo.geneontology.org/amigo/term/GO:0070727	RPS20 EHD2 TMSB10 AP2S1 CNTLN RPL18 SLC9A3R2 STXBP2 RPS5 RPLP0 EZR TIMM13 MISP TSPO RPL3 RANGAP1 ZMYND8 E2F1 PIGU ABCD1 OAZ1 RPS19 RPL18A HSPB1 RPL28 EXPH5 RPS12 RPL24 RPS15 MLPH VAMP8 SIL1 RPL21 OPTN RAB17 ROMO1 TIMM17B TIMM8A AP1M2 RPS4Y1 TOMM40 RPL36 RPL27 RPS15A RPL35 RPS6 KNL1 RPLP1 RPS24 NABP2 WRAP53 RPS11 RPL13A SYTL1 ABCA12 RPL32 RPS3A CDCA5 RPS3 LMNA RPL8 RPL29 RPL9 RPS14 RPL27A CDT1 RPL…
4.3173e-07	8	19	18.3524	Ribosomal small subunit assembly	http://amigo.geneontology.org/amigo/term/GO:0000028	RPS5 RPS19 RPS15 RPS14 RPSA RPL38 RRP7A PWP2
6.59661e-07	14	84	7.2645	Ribosomal small subunit biogenesis	http://amigo.geneontology.org/amigo/term/GO:0042274	RPS5 RPS19 RPS15 EMG1 RPS6 RPS24 FAM207A RPS14 RPSA RPS21 RPL38 TBL3 RRP7A PWP2
7.04878e-07	39	604	2.81439	NcRNA metabolic process	http://amigo.geneontology.org/amigo/term/GO:0034660	TFB1M RPL18 HSD17B10 RPLP0 RPL3 RPS19 RPL18A RPL28 RPL24 RPS15 FARSB RPL21 EMG1 RPL36 RPL27 RPL35 RPS6 RPLP1 RPS24 RPL13A RPL32 FAM207A RPL8 RPL29 RPL9 RPS14 RPL27A RPL13 PUSL1 RPS21 ISG20 RPL38 RPL4 RPLP2 TBL3 RRP7A RPL12 UBA52 PWP2
7.89021e-07	86	1997	1.87706	Cell cycle	http://amigo.geneontology.org/amigo/term/GO:0007049	ERCC1 TACC3 POLA2 CNTLN RFC2 ASPM PRR11 WDR62 SMC1B KIF22 TPX2 BIRC5 PHGDH EZR CDC45 MISP CENPM DMC1 RANGAP1 MYBL2 KIF3B E2F1 PIM2 CAV2 RPA3 UBE2S GLI1 CDCA3 RPL24 MAD2L2 CDC20 PTPA MND1 CIT OPTN CHTF18 TUBA4A SEM1 TUBGCP2 RPS15A CCNJL BRIP1 PSMB7 RPS6 KNL1 CEP55 NABP2 CYP1A1 FANCI P3H4 PSMB6 KIF2C DTL CTDSPL CDCA5 MKI67 RPS3 CCNB2 CHAF1B LMNA SPC24 PTTG1 SKA3 PSMC3 CENPV PCLAF CDT1 CHAF1A PBK CD…
9.93479e-07	54	1021	2.30529	Mitotic cell cycle process	http://amigo.geneontology.org/amigo/term/GO:1903047	TACC3 WDR62 SMC1B KIF22 TPX2 BIRC5 CDC45 MISP CENPM RANGAP1 MYBL2 KIF3B E2F1 PIM2 CAV2 UBE2S RPL24 MAD2L2 CDC20 PTPA CIT OPTN TUBA4A SEM1 CCNJL PSMB7 RPS6 KNL1 CEP55 NABP2 CYP1A1 PSMB6 KIF2C DTL CTDSPL CDCA5 MKI67 CCNB2 LMNA SPC24 PTTG1 PSMC3 CDT1 CDK1 RRM2 PSMD1 SFN SPHK1 HASPIN AURKB RAD51B PSMD13 BLM UBA52
1.85344e-06	12	64	8.17256	Ribosome assembly	http://amigo.geneontology.org/amigo/term/GO:0042255	RPS5 RPLP0 RPL3 RPS19 RPL24 RPS15 MRPS2 RPS14 RPSA RPL38 RRP7A PWP2
2.46066e-06	22	235	4.08048	DNA-dependent DNA replication	http://amigo.geneontology.org/amigo/term/GO:0006261	POLA2 RFC2 POLQ NUCKS1 CDC45 RPA3 CHTF18 SEM1 GINS2 PSMB7 ZGRF1 PSMB6 RECQL4 STOML2 PSMC3 CDT1 PSMD1 TRAIP PSMD13 BLM BAZ1A UBA52
1.14082e-05	28	392	3.11336	Non-membrane-bounded organelle assembly	http://amigo.geneontology.org/amigo/term/GO:0140694	ASPM WDR62 RPS5 TPX2 RPLP0 EZR MISP RPL3 MYBL2 KIF3B TNNT1 RPS19 RPL24 RPS15 CDC20 MRPS2 LSM4 TUBGCP2 GRB7 RPS3 CCNB2 RPS14 RPSA RPL38 AURKB RRP7A CENPW PWP2
2.43187e-05	37	639	2.52382	DNA repair	http://amigo.geneontology.org/amigo/term/GO:0006281	ERCC1 RFC2 POLQ NTHL1 NUCKS1 KIF22 CDC45 DMC1 RPA3 MAD2L2 SEM1 GINS2 DDB2 BRIP1 NABP2 FANCI WRAP53 DTL CDCA5 RPS3 CHAF1B RECQL4 PTTG1 ALKBH3 PCLAF CHAF1A CDK1 MGMT RMI2 SWI5 RAD51B TRAIP CIB1 PARPBP ISG15 BLM UBA52
3.97238e-05	51	1056	2.10505	DNA metabolic process	http://amigo.geneontology.org/amigo/term/GO:0006259	ERCC1 POLA2 RFC2 POLQ NTHL1 PRKCQ NUCKS1 KIF22 CDC45 DMC1 RPA3 MAD2L2 MND1 CHTF18 SEM1 GINS2 DDB2 NT5E BRIP1 ZGRF1 NABP2 CYP1A1 FANCI WRAP53 DTL CDCA5 RPS3 CHAF1B LMNA RECQL4 PTTG1 ALKBH3 PCLAF CDT1 CHAF1A TK1 CDK1 MGMT ISG20 RMI2 SWI5 SPHK1 AURKB RAD51B TRAIP CIB1 PARPBP ISG15 BLM UBA52 NME1
5.49109e-05	76	1867	1.7743	Protein transport	http://amigo.geneontology.org/amigo/term/GO:0015031	RPS20 AP2S1 RPL18 STXBP2 RPS5 RPLP0 BIRC5 EZR TIMM13 TSPO RPL3 RANGAP1 E2F1 MYOM1 ABCD1 OAZ1 RPS19 RPL18A HSPB1 RPL28 NMU EXPH5 RPS12 RPL24 RPS15 MLPH VAMP8 SIL1 RPL21 OPTN RAB17 ROMO1 TIMM17B TIMM8A AP1M2 RPS4Y1 TOMM40 RPL36 RPL27 RPS15A RPL35 RPS6 RPLP1 RPS24 HADH MVB12A RPS11 RPL13A SYTL1 ABCA12 RPL32 RPS3A RPS3 LMNA RPL8 RPL29 RPL9 RPS14 RPL27A RPL13 RPSA CDK1 RPS21 RPL38 SNCG RPL4 PARL CLTB …
6.32277e-05	32	531	2.62671	Nuclear division	http://amigo.geneontology.org/amigo/term/GO:0000280	TACC3 ASPM SMC1B KIF22 TPX2 MISP DMC1 RANGAP1 MYBL2 KIF3B CAV2 UBE2S RPL24 MAD2L2 CDC20 MND1 BRIP1 P3H4 KIF2C CDCA5 MKI67 CCNB2 LMNA PTTG1 CDT1 CDK1 SPHK1 HASPIN AURKB RAD51B PSMD13 UBA52
8.126e-05	79	1989	1.73121	Establishment of protein localization	http://amigo.geneontology.org/amigo/term/GO:0045184	RPS20 AP2S1 RPL18 STXBP2 RPS5 RPLP0 BIRC5 EZR TIMM13 TSPO RPL3 RANGAP1 E2F1 MYOM1 ABCD1 OAZ1 RPS19 RPL18A HSPB1 RPL28 NMU EXPH5 RPS12 RPL24 RPS15 MLPH VAMP8 SIL1 RPL21 OPTN RAB17 ROMO1 TIMM17B TIMM8A AP1M2 RPS4Y1 TOMM40 RPL36 RPL27 RPS15A RPL35 RPS6 RPLP1 CEP55 RPS24 HADH NABP2 WRAP53 MVB12A RPS11 RPL13A SYTL1 ABCA12 RPL32 RPS3A RPS3 LMNA RPL8 RPL29 RPL9 RPS14 RPL27A RPL13 RPSA CDK1 RPS21 RPL38 S…
8.42374e-05	15	143	4.57206	Double-strand break repair via homologous recombination	http://amigo.geneontology.org/amigo/term/GO:0000724	POLQ NUCKS1 CDC45 DMC1 RPA3 MAD2L2 SEM1 GINS2 NABP2 WRAP53 RECQL4 RMI2 RAD51B PARPBP BLM
9.89781e-05	15	145	4.509	Recombinational repair	http://amigo.geneontology.org/amigo/term/GO:0000725	POLQ NUCKS1 CDC45 DMC1 RPA3 MAD2L2 SEM1 GINS2 NABP2 WRAP53 RECQL4 RMI2 RAD51B PARPBP BLM
0.000123302	25	369	2.95305	Mitotic nuclear division	http://amigo.geneontology.org/amigo/term/GO:0140014	TACC3 SMC1B KIF22 TPX2 MISP RANGAP1 MYBL2 KIF3B CAV2 UBE2S RPL24 MAD2L2 CDC20 KIF2C CDCA5 MKI67 CCNB2 LMNA PTTG1 CDT1 CDK1 SPHK1 HASPIN AURKB UBA52
0.000160746	33	584	2.46296	Organelle fission	http://amigo.geneontology.org/amigo/term/GO:0048285	TACC3 ASPM SMC1B KIF22 TPX2 MISP DMC1 RANGAP1 MYBL2 KIF3B CAV2 UBE2S RPL24 MAD2L2 CDC20 MND1 BRIP1 P3H4 KIF2C CDCA5 MKI67 CCNB2 LMNA PTTG1 CDT1 CDK1 SPHK1 HASPIN AURKB RAD51B PSMD13 INF2 UBA52
0.000384571	12	105	4.98137	Anaphase-promoting complex-dependent catabolic process	http://amigo.geneontology.org/amigo/term/GO:0031145	UBE2S CDC20 SEM1 PSMB7 PSMB6 PTTG1 PSMC3 CDK1 PSMD1 AURKB PSMD13 UBA52
0.000429042	20	274	3.18153	Spindle organization	http://amigo.geneontology.org/amigo/term/GO:0007051	TACC3 ASPM WDR62 TPX2 BIRC5 EZR MISP CENPM RANGAP1 MYBL2 KIF3B CDC20 PTPA TUBGCP2 KNL1 KIF2C RPS3 CCNB2 SPC24 AURKB
0.000458911	33	615	2.33881	Mitotic cell cycle phase transition	http://amigo.geneontology.org/amigo/term/GO:0044772	TACC3 TPX2 CDC45 E2F1 PIM2 UBE2S RPL24 MAD2L2 CDC20 OPTN TUBA4A SEM1 CCNJL PSMB7 RPS6 NABP2 CYP1A1 PSMB6 DTL CTDSPL CDCA5 CCNB2 PSMC3 CDT1 CDK1 RRM2 PSMD1 SFN AURKB RAD51B PSMD13 BLM UBA52
0.00063593	74	1935	1.66689	Protein-containing complex assembly	http://amigo.geneontology.org/amigo/term/GO:0065003	ERCC1 KCNG1 TMSB10 AP2S1 POLQ SLC9A3R2 HSD17B10 RPS5 TPX2 FKBP1A RPLP0 CDC45 ATP5F1D CENPM DMC1 BIK RPL3 RPS19 RASIP1 RPA3 UBE2S NDUFS8 COL7A1 RPL24 RPS15 FARSB VAMP8 ARHGAP40 SNRPD2 NCLN TRAF2 SEM1 FCHO1 LSM4 TUBGCP2 DDB2 TACO1 PSMB7 KNL1 PSMB6 RPL13A NDUFB9 RPS3 CDC42EP2 CHAF1B ADGRL4 RPS14 STOML2 PSMC3 NDUFB8 CENPV CDT1 DNAAF3 CHAF1A TK1 RPSA CDK1 RRM2 PPIH RPL38 PSMD1 SPTBN2 CLTB BOK PSMD13 T…
0.00115042	20	294	2.9651	Double-strand break repair	http://amigo.geneontology.org/amigo/term/GO:0006302	ERCC1 POLQ NUCKS1 CDC45 DMC1 RPA3 MAD2L2 SEM1 GINS2 BRIP1 NABP2 WRAP53 CDCA5 RECQL4 MGMT RMI2 RAD51B CIB1 PARPBP BLM
0.00115042	48	1102	1.89853	Carboxylic acid metabolic process	http://amigo.geneontology.org/amigo/term/GO:0019752	MLXIPL LYPLA2 CPS1 MSMO1 HSD17B10 GSTP1 PHGDH ACOT7 SLC16A8 MCAT PNPLA3 GSTZ1 GSS TRIB3 ABCD1 FAH OAZ1 ETFB GALK1 FARSB MTHFD1L EDN2 ECHS1 SEM1 TST FPGS PSMB7 ATIC HADH CYP1A1 NUDT7 PSMB6 THNSL2 MDH2 PTGES2 GSTO1 AKR1C2 ACOXL LIPH PSMC3 ECI1 DCXR SLC19A1 PSMD1 PSMD13 AKR1C1 UROS ACY1
0.00182052	54	1318	1.78581	Cellular protein-containing complex assembly	http://amigo.geneontology.org/amigo/term/GO:0034622	TMSB10 AP2S1 RPS5 TPX2 FKBP1A RPLP0 CDC45 ATP5F1D CENPM DMC1 RPL3 RPS19 RPA3 UBE2S NDUFS8 RPL24 RPS15 VAMP8 ARHGAP40 SNRPD2 TRAF2 SEM1 FCHO1 LSM4 TUBGCP2 DDB2 TACO1 PSMB7 KNL1 PSMB6 RPL13A NDUFB9 RPS3 CDC42EP2 CHAF1B RPS14 PSMC3 NDUFB8 CENPV CDT1 DNAAF3 CHAF1A RPSA RPL38 PSMD1 SPTBN2 CLTB PSMD13 RRP7A MYO1C CENPW ARL2 UBA52 PWP2
0.00196338	49	1159	1.84276	Organic acid metabolic process	http://amigo.geneontology.org/amigo/term/GO:0006082	MLXIPL LYPLA2 CPS1 MSMO1 HSD17B10 GSTP1 PHGDH ACOT7 SLC16A8 MCAT PNPLA3 GSTZ1 GSS TRIB3 ABCD1 FAH OAZ1 ETFB GALK1 SLC2A9 FARSB MTHFD1L EDN2 ECHS1 SEM1 TST FPGS PSMB7 ATIC HADH CYP1A1 NUDT7 PSMB6 THNSL2 MDH2 PTGES2 GSTO1 AKR1C2 ACOXL LIPH PSMC3 ECI1 DCXR SLC19A1 PSMD1 PSMD13 AKR1C1 UROS ACY1
0.00208834	35	725	2.1042	Cell cycle phase transition	http://amigo.geneontology.org/amigo/term/GO:0044770	TACC3 TPX2 CDC45 E2F1 PIM2 UBE2S GLI1 RPL24 MAD2L2 CDC20 OPTN TUBA4A SEM1 CCNJL BRIP1 PSMB7 RPS6 NABP2 CYP1A1 PSMB6 DTL CTDSPL CDCA5 CCNB2 PSMC3 CDT1 CDK1 RRM2 PSMD1 SFN AURKB RAD51B PSMD13 BLM UBA52
0.00219168	44	1005	1.90829	Cellular response to DNA damage stimulus	http://amigo.geneontology.org/amigo/term/GO:0006974	ERCC1 RFC2 POLQ NTHL1 NUCKS1 KIF22 CDC45 DMC1 E2F1 RPA3 MAD2L2 SEM1 GINS2 MACROD1 DDB2 BRIP1 NABP2 FANCI WRAP53 DTL CDCA5 RPS3 CHAF1B CHCHD6 C9orf116 RECQL4 PTTG1 ALKBH3 PCLAF CHAF1A CDK1 MGMT RMI2 SFN SWI5 BOK RAD51B TRAIP CIB1 PARPBP ISG15 BLM UBA52 IKBKE
0.00223365	24	414	2.52678	Fatty acid metabolic process	http://amigo.geneontology.org/amigo/term/GO:0006631	MLXIPL LYPLA2 MSMO1 HSD17B10 GSTP1 ACOT7 MCAT PNPLA3 GSTZ1 TRIB3 ABCD1 ETFB EDN2 ECHS1 HADH CYP1A1 NUDT7 THNSL2 PTGES2 AKR1C2 ACOXL LIPH ECI1 AKR1C1
0.00223365	48	1135	1.84333	Oxoacid metabolic process	http://amigo.geneontology.org/amigo/term/GO:0043436	MLXIPL LYPLA2 CPS1 MSMO1 HSD17B10 GSTP1 PHGDH ACOT7 SLC16A8 MCAT PNPLA3 GSTZ1 GSS TRIB3 ABCD1 FAH OAZ1 ETFB GALK1 FARSB MTHFD1L EDN2 ECHS1 SEM1 TST FPGS PSMB7 ATIC HADH CYP1A1 NUDT7 PSMB6 THNSL2 MDH2 PTGES2 GSTO1 AKR1C2 ACOXL LIPH PSMC3 ECI1 DCXR SLC19A1 PSMD1 PSMD13 AKR1C1 UROS ACY1
0.00266189	7	42	7.2645	Translesion synthesis	http://amigo.geneontology.org/amigo/term/GO:0019985	RFC2 RPA3 MAD2L2 DTL PCLAF ISG15 UBA52
0.00287039	3	4	32.6902	Fatty-acyl-CoA catabolic process	http://amigo.geneontology.org/amigo/term/GO:0036115	ACOT7 ABCD1 NUDT7
0.00287602	17	242	3.0619	Cellular protein complex disassembly	http://amigo.geneontology.org/amigo/term/GO:0043624	MRPS34 MRPL28 TPX2 SH3BP1 MRPL37 MRPS15 MRPS2 KIF2C MRPL17 APEH SPTBN2 MRPL11 MRPL14 CIB1 KIF24 MRPL21 MRPL12
0.00349965	7	44	6.9343	C21-steroid hormone metabolic process	http://amigo.geneontology.org/amigo/term/GO:0008207	DKK3 HSD17B10 TSPO LHB AKR1C2 FDXR AKR1C1
0.00379395	22	376	2.5503	Chromosome segregation	http://amigo.geneontology.org/amigo/term/GO:0007059	TACC3 SMC1B KIF22 BIRC5 DMC1 MAD2L2 CDC20 BRIP1 KNL1 P3H4 KIF2C CDCA5 MKI67 RPS3 PTTG1 SKA3 CDT1 CDK1 RMI2 HASPIN AURKB CENPW
0.00400583	11	115	4.16919	Translational termination	http://amigo.geneontology.org/amigo/term/GO:0006415	MRPS34 MRPL28 MRPL37 MRPS15 MRPS2 MRPL17 APEH MRPL11 MRPL14 MRPL21 MRPL12
0.00410685	5	20	10.8967	Protein localization to kinetochore	http://amigo.geneontology.org/amigo/term/GO:0034501	KNL1 CDT1 CDK1 HASPIN AURKB
0.00410685	5	20	10.8967	Protein localization to condensed chromosome	http://amigo.geneontology.org/amigo/term/GO:1903083	KNL1 CDT1 CDK1 HASPIN AURKB
0.00436543	10	97	4.4935	Mitochondrial translational elongation	http://amigo.geneontology.org/amigo/term/GO:0070125	MRPS34 MRPL28 MRPL37 MRPS15 MRPS2 MRPL17 MRPL11 MRPL14 MRPL21 MRPL12
0.00459357	42	980	1.86801	Organelle assembly	http://amigo.geneontology.org/amigo/term/GO:0070925	EHD2 ASPM WDR62 RPS5 TPX2 RPLP0 EZR MISP RPL3 MYBL2 KIF3B TNNT1 RPS19 B9D1 RPL24 RPS15 SDC1 CDC20 MRPS2 RAB17 DYNLRB1 TUBA4A LSM4 TUBGCP2 KNL1 GRB7 MVB12A CFAP74 RPS3 CCNB2 SHANK2 RPS14 DNAAF3 RPSA CDK1 RPL38 AURKB TMEM107 KIF24 RRP7A CENPW PWP2
0.00460282	49	1209	1.76655	Regulation of cell cycle	http://amigo.geneontology.org/amigo/term/GO:0051726	TACC3 ASPM PRR11 TPX2 BIRC5 CDC45 MYBL2 KIF3B E2F1 PIM2 CAV2 RPA3 UBE2S GLI1 MAD2L2 CDC20 CIT TUBA4A SEM1 RPS15A CCNJL BRIP1 PSMB7 NABP2 CYP1A1 PSMB6 DTL CTDSPL CDCA5 MKI67 CCNB2 PTTG1 PSMC3 CENPV PCLAF CDT1 CDK1 RRM2 CKS1B PSMD1 FOSL1 RMI2 SFN SPHK1 AURKB RAD51B PSMD13 BLM UBA52
0.00460282	10	98	4.44765	Mitochondrial translational termination	http://amigo.geneontology.org/amigo/term/GO:0070126	MRPS34 MRPL28 MRPL37 MRPS15 MRPS2 MRPL17 MRPL11 MRPL14 MRPL21 MRPL12
0.00615525	15	211	3.0986	Mitotic spindle organization	http://amigo.geneontology.org/amigo/term/GO:0007052	TACC3 WDR62 TPX2 BIRC5 MISP CENPM RANGAP1 MYBL2 KIF3B CDC20 PTPA KNL1 KIF2C SPC24 AURKB
0.00628924	31	652	2.07239	Regulation of mitotic cell cycle	http://amigo.geneontology.org/amigo/term/GO:0007346	TPX2 BIRC5 E2F1 PIM2 CAV2 RPA3 UBE2S MAD2L2 CDC20 TUBA4A SEM1 PSMB7 NABP2 CYP1A1 PSMB6 DTL CTDSPL CDCA5 MKI67 PSMC3 CDT1 CDK1 CKS1B PSMD1 SFN SPHK1 AURKB RAD51B PSMD13 BLM UBA52
0.00640133	30	623	2.09889	Small molecule biosynthetic process	http://amigo.geneontology.org/amigo/term/GO:0044283	MLXIPL CPS1 DKK3 MSMO1 HSD17B10 GSTP1 PHGDH ACOT7 MCAT TRIB3 ABCD1 LHB MTHFD1L EDN2 NT5E MMAB CYP1A1 THNSL2 MDH2 EBP PTGES2 FDXR LIPH MVD TK1 SPHK1 SLC25A10 PGP UROS APRT
0.00744201	31	659	2.05037	Cell division	http://amigo.geneontology.org/amigo/term/GO:0051301	TACC3 ASPM TPX2 BIRC5 MISP KIF3B UBE2S CDCA3 MAD2L2 CDC20 CIT BRIP1 KNL1 CEP55 KIF2C CDCA5 RPS3 CCNB2 SPC24 PTTG1 SOX17 SKA3 CENPV CDT1 CDK1 CKS1B SFN AURKB CIB1 BLM CENPW
0.0089888	7	52	5.86748	Postreplication repair	http://amigo.geneontology.org/amigo/term/GO:0006301	RFC2 RPA3 MAD2L2 DTL PCLAF ISG15 UBA52
0.00952026	9	88	4.45776	Regulation of chromosome segregation	http://amigo.geneontology.org/amigo/term/GO:0051983	TACC3 MAD2L2 CDC20 KIF2C MKI67 PTTG1 CDT1 RMI2 AURKB
0.0107523	32	705	1.97842	Microtubule cytoskeleton organization	http://amigo.geneontology.org/amigo/term/GO:0000226	TACC3 CNTLN ASPM WDR62 TPX2 BIRC5 EZR MISP CENPM RANGAP1 MYBL2 KIF3B CDC20 PTPA TTLL5 TUBA4A TUBGCP2 KNL1 CFAP74 KIF2C RPS3 CCNB2 LMNA SPC24 SKA3 PCLAF DNAAF3 CDK1 AURKB CIB1 KIF24 ARL2
0.0108456	7	54	5.65017	DNA synthesis involved in DNA repair	http://amigo.geneontology.org/amigo/term/GO:0000731	RFC2 RPA3 MAD2L2 DTL PCLAF ISG15 UBA52
0.0108456	45	1126	1.74193	RNA processing	http://amigo.geneontology.org/amigo/term/GO:0006396	TFB1M RPL18 HSD17B10 SNRPA RPLP0 RPL3 RPS19 RPL18A RPL28 RPL24 RPS15 CPSF3 RPL21 SNRPD2 EMG1 MAP2K2 RPL36 LSM4 RPL27 CTNNBL1 RPL35 RPS6 RPLP1 RPS24 RPL13A RPL32 FAM207A RPL8 RPL29 RPL9 RPS14 RPL27A RPL13 PUSL1 RPS21 PPIH ISG20 RPL38 RPL4 RPLP2 TBL3 RRP7A RPL12 UBA52 PWP2
0.0108456	3	6	21.7935	Nucleoside bisphosphate catabolic process	http://amigo.geneontology.org/amigo/term/GO:0033869	ACOT7 ABCD1 NUDT7
0.0108456	3	6	21.7935	Ribonucleoside bisphosphate catabolic process	http://amigo.geneontology.org/amigo/term/GO:0034031	ACOT7 ABCD1 NUDT7
0.0108456	3	6	21.7935	Purine nucleoside bisphosphate catabolic process	http://amigo.geneontology.org/amigo/term/GO:0034034	ACOT7 ABCD1 NUDT7
0.0117283	13	178	3.18332	Mitochondrial gene expression	http://amigo.geneontology.org/amigo/term/GO:0140053	TFB1M HSD17B10 MRPS34 MRPL28 MRPL37 MRPS15 MRPS2 TACO1 MRPL17 MRPL11 MRPL14 MRPL21 MRPL12
0.0126337	11	134	3.57804	Monocarboxylic acid catabolic process	http://amigo.geneontology.org/amigo/term/GO:0072329	HSD17B10 MCAT ABCD1 FAH ETFB ECHS1 HADH NUDT7 ACOXL ECI1 DCXR
0.0127112	5	26	8.38212	Protein localization to chromosome, centromeric region	http://amigo.geneontology.org/amigo/term/GO:0071459	KNL1 CDT1 CDK1 HASPIN AURKB
0.0128803	12	157	3.33149	Translational elongation	http://amigo.geneontology.org/amigo/term/GO:0006414	MRPS34 MRPL28 MRPL37 MRPS15 MRPS2 RPLP1 MRPL17 MRPL11 RPLP2 MRPL14 MRPL21 MRPL12
0.0140214	15	231	2.83032	Microtubule cytoskeleton organization involved in mitosis	http://amigo.geneontology.org/amigo/term/GO:1902850	TACC3 WDR62 TPX2 BIRC5 MISP CENPM RANGAP1 MYBL2 KIF3B CDC20 PTPA KNL1 KIF2C SPC24 AURKB
0.0143095	40	978	1.7827	Microtubule-based process	http://amigo.geneontology.org/amigo/term/GO:0007017	TACC3 CNTLN ASPM WDR62 KIF22 TPX2 BIRC5 EZR MISP CENPM RANGAP1 MYBL2 KIF3B KLC3 HSPB1 CDC20 PTPA TTLL5 DYNLRB1 TUBA4A TUBGCP2 KIF12 KNL1 CFAP74 KIF2C RPS3 CABYR CCNB2 LMNA SPC24 BICDL2 SKA3 PCLAF DNAAF3 CDK1 AURKB CIB1 DNAH14 KIF24 ARL2
0.0143095	14	207	2.94791	DNA biosynthetic process	http://amigo.geneontology.org/amigo/term/GO:0071897	RFC2 POLQ PRKCQ RPA3 MAD2L2 CHTF18 WRAP53 DTL PCLAF TK1 SPHK1 AURKB ISG15 UBA52
0.0143095	24	479	2.1839	Regulation of mitotic cell cycle phase transition	http://amigo.geneontology.org/amigo/term/GO:1901990	TPX2 E2F1 UBE2S MAD2L2 CDC20 TUBA4A SEM1 PSMB7 NABP2 CYP1A1 PSMB6 DTL CTDSPL CDCA5 PSMC3 CDT1 CDK1 PSMD1 SFN AURKB RAD51B PSMD13 BLM UBA52
0.0166819	8	77	4.52852	Fatty acid beta-oxidation	http://amigo.geneontology.org/amigo/term/GO:0006635	HSD17B10 MCAT ABCD1 ETFB ECHS1 HADH ACOXL ECI1
0.0166819	37	889	1.81408	Regulation of cell cycle process	http://amigo.geneontology.org/amigo/term/GO:0010564	TACC3 TPX2 CDC45 KIF3B E2F1 CAV2 UBE2S GLI1 MAD2L2 CDC20 CIT TUBA4A SEM1 BRIP1 PSMB7 NABP2 CYP1A1 PSMB6 DTL CTDSPL CDCA5 MKI67 PTTG1 PSMC3 CENPV CDT1 CDK1 RRM2 PSMD1 RMI2 SFN SPHK1 AURKB RAD51B PSMD13 BLM UBA52
0.0169808	5	28	7.78339	Regulation of ubiquitin protein ligase activity	http://amigo.geneontology.org/amigo/term/GO:1904666	RPS20 UBE2S RPS15 MAD2L2 CDC20
0.0175495	6	43	6.08191	Maturation of SSU-rRNA from tricistronic rRNA transcript (SSU-rRNA, 5.8S rRNA, LSU-rRNA)	http://amigo.geneontology.org/amigo/term/GO:0000462	RPS19 FAM207A RPS14 RPS21 TBL3 PWP2
0.0175495	6	43	6.08191	Purine ribonucleoside monophosphate metabolic process	http://amigo.geneontology.org/amigo/term/GO:0009167	LHPP NT5C NT5E ATIC NUDT2 APRT
0.0175495	17	290	2.5551	Cellular ketone metabolic process	http://amigo.geneontology.org/amigo/term/GO:0042180	MLXIPL DKK3 HSD17B10 GSTZ1 TRIB3 ABCD1 LHB OAZ1 SEM1 PSMB7 PSMB6 AKR1C2 FDXR PSMC3 PSMD1 PSMD13 AKR1C1
0.017651	16	264	2.64164	Response to toxic substance	http://amigo.geneontology.org/amigo/term/GO:0009636	CPS1 GSTP1 GSTZ1 SDC1 MT2A PRDX5 TXNDC17 BRIP1 CYP1A1 LCN2 GSTO1 CDK1 MGMT TXNRD2 MT1X UBA52
0.0195306	30	675	1.9372	Monocarboxylic acid metabolic process	http://amigo.geneontology.org/amigo/term/GO:0032787	MLXIPL LYPLA2 MSMO1 HSD17B10 GSTP1 PHGDH ACOT7 SLC16A8 MCAT PNPLA3 GSTZ1 TRIB3 ABCD1 FAH ETFB GALK1 MTHFD1L EDN2 ECHS1 HADH CYP1A1 NUDT7 THNSL2 PTGES2 AKR1C2 ACOXL LIPH ECI1 DCXR AKR1C1
0.0201858	8	80	4.3587	Nucleoside monophosphate metabolic process	http://amigo.geneontology.org/amigo/term/GO:0009123	LHPP NT5C NT5E ATIC AK7 NUDT2 TK1 APRT
0.0206251	27	585	2.01171	Regulation of cell cycle phase transition	http://amigo.geneontology.org/amigo/term/GO:1901987	TPX2 CDC45 E2F1 UBE2S GLI1 MAD2L2 CDC20 TUBA4A SEM1 BRIP1 PSMB7 NABP2 CYP1A1 PSMB6 DTL CTDSPL CDCA5 PSMC3 CDT1 CDK1 PSMD1 SFN AURKB RAD51B PSMD13 BLM UBA52
0.0208556	12	168	3.11336	Oxidative phosphorylation	http://amigo.geneontology.org/amigo/term/GO:0006119	MLXIPL UQCRC1 ATP5F1D ABCD1 NDUFS8 ATP5F1E COX6B1 NDUFB9 COX6B2 STOML2 NDUFB8 CDK1
0.0214388	6	45	5.8116	Nucleotide-excision repair, DNA incision, 5 -to lesion	http://amigo.geneontology.org/amigo/term/GO:0006296	ERCC1 RFC2 NTHL1 RPA3 DDB2 UBA52
0.0216321	10	123	3.54366	Negative regulation of G2/M transition of mitotic cell cycle	http://amigo.geneontology.org/amigo/term/GO:0010972	SEM1 PSMB7 NABP2 PSMB6 PSMC3 CDK1 PSMD1 AURKB PSMD13 BLM
0.0220345	11	146	3.28395	Mitochondrial translation	http://amigo.geneontology.org/amigo/term/GO:0032543	MRPS34 MRPL28 MRPL37 MRPS15 MRPS2 TACO1 MRPL17 MRPL11 MRPL14 MRPL21 MRPL12
0.0228493	16	272	2.56394	Negative regulation of mitotic cell cycle phase transition	http://amigo.geneontology.org/amigo/term/GO:1901991	E2F1 MAD2L2 CDC20 SEM1 PSMB7 NABP2 PSMB6 CTDSPL PSMC3 CDT1 CDK1 PSMD1 SFN AURKB PSMD13 BLM
0.023409	6	46	5.68526	Purine nucleoside monophosphate metabolic process	http://amigo.geneontology.org/amigo/term/GO:0009126	LHPP NT5C NT5E ATIC NUDT2 APRT
0.0237795	10	125	3.48696	Negative regulation of cell cycle G2/M phase transition	http://amigo.geneontology.org/amigo/term/GO:1902750	SEM1 PSMB7 NABP2 PSMB6 PSMC3 CDK1 PSMD1 AURKB PSMD13 BLM
0.026047	8	84	4.15114	Pre-replicative complex assembly	http://amigo.geneontology.org/amigo/term/GO:0036388	SEM1 PSMB7 PSMB6 PSMC3 CDT1 PSMD1 PSMD13 UBA52
0.0275792	19	361	2.29405	Protein-containing complex disassembly	http://amigo.geneontology.org/amigo/term/GO:0032984	MRPS34 MRPL28 TPX2 SH3BP1 MRPL37 MRPS15 VAMP8 MRPS2 NFE2 KIF2C MRPL17 APEH SPTBN2 MRPL11 MRPL14 CIB1 KIF24 MRPL21 MRPL12
0.0275792	15	251	2.6048	Cellular lipid catabolic process	http://amigo.geneontology.org/amigo/term/GO:0044242	LYPLA2 CPS1 HSD17B10 MCAT PNPLA3 ABCD1 ETFB ECHS1 HADH NUDT7 ACOXL LIPH ECI1 FABP4 SPHK1
0.0277383	10	128	3.40523	Spindle assembly	http://amigo.geneontology.org/amigo/term/GO:0051225	ASPM TPX2 MISP MYBL2 KIF3B CDC20 TUBGCP2 RPS3 CCNB2 AURKB
0.028155	6	48	5.44837	Nucleotide-excision repair, DNA incision	http://amigo.geneontology.org/amigo/term/GO:0033683	ERCC1 RFC2 NTHL1 RPA3 DDB2 UBA52
0.0287658	42	1092	1.67642	Chromosome organization	http://amigo.geneontology.org/amigo/term/GO:0051276	ERCC1 TACC3 POLA2 RFC2 POLQ PRKCQ NUCKS1 SMC1B KIF22 CENPM DMC1 MRGBP RPA3 MAD2L2 CDC20 NFE2 CHTF18 DDB2 BRIP1 KNL1 NABP2 WRAP53 P3H4 KIF2C CDCA5 MKI67 CHAF1B LMNA RECQL4 PTTG1 CENPV CDT1 CHAF1A CDK1 RMI2 HASPIN AURKB BLM HMGN5 BAZ1A CENPW UBA52
0.0291478	4	19	9.17621	Negative regulation of double-strand break repair via homologous recombination	http://amigo.geneontology.org/amigo/term/GO:2000042	POLQ MAD2L2 RMI2 PARPBP
0.0302847	27	605	1.9452	Mitochondrion organization	http://amigo.geneontology.org/amigo/term/GO:0007005	TFB1M HSD17B10 ATP5F1D TIMM13 BIK TSPO E2F1 CAV2 NDUFS8 OPTN ATP5F1E ROMO1 TIMM17B TIMM8A TOMM40 CLUH TACO1 NDUFB9 CHCHD6 LMNA STOML2 NDUFB8 PARL SFN BOK ATAD3A INF2
0.0302847	7	67	4.55387	Nuclear DNA replication	http://amigo.geneontology.org/amigo/term/GO:0033260	POLA2 RFC2 CDC45 RPA3 CHTF18 CDT1 BLM
0.0308079	14	229	2.66471	Ribonucleoprotein complex assembly	http://amigo.geneontology.org/amigo/term/GO:0022618	RPS5 RPLP0 RPL3 RPS19 RPL24 RPS15 SNRPD2 LSM4 RPL13A RPS14 RPSA RPL38 RRP7A PWP2
0.0308079	14	229	2.66471	Regulation of protein ubiquitination	http://amigo.geneontology.org/amigo/term/GO:0031396	RPS20 FKBP1A TSPO TRIB3 UBE2S RPS15 FBXO2 MAD2L2 CDC20 PRR7 FANCI RPS3 SPHK1 ISG15
0.0316636	3	9	14.529	Folic acid-containing compound biosynthetic process	http://amigo.geneontology.org/amigo/term/GO:0009396	MTHFD1L FPGS ATIC
0.031811	9	109	3.59893	Fatty acid catabolic process	http://amigo.geneontology.org/amigo/term/GO:0009062	HSD17B10 MCAT ABCD1 ETFB ECHS1 HADH NUDT7 ACOXL ECI1
0.0325415	17	312	2.37493	Nuclear chromosome segregation	http://amigo.geneontology.org/amigo/term/GO:0098813	TACC3 SMC1B KIF22 DMC1 MAD2L2 CDC20 BRIP1 KNL1 P3H4 KIF2C CDCA5 PTTG1 CDT1 CDK1 RMI2 HASPIN AURKB
0.0326392	12	180	2.9058	Telomere maintenance	http://amigo.geneontology.org/amigo/term/GO:0000723	ERCC1 POLA2 RFC2 PRKCQ RPA3 CHTF18 NABP2 WRAP53 LMNA RECQL4 AURKB BLM
0.03742	7	70	4.3587	Regulation of sister chromatid segregation	http://amigo.geneontology.org/amigo/term/GO:0033045	TACC3 MAD2L2 CDC20 PTTG1 CDT1 RMI2 AURKB
0.0374655	18	345	2.2741	Protein-DNA complex assembly	http://amigo.geneontology.org/amigo/term/GO:0065004	CDC45 CENPM DMC1 RPA3 SEM1 DDB2 PSMB7 KNL1 PSMB6 CHAF1B PSMC3 CENPV CDT1 CHAF1A PSMD1 PSMD13 CENPW UBA52
0.0391368	14	236	2.58567	Ribonucleoprotein complex subunit organization	http://amigo.geneontology.org/amigo/term/GO:0071826	RPS5 RPLP0 RPL3 RPS19 RPL24 RPS15 SNRPD2 LSM4 RPL13A RPS14 RPSA RPL38 RRP7A PWP2
0.0393224	4	21	8.30229	Purine ribonucleoside monophosphate biosynthetic process	http://amigo.geneontology.org/amigo/term/GO:0009168	LHPP ATIC NUDT2 APRT
0.0393224	4	21	8.30229	Error-prone translesion synthesis	http://amigo.geneontology.org/amigo/term/GO:0042276	RFC2 RPA3 MAD2L2 UBA52
0.0393224	7	71	4.29731	Cell cycle DNA replication	http://amigo.geneontology.org/amigo/term/GO:0044786	POLA2 RFC2 CDC45 RPA3 CHTF18 CDT1 BLM
0.0423946	5	36	6.05375	Telomere maintenance via semi-conservative replication	http://amigo.geneontology.org/amigo/term/GO:0032201	POLA2 RFC2 RPA3 CHTF18 BLM
0.0461316	14	241	2.53202	Regulation of G2/M transition of mitotic cell cycle	http://amigo.geneontology.org/amigo/term/GO:0010389	TPX2 TUBA4A SEM1 PSMB7 NABP2 PSMB6 DTL PSMC3 CDK1 PSMD1 AURKB RAD51B PSMD13 BLM
0.0472836	18	354	2.21629	DNA recombination	http://amigo.geneontology.org/amigo/term/GO:0006310	ERCC1 POLQ NUCKS1 CDC45 DMC1 RPA3 MAD2L2 MND1 SEM1 GINS2 BRIP1 NABP2 WRAP53 RECQL4 RMI2 RAD51B PARPBP BLM
0.0472836	5	37	5.89013	Negative regulation of DNA repair	http://amigo.geneontology.org/amigo/term/GO:0045738	POLQ MAD2L2 RPS3 RMI2 PARPBP
0.0490451	2	3	29.058	DNA replication preinitiation complex assembly	http://amigo.geneontology.org/amigo/term/GO:0071163	CDC45 CDT1
0.0499204	13	217	2.6112	Aerobic respiration	http://amigo.geneontology.org/amigo/term/GO:0009060	MLXIPL UQCRC1 ATP5F1D ABCD1 NDUFS8 ATP5F1E COX6B1 MDH2 NDUFB9 COX6B2 STOML2 NDUFB8 CDK1
0.0508816	18	357	2.19766	Negative regulation of cell cycle phase transition	http://amigo.geneontology.org/amigo/term/GO:1901988	CDC45 E2F1 MAD2L2 CDC20 SEM1 BRIP1 PSMB7 NABP2 PSMB6 CTDSPL PSMC3 CDT1 CDK1 PSMD1 SFN AURKB PSMD13 BLM
0.051096	16	300	2.32464	G2/M transition of mitotic cell cycle	http://amigo.geneontology.org/amigo/term/GO:0000086	TPX2 OPTN TUBA4A SEM1 PSMB7 NABP2 PSMB6 DTL CCNB2 PSMC3 CDK1 PSMD1 AURKB RAD51B PSMD13 BLM
0.0515763	5	38	5.73513	DNA damage response, detection of DNA damage	http://amigo.geneontology.org/amigo/term/GO:0042769	RFC2 RPA3 DTL RPS3 UBA52
0.0521282	4	23	7.58035	Purine nucleoside monophosphate biosynthetic process	http://amigo.geneontology.org/amigo/term/GO:0009127	LHPP ATIC NUDT2 APRT
0.0521282	4	23	7.58035	Fatty acid derivative catabolic process	http://amigo.geneontology.org/amigo/term/GO:1901569	LYPLA2 ACOT7 ABCD1 NUDT7
0.0532745	8	97	3.5948	Protein localization to chromosome	http://amigo.geneontology.org/amigo/term/GO:0034502	KNL1 NABP2 WRAP53 CDCA5 CDT1 CDK1 HASPIN AURKB
0.0545413	12	194	2.6961	Telomere organization	http://amigo.geneontology.org/amigo/term/GO:0032200	ERCC1 POLA2 RFC2 PRKCQ RPA3 CHTF18 NABP2 WRAP53 LMNA RECQL4 AURKB BLM
0.0559105	5	39	5.58808	Purine ribonucleotide catabolic process	http://amigo.geneontology.org/amigo/term/GO:0009154	ACOT7 ABCD1 NT5C NT5E NUDT7
0.0559105	5	39	5.58808	Cellular response to fatty acid	http://amigo.geneontology.org/amigo/term/GO:0071398	CPS1 E2F1 AKR1C2 AKR1C1 NME1
0.0562637	6	57	4.58811	Maturation of SSU-rRNA	http://amigo.geneontology.org/amigo/term/GO:0030490	RPS19 FAM207A RPS14 RPS21 TBL3 PWP2
0.0574882	21	453	2.02059	Small molecule catabolic process	http://amigo.geneontology.org/amigo/term/GO:0044282	HSD17B10 MCAT GSTZ1 ABCD1 FAH ETFB GALK1 NT5C ECHS1 TST ALDH3B2 NT5E HADH CYP1A1 NUDT7 THNSL2 TKFC ACOXL ECI1 DCXR RBKS
0.0576275	12	196	2.66859	Mitotic sister chromatid segregation	http://amigo.geneontology.org/amigo/term/GO:0000070	TACC3 SMC1B KIF22 MAD2L2 CDC20 KIF2C CDCA5 PTTG1 CDT1 CDK1 HASPIN AURKB
0.0582755	14	250	2.44087	Regulation of cell cycle G2/M phase transition	http://amigo.geneontology.org/amigo/term/GO:1902749	TPX2 TUBA4A SEM1 PSMB7 NABP2 PSMB6 DTL PSMC3 CDK1 PSMD1 AURKB RAD51B PSMD13 BLM
0.058612	19	394	2.10191	Protein-DNA complex subunit organization	http://amigo.geneontology.org/amigo/term/GO:0071824	CDC45 CENPM DMC1 RPA3 NFE2 SEM1 DDB2 PSMB7 KNL1 PSMB6 CHAF1B PSMC3 CENPV CDT1 CHAF1A PSMD1 PSMD13 CENPW UBA52
0.0597291	6	58	4.509	Regulation of ubiquitin-protein transferase activity	http://amigo.geneontology.org/amigo/term/GO:0051438	RPS20 TRIB3 UBE2S RPS15 MAD2L2 CDC20
0.0622138	13	225	2.51836	Sister chromatid segregation	http://amigo.geneontology.org/amigo/term/GO:0000819	TACC3 SMC1B KIF22 MAD2L2 CDC20 KIF2C CDCA5 PTTG1 CDT1 CDK1 RMI2 HASPIN AURKB
0.0632598	11	173	2.77143	Fatty acid biosynthetic process	http://amigo.geneontology.org/amigo/term/GO:0006633	MLXIPL GSTP1 ACOT7 MCAT TRIB3 ABCD1 EDN2 CYP1A1 THNSL2 PTGES2 LIPH
0.0633278	29	713	1.77282	Carbohydrate derivative biosynthetic process	http://amigo.geneontology.org/amigo/term/GO:1901137	XYLT2 ST6GALNAC2 NANS ACOT7 ATP5F1D GSTZ1 PIGU GMDS SDC1 B4GALT2 GALNT12 HS3ST2 ATP5F1E NT5E ATIC NUDT2 STOML2 LARGE2 MVD TK1 DCXR RRM2 CSPG4 FOXL1 B3GNT3 MUC16 POMK APRT NME1
0.0657797	13	227	2.49617	Regulation of chromosome organization	http://amigo.geneontology.org/amigo/term/GO:0033044	ERCC1 TACC3 PRKCQ MAD2L2 CDC20 NABP2 CDCA5 LMNA PTTG1 CENPV CDT1 RMI2 AURKB
0.0657797	16	311	2.24242	Cell cycle G2/M phase transition	http://amigo.geneontology.org/amigo/term/GO:0044839	TPX2 OPTN TUBA4A SEM1 PSMB7 NABP2 PSMB6 DTL CCNB2 PSMC3 CDK1 PSMD1 AURKB RAD51B PSMD13 BLM
0.066523	19	400	2.07038	Cellular amino acid metabolic process	http://amigo.geneontology.org/amigo/term/GO:0006520	CPS1 HSD17B10 PHGDH GSTZ1 GSS FAH OAZ1 FARSB ECHS1 SEM1 TST FPGS PSMB7 PSMB6 THNSL2 PSMC3 PSMD1 PSMD13 ACY1
0.066523	8	102	3.41859	Glycosyl compound metabolic process	http://amigo.geneontology.org/amigo/term/GO:1901657	NT5C MACROD1 NT5E ATIC AKR1C2 TK1 AKR1C1 APRT
0.0678639	6	60	4.3587	Ribonucleoside monophosphate metabolic process	http://amigo.geneontology.org/amigo/term/GO:0009161	LHPP NT5C NT5E ATIC NUDT2 APRT
0.0702797	5	42	5.18893	Negative regulation of sister chromatid segregation	http://amigo.geneontology.org/amigo/term/GO:0033046	MAD2L2 CDC20 PTTG1 CDT1 AURKB
0.0702797	5	42	5.18893	Negative regulation of mitotic sister chromatid segregation	http://amigo.geneontology.org/amigo/term/GO:0033048	MAD2L2 CDC20 PTTG1 CDT1 AURKB
0.0702797	14	257	2.37439	Cellular respiration	http://amigo.geneontology.org/amigo/term/GO:0045333	MLXIPL UQCRC1 ATP5F1D ABCD1 ETFB NDUFS8 ATP5F1E COX6B1 MDH2 NDUFB9 COX6B2 STOML2 NDUFB8 CDK1
0.0702797	5	42	5.18893	Negative regulation of mitotic sister chromatid separation	http://amigo.geneontology.org/amigo/term/GO:2000816	MAD2L2 CDC20 PTTG1 CDT1 AURKB
0.0760807	12	205	2.55143	Regulation of cellular ketone metabolic process	http://amigo.geneontology.org/amigo/term/GO:0010565	MLXIPL DKK3 GSTZ1 TRIB3 ABCD1 OAZ1 SEM1 PSMB7 PSMB6 PSMC3 PSMD1 PSMD13
0.0763365	3	13	10.0585	Negative regulation of ubiquitin protein ligase activity	http://amigo.geneontology.org/amigo/term/GO:1904667	RPS20 RPS15 MAD2L2
0.0771277	6	62	4.2181	Inner mitochondrial membrane organization	http://amigo.geneontology.org/amigo/term/GO:0007007	ATP5F1D TIMM13 ATP5F1E ROMO1 TIMM8A CHCHD6
0.0772787	7	83	3.67601	Regulation of cellular amino acid metabolic process	http://amigo.geneontology.org/amigo/term/GO:0006521	OAZ1 SEM1 PSMB7 PSMB6 PSMC3 PSMD1 PSMD13
0.0772787	2	4	21.7935	Response to jasmonic acid	http://amigo.geneontology.org/amigo/term/GO:0009753	AKR1C2 AKR1C1
0.0772787	2	4	21.7935	Establishment or maintenance of microtubule cytoskeleton polarity	http://amigo.geneontology.org/amigo/term/GO:0030951	KIF2C LMNA
0.0772787	2	4	21.7935	Medium-chain fatty-acyl-CoA metabolic process	http://amigo.geneontology.org/amigo/term/GO:0036112	ACOT7 NUDT7
0.0772787	2	4	21.7935	Cellular response to jasmonic acid stimulus	http://amigo.geneontology.org/amigo/term/GO:0071395	AKR1C2 AKR1C1
0.0772787	2	4	21.7935	Cyclic-GMP-AMP transmembrane import across plasma membrane	http://amigo.geneontology.org/amigo/term/GO:0140361	LRRC8E SLC19A1
0.0772787	14	261	2.338	Regulation of protein modification by small protein conjugation or removal	http://amigo.geneontology.org/amigo/term/GO:1903320	RPS20 FKBP1A TSPO TRIB3 UBE2S RPS15 FBXO2 MAD2L2 CDC20 PRR7 FANCI RPS3 SPHK1 ISG15
0.0789678	5	44	4.95307	Nucleoside monophosphate biosynthetic process	http://amigo.geneontology.org/amigo/term/GO:0009124	LHPP ATIC NUDT2 TK1 APRT
0.0789678	5	44	4.95307	Ribonucleotide catabolic process	http://amigo.geneontology.org/amigo/term/GO:0009261	ACOT7 ABCD1 NT5C NT5E NUDT7
0.0789678	6	63	4.15114	Regulation of mitotic sister chromatid separation	http://amigo.geneontology.org/amigo/term/GO:0010965	TACC3 MAD2L2 CDC20 PTTG1 CDT1 AURKB
0.0789678	4	27	6.45733	Carbohydrate phosphorylation	http://amigo.geneontology.org/amigo/term/GO:0046835	GALK1 TKFC RBKS POMK
0.0789678	5	44	4.95307	Negative regulation of chromosome segregation	http://amigo.geneontology.org/amigo/term/GO:0051985	MAD2L2 CDC20 PTTG1 CDT1 AURKB
0.0789678	4	27	6.45733	Regulation of telomere capping	http://amigo.geneontology.org/amigo/term/GO:1904353	ERCC1 PRKCQ NABP2 AURKB
0.0789678	5	44	4.95307	Negative regulation of chromosome separation	http://amigo.geneontology.org/amigo/term/GO:1905819	MAD2L2 CDC20 PTTG1 CDT1 AURKB
0.0801499	13	236	2.40098	Negative regulation of Wnt signaling pathway	http://amigo.geneontology.org/amigo/term/GO:0030178	DKK3 GLI1 MAD2L2 SEM1 PSMB7 PSMB6 SOX17 PSMC3 IGFBP6 PSMD1 PSMD13 TRABD2A APCDD1L
0.0836431	4	28	6.22671	C21-steroid hormone biosynthetic process	http://amigo.geneontology.org/amigo/term/GO:0006700	DKK3 TSPO LHB FDXR
0.0836431	4	28	6.22671	Folic acid-containing compound metabolic process	http://amigo.geneontology.org/amigo/term/GO:0006760	MTHFD1L FPGS ATIC SLC19A1
0.0836431	4	28	6.22671	Mitotic sister chromatid cohesion	http://amigo.geneontology.org/amigo/term/GO:0007064	SMC1B CDC20 CDCA5 HASPIN
0.0836431	20	446	1.95457	Negative regulation of cell cycle process	http://amigo.geneontology.org/amigo/term/GO:0010948	CDC45 E2F1 MAD2L2 CDC20 SEM1 BRIP1 PSMB7 NABP2 PSMB6 CTDSPL PTTG1 PSMC3 CDT1 CDK1 RRM2 PSMD1 SFN AURKB PSMD13 BLM
0.0836431	4	28	6.22671	C4-dicarboxylate transport	http://amigo.geneontology.org/amigo/term/GO:0015740	SLC1A6 SLC13A3 LRRC8E SLC25A10
0.0836431	5	45	4.843	Regulation of mitotic sister chromatid segregation	http://amigo.geneontology.org/amigo/term/GO:0033047	MAD2L2 CDC20 PTTG1 CDT1 AURKB
0.0836431	3	14	9.34007	Pteridine-containing compound biosynthetic process	http://amigo.geneontology.org/amigo/term/GO:0042559	MTHFD1L FPGS ATIC
0.0836431	3	14	9.34007	Response to interleukin-17	http://amigo.geneontology.org/amigo/term/GO:0097396	TRAF2 IL17RE IKBKE
0.0836431	3	14	9.34007	Cellular response to interleukin-17	http://amigo.geneontology.org/amigo/term/GO:0097398	TRAF2 IL17RE IKBKE
0.0836431	3	14	9.34007	Interleukin-17-mediated signaling pathway	http://amigo.geneontology.org/amigo/term/GO:0097400	TRAF2 IL17RE IKBKE
0.0856707	6	65	4.02342	Mitotic sister chromatid separation	http://amigo.geneontology.org/amigo/term/GO:0051306	TACC3 MAD2L2 CDC20 PTTG1 CDT1 AURKB
0.0884239	8	110	3.16996	Fatty acid oxidation	http://amigo.geneontology.org/amigo/term/GO:0019395	HSD17B10 MCAT ABCD1 ETFB ECHS1 HADH ACOXL ECI1
0.0888023	5	46	4.73772	Purine nucleotide catabolic process	http://amigo.geneontology.org/amigo/term/GO:0006195	ACOT7 ABCD1 NT5C NT5E NUDT7
0.0888023	15	298	2.19398	Regulation of mRNA catabolic process	http://amigo.geneontology.org/amigo/term/GO:0061013	IGF2BP2 E2F1 HSPB1 TRAF2 SEM1 LSM4 IGF2BP3 PSMB7 PSMB6 PSMC3 PSMD1 PKP3 PSMD13 UBA52 IKBKE
0.0888023	5	46	4.73772	Regulation of DNA-dependent DNA replication	http://amigo.geneontology.org/amigo/term/GO:0090329	RFC2 CHTF18 STOML2 CDT1 BLM
0.0902671	52	1553	1.45945	Cytoskeleton organization	http://amigo.geneontology.org/amigo/term/GO:0007010	TACC3 EHD2 TMSB10 CNTLN ASPM WDR62 TPX2 BIRC5 EZR MISP SH3BP1 CENPM RANGAP1 MYBL2 KIF3B TNNT1 MAD2L2 CDC20 PTPA TTLL5 CIT ARHGAP40 TUBA4A KRT17 BST2 TUBGCP2 PDLIM4 KNL1 CFAP74 KIF2C RPS3 CDC42EP2 CCNB2 LMNA SPC24 SKA3 PACSIN3 PCLAF DNAAF3 CDK1 CAVIN3 RHOD SPTBN2 AURKB TACSTD2 CIB1 KIF24 KRT14 PARVB MYO1C INF2 ARL2
0.0921889	4	29	6.012	Ribosomal large subunit assembly	http://amigo.geneontology.org/amigo/term/GO:0000027	RPLP0 RPL3 RPL24 RPL38
0.0953383	6	67	3.90331	Interleukin-2 production	http://amigo.geneontology.org/amigo/term/GO:0032623	PRKCQ EZR TRAF2 SFTPD RPS3 STOML2
0.0953383	6	67	3.90331	Regulation of interleukin-2 production	http://amigo.geneontology.org/amigo/term/GO:0032663	PRKCQ EZR TRAF2 SFTPD RPS3 STOML2
0.0953383	16	331	2.10692	Carboxylic acid biosynthetic process	http://amigo.geneontology.org/amigo/term/GO:0046394	MLXIPL CPS1 HSD17B10 GSTP1 PHGDH ACOT7 MCAT TRIB3 ABCD1 MTHFD1L EDN2 CYP1A1 THNSL2 PTGES2 LIPH UROS
0.0953383	5	47	4.63691	Response to copper ion	http://amigo.geneontology.org/amigo/term/GO:0046688	ATP5F1D MT2A CYP1A1 CDK1 MT1X
0.096225	3	15	8.7174	Keratinocyte development	http://amigo.geneontology.org/amigo/term/GO:0003334	EXPH5 ABCA12 SFN
0.096225	3	15	8.7174	Protein insertion into mitochondrial inner membrane	http://amigo.geneontology.org/amigo/term/GO:0045039	TIMM13 ROMO1 TIMM8A
0.096225	3	15	8.7174	Attachment of mitotic spindle microtubules to kinetochore	http://amigo.geneontology.org/amigo/term/GO:0051315	KIF2C CDT1 AURKB
0.0972444	45	1308	1.49955	Cellular response to cytokine stimulus	http://amigo.geneontology.org/amigo/term/GO:0071345	CRLF1 IL32 CAMK2B GSTP1 RPLP0 BIRC5 RPL3 MYBL2 CCL22 SDC1 LRAT MT2A EDN2 TRAF2 SEM1 TXNDC17 BST2 PSMB7 ATIC PSMB6 RPL13A LCN2 GSTO1 RPS3 CDC42EP2 IL17RE SOX17 PSMC3 BOLA2B AGPAT2 FABP4 ISG20 PSMD1 SPHK1 TRAIP CIB1 PSMD13 IFITM1 TNFRSF18 MT1X ISG15 MYO1C UBA52 IKBKE CD24
0.0973977	8	113	3.08581	Regulation of DNA replication	http://amigo.geneontology.org/amigo/term/GO:0006275	RFC2 NUCKS1 GLI1 CHTF18 STOML2 CDT1 CDK1 BLM
0.0973977	24	584	1.79125	Response to inorganic substance	http://amigo.geneontology.org/amigo/term/GO:0010035	ERCC1 CPS1 ATP5F1D TSPO GSS SDC1 MT2A TRAF2 ATIC CYP1A1 LCN2 RPS3 CDK1 FABP4 SYT12 FOSL1 SPHK1 CPNE7 COL18A1 TXNRD2 KRT14 MT1X UROS BLM
0.0973977	16	333	2.09427	Organic acid biosynthetic process	http://amigo.geneontology.org/amigo/term/GO:0016053	MLXIPL CPS1 HSD17B10 GSTP1 PHGDH ACOT7 MCAT TRIB3 ABCD1 MTHFD1L EDN2 CYP1A1 THNSL2 PTGES2 LIPH UROS
0.0973977	14	274	2.22707	Organic acid catabolic process	http://amigo.geneontology.org/amigo/term/GO:0016054	HSD17B10 MCAT GSTZ1 ABCD1 FAH ETFB ECHS1 TST HADH NUDT7 THNSL2 ACOXL ECI1 DCXR
0.1011	8	114	3.05874	SCF-dependent proteasomal ubiquitin-dependent protein catabolic process	http://amigo.geneontology.org/amigo/term/GO:0031146	FBXO2 SEM1 PSMB7 PSMB6 FBXL18 PSMC3 PSMD1 PSMD13
0.104577	15	306	2.13662	Mitochondrial transport	http://amigo.geneontology.org/amigo/term/GO:0006839	ATP5F1D TIMM13 TSPO E2F1 ATP5F1E ROMO1 TIMM17B TIMM8A TST TOMM40 STOML2 PARL SFN BOK SLC25A10
0.104724	42	1208	1.51544	Carbohydrate derivative metabolic process	http://amigo.geneontology.org/amigo/term/GO:1901135	MLXIPL XYLT2 NTHL1 ST6GALNAC2 NANS ACOT7 ATP5F1D GSTZ1 PIGU ABCD1 GALK1 GMDS SDC1 FBXO2 B4GALT2 GALNT12 HS3ST2 ATP5F1E NT5C MACROD1 NT5E ATIC NUDT7 TKFC AKR1C2 NUDT2 STOML2 LARGE2 MVD TK1 DCXR RBKS RRM2 CSPG4 FOXL1 B3GNT3 MUC16 POMK AKR1C1 APRT UBA52 NME1
0.104843	12	220	2.37747	Tumor necrosis factor-mediated signaling pathway	http://amigo.geneontology.org/amigo/term/GO:0033209	GSTP1 TRAF2 SEM1 TXNDC17 PSMB7 PSMB6 PSMC3 PSMD1 SPHK1 TRAIP PSMD13 TNFRSF18
0.106324	5	49	4.44765	Prostanoid metabolic process	http://amigo.geneontology.org/amigo/term/GO:0006692	GSTP1 EDN2 PTGES2 AKR1C2 AKR1C1
0.106324	5	49	4.44765	Prostaglandin metabolic process	http://amigo.geneontology.org/amigo/term/GO:0006693	GSTP1 EDN2 PTGES2 AKR1C2 AKR1C1
0.106324	5	49	4.44765	Regulation of double-strand break repair via homologous recombination	http://amigo.geneontology.org/amigo/term/GO:0010569	POLQ MAD2L2 WRAP53 RMI2 PARPBP
0.107545	7	92	3.3164	Regulation of hematopoietic stem cell differentiation	http://amigo.geneontology.org/amigo/term/GO:1902036	TCF15 SEM1 PSMB7 PSMB6 PSMC3 PSMD1 PSMD13
0.108394	8	116	3.006	Lipid oxidation	http://amigo.geneontology.org/amigo/term/GO:0034440	HSD17B10 MCAT ABCD1 ETFB ECHS1 HADH ACOXL ECI1
0.108991	6	70	3.73603	Regulation of chromosome separation	http://amigo.geneontology.org/amigo/term/GO:1905818	TACC3 MAD2L2 CDC20 PTTG1 CDT1 AURKB
0.112623	7	93	3.28074	Negative regulation of protein ubiquitination	http://amigo.geneontology.org/amigo/term/GO:0031397	RPS20 TSPO RPS15 MAD2L2 PRR7 RPS3 ISG15
0.114312	18	402	1.95166	Response to tumor necrosis factor	http://amigo.geneontology.org/amigo/term/GO:0034612	GSTP1 GSS CCL22 TRAF2 SEM1 TXNDC17 PSMB7 PSMB6 LCN2 RPS3 PSMC3 FABP4 PSMD1 SPHK1 TRAIP CIB1 PSMD13 TNFRSF18
0.116572	17	372	1.99188	Canonical Wnt signaling pathway	http://amigo.geneontology.org/amigo/term/GO:0060070	DKK3 ASPM GLI1 WNT5B SDC1 MAD2L2 SEM1 WNT10A PSMB7 PSMB6 WNT9A SOX17 PSMC3 IGFBP6 PSMD1 PSMD13 WNT7B
0.117007	24	596	1.75518	Negative regulation of protein modification process	http://amigo.geneontology.org/amigo/term/GO:0031400	RPS20 MLXIPL GSTP1 FKBP1A TSPO TRIB3 RASIP1 FKBP8 HSPB1 RPS15 MAD2L2 PTPA CIT PRR7 CBLC CTDSPL RPS3 PIP5KL1 PBK FABP4 SFN CIB1 ISG15 PRKAR1B
0.117354	16	342	2.03916	Negative regulation of mitotic cell cycle	http://amigo.geneontology.org/amigo/term/GO:0045930	E2F1 MAD2L2 CDC20 SEM1 PSMB7 NABP2 PSMB6 CTDSPL PSMC3 CDT1 CDK1 PSMD1 SFN AURKB PSMD13 BLM
0.118156	17	373	1.98654	Cellular response to tumor necrosis factor	http://amigo.geneontology.org/amigo/term/GO:0071356	GSTP1 CCL22 TRAF2 SEM1 TXNDC17 PSMB7 PSMB6 LCN2 RPS3 PSMC3 FABP4 PSMD1 SPHK1 TRAIP CIB1 PSMD13 TNFRSF18
0.120437	6	72	3.63225	Nucleotide catabolic process	http://amigo.geneontology.org/amigo/term/GO:0009166	NTHL1 ACOT7 ABCD1 NT5C NT5E NUDT7
0.120437	47	1404	1.45911	Response to cytokine	http://amigo.geneontology.org/amigo/term/GO:0034097	CRLF1 IL32 CAMK2B GSTP1 RPLP0 BIRC5 RPL3 GSS MYBL2 CCL22 SDC1 LRAT MT2A EDN2 TRAF2 SEM1 TXNDC17 BST2 PSMB7 ATIC PSMB6 RPL13A LCN2 GSTO1 RPS3 CDC42EP2 IL17RE SOX17 PSMC3 BOLA2B AGPAT2 FABP4 ISG20 PSMD1 FOSL1 SPHK1 TRAIP CIB1 PSMD13 IFITM1 TNFRSF18 MT1X ISG15 MYO1C UBA52 IKBKE CD24
0.120437	5	51	4.27324	Purine-containing compound catabolic process	http://amigo.geneontology.org/amigo/term/GO:0072523	ACOT7 ABCD1 NT5C NT5E NUDT7
0.120516	8	119	2.93022	DNA duplex unwinding	http://amigo.geneontology.org/amigo/term/GO:0032508	RFC2 POLQ CHTF18 DDB2 BRIP1 RECQL4 BLM UBA52
0.120878	16	344	2.0273	Regulation of protein serine/threonine kinase activity	http://amigo.geneontology.org/amigo/term/GO:0071900	GSTP1 TRIB3 RASIP1 CIT MAP2K2 TRAF2 CCNJL CBLC RPS3 CCNB2 CKS1B SFN CIB1 PRKAR1B BLM CD24
0.123048	3	17	7.69182	AMP metabolic process	http://amigo.geneontology.org/amigo/term/GO:0046033	NT5E NUDT2 APRT
0.123048	3	17	7.69182	Negative regulation of cell division	http://amigo.geneontology.org/amigo/term/GO:0051782	ASPM AURKB BLM
0.123048	12	227	2.30416	Monocarboxylic acid biosynthetic process	http://amigo.geneontology.org/amigo/term/GO:0072330	MLXIPL HSD17B10 GSTP1 ACOT7 MCAT TRIB3 ABCD1 EDN2 CYP1A1 THNSL2 PTGES2 LIPH
0.123564	23	568	1.76497	Wnt signaling pathway	http://amigo.geneontology.org/amigo/term/GO:0016055	AP2S1 DKK3 ASPM GLI1 WNT5B SDC1 MAD2L2 SEM1 WNT10A PSMB7 PSMB6 WNT9A SOX17 PSMC3 IGFBP6 PSMD1 FOXL1 PSMD13 TRABD2A WNT7B APCDD1L UBA52 CD24
0.125181	6	73	3.58249	Nucleoside metabolic process	http://amigo.geneontology.org/amigo/term/GO:0009116	NT5C MACROD1 NT5E ATIC TK1 APRT
0.125925	9	146	2.68687	Meiosis I cell cycle process	http://amigo.geneontology.org/amigo/term/GO:0061982	ERCC1 DMC1 MND1 BRIP1 P3H4 CCNB2 PTTG1 RAD51B PSMD13
0.127158	23	570	1.75877	Cell-cell signaling by wnt	http://amigo.geneontology.org/amigo/term/GO:0198738	AP2S1 DKK3 ASPM GLI1 WNT5B SDC1 MAD2L2 SEM1 WNT10A PSMB7 PSMB6 WNT9A SOX17 PSMC3 IGFBP6 PSMD1 FOXL1 PSMD13 TRABD2A WNT7B APCDD1L UBA52 CD24
0.131371	7	97	3.14545	Regulation of transcription from RNA polymerase II promoter in response to hypoxia	http://amigo.geneontology.org/amigo/term/GO:0061418	SEM1 PSMB7 PSMB6 PSMC3 PSMD1 PSMD13 UBA52
0.133669	11	202	2.37355	Steroid biosynthetic process	http://amigo.geneontology.org/amigo/term/GO:0006694	DKK3 MSMO1 HSD17B10 TSPO LHB CYP1A1 EBP FDXR CYB5R2 MVD HSD11B2
0.133669	5	53	4.11198	Mitotic metaphase plate congression	http://amigo.geneontology.org/amigo/term/GO:0007080	KIF22 KIF2C CDCA5 CDT1 AURKB
0.133669	5	53	4.11198	Neutral lipid catabolic process	http://amigo.geneontology.org/amigo/term/GO:0046461	LYPLA2 CPS1 PNPLA3 LIPH FABP4
0.133669	5	53	4.11198	Acylglycerol catabolic process	http://amigo.geneontology.org/amigo/term/GO:0046464	LYPLA2 CPS1 PNPLA3 LIPH FABP4
0.133844	4	34	5.12788	Regulation of transcription involved in G1/S transition of mitotic cell cycle	http://amigo.geneontology.org/amigo/term/GO:0000083	CDC45 E2F1 CDT1 RRM2
0.133844	2	6	14.529	AMP biosynthetic process	http://amigo.geneontology.org/amigo/term/GO:0006167	NUDT2 APRT
0.133844	2	6	14.529	Tyrosine catabolic process	http://amigo.geneontology.org/amigo/term/GO:0006572	GSTZ1 FAH
0.133844	2	6	14.529	Positive regulation of plasminogen activation	http://amigo.geneontology.org/amigo/term/GO:0010756	PLGRKT F12
0.133844	2	6	14.529	Cyclic nucleotide transport	http://amigo.geneontology.org/amigo/term/GO:0070729	LRRC8E SLC19A1
0.133844	2	6	14.529	Guanine nucleotide transmembrane transport	http://amigo.geneontology.org/amigo/term/GO:1903790	LRRC8E SLC19A1
0.133953	14	290	2.1042	Regulation of mRNA stability	http://amigo.geneontology.org/amigo/term/GO:0043488	IGF2BP2 E2F1 HSPB1 TRAF2 SEM1 LSM4 IGF2BP3 PSMB7 PSMB6 PSMC3 PSMD1 PSMD13 UBA52 IKBKE
0.134837	3	18	7.2645	Progesterone metabolic process	http://amigo.geneontology.org/amigo/term/GO:0042448	LHB AKR1C2 AKR1C1
0.134837	3	18	7.2645	Clathrin coat assembly	http://amigo.geneontology.org/amigo/term/GO:0048268	AP2S1 FCHO1 CLTB
0.134837	3	18	7.2645	Positive regulation of telomere capping	http://amigo.geneontology.org/amigo/term/GO:1904355	PRKCQ NABP2 AURKB
0.137709	5	54	4.03583	Exit from mitosis	http://amigo.geneontology.org/amigo/term/GO:0010458	UBE2S RPL24 CDC20 CDCA5 UBA52
0.137709	5	54	4.03583	Sulfur compound catabolic process	http://amigo.geneontology.org/amigo/term/GO:0044273	ACOT7 ABCD1 TST NUDT7 CSPG4
0.137709	5	54	4.03583	Protein insertion into mitochondrial membrane	http://amigo.geneontology.org/amigo/term/GO:0051204	TIMM13 E2F1 ROMO1 TIMM8A SFN
0.138229	8	124	2.81206	DNA geometric change	http://amigo.geneontology.org/amigo/term/GO:0032392	RFC2 POLQ CHTF18 DDB2 BRIP1 RECQL4 BLM UBA52
0.138882	18	416	1.88598	Sulfur compound metabolic process	http://amigo.geneontology.org/amigo/term/GO:0006790	XYLT2 CPS1 GSTP1 PHGDH ACOT7 GSTZ1 GSS ABCD1 B4GALT2 TST NUDT7 PTGES2 GSTO1 MVD BOLA2B CSPG4 B3GNT3 SLC25A10
0.138882	11	205	2.33881	Negative regulation of canonical Wnt signaling pathway	http://amigo.geneontology.org/amigo/term/GO:0090090	DKK3 GLI1 MAD2L2 SEM1 PSMB7 PSMB6 SOX17 PSMC3 IGFBP6 PSMD1 PSMD13
0.140592	4	35	4.98137	Ribonucleoside monophosphate biosynthetic process	http://amigo.geneontology.org/amigo/term/GO:0009156	LHPP ATIC NUDT2 APRT
0.140592	4	35	4.98137	Positive regulation of interleukin-2 production	http://amigo.geneontology.org/amigo/term/GO:0032743	PRKCQ TRAF2 RPS3 STOML2
0.140592	4	35	4.98137	Negative regulation of double-strand break repair	http://amigo.geneontology.org/amigo/term/GO:2000780	POLQ MAD2L2 RMI2 PARPBP
0.145639	24	615	1.70096	Cellular component disassembly	http://amigo.geneontology.org/amigo/term/GO:0022411	MRPS34 MRPL28 TPX2 SH3BP1 TSPO MRPL37 MRPS15 VAMP8 MRPS2 OPTN NFE2 KIF2C CCNB2 MRPL17 APEH CDK1 SPTBN2 MRPL11 BOK MRPL14 CIB1 KIF24 MRPL21 MRPL12
0.148289	7	101	3.02088	Regulation of cellular amine metabolic process	http://amigo.geneontology.org/amigo/term/GO:0033238	OAZ1 SEM1 PSMB7 PSMB6 PSMC3 PSMD1 PSMD13
0.151546	40	1178	1.48003	Cellular lipid metabolic process	http://amigo.geneontology.org/amigo/term/GO:0044255	MLXIPL LYPLA2 CPS1 MSMO1 HSD17B10 GSTP1 ACOT7 MCAT PNPLA3 GSTZ1 TRIB3 PIGU ABCD1 LMF1 ETFB SDC1 LRAT EDN2 ECHS1 ALDH3B2 HADH CYP1A1 NUDT7 THNSL2 ABCA12 PTGES2 AKR1C2 ACOXL LIPH STOML2 PIP5KL1 MVD ECI1 AGPAT2 FABP4 SPHK1 CPNE7 PGP AKR1C1 STARD10
0.153521	6	78	3.35285	Mitotic spindle assembly	http://amigo.geneontology.org/amigo/term/GO:0090307	TPX2 MISP MYBL2 KIF3B CDC20 AURKB
0.154448	34	965	1.53571	Cytokine-mediated signaling pathway	http://amigo.geneontology.org/amigo/term/GO:0019221	CRLF1 IL32 CAMK2B GSTP1 RPLP0 BIRC5 CCL22 SDC1 MT2A EDN2 TRAF2 SEM1 TXNDC17 BST2 PSMB7 PSMB6 LCN2 GSTO1 IL17RE PSMC3 BOLA2B AGPAT2 ISG20 PSMD1 SPHK1 TRAIP CIB1 PSMD13 IFITM1 TNFRSF18 ISG15 UBA52 IKBKE CD24
0.161866	6	79	3.3104	Animal organ regeneration	http://amigo.geneontology.org/amigo/term/GO:0031100	GSTP1 GLI1 RPS15 FPGS ATIC CDK1
0.163344	2	7	12.4534	Guanine nucleotide transport	http://amigo.geneontology.org/amigo/term/GO:0001408	LRRC8E SLC19A1
0.163344	5	57	3.82342	Sister chromatid cohesion	http://amigo.geneontology.org/amigo/term/GO:0007062	SMC1B KIF22 CDC20 CDCA5 HASPIN
0.163344	2	7	12.4534	Response to herbicide	http://amigo.geneontology.org/amigo/term/GO:0009635	CYP1A1 LCN2
0.163344	5	57	3.82342	Response to zinc ion	http://amigo.geneontology.org/amigo/term/GO:0010043	CPS1 TSPO MT2A KRT14 MT1X
0.163344	2	7	12.4534	Succinate transport	http://amigo.geneontology.org/amigo/term/GO:0015744	SLC13A3 SLC25A10
0.163344	4	37	4.71211	Triglyceride catabolic process	http://amigo.geneontology.org/amigo/term/GO:0019433	CPS1 PNPLA3 LIPH FABP4
0.163344	6	80	3.26902	Tetrapyrrole metabolic process	http://amigo.geneontology.org/amigo/term/GO:0033013	RFC2 BLVRB TSPO MMAB CYP1A1 UROS
0.163344	41	1222	1.46241	Regulation of organelle organization	http://amigo.geneontology.org/amigo/term/GO:0033043	ERCC1 TACC3 TMSB10 PRKCQ TPX2 EZR SH3BP1 BIK TSPO ZMYND8 E2F1 CAV2 SDC1 MAD2L2 CDC20 ARHGAP40 MAP2K2 BST2 NABP2 CDCA5 MKI67 RPS3 CDC42EP2 LMNA PTTG1 SKA3 CENPV CDT1 RHOD SPTBN2 PARL RMI2 SFN SPHK1 BOK AURKB TACSTD2 CIB1 MYO1C INF2 ARL2
0.163344	2	7	12.4534	Cellular response to erythropoietin	http://amigo.geneontology.org/amigo/term/GO:0036018	MT2A MT1X
0.163344	15	332	1.96929	Positive regulation of cell cycle	http://amigo.geneontology.org/amigo/term/GO:0045787	KIF3B GLI1 CIT RPS15A CYP1A1 DTL CDCA5 CENPV CDT1 CDK1 CKS1B FOSL1 SPHK1 AURKB RAD51B
0.163344	2	7	12.4534	Tetrahydrofolate biosynthetic process	http://amigo.geneontology.org/amigo/term/GO:0046654	MTHFD1L ATIC
0.163344	3	20	6.53805	Folic acid metabolic process	http://amigo.geneontology.org/amigo/term/GO:0046655	MTHFD1L FPGS SLC19A1
0.163344	3	20	6.53805	Negative regulation of ubiquitin-protein transferase activity	http://amigo.geneontology.org/amigo/term/GO:0051444	RPS20 RPS15 MAD2L2
0.163344	3	20	6.53805	Regulation of mitochondrial depolarization	http://amigo.geneontology.org/amigo/term/GO:0051900	TSPO ABCD1 BOK
0.163344	25	657	1.65856	Nucleobase-containing small molecule metabolic process	http://amigo.geneontology.org/amigo/term/GO:0055086	MLXIPL CPS1 NTHL1 NANS ACOT7 ATP5F1D GSTZ1 ABCD1 LHPP GALK1 GMDS ATP5F1E NT5C MACROD1 NT5E ATIC AK7 NUDT7 NUDT2 STOML2 MVD TK1 RRM2 APRT NME1
0.163344	2	7	12.4534	Succinate transmembrane transport	http://amigo.geneontology.org/amigo/term/GO:0071422	SLC13A3 SLC25A10
0.166905	5	58	3.7575	Porphyrin-containing compound metabolic process	http://amigo.geneontology.org/amigo/term/GO:0006778	RFC2 BLVRB TSPO CYP1A1 UROS
0.166905	5	58	3.7575	Interstrand cross-link repair	http://amigo.geneontology.org/amigo/term/GO:0036297	ERCC1 NUCKS1 RPA3 FANCI UBA52
0.169233	4	38	4.58811	Mitotic spindle assembly checkpoint signaling	http://amigo.geneontology.org/amigo/term/GO:0007094	MAD2L2 CDC20 CDT1 AURKB
0.169233	4	38	4.58811	Attachment of spindle microtubules to kinetochore	http://amigo.geneontology.org/amigo/term/GO:0008608	KNL1 KIF2C CDT1 AURKB
0.169233	11	214	2.24045	NIK/NF-kappaB signaling	http://amigo.geneontology.org/amigo/term/GO:0038061	C20orf27 TRAF2 SEM1 PSMB7 PSMB6 RPS3 PSMC3 PSMD1 SPHK1 PSMD13 IKBKE
0.169233	16	366	1.90544	DNA conformation change	http://amigo.geneontology.org/amigo/term/GO:0071103	RFC2 POLQ CENPM CHTF18 DDB2 BRIP1 KNL1 CDCA5 CHAF1B RECQL4 CENPV CHAF1A CDK1 BLM CENPW UBA52
0.169233	4	38	4.58811	Spindle assembly checkpoint signaling	http://amigo.geneontology.org/amigo/term/GO:0071173	MAD2L2 CDC20 CDT1 AURKB
0.169233	4	38	4.58811	Mitotic spindle checkpoint signaling	http://amigo.geneontology.org/amigo/term/GO:0071174	MAD2L2 CDC20 CDT1 AURKB
0.169233	9	158	2.4828	Establishment of protein localization to mitochondrion	http://amigo.geneontology.org/amigo/term/GO:0072655	TIMM13 TSPO E2F1 ROMO1 TIMM17B TIMM8A TOMM40 PARL SFN
0.17179	11	215	2.23003	Meiotic cell cycle process	http://amigo.geneontology.org/amigo/term/GO:1903046	ERCC1 ASPM DMC1 CDC20 MND1 BRIP1 P3H4 CCNB2 PTTG1 RAD51B PSMD13
0.17179	7	106	2.87839	Negative regulation of protein modification by small protein conjugation or removal	http://amigo.geneontology.org/amigo/term/GO:1903321	RPS20 TSPO RPS15 MAD2L2 PRR7 RPS3 ISG15
0.173291	5	59	3.69381	Establishment of protein localization to mitochondrial membrane	http://amigo.geneontology.org/amigo/term/GO:0090151	TIMM13 E2F1 ROMO1 TIMM8A SFN
0.178131	4	39	4.47046	Replication fork processing	http://amigo.geneontology.org/amigo/term/GO:0031297	NUCKS1 ZGRF1 TRAIP BLM
0.178131	4	39	4.47046	Spindle checkpoint signaling	http://amigo.geneontology.org/amigo/term/GO:0031577	MAD2L2 CDC20 CDT1 AURKB
0.178131	14	307	1.98768	Regulation of RNA stability	http://amigo.geneontology.org/amigo/term/GO:0043487	IGF2BP2 E2F1 HSPB1 TRAF2 SEM1 LSM4 IGF2BP3 PSMB7 PSMB6 PSMC3 PSMD1 PSMD13 UBA52 IKBKE
0.178131	4	39	4.47046	Positive regulation of DNA replication	http://amigo.geneontology.org/amigo/term/GO:0045740	GLI1 STOML2 CDT1 CDK1
0.178131	13	276	2.05301	Meiotic cell cycle	http://amigo.geneontology.org/amigo/term/GO:0051321	ERCC1 ASPM SMC1B DMC1 CDC20 MND1 TUBGCP2 BRIP1 P3H4 CCNB2 PTTG1 RAD51B PSMD13
0.178131	7	107	2.85149	Hematopoietic stem cell differentiation	http://amigo.geneontology.org/amigo/term/GO:0060218	TCF15 SEM1 PSMB7 PSMB6 PSMC3 PSMD1 PSMD13
0.178131	46	1421	1.41098	Epithelium development	http://amigo.geneontology.org/amigo/term/GO:0060429	CRLF1 CPS1 AP2S1 PHGDH EZR SH3BP1 CNFN RASIP1 FKBP8 B9D1 EXPH5 GLI1 WNT5B SDC1 MTHFD1L TCF15 SEM1 TST KRT17 GRHL1 KRT7 WNT10A PSMB7 CYP1A1 PSMB6 ABCA12 AKR1C2 SOX17 PSMC3 CDK1 MGMT PSMD1 SFN ETV4 TMEM107 HES7 RAD51B COL18A1 TACSTD2 PKP3 PSMD13 KRT14 AKR1C1 WNT7B TGM2 CD24
0.178131	3	21	6.22671	Tertiary alcohol metabolic process	http://amigo.geneontology.org/amigo/term/GO:1902644	DKK3 AKR1C2 AKR1C1
0.178131	8	133	2.62177	Regulation of stem cell differentiation	http://amigo.geneontology.org/amigo/term/GO:2000736	TCF15 SEM1 PSMB7 PSMB6 PSMC3 PSMD1 TACSTD2 PSMD13
0.179755	6	83	3.15087	Nucleoside phosphate catabolic process	http://amigo.geneontology.org/amigo/term/GO:1901292	NTHL1 ACOT7 ABCD1 NT5C NT5E NUDT7
0.182504	17	403	1.83866	Regulation of DNA metabolic process	http://amigo.geneontology.org/amigo/term/GO:0051052	ERCC1 RFC2 POLQ PRKCQ NUCKS1 MAD2L2 CHTF18 NABP2 WRAP53 RPS3 LMNA CDT1 MGMT RMI2 AURKB PARPBP BLM
0.187787	2	8	10.8967	L-phenylalanine catabolic process	http://amigo.geneontology.org/amigo/term/GO:0006559	GSTZ1 FAH
0.187787	9	163	2.40664	Mitochondrial membrane organization	http://amigo.geneontology.org/amigo/term/GO:0007006	ATP5F1D TIMM13 E2F1 ATP5F1E ROMO1 TIMM8A CHCHD6 SFN BOK
0.187787	7	110	2.77372	Regulation of mitotic nuclear division	http://amigo.geneontology.org/amigo/term/GO:0007088	CAV2 MAD2L2 CDC20 MKI67 CDT1 SPHK1 AURKB
0.187787	5	61	3.5727	Metaphase/anaphase transition of mitotic cell cycle	http://amigo.geneontology.org/amigo/term/GO:0007091	TACC3 MAD2L2 CDC20 CDT1 AURKB
0.187787	6	84	3.11336	Nucleoside triphosphate biosynthetic process	http://amigo.geneontology.org/amigo/term/GO:0009142	ATP5F1D ATP5F1E AK7 NUDT2 STOML2 NME1
0.187787	2	8	10.8967	Purine ribonucleoside monophosphate catabolic process	http://amigo.geneontology.org/amigo/term/GO:0009169	NT5C NT5E
0.187787	2	8	10.8967	Response to sucrose	http://amigo.geneontology.org/amigo/term/GO:0009744	ERCC1 PNPLA3
0.187787	3	22	5.94368	Protein import into mitochondrial matrix	http://amigo.geneontology.org/amigo/term/GO:0030150	ROMO1 TIMM17B TOMM40
0.187787	2	8	10.8967	Establishment or maintenance of cytoskeleton polarity	http://amigo.geneontology.org/amigo/term/GO:0030952	KIF2C LMNA
0.187787	4	40	4.3587	Tetrapyrrole biosynthetic process	http://amigo.geneontology.org/amigo/term/GO:0033014	RFC2 TSPO MMAB UROS
0.187787	2	8	10.8967	Response to disaccharide	http://amigo.geneontology.org/amigo/term/GO:0034285	ERCC1 PNPLA3
0.187787	2	8	10.8967	Response to erythropoietin	http://amigo.geneontology.org/amigo/term/GO:0036017	MT2A MT1X
0.187787	2	8	10.8967	Positive regulation of cell migration by vascular endothelial growth factor signaling pathway	http://amigo.geneontology.org/amigo/term/GO:0038089	HSPB1 MYO1C
0.187787	4	40	4.3587	Pteridine-containing compound metabolic process	http://amigo.geneontology.org/amigo/term/GO:0042558	MTHFD1L FPGS ATIC SLC19A1
0.187787	4	40	4.3587	Negative regulation of mitotic metaphase/anaphase transition	http://amigo.geneontology.org/amigo/term/GO:0045841	MAD2L2 CDC20 CDT1 AURKB
0.187787	9	163	2.40664	Protein localization to mitochondrion	http://amigo.geneontology.org/amigo/term/GO:0070585	TIMM13 TSPO E2F1 ROMO1 TIMM17B TIMM8A TOMM40 PARL SFN
0.187787	3	22	5.94368	Error-free translesion synthesis	http://amigo.geneontology.org/amigo/term/GO:0070987	RFC2 RPA3 UBA52
0.187787	12	250	2.09218	Positive regulation of cell cycle process	http://amigo.geneontology.org/amigo/term/GO:0090068	KIF3B GLI1 CIT CYP1A1 DTL CDCA5 CENPV CDT1 CDK1 SPHK1 AURKB RAD51B
0.187787	2	8	10.8967	Meiotic spindle assembly	http://amigo.geneontology.org/amigo/term/GO:0090306	ASPM CCNB2
0.187787	7	110	2.77372	Regulation of hematopoietic progenitor cell differentiation	http://amigo.geneontology.org/amigo/term/GO:1901532	TCF15 SEM1 PSMB7 PSMB6 PSMC3 PSMD1 PSMD13
0.187787	2	8	10.8967	Erythrose 4-phosphate/phosphoenolpyruvate family amino acid catabolic process	http://amigo.geneontology.org/amigo/term/GO:1902222	GSTZ1 FAH
0.192627	8	137	2.54523	Microtubule polymerization or depolymerization	http://amigo.geneontology.org/amigo/term/GO:0031109	TPX2 TUBGCP2 KIF2C RPS3 SKA3 CIB1 KIF24 ARL2
0.192678	25	677	1.60956	Cell surface receptor signaling pathway involved in cell-cell signaling	http://amigo.geneontology.org/amigo/term/GO:1905114	AP2S1 DKK3 ASPM ZMYND8 GLI1 WNT5B SDC1 MAD2L2 SEM1 WNT10A PSMB7 PSMB6 WNT9A SHANK2 SOX17 PSMC3 IGFBP6 PSMD1 FOXL1 PSMD13 TRABD2A WNT7B APCDD1L UBA52 CD24
0.196335	6	86	3.04095	Pyrimidine-containing compound metabolic process	http://amigo.geneontology.org/amigo/term/GO:0072527	CPS1 NTHL1 NT5C NT5E TK1 NME1
0.198382	15	346	1.88961	ATP metabolic process	http://amigo.geneontology.org/amigo/term/GO:0046034	MLXIPL UQCRC1 ATP5F1D TSPO ABCD1 GALK1 NDUFS8 ATP5F1E COX6B1 NDUFB9 COX6B2 NUDT2 STOML2 NDUFB8 CDK1

## Sheet: 6 Downreg Cellular Component
Gene Ontology showing enrichment of cellular component of downregulated differentially expressed genes (DEGs) common to 2 or more patients after 8-day in the perfusion device, treated with 1 µM GSK3368715 vs the DMSO control
Enrichment FDR	nGenes	Pathway Genes	Fold Enrichment	Pathway	URL	Genes
2.8562e-35	42	123	14.8834	Cytosolic ribosome	http://amigo.geneontology.org/amigo/term/GO:0022626	RPS20 RPL18 RPS5 RPLP0 RPL3 RPS19 RPL18A RPL28 RPS12 RPL24 RPS15 RPL21 RPS4Y1 RPL36 RPL27 RPS15A RPL35 RPS6 RPLP1 RPS24 RPS11 RPL13A RPL32 RPS3A RPS3 RPL8 RPL29 RPL9 RPL39L RPS14 RPL36AL RPL27A RPL13 RPSA RPS21 RPL38 RPL4 RPLP2 ISG15 RPL12 RPS29 UBA52
2.8562e-35	52	218	10.3969	Ribosomal subunit	http://amigo.geneontology.org/amigo/term/GO:0044391	RPS20 RPL18 MRPS34 RPS5 MRPL28 RPLP0 RPL3 RPS19 RPL18A RPL28 RPS12 RPL24 RPS15 MRPL37 MRPS15 RPL21 MRPS2 RPS4Y1 RPL36 RPL27 RPS15A RPL35 RPS6 RPLP1 RPS24 RPS11 RPL13A RPL32 RPS3A RPS3 MRPL17 RPL8 RPL29 RPL9 RPL39L RPS14 RPL36AL RPL27A RPL13 RPSA RPS21 RPL38 RPL4 MRPL11 RPLP2 MRPL14 ISG15 MRPL21 RPL12 RPS29 UBA52 MRPL12
7.95975e-30	53	291	7.93853	Ribosome	http://amigo.geneontology.org/amigo/term/GO:0005840	RPS20 RPL18 MRPS34 RPS5 MRPL28 RPLP0 RPL3 RPS19 RPL18A RPL28 RPS12 RPL24 RPS15 MRPL37 MRPS15 RPL21 MRPS2 RPS4Y1 RPL36 RPL27 RPS15A RPL35 RPS6 RPLP1 RPS24 RPS11 RPL13A RPL32 RPS3A RPS3 MRPL17 RPL8 RPL29 RPL22L1 RPL9 RPL39L RPS14 RPL36AL RPL27A RPL13 RPSA RPS21 RPL38 RPL4 MRPL11 RPLP2 MRPL14 ISG15 MRPL21 RPL12 RPS29 UBA52 MRPL12
7.7729e-24	25	58	18.7875	Cytosolic large ribosomal subunit	http://amigo.geneontology.org/amigo/term/GO:0022625	RPL18 RPLP0 RPL3 RPL18A RPL28 RPL24 RPL21 RPL36 RPL27 RPL35 RPLP1 RPL13A RPL32 RPL8 RPL29 RPL9 RPL39L RPL36AL RPL27A RPL13 RPL38 RPL4 RPLP2 RPL12 UBA52
6.20628e-23	32	122	11.4327	Large ribosomal subunit	http://amigo.geneontology.org/amigo/term/GO:0015934	RPL18 MRPL28 RPLP0 RPL3 RPL18A RPL28 RPL24 MRPL37 RPL21 RPL36 RPL27 RPL35 RPLP1 RPL13A RPL32 MRPL17 RPL8 RPL29 RPL9 RPL39L RPL36AL RPL27A RPL13 RPL38 RPL4 MRPL11 RPLP2 MRPL14 MRPL21 RPL12 UBA52 MRPL12
9.21982e-18	66	792	3.63225	Ribonucleoprotein complex	http://amigo.geneontology.org/amigo/term/GO:1990904	RPS20 RPL18 HSD17B10 MRPS34 SNRPA RPS5 MRPL28 RPLP0 RPL3 RPS19 RPL18A RPL28 RPS12 RPL24 RPS15 MRPL37 MRPS15 RPL21 MRPS2 SNRPD2 EMG1 RPS4Y1 RPL36 LSM4 RPL27 CTNNBL1 RPS15A RPL35 RPS6 RPLP1 RPS24 WRAP53 RPS11 RPL13A RPL32 RPS3A RPS3 ERG MRPL17 FAM207A RPL8 RPL29 RPL9 RPL39L RPS14 RPL36AL RPL27A RPL13 RPSA RPS21 PPIH RPL38 RPL4 MRPL11 RPLP2 MRPL14 TBL3 PKP3 ISG15 RRP7A MRPL21 RPL12 RPS29 UBA52 PWP2 …
1.47622e-13	18	62	12.6543	Cytosolic small ribosomal subunit	http://amigo.geneontology.org/amigo/term/GO:0022627	RPS20 RPS5 RPS19 RPS12 RPS15 RPS4Y1 RPS15A RPS6 RPS24 RPS11 RPS3A RPS3 RPS14 RPSA RPS21 ISG15 RPS29 UBA52
7.32922e-13	21	100	9.15327	Small ribosomal subunit	http://amigo.geneontology.org/amigo/term/GO:0015935	RPS20 MRPS34 RPS5 RPS19 RPS12 RPS15 MRPS15 MRPS2 RPS4Y1 RPS15A RPS6 RPS24 RPS11 RPS3A RPS3 RPS14 RPSA RPS21 ISG15 RPS29 UBA52
2.15888e-07	36	512	3.06471	Mitochondrial matrix	http://amigo.geneontology.org/amigo/term/GO:0005759	CPS1 TFB1M HSD17B10 MRPS34 MRPL28 ATP5F1D MCAT GSTZ1 ETFB NDUFS8 MRPL37 MRPS15 MTHFD1L MRPS2 ATP5F1E PRDX5 ECHS1 TST FPGS HADH MMAB MDH2 RPS3 MRPL17 FDXR NUDT2 NDUFB8 ECI1 CDK1 MRPL11 MRPL14 TXNRD2 MRPL21 ATAD3A ARL2 MRPL12
3.30078e-06	32	471	2.96132	Focal adhesion	http://amigo.geneontology.org/amigo/term/GO:0005925	RPL18 SLC9A3R2 PVR RPS5 RPLP0 EZR MISP RPL3 RPS19 CAV2 HSPB1 RPS15 MAP2K2 RPL27 RPLP1 GRB7 RPS11 RPL13A RPS3A RPS3 RPL8 RPL9 RPS14 RPL38 CSPG4 RPL4 RPLP2 PARVB RPL12 TGM2 ARL2 RPS29
4.21266e-06	32	478	2.91796	Cell-substrate junction	http://amigo.geneontology.org/amigo/term/GO:0030055	RPL18 SLC9A3R2 PVR RPS5 RPLP0 EZR MISP RPL3 RPS19 CAV2 HSPB1 RPS15 MAP2K2 RPL27 RPLP1 GRB7 RPS11 RPL13A RPS3A RPS3 RPL8 RPL9 RPS14 RPL38 CSPG4 RPL4 RPLP2 PARVB RPL12 TGM2 ARL2 RPS29
7.88717e-06	46	872	2.29931	Mitochondrial envelope	http://amigo.geneontology.org/amigo/term/GO:0005740	UQCRC1 CPS1 MRPS34 MRPL28 ATP5F1D TIMM13 BIK TSPO ABCD1 FKBP8 NDUFS8 MRPL37 MRPS15 MRPS2 ATP5F1E ROMO1 COX6B1 TIMM17B TIMM8A TOMM40 RTN4IP1 FPGS CYP1A1 NDUFB9 RPS3 NRGN MRPL17 CHCHD6 COX6B2 FDXR STOML2 NDUFB8 THOP1 MRPL11 PARL BOK MRPL14 SLC25A10 PRELID2 MRPL21 ATAD3A ARL2 UBA52 NME1 MRPL12 IKBKE
1.03968e-05	76	1816	1.82413	Mitochondrion	http://amigo.geneontology.org/amigo/term/GO:0005739	UQCRC1 CPS1 TFB1M NTHL1 HSD17B10 MRPS34 GSTP1 MRPL28 ACOT7 ATP5F1D TIMM13 BIK MCAT TSPO GSTZ1 E2F1 ABCD1 ETFB FKBP8 NDUFS8 MRPL37 MRPS15 MTHFD1L MRPS2 ATP5F1E ROMO1 COX6B1 PRDX5 TIMM17B MAP2K2 TIMM8A ECHS1 TST TOMM40 RTN4IP1 TACO1 FPGS HADH MMAB CYP1A1 MDH2 NDUFB9 PTGES2 RPS3 NRGN MRPL17 CHCHD6 COX6B2 FDXR NUDT2 STOML2 NDUFB8 ALKBH3 ECI1 PUSL1 CDK1 THOP1 MRPL11 PARL SFN BOK C10orf67 MRPL14 SLC25A…
1.03968e-05	12	79	6.62081	Polysome	http://amigo.geneontology.org/amigo/term/GO:0005844	RPL18 RPL18A RPL24 RPS4Y1 RPL36 RPS6 RPL32 RPS3 RPL8 RPS21 RPL38 RPS29
1.12528e-05	34	558	2.65584	Mitochondrial inner membrane	http://amigo.geneontology.org/amigo/term/GO:0005743	UQCRC1 CPS1 MRPS34 MRPL28 ATP5F1D TIMM13 NDUFS8 MRPL37 MRPS15 MRPS2 ATP5F1E ROMO1 COX6B1 TIMM17B TIMM8A TOMM40 FPGS CYP1A1 NDUFB9 RPS3 MRPL17 CHCHD6 COX6B2 FDXR STOML2 NDUFB8 MRPL11 PARL BOK MRPL14 SLC25A10 MRPL21 ATAD3A MRPL12
1.14629e-05	9	41	9.56788	Polysomal ribosome	http://amigo.geneontology.org/amigo/term/GO:0042788	RPL18 RPL18A RPL24 RPL36 RPL32 RPL8 RPS21 RPL38 RPS29
1.8029e-05	43	822	2.2801	Mitochondrial membrane	http://amigo.geneontology.org/amigo/term/GO:0031966	UQCRC1 CPS1 MRPS34 MRPL28 ATP5F1D TIMM13 BIK TSPO ABCD1 FKBP8 NDUFS8 MRPL37 MRPS15 MRPS2 ATP5F1E ROMO1 COX6B1 TIMM17B TIMM8A TOMM40 RTN4IP1 FPGS CYP1A1 NDUFB9 RPS3 NRGN MRPL17 CHCHD6 COX6B2 FDXR STOML2 NDUFB8 MRPL11 PARL BOK MRPL14 SLC25A10 MRPL21 ATAD3A UBA52 NME1 MRPL12 IKBKE
8.53485e-05	22	305	3.14398	Mitochondrial protein-containing complex	http://amigo.geneontology.org/amigo/term/GO:0098798	UQCRC1 HSD17B10 MRPS34 MRPL28 ATP5F1D TIMM13 NDUFS8 MRPL37 MRPS15 MRPS2 ATP5F1E ROMO1 TIMM17B TOMM40 NDUFB9 MRPL17 CHCHD6 NDUFB8 MRPL11 MRPL14 MRPL21 MRPL12
0.000120826	34	627	2.36357	Organelle inner membrane	http://amigo.geneontology.org/amigo/term/GO:0019866	UQCRC1 CPS1 MRPS34 MRPL28 ATP5F1D TIMM13 NDUFS8 MRPL37 MRPS15 MRPS2 ATP5F1E ROMO1 COX6B1 TIMM17B TIMM8A TOMM40 FPGS CYP1A1 NDUFB9 RPS3 MRPL17 CHCHD6 COX6B2 FDXR STOML2 NDUFB8 MRPL11 PARL BOK MRPL14 SLC25A10 MRPL21 ATAD3A MRPL12
0.000246299	58	1391	1.81743	Microtubule cytoskeleton	http://amigo.geneontology.org/amigo/term/GO:0015630	TACC3 EHD2 CNTLN CAMK2B PRKCQ ASPM WDR62 KIF22 TPX2 BIRC5 EZR CDC45 MISP RANGAP1 KIF3B E2F1 KLC3 HSPB1 B9D1 MAD2L2 CDC20 TTLL5 FAM110A DYNLRB1 MAP2K2 TUBA4A TUBGCP2 CTNNBL1 CCNJL KIF12 CEP55 MVB12A KIF2C DTL RPS3 CDC42EP2 MZT2B TBC1D31 CCNB2 TEDC2 POC1A SKA3 CENPV PCLAF DCXR CDK1 SHCBP1 SNCG HASPIN AURKB CEP57L1 CIB1 TEDC1 DNAH14 KIF24 FANK1 ARL2 NME1
0.000290675	34	658	2.25222	Centrosome	http://amigo.geneontology.org/amigo/term/GO:0005813	TACC3 CNTLN PRKCQ ASPM WDR62 CDC45 MISP KIF3B E2F1 B9D1 CDC20 TTLL5 DYNLRB1 TUBGCP2 CTNNBL1 CCNJL CEP55 MVB12A KIF2C DTL MZT2B TBC1D31 CCNB2 POC1A SKA3 PCLAF CDK1 SNCG HASPIN AURKB CEP57L1 CIB1 ARL2 NME1
0.000290675	25	410	2.65774	Spindle	http://amigo.geneontology.org/amigo/term/GO:0005819	TACC3 ASPM WDR62 KIF22 TPX2 BIRC5 MISP RANGAP1 KIF3B HSPB1 MAD2L2 CDC20 FAM110A TUBGCP2 KIF2C RPS3 MZT2B POC1A SKA3 CENPV CDK1 SHCBP1 SNCG HASPIN AURKB
0.000301264	41	868	2.05883	Microtubule organizing center	http://amigo.geneontology.org/amigo/term/GO:0005815	TACC3 CNTLN CAMK2B PRKCQ ASPM WDR62 EZR CDC45 MISP KIF3B E2F1 B9D1 CDC20 TTLL5 FAM110A DYNLRB1 TUBGCP2 CTNNBL1 CCNJL CEP55 MVB12A KIF2C DTL MZT2B TBC1D31 CCNB2 TEDC2 POC1A SKA3 PCLAF CDK1 SNCG HASPIN AURKB CEP57L1 CIB1 TEDC1 KIF24 FANK1 ARL2 NME1
0.000345358	56	1352	1.80538	Organelle envelope	http://amigo.geneontology.org/amigo/term/GO:0031967	UQCRC1 CPS1 MRPS34 MRPL28 ATP5F1D TIMM13 BIK TSPO RANGAP1 ABCD1 FKBP8 NDUFS8 MRPL37 MRPS15 MRPS2 ATP5F1E ROMO1 COX6B1 TIMM17B TIMM8A TOMM40 RTN4IP1 BRIP1 FPGS CYP1A1 TMC6 DTL EBP NDUFB9 RPS3 NRGN MRPL17 CHCHD6 COX6B2 LMNA FDXR APEH STOML2 NDUFB8 CENPV THOP1 MRPL11 PARL BOK MRPL14 SLC25A10 PRELID2 JPT1 MRPL21 ATAD3A MYO1C ARL2 UBA52 NME1 MRPL12 IKBKE
0.000345358	56	1352	1.80538	Envelope	http://amigo.geneontology.org/amigo/term/GO:0031975	UQCRC1 CPS1 MRPS34 MRPL28 ATP5F1D TIMM13 BIK TSPO RANGAP1 ABCD1 FKBP8 NDUFS8 MRPL37 MRPS15 MRPS2 ATP5F1E ROMO1 COX6B1 TIMM17B TIMM8A TOMM40 RTN4IP1 BRIP1 FPGS CYP1A1 TMC6 DTL EBP NDUFB9 RPS3 NRGN MRPL17 CHCHD6 COX6B2 LMNA FDXR APEH STOML2 NDUFB8 CENPV THOP1 MRPL11 PARL BOK MRPL14 SLC25A10 PRELID2 JPT1 MRPL21 ATAD3A MYO1C ARL2 UBA52 NME1 MRPL12 IKBKE
0.00131493	17	245	3.0244	Condensed chromosome	http://amigo.geneontology.org/amigo/term/GO:0000793	SMC1B KIF22 BIRC5 CENPM DMC1 RANGAP1 KNL1 P3H4 KIF2C MKI67 SPC24 SKA3 CENPV CDT1 AURKB BLM CENPW
0.00151506	40	907	1.92225	Anchoring junction	http://amigo.geneontology.org/amigo/term/GO:0070161	RPL18 SLC9A3R2 PVR RPS5 FAT2 RPLP0 EZR MISP SH3BP1 RPL3 RPS19 RASIP1 CAV2 HSPB1 CDCA3 RPS15 MAP2K2 PDLIM4 RPL27 RPLP1 GRB7 RPS11 RPL13A RPS3A RPS3 PCDH1 RPL8 RPL9 RPS14 RPL38 CSPG4 RPL4 RPLP2 PKP3 PARVB RPL12 TGM2 ARL2 RPS29 STARD10
0.00169762	12	137	3.81784	Kinetochore	http://amigo.geneontology.org/amigo/term/GO:0000776	KIF22 BIRC5 CENPM RANGAP1 KNL1 KIF2C SPC24 SKA3 CENPV CDT1 AURKB CENPW
0.00173993	10	98	4.44765	Organellar ribosome	http://amigo.geneontology.org/amigo/term/GO:0000313	MRPS34 MRPL28 MRPL37 MRPS15 MRPS2 MRPL17 MRPL11 MRPL14 MRPL21 MRPL12
0.00173993	10	98	4.44765	Mitochondrial ribosome	http://amigo.geneontology.org/amigo/term/GO:0005761	MRPS34 MRPL28 MRPL37 MRPS15 MRPS2 MRPL17 MRPL11 MRPL14 MRPL21 MRPL12
0.00320698	12	148	3.53408	Condensed chromosome, centromeric region	http://amigo.geneontology.org/amigo/term/GO:0000779	KIF22 BIRC5 CENPM RANGAP1 KNL1 KIF2C SPC24 SKA3 CENPV CDT1 AURKB CENPW
0.00356519	21	377	2.42792	Chromosomal region	http://amigo.geneontology.org/amigo/term/GO:0098687	ERCC1 SMC1B KIF22 BIRC5 CENPM DMC1 RANGAP1 KNL1 NABP2 WRAP53 KIF2C CDCA5 RECQL4 SPC24 SKA3 CENPV CDT1 CDK1 AURKB BLM CENPW
0.00683316	7	59	5.17134	Organellar large ribosomal subunit	http://amigo.geneontology.org/amigo/term/GO:0000315	MRPL28 MRPL37 MRPL17 MRPL11 MRPL14 MRPL21 MRPL12
0.00683316	14	210	2.9058	Chromosome, centromeric region	http://amigo.geneontology.org/amigo/term/GO:0000775	SMC1B KIF22 BIRC5 CENPM RANGAP1 KNL1 KIF2C CDCA5 SPC24 SKA3 CENPV CDT1 AURKB CENPW
0.00683316	7	59	5.17134	Mitochondrial large ribosomal subunit	http://amigo.geneontology.org/amigo/term/GO:0005762	MRPL28 MRPL37 MRPL17 MRPL11 MRPL14 MRPL21 MRPL12
0.00849224	42	1067	1.7157	Nucleolus	http://amigo.geneontology.org/amigo/term/GO:0005730	REXO5 CPS1 RPL18 NUCKS1 TCOF1 EZR TIMM13 RPL3 RPS19 MAD2L2 MRPS15 EMG1 RPL36 RPL27 RPL35 RPS6 P3H4 RPS11 RPL13A DTL RPS3A MKI67 RPS3 PCDH1 FAM207A MED27 SPC24 RPS14 RPL13 ISG20 RPL4 ETV4 TBL3 TRAIP JPT1 RRP7A BLM MYO1C CENPW ARL2 CDKN2AIPNL PWP2
0.0155119	8	88	3.96245	Rough endoplasmic reticulum	http://amigo.geneontology.org/amigo/term/GO:0005791	RPL18 LRAT F12 RPL27 SFTPD RPS21 RPL4 RPS29
0.0188145	8	91	3.83182	Endopeptidase complex	http://amigo.geneontology.org/amigo/term/GO:1905369	PIGU HSPB1 SEM1 PSMB7 PSMB6 PSMC3 PSMD1 PSMD13
0.0243564	2	3	29.058	CAF-1 complex	http://amigo.geneontology.org/amigo/term/GO:0033186	CHAF1B CHAF1A
0.0260049	4	23	7.58035	Proteasome regulatory particle	http://amigo.geneontology.org/amigo/term/GO:0005838	SEM1 PSMC3 PSMD1 PSMD13
0.0260049	51	1455	1.52779	Supramolecular complex	http://amigo.geneontology.org/amigo/term/GO:0099080	ASPM KIF22 TPX2 FKBP1A RPLP0 BIRC5 EZR MISP CENPM RANGAP1 MYL9 KIF3B MYOM1 KLC3 TNNT1 HSPB1 RPL28 COL7A1 TTLL5 DYNLRB1 MAP2K2 TUBA4A KRT17 LSM4 TUBGCP2 PDLIM4 KRT7 KIF12 RPS6 KNL1 GRB7 KIF2C LMNA SPC24 SHANK2 SKA3 PSMC3 CENPV CDT1 DCXR CDK1 AURKB CEP57L1 DNAH14 KIF24 KRT14 PARVB MYO1C RCSD1 CENPW NME1
0.0380122	21	464	1.97269	Microtubule	http://amigo.geneontology.org/amigo/term/GO:0005874	ASPM KIF22 TPX2 BIRC5 MISP KIF3B KLC3 TTLL5 DYNLRB1 MAP2K2 TUBA4A TUBGCP2 KIF12 KIF2C SKA3 DCXR CDK1 AURKB CEP57L1 DNAH14 KIF24
0.0435094	2	4	21.7935	Mitochondrial proton-transporting ATP synthase complex, catalytic sector F(1)	http://amigo.geneontology.org/amigo/term/GO:0000275	ATP5F1D ATP5F1E
0.0472551	7	85	3.58952	Proteasome complex	http://amigo.geneontology.org/amigo/term/GO:0000502	HSPB1 SEM1 PSMB7 PSMB6 PSMC3 PSMD1 PSMD13
0.0492629	4	28	6.22671	Proteasome accessory complex	http://amigo.geneontology.org/amigo/term/GO:0022624	SEM1 PSMC3 PSMD1 PSMD13
0.0667575	2	5	17.4348	Cul4B-RING E3 ubiquitin ligase complex	http://amigo.geneontology.org/amigo/term/GO:0031465	DDB2 DTL
0.0693521	8	116	3.006	Peptidase complex	http://amigo.geneontology.org/amigo/term/GO:1905368	PIGU HSPB1 SEM1 PSMB7 PSMB6 PSMC3 PSMD1 PSMD13
0.073932	61	1918	1.38624	Chromosome	http://amigo.geneontology.org/amigo/term/GO:0005694	MLXIPL ERCC1 POLA2 RFC2 POLQ NUCKS1 HES2 SMC1B KIF22 BIRC5 CENPM DMC1 RANGAP1 E2F1 DBP RPA3 MAD2L2 NFE2 TCF15 EMG1 CHTF18 NPAS1 GINS2 GRHL1 NKX2-8 KNL1 NABP2 WRAP53 P3H4 KIF2C DTL CDCA5 MKI67 ERG CHAF1B LMNA RECQL4 SPC24 SOX17 SKA3 CENPV CDT1 CHAF1A CDK1 BRMS1 FOSL1 ETV4 FOXL1 HASPIN AURKB HES7 RAD51B ASCL2 TRAIP PARPBP BLM HMGN5 BAZ1A TGM2 CENPW FANK1
0.073932	4	32	5.44837	90S preribosome	http://amigo.geneontology.org/amigo/term/GO:0030686	FAM207A TBL3 RRP7A PWP2
0.0755029	6	72	3.63225	Spindle microtubule	http://amigo.geneontology.org/amigo/term/GO:0005876	BIRC5 MISP KIF3B SKA3 CDK1 AURKB
0.0782525	10	172	2.53413	Spindle pole	http://amigo.geneontology.org/amigo/term/GO:0000922	TACC3 ASPM WDR62 TPX2 MISP CDC20 FAM110A TUBGCP2 POC1A AURKB
0.0855939	2	6	14.529	Chromosome passenger complex	http://amigo.geneontology.org/amigo/term/GO:0032133	BIRC5 AURKB
0.0855939	2	6	14.529	Cytoplasmic side of rough endoplasmic reticulum membrane	http://amigo.geneontology.org/amigo/term/GO:0098556	RPL27 RPS29
0.0863746	10	176	2.47653	Mitotic spindle	http://amigo.geneontology.org/amigo/term/GO:0072686	TACC3 ASPM KIF22 TPX2 MISP RANGAP1 RPS3 SKA3 CDK1 AURKB
0.0964145	31	856	1.5785	Polymeric cytoskeletal fiber	http://amigo.geneontology.org/amigo/term/GO:0099513	ASPM KIF22 TPX2 BIRC5 EZR MISP KIF3B KLC3 TTLL5 DYNLRB1 MAP2K2 TUBA4A KRT17 TUBGCP2 PDLIM4 KRT7 KIF12 KIF2C LMNA SHANK2 SKA3 DCXR CDK1 AURKB CEP57L1 DNAH14 KIF24 KRT14 MYO1C RCSD1 NME1
0.107118	5	57	3.82342	Kinesin complex	http://amigo.geneontology.org/amigo/term/GO:0005871	KIF22 KIF3B KLC3 KIF12 KIF2C
0.109737	2	7	12.4534	Proton-transporting ATP synthase complex, catalytic core F(1)	http://amigo.geneontology.org/amigo/term/GO:0045261	ATP5F1D ATP5F1E
0.139223	2	8	10.8967	Proteasome regulatory particle, lid subcomplex	http://amigo.geneontology.org/amigo/term/GO:0008541	SEM1 PSMD13
0.139223	2	8	10.8967	Ctf18 RFC-like complex	http://amigo.geneontology.org/amigo/term/GO:0031390	RFC2 CHTF18
0.139436	37	1102	1.46345	Supramolecular fiber	http://amigo.geneontology.org/amigo/term/GO:0099512	ASPM KIF22 TPX2 FKBP1A BIRC5 EZR MISP MYL9 KIF3B MYOM1 KLC3 TNNT1 HSPB1 TTLL5 DYNLRB1 MAP2K2 TUBA4A KRT17 TUBGCP2 PDLIM4 KRT7 KIF12 KIF2C LMNA SHANK2 SKA3 DCXR CDK1 AURKB CEP57L1 DNAH14 KIF24 KRT14 PARVB MYO1C RCSD1 NME1
0.151955	37	1110	1.4529	Supramolecular polymer	http://amigo.geneontology.org/amigo/term/GO:0099081	ASPM KIF22 TPX2 FKBP1A BIRC5 EZR MISP MYL9 KIF3B MYOM1 KLC3 TNNT1 HSPB1 TTLL5 DYNLRB1 MAP2K2 TUBA4A KRT17 TUBGCP2 PDLIM4 KRT7 KIF12 KIF2C LMNA SHANK2 SKA3 DCXR CDK1 AURKB CEP57L1 DNAH14 KIF24 KRT14 PARVB MYO1C RCSD1 NME1
0.155491	9	168	2.33502	Inner mitochondrial membrane protein complex	http://amigo.geneontology.org/amigo/term/GO:0098800	UQCRC1 ATP5F1D NDUFS8 ATP5F1E ROMO1 TIMM17B NDUFB9 CHCHD6 NDUFB8
0.161375	6	89	2.93845	Mitochondrial intermembrane space	http://amigo.geneontology.org/amigo/term/GO:0005758	TIMM13 TIMM8A STOML2 THOP1 PRELID2 ARL2
0.162445	3	24	5.44837	Anaphase-promoting complex	http://amigo.geneontology.org/amigo/term/GO:0005680	UBE2S MAD2L2 CDC20
0.16457	9	171	2.29405	Microtubule associated complex	http://amigo.geneontology.org/amigo/term/GO:0005875	KIF22 BIRC5 KIF3B KLC3 DYNLRB1 KIF12 KIF2C AURKB DNAH14
0.167169	4	44	3.96245	Cyclin-dependent protein kinase holoenzyme complex	http://amigo.geneontology.org/amigo/term/GO:0000307	CCNJL CCNB2 CDK1 CKS1B
0.171646	5	67	3.25276	Replication fork	http://amigo.geneontology.org/amigo/term/GO:0005657	POLA2 RFC2 RPA3 RAD51B BLM
0.178076	10	204	2.13662	Cytoplasmic side of membrane	http://amigo.geneontology.org/amigo/term/GO:0098562	FKBP1A EZR CAV2 SRMS MAP2K2 TRAF2 GNG11 RPL27 GNB1L RPS29
0.193575	4	47	3.70953	Nucleoid	http://amigo.geneontology.org/amigo/term/GO:0009295	CPS1 TFB1M HSD17B10 ATAD3A
0.193575	4	47	3.70953	Mitochondrial nucleoid	http://amigo.geneontology.org/amigo/term/GO:0042645	CPS1 TFB1M HSD17B10 ATAD3A
0.193575	6	95	2.75286	Site of DNA damage	http://amigo.geneontology.org/amigo/term/GO:0090734	RPA3 MAD2L2 NABP2 WRAP53 LMNA TRAIP

## Sheet: 7 Downreg Molecular Function
Gene Ontology showing enrichment of Molecular Function of downregulated differentially expressed genes (DEGs) common to 2 or more patients after 8-day in the perfusion device, treated with 1 µM GSK3368715 vs the DMSO control
Enrichment FDR	nGenes	Pathway Genes	Fold Enrichment	Pathway	URL	Genes
9.77809e-37	52	201	11.2762	Structural constituent of ribosome	http://amigo.geneontology.org/amigo/term/GO:0003735	RPS20 RPL18 MRPS34 RPS5 MRPL28 RPLP0 RPL3 RPS19 RPL18A RPL28 RPS12 RPL24 RPS15 MRPL37 MRPS15 RPL21 MRPS2 RPS4Y1 RPL36 RPL27 RPS15A RPL35 RPS6 RPLP1 RPS24 RPS11 RPL13A RPL32 RPS3A RPS3 MRPL17 RPL8 RPL29 RPL22L1 RPL9 RPL39L RPS14 RPL36AL RPL27A RPL13 RPSA RPS21 RPL38 RPL4 MRPL11 RPLP2 MRPL14 MRPL21 RPL12 RPS29 UBA52 MRPL12
2.47008e-17	66	784	3.66931	Structural molecule activity	http://amigo.geneontology.org/amigo/term/GO:0005198	RPS20 LAMC3 RPL18 MRPS34 RPS5 MRPL28 RPLP0 RPL3 MYL9 MYOM1 RPS19 RPL18A RPL28 RPS12 COL7A1 RPL24 RPS15 MRPL37 MRPS15 RPL21 MRPS2 TUBA4A KRT17 RPS4Y1 RPL36 RPL27 RPS15A RPL35 RPS6 RPLP1 RPS24 RPS11 RPL13A RPL32 RPS3A RPS3 MRPL17 LMNA RPL8 RPL29 RPL22L1 RPL9 RPL39L RPS14 RPL36AL RPL27A RPL13 RPSA RPS21 RPL38 MMRN2 SPTBN2 RPL4 MRPL11 CLTB RPLP2 MRPL14 COL18A1 PSMD13 KRT14 ZP3 MRPL21 RPL12 RPS29 UBA5…
3.02451e-06	82	1873	1.90824	RNA binding	http://amigo.geneontology.org/amigo/term/GO:0003723	REXO5 RPS20 TFB1M RPL18 NUCKS1 TCOF1 HSD17B10 IGF2BP2 SNRPA RPS5 MRPL28 RPLP0 EZR LGALS1 MCAT RPL3 RANGAP1 RPS19 RPL18A HSPB1 RPL28 RPS12 RPL24 RPS15 FARSB MRPL37 MRPS15 CPSF3 RPL21 SNRPD2 EMG1 TST RPS4Y1 RPL36 BST2 LSM4 RPL27 CLUH RPS15A IGF2BP3 TACO1 RPL35 RPS6 RPS24 ZGRF1 NUDT7 WRAP53 GRB7 RPS11 RPL13A RPL32 RPS3A C7orf50 MDH2 MKI67 RPS3 RPL8 FLYWCH2 RPL29 RPL22L1 RPL9 APEH RPS14 RPL27A RPL13 …
8.87339e-06	13	81	6.99544	RRNA binding	http://amigo.geneontology.org/amigo/term/GO:0019843	RPS5 RPLP0 EMG1 TST RPS4Y1 TACO1 RPS11 RPS3 RPL8 RPL9 RPS14 MRPL11 RPL12
0.0166063	14	183	3.33452	Carboxylic acid binding	http://amigo.geneontology.org/amigo/term/GO:0031406	CPS1 GSTP1 GSS P3H3 LRAT PRR7 THNSL2 AKR1C2 ACOXL ALKBH3 FABP4 SLC19A1 AKR1C1 UROS
0.0265982	8	69	5.05356	Damaged DNA binding	http://amigo.geneontology.org/amigo/term/GO:0003684	ERCC1 POLQ NTHL1 RPA3 DDB2 RPS3 RECQL4 BLM
0.0265982	63	1743	1.57543	Adenyl nucleotide binding	http://amigo.geneontology.org/amigo/term/GO:0030554	CPS1 EHD2 RFC2 POLQ CAMK2B PRKCQ MYO3B SMC1B KIF22 ACOT7 ATP5F1D DMC1 PNPLA3 GSS TRIB3 KIF3B ABCD1 PIM2 UBE2S GALK1 FARSB PTPA TTLL5 MTHFD1L SIL1 CIT SRMS MAP2K2 CHTF18 BRIP1 FPGS KIF12 MMAB AK7 KIF2C ABCA12 MKI67 TKFC UBE2Z RECQL4 STK32C PSMC3 PIP5KL1 MVD TK1 PBK CDK1 RBKS SLC19A1 SPHK1 HASPIN AURKB RAD51B DNAH14 POMK KIF24 PRKAR1B BLM ATAD3A MYO1C APRT NME1 IKBKE
0.0265982	3	6	21.7935	Large ribosomal subunit rRNA binding	http://amigo.geneontology.org/amigo/term/GO:0070180	RPLP0 MRPL11 RPL12
0.032567	62	1730	1.56208	Adenyl ribonucleotide binding	http://amigo.geneontology.org/amigo/term/GO:0032559	CPS1 EHD2 RFC2 POLQ CAMK2B PRKCQ MYO3B SMC1B KIF22 ACOT7 ATP5F1D DMC1 PNPLA3 GSS TRIB3 KIF3B ABCD1 PIM2 UBE2S GALK1 FARSB PTPA TTLL5 MTHFD1L CIT SRMS MAP2K2 CHTF18 BRIP1 FPGS KIF12 MMAB AK7 KIF2C ABCA12 MKI67 TKFC UBE2Z RECQL4 STK32C PSMC3 PIP5KL1 MVD TK1 PBK CDK1 RBKS SLC19A1 SPHK1 HASPIN AURKB RAD51B DNAH14 POMK KIF24 PRKAR1B BLM ATAD3A MYO1C APRT NME1 IKBKE
0.0346478	15	235	2.78215	Catalytic activity, acting on DNA	http://amigo.geneontology.org/amigo/term/GO:0140097	ERCC1 RFC2 POLQ NTHL1 DMC1 CHTF18 BRIP1 ZGRF1 RPS3 RECQL4 MGMT ISG20 RAD51B BLM NME1
0.0355921	35	835	1.827	Oxidoreductase activity	http://amigo.geneontology.org/amigo/term/GO:0016491	UQCRC1 MSMO1 HSD17B10 GSTP1 BLVRB PHGDH GSTZ1 ETFB NDUFS8 P3H3 MTHFD1L COX6B1 PRDX5 TXNDC17 RTN4IP1 ALDH3B2 HADH CYP1A1 MDH2 NDUFB9 PTGES2 GSTO1 AKR1C2 ACOXL OXNAD1 FDXR ALDH16A1 NDUFB8 ALKBH3 CYB5R2 DCXR RRM2 HSD11B2 TXNRD2 AKR1C1
0.0355921	8	80	4.3587	Carbon-oxygen lyase activity	http://amigo.geneontology.org/amigo/term/GO:0016835	POLQ NTHL1 GMDS ECHS1 CYP1A1 RPS3 ECI1 UROS
0.0355921	14	213	2.86487	Protein kinase regulator activity	http://amigo.geneontology.org/amigo/term/GO:0019887	TPX2 TRIB3 HSPB1 CIT MAP2K2 CCNJL RPLP1 CCNB2 GPRC5C CKS1B SFN CIB1 PRKAR1B CD24
0.0399307	15	246	2.65774	Kinase regulator activity	http://amigo.geneontology.org/amigo/term/GO:0019207	GSTP1 TPX2 TRIB3 HSPB1 CIT MAP2K2 CCNJL RPLP1 CCNB2 GPRC5C CKS1B SFN CIB1 PRKAR1B CD24
0.0499298	10	130	3.35285	Single-stranded DNA binding	http://amigo.geneontology.org/amigo/term/GO:0003697	ERCC1 NUCKS1 CDC45 DMC1 RPA3 NABP2 RECQL4 RAD51B BLM NME1
0.0499298	3	9	14.529	Oxidized purine DNA binding	http://amigo.geneontology.org/amigo/term/GO:0032357	RPS3 RECQL4 BLM
0.0499298	3	9	14.529	Androstan-3-alpha,17-beta-diol dehydrogenase activity	http://amigo.geneontology.org/amigo/term/GO:0047044	HSD17B10 AKR1C2 AKR1C1
0.0556974	7	73	4.17958	Microtubule motor activity	http://amigo.geneontology.org/amigo/term/GO:0003777	KIF22 KIF3B DYNLRB1 KIF12 KIF2C DNAH14 KIF24
0.0556974	57	1662	1.49486	ATP binding	http://amigo.geneontology.org/amigo/term/GO:0005524	CPS1 EHD2 RFC2 POLQ CAMK2B PRKCQ MYO3B SMC1B KIF22 ATP5F1D DMC1 GSS TRIB3 KIF3B ABCD1 PIM2 UBE2S GALK1 FARSB PTPA TTLL5 MTHFD1L CIT SRMS MAP2K2 CHTF18 BRIP1 FPGS KIF12 MMAB AK7 KIF2C ABCA12 MKI67 TKFC UBE2Z RECQL4 STK32C PSMC3 PIP5KL1 MVD TK1 PBK CDK1 RBKS SPHK1 HASPIN AURKB RAD51B DNAH14 POMK KIF24 BLM ATAD3A MYO1C NME1 IKBKE
0.0556974	2	3	29.058	Protein kinase C inhibitor activity	http://amigo.geneontology.org/amigo/term/GO:0008426	HSPB1 SFN
0.0556974	2	3	29.058	Phenanthrene 9,10-monooxygenase activity	http://amigo.geneontology.org/amigo/term/GO:0018636	AKR1C2 AKR1C1
0.0556974	5	35	6.22671	Protein serine/threonine kinase inhibitor activity	http://amigo.geneontology.org/amigo/term/GO:0030291	HSPB1 CIT SFN CIB1 PRKAR1B
0.0556974	3	10	13.0761	Oxidized DNA binding	http://amigo.geneontology.org/amigo/term/GO:0032356	RPS3 RECQL4 BLM
0.0556974	7	74	4.12309	Monocarboxylic acid binding	http://amigo.geneontology.org/amigo/term/GO:0033293	GSTP1 LRAT PRR7 AKR1C2 ACOXL FABP4 AKR1C1
0.0556974	2	3	29.058	Trans-1,2-dihydrobenzene-1,2-diol dehydrogenase activity	http://amigo.geneontology.org/amigo/term/GO:0047115	AKR1C2 AKR1C1
0.0556974	2	3	29.058	Indanol dehydrogenase activity	http://amigo.geneontology.org/amigo/term/GO:0047718	AKR1C2 AKR1C1
0.0580324	6	56	4.67004	Cysteine-type endopeptidase inhibitor activity	http://amigo.geneontology.org/amigo/term/GO:0004869	BIRC5 WFDC2 PRDX5 UBE2Z PTTG1 CST6
0.0580324	4	23	7.58035	Ubiquitin-protein transferase regulator activity	http://amigo.geneontology.org/amigo/term/GO:0055106	RPS20 TRIB3 RPS15 CDC20
0.0601602	13	221	2.56394	Lyase activity	http://amigo.geneontology.org/amigo/term/GO:0016829	POLQ NTHL1 GMDS ECHS1 CYP1A1 THNSL2 PTGES2 RPS3 TKFC CENPV MVD ECI1 UROS
0.0705475	9	124	3.16357	Cytoskeletal motor activity	http://amigo.geneontology.org/amigo/term/GO:0003774	MYO3B KIF22 KIF3B DYNLRB1 KIF12 KIF2C DNAH14 KIF24 MYO1C
0.0864308	31	794	1.70176	Kinase binding	http://amigo.geneontology.org/amigo/term/GO:0019900	CNTLN GSTP1 TPX2 EZR TRIB3 E2F1 MYOM1 RPS19 CAV2 HSPB1 MAD2L2 CIT TRAF2 TUBA4A PRR7 FAM83F RPS6 GRB7 CBLC RPS3 CAVIN3 NRTN RHOD CKS1B CSPG4 SFN AURKB PER1 CIB1 PRKAR1B CD24
0.0864308	2	4	21.7935	L-malate dehydrogenase activity	http://amigo.geneontology.org/amigo/term/GO:0030060	PHGDH MDH2
0.0864308	2	4	21.7935	Telomeric D-loop binding	http://amigo.geneontology.org/amigo/term/GO:0061821	RECQL4 BLM
0.0867518	4	27	6.45733	MRNA 5 -UTR binding	http://amigo.geneontology.org/amigo/term/GO:0048027	IGF2BP2 IGF2BP3 RPS3A RPS14
0.109773	4	29	6.012	Dicarboxylic acid transmembrane transporter activity	http://amigo.geneontology.org/amigo/term/GO:0005310	SLC1A6 SLC13A3 SLC19A1 SLC25A10
0.109773	28	712	1.7141	Protein kinase binding	http://amigo.geneontology.org/amigo/term/GO:0019901	CNTLN GSTP1 TPX2 EZR TRIB3 E2F1 RPS19 CAV2 HSPB1 MAD2L2 CIT TRAF2 TUBA4A PRR7 FAM83F RPS6 GRB7 CBLC RPS3 CAVIN3 NRTN RHOD CKS1B CSPG4 SFN CIB1 PRKAR1B CD24
0.117924	4	30	5.8116	Oxidoreductase activity, acting on the CH-CH group of donors, NAD or NADP as acceptor	http://amigo.geneontology.org/amigo/term/GO:0016628	BLVRB PTGES2 AKR1C2 AKR1C1
0.117964	8	115	3.03214	ATP-dependent activity, acting on DNA	http://amigo.geneontology.org/amigo/term/GO:0008094	RFC2 POLQ DMC1 CHTF18 BRIP1 RECQL4 RAD51B BLM
0.117964	2	5	17.4348	Ketosteroid monooxygenase activity	http://amigo.geneontology.org/amigo/term/GO:0047086	AKR1C2 AKR1C1
0.117964	2	5	17.4348	D-loop DNA binding	http://amigo.geneontology.org/amigo/term/GO:0062037	RECQL4 BLM
0.119549	3	16	8.17256	C4-dicarboxylate transmembrane transporter activity	http://amigo.geneontology.org/amigo/term/GO:0015556	SLC1A6 SLC13A3 SLC25A10
0.119549	3	16	8.17256	Histone kinase activity	http://amigo.geneontology.org/amigo/term/GO:0035173	CDK1 HASPIN AURKB
0.122577	5	50	4.3587	Cis-trans isomerase activity	http://amigo.geneontology.org/amigo/term/GO:0016859	FKBP1A GSTZ1 FKBP8 PTPA PPIH
0.128431	14	283	2.15625	Protein-macromolecule adaptor activity	http://amigo.geneontology.org/amigo/term/GO:0030674	AP2S1 CNTLN SLC9A3R2 TCOF1 CAV2 MLPH VAMP8 OPTN MAP2K2 TRAF2 AP1M2 SHANK2 STAP2 CIB1
0.144081	6	74	3.53408	Protein kinase inhibitor activity	http://amigo.geneontology.org/amigo/term/GO:0004860	TRIB3 HSPB1 CIT SFN CIB1 PRKAR1B
0.144081	2	6	14.529	Four-way junction helicase activity	http://amigo.geneontology.org/amigo/term/GO:0009378	RECQL4 BLM
0.144081	5	53	4.11198	Ligase activity, forming carbon-nitrogen bonds	http://amigo.geneontology.org/amigo/term/GO:0016879	CPS1 GSS TTLL5 MTHFD1L FPGS
0.144081	2	6	14.529	Long-chain fatty acyl-CoA binding	http://amigo.geneontology.org/amigo/term/GO:0036042	ACOT7 PNPLA3
0.144327	3	18	7.2645	DNA polymerase binding	http://amigo.geneontology.org/amigo/term/GO:0070182	NABP2 FANCI CDT1
0.155687	6	77	3.39639	DNA helicase activity	http://amigo.geneontology.org/amigo/term/GO:0003678	RFC2 POLQ CHTF18 BRIP1 RECQL4 BLM
0.155687	6	77	3.39639	Oxidoreductase activity, acting on NAD(P)H, quinone or similar compound as acceptor	http://amigo.geneontology.org/amigo/term/GO:0016655	NDUFS8 NDUFB9 AKR1C2 NDUFB8 DCXR AKR1C1
0.158785	3	19	6.88216	Single-stranded DNA helicase activity	http://amigo.geneontology.org/amigo/term/GO:0017116	RFC2 POLQ CHTF18
0.158863	4	36	4.843	Disulfide oxidoreductase activity	http://amigo.geneontology.org/amigo/term/GO:0015036	TXNDC17 PTGES2 GSTO1 TXNRD2
0.15918	2	7	12.4534	Succinate transmembrane transporter activity	http://amigo.geneontology.org/amigo/term/GO:0015141	SLC13A3 SLC25A10
0.15918	10	182	2.39489	Isomerase activity	http://amigo.geneontology.org/amigo/term/GO:0016853	FKBP1A GSTZ1 FKBP8 PTPA EBP PTGES2 FUOM ECI1 PUSL1 PPIH
0.15918	6	79	3.3104	Kinase inhibitor activity	http://amigo.geneontology.org/amigo/term/GO:0019210	TRIB3 HSPB1 CIT SFN CIB1 PRKAR1B
0.15918	4	37	4.71211	Steroid dehydrogenase activity, acting on the CH-OH group of donors, NAD or NADP as acceptor	http://amigo.geneontology.org/amigo/term/GO:0033764	HSD17B10 AKR1C2 HSD11B2 AKR1C1
0.15918	2	7	12.4534	ATP-dependent DNA/DNA annealing activity	http://amigo.geneontology.org/amigo/term/GO:0036310	RECQL4 BLM
0.15918	3	20	6.53805	17-beta-hydroxysteroid dehydrogenase (NAD+) activity	http://amigo.geneontology.org/amigo/term/GO:0044594	HSD17B10 AKR1C2 AKR1C1
0.15918	2	7	12.4534	Class I DNA-(apurinic or apyrimidinic site) endonuclease activity	http://amigo.geneontology.org/amigo/term/GO:0140078	NTHL1 RPS3
0.178894	2	8	10.8967	Bubble DNA binding	http://amigo.geneontology.org/amigo/term/GO:0000405	RECQL4 BLM
0.178894	5	61	3.5727	Deoxyribonuclease activity	http://amigo.geneontology.org/amigo/term/GO:0004536	ERCC1 ZGRF1 RPS3 ISG20 NME1
0.178894	4	39	4.47046	Fatty acid binding	http://amigo.geneontology.org/amigo/term/GO:0005504	GSTP1 PRR7 ACOXL FABP4
0.178894	2	8	10.8967	Anaphase-promoting complex binding	http://amigo.geneontology.org/amigo/term/GO:0010997	UBE2S CDC20
0.178894	2	8	10.8967	Malate dehydrogenase activity	http://amigo.geneontology.org/amigo/term/GO:0016615	PHGDH MDH2
0.178894	7	109	2.79917	Oxidoreductase activity, acting on NAD(P)H	http://amigo.geneontology.org/amigo/term/GO:0016651	NDUFS8 NDUFB9 AKR1C2 NDUFB8 CYB5R2 DCXR AKR1C1
0.178894	3	22	5.94368	Acid-amino acid ligase activity	http://amigo.geneontology.org/amigo/term/GO:0016881	GSS TTLL5 FPGS
0.178894	3	21	6.22671	Carbohydrate kinase activity	http://amigo.geneontology.org/amigo/term/GO:0019200	GALK1 RBKS POMK
0.178894	2	8	10.8967	Androsterone dehydrogenase activity	http://amigo.geneontology.org/amigo/term/GO:0047023	AKR1C2 AKR1C1
0.178894	2	8	10.8967	DNA/DNA annealing activity	http://amigo.geneontology.org/amigo/term/GO:1990814	RECQL4 BLM
0.184137	4	41	4.25239	Frizzled binding	http://amigo.geneontology.org/amigo/term/GO:0005109	WNT5B WNT10A WNT9A WNT7B
0.184137	13	283	2.00223	Microtubule binding	http://amigo.geneontology.org/amigo/term/GO:0008017	KIF22 TPX2 BIRC5 EZR KIF3B KLC3 GLI1 TUBGCP2 KIF12 KIF2C RPS3 CEP57L1 KIF24
0.19339	2	9	9.686	JUN kinase binding	http://amigo.geneontology.org/amigo/term/GO:0008432	GSTP1 MAD2L2
0.19339	4	42	4.15114	Steroid dehydrogenase activity	http://amigo.geneontology.org/amigo/term/GO:0016229	HSD17B10 AKR1C2 HSD11B2 AKR1C1
0.19339	5	64	3.40523	Hydro-lyase activity	http://amigo.geneontology.org/amigo/term/GO:0016836	GMDS ECHS1 CYP1A1 ECI1 UROS
0.19339	8	141	2.47302	SH3 domain binding	http://amigo.geneontology.org/amigo/term/GO:0017124	SH2D2A SH3BP1 CIT MVB12A CBLC CABYR SHANK2 PTTG1
0.19339	2	9	9.686	U1 snRNA binding	http://amigo.geneontology.org/amigo/term/GO:0030619	SNRPA ISG20
0.19339	14	319	1.91291	GTPase binding	http://amigo.geneontology.org/amigo/term/GO:0051020	BIRC5 RANGAP1 KIF3B RASIP1 EXPH5 MLPH OPTN SYTL1 CDC42EP2 BICDL2 STOML2 CIB1 MYO1C INF2
0.19339	2	9	9.686	Small ribosomal subunit rRNA binding	http://amigo.geneontology.org/amigo/term/GO:0070181	RPS3 RPS14
0.19339	3	24	5.44837	Modified amino acid transmembrane transporter activity	http://amigo.geneontology.org/amigo/term/GO:0072349	SLC16A12 SLC13A3 SLC19A1
0.19339	24	653	1.60197	ATP-dependent activity	http://amigo.geneontology.org/amigo/term/GO:0140657	RFC2 POLQ SMC1B KIF22 ATP5F1D DMC1 KIF3B ABCD1 PTPA DYNLRB1 CHTF18 BRIP1 KIF12 ZGRF1 KIF2C ABCA12 RECQL4 PSMC3 RAD51B DNAH14 KIF24 BLM ATAD3A MYO1C
0.19339	2	9	9.686	Ubiquitin ligase inhibitor activity	http://amigo.geneontology.org/amigo/term/GO:1990948	RPS20 RPS15
0.199106	5	66	3.30205	Transferase activity, transferring alkyl or aryl (other than methyl) groups	http://amigo.geneontology.org/amigo/term/GO:0016765	GSTP1 NANS GSTZ1 MMAB GSTO1

## Sheet: 8 Downreg KEGG
Gene Ontology showing enrichment of KEGG pathways of downregulated differentially expressed genes (DEGs) common to 2 or more patients after 8-day in the perfusion device, treated with 1 µM GSK3368715 vs the DMSO control
Enrichment FDR	nGenes	Pathway Genes	Fold Enrichment	Pathway	URL	Genes
2.59072e-43	49	134	15.9385	Ribosome	http://www.genome.jp/kegg-bin/show_pathway?hsa03010	RPS20 RPL18 RPS5 MRPL28 RPLP0 RPL3 RPS19 RPL18A RPL28 RPS12 RPL24 RPS15 MRPS15 RPL21 MRPS2 RPS4Y1 RPL36 RPL27 RPS15A RPL35 RPS6 RPLP1 RPS24 RPS11 RPL13A RPL32 RPS3A RPS3 MRPL17 RPL8 RPL29 RPL22L1 RPL9 RPS14 RPL36AL RPL27A RPL13 RPSA RPS21 RPL38 RPL4 MRPL11 RPLP2 MRPL14 MRPL21 RPL12 RPS29 UBA52 MRPL12
2.04768e-23	42	232	7.89075	Coronavirus disease	http://www.genome.jp/kegg-bin/show_pathway?hsa05171	RPS20 RPL18 RPS5 RPLP0 RPL3 RPS19 RPL18A RPL28 RPS12 RPL24 RPS15 RPL21 RPS4Y1 RPL36 RPL27 RPS15A RPL35 RPS6 RPLP1 RPS24 RPS11 RPL13A RPL32 RPS3A RPS3 RPL8 RPL29 RPL22L1 RPL9 RPS14 RPL36AL RPL27A RPL13 RPSA RPS21 RPL38 RPL4 RPLP2 ISG15 RPL12 RPS29 UBA52
9.56722e-05	65	1527	1.85537	Metabolic pathways	http://www.genome.jp/kegg-bin/show_pathway?hsa01100	UQCRC1 XYLT2 CPS1 MSMO1 ST6GALNAC2 HSD17B10 GSTP1 BLVRB PHGDH NANS ATP5F1D MCAT PNPLA3 GSTZ1 GSS PIGU FAH GALK1 NDUFS8 GMDS B4GALT2 GALNT12 MTHFD1L LRAT ATP5F1E NT5C COX6B1 ECHS1 TST ALDH3B2 NT5E FPGS ATIC HADH B4GALNT3 MMAB AK7 CYP1A1 MDH2 EBP NDUFB9 PTGES2 GSTO1 TKFC COX6B2 NUDT2 LARGE2 NDUFB8 PIP5KL1 MVD TK1 AGPAT2 DCXR RBKS RRM2 SPHK1 HSD11B2 B3GNT3 PGP POMK AKR1C1 UROS APRT NME1 ACY1
0.000134041	29	475	2.6611	Pathways of neurodegeneration	http://www.genome.jp/kegg-bin/show_pathway?hsa05022	UQCRC1 CAMK2B HSD17B10 ATP5F1D KLC3 NDUFS8 WNT5B OPTN ATP5F1E COX6B1 MAP2K2 TRAF2 TUBA4A SEM1 TOMM40 WNT10A PSMB7 PSMB6 WNT9A NDUFB9 COX6B2 PSMC3 NDUFB8 PSMD1 SPTBN2 PSMD13 DNAH14 WNT7B UBA52
0.00048549	21	306	2.99126	Huntington disease	http://www.genome.jp/kegg-bin/show_pathway?hsa05016	UQCRC1 AP2S1 ATP5F1D KLC3 NDUFS8 ATP5F1E COX6B1 TRAF2 TUBA4A SEM1 PSMB7 PSMB6 NDUFB9 COX6B2 PSMC3 NDUFB8 PSMD1 CLTB PSMD13 DNAH14 TGM2
0.00131783	23	383	2.6175	Alzheimer disease	http://www.genome.jp/kegg-bin/show_pathway?hsa05010	UQCRC1 HSD17B10 ATP5F1D KLC3 NDUFS8 WNT5B ATP5F1E COX6B1 MAP2K2 TRAF2 TUBA4A SEM1 WNT10A PSMB7 PSMB6 WNT9A NDUFB9 COX6B2 PSMC3 NDUFB8 PSMD1 PSMD13 WNT7B
0.00179559	18	266	2.9495	Parkinson disease	http://www.genome.jp/kegg-bin/show_pathway?hsa05012	UQCRC1 CAMK2B ATP5F1D KLC3 NDUFS8 ATP5F1E COX6B1 TUBA4A SEM1 PSMB7 PSMB6 NDUFB9 COX6B2 PSMC3 NDUFB8 PSMD1 PSMD13 UBA52
0.00660713	17	272	2.72419	Prion disease	http://www.genome.jp/kegg-bin/show_pathway?hsa05020	UQCRC1 ATP5F1D KLC3 CAV2 NDUFS8 ATP5F1E COX6B1 TUBA4A SEM1 PSMB7 PSMB6 NDUFB9 COX6B2 PSMC3 NDUFB8 PSMD1 PSMD13
0.00896744	20	363	2.40149	Amyotrophic lateral sclerosis	http://www.genome.jp/kegg-bin/show_pathway?hsa05014	UQCRC1 ATP5F1D KLC3 NDUFS8 OPTN ATP5F1E COX6B1 TRAF2 TUBA4A SEM1 TOMM40 PSMB7 PSMB6 NDUFB9 COX6B2 PSMC3 NDUFB8 PSMD1 PSMD13 DNAH14
0.0162055	6	46	5.68526	Proteasome	http://www.genome.jp/kegg-bin/show_pathway?hsa03050	SEM1 PSMB7 PSMB6 PSMC3 PSMD1 PSMD13
0.0348145	6	54	4.843	Fanconi anemia pathway	http://www.genome.jp/kegg-bin/show_pathway?hsa03460	ERCC1 RPA3 BRIP1 FANCI RMI2 BLM
0.0386053	6	56	4.67004	Pyrimidine metabolism	http://www.genome.jp/kegg-bin/show_pathway?hsa00240	NT5C NT5E NUDT2 TK1 RRM2 NME1
0.0414208	13	223	2.54095	Chemical carcinogenesis	http://www.genome.jp/kegg-bin/show_pathway?hsa05208	UQCRC1 ATP5F1D NDUFS8 ATP5F1E COX6B1 MAP2K2 CYP1A1 NDUFB9 GSTO1 AKR1C2 COX6B2 NDUFB8 AKR1C1
0.0448518	5	41	5.31549	Homologous recombination	http://www.genome.jp/kegg-bin/show_pathway?hsa03440	RPA3 SEM1 BRIP1 RAD51B BLM
0.0448518	9	126	3.11336	Cell cycle	http://www.genome.jp/kegg-bin/show_pathway?hsa04110	SMC1B CDC45 E2F1 MAD2L2 CDC20 CCNB2 PTTG1 CDK1 SFN
0.0529726	6	63	4.15114	Basal cell carcinoma	http://www.genome.jp/kegg-bin/show_pathway?hsa05217	GLI1 WNT5B DDB2 WNT10A WNT9A WNT7B
0.0597588	9	134	2.92748	Oxidative phosphorylation	http://www.genome.jp/kegg-bin/show_pathway?hsa00190	UQCRC1 ATP5F1D LHPP NDUFS8 ATP5F1E COX6B1 NDUFB9 COX6B2 NDUFB8
0.0780527	9	142	2.76256	Spinocerebellar ataxia	http://www.genome.jp/kegg-bin/show_pathway?hsa05017	SLC1A6 TRAF2 SEM1 PSMB7 PSMB6 PSMC3 PSMD1 SPTBN2 PSMD13
0.0780527	10	167	2.61	Hepatocellular carcinoma	http://www.genome.jp/kegg-bin/show_pathway?hsa05225	GSTP1 E2F1 WNT5B MAP2K2 DDB2 WNT10A WNT9A GSTO1 TXNRD2 WNT7B
0.109562	8	126	2.76743	Purine metabolism	http://www.genome.jp/kegg-bin/show_pathway?hsa00230	NT5C NT5E ATIC AK7 NUDT2 RRM2 APRT NME1
0.109562	6	77	3.39639	Ribosome biogenesis in eukaryotes	http://www.genome.jp/kegg-bin/show_pathway?hsa03008	REXO5 TCOF1 EMG1 TBL3 RRP7A PWP2
0.182776	3	23	5.68526	Mannose type O-glycan biosynthesis	http://www.genome.jp/kegg-bin/show_pathway?hsa00515	B4GALT2 LARGE2 POMK
