# Supplementary material for: Investigating the effects of arginine methylation inhibitors on microdissected brain tumour biopsies maintained in a miniaturised perfusion system
Source: Royal Society of Chemistry journal article supplement (doi:10.1039/d3lc00204g), 2023-01-01
Supplement: d3lc00204g12.xlsx [file d3lc00204g12.xlsx]

## Sheet: Supplementary Table 4 Legend
Supplementary Table 4: Gene lists of significantly (p<0.05) alternative spliced genes in 2 or more patients (D31-D34) which correspond with known FUS splicing targets (Nakaya et al. 2013), or in proteins which show arginine methylation switches after GSK3368712 treatment (Fedoriw et al 2019)
Relating to Figure 6
1: Alternatively spliced genes correlating with Nakaya et al. 2013 data
2: Alternatively spliced genes correlating with Fedoriw et al. 2019 data

## Sheet: Nakaya et al. 2013
CSMD1
FRMD4A
KCNMA1
NRXN3
NRXN1
PTPRD
DIP2C
AUTS2
ZBTB16
MEG3
NTRK3
KALRN
ANK2
CAMTA1
MSI2
LSAMP
NCOR2
MSRA
HDAC4
PPP2R2B
ANK3
BIN1
GRIK2
NFASC
ANKRD11
GRIA2
TBC1D22A
QKI
ARHGAP26
SSBP3
MAPT
CAMK2B
MPRIP
PCDH7
ROBO1
LDB2
PARD3
RXRA
MAGI1
KIAA1217
MAPK10
KIF1B
SRGAP3
FOXN3
TRERF1
MIAT
DNM1
PTK2
DOCK9
SEMA4D
BRSK2
CTBP2
ARHGEF7
C1orf61
PKD1
MICAL2
NRG1
PTPRS
NBPF1
SNTG1
PDXK
DENND1A
TBCD
NFIB
DGKi
FBRSL1
KLC1
EPN2
SLC39A11
R3HDM1
MEGF11
APP
DDX17
SPTAN1
THRB
BTBD9
ESYT2
PLEKHA6
SIPA1L1
TSNARE1
TRPM3
LPP
SYNE1
RAP1GAP2
IMMP2L
NRXN2
CACNB4
CACNA1A
MAST4
SDK1
APBB2
EPS15L1
BRF1
BCAS3
MYO18A
GRB10
ANKRD36
MBD5
RNF220
CNKSR2
RALGDS
EIF4G3
DAZAP1
TNK2
DGKZ
NDRG4
PI4KA
NFIX
RAB11FIP3
CLSTN1
EPB41L2
PRODH
CDC42BPA
ZBTB38
EPHB1
DYNC1I1
SGIP1
CCDC57
ABLIM1
WNK1
EPB41L1
AACS
KCNAB2
CTNND1
MAP4K4
CLASP1
UBR3
CLEC16A
HDAC9
EphB1
TNRC6A
RAP1GAP
HNRNPA2B1
NADK
TBC1D5
KDM4C

## Sheet: Fedoriw et al. 2019
CNBP
DAZAP1
DDX5
EIF4G3
BCLAF1
TRA2B
NCOR2
EP400
QKI
ZNF568
SVIL
DSTYK
FOXRED1
GIGYF2
SRRT
MEF2B
TMC6
EIF3H
FAM104A
TRIP6
CNN2
HNRNPH1
ARHGAP32
DTX2
SIRT7
G3BP2
HNRNPA2B1
SLAIN2
DNM2
TARDBP
TNIP1
ALG8
RBFOX2
DDX17
AKAP8L
KANK2
DCXR
AKAP8
RBM39
MROH6
PLEKHA6
ATXN2L
ANKZF1
DONSON
SLTM
SMARCD1
PDLIM7
RGS3
MINK1
LSM14A
USP54
NDUFS2
GMIP
ZSWIM8
MTCH1
COL4A3BP
U2AF1
ILF3
DROSHA
FBXO44
EIF4G1
SF1
ZC3H13
TAF6
PML
RCCD1
NOP56
BPTF
MBD6
KCNAB2
ZNF451
ZFC3H1
TBC1D10C
SRSF1
SNRPN
MSI2
WRN
LAS1L
ACIN1
TCF3
EWSR1
RBMX
CIRBP
YBX3
SNRPB
GIPC1
SRSF5
REXO2
SERBP1
PARD3
ZGPAT
