# Supplementary figures and images for: Investigating the effects of arginine methylation inhibitors on microdissected brain tumour biopsies maintained in a miniaturised perfusion system
Source: Royal Society of Chemistry journal article supplement (doi:10.1039/d3lc00204g), 2023-01-01

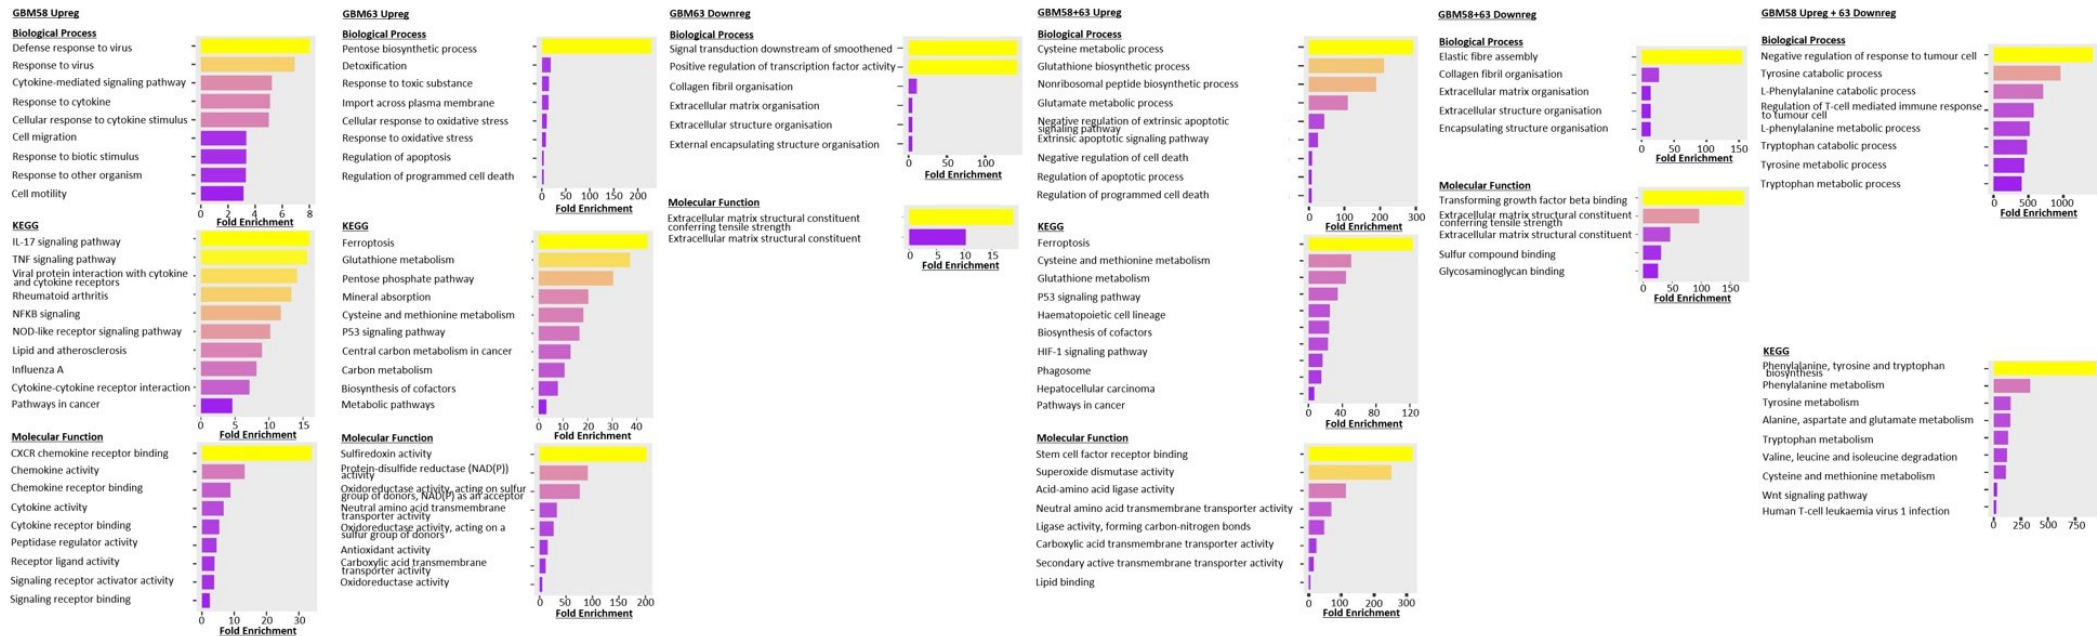

Supplementary Figure 1: ShinyGO analysis of GBM58 and GBM63 primary cells lines Pre- vs 3-days Post-chip.

Supplement: d3lc00204g2.pdf [file d3lc00204g2.pdf]
